# Supplementary material
Source: PubMed Central journal article supplement (PMC4924472)

## **Supporting Information: Spectra Data**

### **Remote Oxidation of Aliphatic C—H Bonds in Nitrogen-Containing Molecules**

Jennifer M. Howell<sup>‡</sup>, Kaibo Feng<sup>‡</sup>, Joseph R. Clark, Louis J. Trzepkowski and M. Christina White\*

Roger Adams Laboratory, Department of Chemistry, University of Illinois, Urbana, Illinois 61801, United States

| Parameter              | Value   |
|------------------------|---------|
| Origin                 | Varian  |
| Spectrometer           | inova   |
| Solvent                | CDCl3   |
| Temperature            | 20.0    |
| Pulse Sequence         | s2pul   |
| Experiment             | 1D      |
| Probe                  | hcn     |
| Number of Scans        | 16      |
| Receiver Gain          | 28      |
| Relaxation Delay       | 2.0000  |
| Pulse Width            | 0.0000  |
| Acquisition Time       | 4.0960  |
| Spectrometer Frequency | 500.07  |
| Spectral Width         | 8000.0  |
| Lowest Frequency       | -1511.6 |
| Nucleus                | 1H      |
| Acquired Size          | 32768   |
| Spectral Size          | 65536   |

CC(C)CCc1cccnc1

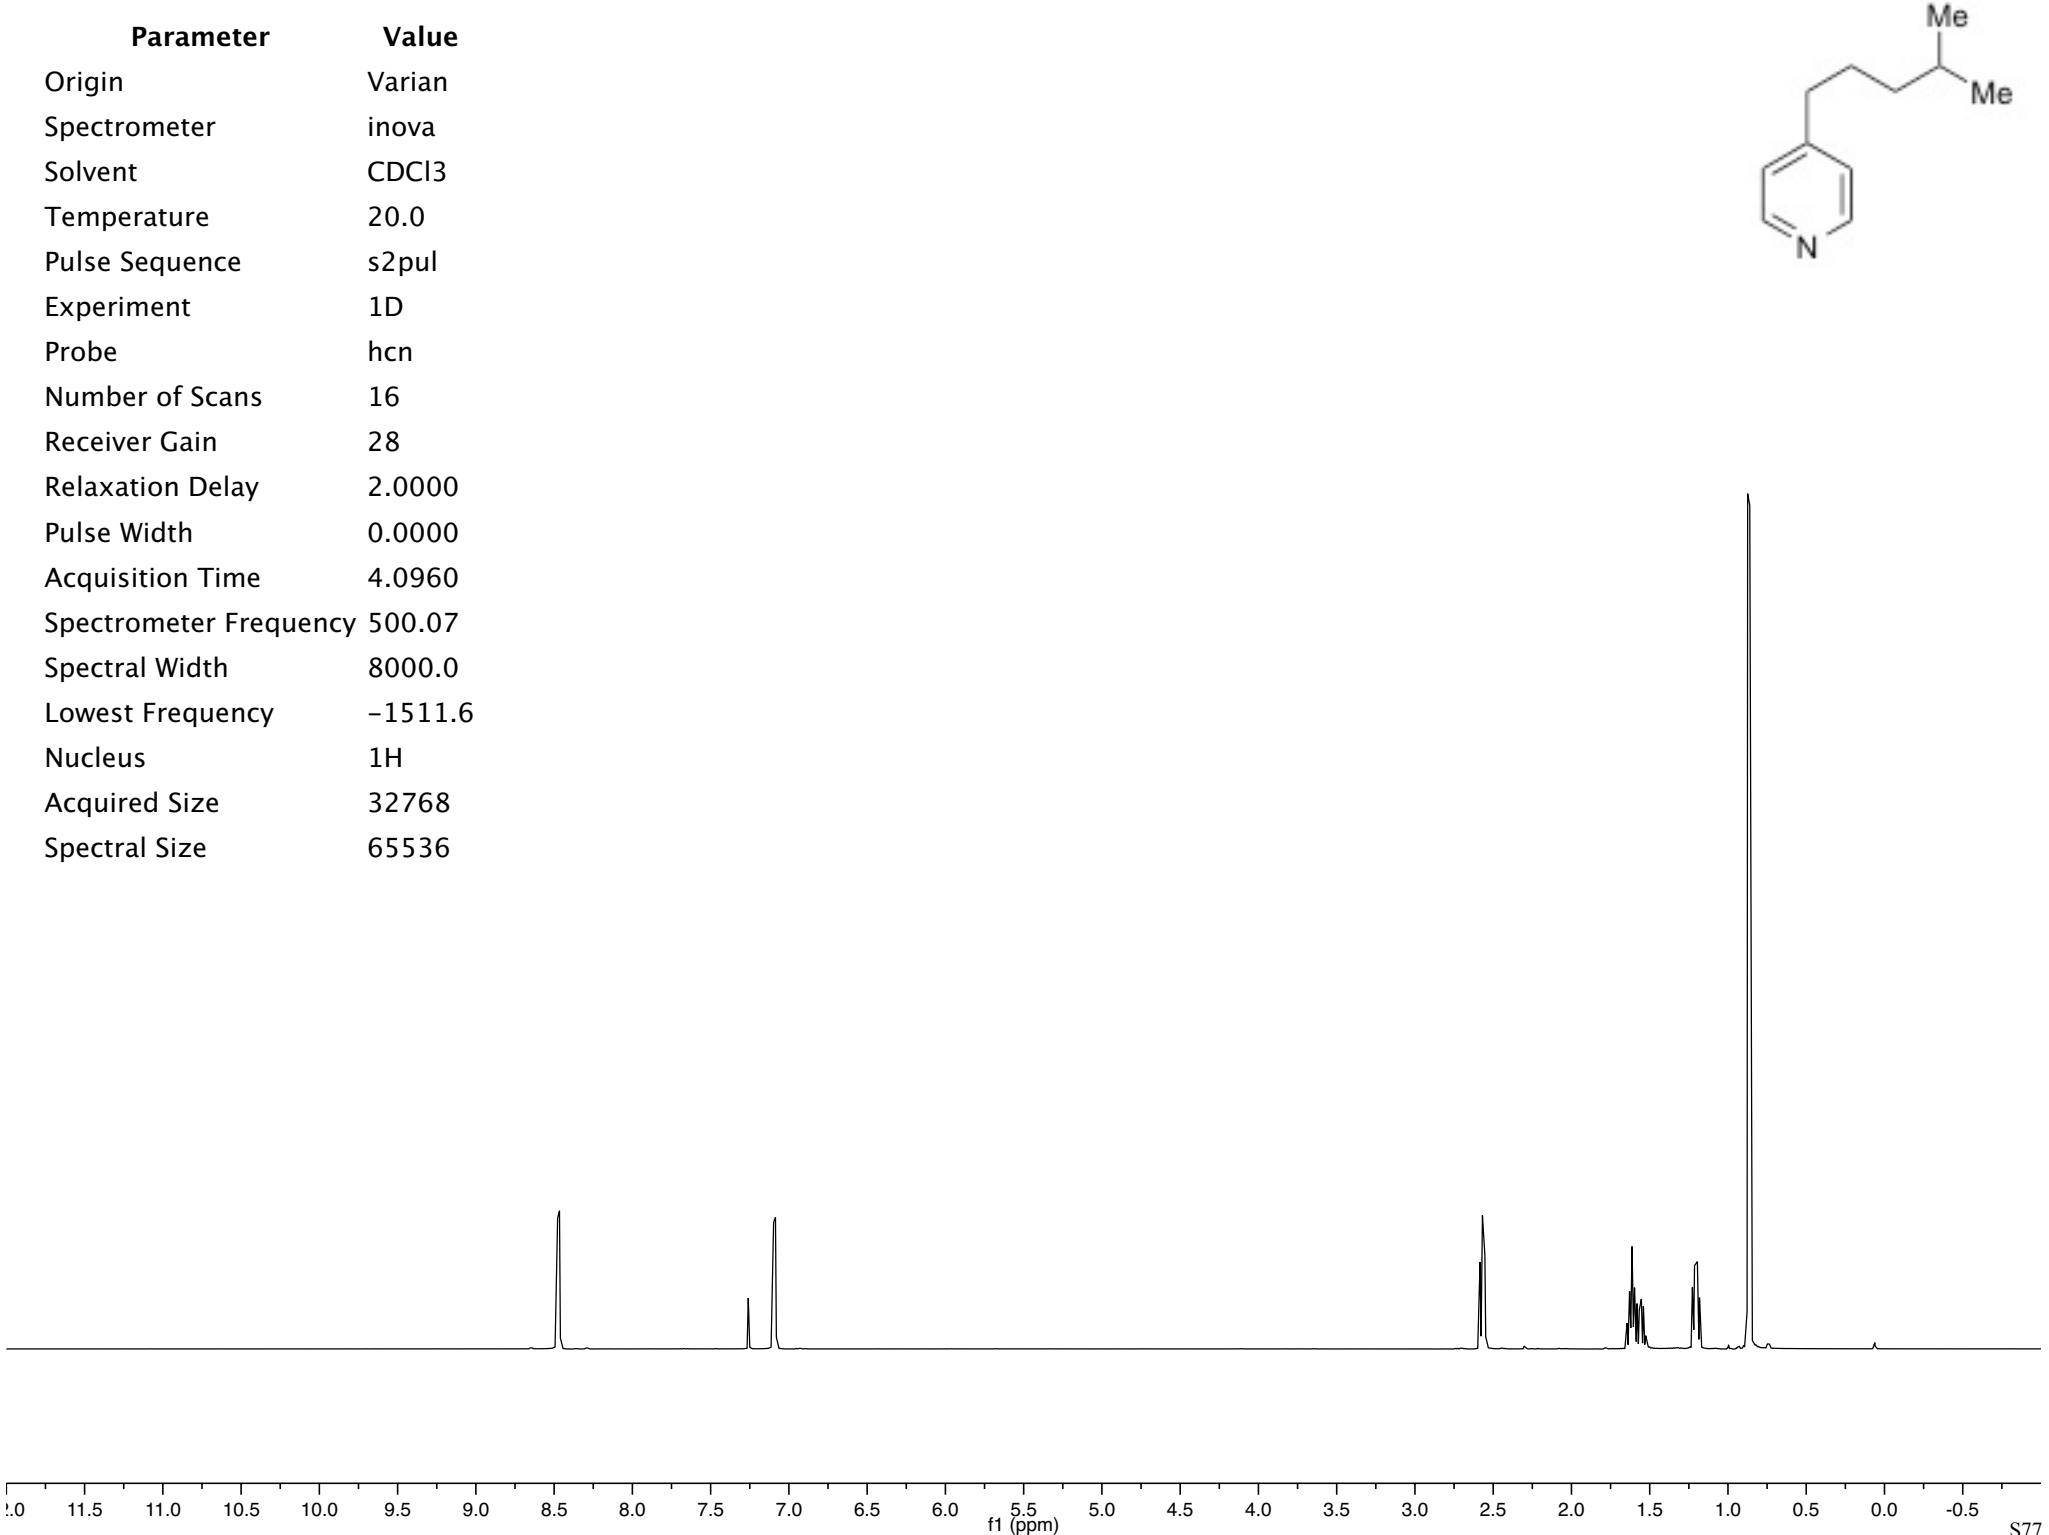

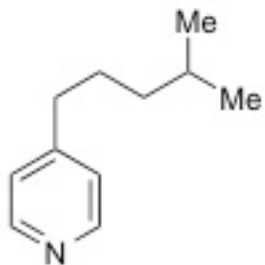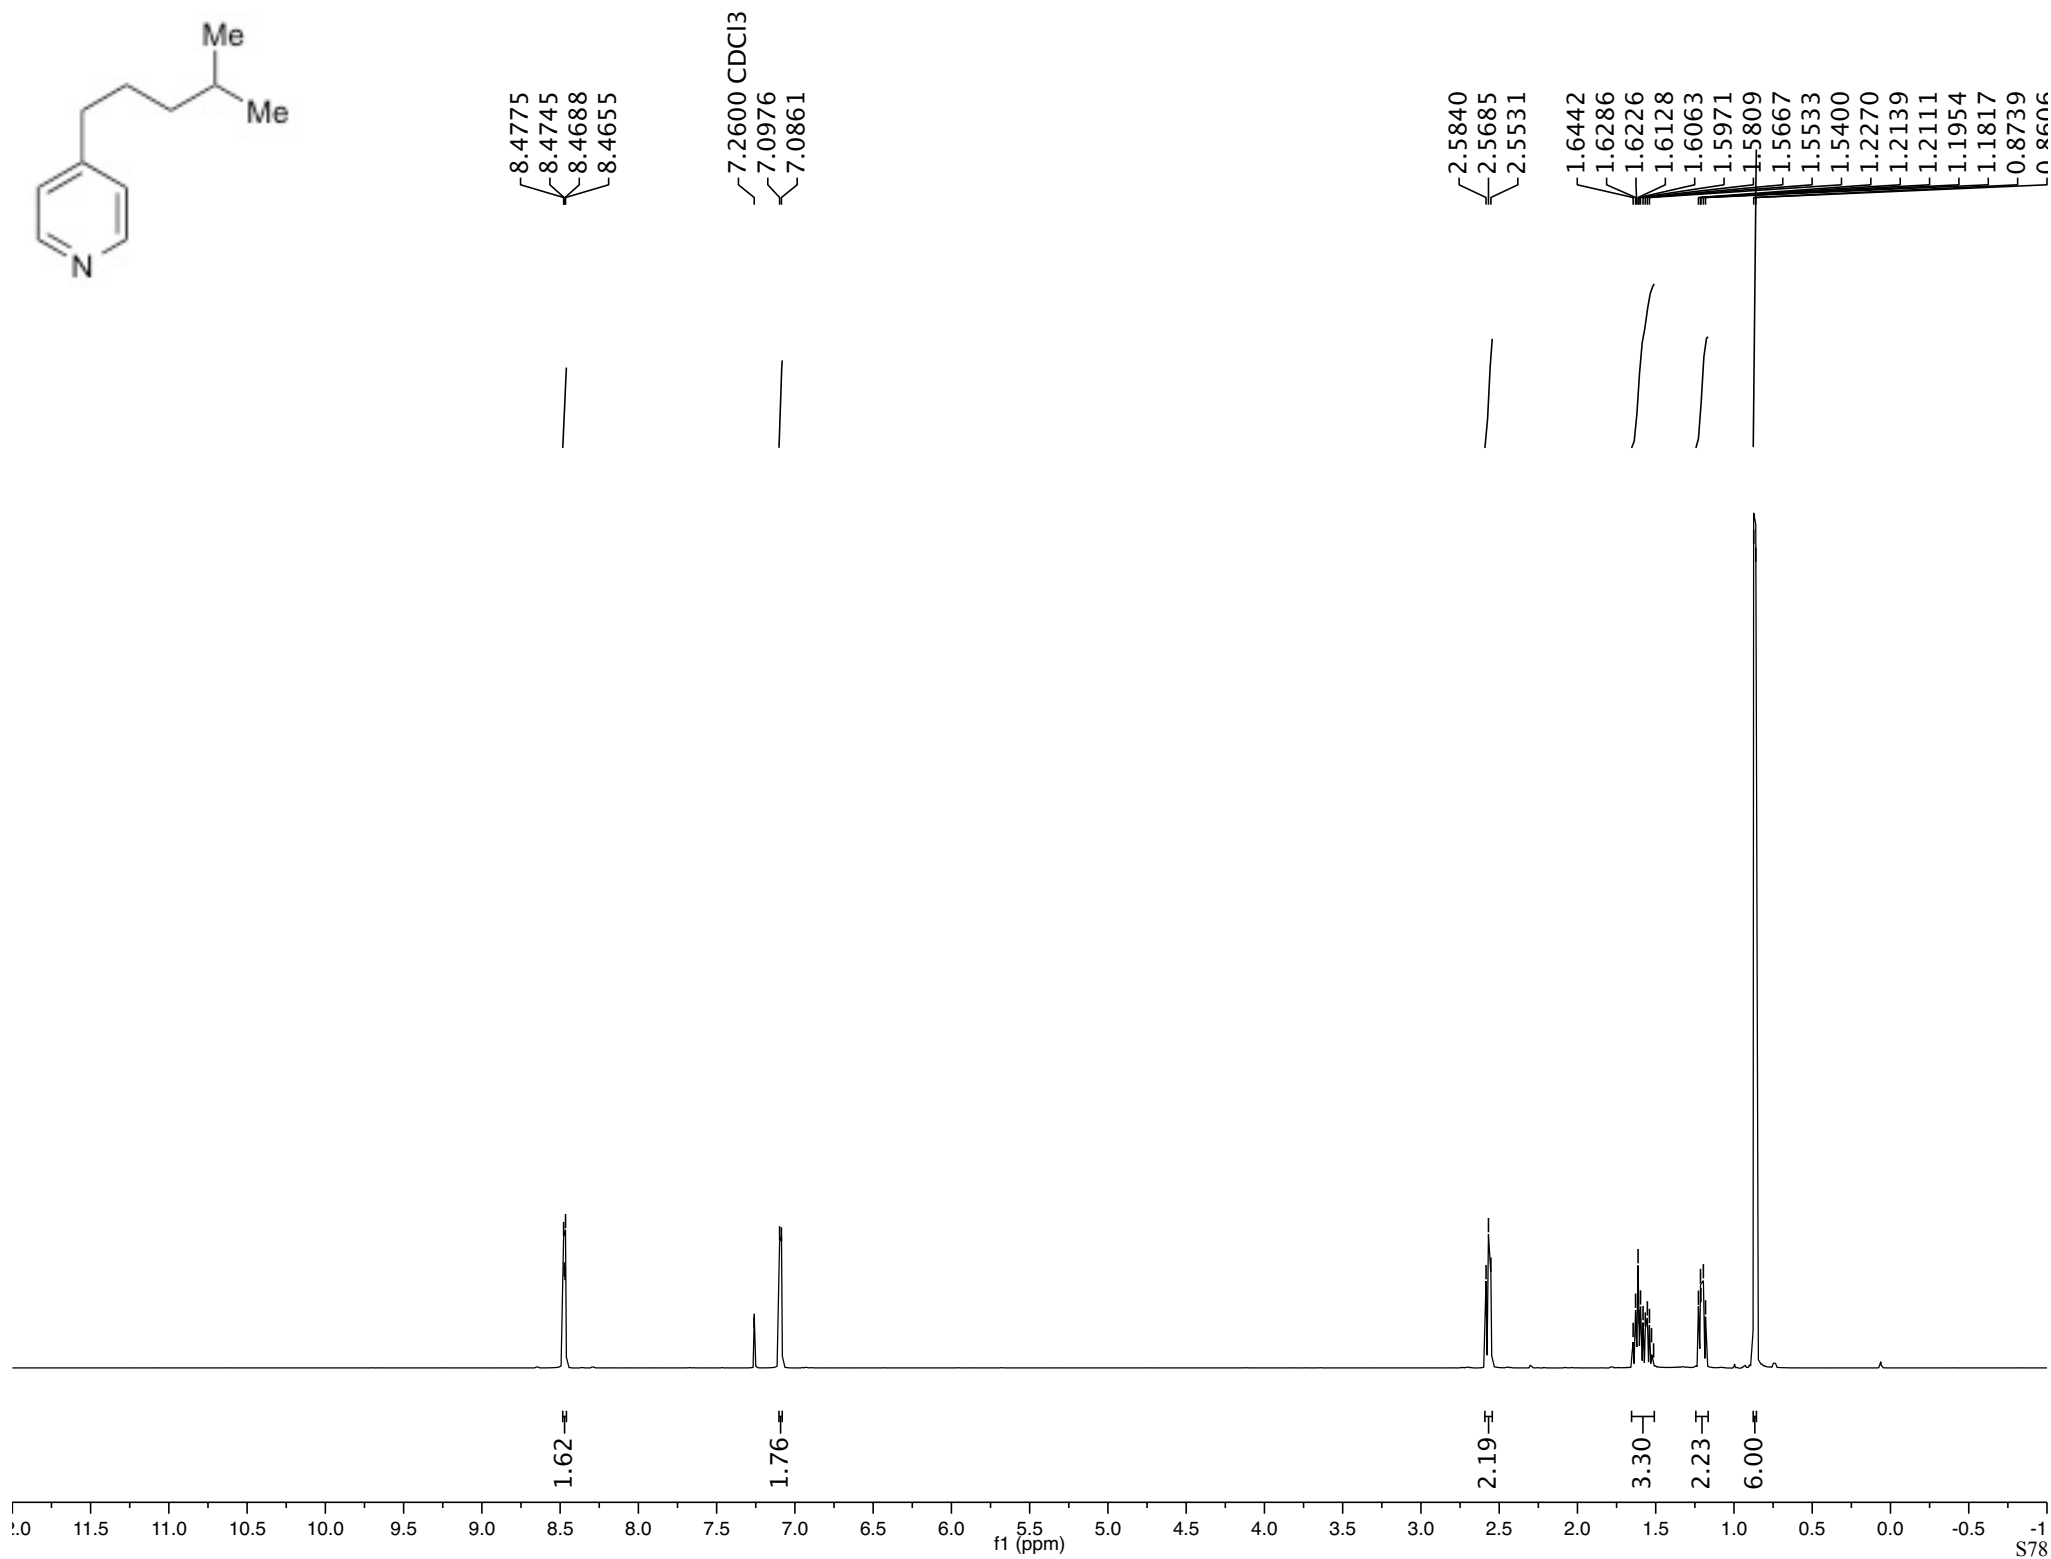

| Parameter              | Value           |
|------------------------|-----------------|
| Origin                 | Varian          |
| Spectrometer           | inova           |
| Solvent                | CDCl3           |
| Temperature            | 20.0            |
| Pulse Sequence         | s2pul           |
| Experiment             | 1D              |
| Probe                  | QUAD            |
| Number of Scans        | 176             |
| Receiver Gain          | 60              |
| Relaxation Delay       | 2.0000          |
| Pulse Width            | 0.0000          |
| Acquisition Time       | 1.0863          |
| Spectrometer Frequency | 125.66          |
| Spectral Width         | 30165.9         |
| Lowest Frequency       | -1271.6         |
| Nucleus                | <sup>13</sup> C |
| Acquired Size          | 32768           |
| Spectral Size          | 65536           |

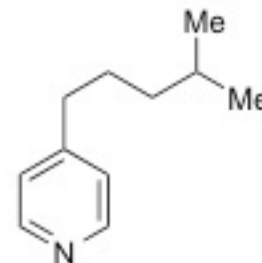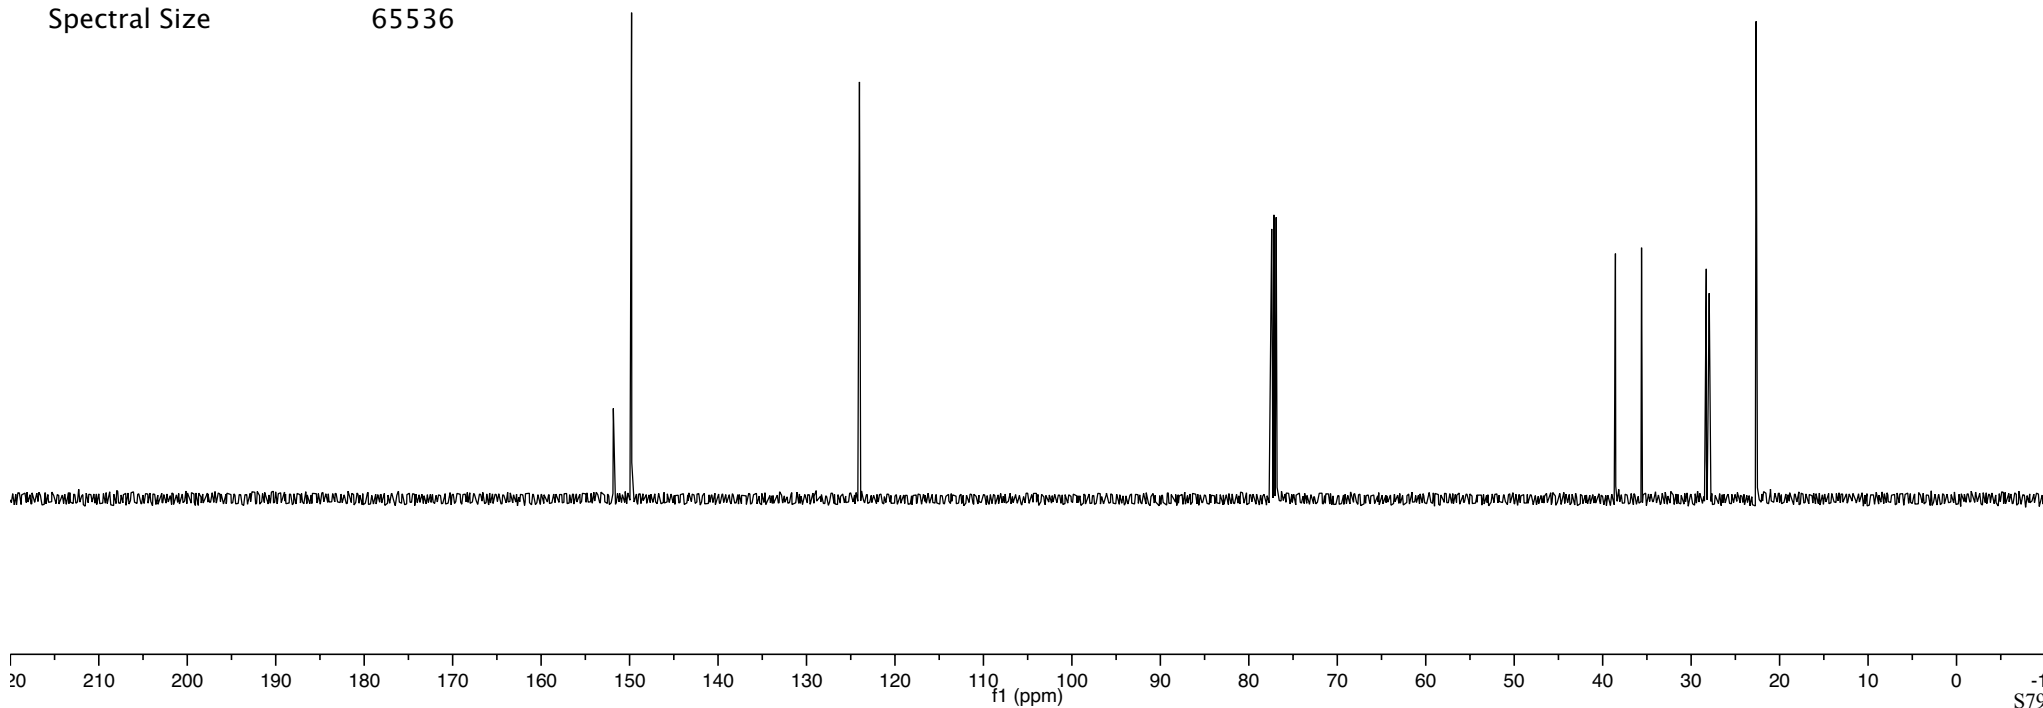



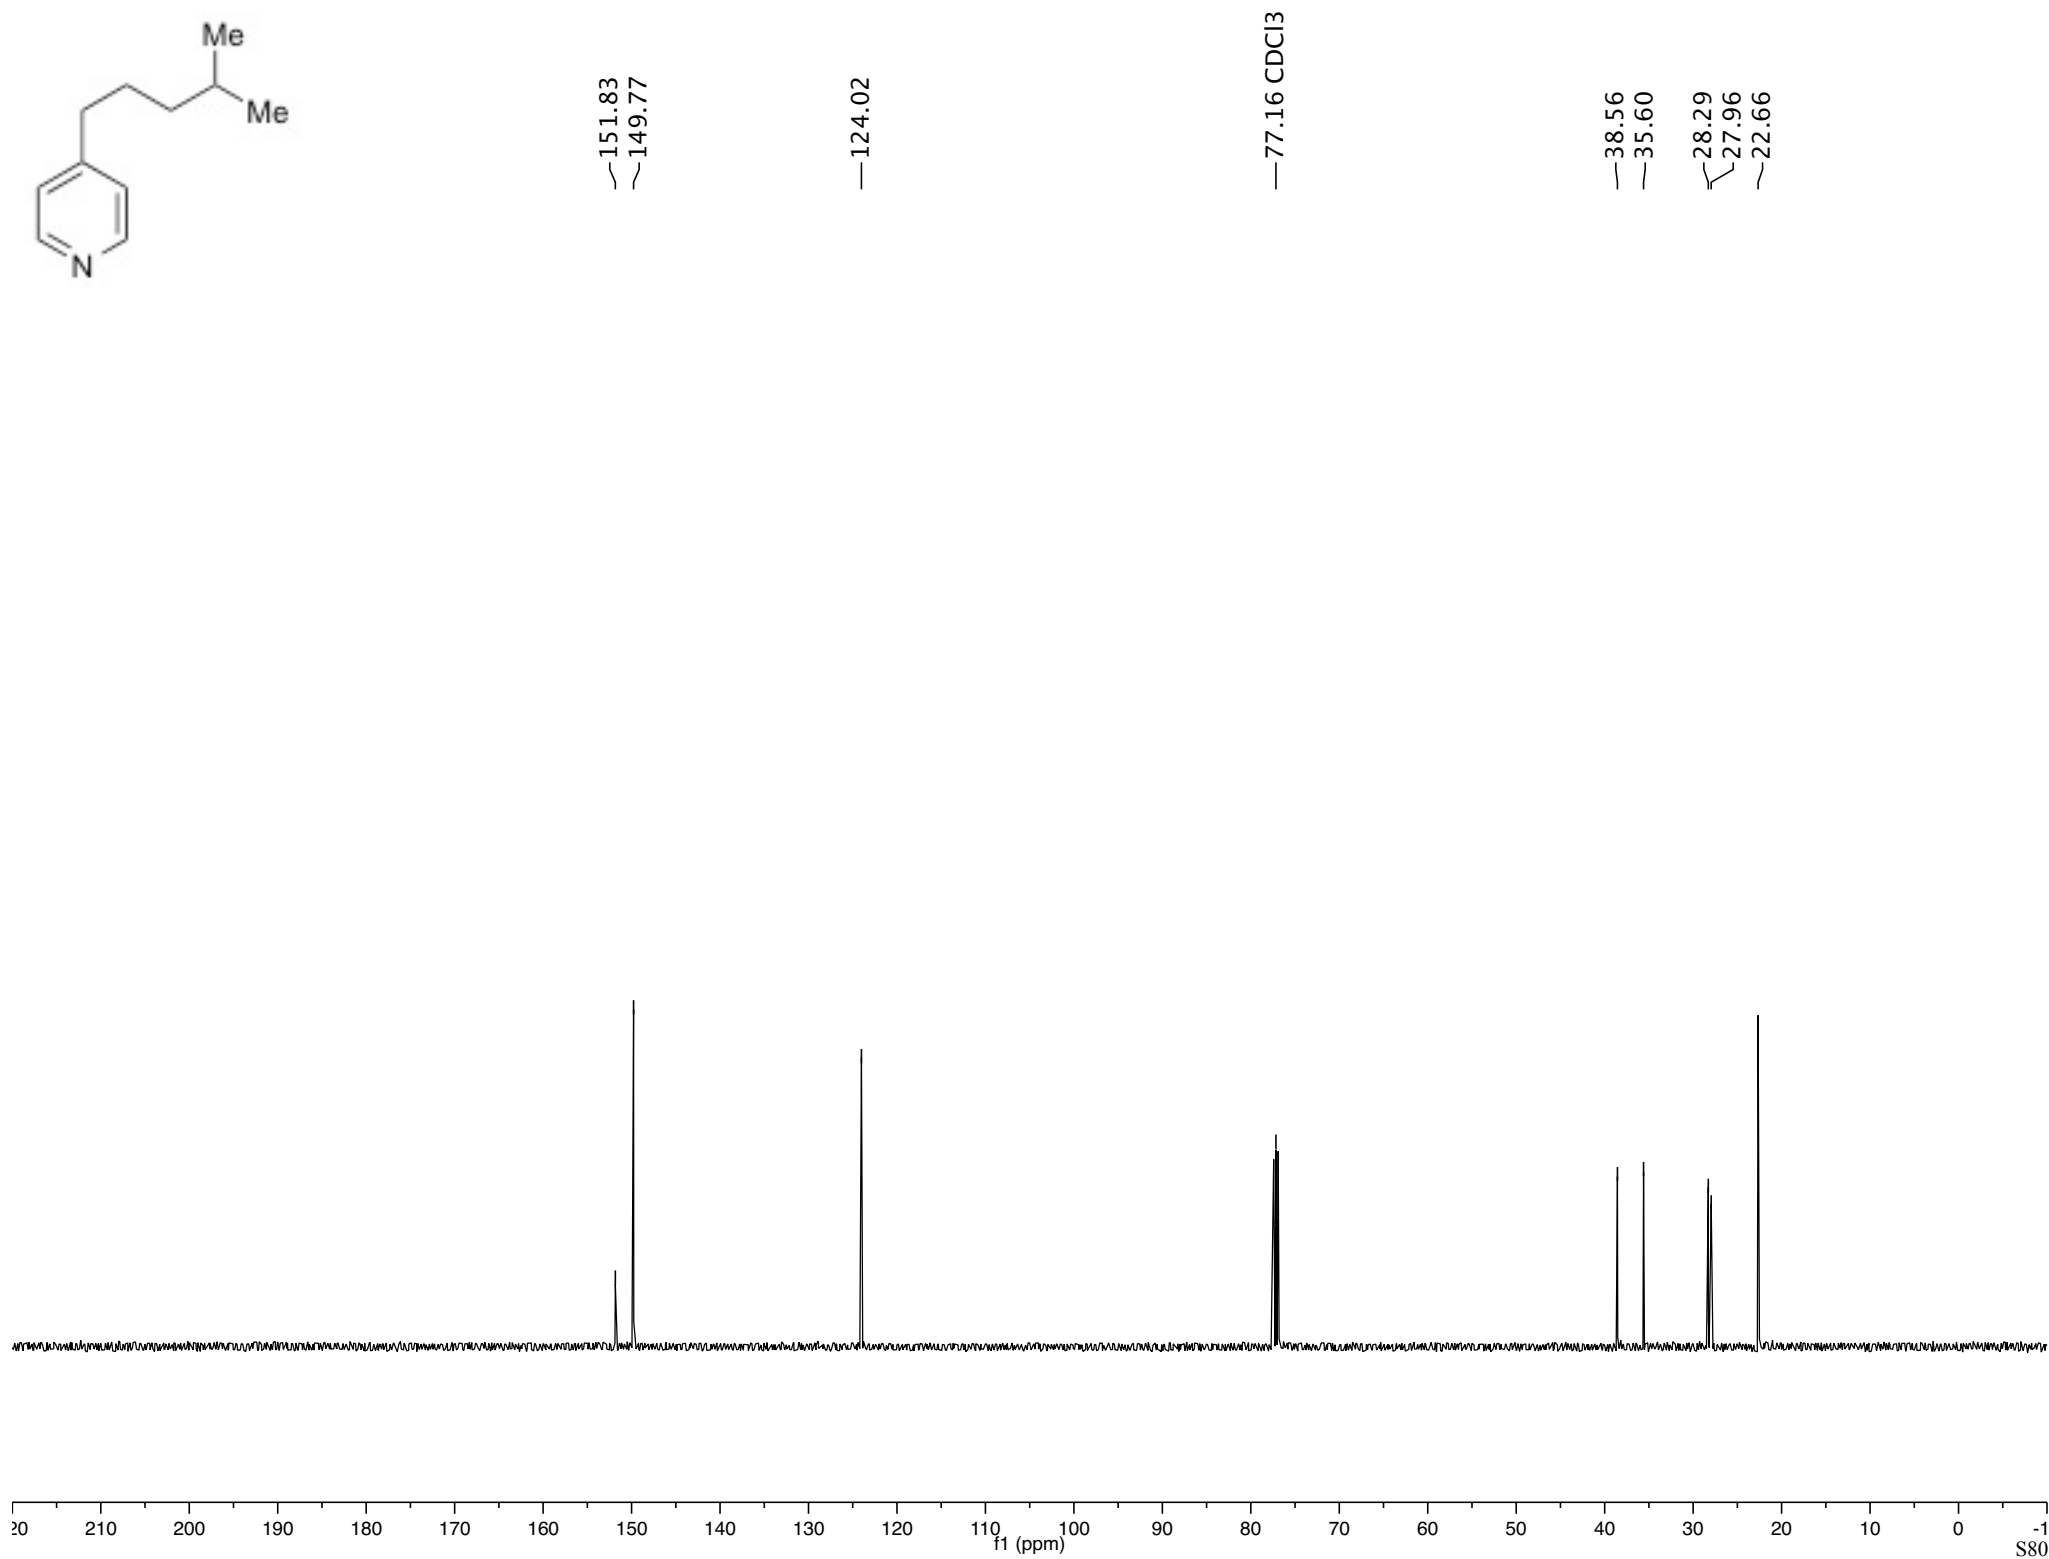

| Parameter              | Value          |
|------------------------|----------------|
| Origin                 | Varian         |
| Spectrometer           | inova          |
| Solvent                | CDCl3          |
| Temperature            | 20.0           |
| Pulse Sequence         | s2pul          |
| Experiment             | 1D             |
| Probe                  | hcn            |
| Number of Scans        | 16             |
| Receiver Gain          | 26             |
| Relaxation Delay       | 2.0000         |
| Pulse Width            | 0.0000         |
| Acquisition Time       | 4.0960         |
| Spectrometer Frequency | 500.07         |
| Spectral Width         | 8000.0         |
| Lowest Frequency       | -1511.1        |
| Nucleus                | <sup>1</sup> H |
| Acquired Size          | 32768          |
| Spectral Size          | 65536          |

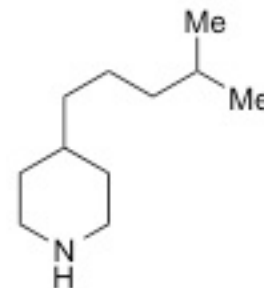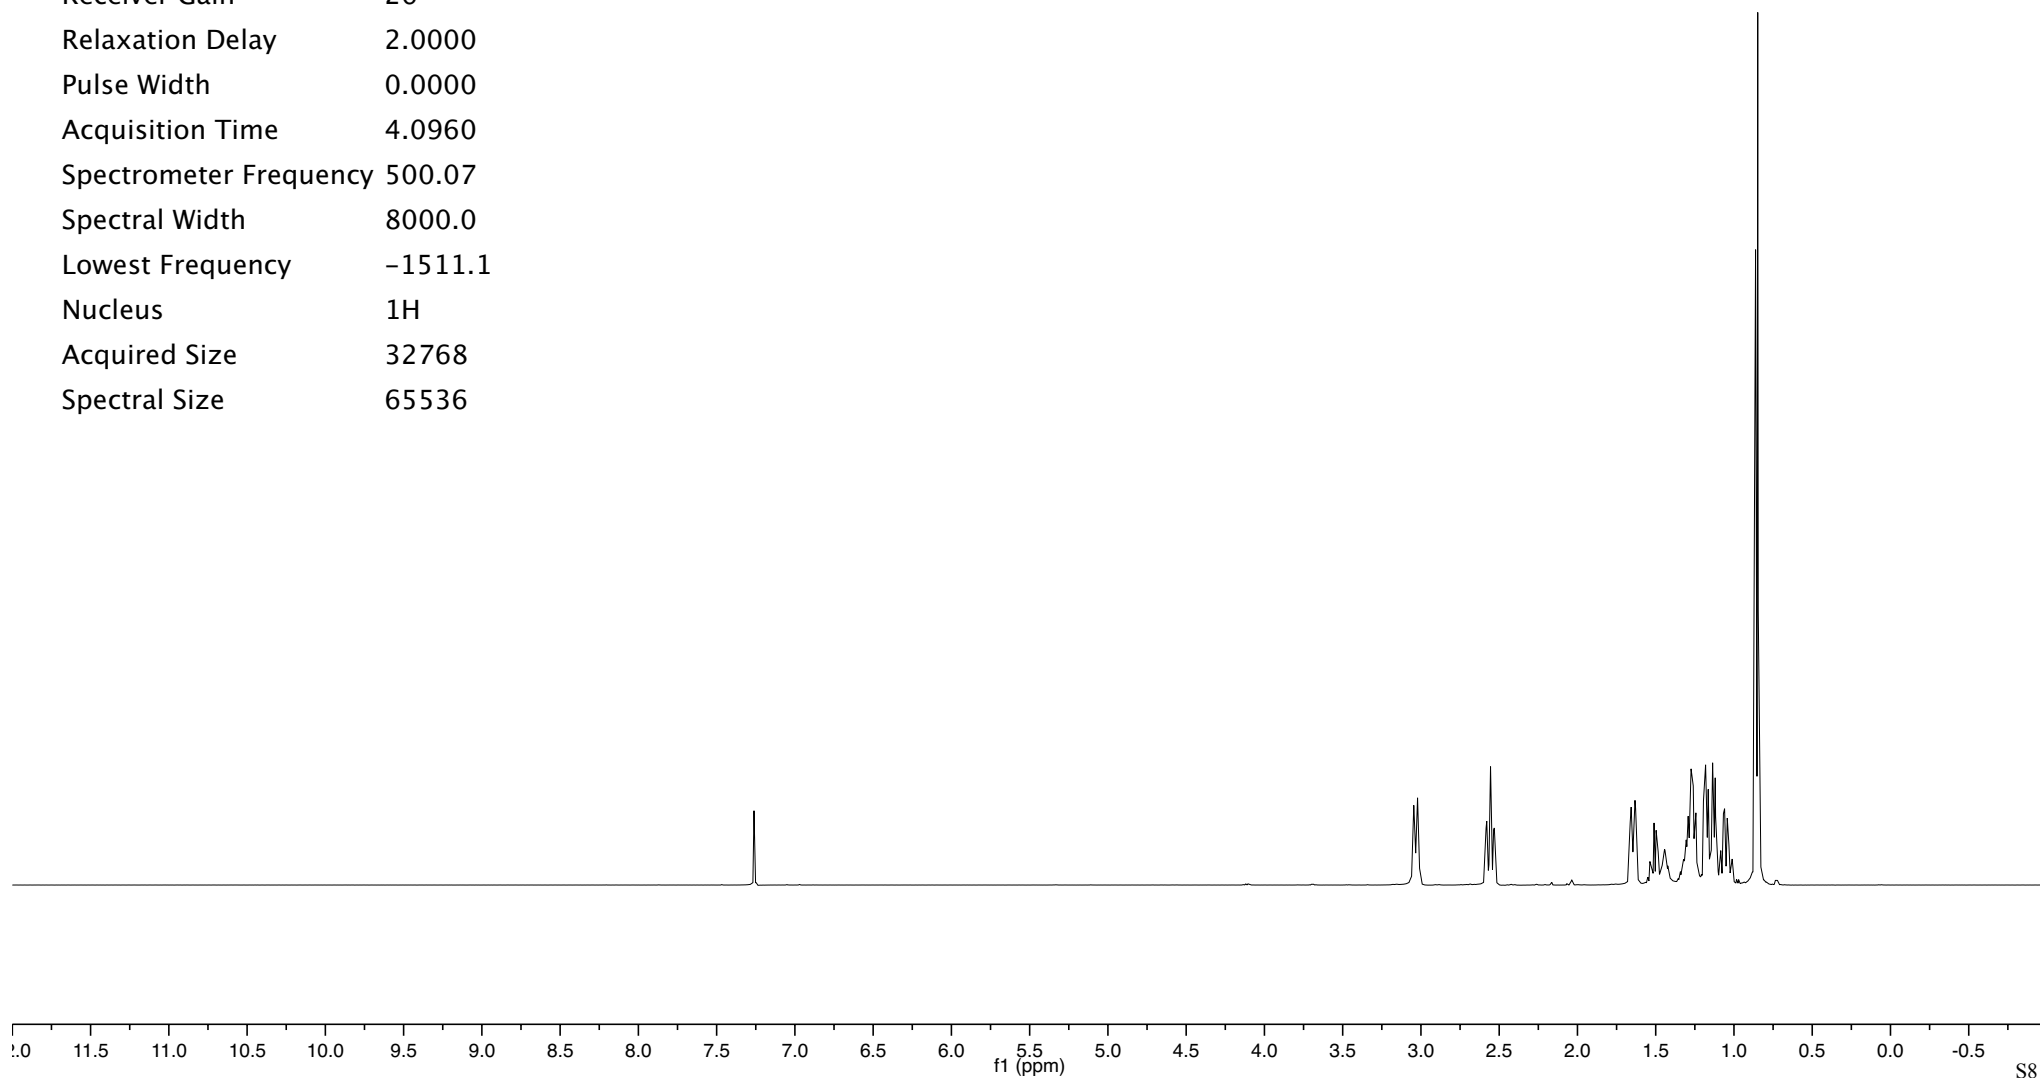

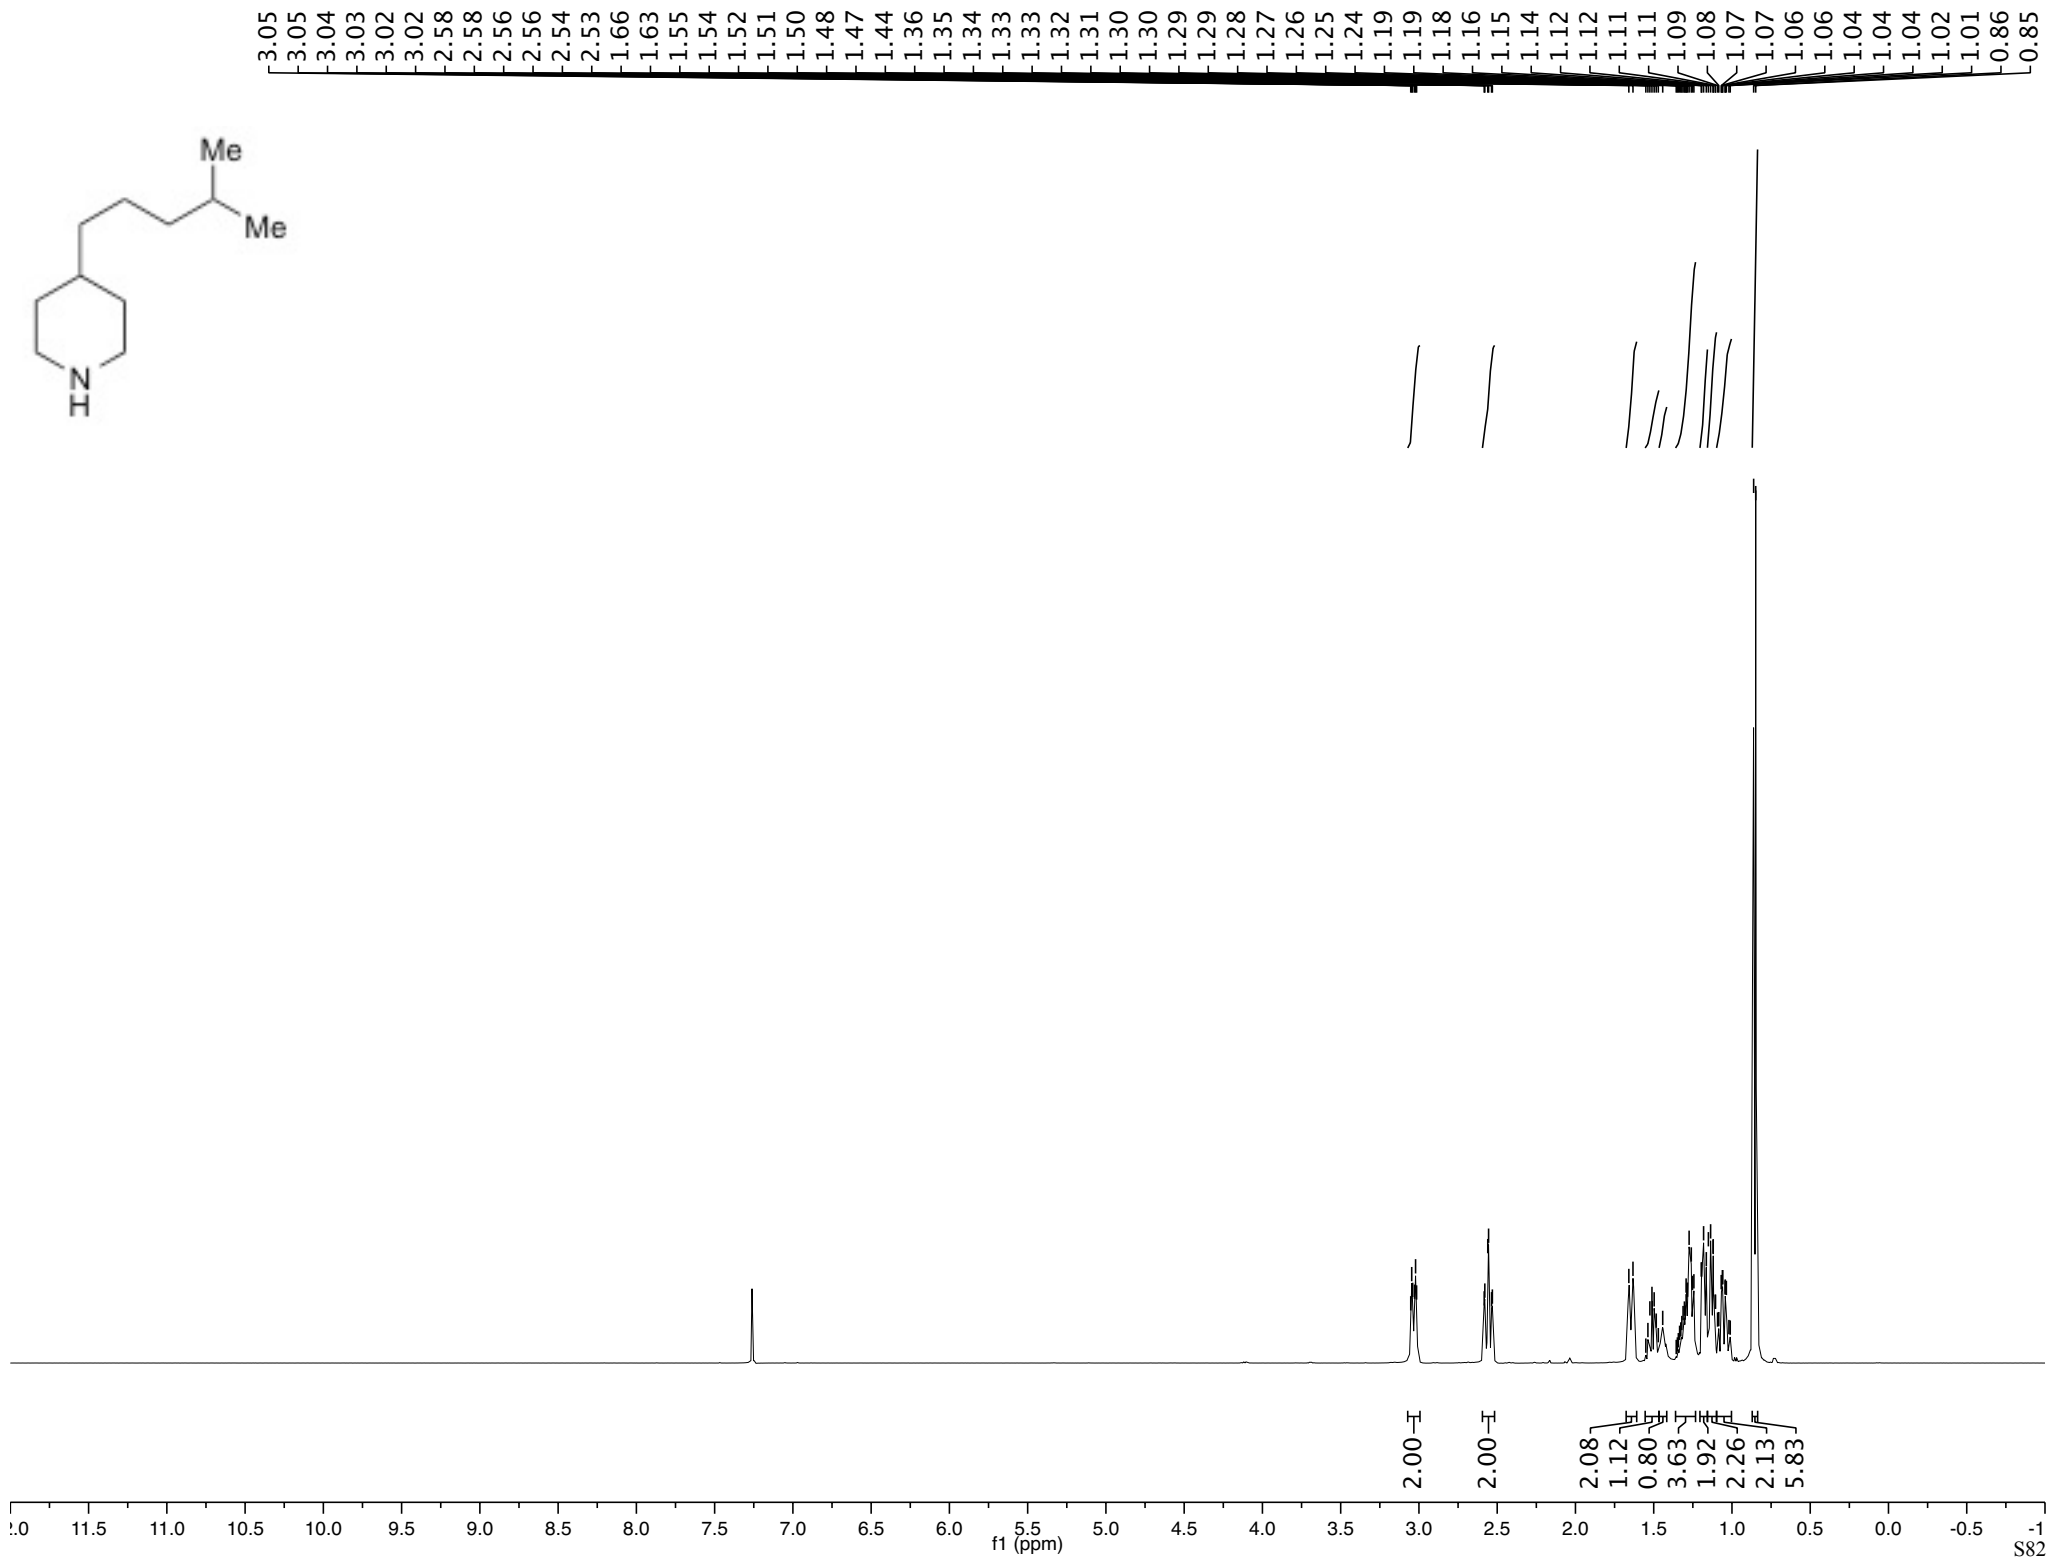

| Parameter              | Value           |
|------------------------|-----------------|
| Origin                 | Varian          |
| Spectrometer           | inova           |
| Solvent                | CDCl3           |
| Temperature            | 20.0            |
| Pulse Sequence         | s2pul           |
| Experiment             | 1D              |
| Probe                  | QUAD            |
| Number of Scans        | 96              |
| Receiver Gain          | 60              |
| Relaxation Delay       | 2.0000          |
| Pulse Width            | 0.0000          |
| Acquisition Time       | 1.0863          |
| Spectrometer Frequency | 125.66          |
| Spectral Width         | 30165.9         |
| Lowest Frequency       | -1271.1         |
| Nucleus                | <sup>13</sup> C |
| Acquired Size          | 32768           |
| Spectral Size          | 65536           |

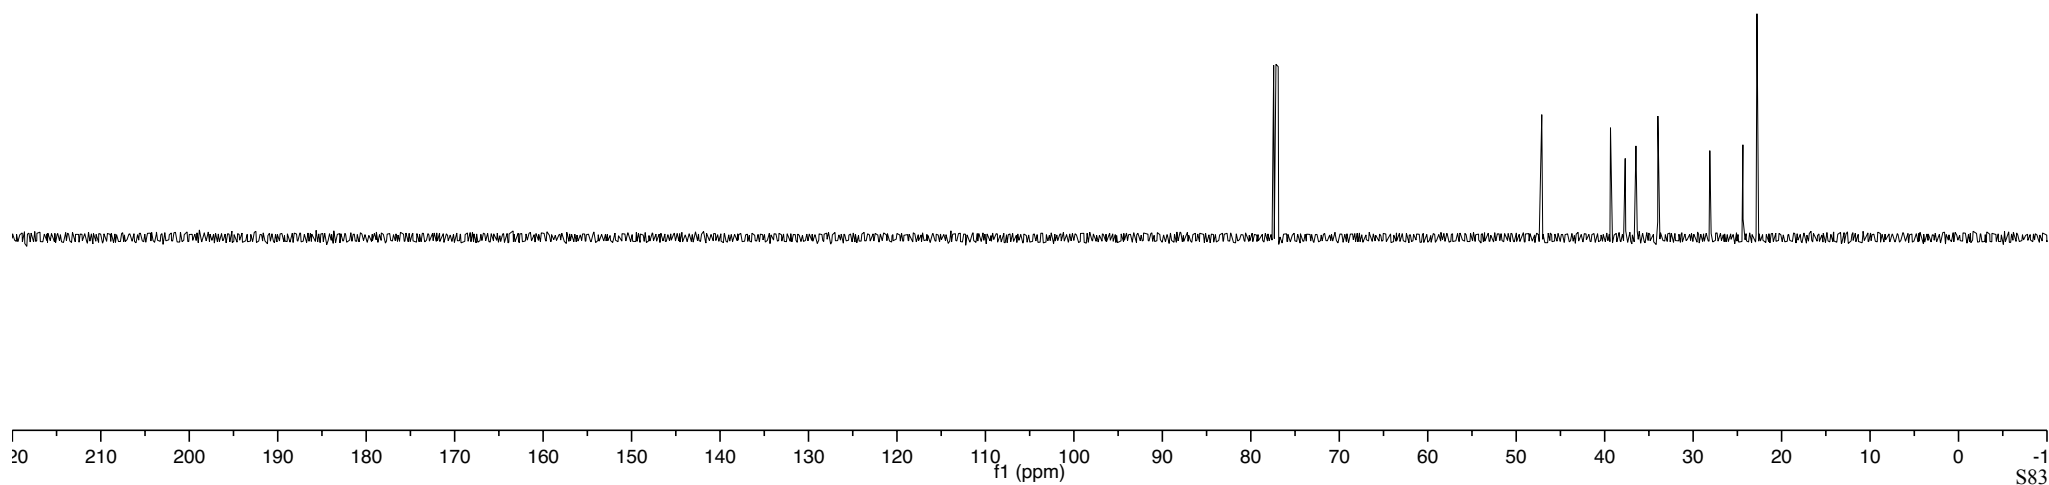

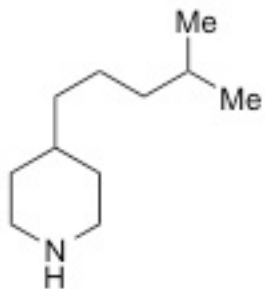

—77.16 CDCl<sub>3</sub>

—47.11  
—39.34  
—37.68  
—36.47  
—33.98  
—28.11  
—24.38  
—22.78

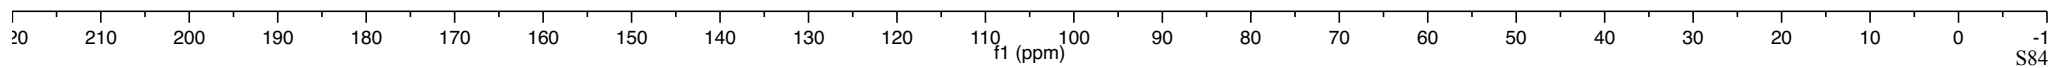

| Parameter              | Value         |
|------------------------|---------------|
| Title                  | JMH-III-32_1H |
| Origin                 | Varian        |
| Spectrometer           | inova         |
| Solvent                | CDCl3         |
| Temperature            | 20.0          |
| Pulse Sequence         | s2pul         |
| Experiment             | 1D            |
| Probe                  | hcn           |
| Number of Scans        | 16            |
| Receiver Gain          | 32            |
| Relaxation Delay       | 2.0000        |
| Pulse Width            | 0.0000        |
| Acquisition Time       | 4.0960        |
| Spectrometer Frequency | 500.07        |
| Spectral Width         | 8000.0        |
| Lowest Frequency       | -1511.1       |
| Nucleus                | 1H            |
| Acquired Size          | 32768         |
| Spectral Size          | 65536         |

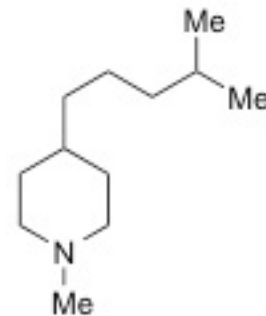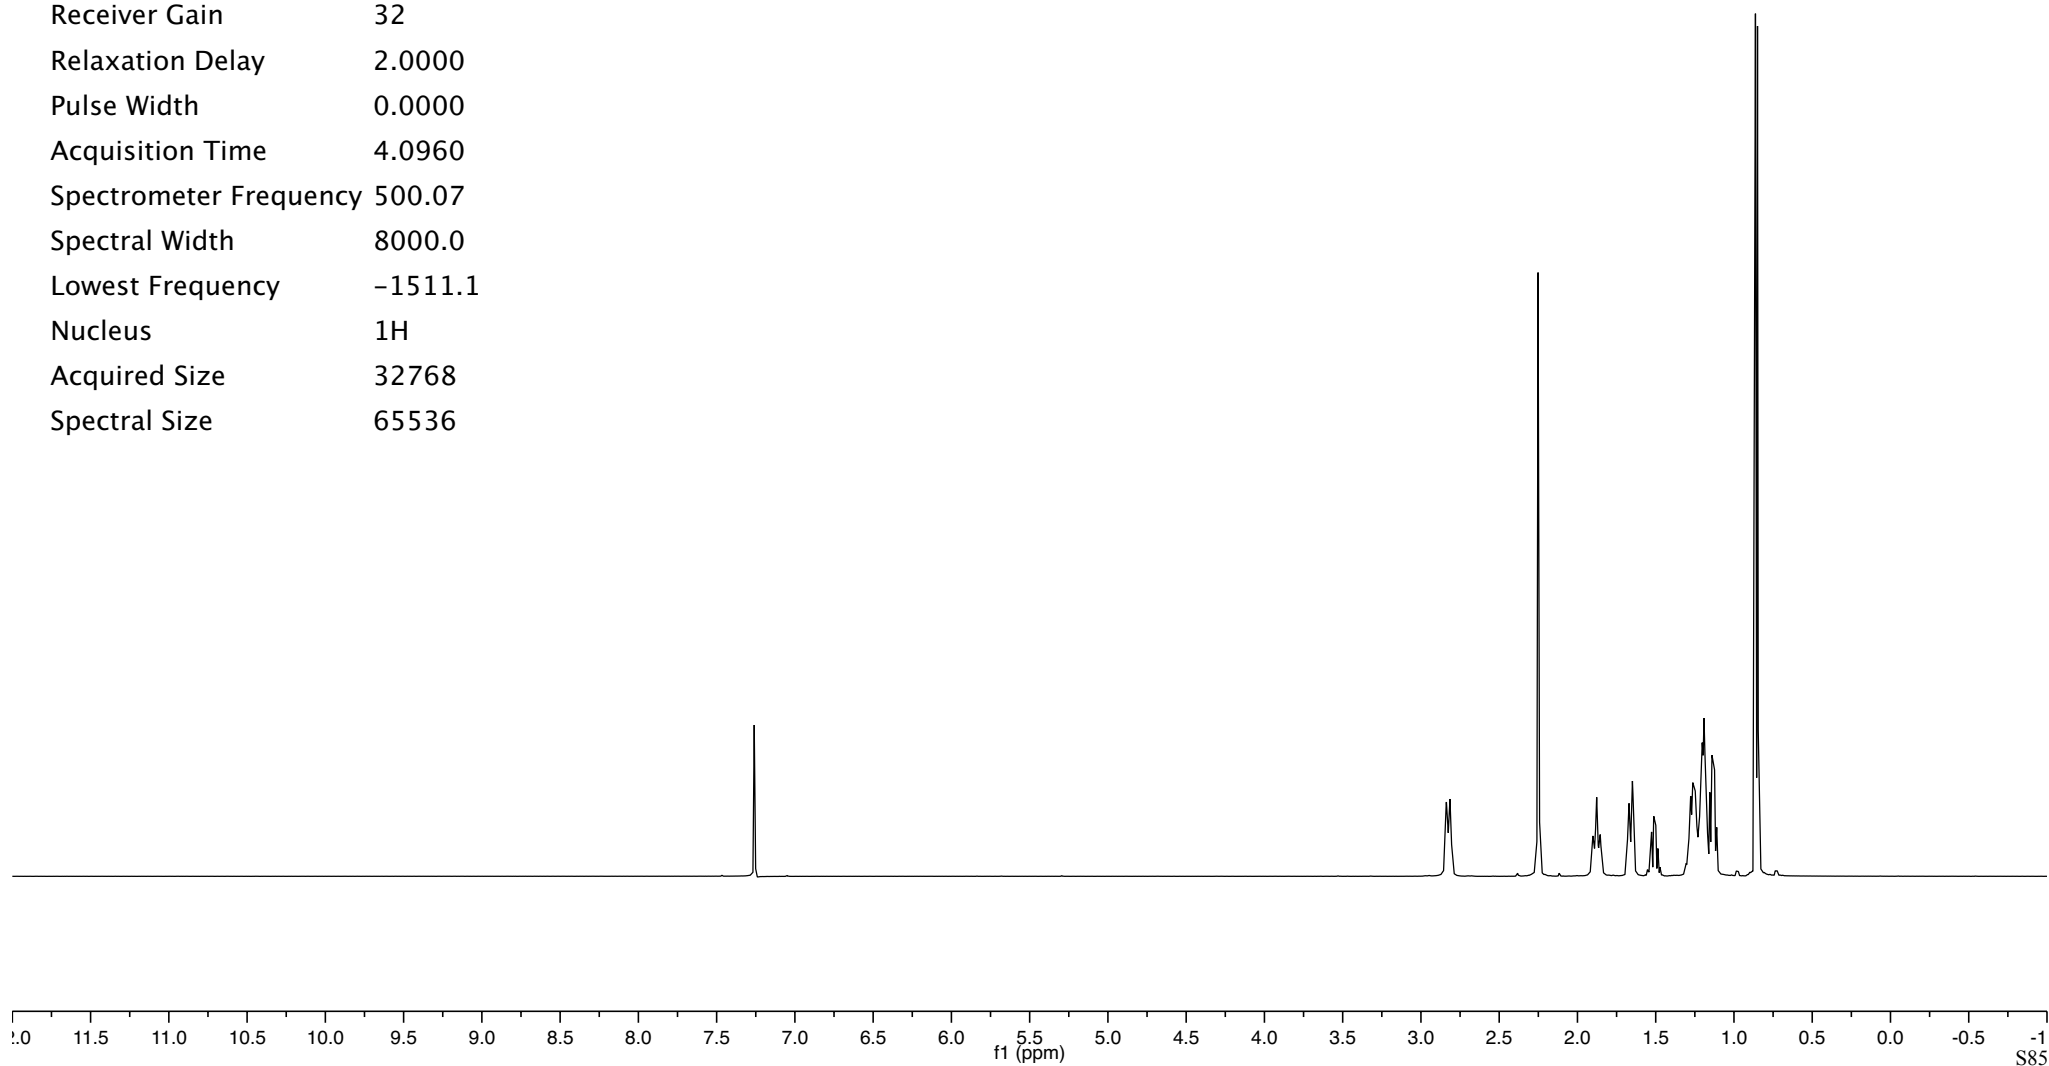

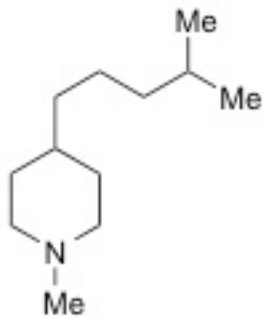

— 7.26 CDCl<sub>3</sub>

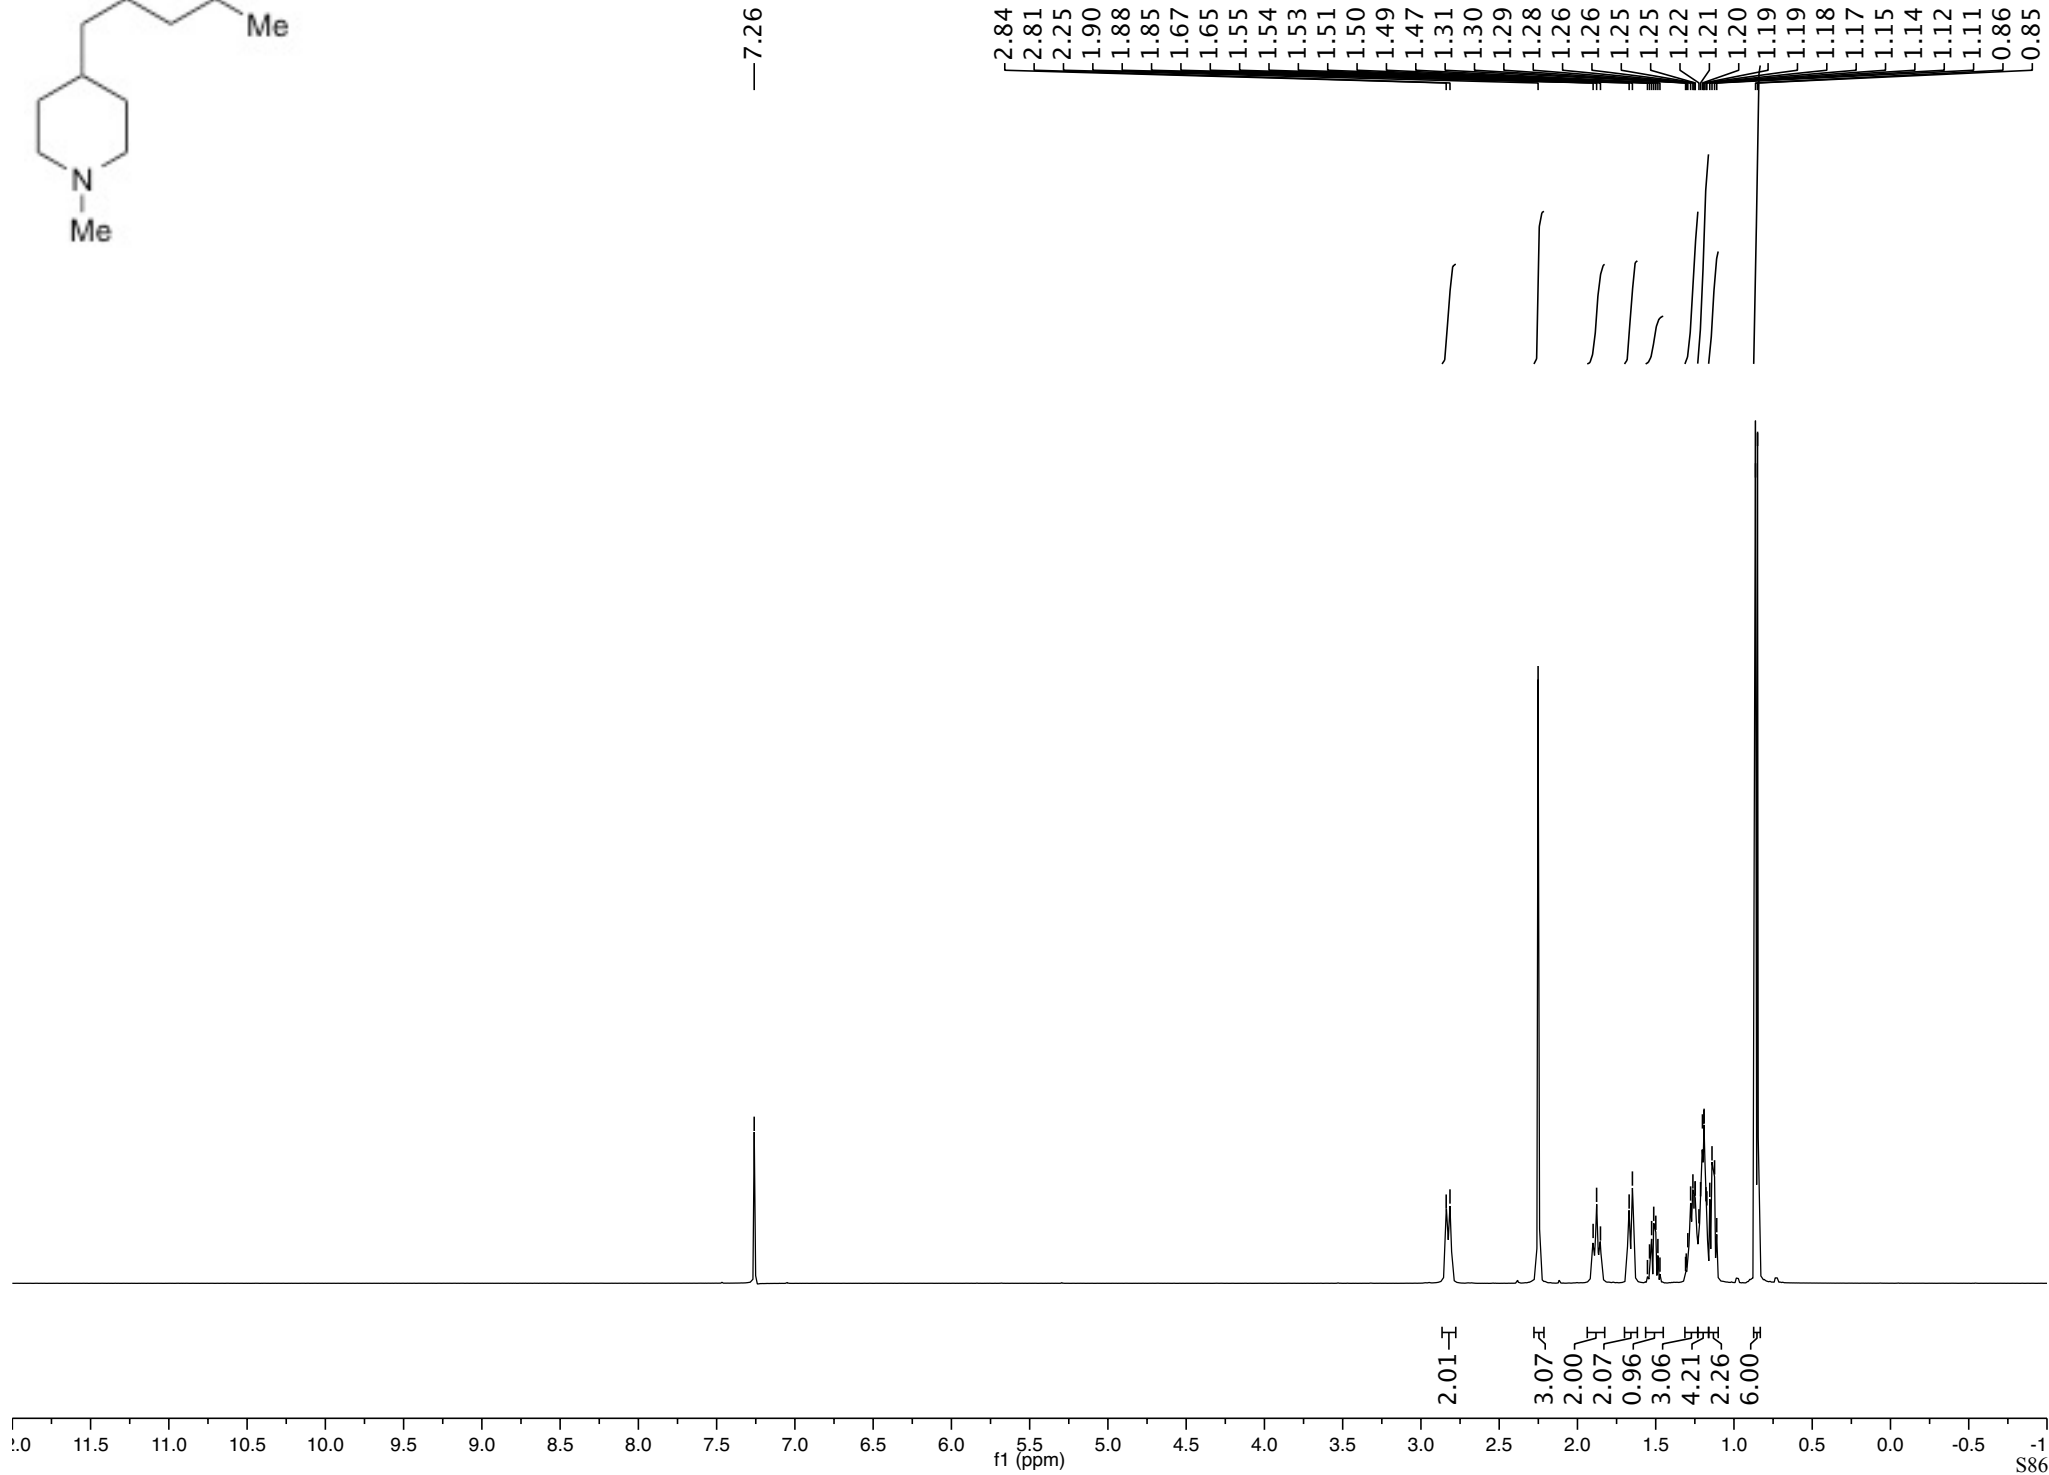

| Parameter              | Value          |
|------------------------|----------------|
| Title                  | JMH-III-22_13C |
| Origin                 | Varian         |
| Spectrometer           | inova          |
| Solvent                | CDCl3          |
| Temperature            | 20.0           |
| Pulse Sequence         | s2pul          |
| Experiment             | 1D             |
| Probe                  | QUAD           |
| Number of Scans        | 192            |
| Receiver Gain          | 60             |
| Relaxation Delay       | 2.0000         |
| Pulse Width            | 0.0000         |
| Acquisition Time       | 1.0863         |
| Spectrometer Frequency | 125.66         |
| Spectral Width         | 30165.9        |
| Lowest Frequency       | -1270.2        |
| Nucleus                | 13C            |
| Acquired Size          | 32768          |
| Spectral Size          | 65536          |

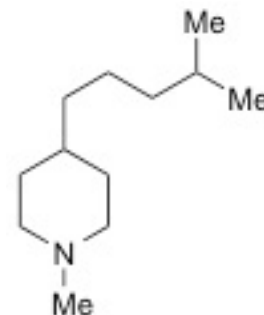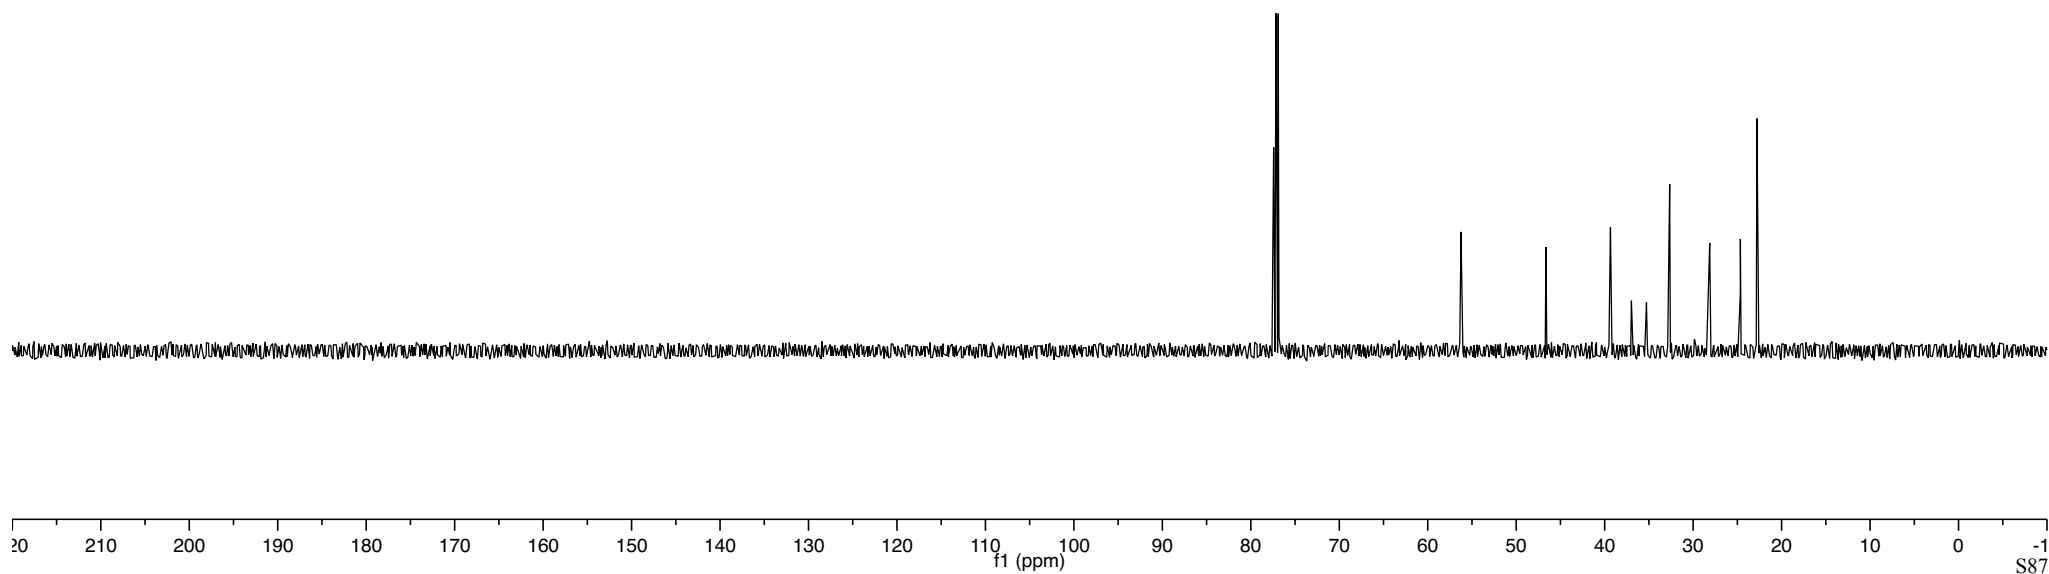



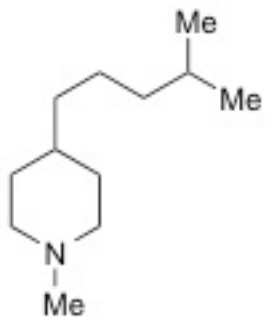

—77.16 CDCl<sub>3</sub>

—56.24

—46.64

—39.35

—36.98

—35.27

—32.65

—28.13

—24.66

—22.79

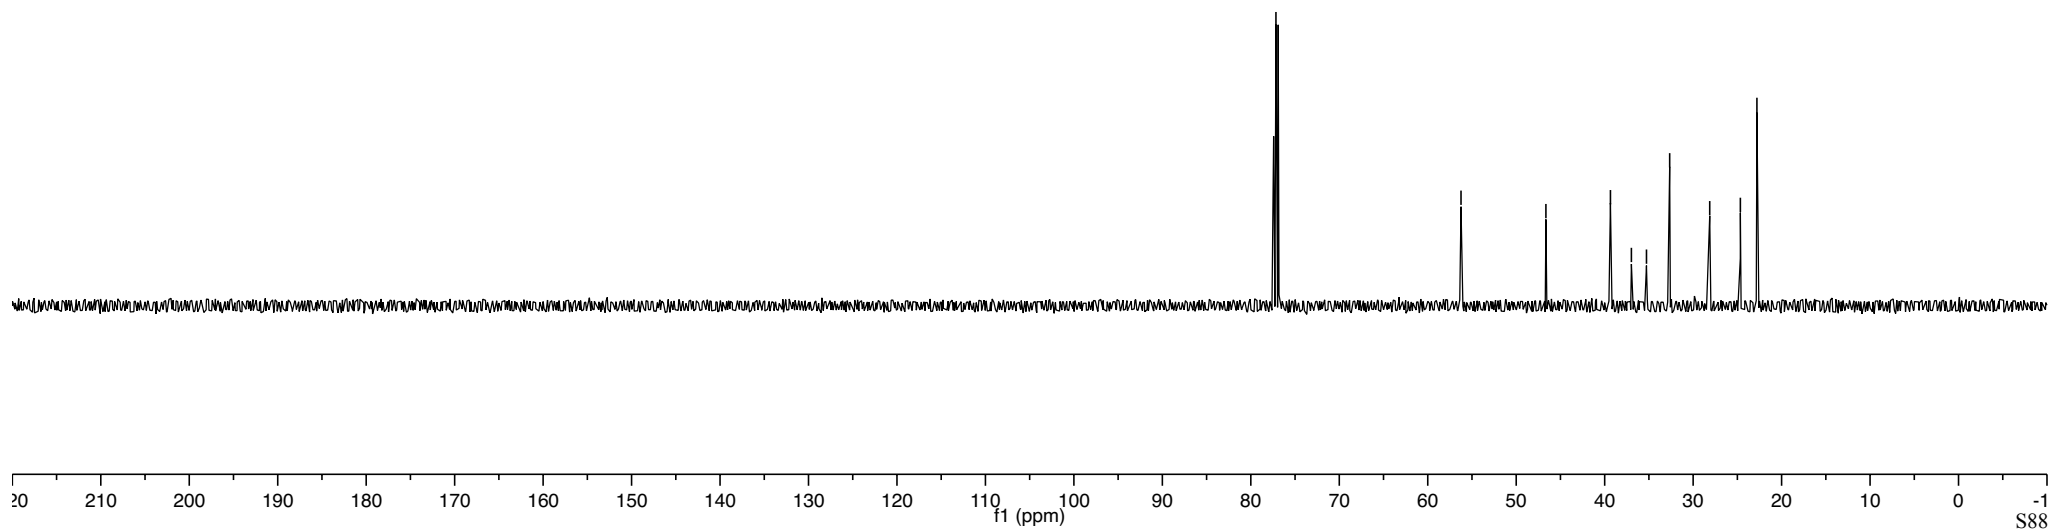

| Parameter              | Value   |
|------------------------|---------|
| Origin                 | Varian  |
| Spectrometer           | inova   |
| Solvent                | CDCl3   |
| Temperature            | 20.0    |
| Pulse Sequence         | s2pul   |
| Experiment             | 1D      |
| Probe                  | hcn     |
| Receiver Gain          | 32      |
| Relaxation Delay       | 0.0000  |
| Pulse Width            | 0.0000  |
| Acquisition Time       | 4.0960  |
| Spectrometer Frequency | 500.07  |
| Spectral Width         | 8000.0  |
| Lowest Frequency       | -1521.6 |
| Nucleus                | 1H      |
| Acquired Size          | 32768   |
| Spectral Size          | 65536   |

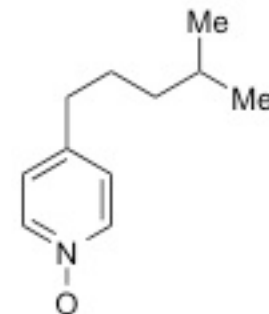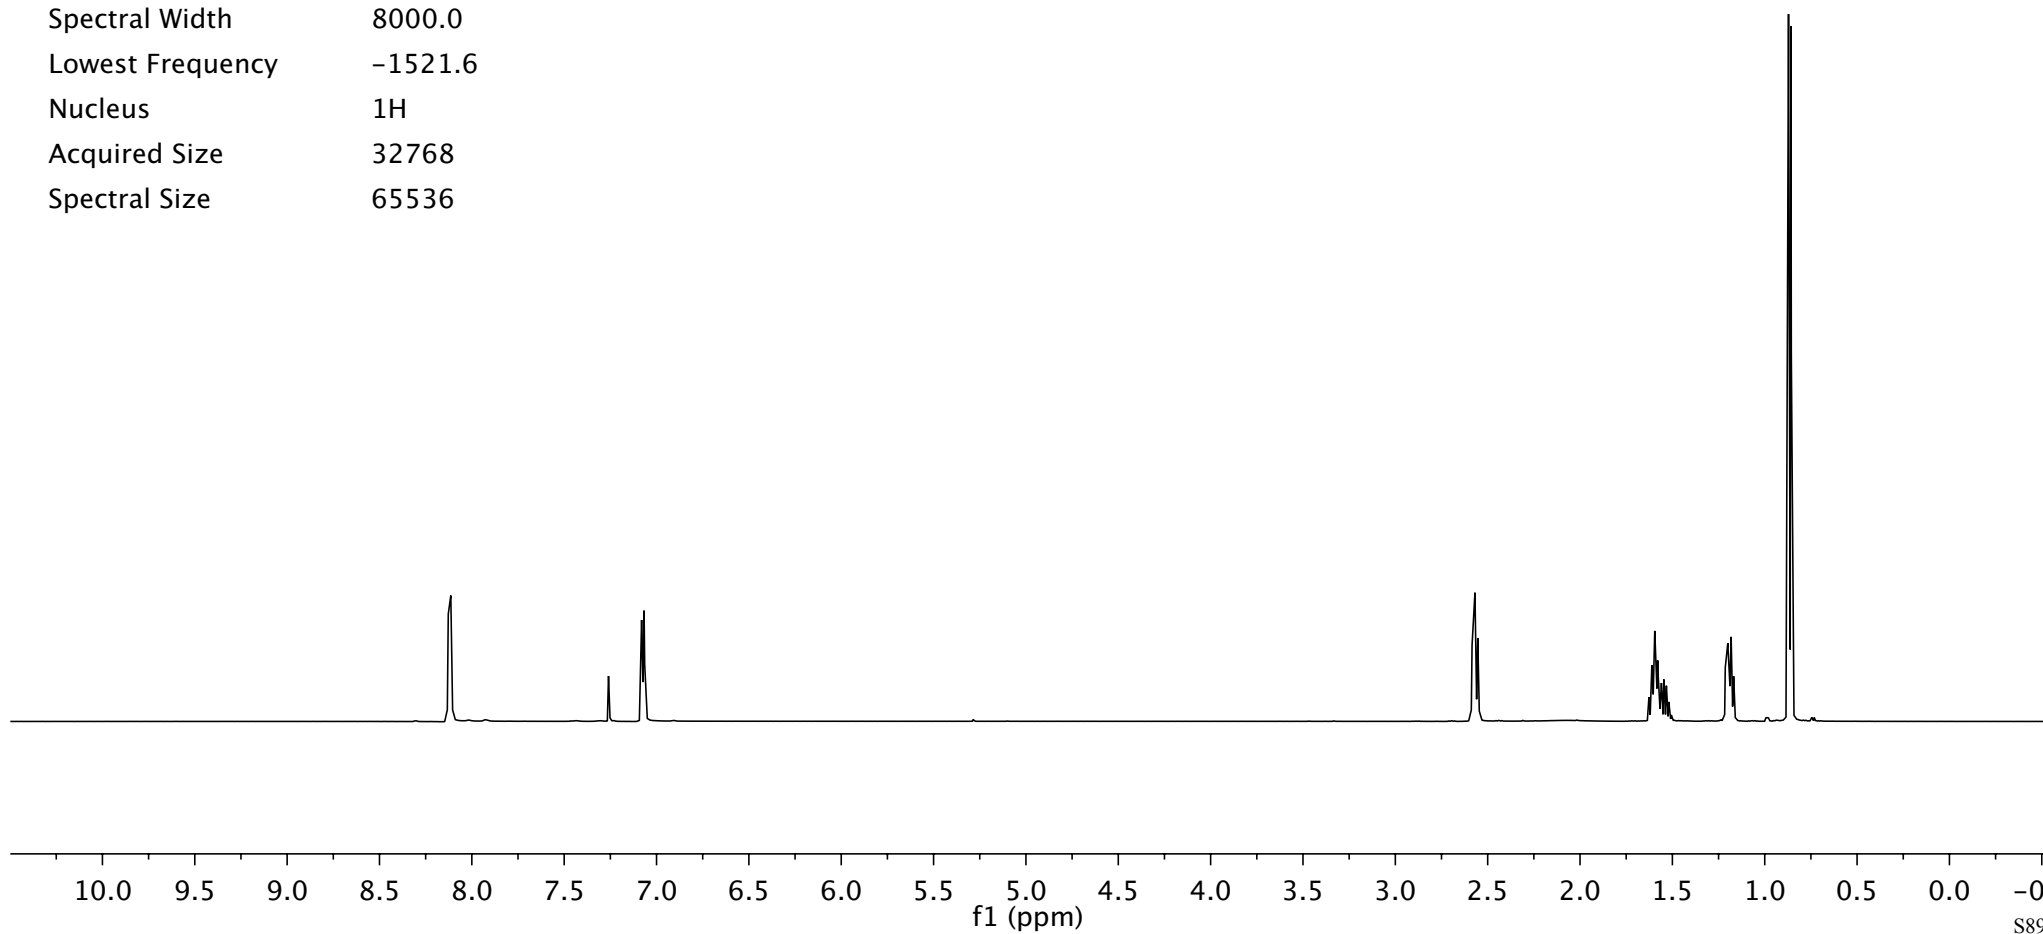

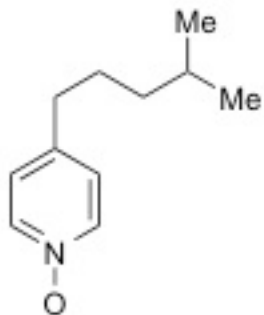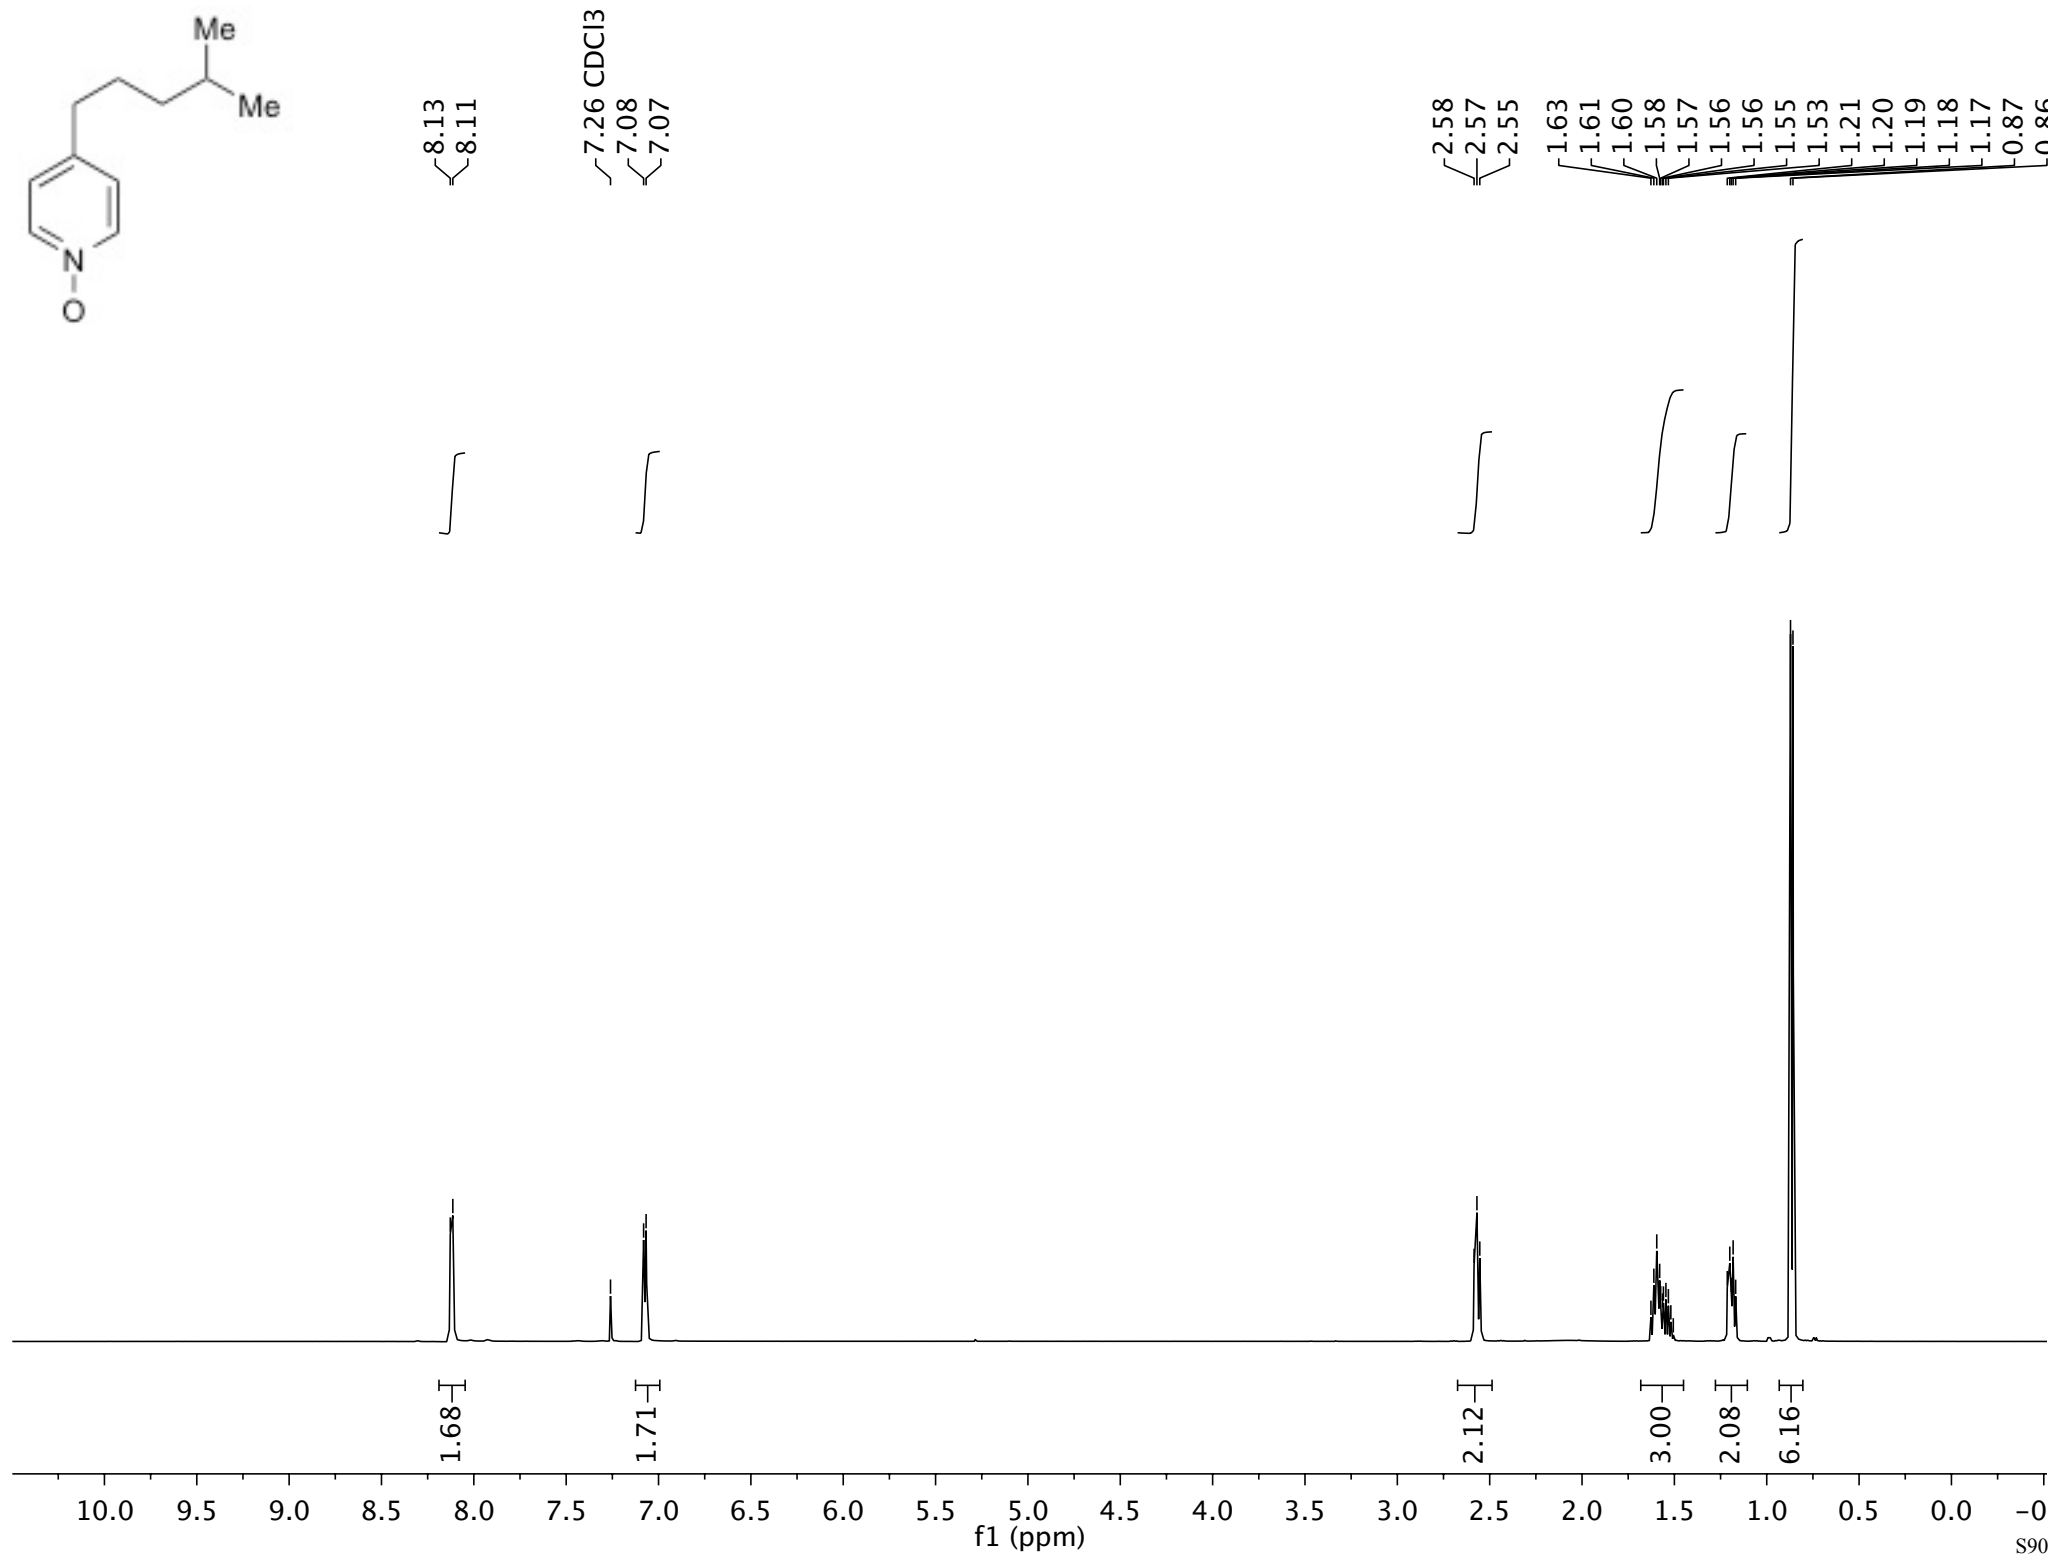

| Parameter              | Value   |
|------------------------|---------|
| Origin                 | Varian  |
| Spectrometer           | inova   |
| Solvent                | CDCl3   |
| Temperature            | 20.0    |
| Pulse Sequence         | s2pul   |
| Experiment             | 1D      |
| Probe                  | quad94  |
| Receiver Gain          | 60      |
| Relaxation Delay       | 2.0000  |
| Pulse Width            | 0.0000  |
| Acquisition Time       | 1.3107  |
| Spectrometer Frequency | 100.58  |
| Spectral Width         | 25000.0 |
| Lowest Frequency       | -1027.7 |
| Nucleus                | 13C     |
| Acquired Size          | 32768   |
| Spectral Size          | 65536   |

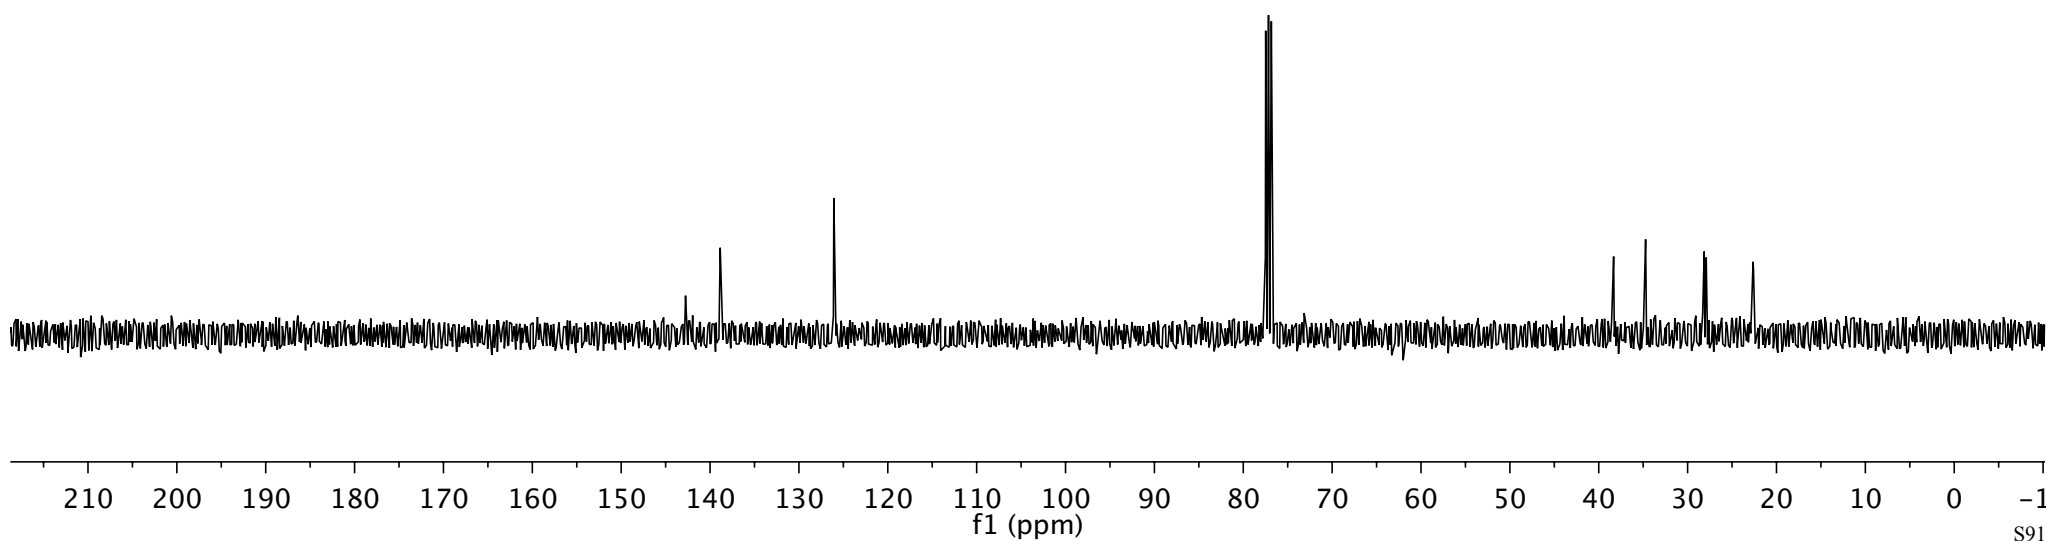



—142.76

—138.87

—126.07

77.48 CDCl<sub>3</sub>

77.16 CDCl<sub>3</sub>

76.84 CDCl<sub>3</sub>

~38.33

~34.73

~28.14

~27.91

~22.63

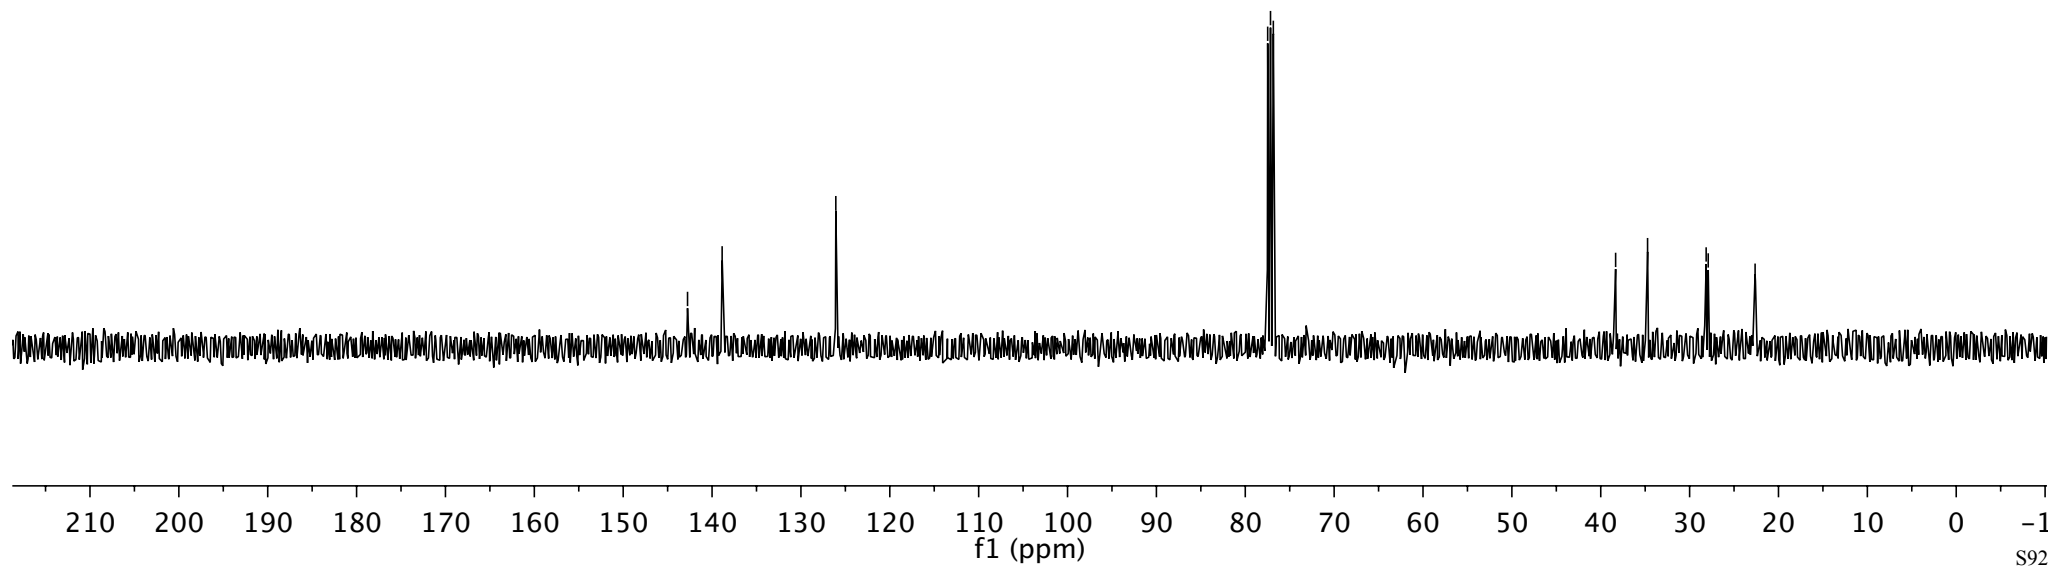

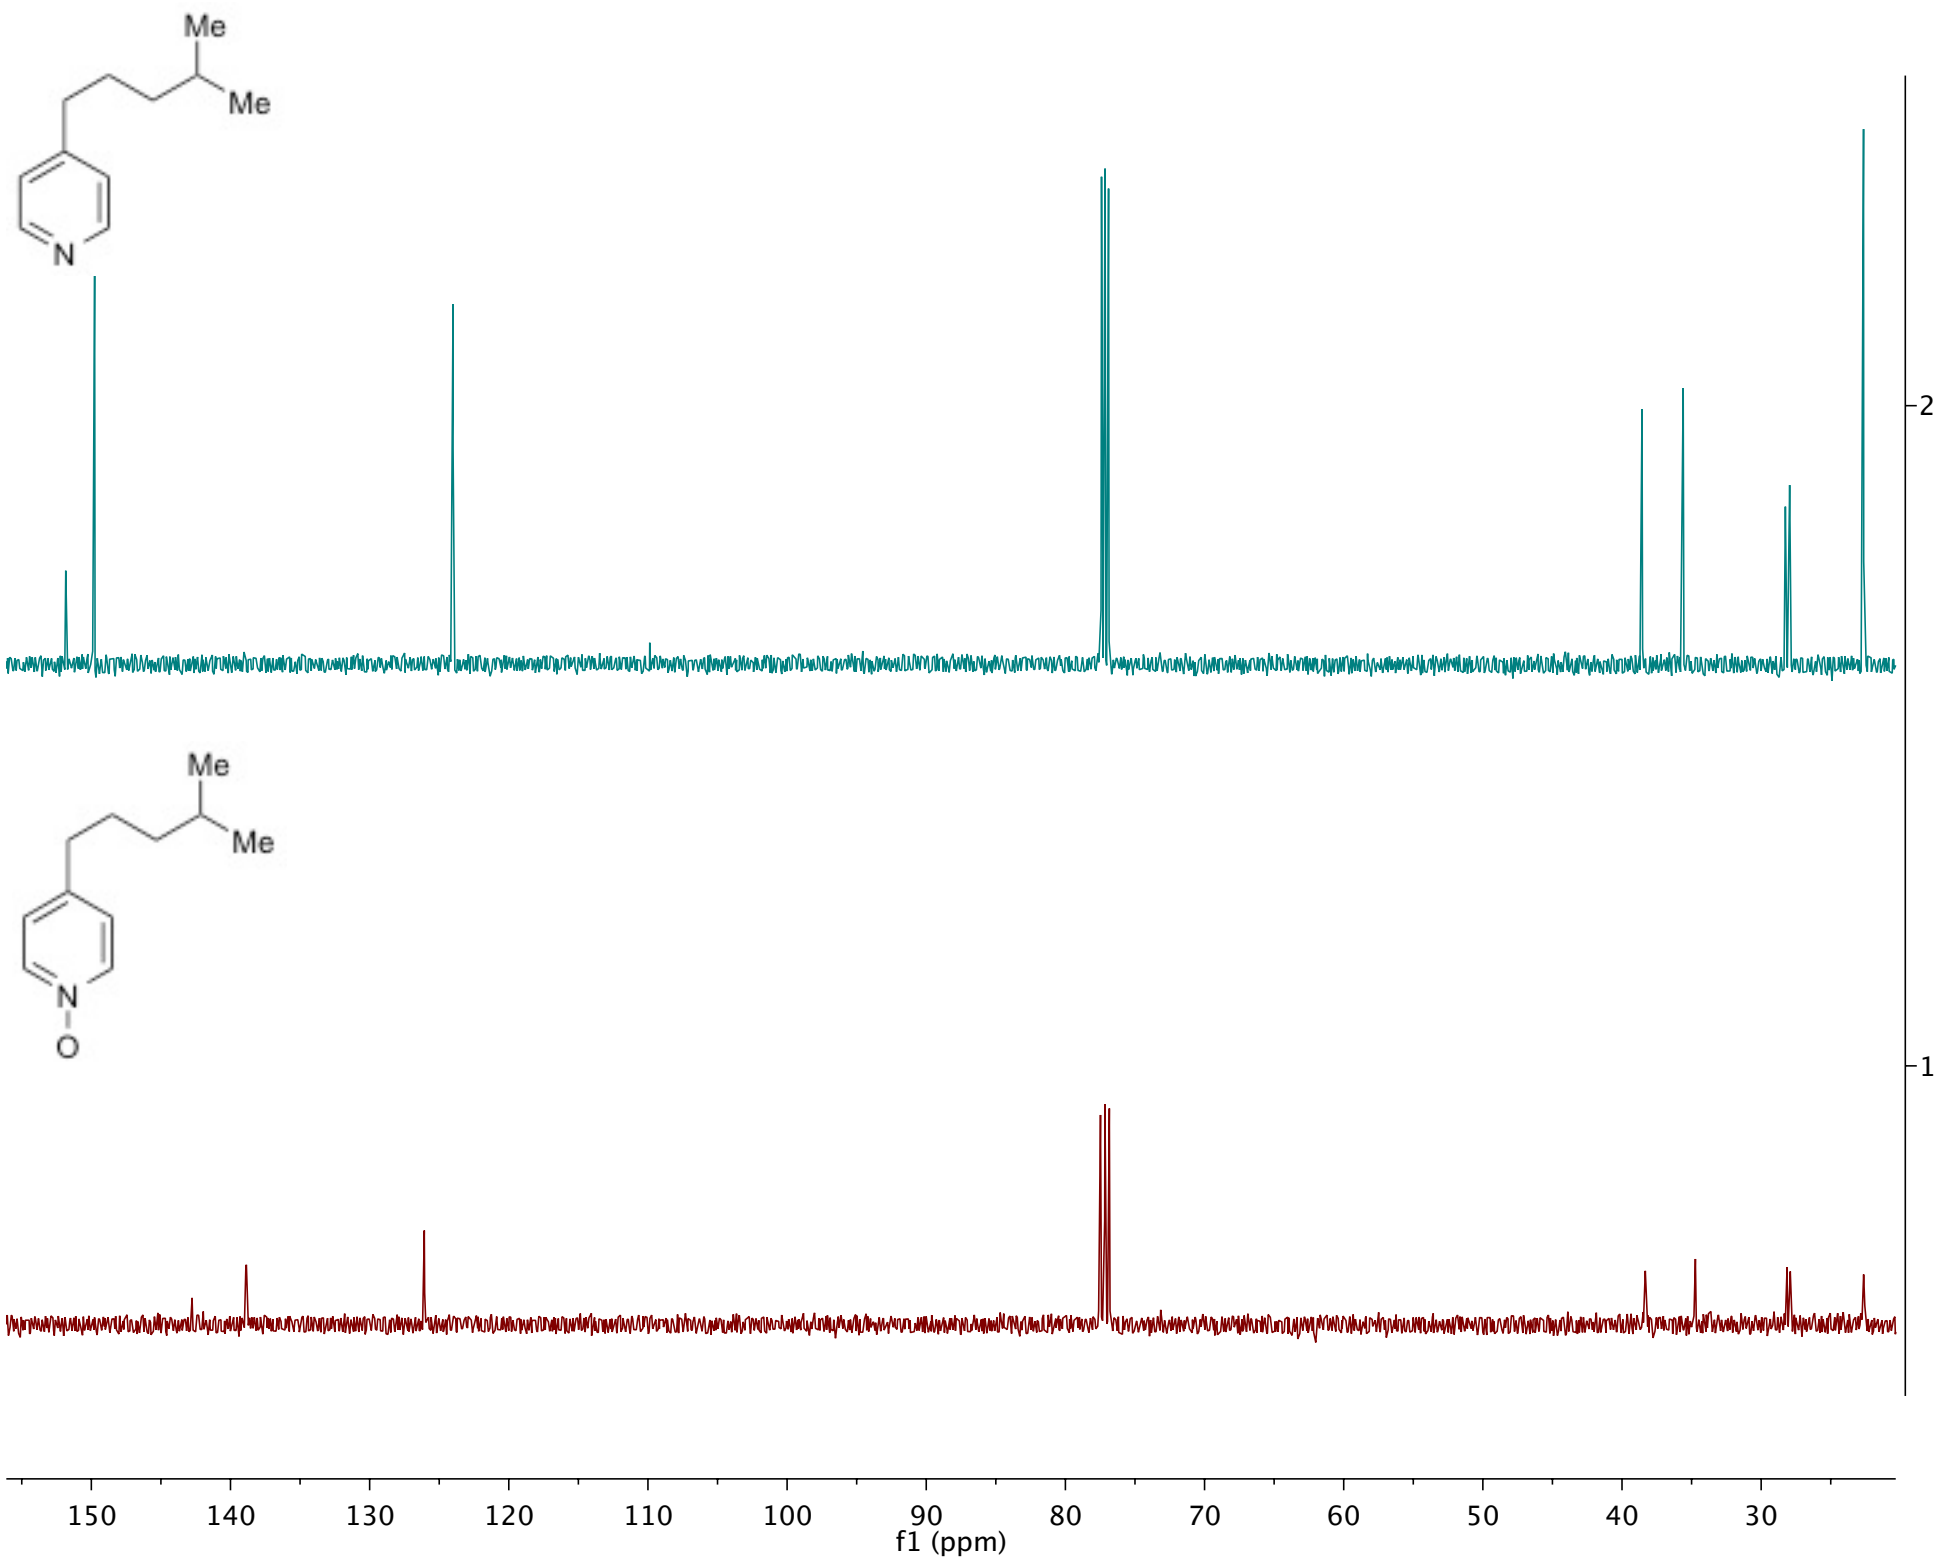

| Parameter              | Value             |
|------------------------|-------------------|
| Origin                 | Varian            |
| Spectrometer           | inova             |
| Solvent                | CDCl <sub>3</sub> |
| Temperature            | 20.0              |
| Pulse Sequence         | s2pul             |
| Experiment             | 1D                |
| Probe                  | hcn               |
| Number of Scans        | 16                |
| Receiver Gain          | 38                |
| Relaxation Delay       | 2.0000            |
| Pulse Width            | 0.0000            |
| Acquisition Time       | 4.0960            |
| Spectrometer Frequency | 500.07            |
| Spectral Width         | 8000.0            |
| Lowest Frequency       | -1521.1           |
| Nucleus                | <sup>1</sup> H    |
| Acquired Size          | 32768             |
| Spectral Size          | 65536             |

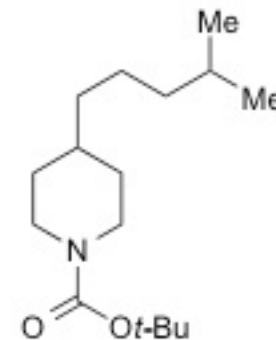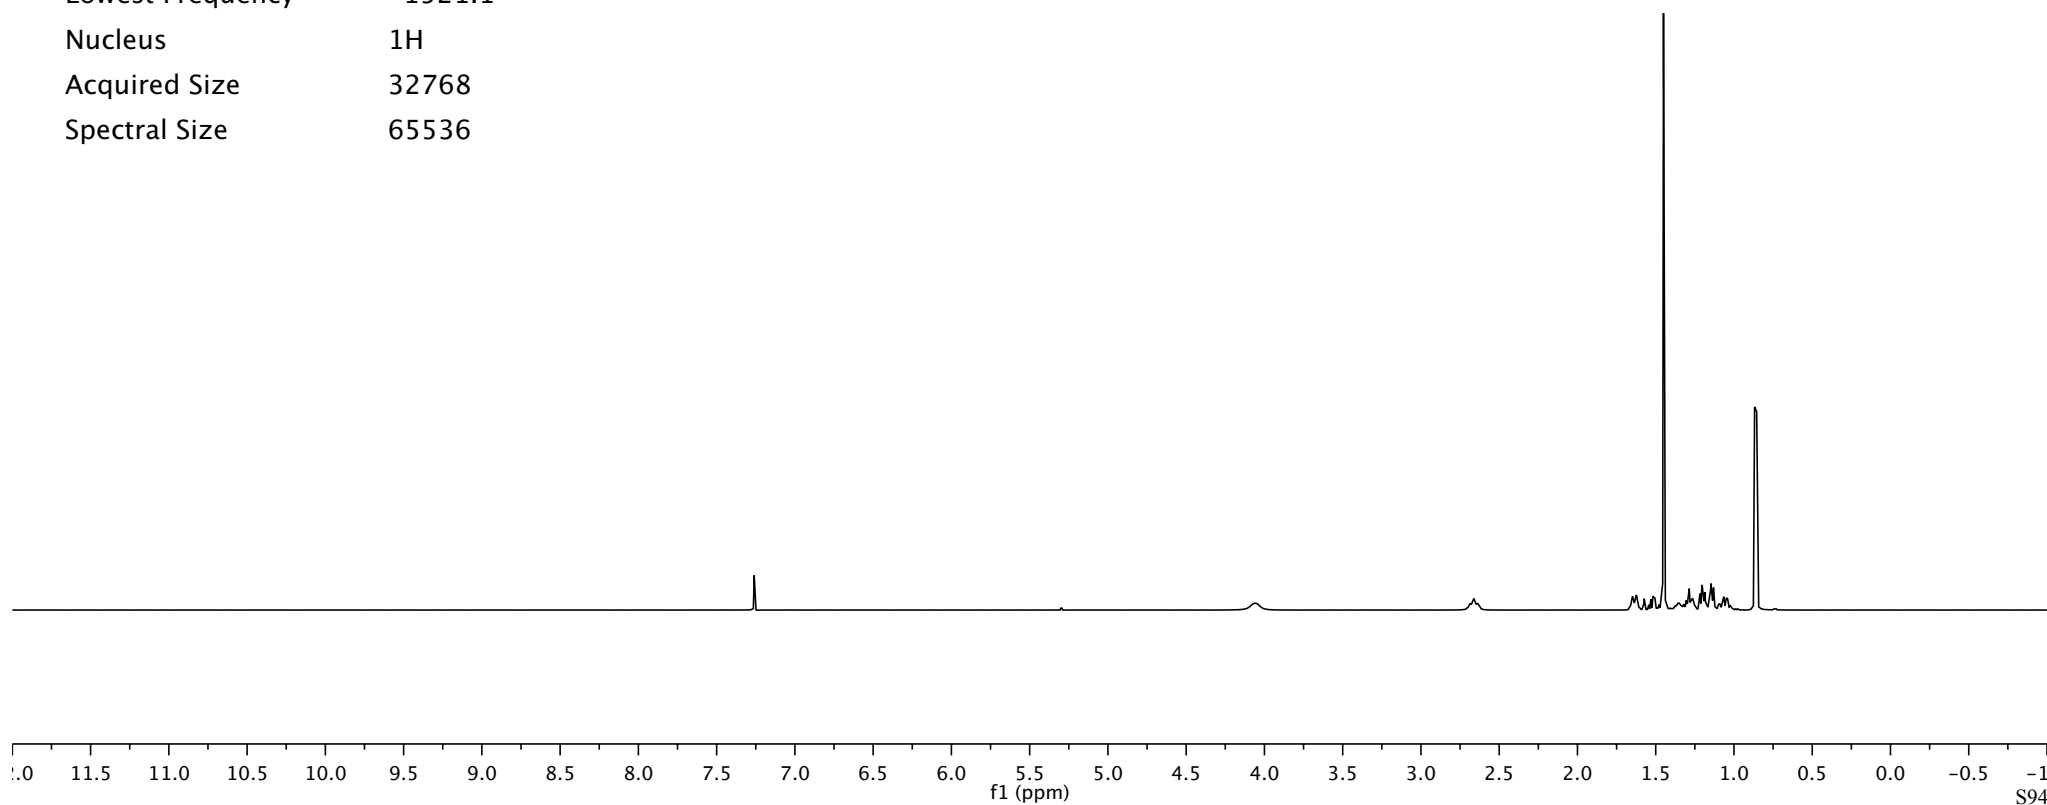

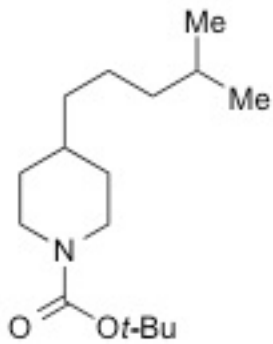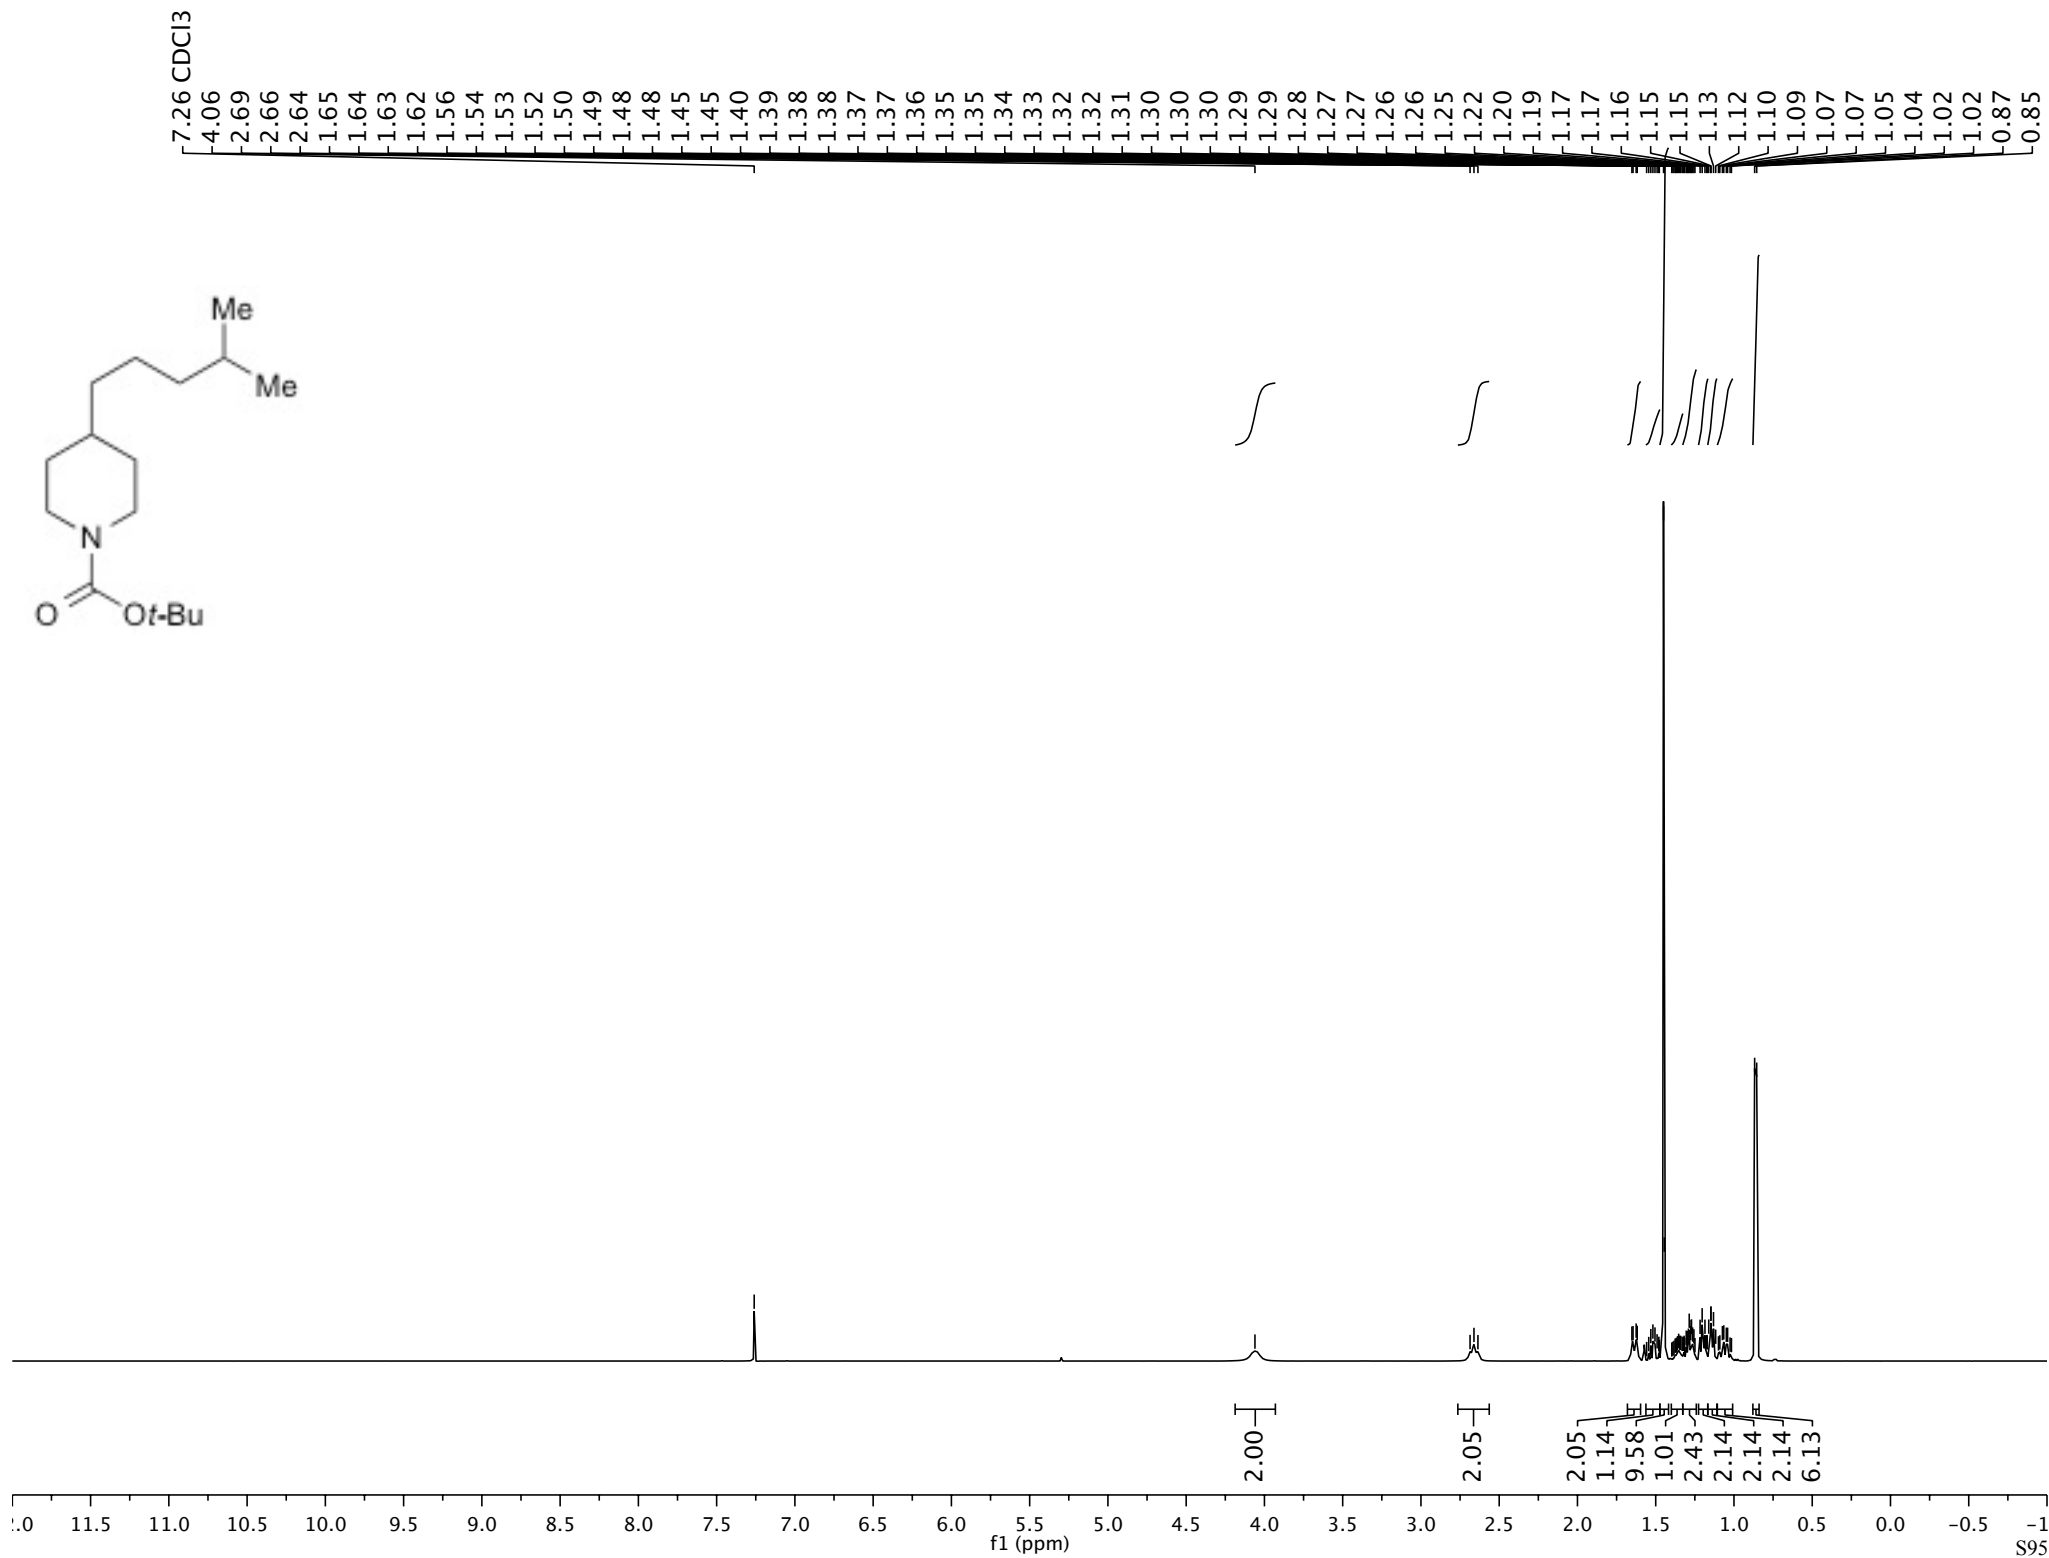



| Parameter              | Value   |
|------------------------|---------|
| Origin                 | Varian  |
| Spectrometer           | inova   |
| Solvent                | CDCl3   |
| Temperature            | 20.0    |
| Pulse Sequence         | s2pul   |
| Experiment             | 1D      |
| Probe                  | QUAD    |
| Number of Scans        | 635     |
| Receiver Gain          | 60      |
| Relaxation Delay       | 2.0000  |
| Pulse Width            | 0.0000  |
| Acquisition Time       | 1.0863  |
| Spectrometer Frequency | 125.66  |
| Spectral Width         | 30165.9 |
| Lowest Frequency       | -1272.7 |
| Nucleus                | 13C     |
| Acquired Size          | 32768   |
| Spectral Size          | 65536   |

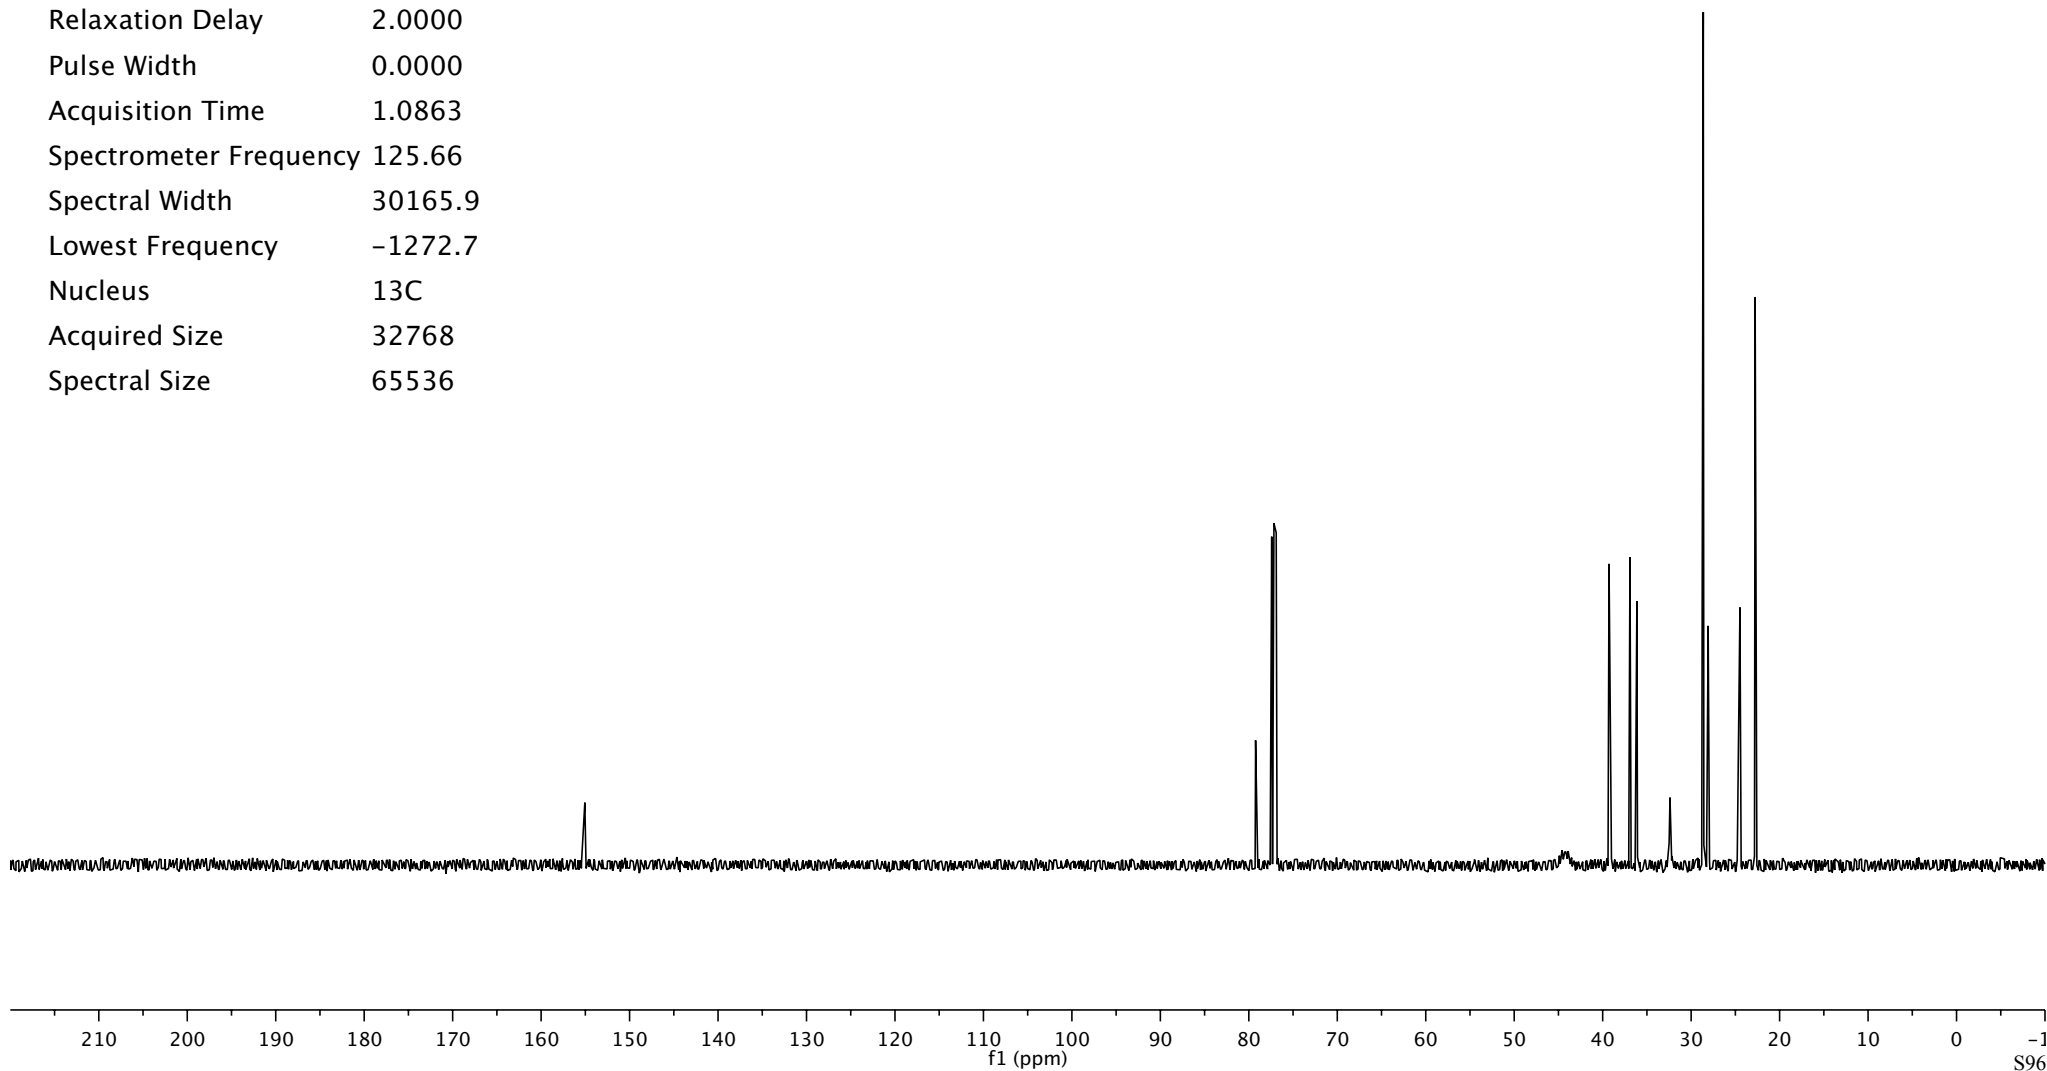

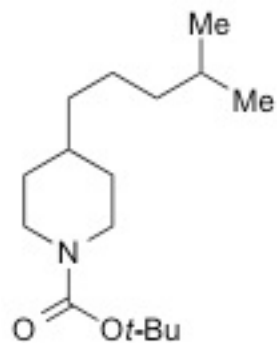

—155.06

~79.23  
~77.16 CDCl<sub>3</sub>

39.28  
36.92  
36.13  
32.39  
28.63  
28.08  
24.49  
22.76

44.27

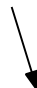

210 200 190 180 170 160 150 140 130 120 110 100 90 80 70 60 50 40 30 20 10 0 -1  
f1 (ppm) S97

| Parameter              | Value             |
|------------------------|-------------------|
| Origin                 | Varian            |
| Spectrometer           | inova             |
| Solvent                | CDCl <sub>3</sub> |
| Temperature            | 20.0              |
| Pulse Sequence         | s2pul             |
| Experiment             | 1D                |
| Probe                  | QUADG             |
| Number of Scans        | 16                |
| Receiver Gain          | 54                |
| Relaxation Delay       | 2.0000            |
| Pulse Width            | 0.0000            |
| Acquisition Time       | 4.0960            |
| Spectrometer Frequency | 499.43            |
| Spectral Width         | 8000.0            |
| Lowest Frequency       | -1518.7           |
| Nucleus                | <sup>1</sup> H    |
| Acquired Size          | 32768             |
| Spectral Size          | 65536             |

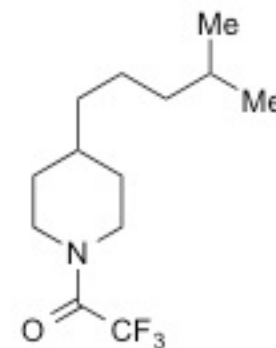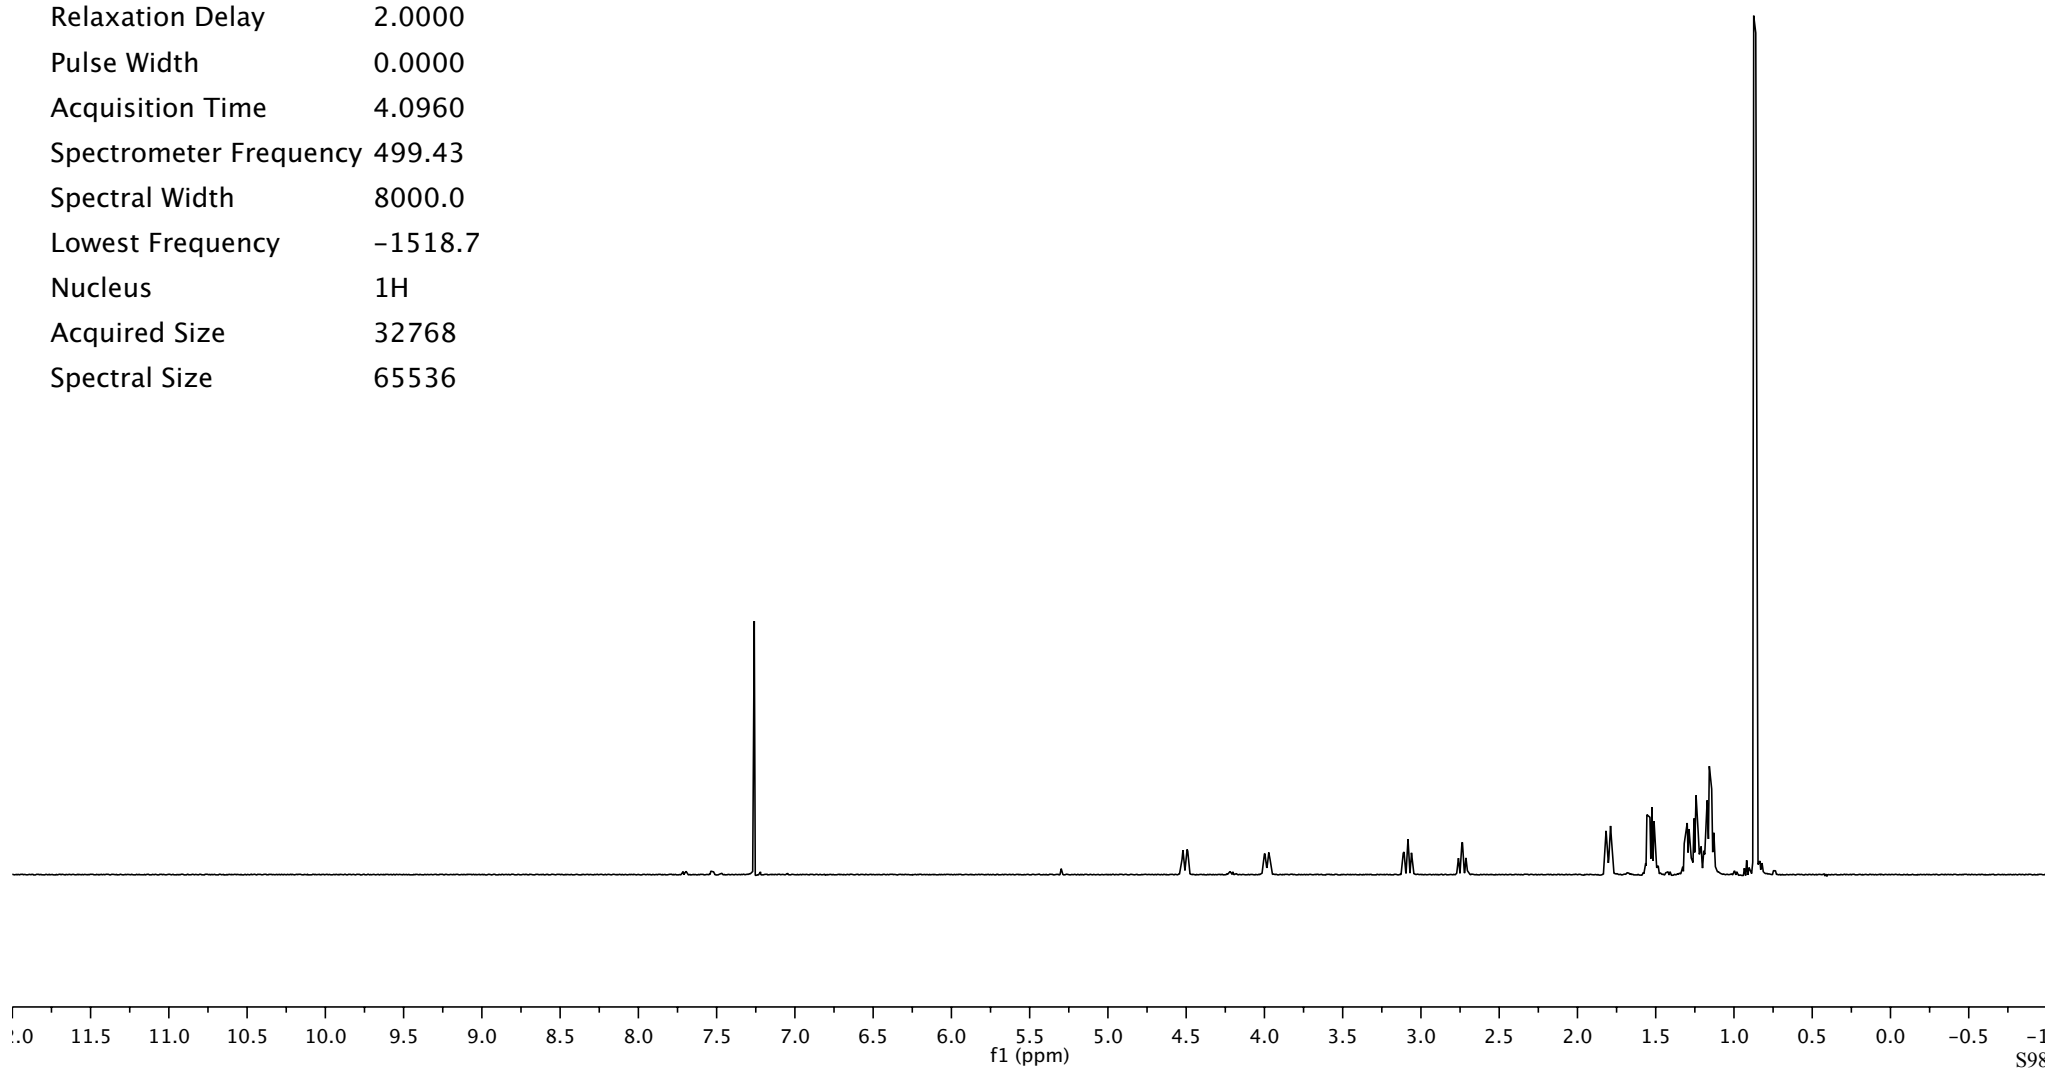

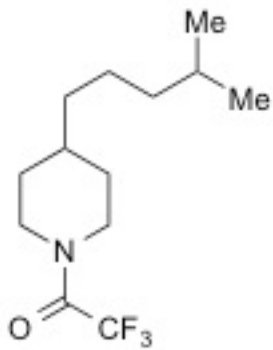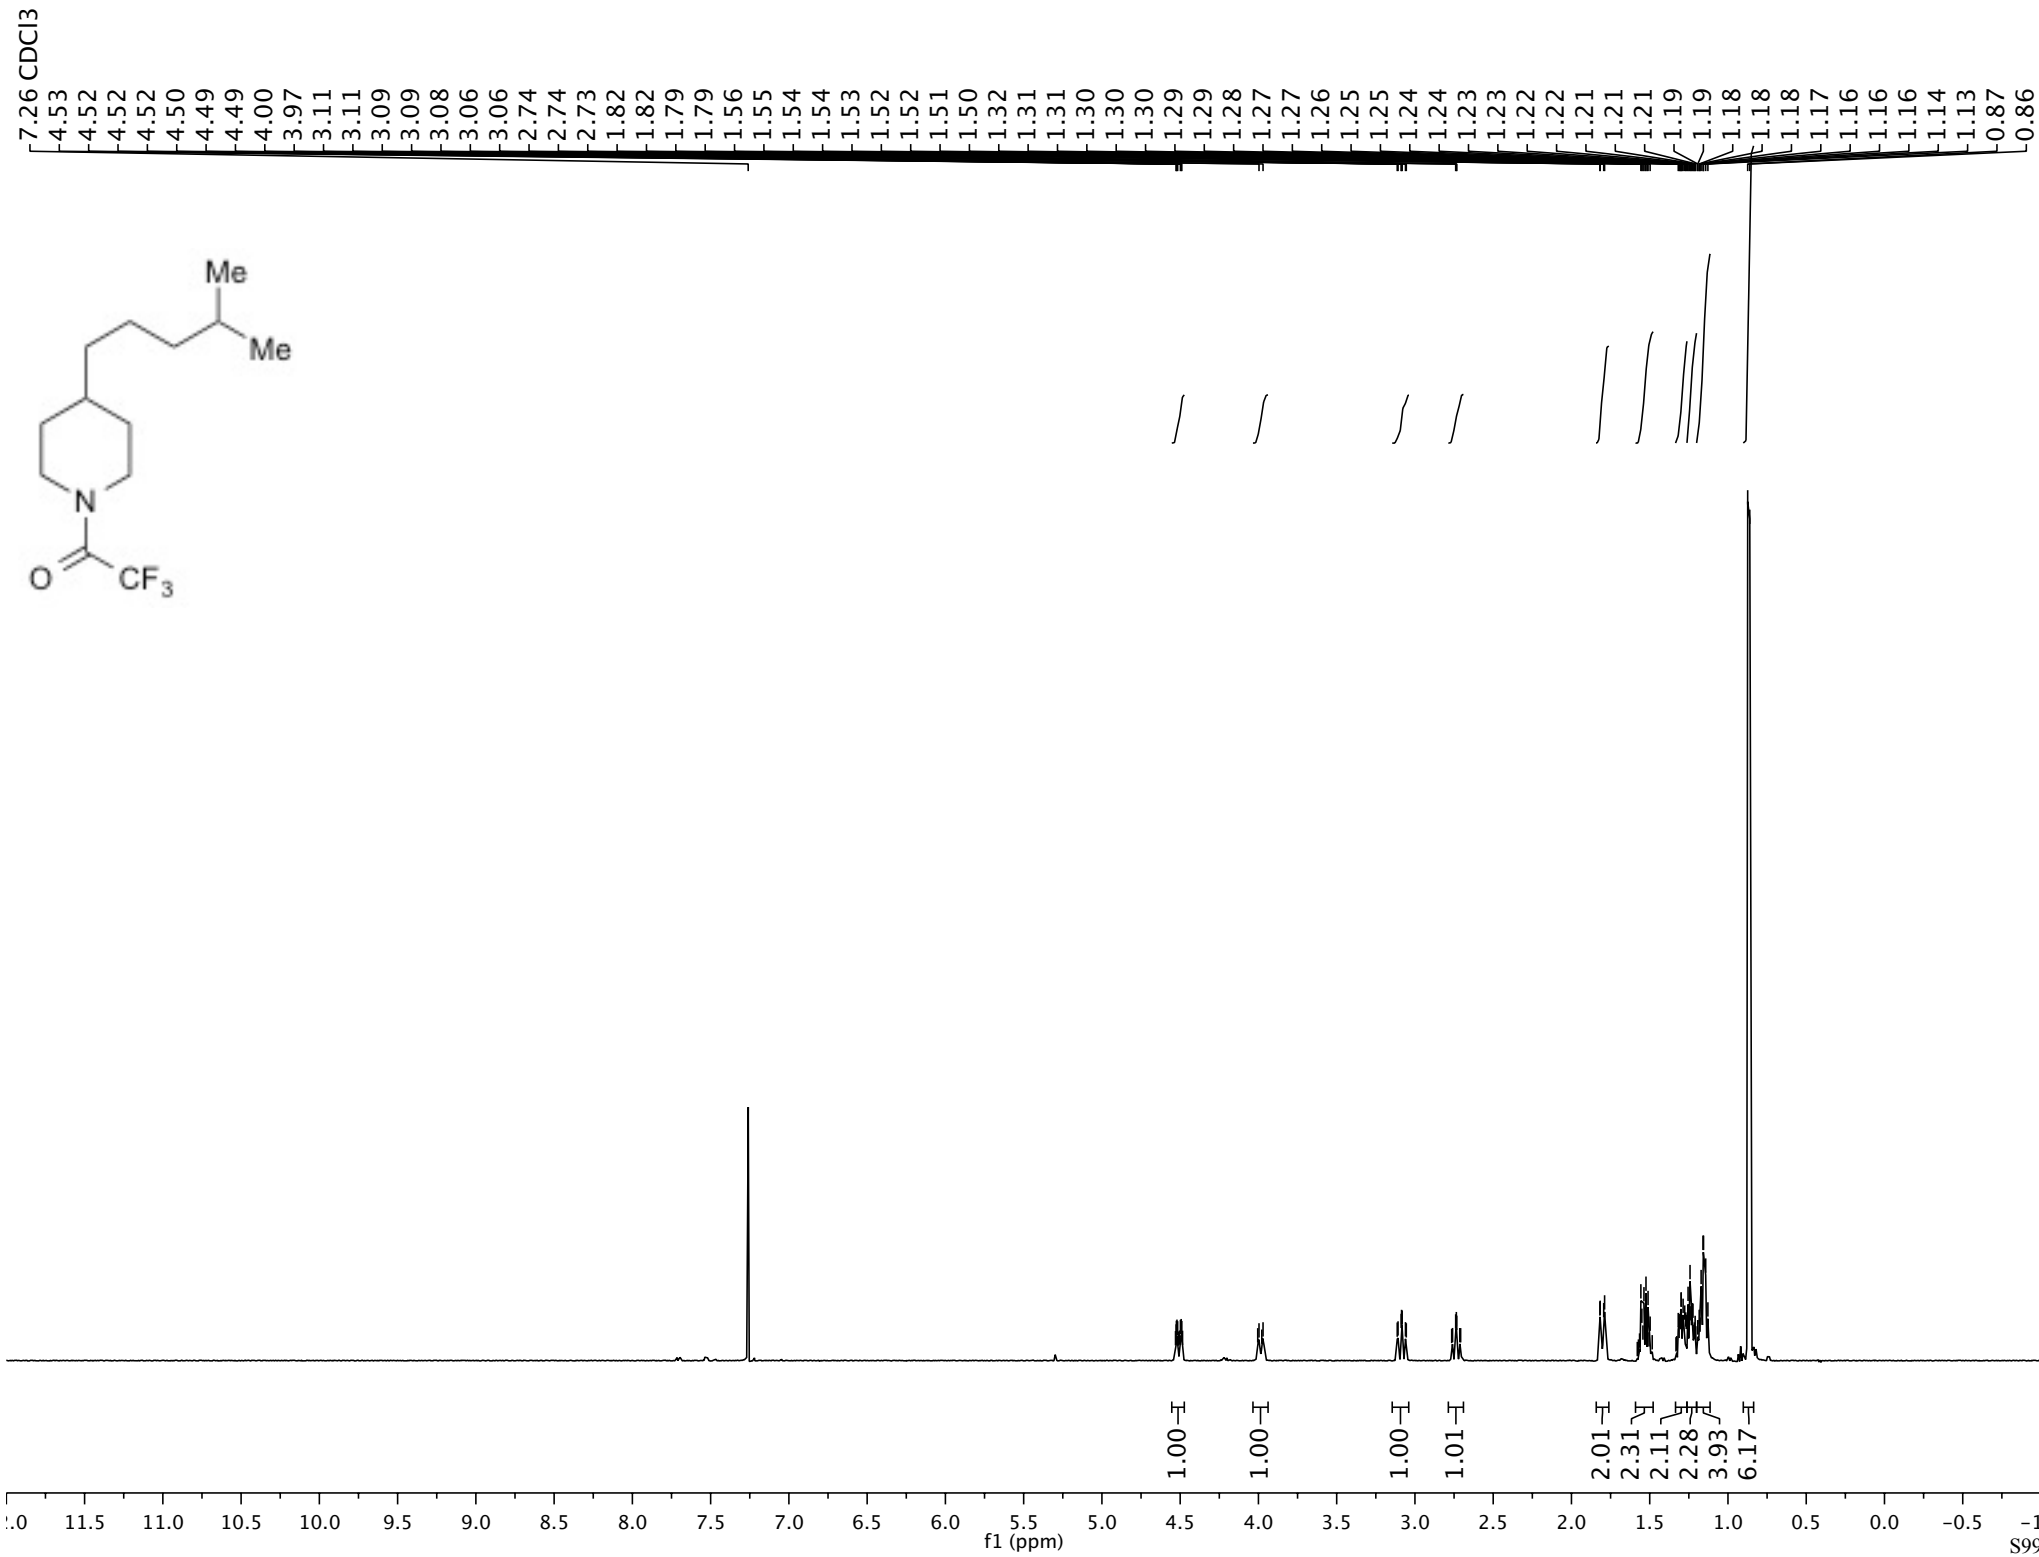

| Parameter              | Value             |
|------------------------|-------------------|
| Origin                 | Varian            |
| Spectrometer           | inova             |
| Solvent                | CDCl <sub>3</sub> |
| Temperature            | 20.0              |
| Pulse Sequence         | s2pul             |
| Experiment             | 1D                |
| Probe                  | QUAD              |
| Number of Scans        | 132               |
| Receiver Gain          | 60                |
| Relaxation Delay       | 0.0000            |
| Pulse Width            | 0.0000            |
| Acquisition Time       | 0.3277            |
| Spectrometer Frequency | 470.15            |
| Spectral Width         | 100000.0          |
| Lowest Frequency       | -79501.3          |
| Nucleus                | <sup>19</sup> F   |
| Acquired Size          | 32768             |
| Spectral Size          | 65536             |

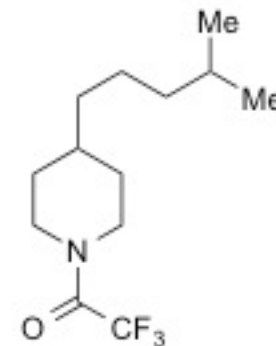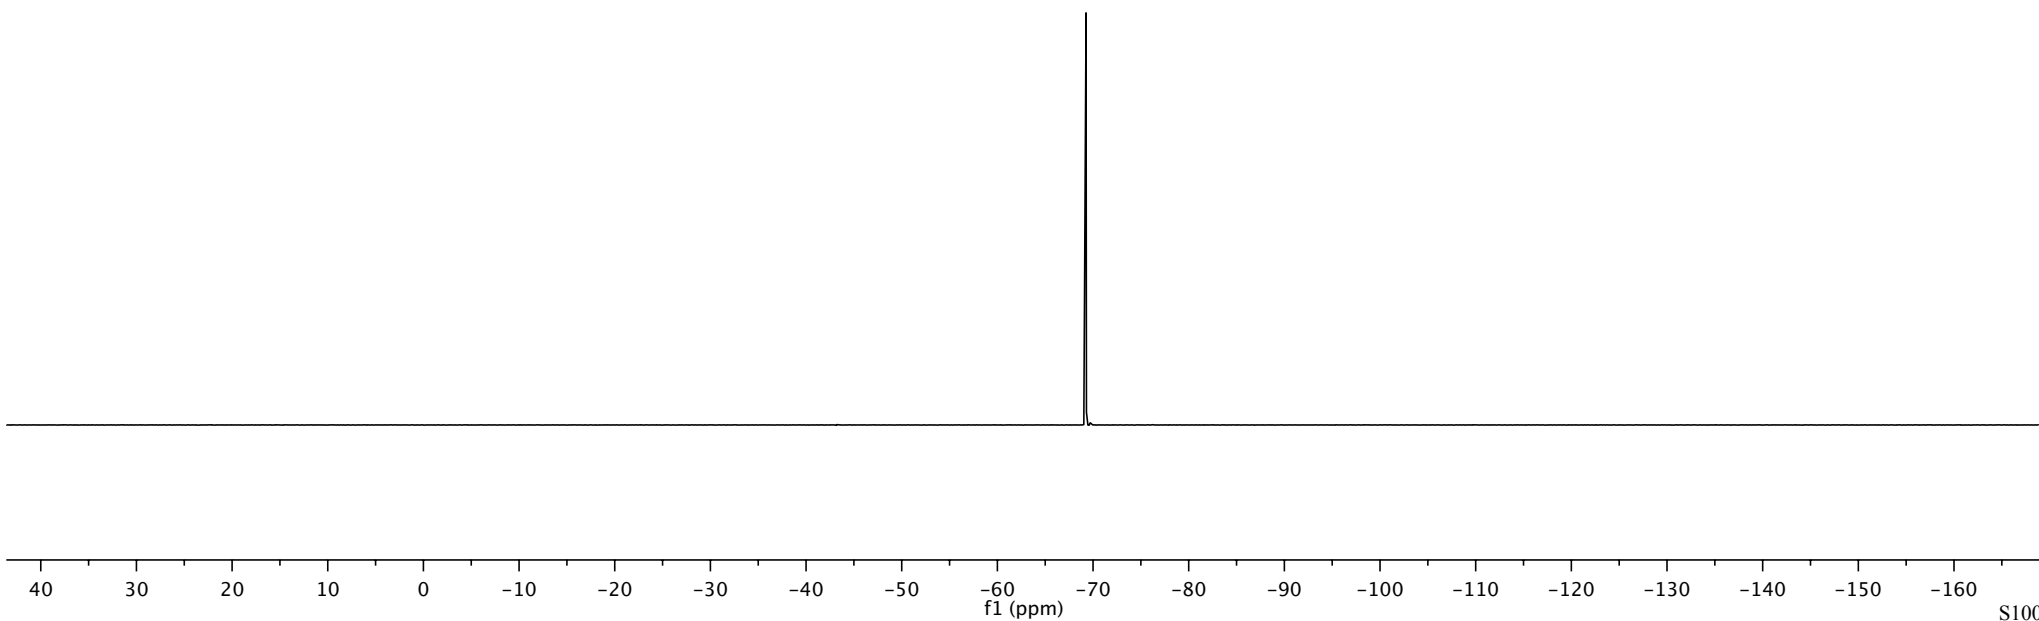

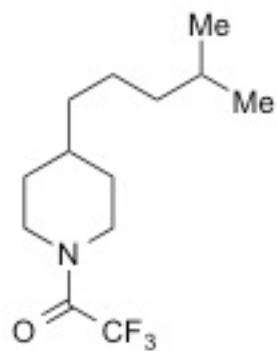

--69.27

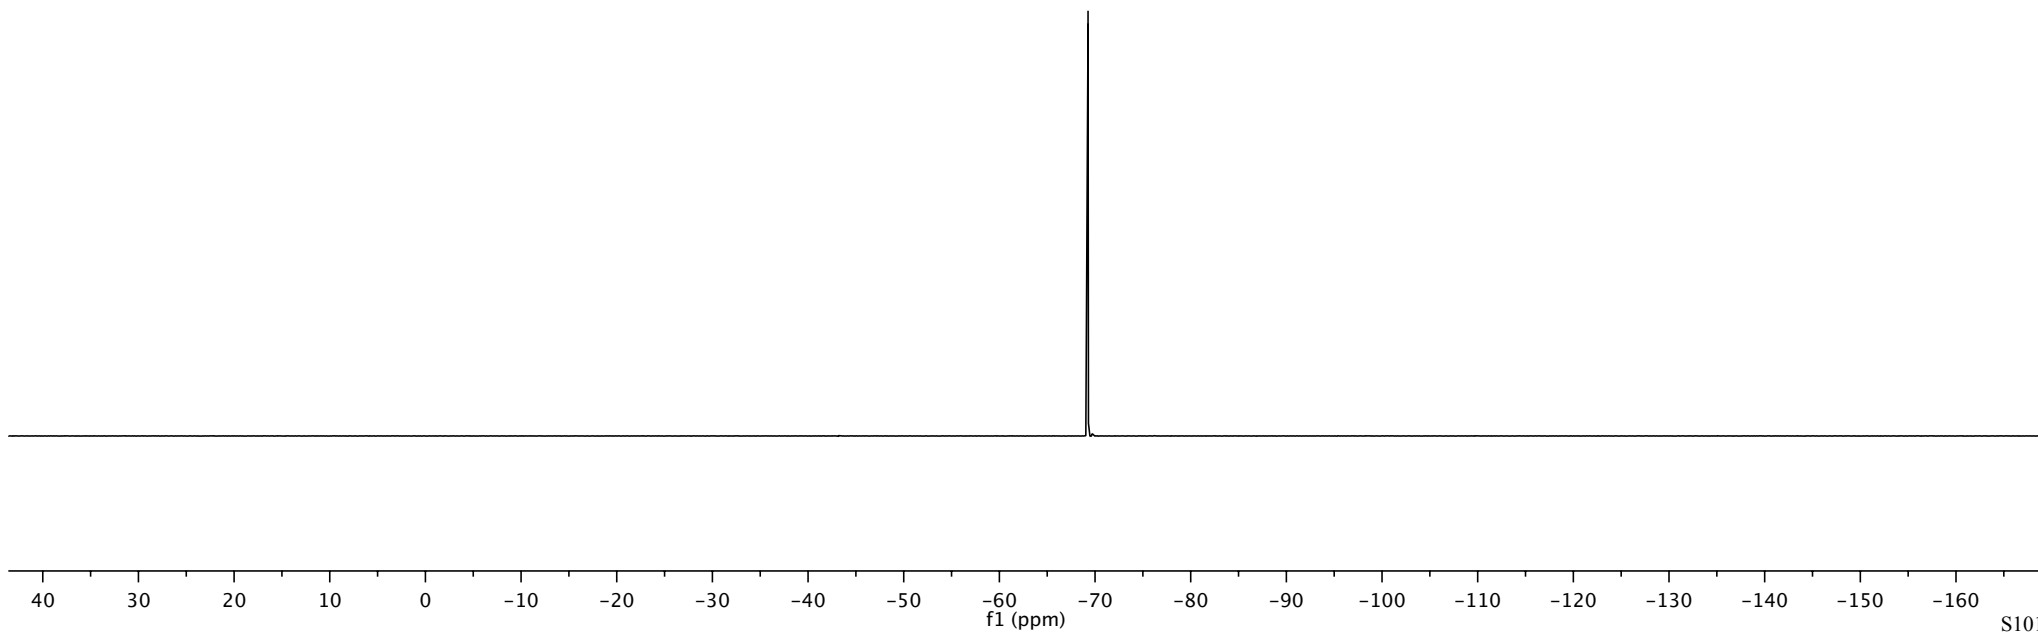

| Parameter              | Value   |
|------------------------|---------|
| Origin                 | Varian  |
| Spectrometer           | inova   |
| Solvent                | CDCl3   |
| Temperature            | 20.0    |
| Pulse Sequence         | s2pul   |
| Experiment             | 1D      |
| Probe                  | QUAD    |
| Number of Scans        | 732     |
| Receiver Gain          | 60      |
| Relaxation Delay       | 2.0000  |
| Pulse Width            | 0.0000  |
| Acquisition Time       | 1.0863  |
| Spectrometer Frequency | 125.66  |
| Spectral Width         | 30165.9 |
| Lowest Frequency       | -1272.6 |
| Nucleus                | 13C     |
| Acquired Size          | 32768   |
| Spectral Size          | 65536   |

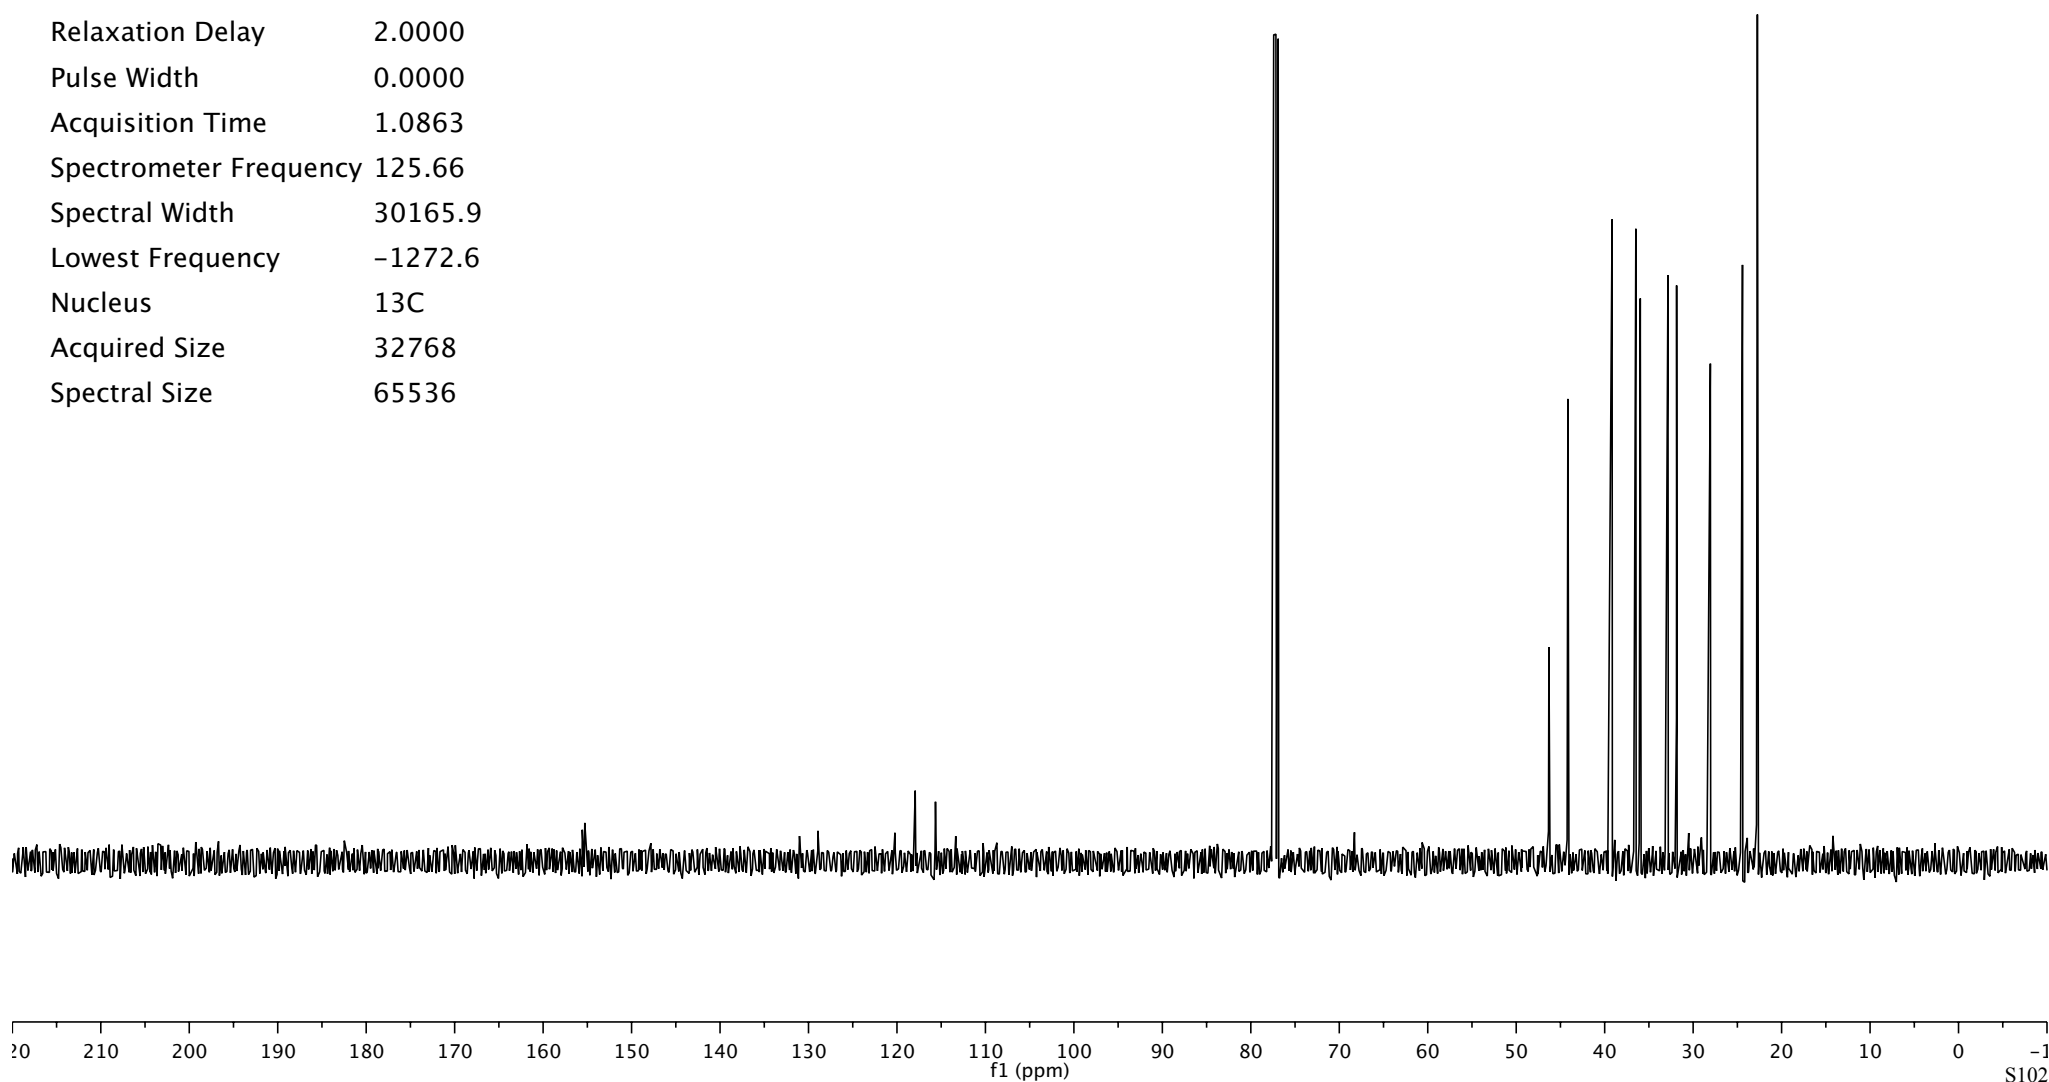

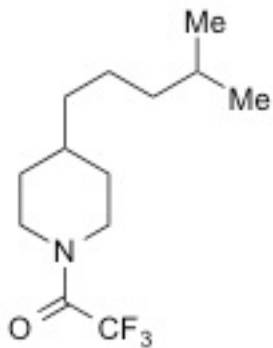

—155.29

120.23  
117.94  
115.65  
113.36

—77.16 CDCl<sub>3</sub>

46.33  
46.31  
46.28  
46.25  
44.16  
39.16  
36.48  
35.97  
32.85  
31.87  
28.05  
24.42  
22.73

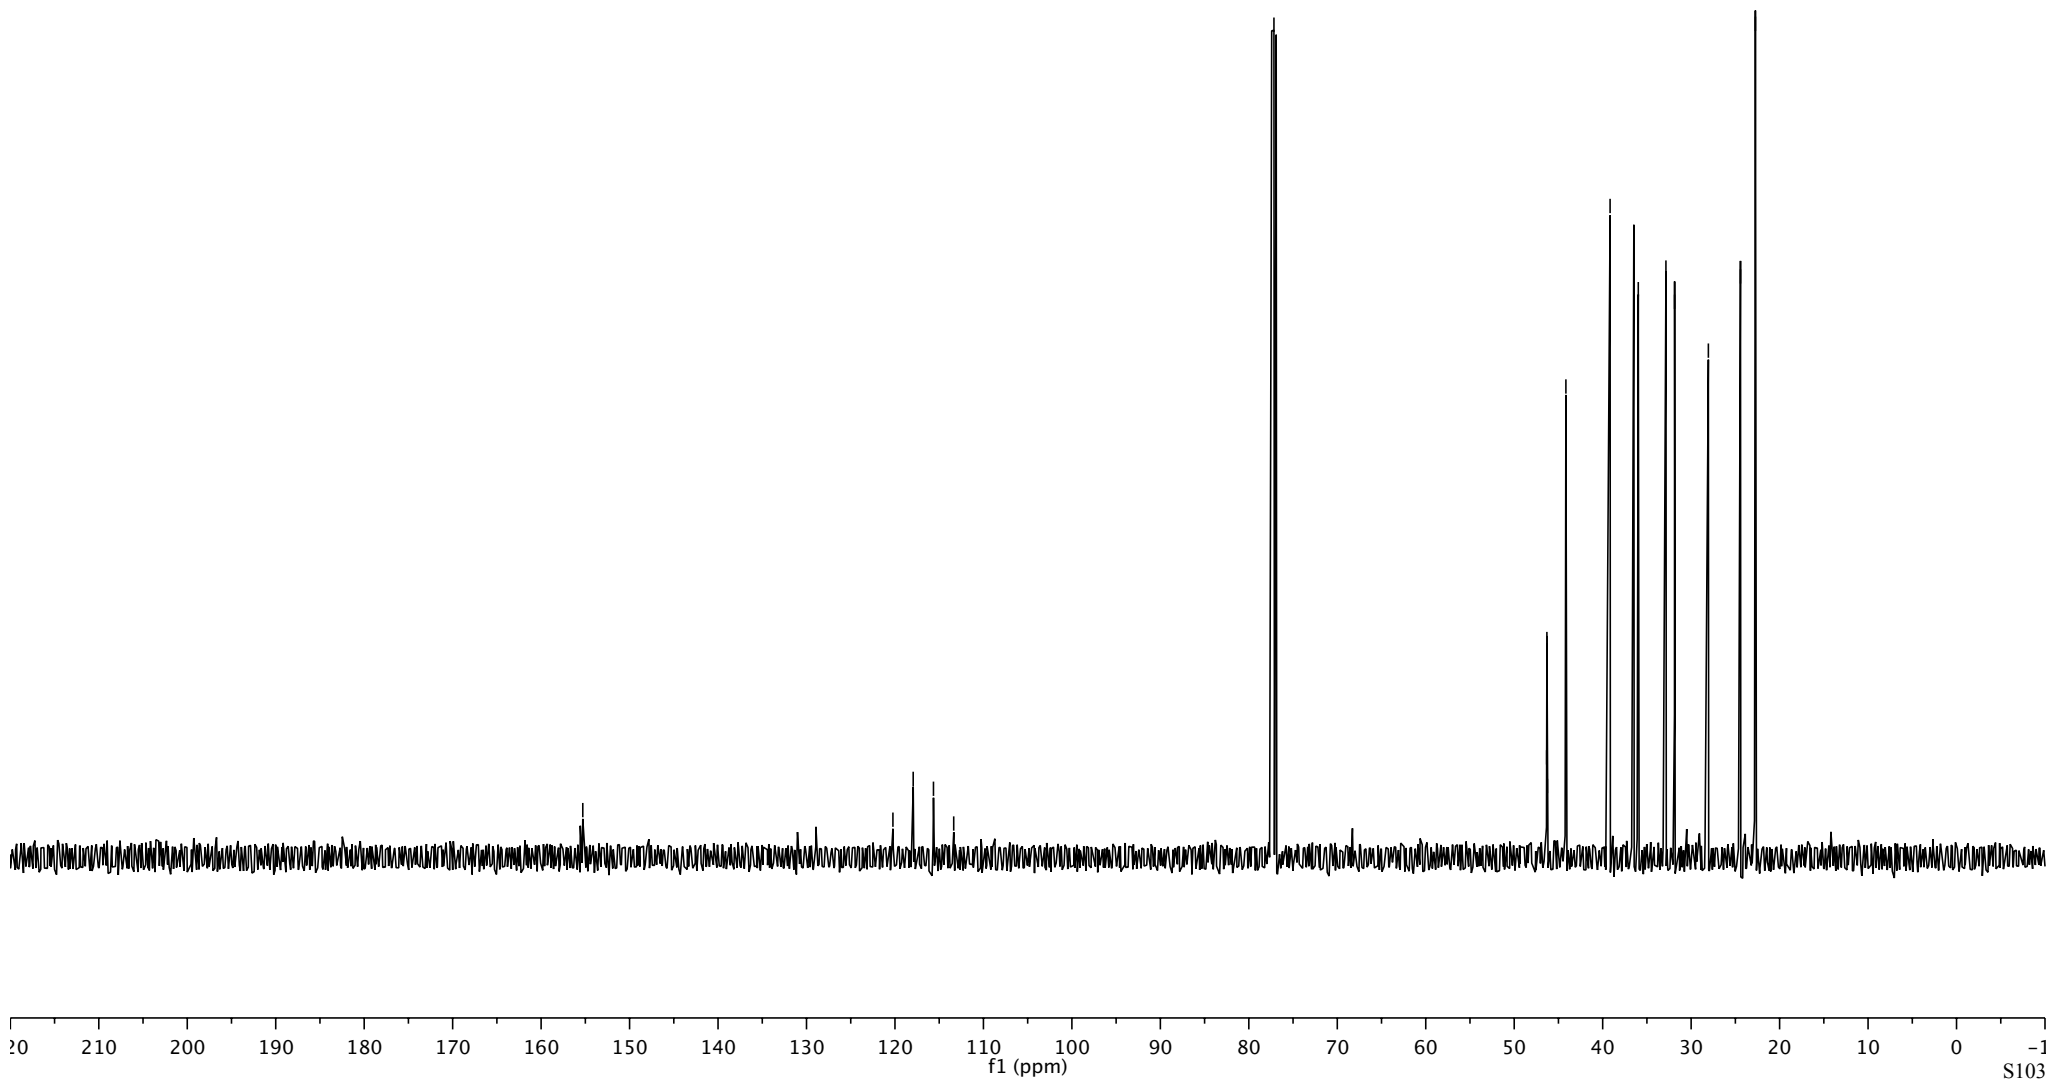



| Parameter              | Value             |
|------------------------|-------------------|
| Origin                 | Varian            |
| Spectrometer           | inova             |
| Solvent                | CDCl <sub>3</sub> |
| Temperature            | 20.0              |
| Pulse Sequence         | s2pul             |
| Experiment             | 1D                |
| Probe                  | QUAD              |
| Number of Scans        | 16                |
| Receiver Gain          | 46                |
| Relaxation Delay       | 2.0000            |
| Pulse Width            | 0.0000            |
| Acquisition Time       | 4.6645            |
| Spectrometer Frequency | 499.69            |
| Spectral Width         | 7024.9            |
| Lowest Frequency       | -1021.9           |
| Nucleus                | <sup>1</sup> H    |
| Acquired Size          | 32768             |
| Spectral Size          | 65536             |

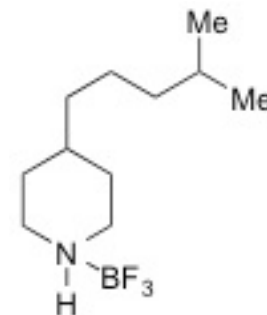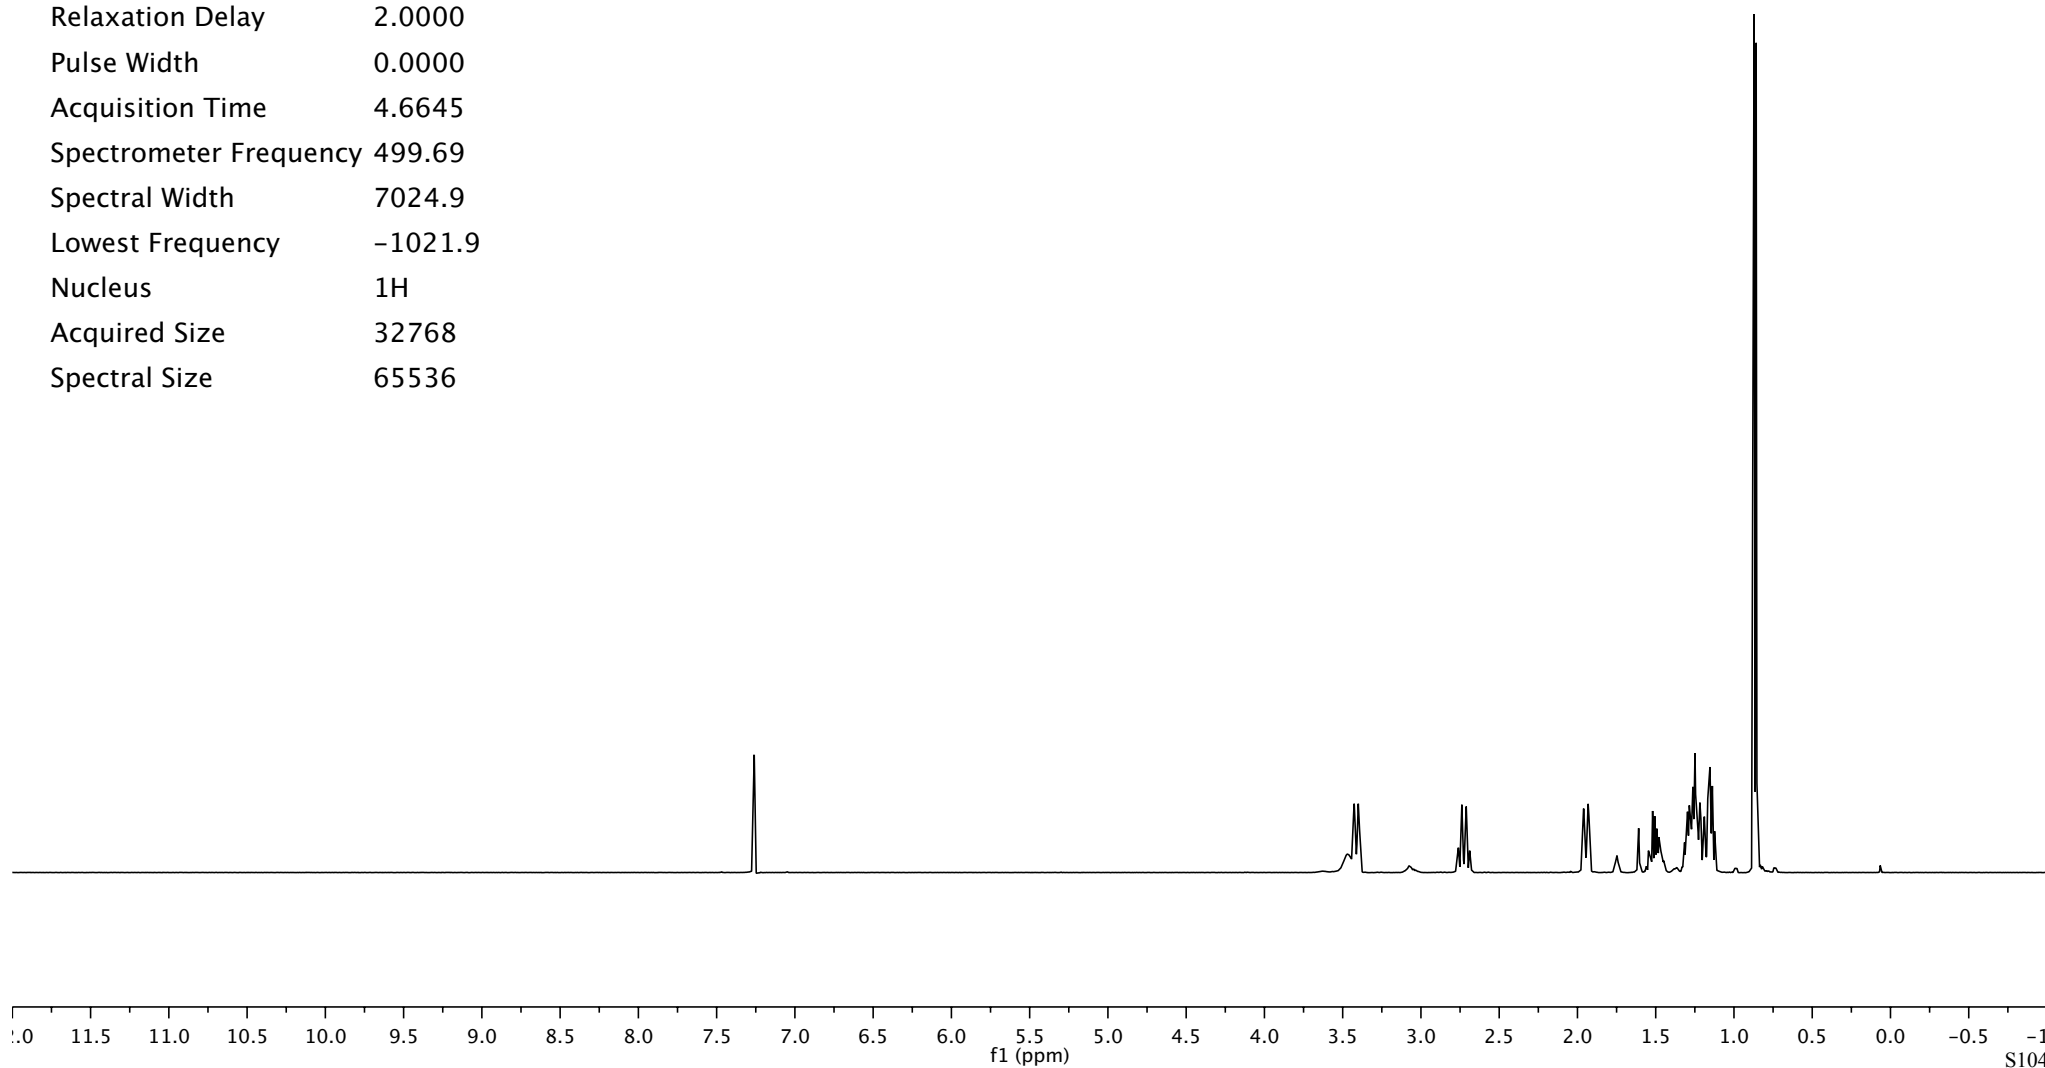

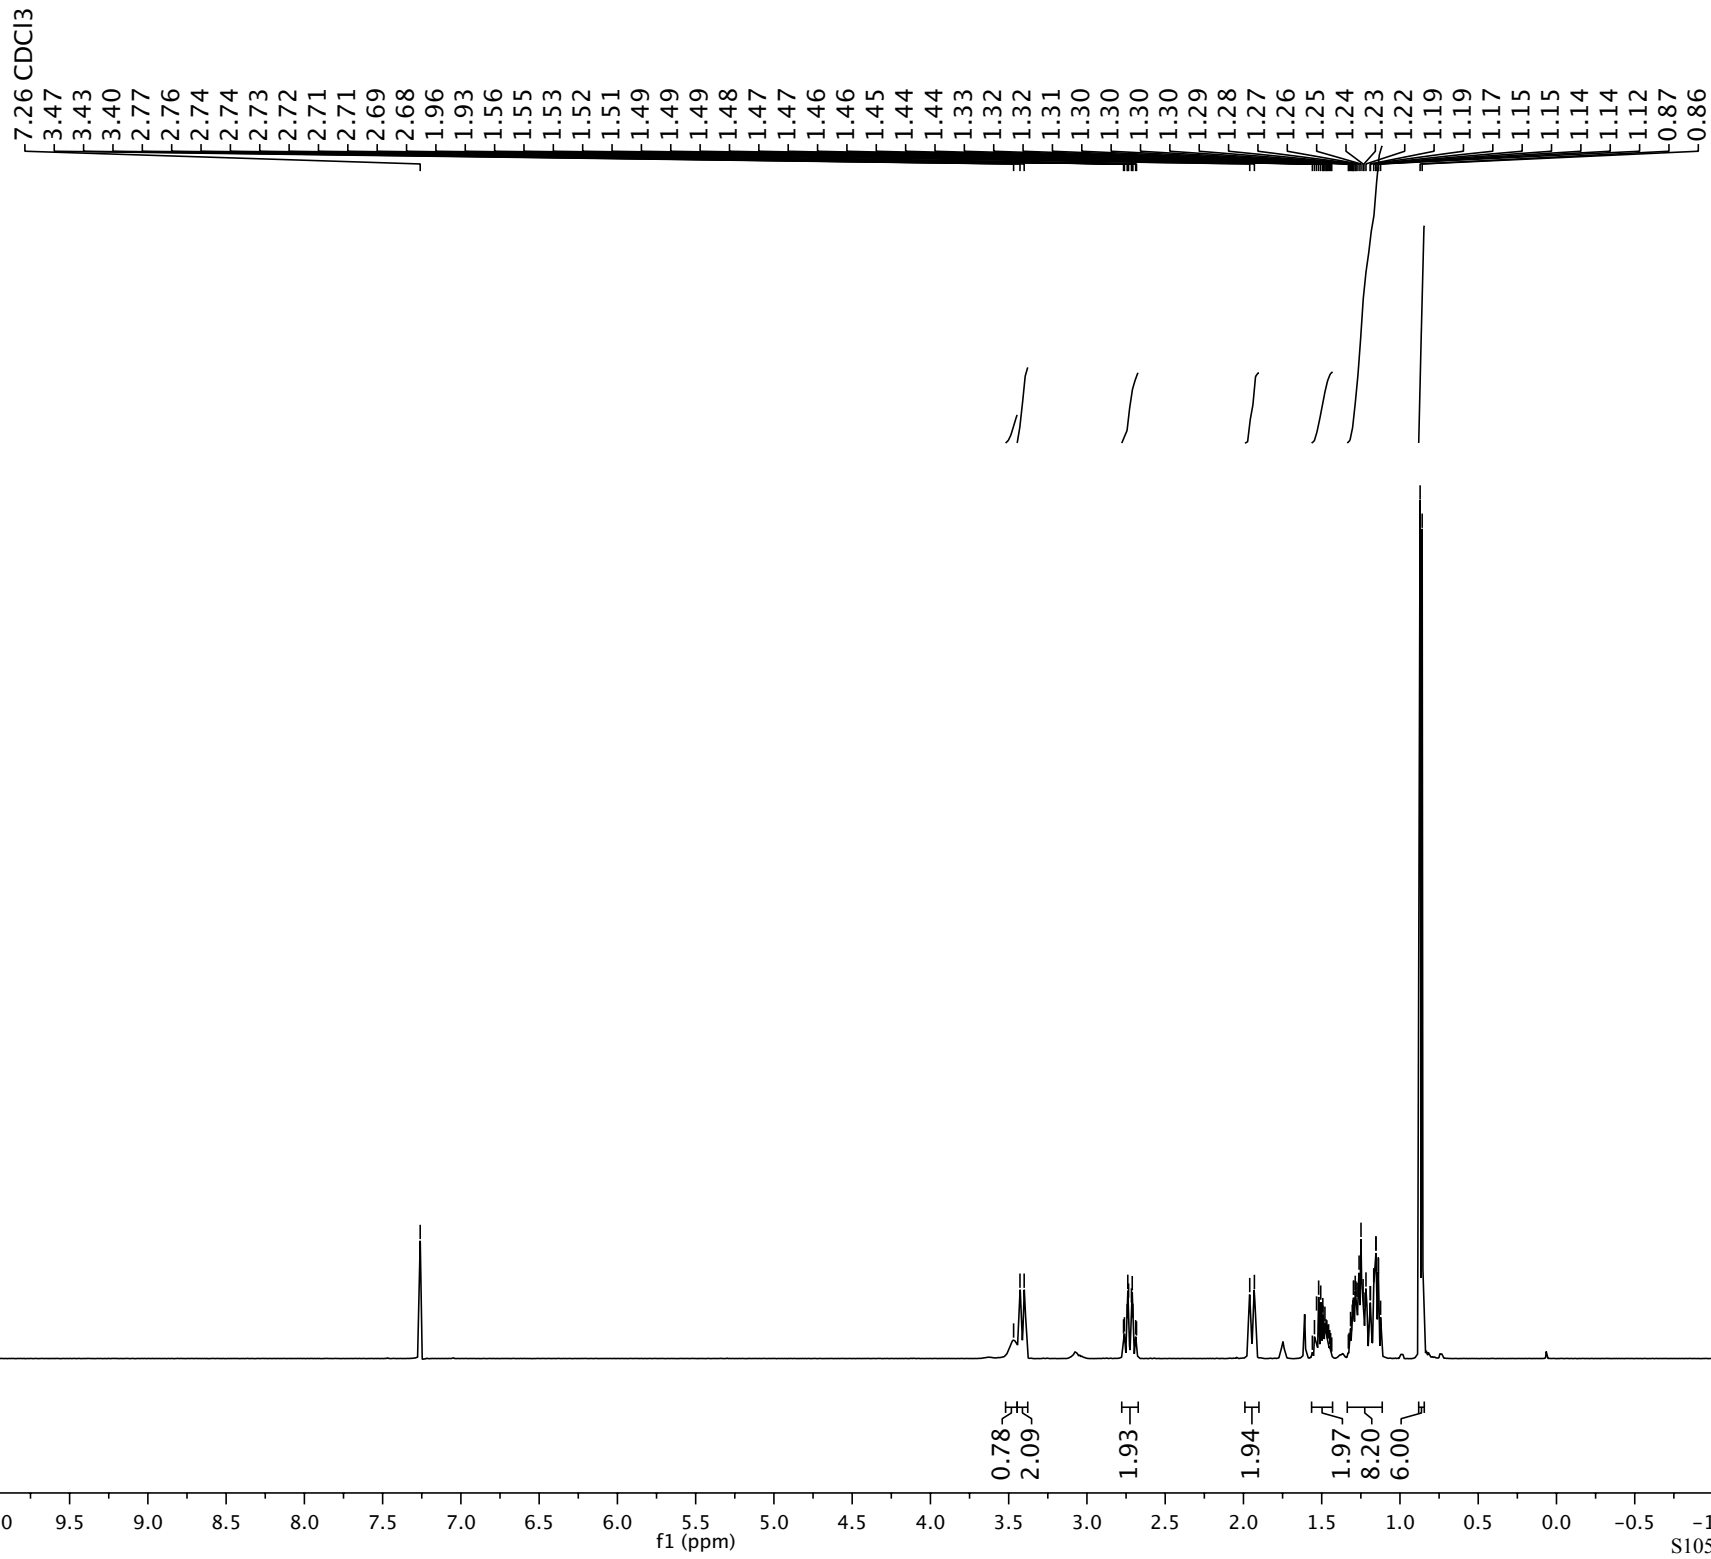

| Parameter              | Value             |
|------------------------|-------------------|
| Origin                 | Varian            |
| Spectrometer           | inova             |
| Solvent                | CDCl <sub>3</sub> |
| Temperature            | 20.0              |
| Pulse Sequence         | s2pul             |
| Experiment             | 1D                |
| Probe                  | QUAD              |
| Number of Scans        | 1012              |
| Receiver Gain          | 60                |
| Relaxation Delay       | 2.0000            |
| Pulse Width            | 0.0000            |
| Acquisition Time       | 1.0863            |
| Spectrometer Frequency | 125.66            |
| Spectral Width         | 30165.9           |
| Lowest Frequency       | -1272.5           |
| Nucleus                | <sup>13</sup> C   |
| Acquired Size          | 32768             |
| Spectral Size          | 65536             |

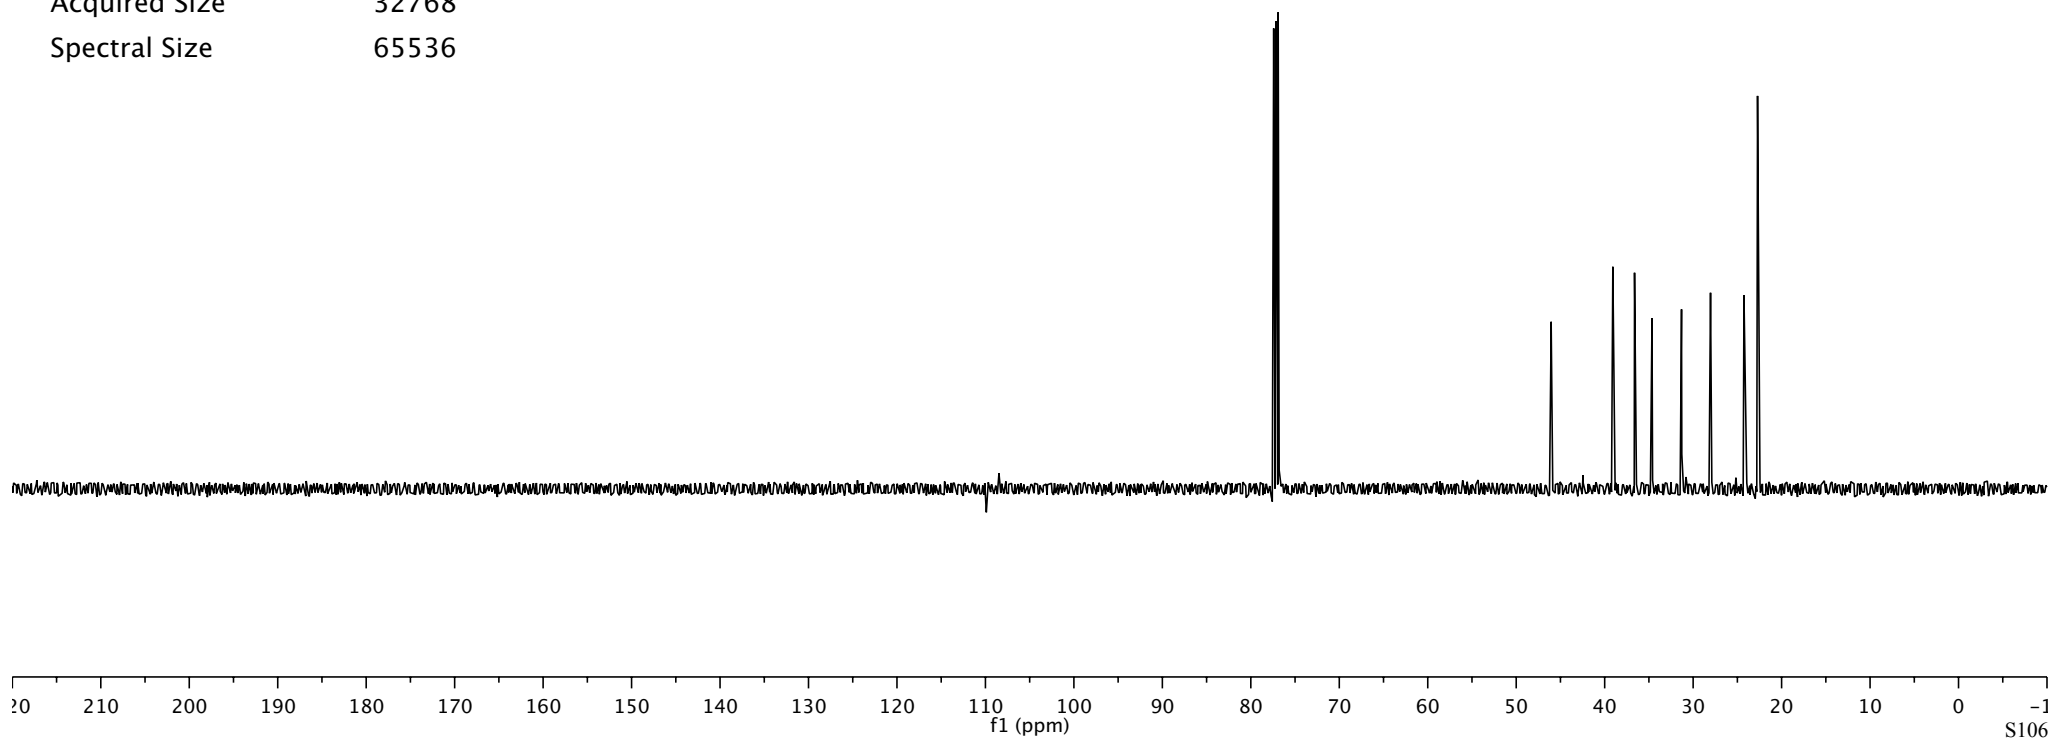

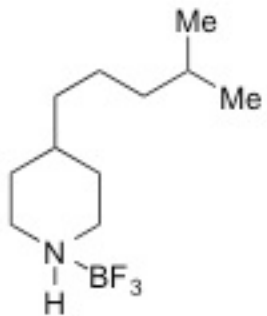

—77.16 CDCl<sub>3</sub>

—46.05  
—39.08  
—36.62  
—34.65  
—31.31  
—28.03  
—24.25  
—22.72

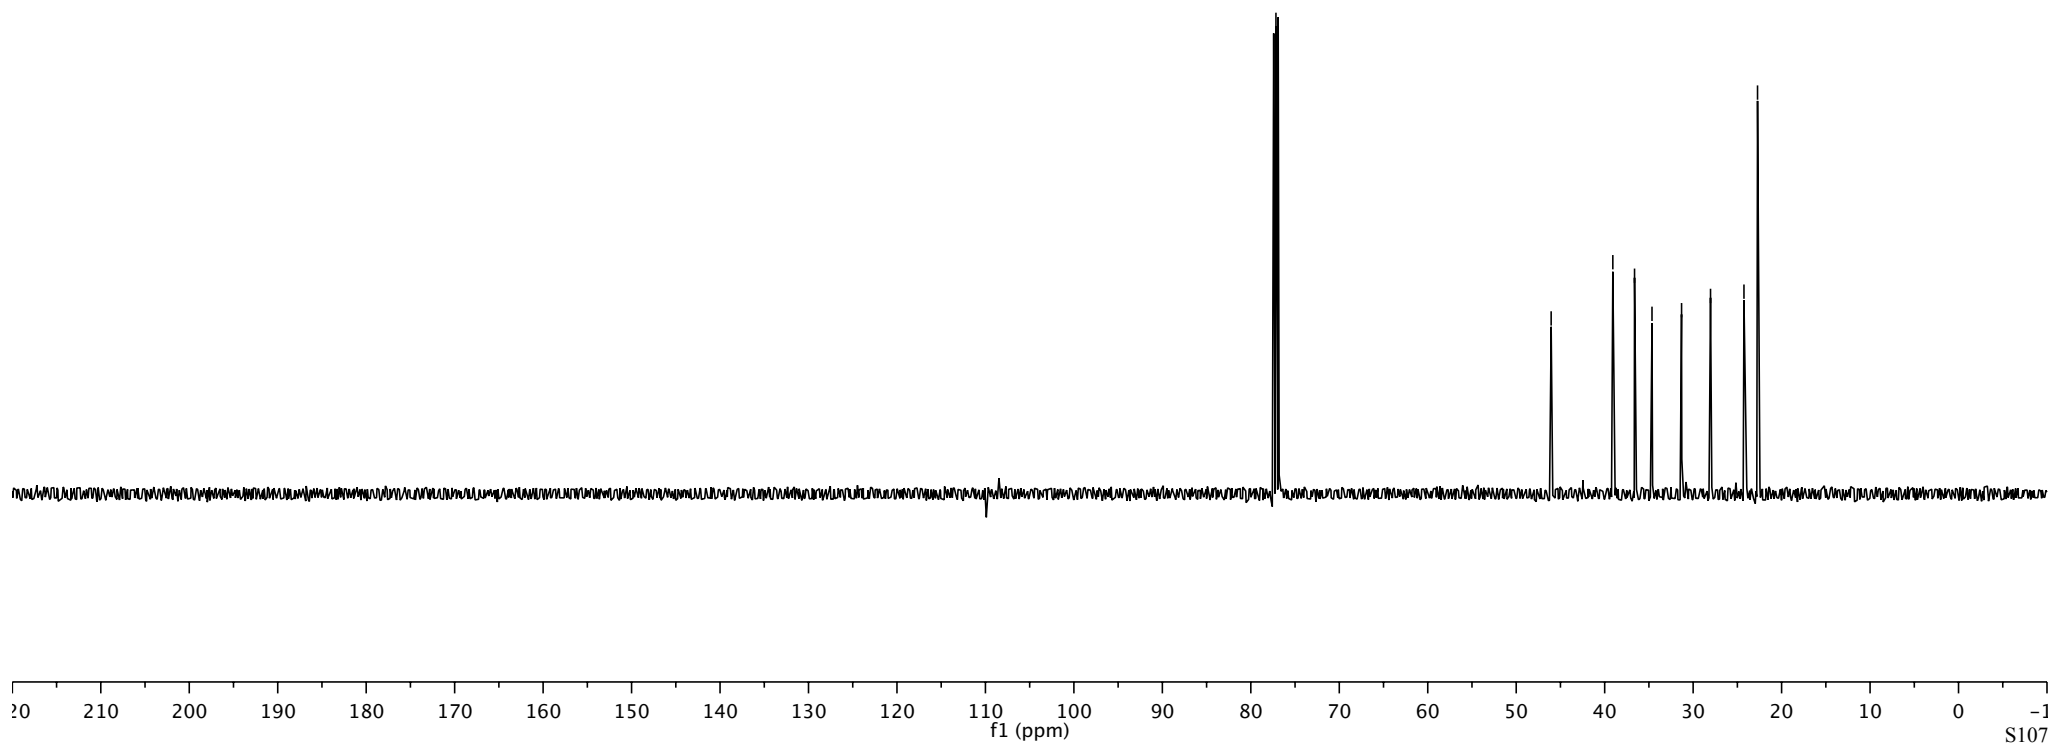

| Parameter              | Value           |
|------------------------|-----------------|
| Origin                 | Varian          |
| Spectrometer           | inova           |
| Solvent                | CDCl3           |
| Temperature            | 20.0            |
| Pulse Sequence         | s2pul           |
| Experiment             | 1D              |
| Probe                  | QUAD            |
| Number of Scans        | 132             |
| Receiver Gain          | 60              |
| Relaxation Delay       | 0.0000          |
| Pulse Width            | 0.0000          |
| Acquisition Time       | 0.3277          |
| Spectrometer Frequency | 470.15          |
| Spectral Width         | 100000.0        |
| Lowest Frequency       | -79501.3        |
| Nucleus                | <sup>19</sup> F |
| Acquired Size          | 32768           |
| Spectral Size          | 65536           |

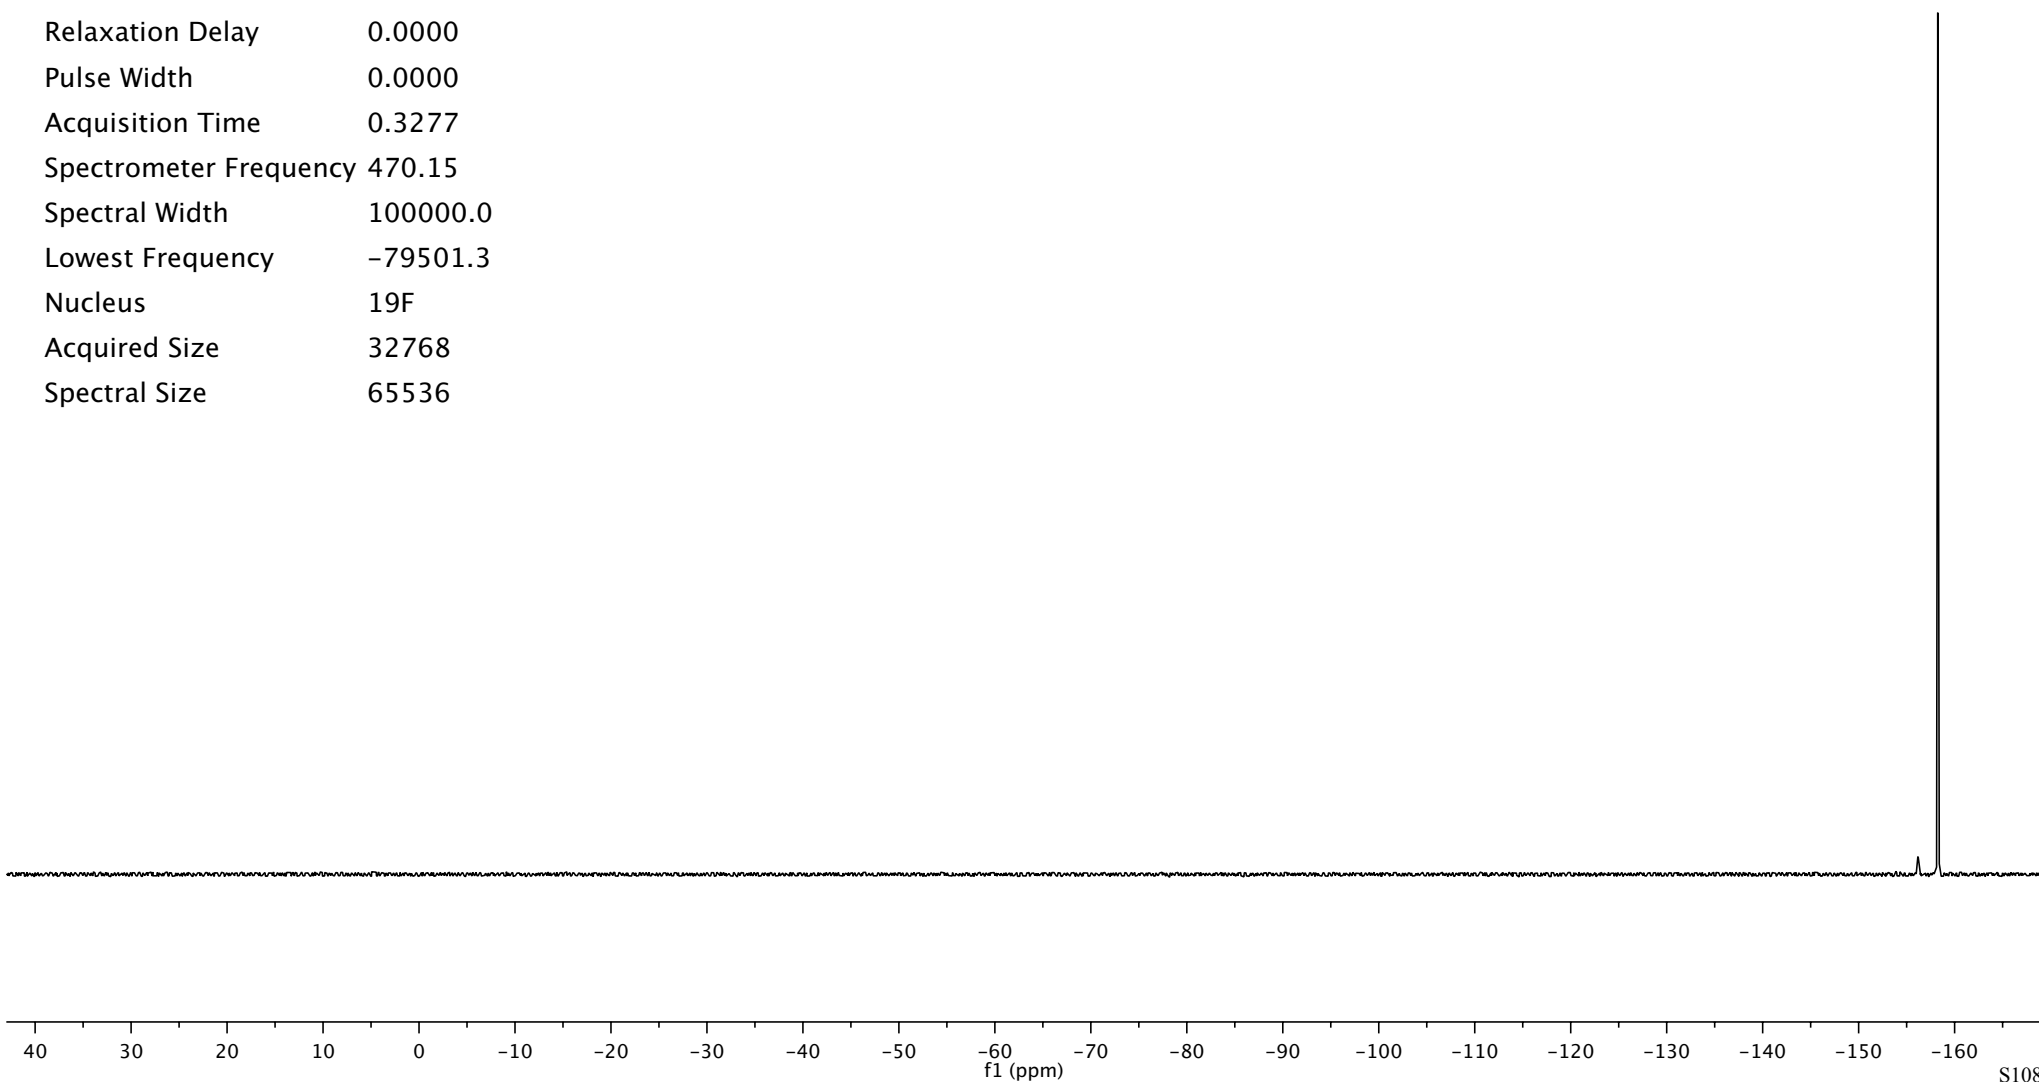

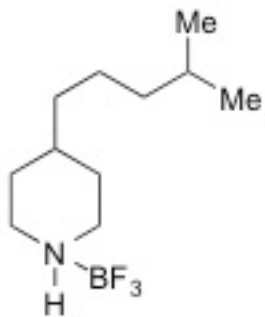

--158.24

--158.27

--158.31

--158.34

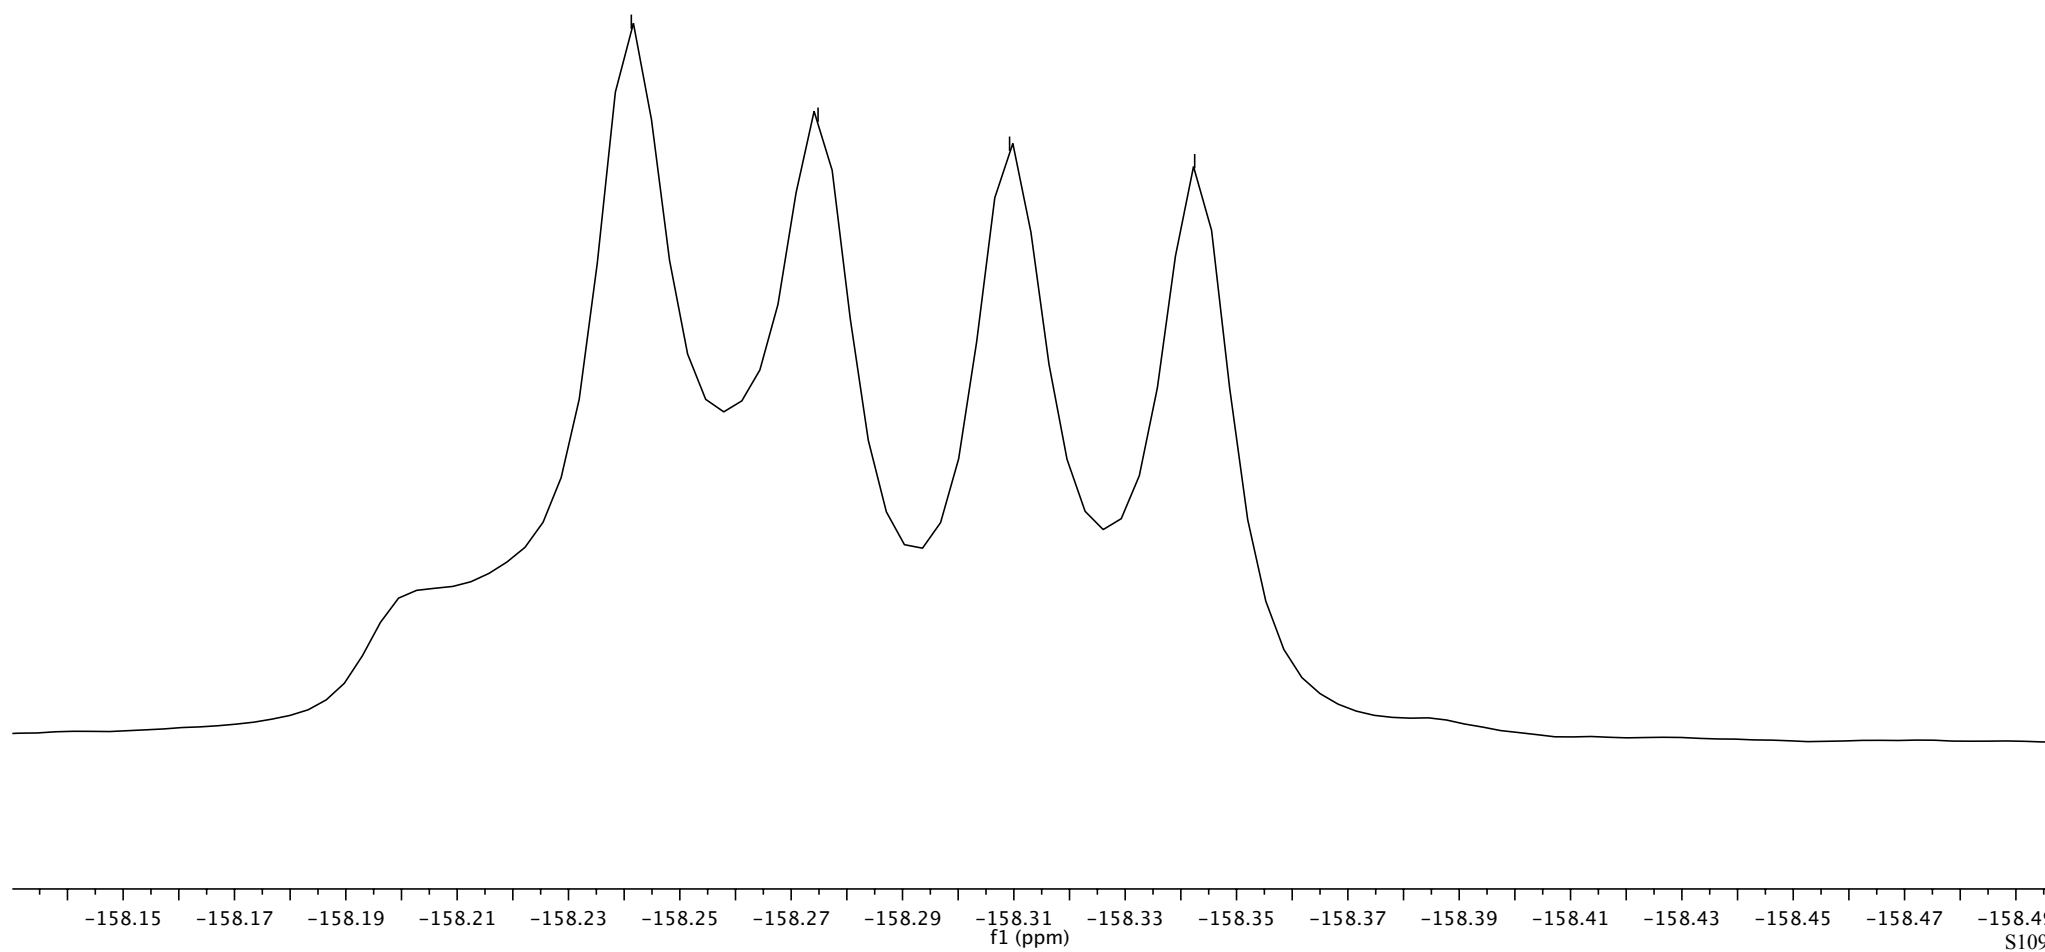

|    | Parameter              | Value          |
|----|------------------------|----------------|
| 1  | Origin                 | Varian         |
| 2  | Spectrometer           | inova          |
| 3  | Solvent                | CDCl3          |
| 4  | Temperature            | 20.0           |
| 5  | Pulse Sequence         | s2pul          |
| 6  | Experiment             | 1D             |
| 7  | Probe                  | QUAD           |
| 8  | Number of Scans        | 8              |
| 9  | Receiver Gain          | 41             |
| 10 | Relaxation Delay       | 0.0000         |
| 11 | Pulse Width            | 0.0000         |
| 12 | Acquisition Time       | 4.6645         |
| 13 | Spectrometer Frequency | 499.69         |
| 14 | Spectral Width         | 7024.9         |
| 15 | Lowest Frequency       | -1011.4        |
| 16 | Nucleus                | <sup>1</sup> H |
| 17 | Acquired Size          | 32768          |
| 18 | Spectral Size          | 65536          |

— 7.26 CDCl<sub>3</sub>

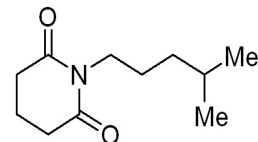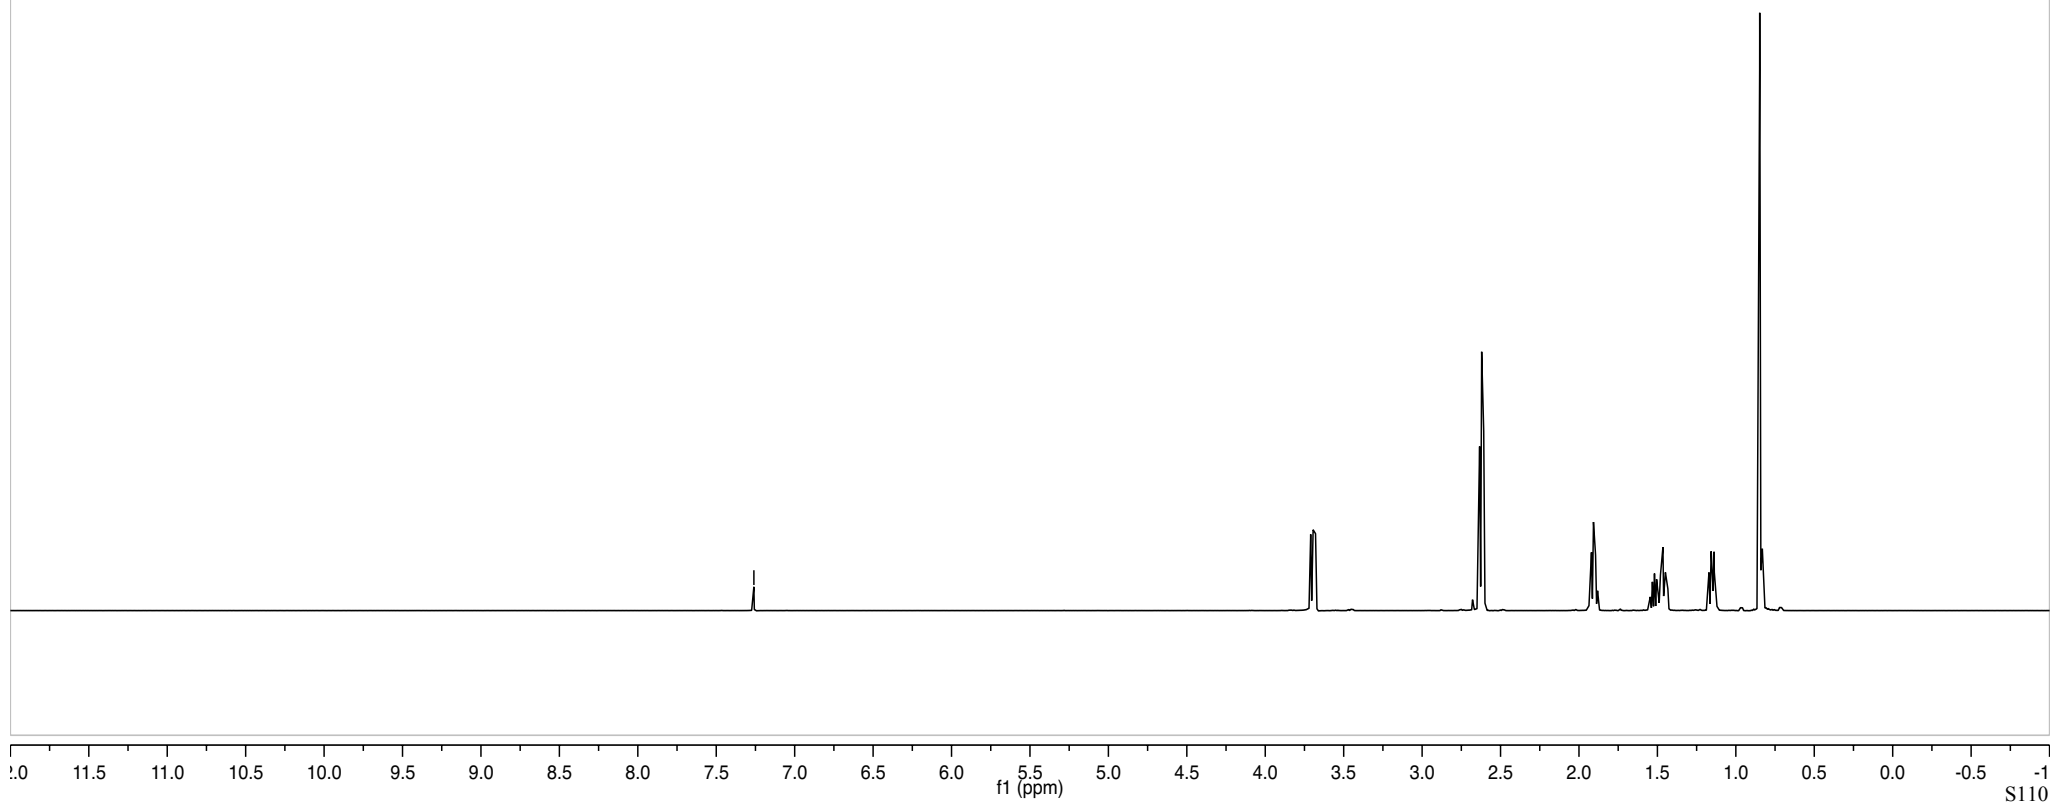

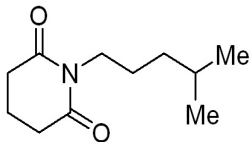

— 7.26 CDCl<sub>3</sub>

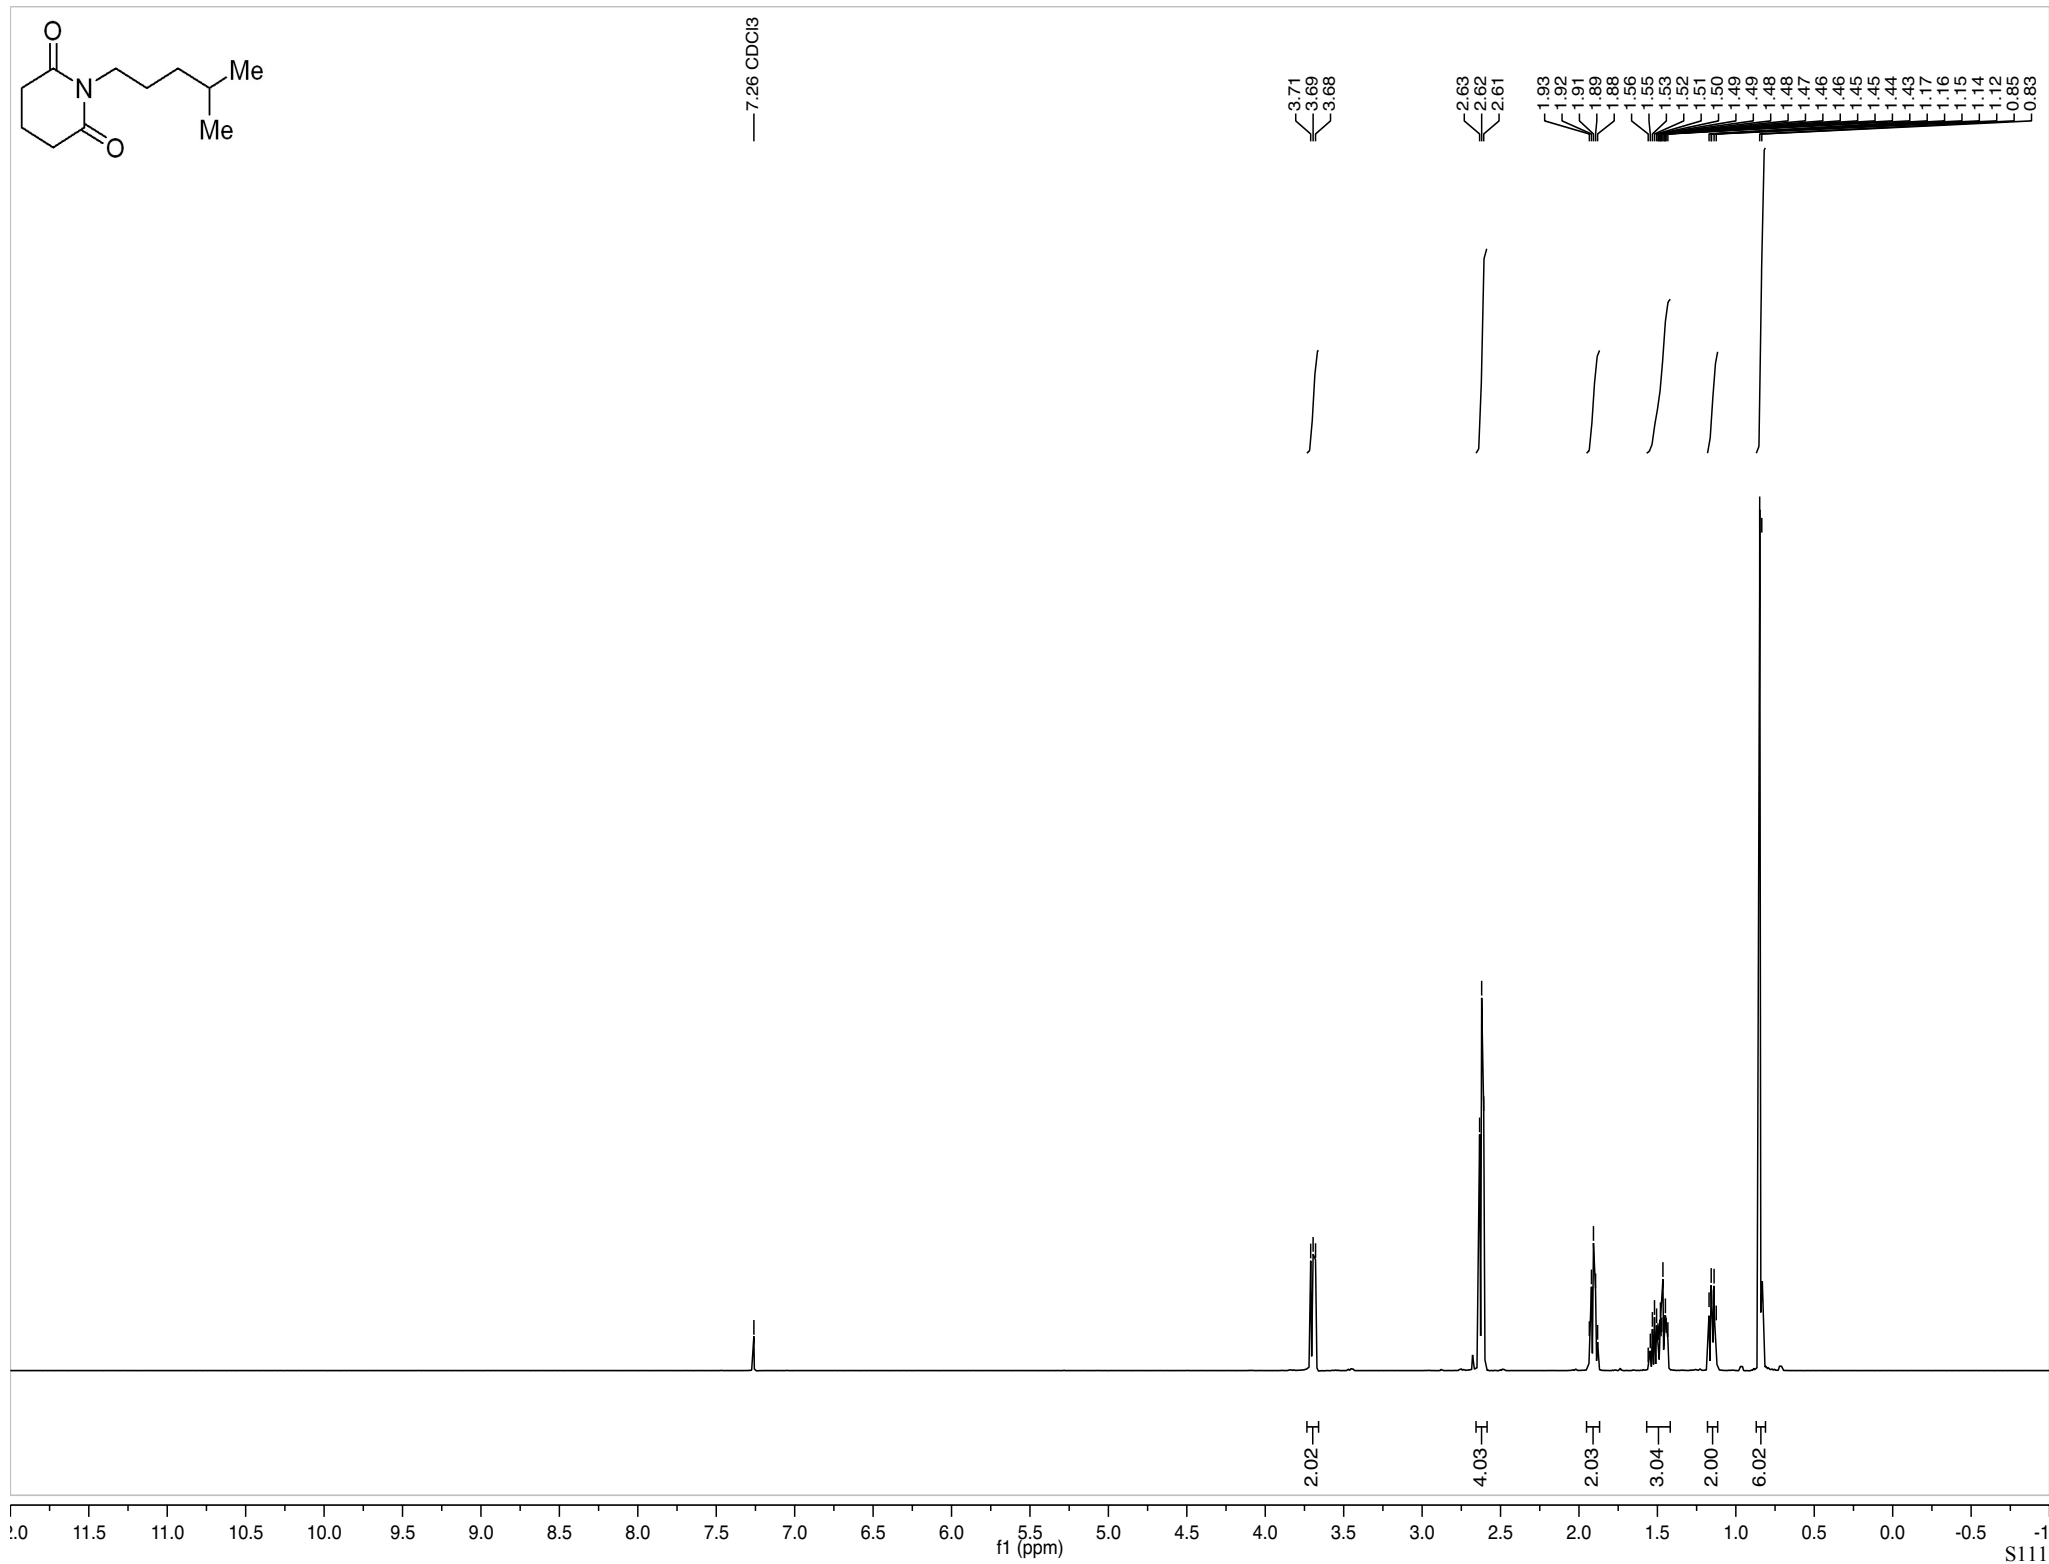



| Parameter                 | Value   |
|---------------------------|---------|
| 1 Origin                  | Varian  |
| 2 Spectrometer            | inova   |
| 3 Solvent                 | CDCl3   |
| 4 Temperature             | 20.0    |
| 5 Pulse Sequence          | s2pul   |
| 6 Experiment              | 1D      |
| 7 Probe                   | QUAD    |
| 8 Number of Scans         | 80      |
| 9 Receiver Gain           | 60      |
| 10 Relaxation Delay       | 1.0000  |
| 11 Pulse Width            | 0.0000  |
| 12 Acquisition Time       | 1.0863  |
| 13 Spectrometer Frequency | 125.66  |
| 14 Spectral Width         | 30165.9 |
| 15 Lowest Frequency       | -1274.3 |
| 16 Nucleus                | 13C     |
| 17 Acquired Size          | 32768   |
| 18 Spectral Size          | 65536   |

— 77.2 CDCl3

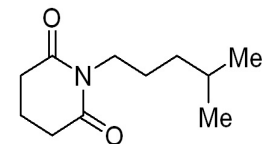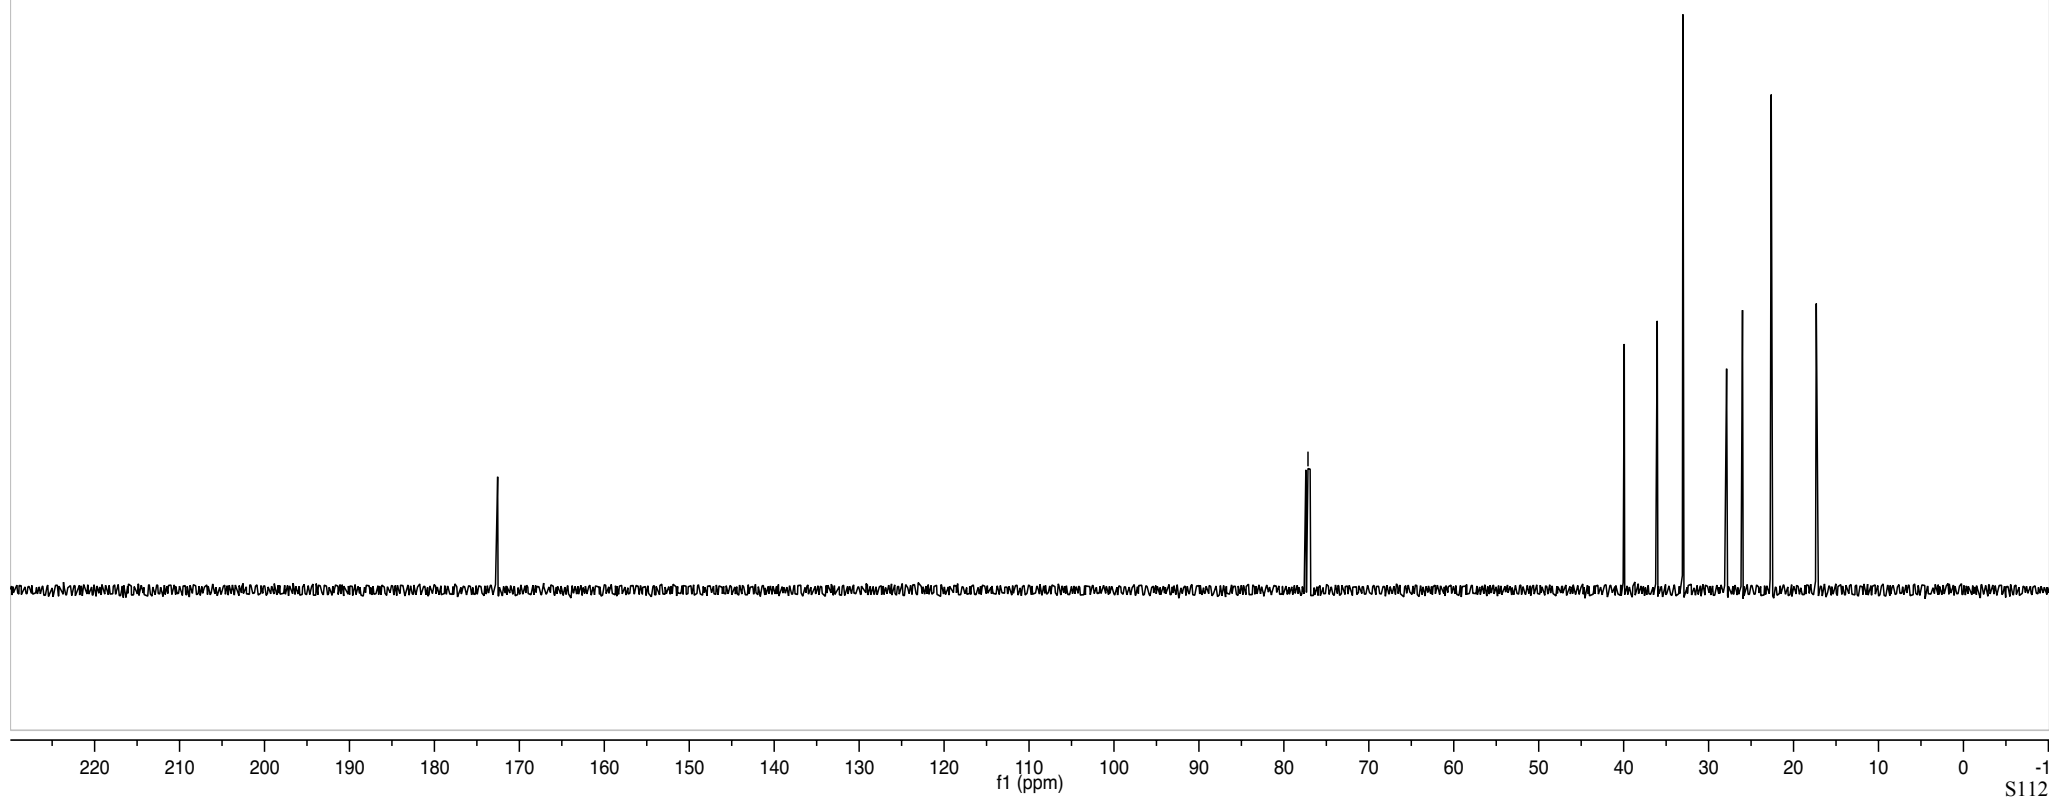

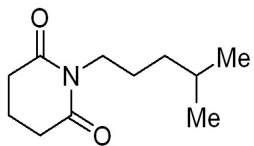

—172.6

—77.2 CDCl<sub>3</sub>

39.9  
36.0  
33.0  
27.9  
26.0  
22.6  
—17.3

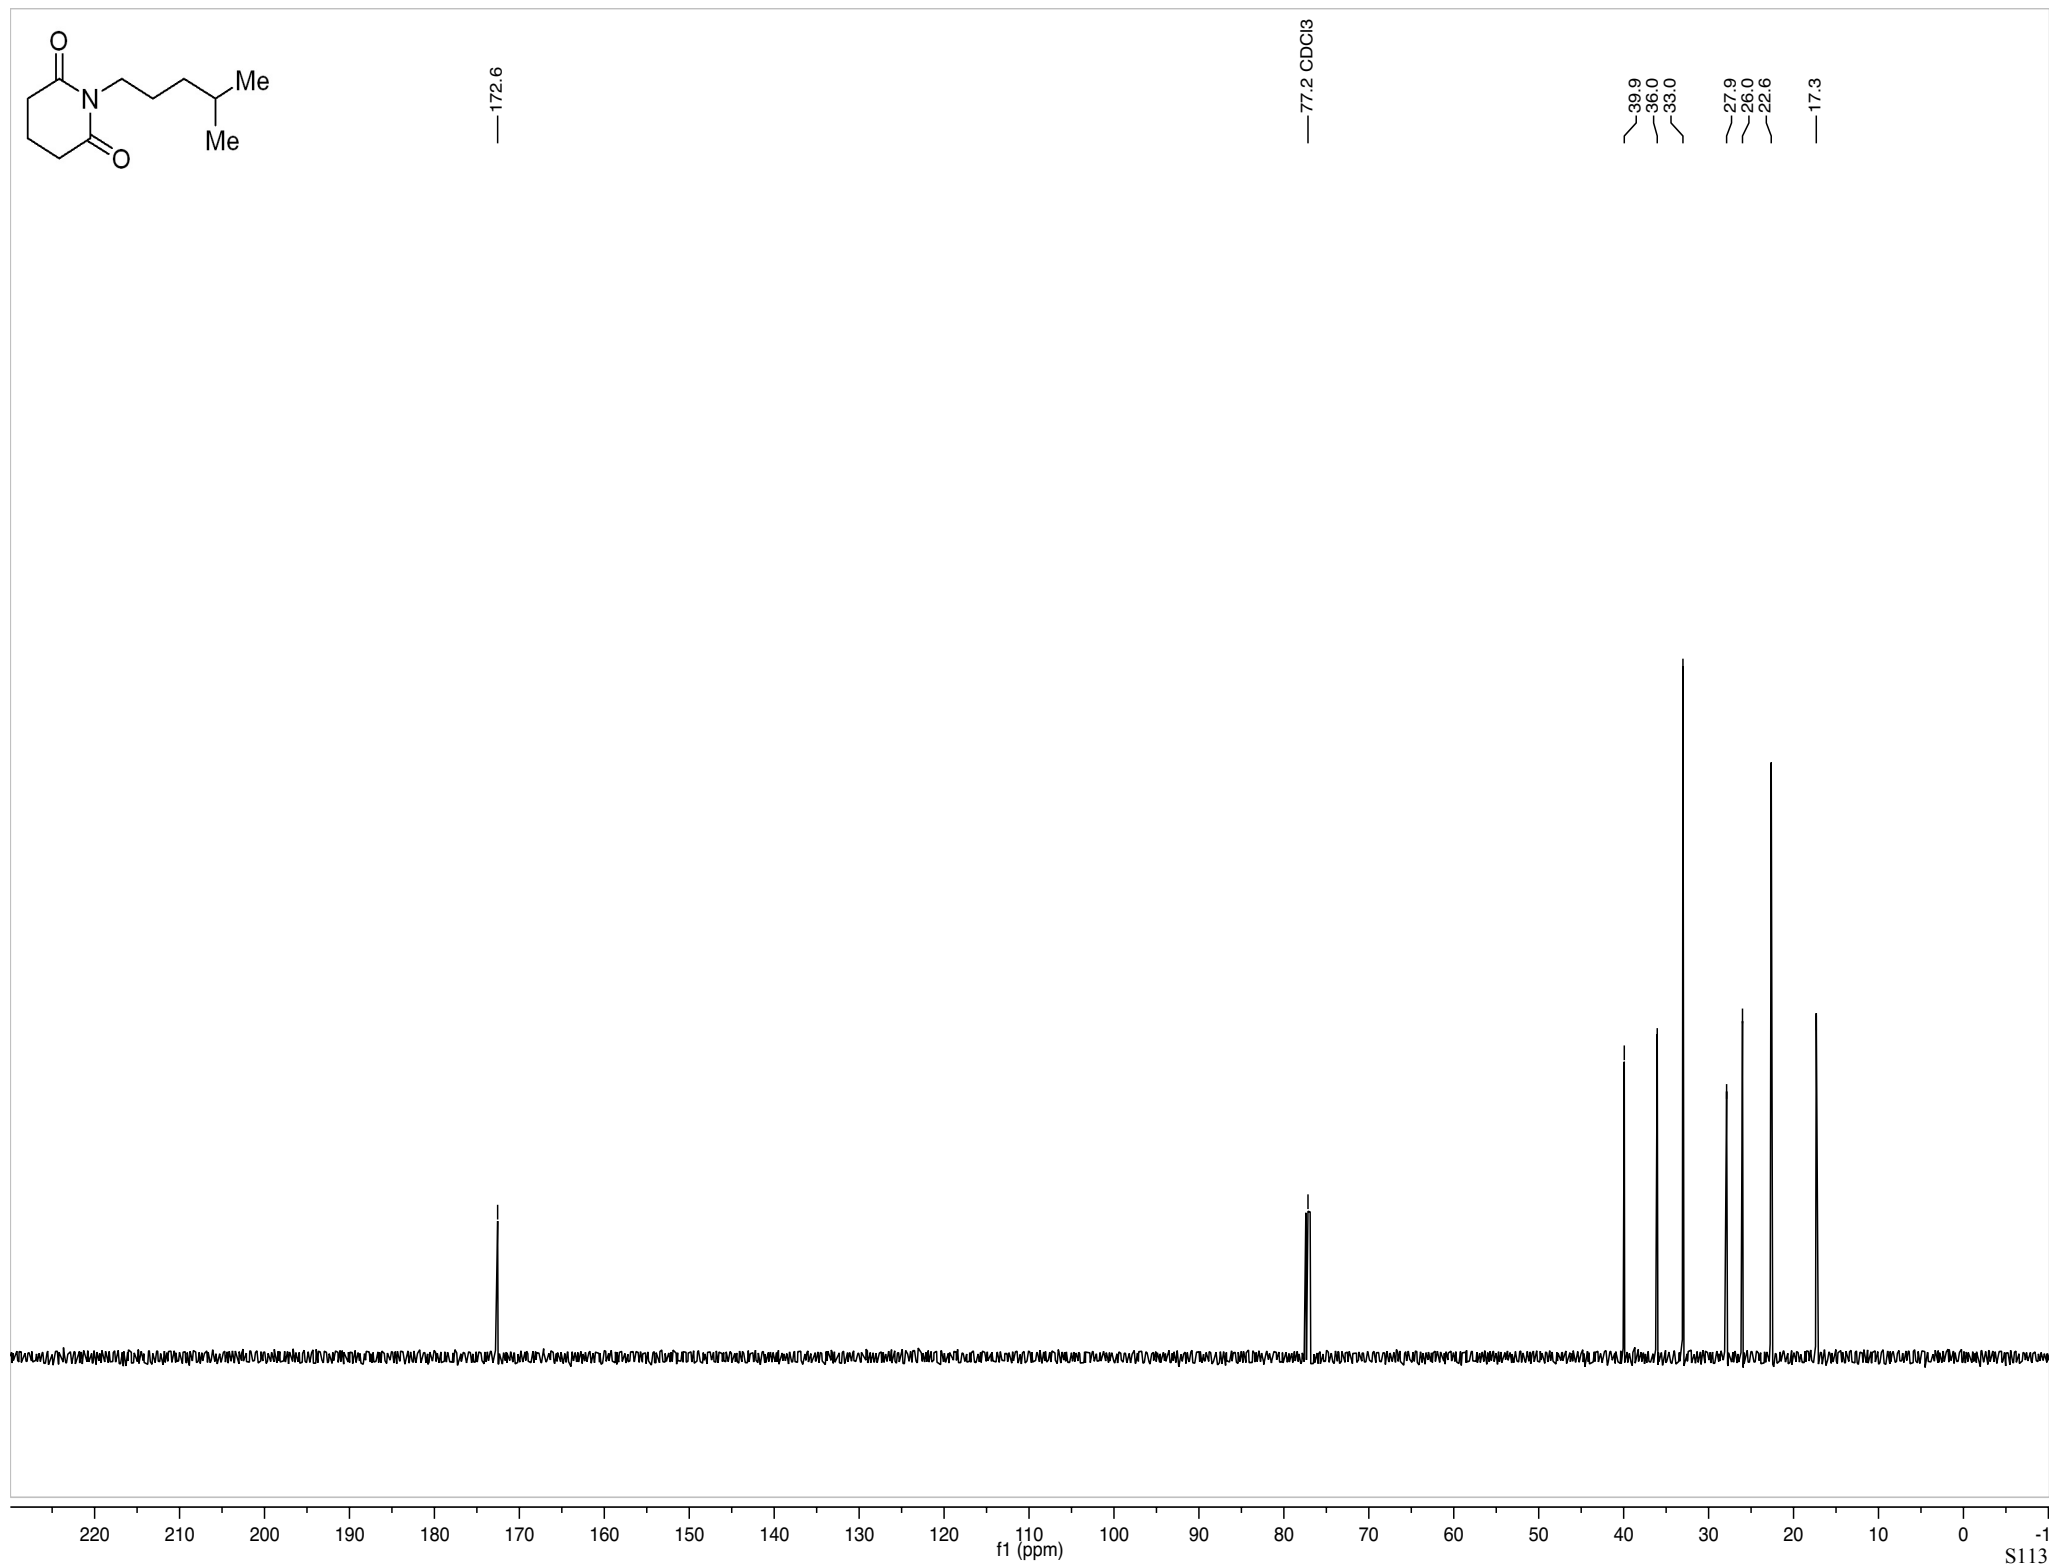

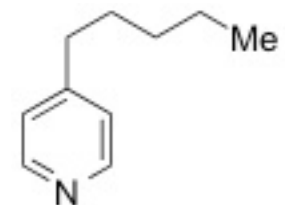

| Parameter              | Value          |
|------------------------|----------------|
| Origin                 | Varian         |
| Spectrometer           | inova          |
| Solvent                | CDCl3          |
| Temperature            | 20.0           |
| Pulse Sequence         | s2pul          |
| Experiment             | 1D             |
| Probe                  | 5mmsw          |
| Receiver Gain          | 52             |
| Relaxation Delay       | 0.0000         |
| Pulse Width            | 0.0000         |
| Acquisition Time       | 4.0960         |
| Spectrometer Frequency | 399.74         |
| Spectral Width         | 8000.0         |
| Lowest Frequency       | -2421.6        |
| Nucleus                | <sup>1</sup> H |
| Acquired Size          | 32768          |
| Spectral Size          | 65536          |

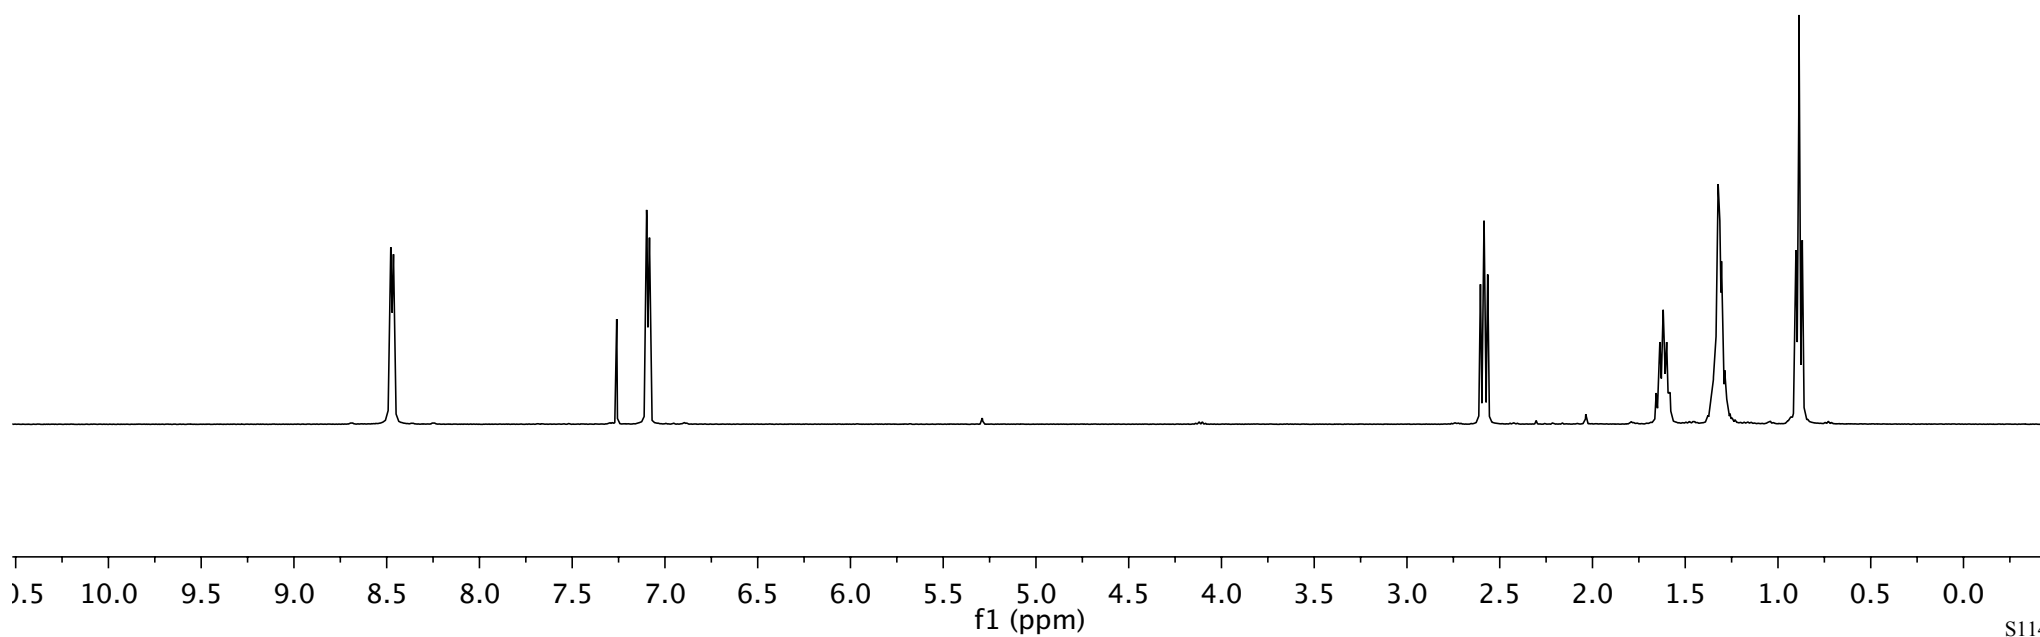

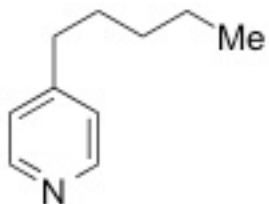

8.48  
8.46

7.26 CDCl<sub>3</sub>  
7.10  
7.08

2.60  
2.58  
2.56  
1.66  
1.64  
1.62  
1.60  
1.58  
1.37  
1.36  
1.34  
1.33  
1.32  
1.31  
1.30  
1.30  
1.29  
1.28  
1.27  
0.90  
0.89  
0.87

1.92

1.87

2.00

2.02

4.13

3.08

f1 (ppm)

| Parameter              | Value           |
|------------------------|-----------------|
| Origin                 | Varian          |
| Spectrometer           | inova           |
| Solvent                | CDCl3           |
| Temperature            | 20.0            |
| Pulse Sequence         | s2pul           |
| Experiment             | 1D              |
| Probe                  | QUADG           |
| Receiver Gain          | 60              |
| Relaxation Delay       | 2.0000          |
| Pulse Width            | 0.0000          |
| Acquisition Time       | 1.0240          |
| Spectrometer Frequency | 125.60          |
| Spectral Width         | 32000.0         |
| Lowest Frequency       | -2200.5         |
| Nucleus                | <sup>13</sup> C |
| Acquired Size          | 32768           |
| Spectral Size          | 65536           |

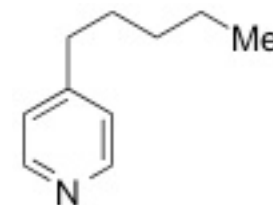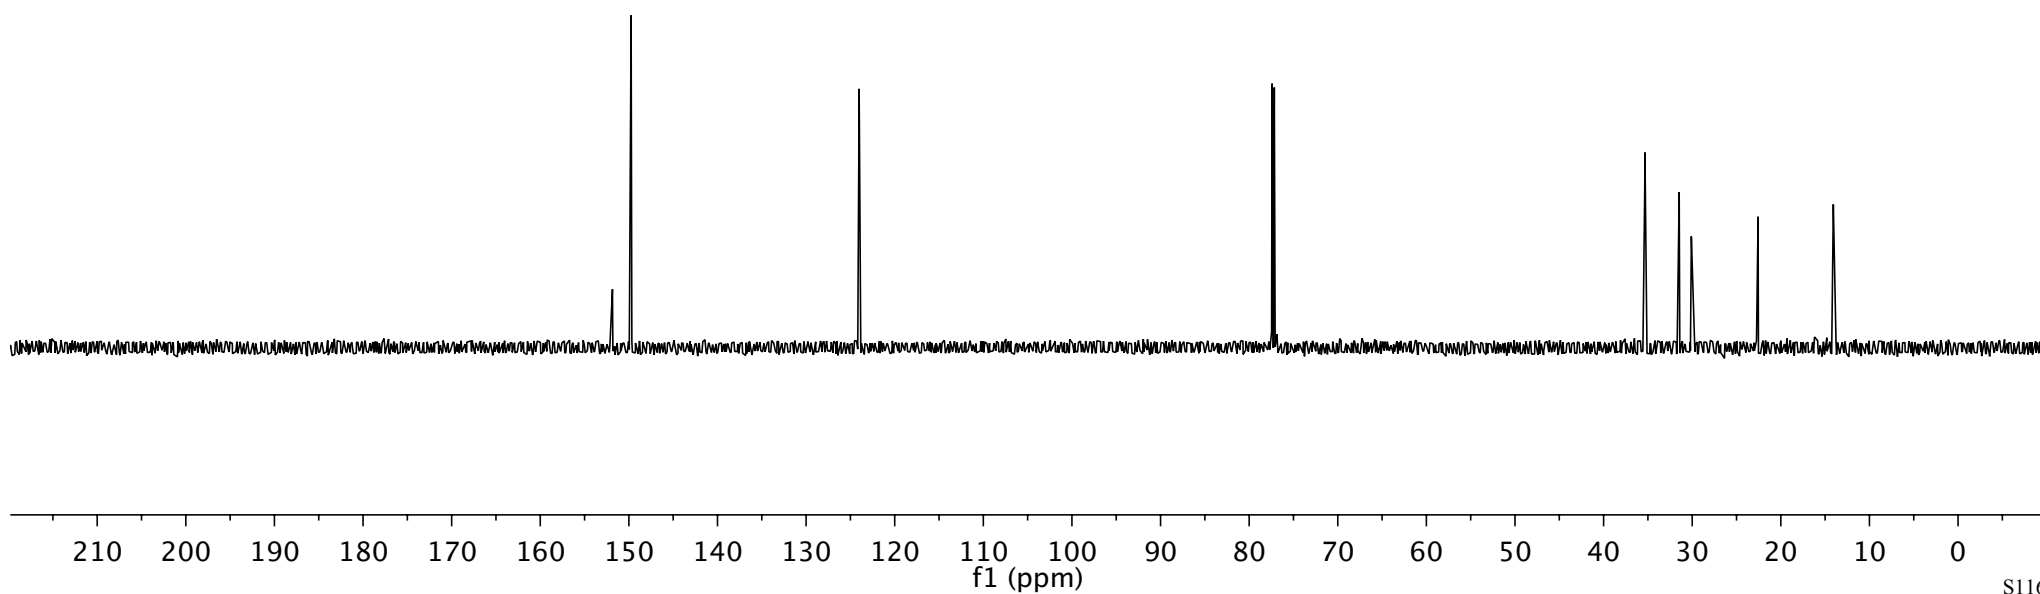

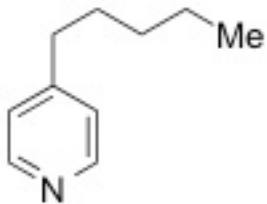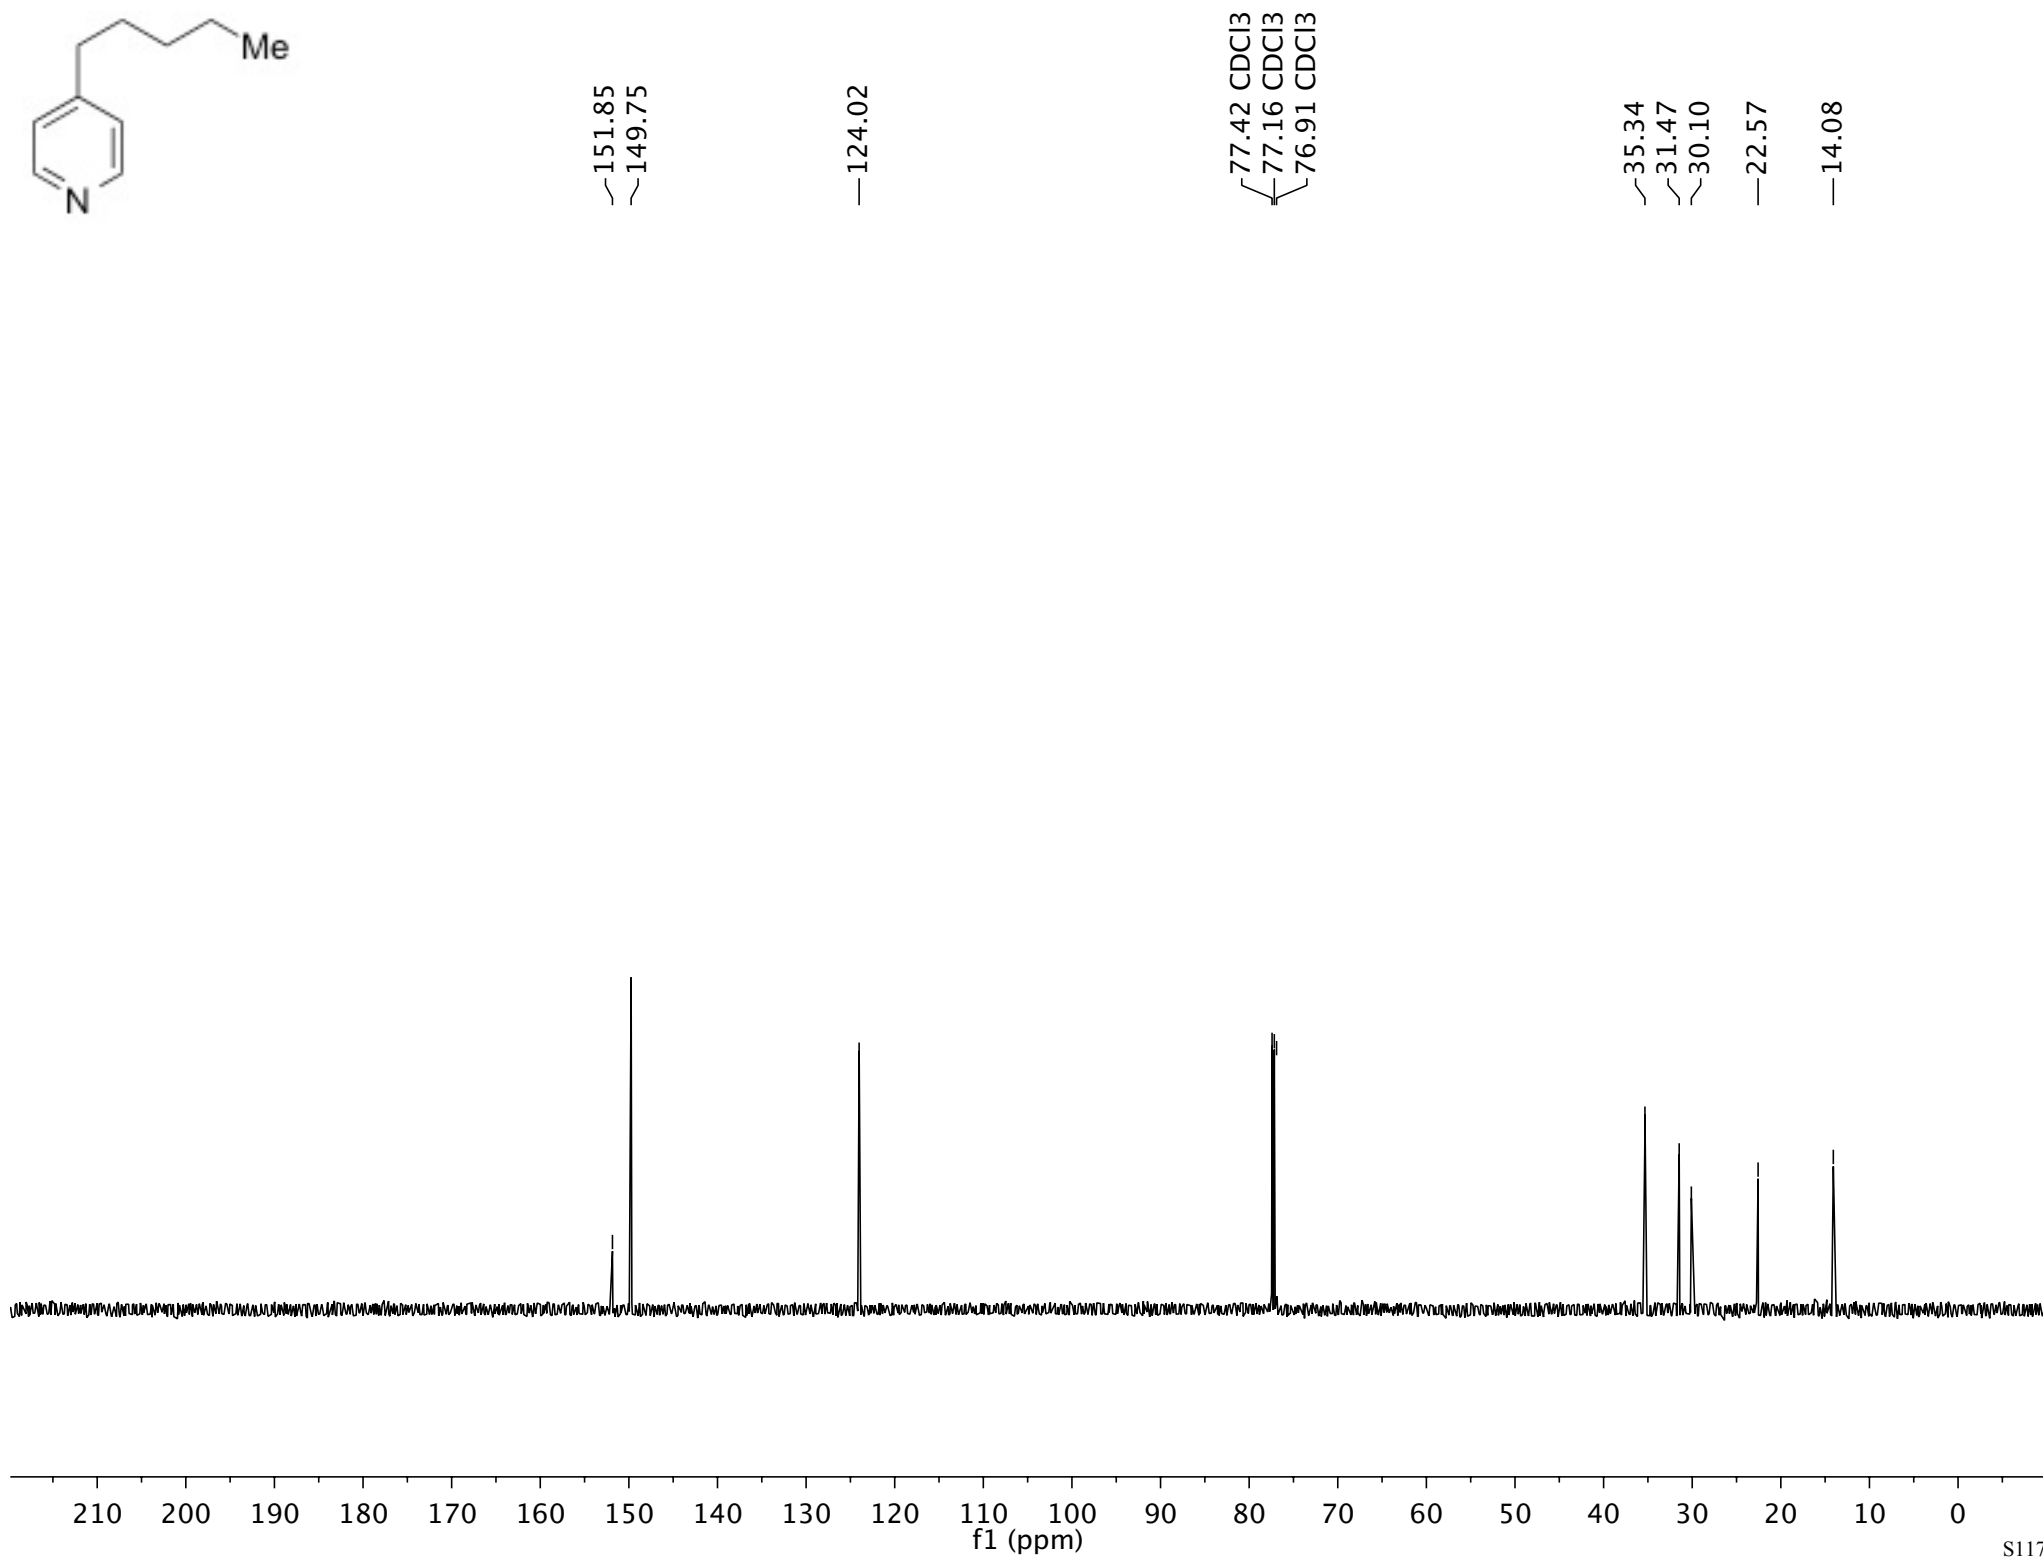

| Parameter              | Value   |
|------------------------|---------|
| Origin                 | Varian  |
| Spectrometer           | inova   |
| Solvent                | CDCl3   |
| Temperature            | 20.0    |
| Pulse Sequence         | s2pul   |
| Experiment             | 1D      |
| Probe                  | QUADG   |
| Receiver Gain          | 50      |
| Relaxation Delay       | 0.0000  |
| Pulse Width            | 0.0000  |
| Acquisition Time       | 4.0960  |
| Spectrometer Frequency | 499.43  |
| Spectral Width         | 8000.0  |
| Lowest Frequency       | -1519.2 |
| Nucleus                | 1H      |
| Acquired Size          | 32768   |
| Spectral Size          | 65536   |

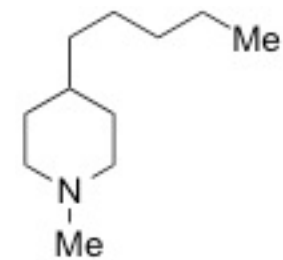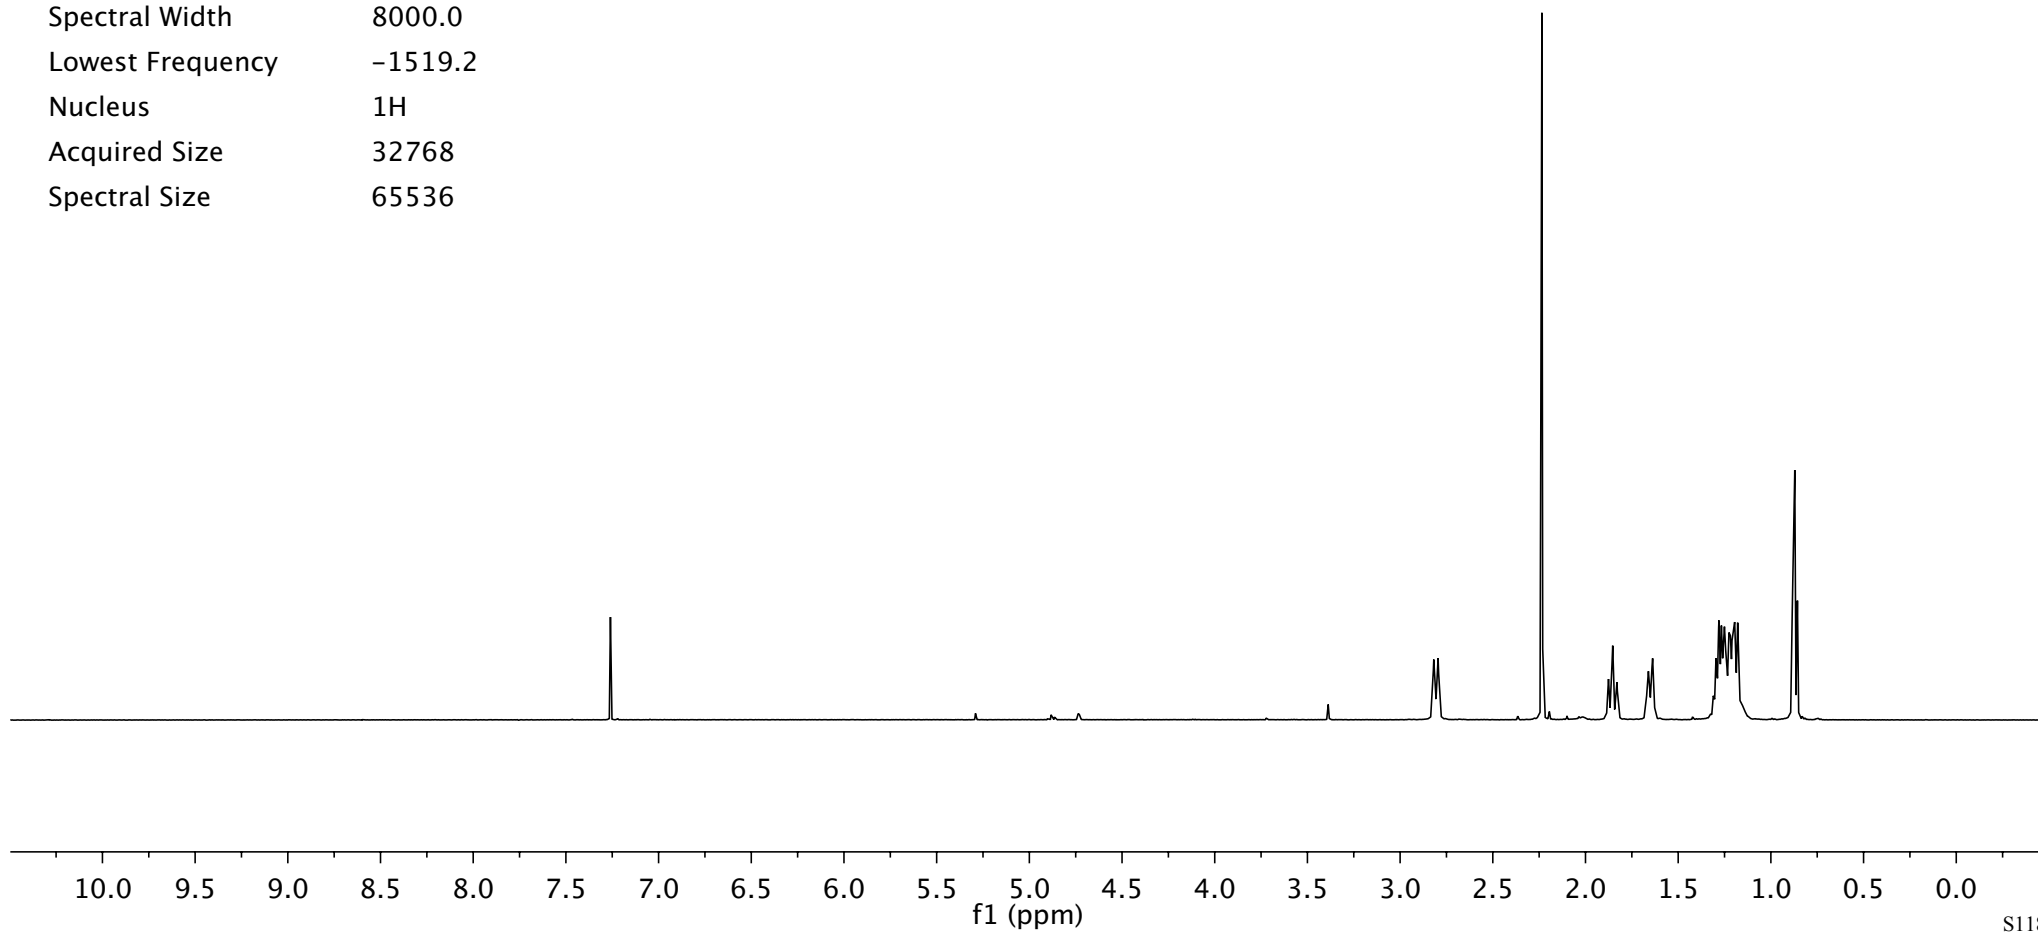

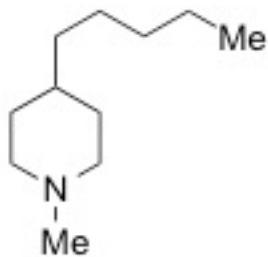

—7.26 CDCl<sub>3</sub>

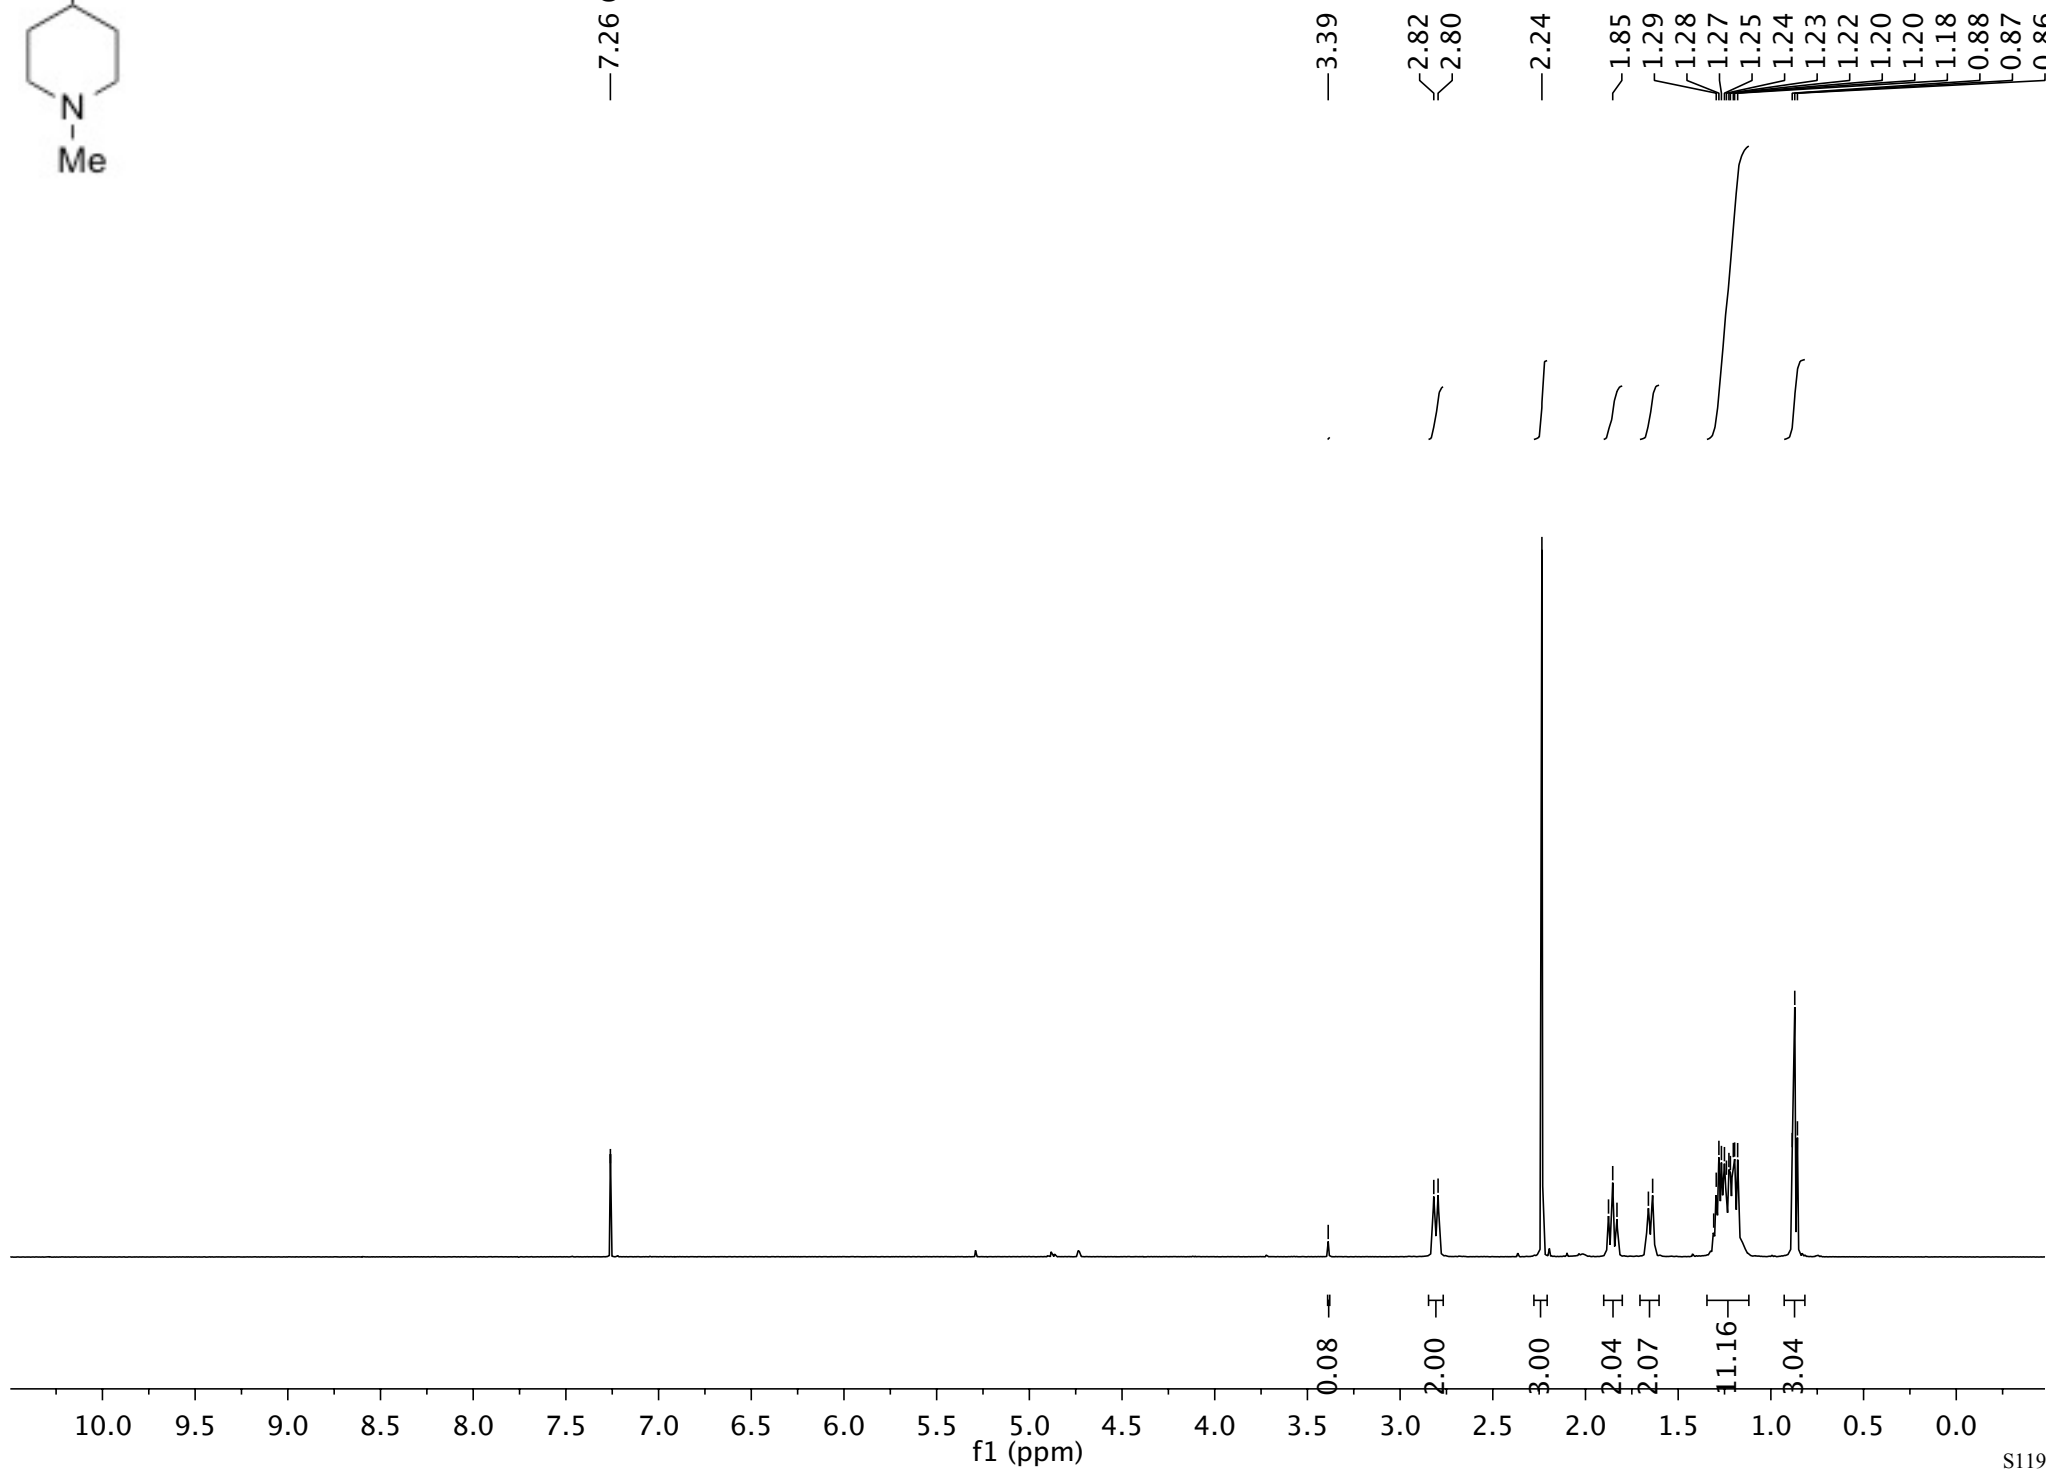



| Parameter              | Value           |
|------------------------|-----------------|
| Origin                 | Varian          |
| Spectrometer           | inova           |
| Solvent                | CDCl3           |
| Temperature            | 20.0            |
| Pulse Sequence         | s2pul           |
| Experiment             | 1D              |
| Probe                  | QUADG           |
| Receiver Gain          | 60              |
| Relaxation Delay       | 2.0000          |
| Pulse Width            | 0.0000          |
| Acquisition Time       | 1.0240          |
| Spectrometer Frequency | 125.60          |
| Spectral Width         | 32000.0         |
| Lowest Frequency       | -2200.1         |
| Nucleus                | <sup>13</sup> C |
| Acquired Size          | 32768           |
| Spectral Size          | 65536           |

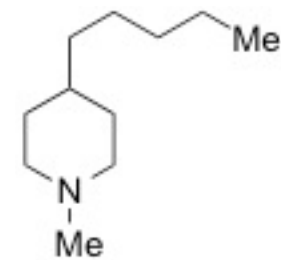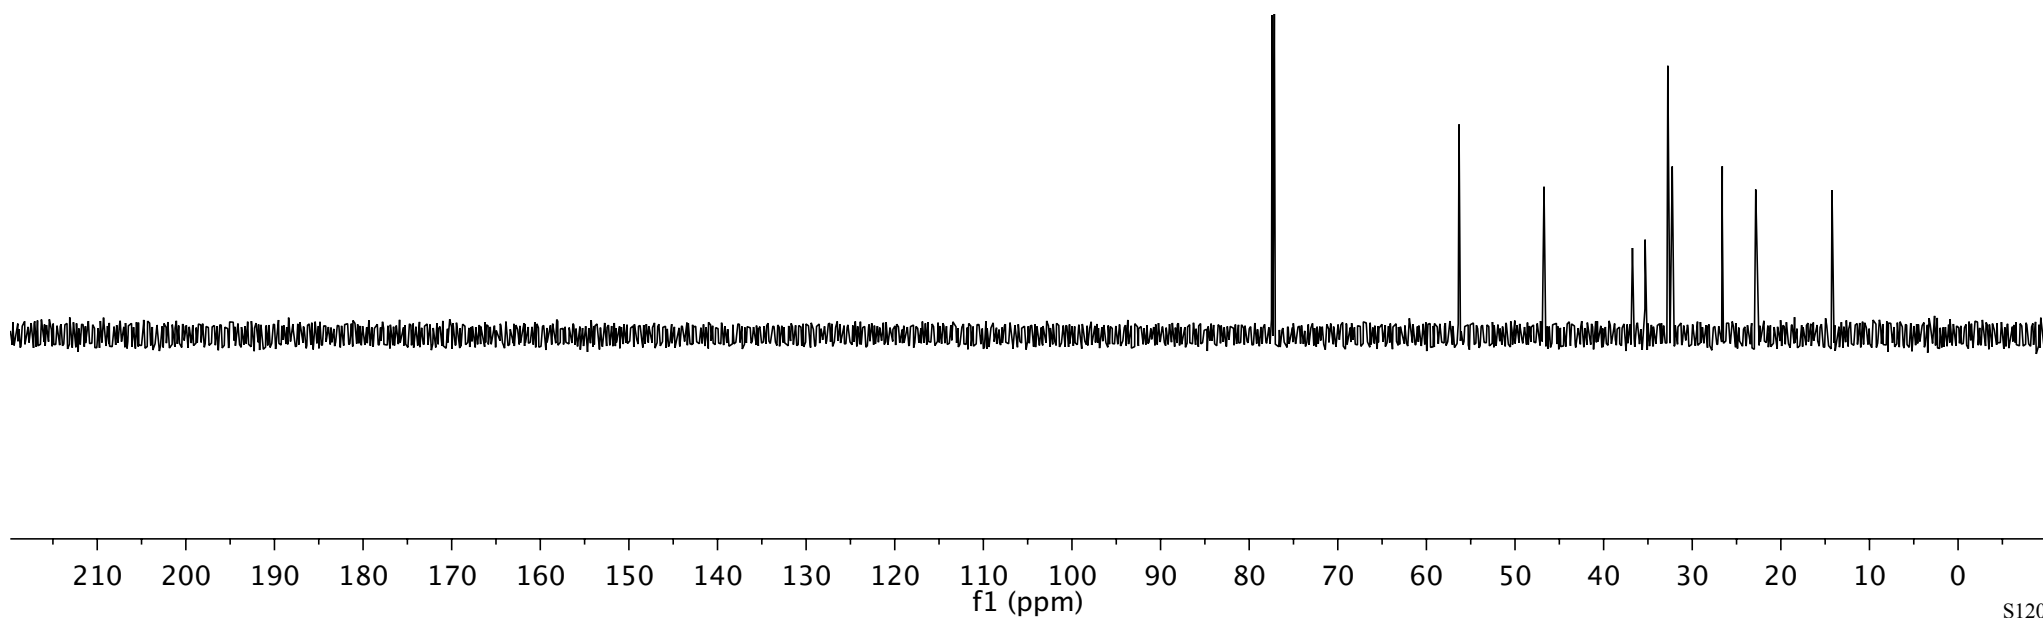

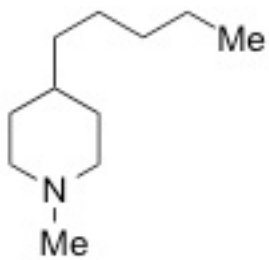

77.41 CDCl<sub>3</sub>  
77.16 CDCl<sub>3</sub>  
76.91 CDCl<sub>3</sub>

—56.32

—46.73

36.75

—35.32

32.75

32.26

26.61

22.83

—14.22

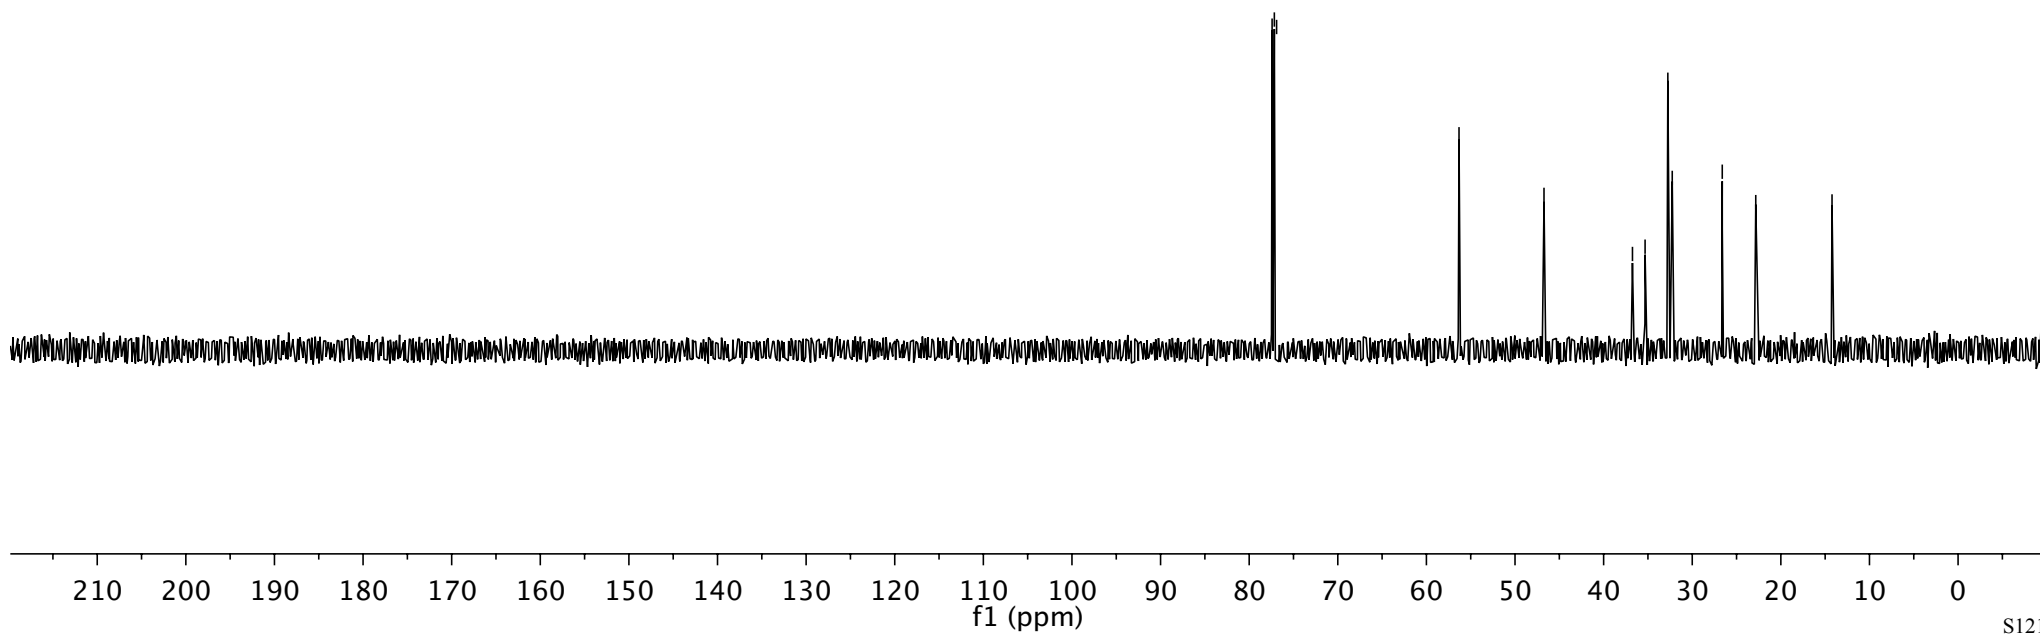

| Parameter              | Value          |
|------------------------|----------------|
| Origin                 | Varian         |
| Spectrometer           | inova          |
| Solvent                | CDCl3          |
| Temperature            | 20.0           |
| Pulse Sequence         | s2pul          |
| Experiment             | 1D             |
| Probe                  | hcn            |
| Number of Scans        | 16             |
| Receiver Gain          | 26             |
| Relaxation Delay       | 10.0000        |
| Pulse Width            | 0.0000         |
| Acquisition Time       | 4.0960         |
| Spectrometer Frequency | 500.07         |
| Spectral Width         | 8000.0         |
| Lowest Frequency       | -1511.1        |
| Nucleus                | <sup>1</sup> H |
| Acquired Size          | 32768          |
| Spectral Size          | 65536          |

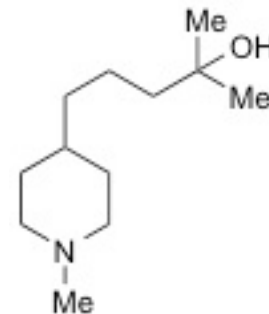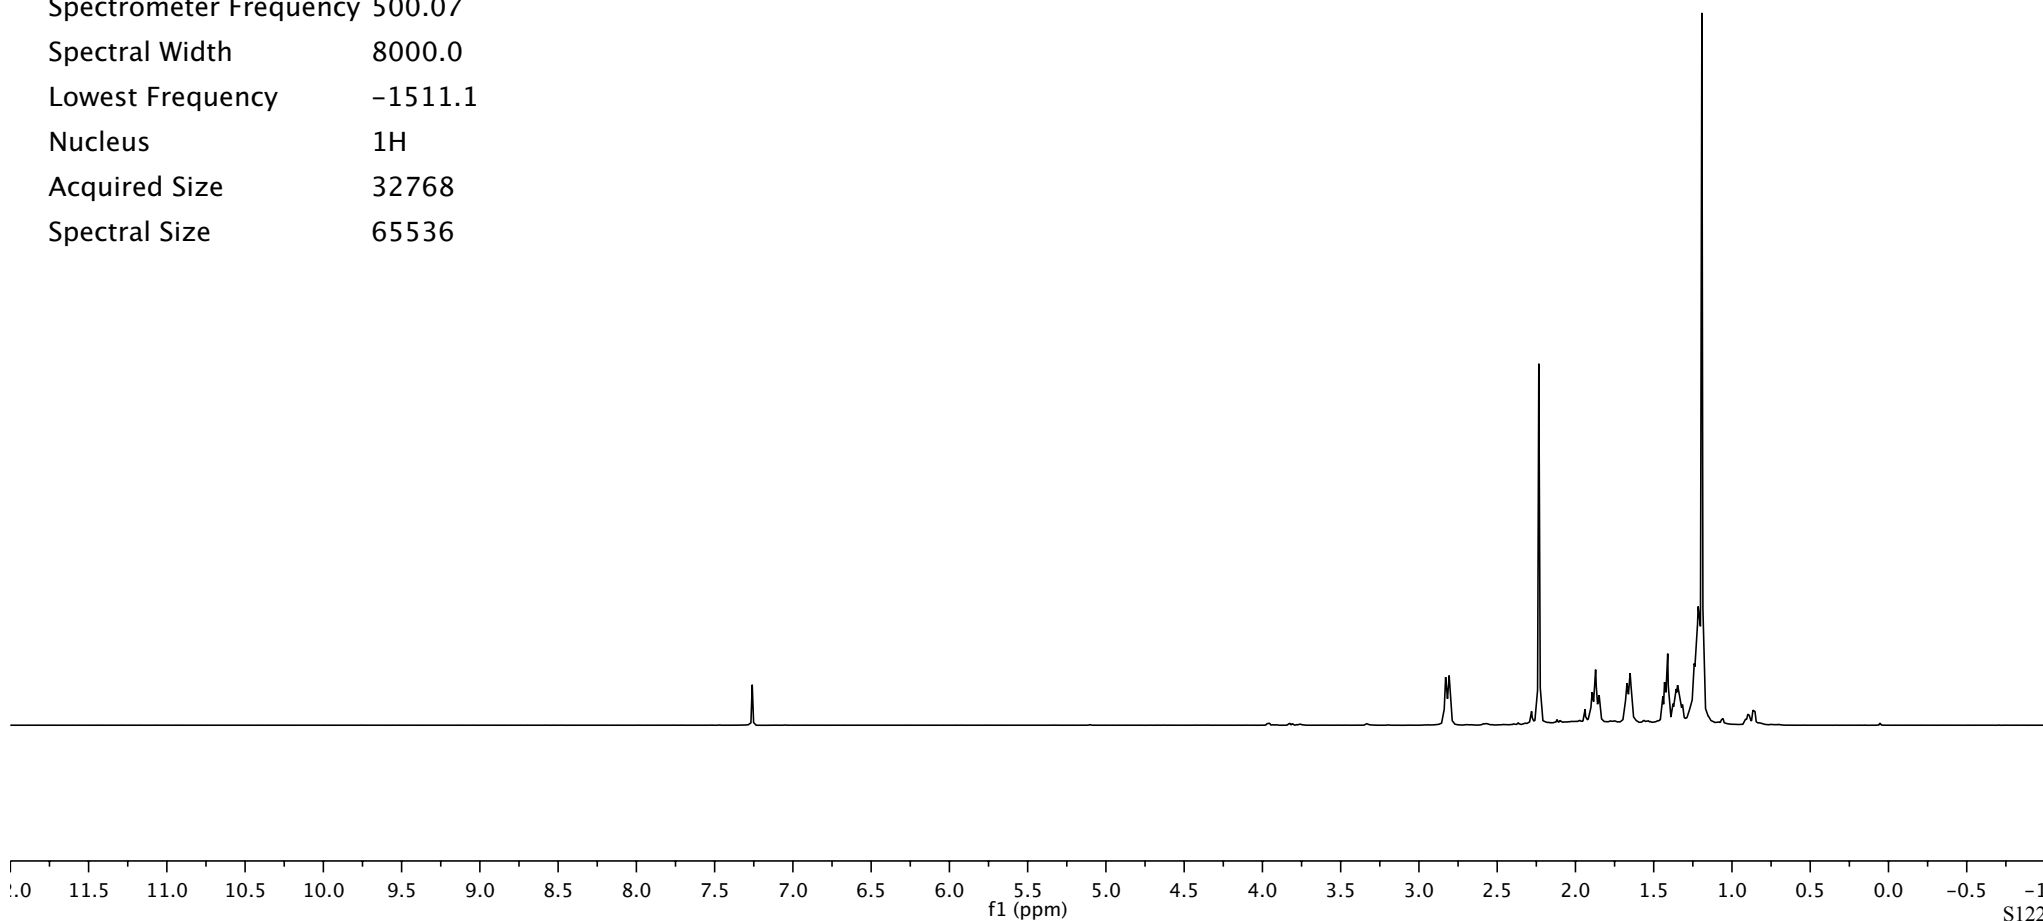

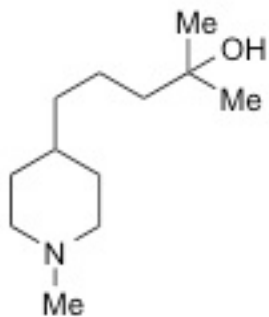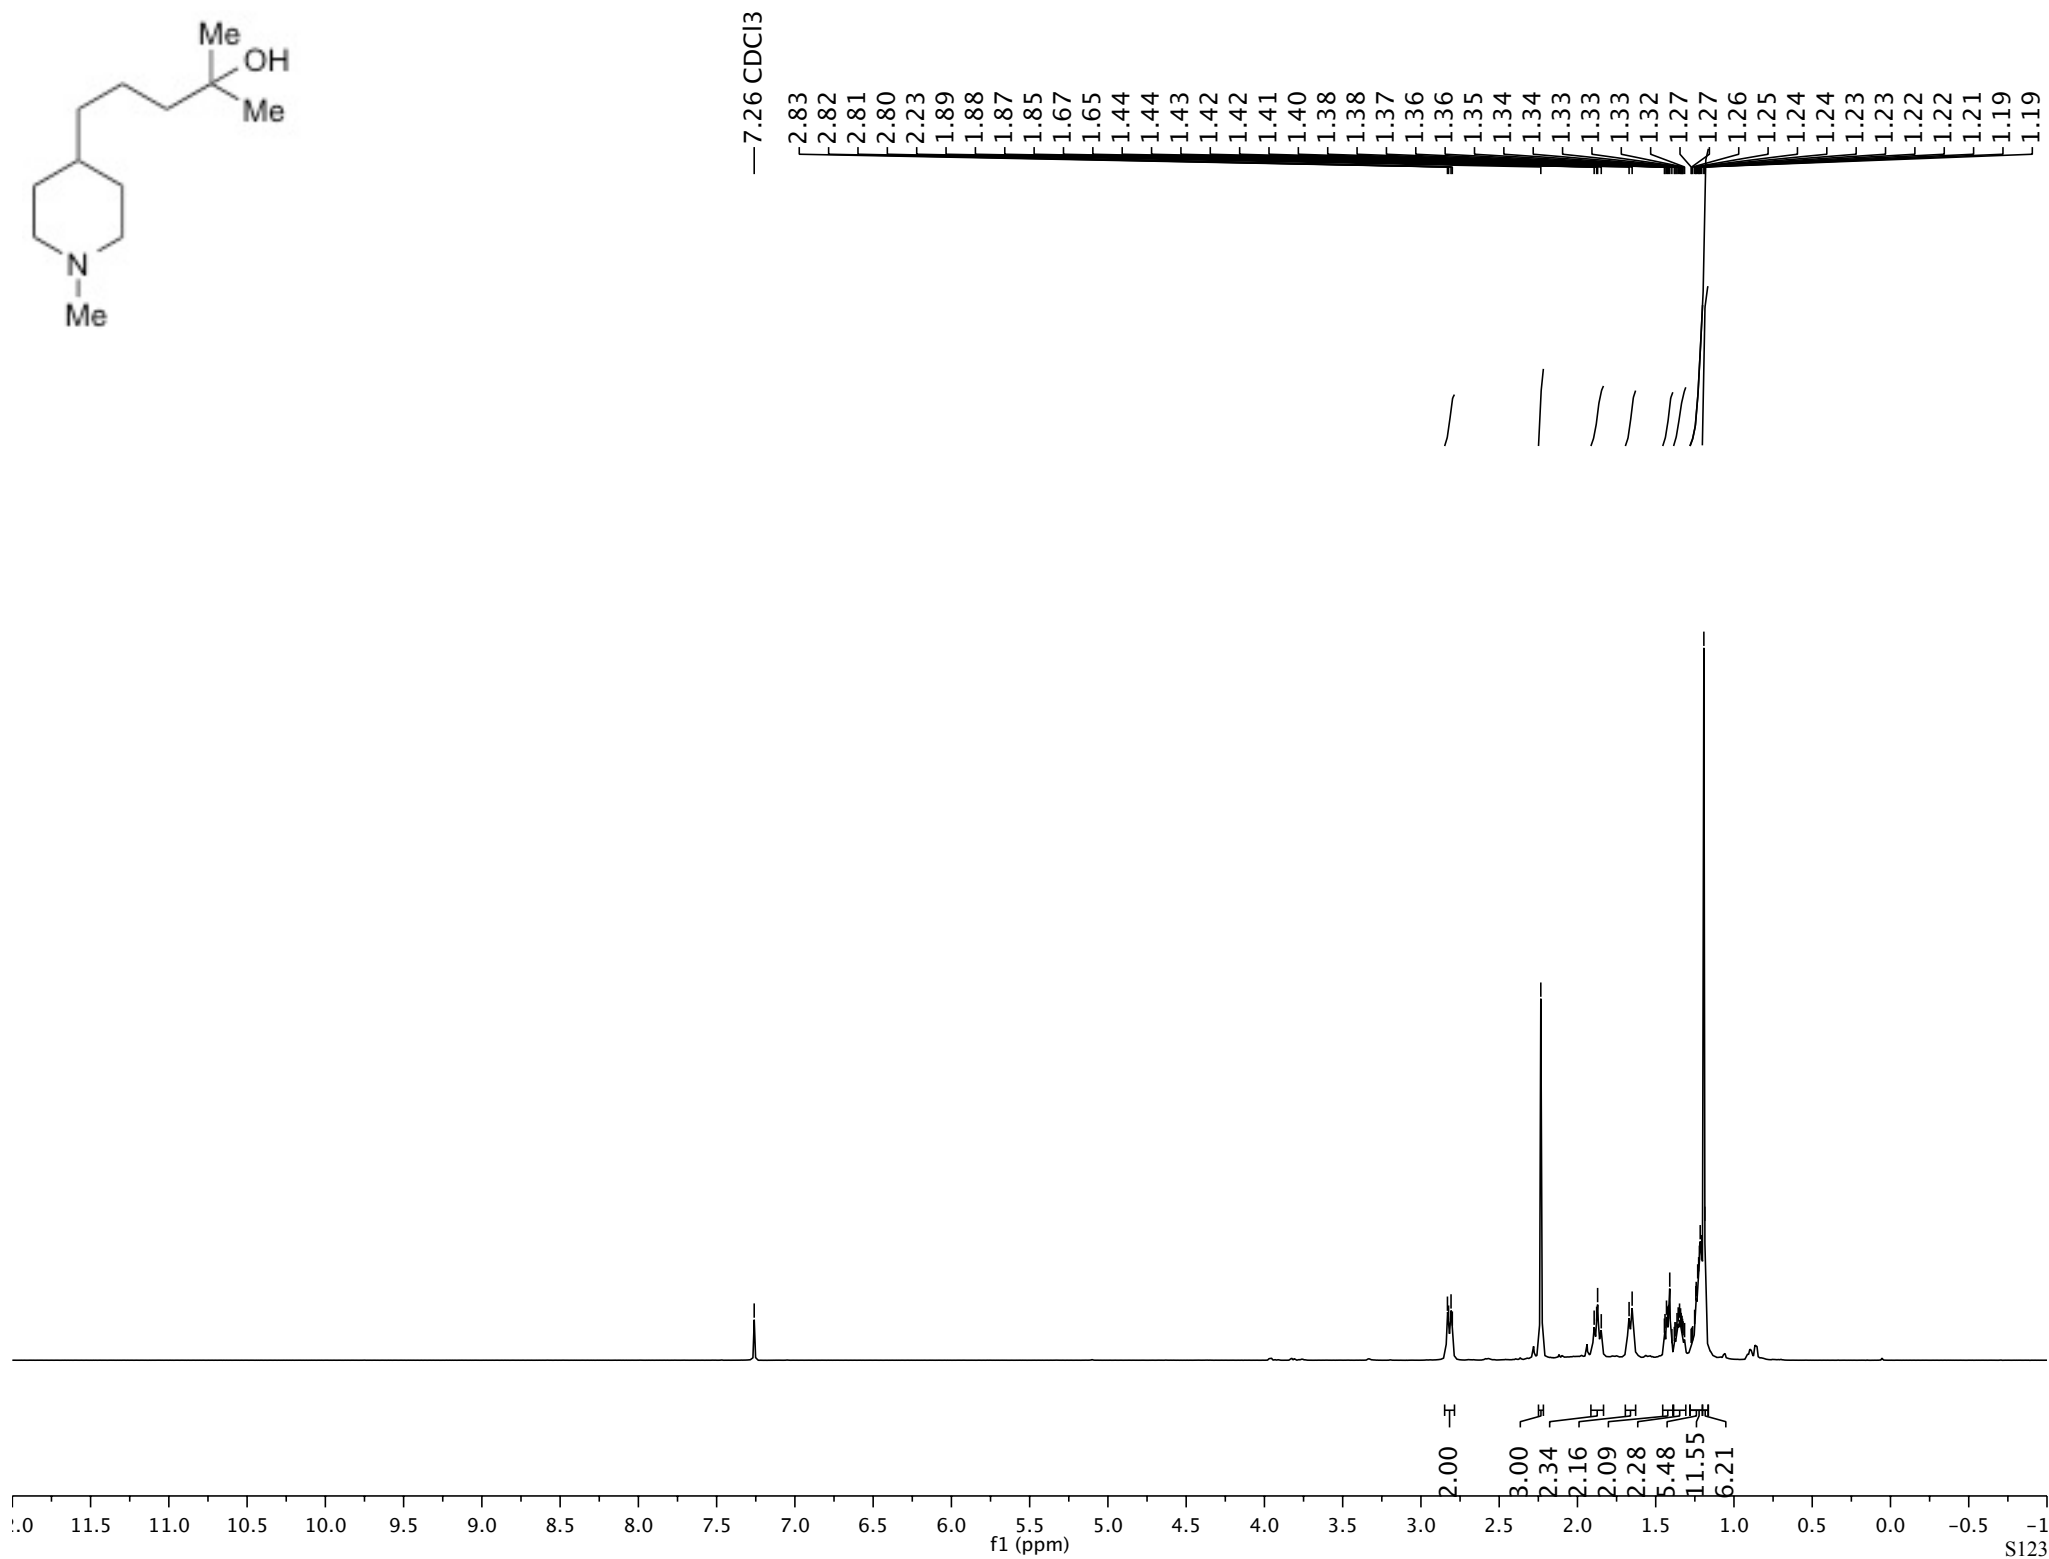

| Parameter              | Value   |
|------------------------|---------|
| Origin                 | Varian  |
| Spectrometer           | inova   |
| Solvent                | CDCl3   |
| Temperature            | 20.0    |
| Pulse Sequence         | s2pul   |
| Experiment             | 1D      |
| Probe                  | QUAD    |
| Number of Scans        | 512     |
| Receiver Gain          | 60      |
| Relaxation Delay       | 2.0000  |
| Pulse Width            | 0.0000  |
| Acquisition Time       | 1.0863  |
| Spectrometer Frequency | 125.66  |
| Spectral Width         | 30165.9 |
| Lowest Frequency       | -1271.8 |
| Nucleus                | 13C     |
| Acquired Size          | 32768   |
| Spectral Size          | 65536   |

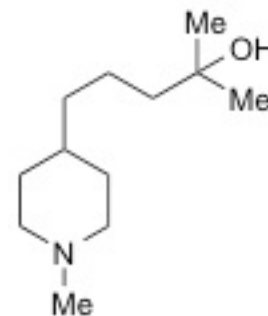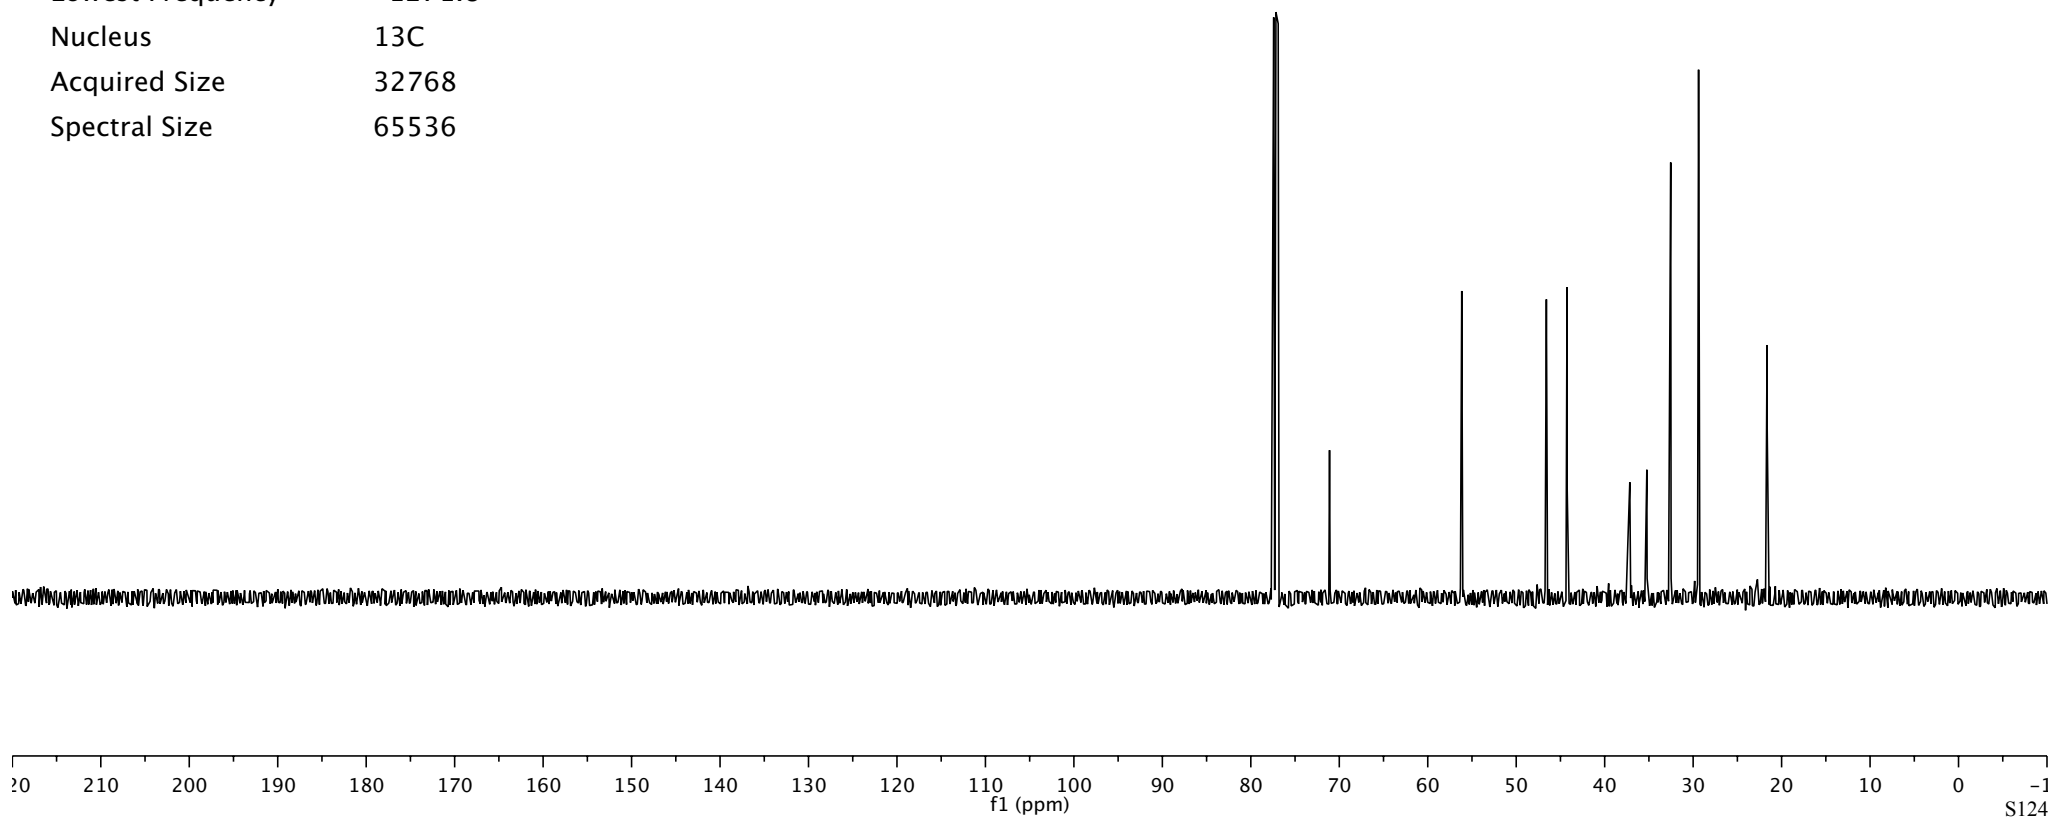

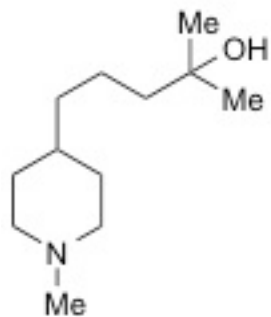

—71.10  
—56.16  
~46.59  
~44.25  
~37.16  
~35.23  
~32.54  
~29.38  
—21.64

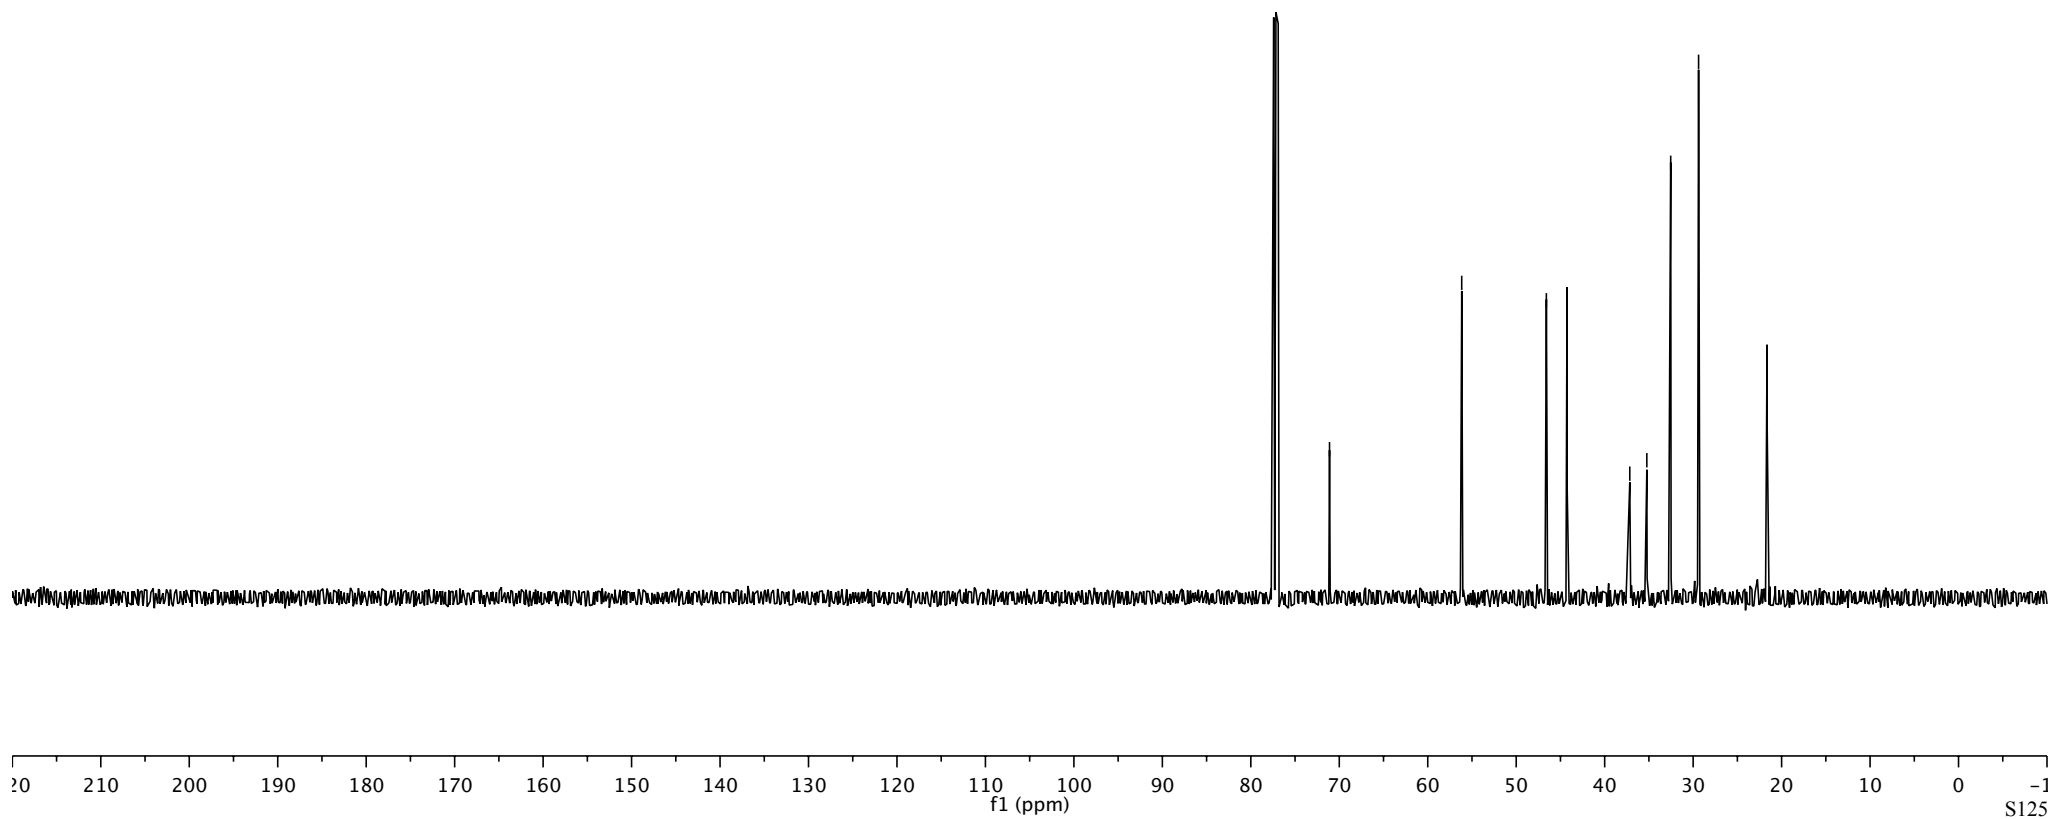

| Parameter              | Value   |
|------------------------|---------|
| Origin                 | Varian  |
| Spectrometer           | inova   |
| Solvent                | CDCl3   |
| Temperature            | 20.0    |
| Pulse Sequence         | s2pul   |
| Experiment             | 1D      |
| Probe                  | QUADG   |
| Receiver Gain          | 50      |
| Relaxation Delay       | 0.0000  |
| Pulse Width            | 0.0000  |
| Acquisition Time       | 4.0960  |
| Spectrometer Frequency | 499.43  |
| Spectral Width         | 8000.0  |
| Lowest Frequency       | -1518.7 |
| Nucleus                | 1H      |
| Acquired Size          | 32768   |
| Spectral Size          | 65536   |

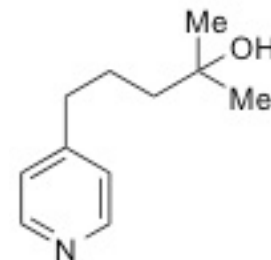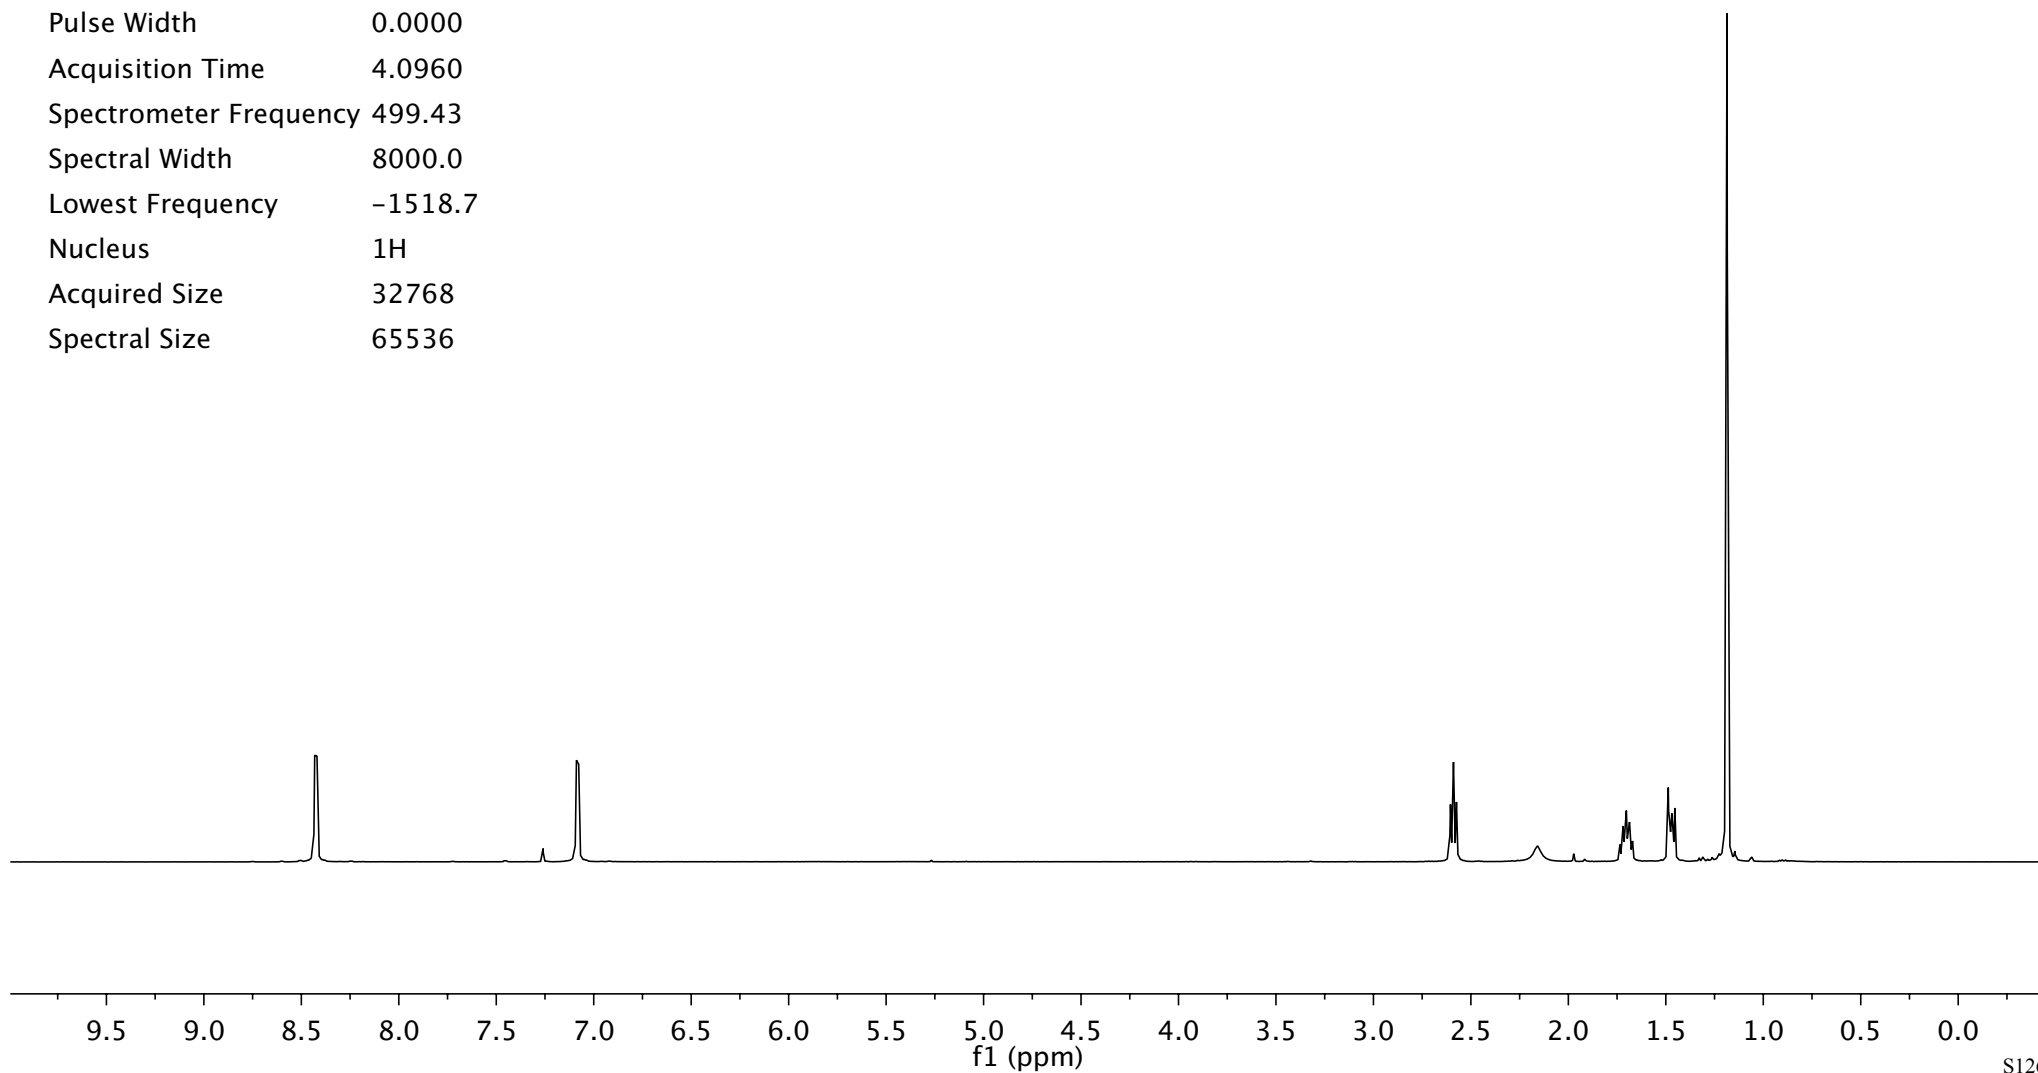

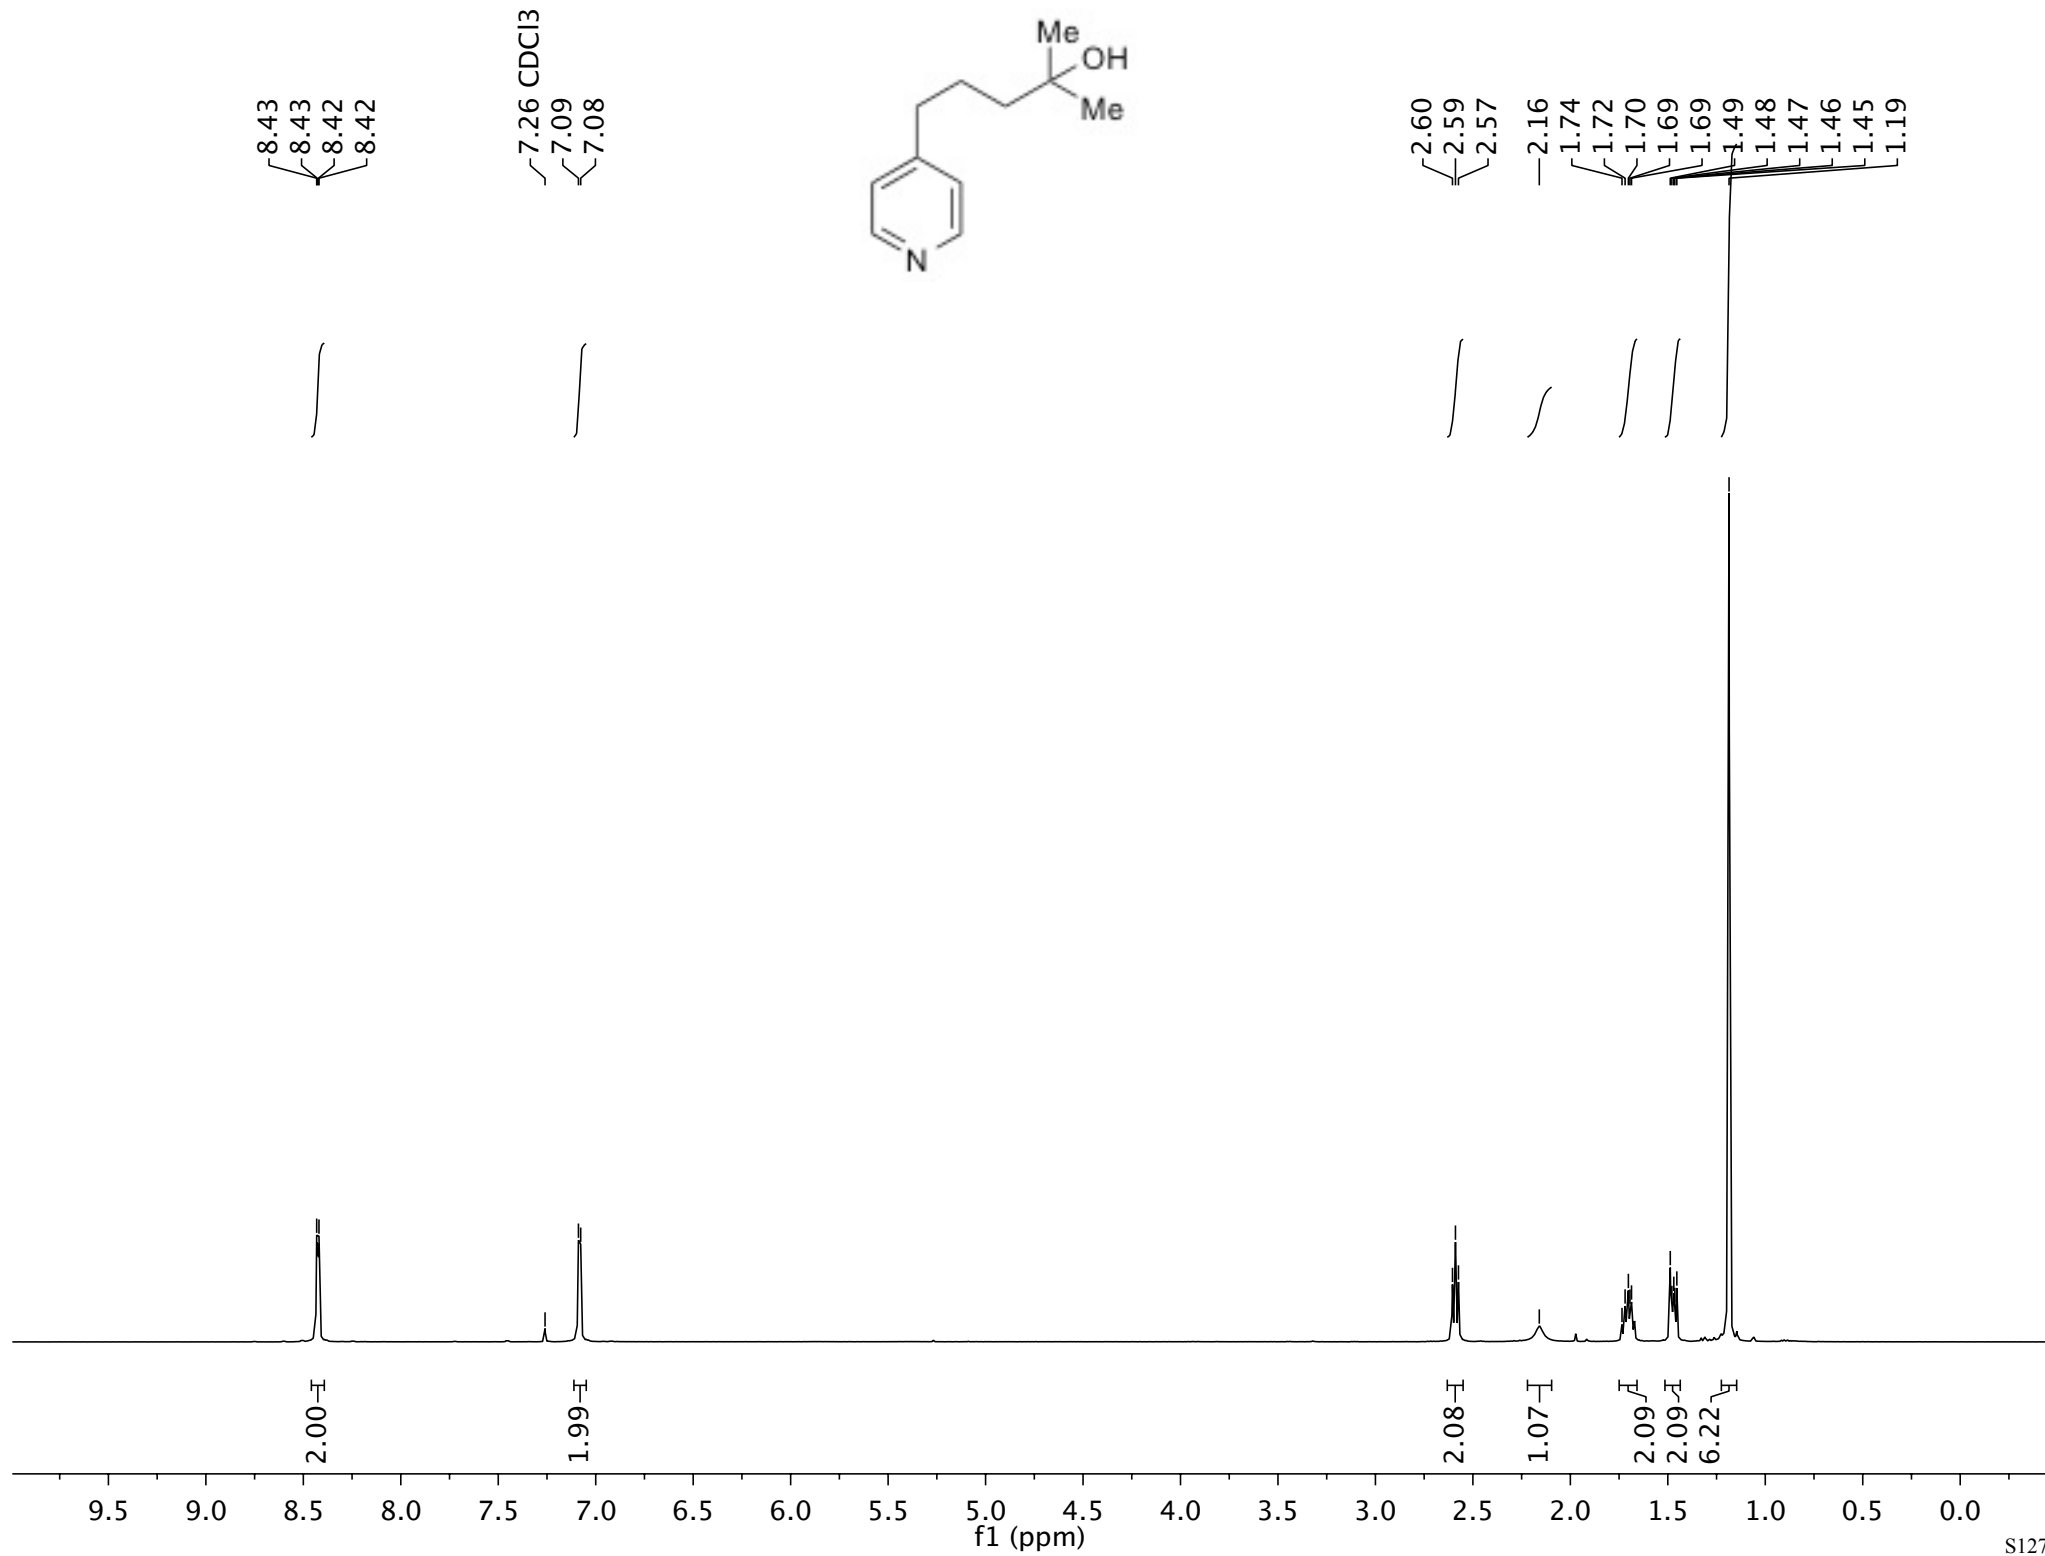



| Parameter              | Value           |
|------------------------|-----------------|
| Origin                 | Varian          |
| Spectrometer           | inova           |
| Solvent                | CDCl3           |
| Temperature            | 20.0            |
| Pulse Sequence         | s2pul           |
| Experiment             | 1D              |
| Probe                  | QUADG           |
| Receiver Gain          | 60              |
| Relaxation Delay       | 1.0000          |
| Pulse Width            | 0.0000          |
| Acquisition Time       | 1.0240          |
| Spectrometer Frequency | 125.60          |
| Spectral Width         | 32000.0         |
| Lowest Frequency       | -2208.6         |
| Nucleus                | <sup>13</sup> C |
| Acquired Size          | 32768           |
| Spectral Size          | 65536           |

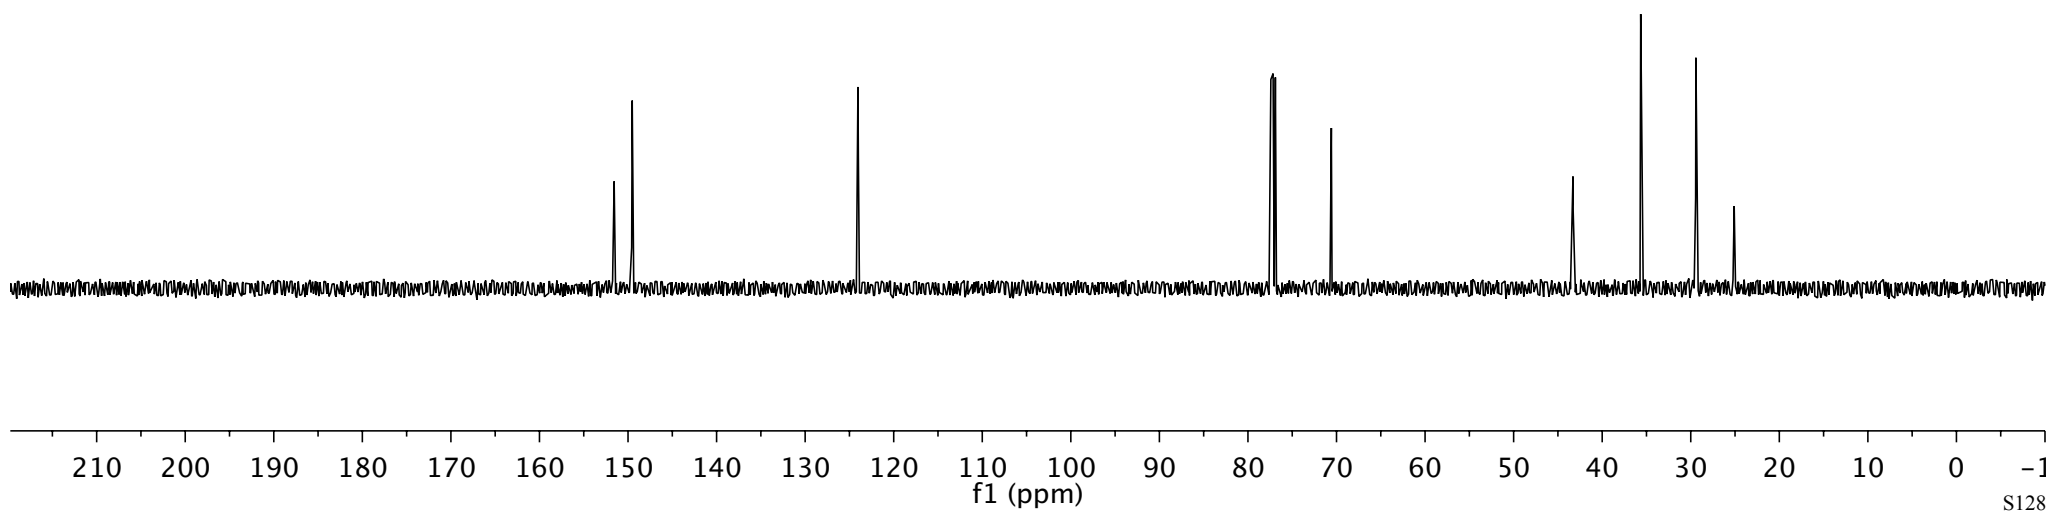

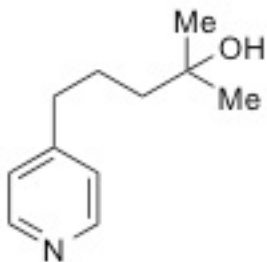

~151.57  
~149.55

—124.02

—77.16 CDCl<sub>3</sub>

—70.58

—43.30

~35.65

~29.40

~25.10

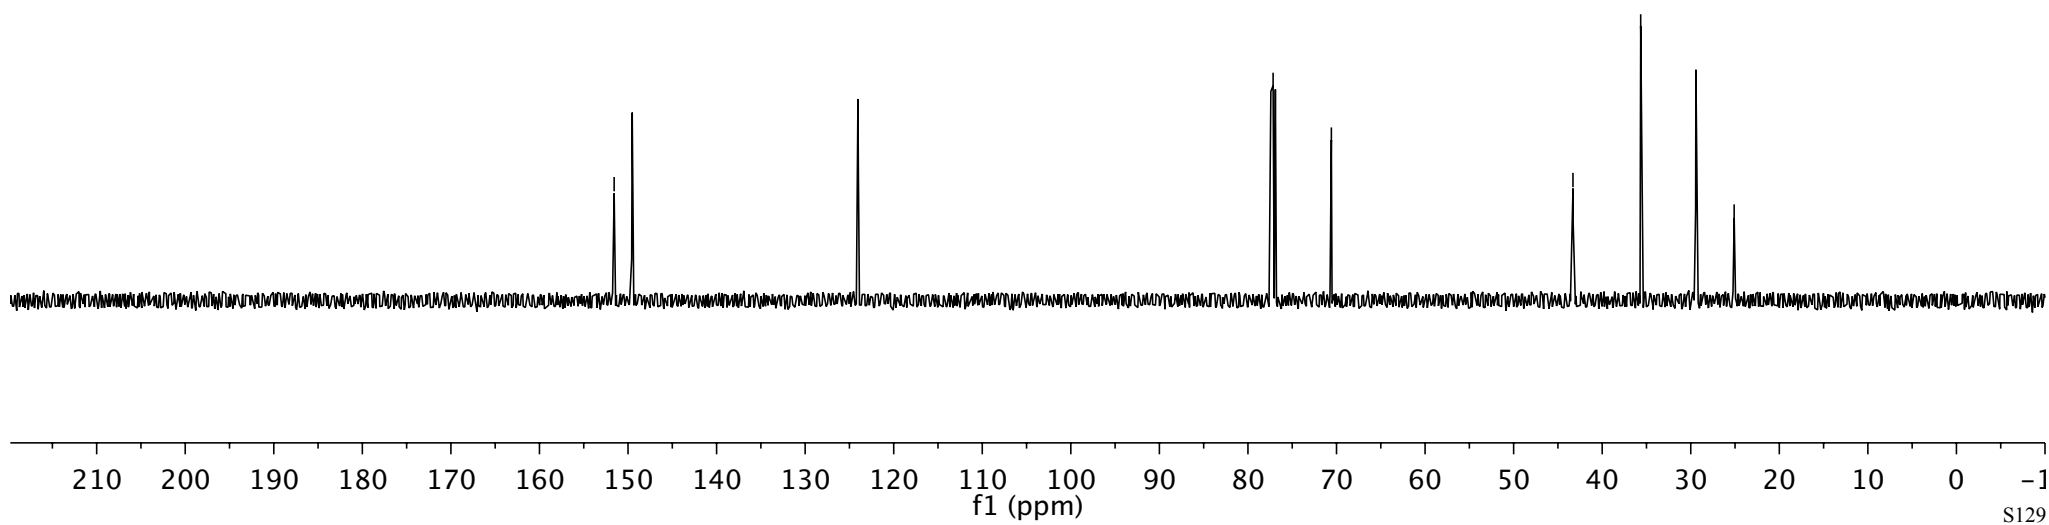

| Parameter              | Value          |
|------------------------|----------------|
| Origin                 | Varian         |
| Spectrometer           | inova          |
| Solvent                | CDCl3          |
| Temperature            | 20.0           |
| Pulse Sequence         | s2pul          |
| Experiment             | 1D             |
| Probe                  | QUAD           |
| Number of Scans        | 16             |
| Receiver Gain          | 46             |
| Relaxation Delay       | 2.0000         |
| Pulse Width            | 0.0000         |
| Acquisition Time       | 4.6645         |
| Spectrometer Frequency | 499.69         |
| Spectral Width         | 7024.9         |
| Lowest Frequency       | -1021.9        |
| Nucleus                | <sup>1</sup> H |
| Acquired Size          | 32768          |
| Spectral Size          | 65536          |

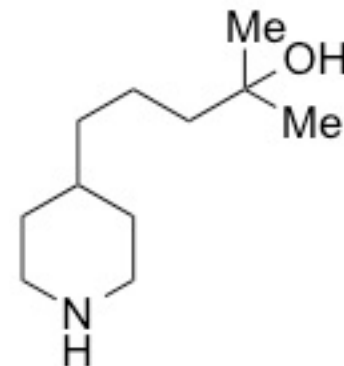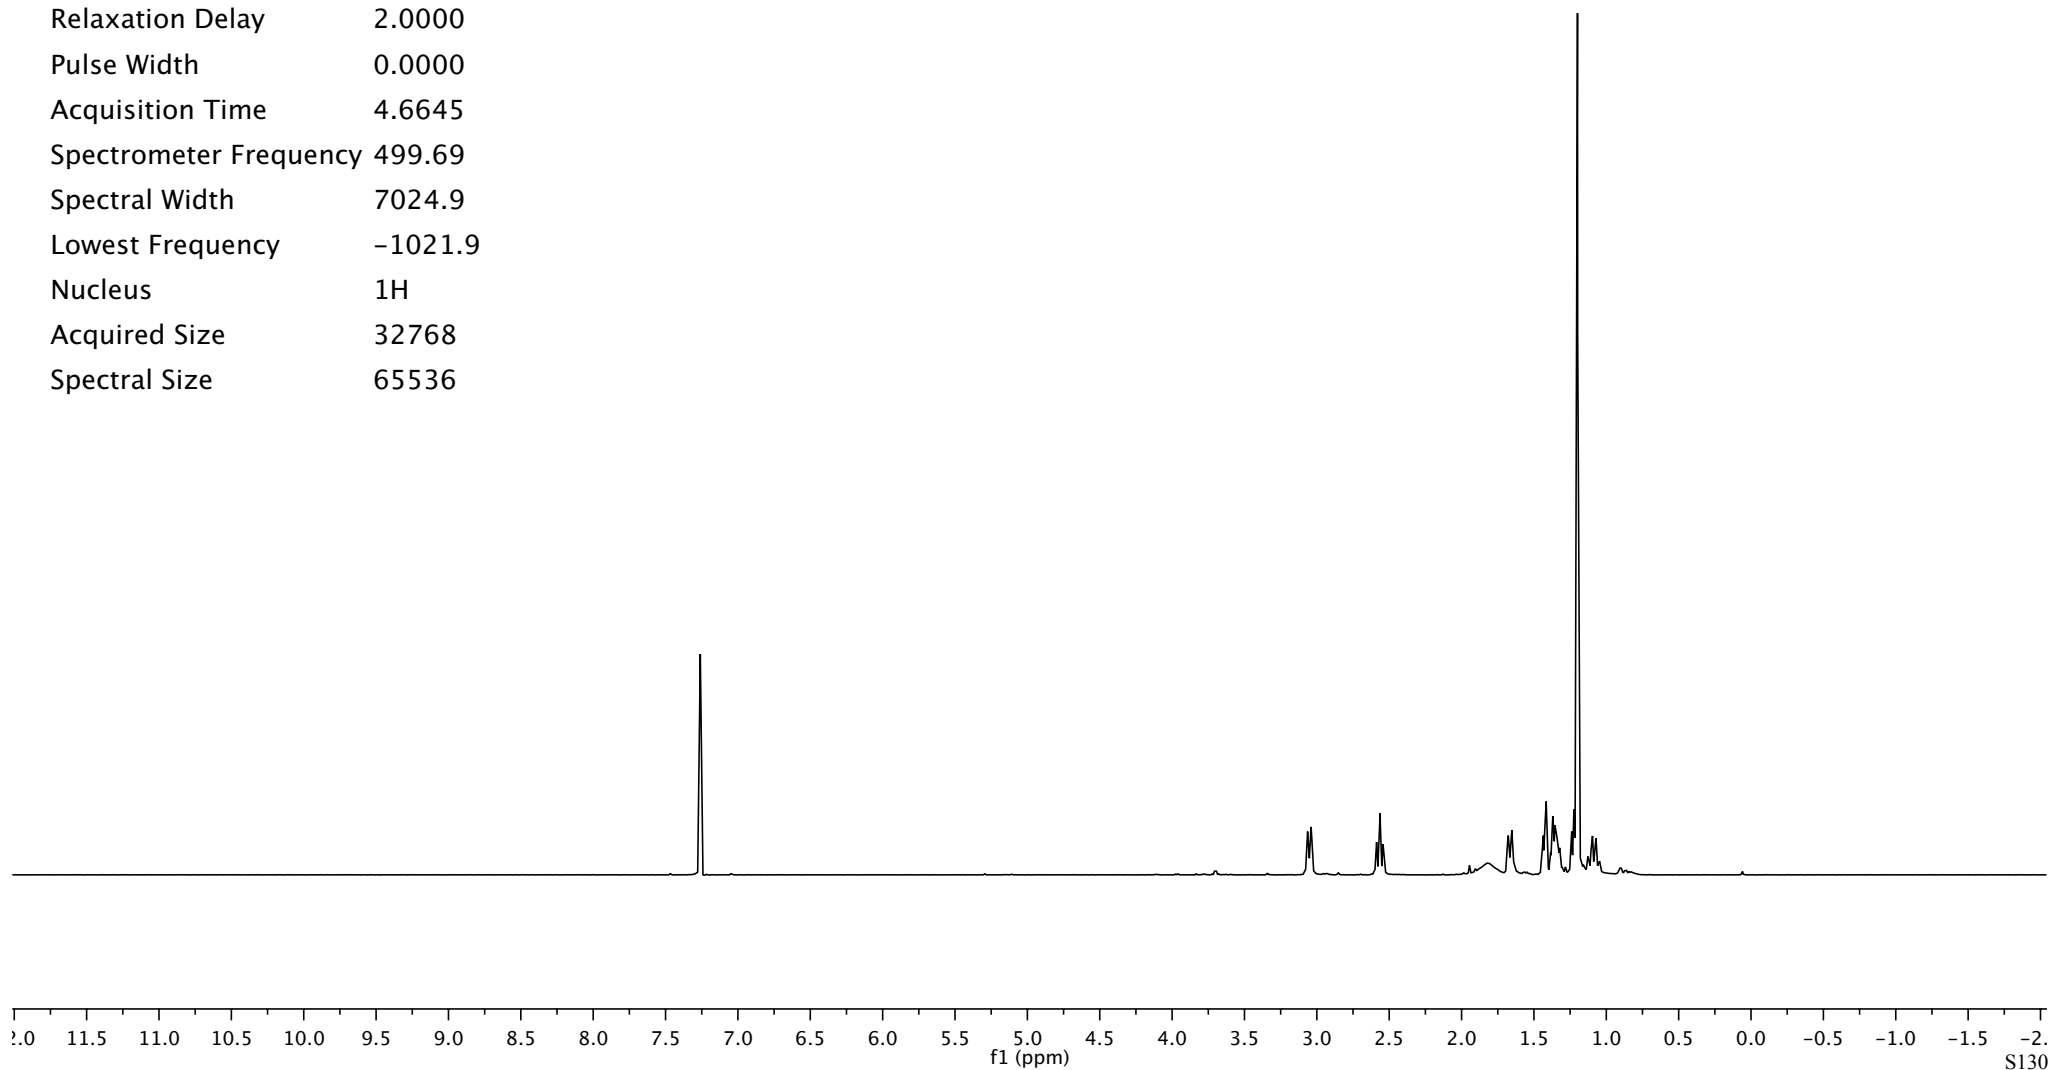

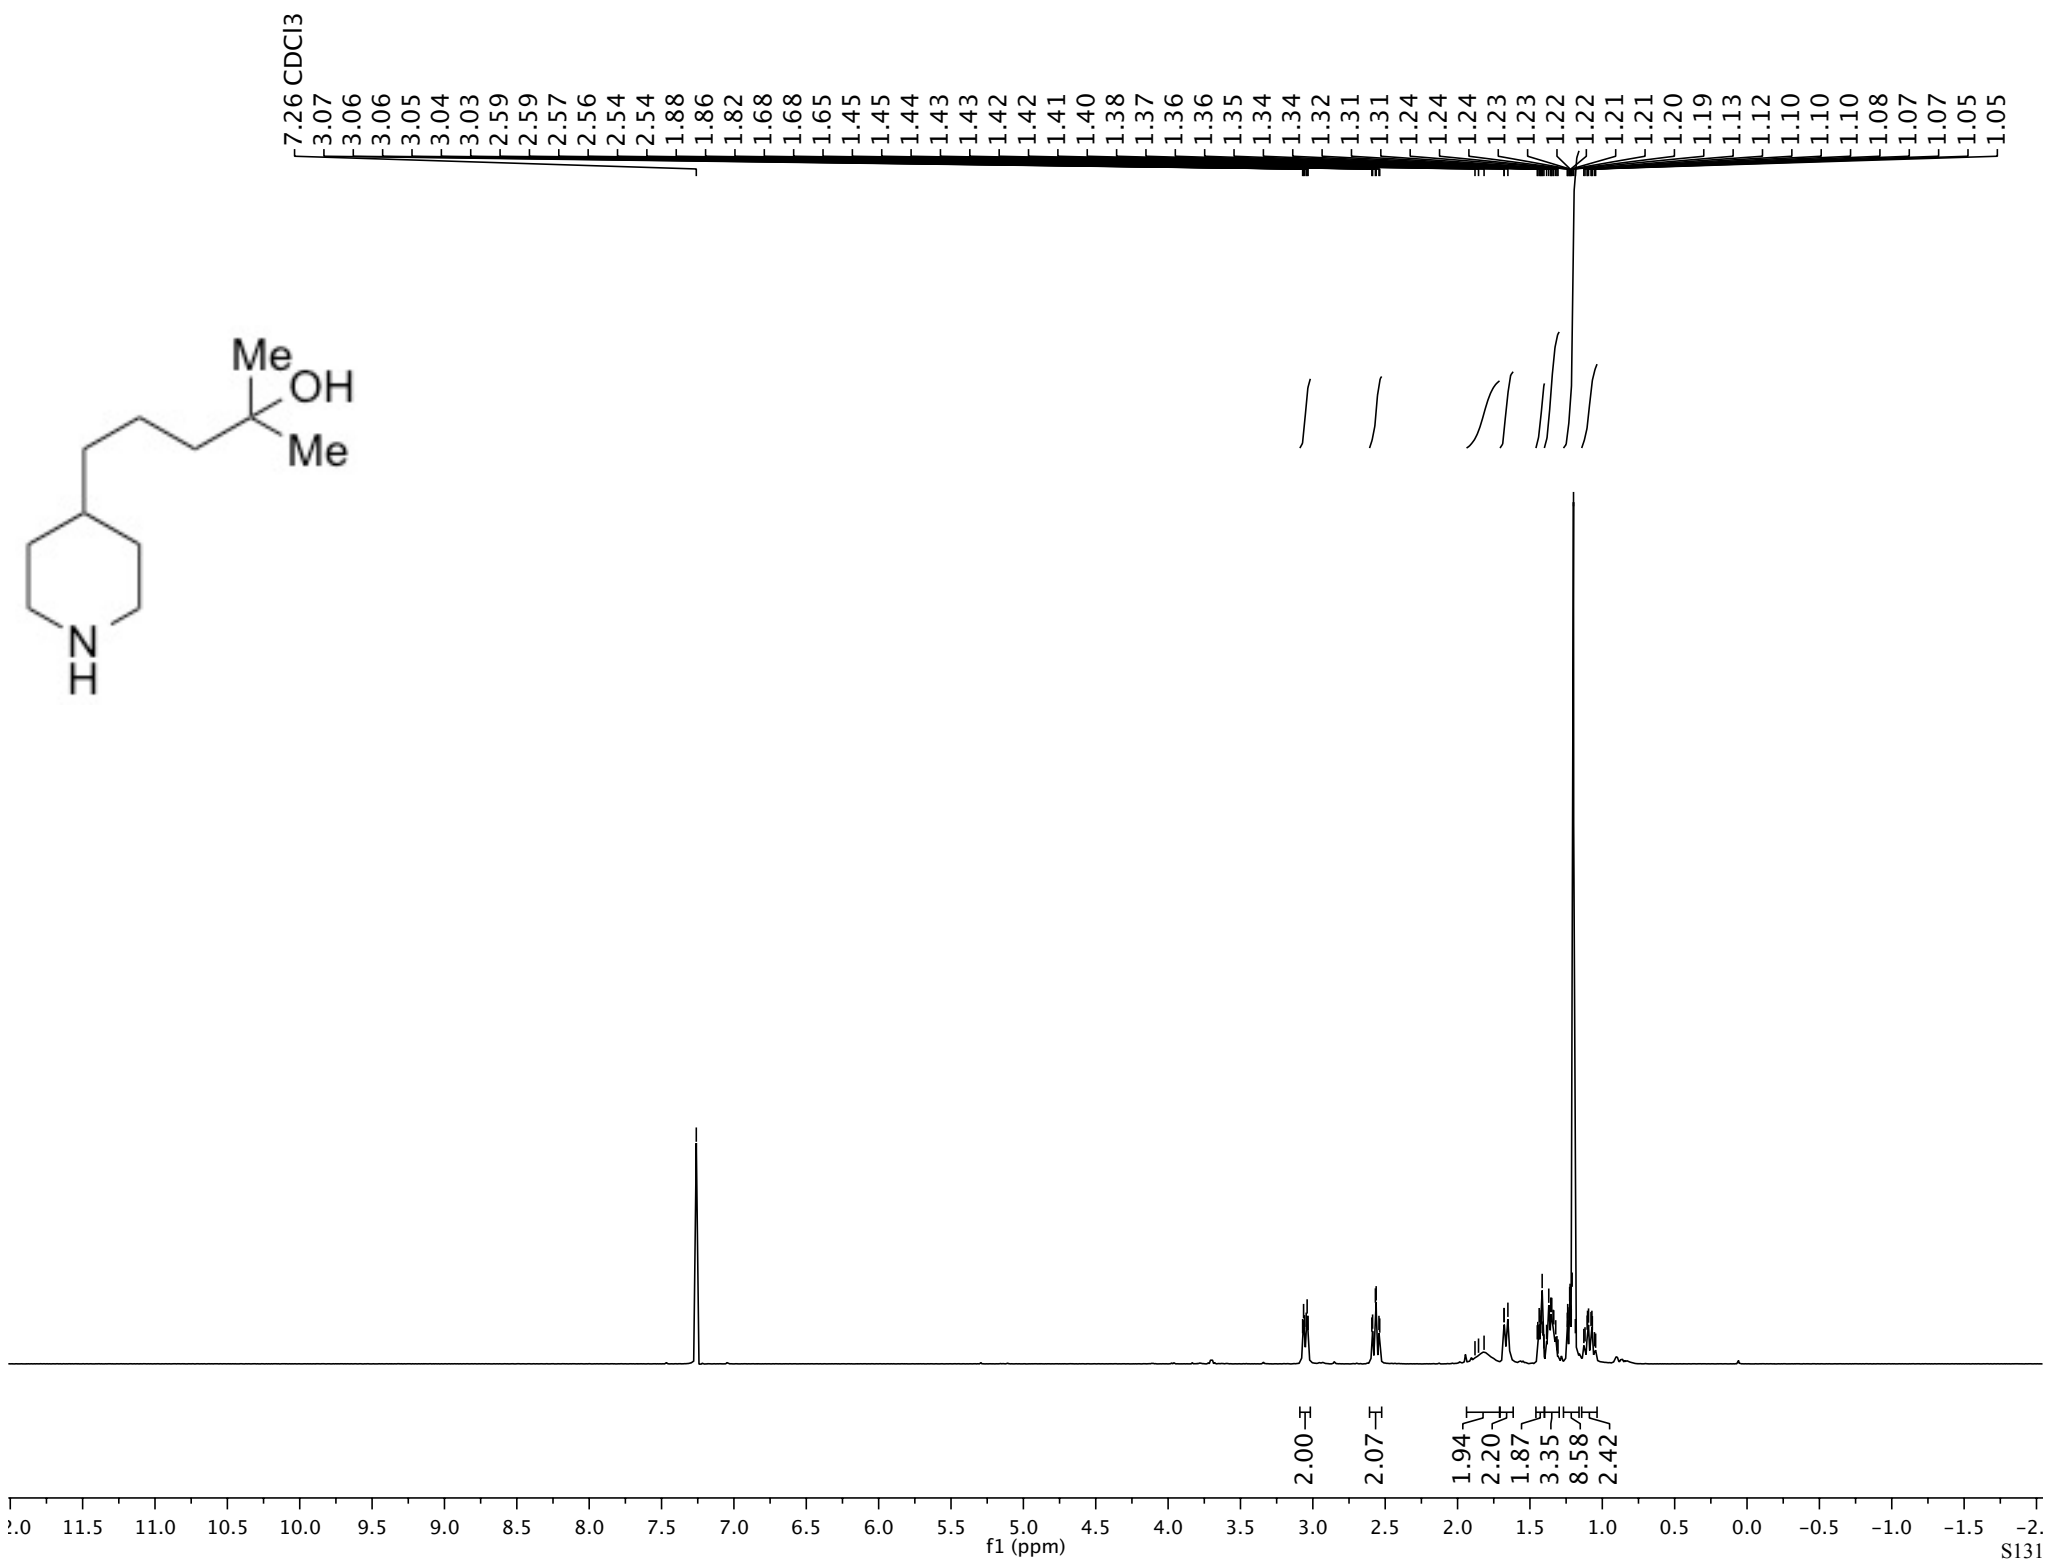

| Parameter              | Value   |
|------------------------|---------|
| Origin                 | Varian  |
| Spectrometer           | inova   |
| Solvent                | CDCl3   |
| Temperature            | 20.0    |
| Pulse Sequence         | s2pul   |
| Experiment             | 1D      |
| Probe                  | QUAD    |
| Number of Scans        | 611     |
| Receiver Gain          | 60      |
| Relaxation Delay       | 2.0000  |
| Pulse Width            | 0.0000  |
| Acquisition Time       | 1.0863  |
| Spectrometer Frequency | 125.66  |
| Spectral Width         | 30165.9 |
| Lowest Frequency       | -1273.1 |
| Nucleus                | 13C     |
| Acquired Size          | 32768   |
| Spectral Size          | 65536   |

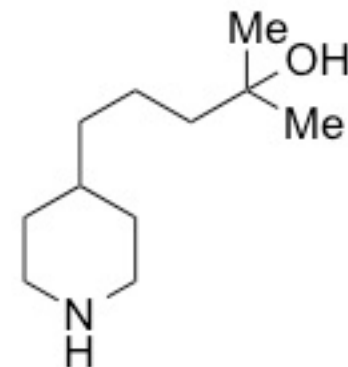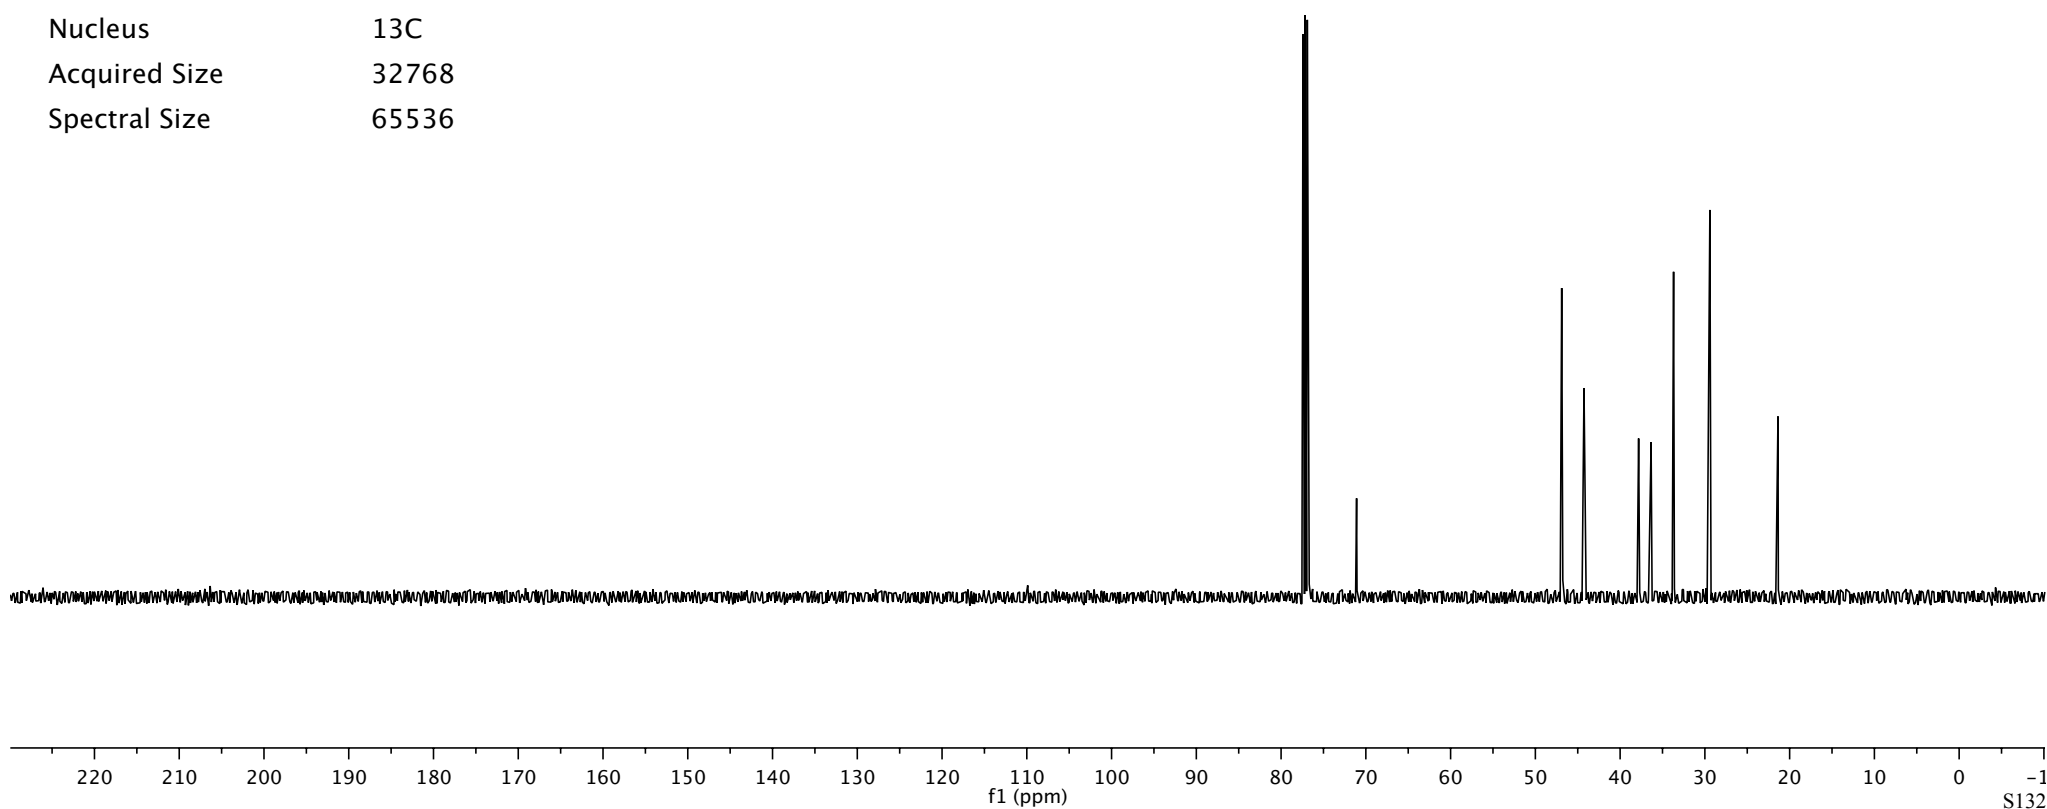

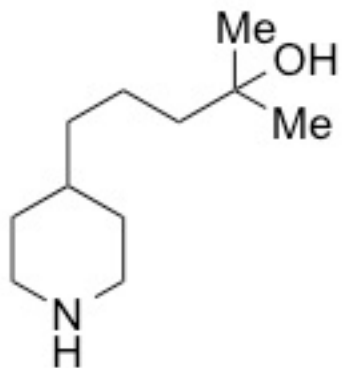

—77.16 CDCl<sub>3</sub>

—71.09

—46.89

—44.26

—37.82

—36.35

—33.69

—29.41

—21.37

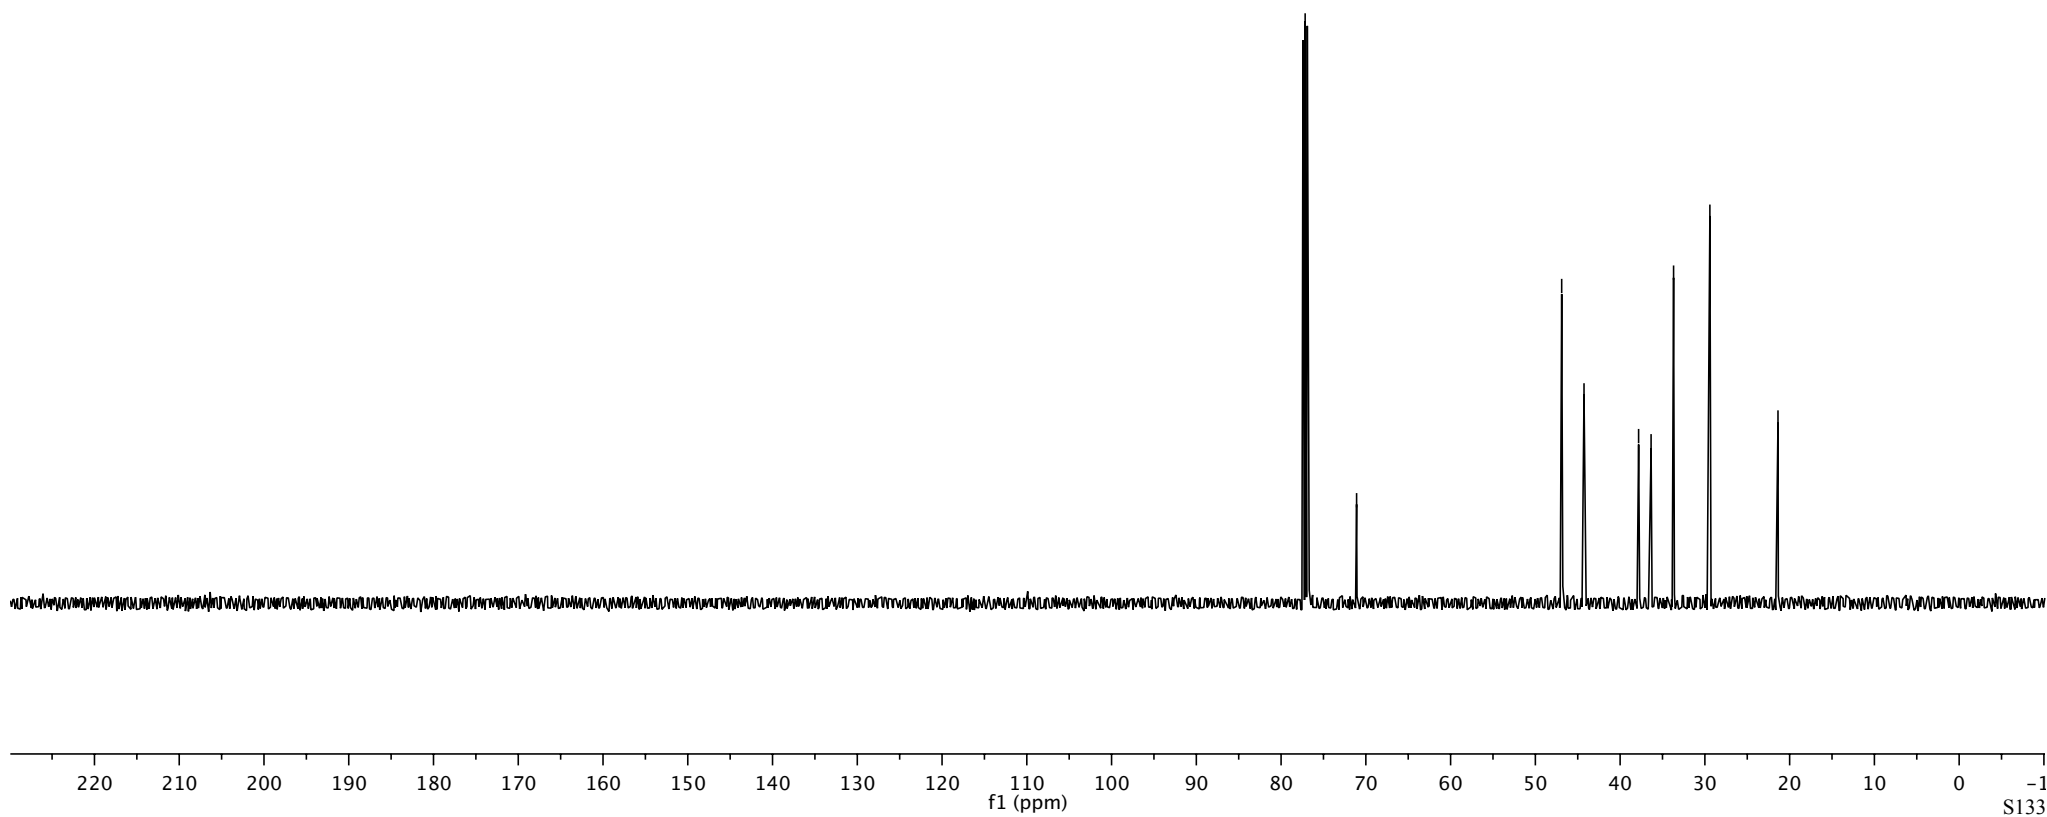

| Parameter              | Value             |
|------------------------|-------------------|
| Origin                 | Varian            |
| Spectrometer           | inova             |
| Solvent                | CDCl <sub>3</sub> |
| Temperature            | 20.0              |
| Pulse Sequence         | s2pul             |
| Experiment             | 1D                |
| Probe                  | QUAD              |
| Number of Scans        | 16                |
| Receiver Gain          | 48                |
| Relaxation Delay       | 2.0000            |
| Pulse Width            | 0.0000            |
| Acquisition Time       | 4.6645            |
| Spectrometer Frequency | 499.69            |
| Spectral Width         | 7024.9            |
| Lowest Frequency       | -1021.9           |
| Nucleus                | <sup>1</sup> H    |
| Acquired Size          | 32768             |
| Spectral Size          | 65536             |

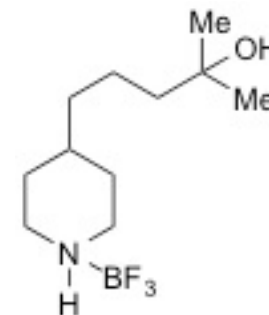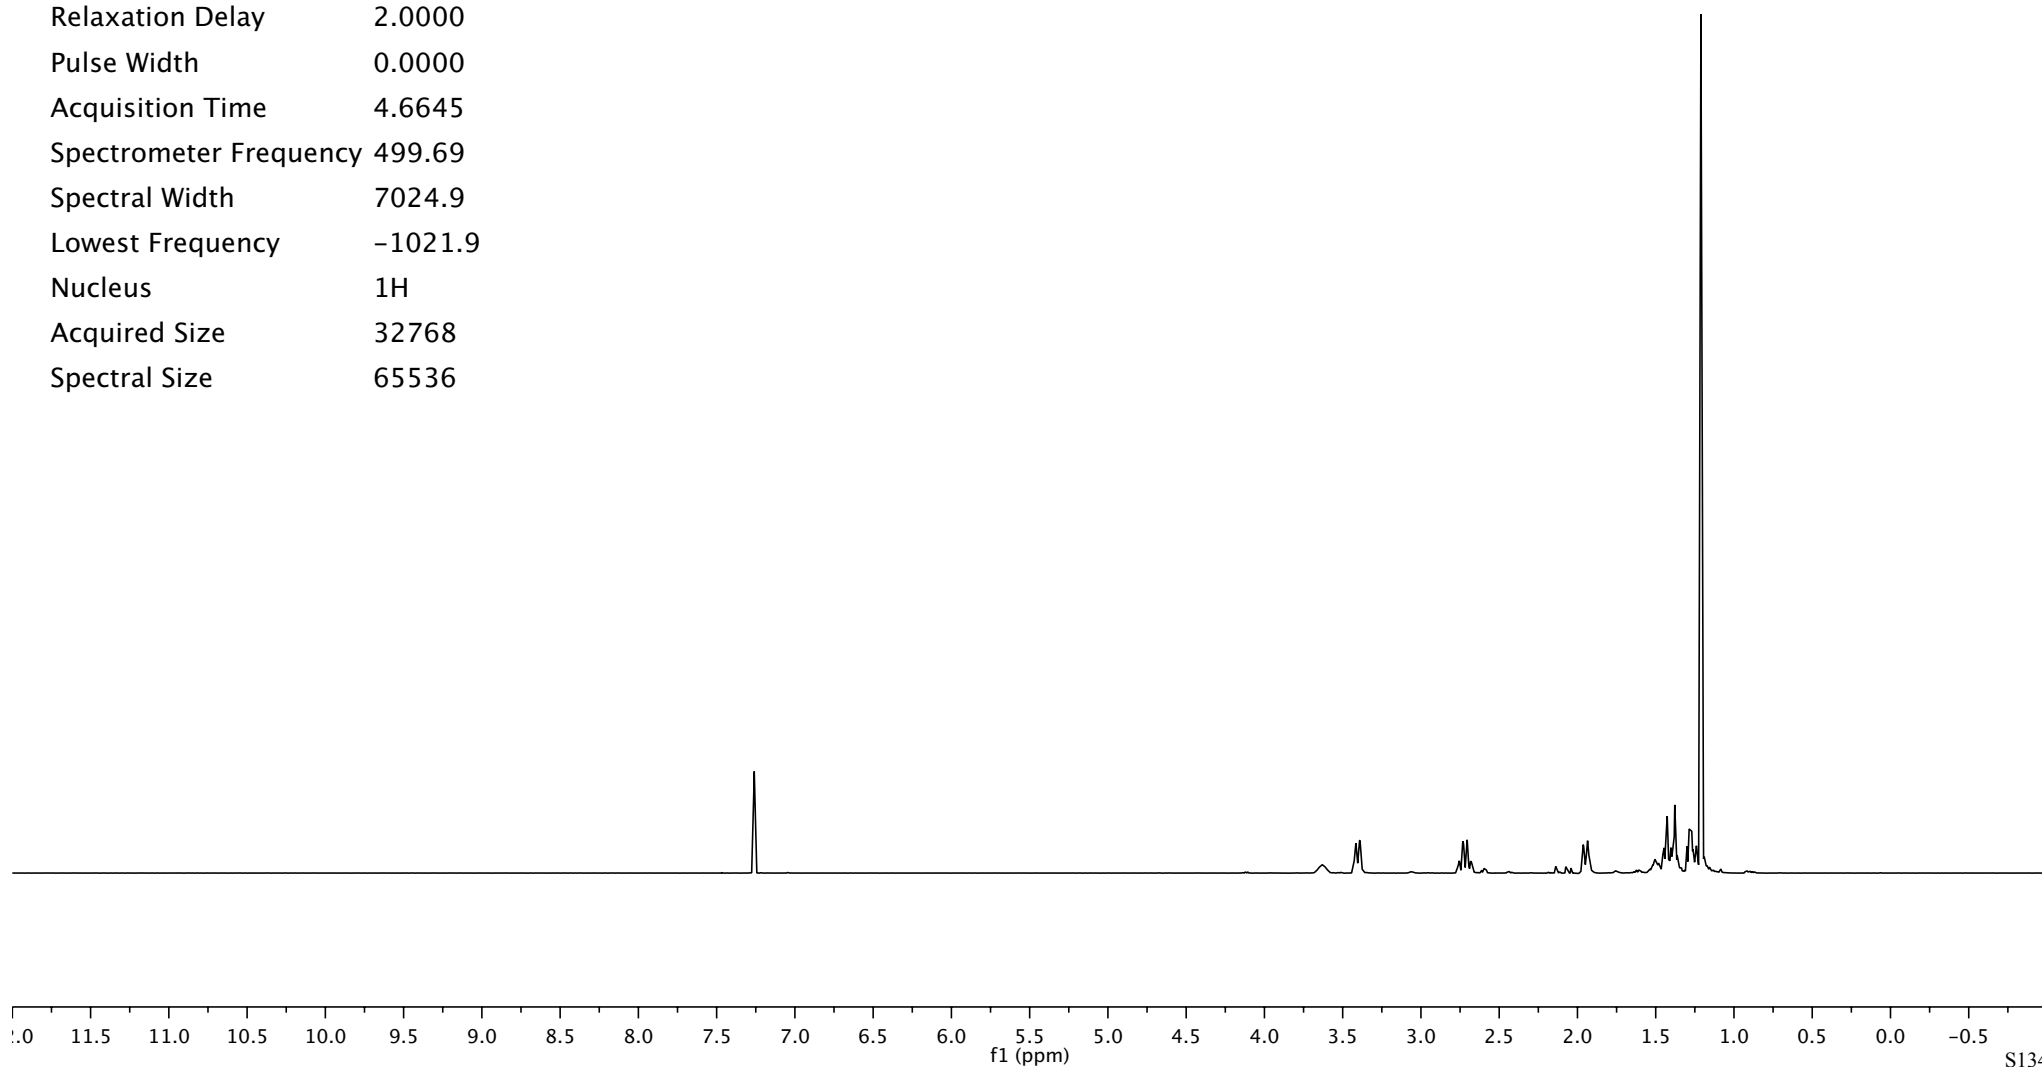

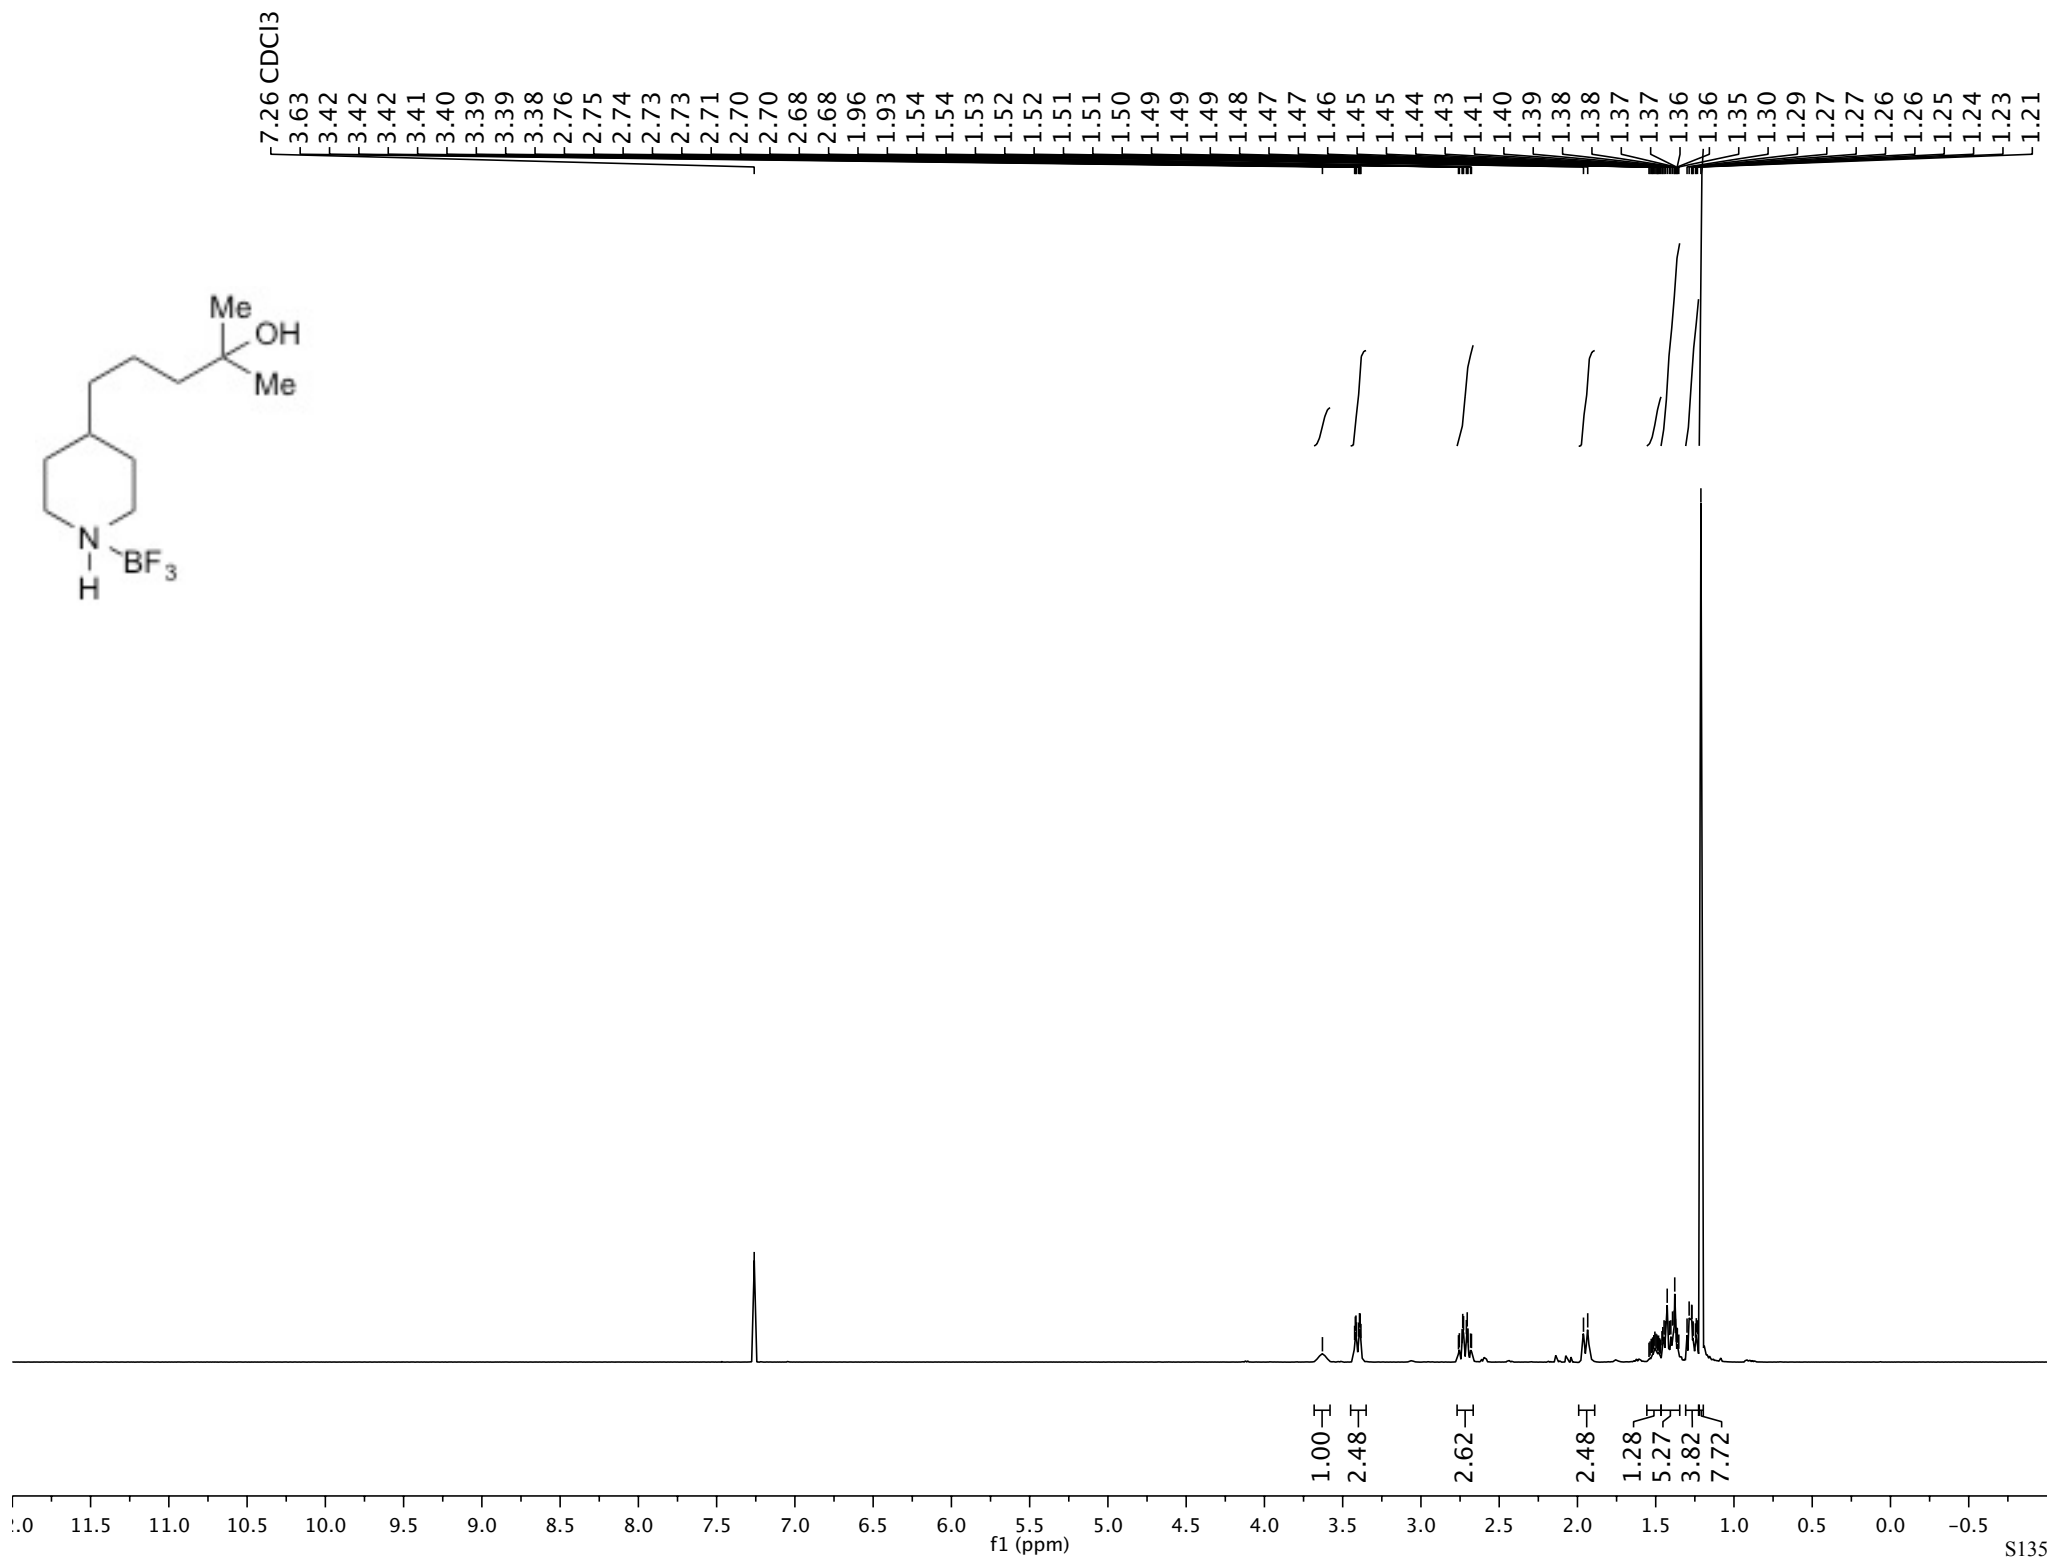



| Parameter              | Value             |
|------------------------|-------------------|
| Origin                 | Varian            |
| Spectrometer           | inova             |
| Solvent                | CDCl <sub>3</sub> |
| Temperature            | 20.0              |
| Pulse Sequence         | s2pul             |
| Experiment             | 1D                |
| Probe                  | QUAD              |
| Number of Scans        | 643               |
| Receiver Gain          | 60                |
| Relaxation Delay       | 2.0000            |
| Pulse Width            | 0.0000            |
| Acquisition Time       | 1.0863            |
| Spectrometer Frequency | 125.66            |
| Spectral Width         | 30165.9           |
| Lowest Frequency       | -1273.0           |
| Nucleus                | <sup>13</sup> C   |
| Acquired Size          | 32768             |
| Spectral Size          | 65536             |

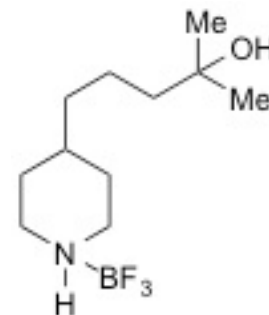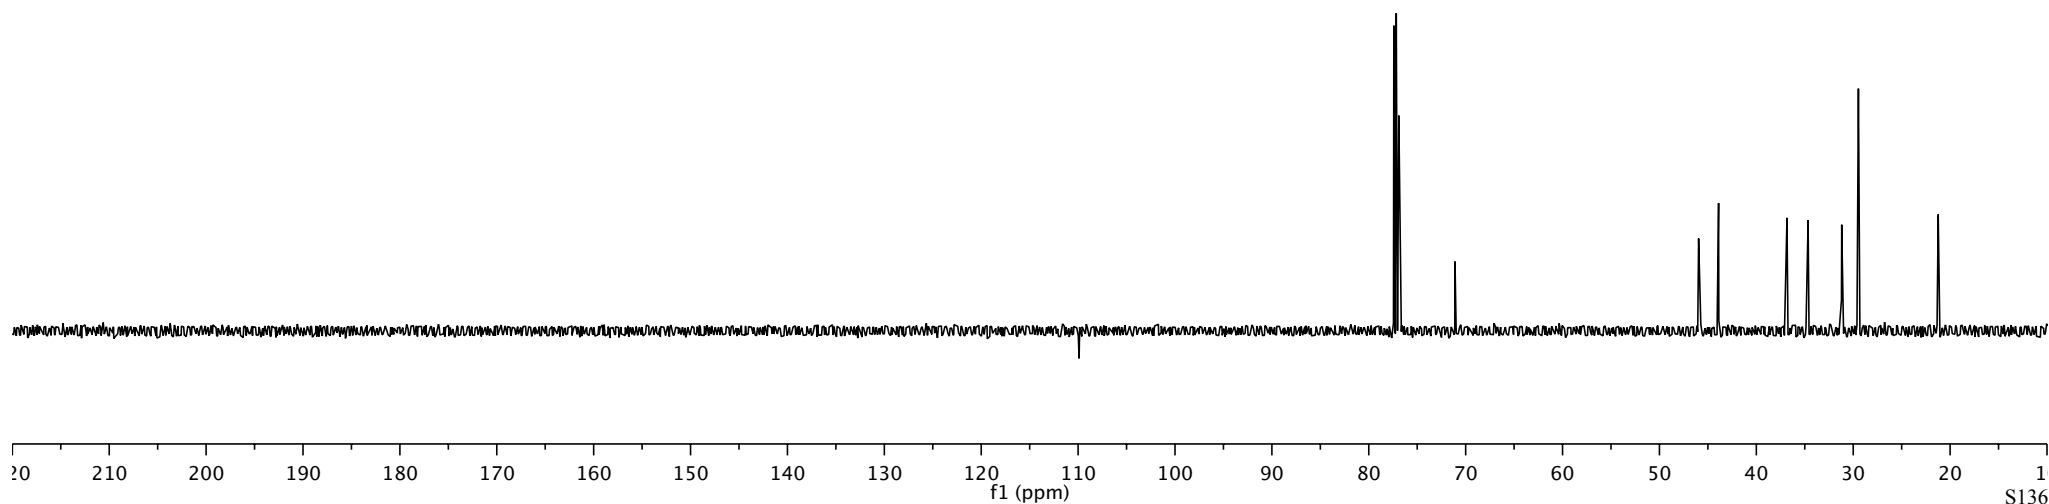

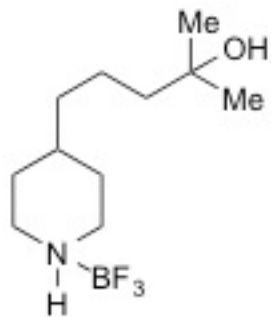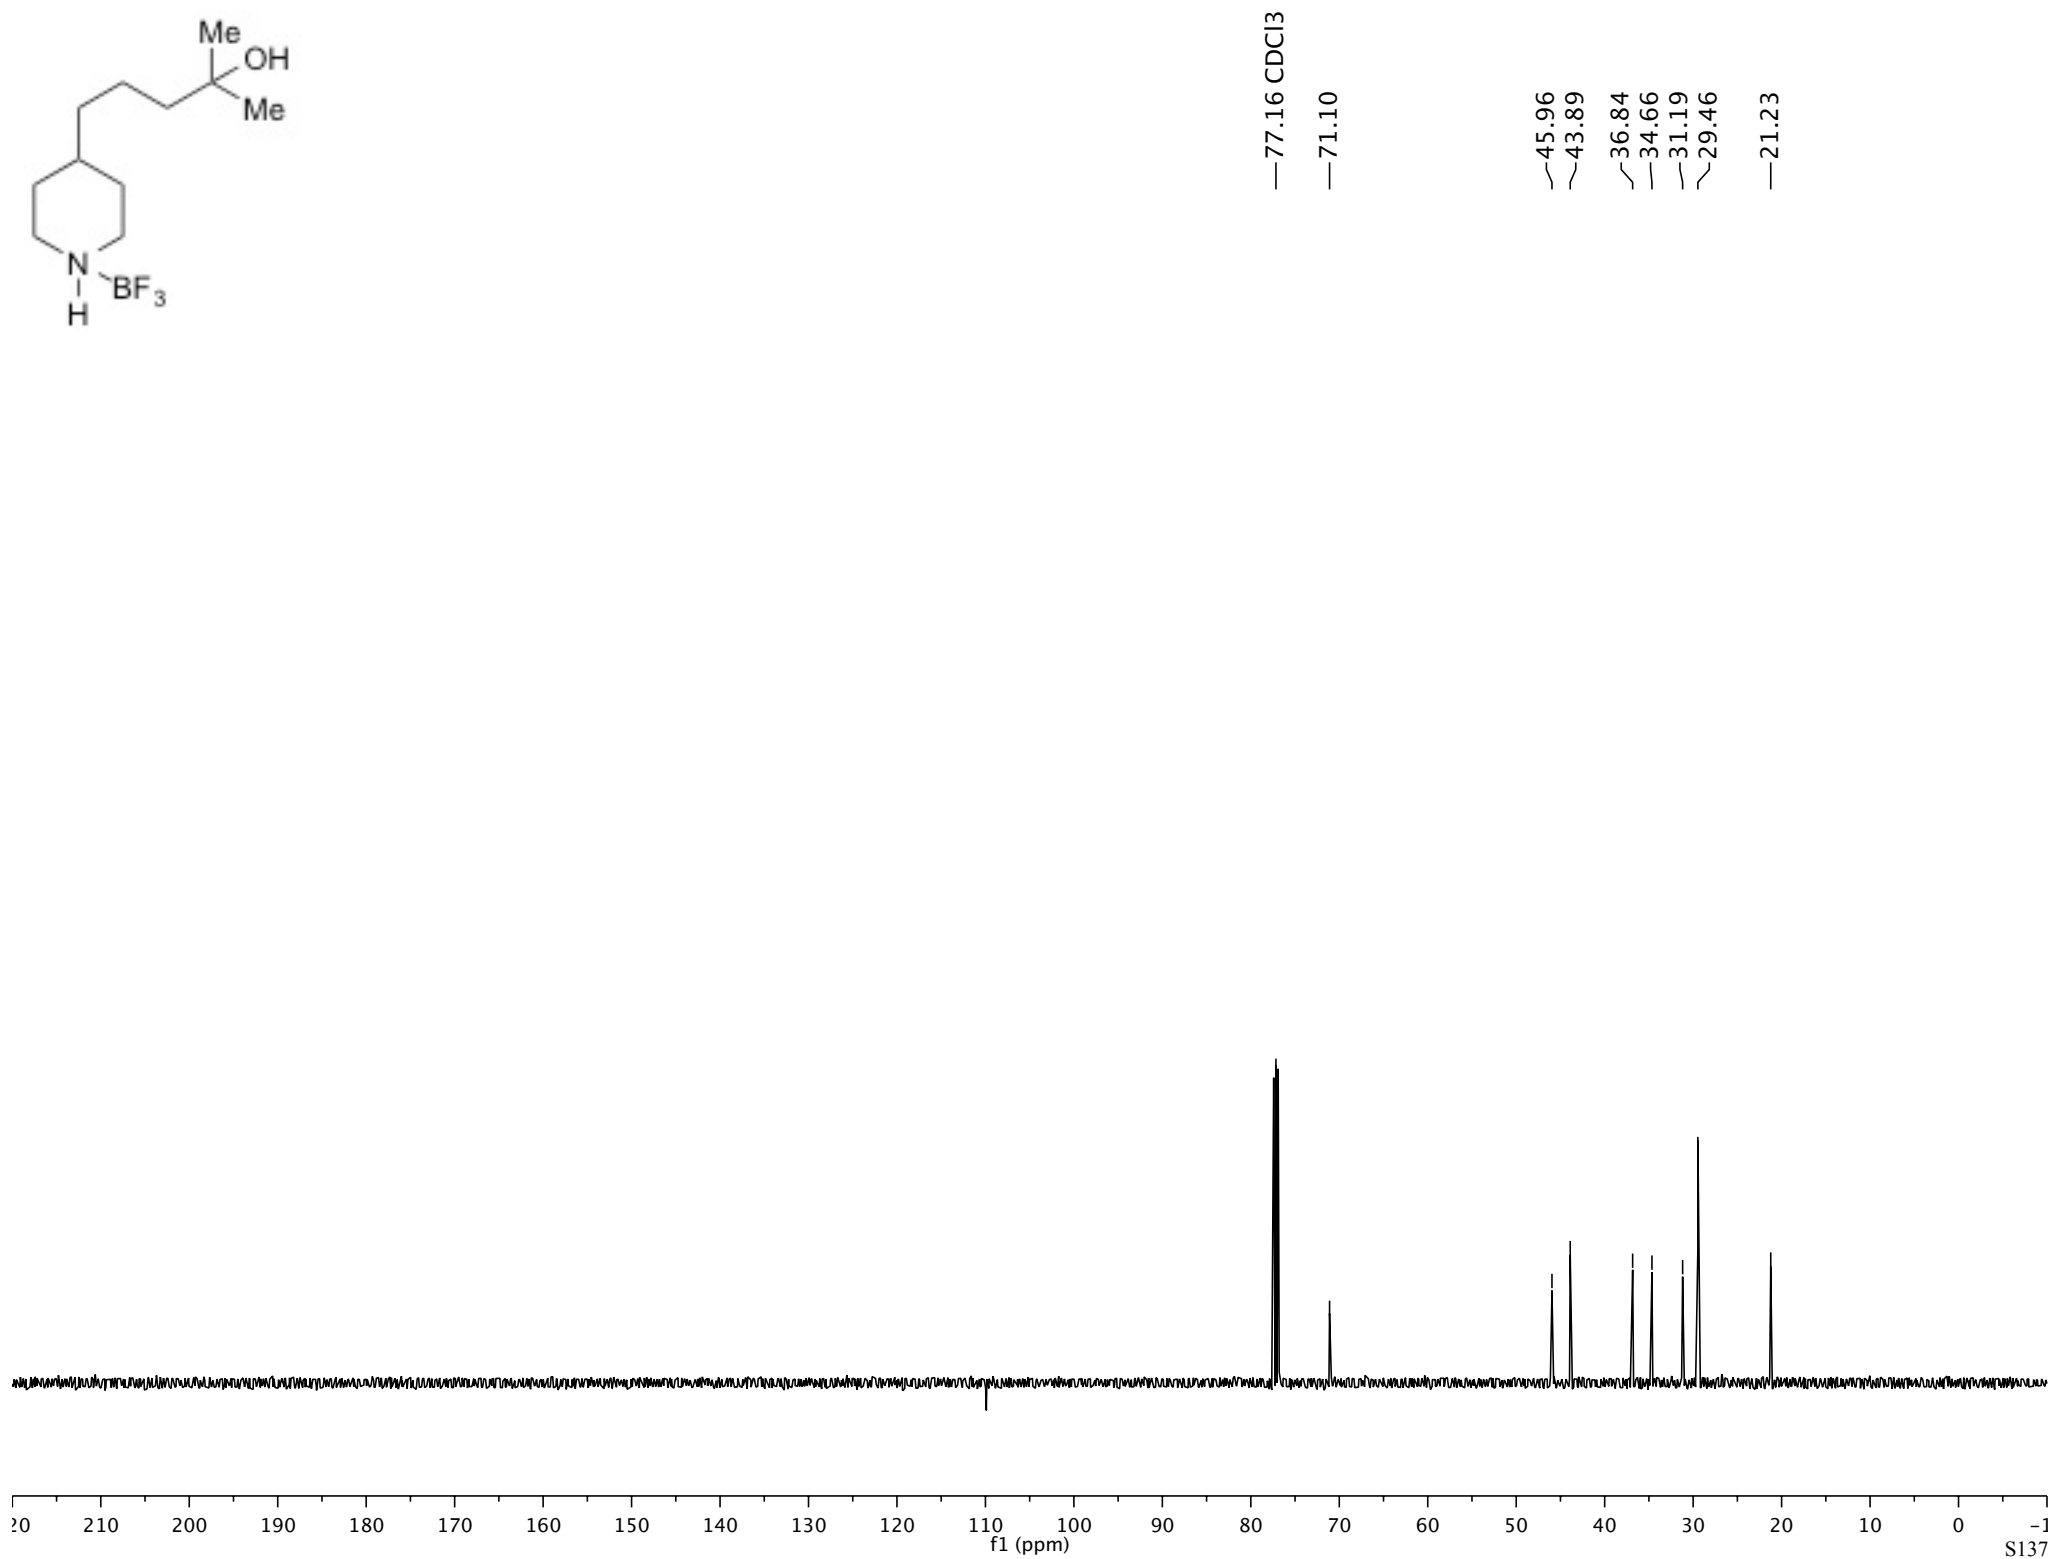

| Parameter              | Value           |
|------------------------|-----------------|
| Origin                 | Varian          |
| Spectrometer           | inova           |
| Solvent                | CDCl3           |
| Temperature            | 20.0            |
| Pulse Sequence         | s2pul           |
| Experiment             | 1D              |
| Probe                  | QUAD            |
| Number of Scans        | 132             |
| Receiver Gain          | 60              |
| Relaxation Delay       | 0.0000          |
| Pulse Width            | 0.0000          |
| Acquisition Time       | 0.3277          |
| Spectrometer Frequency | 470.15          |
| Spectral Width         | 100000.0        |
| Lowest Frequency       | -79501.3        |
| Nucleus                | <sup>19</sup> F |
| Acquired Size          | 32768           |
| Spectral Size          | 65536           |

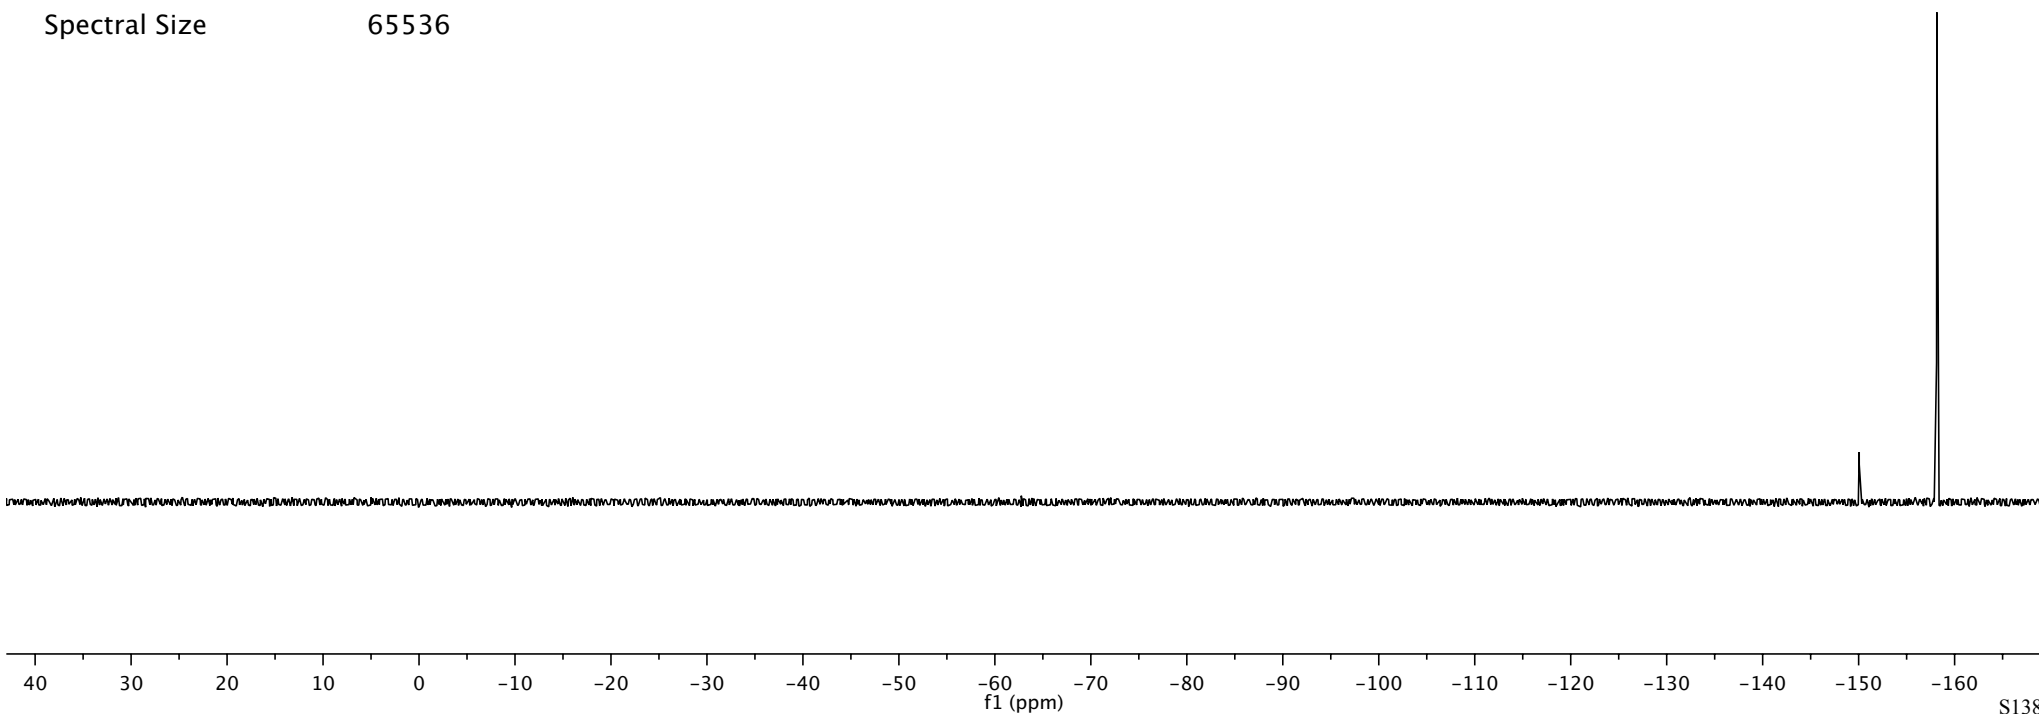



158.15  
158.18  
158.22  
158.25

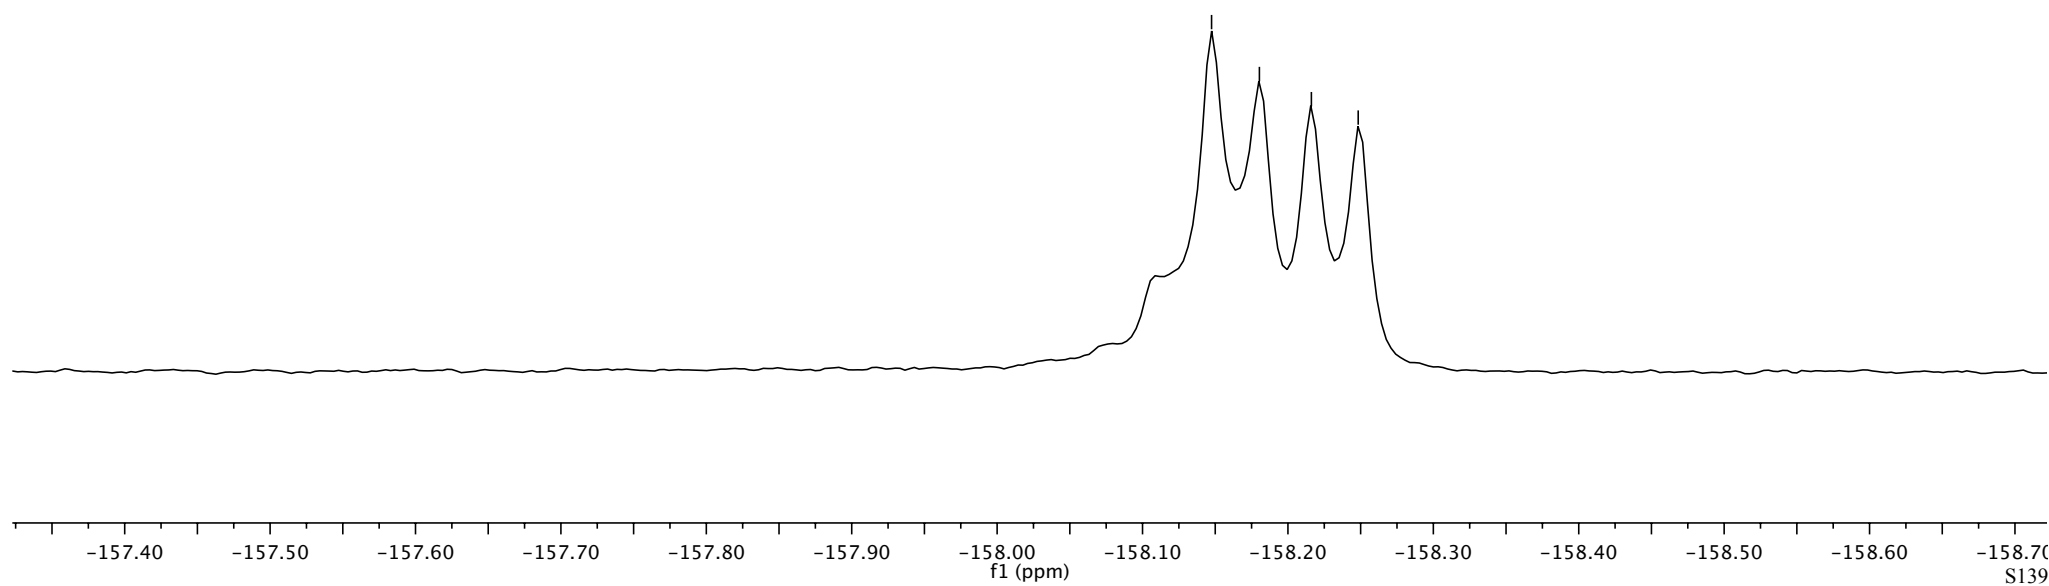

|    | Parameter              | Value          |
|----|------------------------|----------------|
| 1  | Origin                 | Varian         |
| 2  | Spectrometer           | inova          |
| 3  | Solvent                | CDCl3          |
| 4  | Temperature            | 20.0           |
| 5  | Pulse Sequence         | s2pul          |
| 6  | Experiment             | 1D             |
| 7  | Probe                  | QUAD           |
| 8  | Number of Scans        | 8              |
| 9  | Receiver Gain          | 36             |
| 10 | Relaxation Delay       | 0.0000         |
| 11 | Pulse Width            | 0.0000         |
| 12 | Acquisition Time       | 4.6645         |
| 13 | Spectrometer Frequency | 499.69         |
| 14 | Spectral Width         | 7024.9         |
| 15 | Lowest Frequency       | -1010.9        |
| 16 | Nucleus                | <sup>1</sup> H |
| 17 | Acquired Size          | 32768          |
| 18 | Spectral Size          | 65536          |

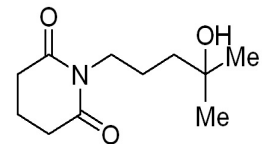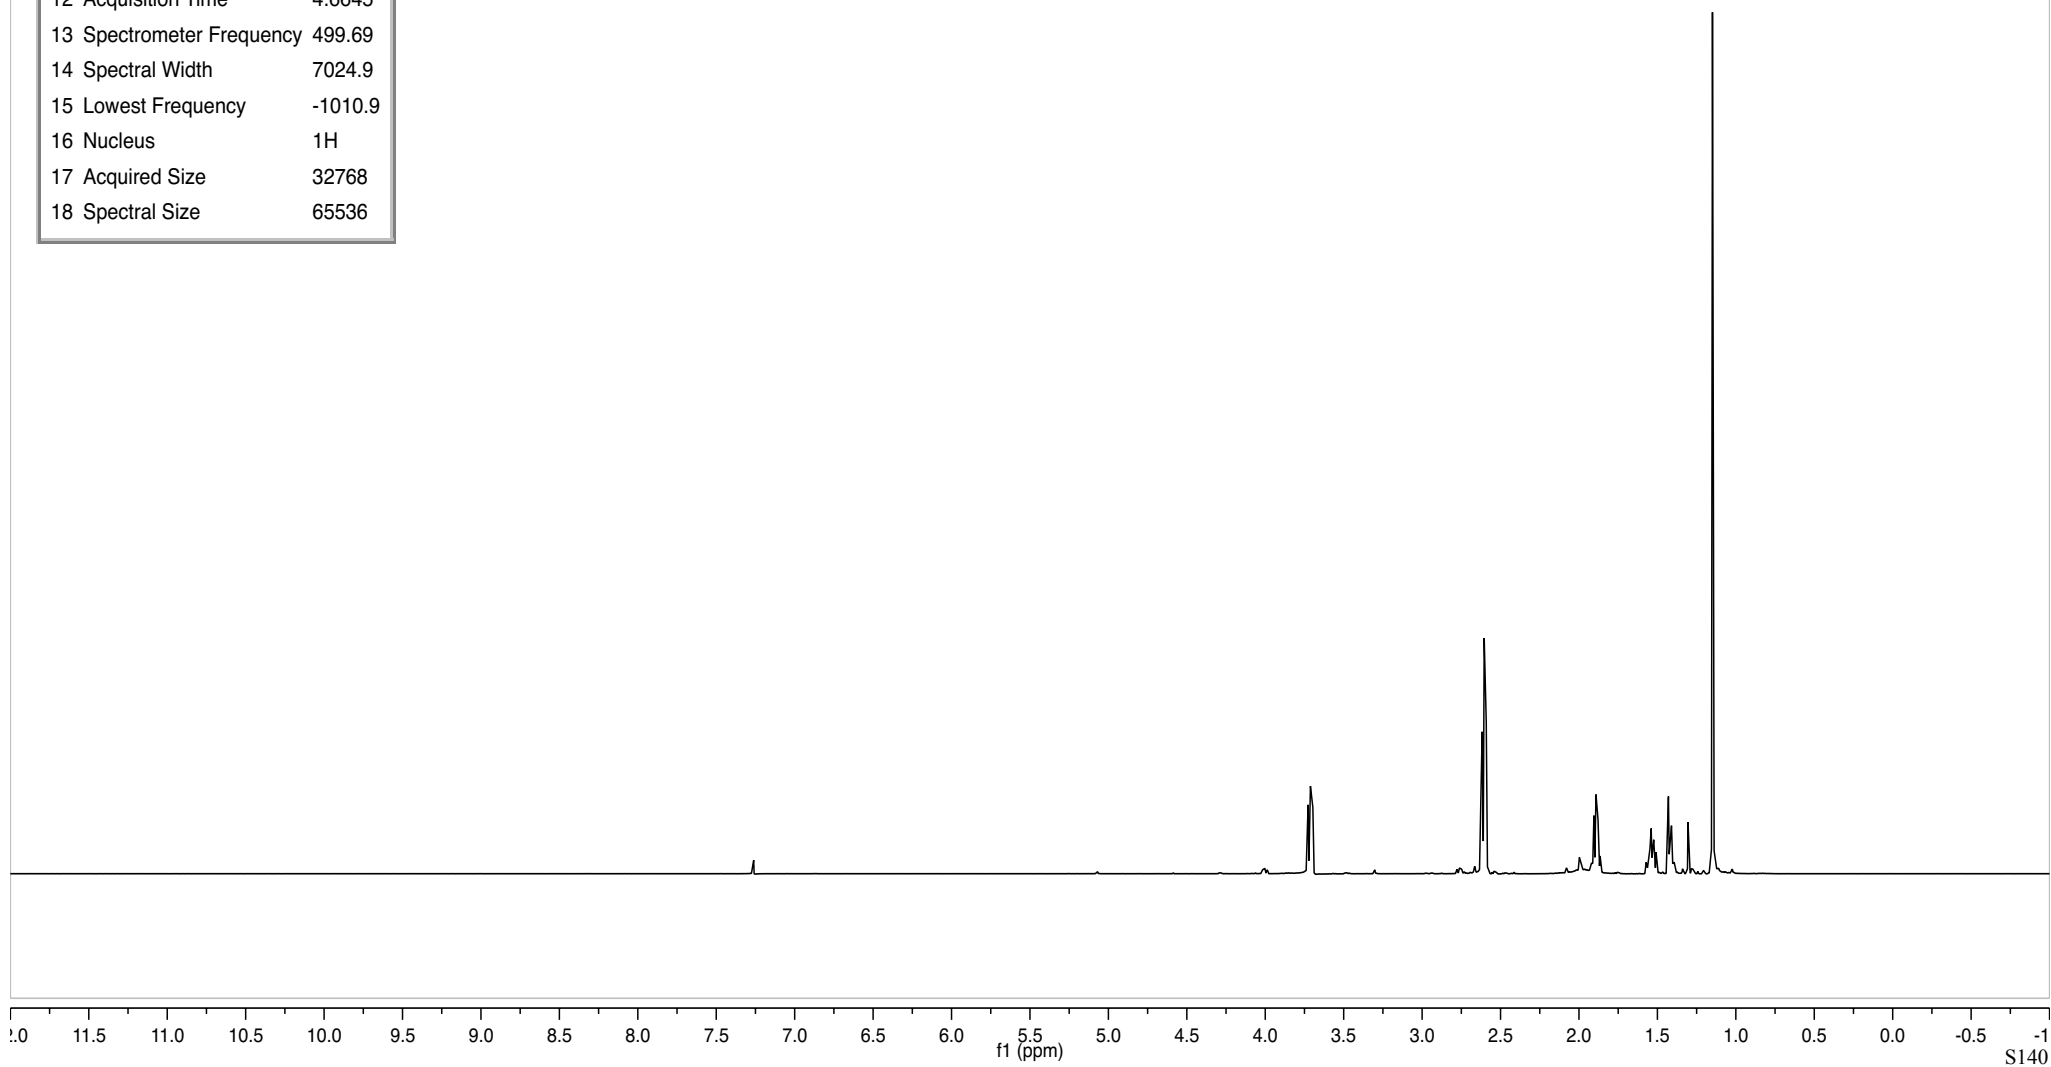

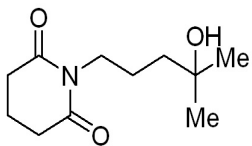

— 7.26 CDCl<sub>3</sub>

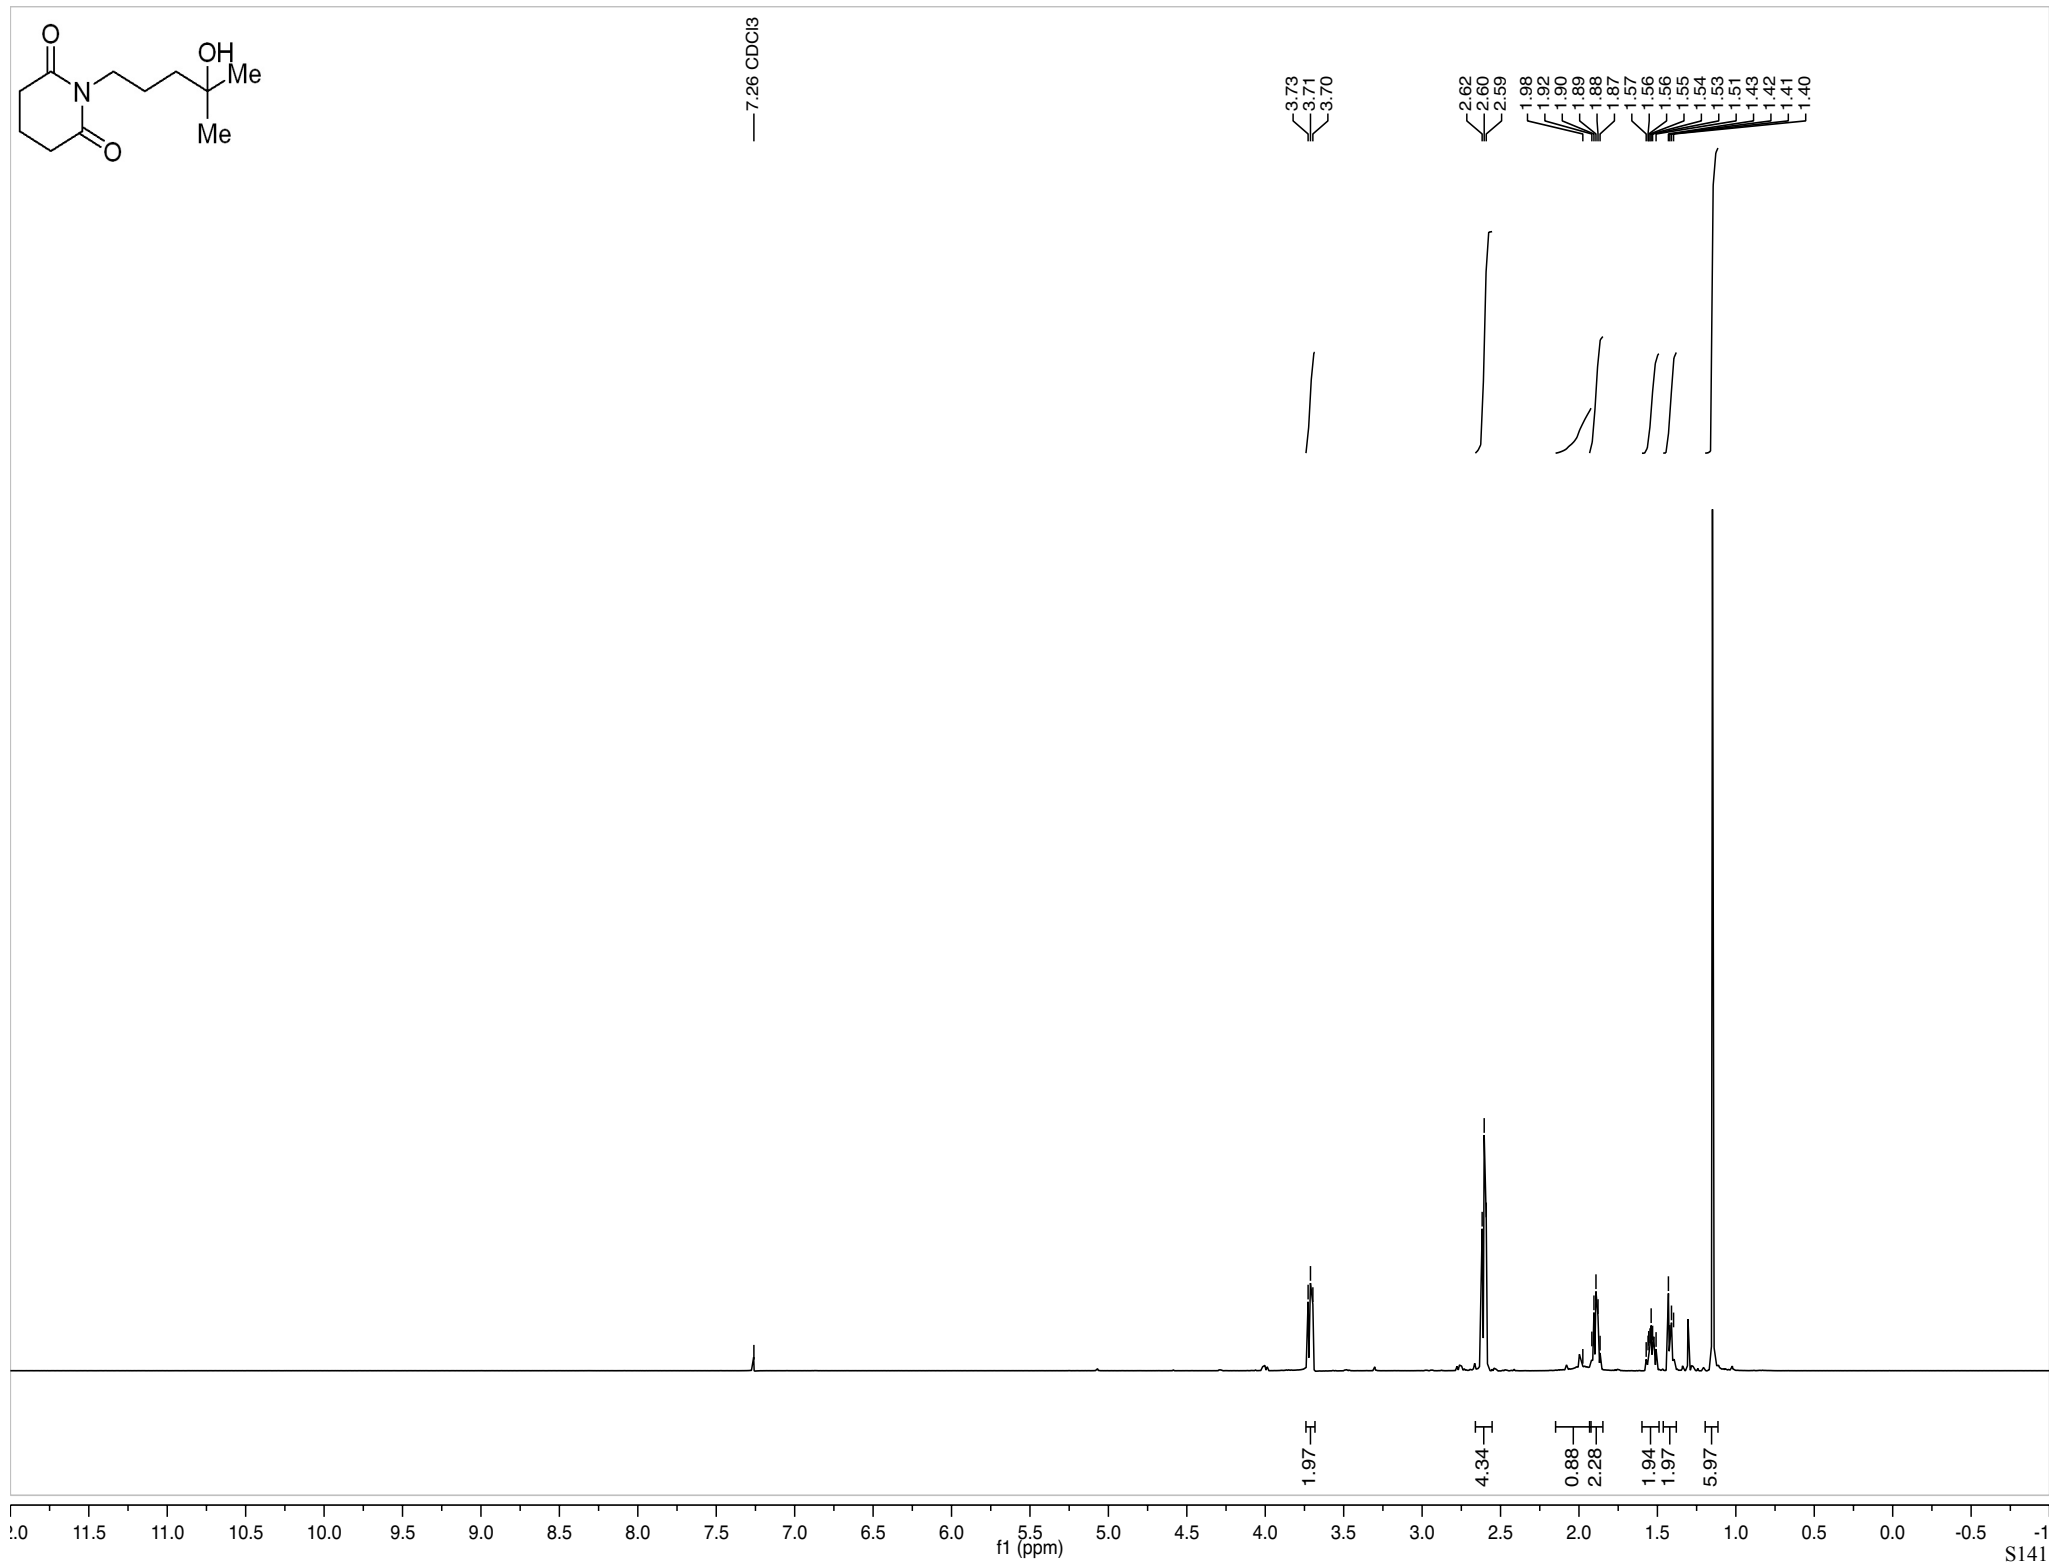

|    | Parameter              | Value           |
|----|------------------------|-----------------|
| 1  | Origin                 | Varian          |
| 2  | Spectrometer           | inova           |
| 3  | Solvent                | CDCl3           |
| 4  | Temperature            | 20.0            |
| 5  | Pulse Sequence         | s2pul           |
| 6  | Experiment             | 1D              |
| 7  | Probe                  | QUAD            |
| 8  | Number of Scans        | 48              |
| 9  | Receiver Gain          | 60              |
| 10 | Relaxation Delay       | 1.0000          |
| 11 | Pulse Width            | 0.0000          |
| 12 | Acquisition Time       | 1.0863          |
| 13 | Spectrometer Frequency | 125.66          |
| 14 | Spectral Width         | 30165.9         |
| 15 | Lowest Frequency       | -1279.2         |
| 16 | Nucleus                | <sup>13</sup> C |
| 17 | Acquired Size          | 32768           |
| 18 | Spectral Size          | 65536           |

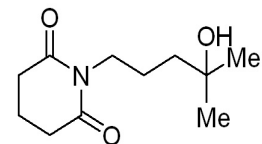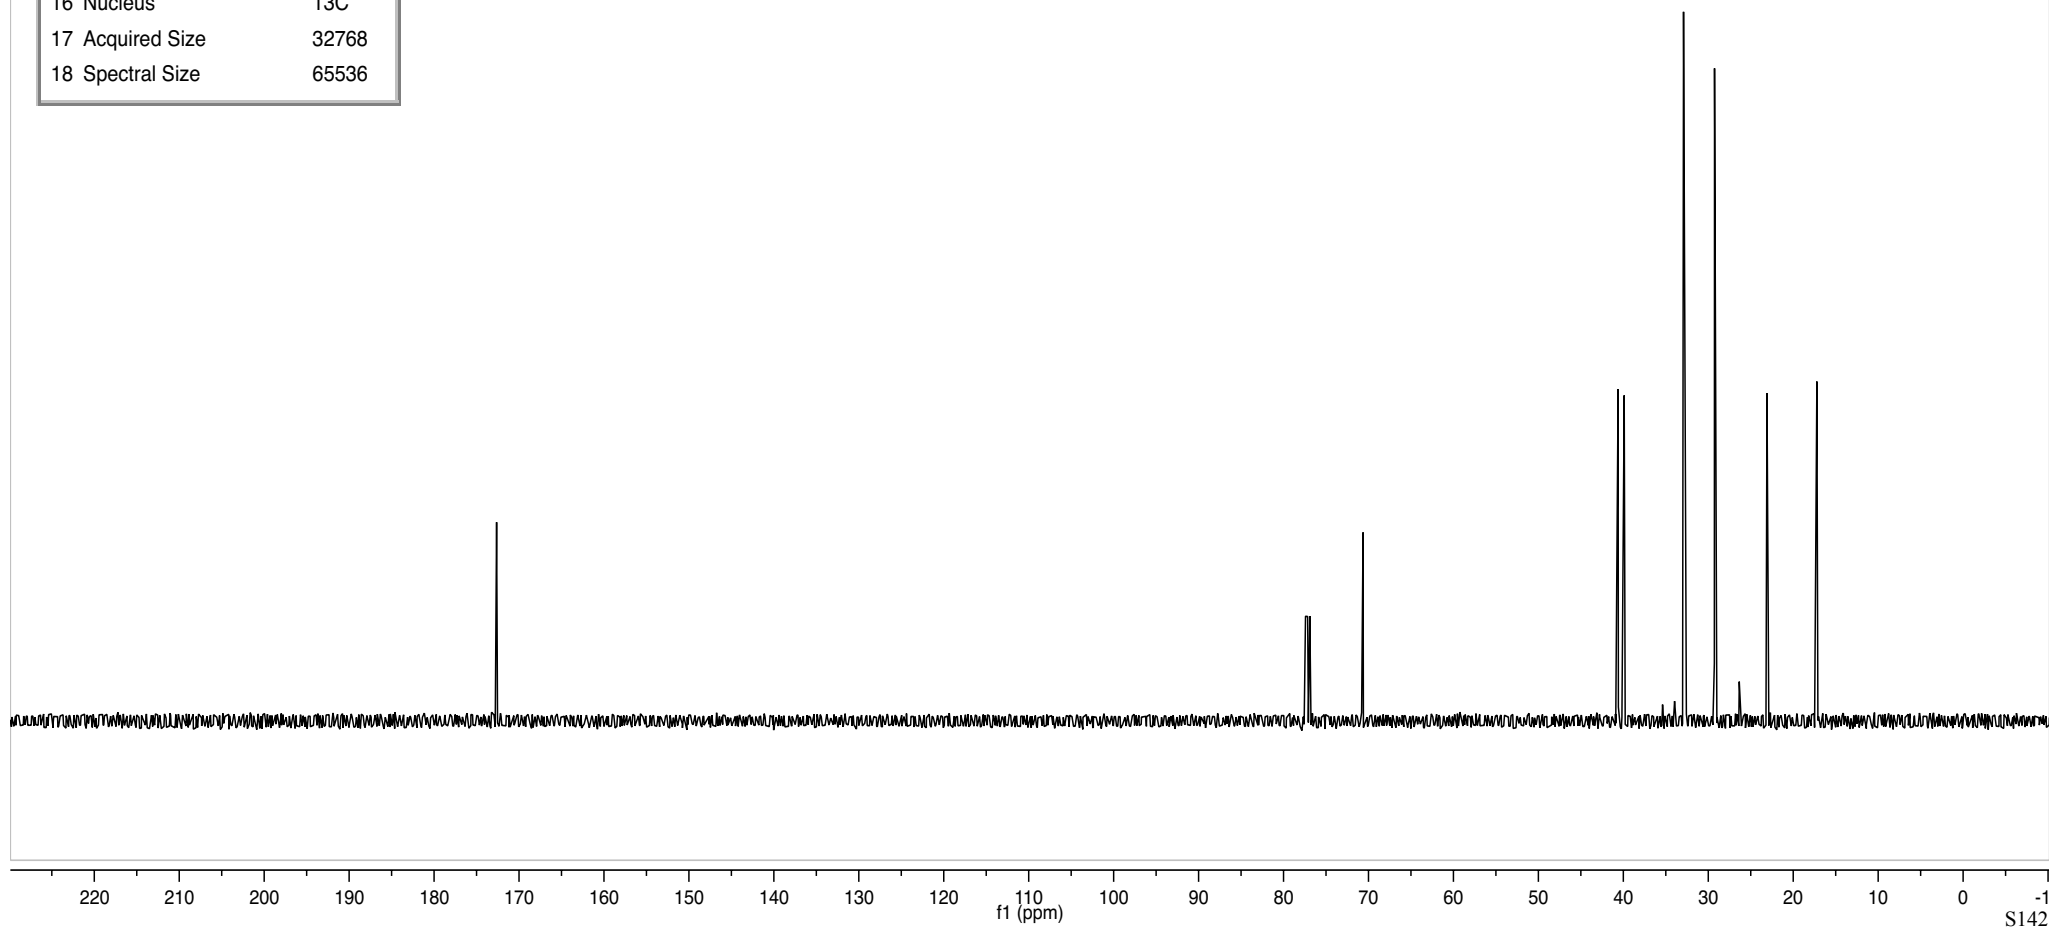

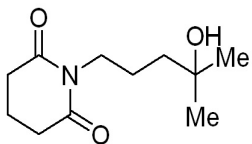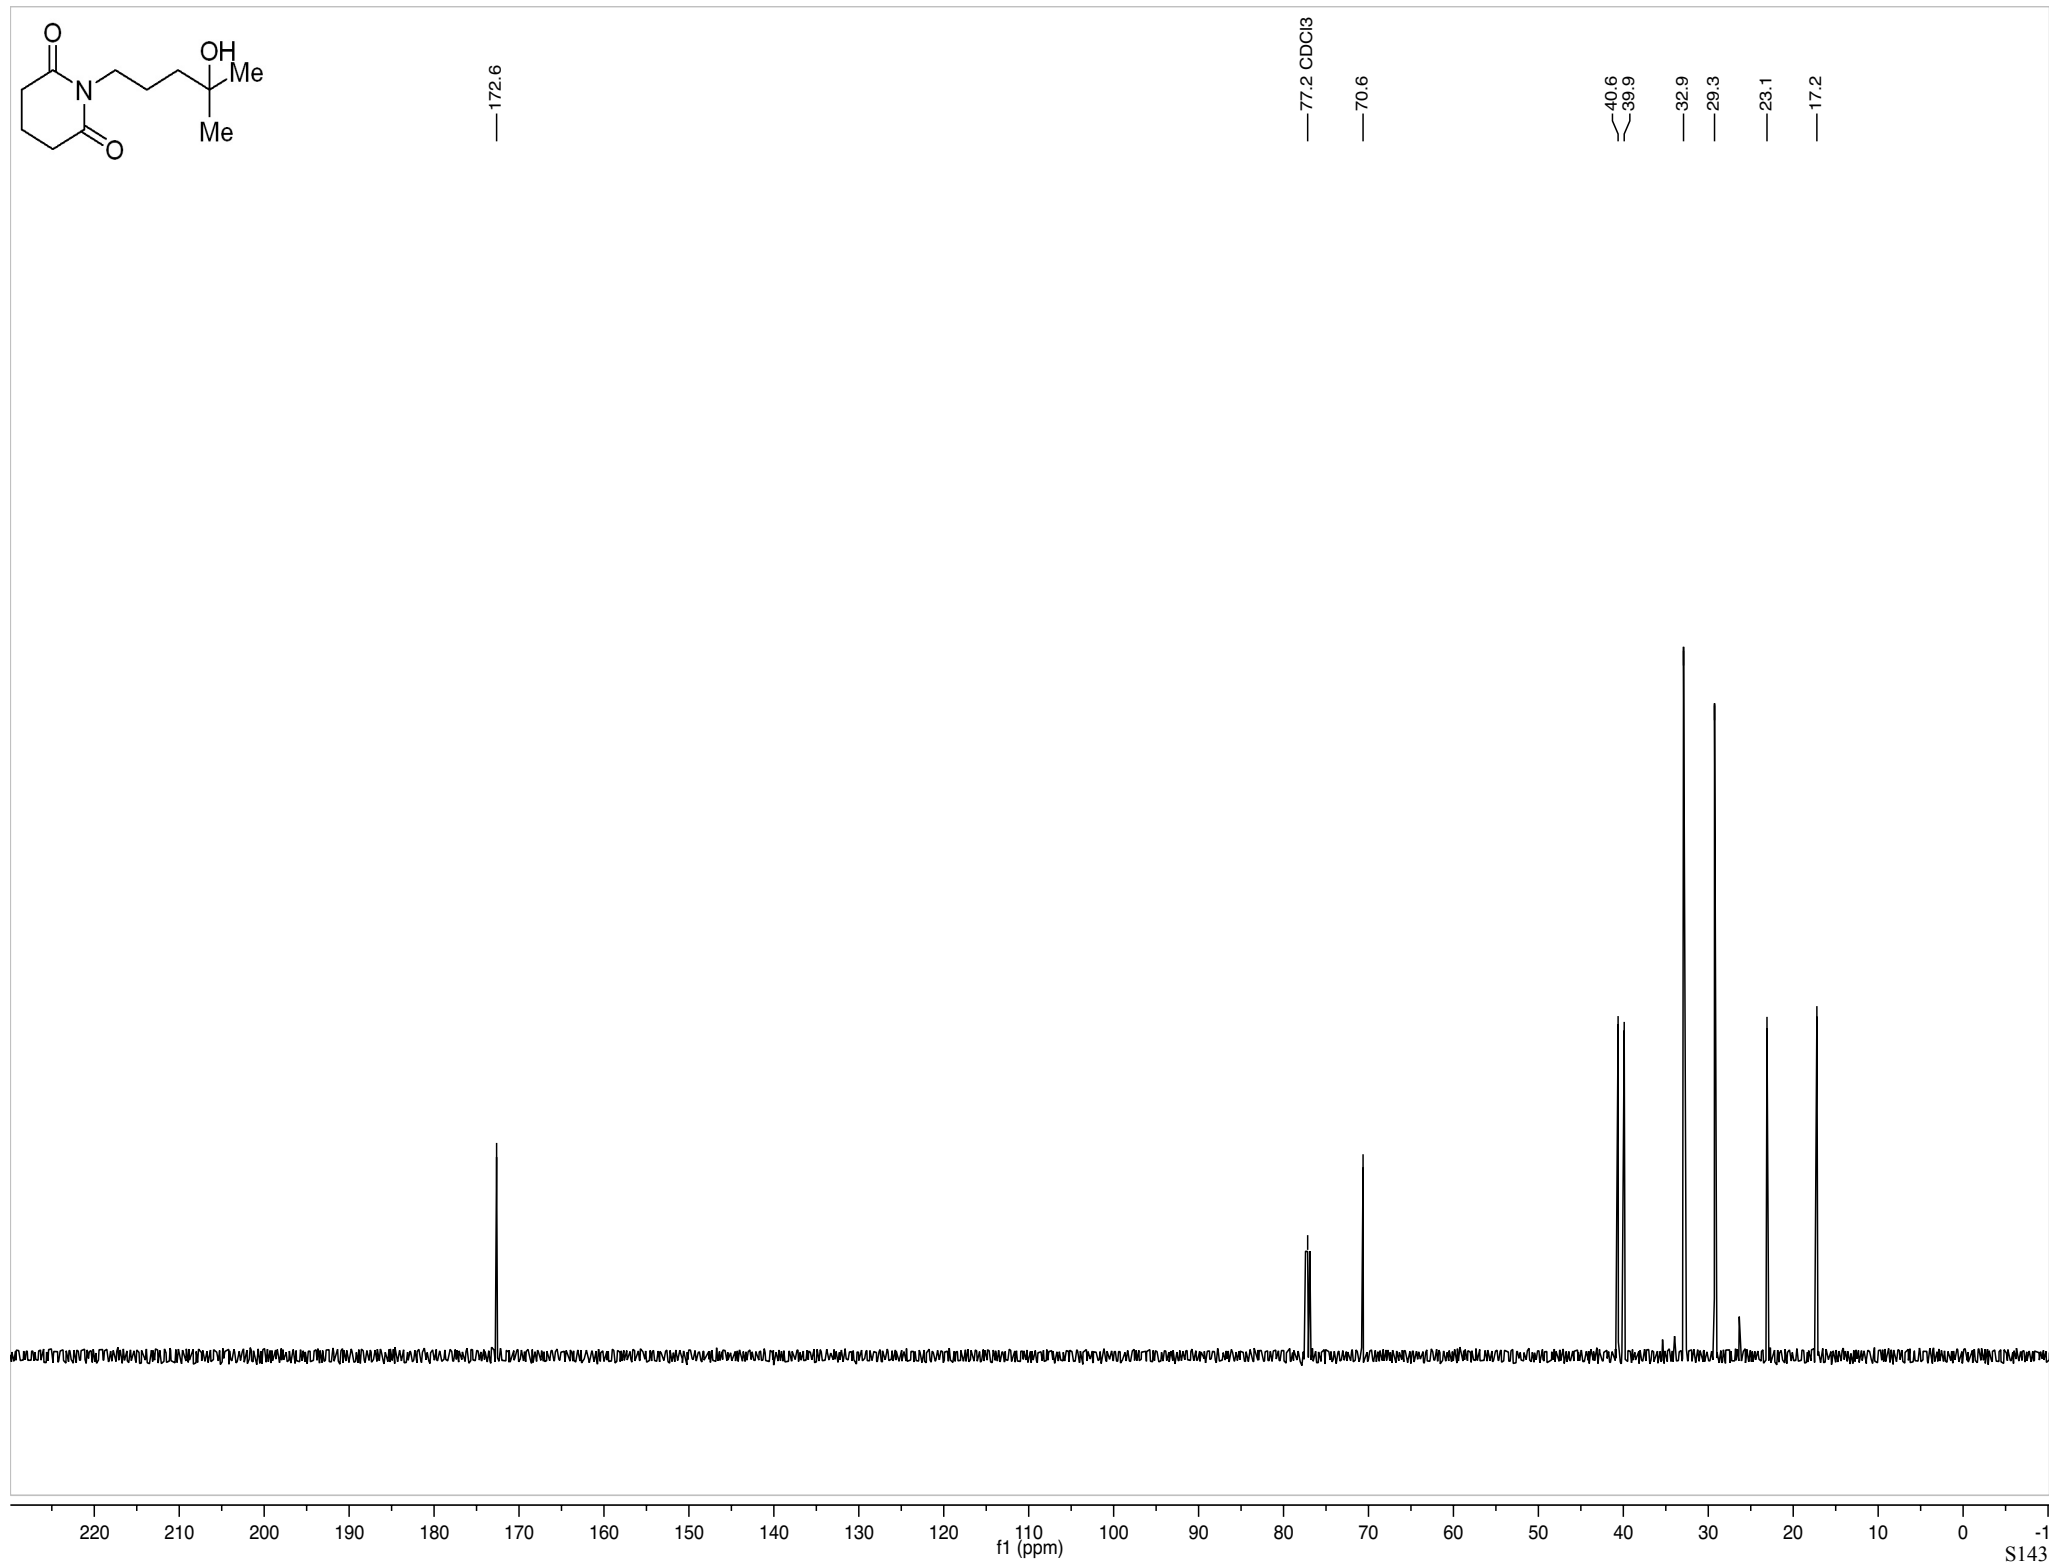



| Parameter              | Value   |
|------------------------|---------|
| Origin                 | Varian  |
| Spectrometer           | inova   |
| Solvent                | CDCl3   |
| Temperature            | 20.0    |
| Pulse Sequence         | s2pul   |
| Experiment             | 1D      |
| Probe                  | hcn     |
| Receiver Gain          | 56      |
| Relaxation Delay       | 10.0000 |
| Pulse Width            | 0.0000  |
| Acquisition Time       | 4.0960  |
| Spectrometer Frequency | 500.07  |
| Spectral Width         | 8000.0  |
| Lowest Frequency       | -1521.1 |
| Nucleus                | 1H      |
| Acquired Size          | 32768   |
| Spectral Size          | 65536   |

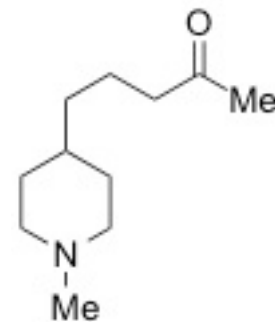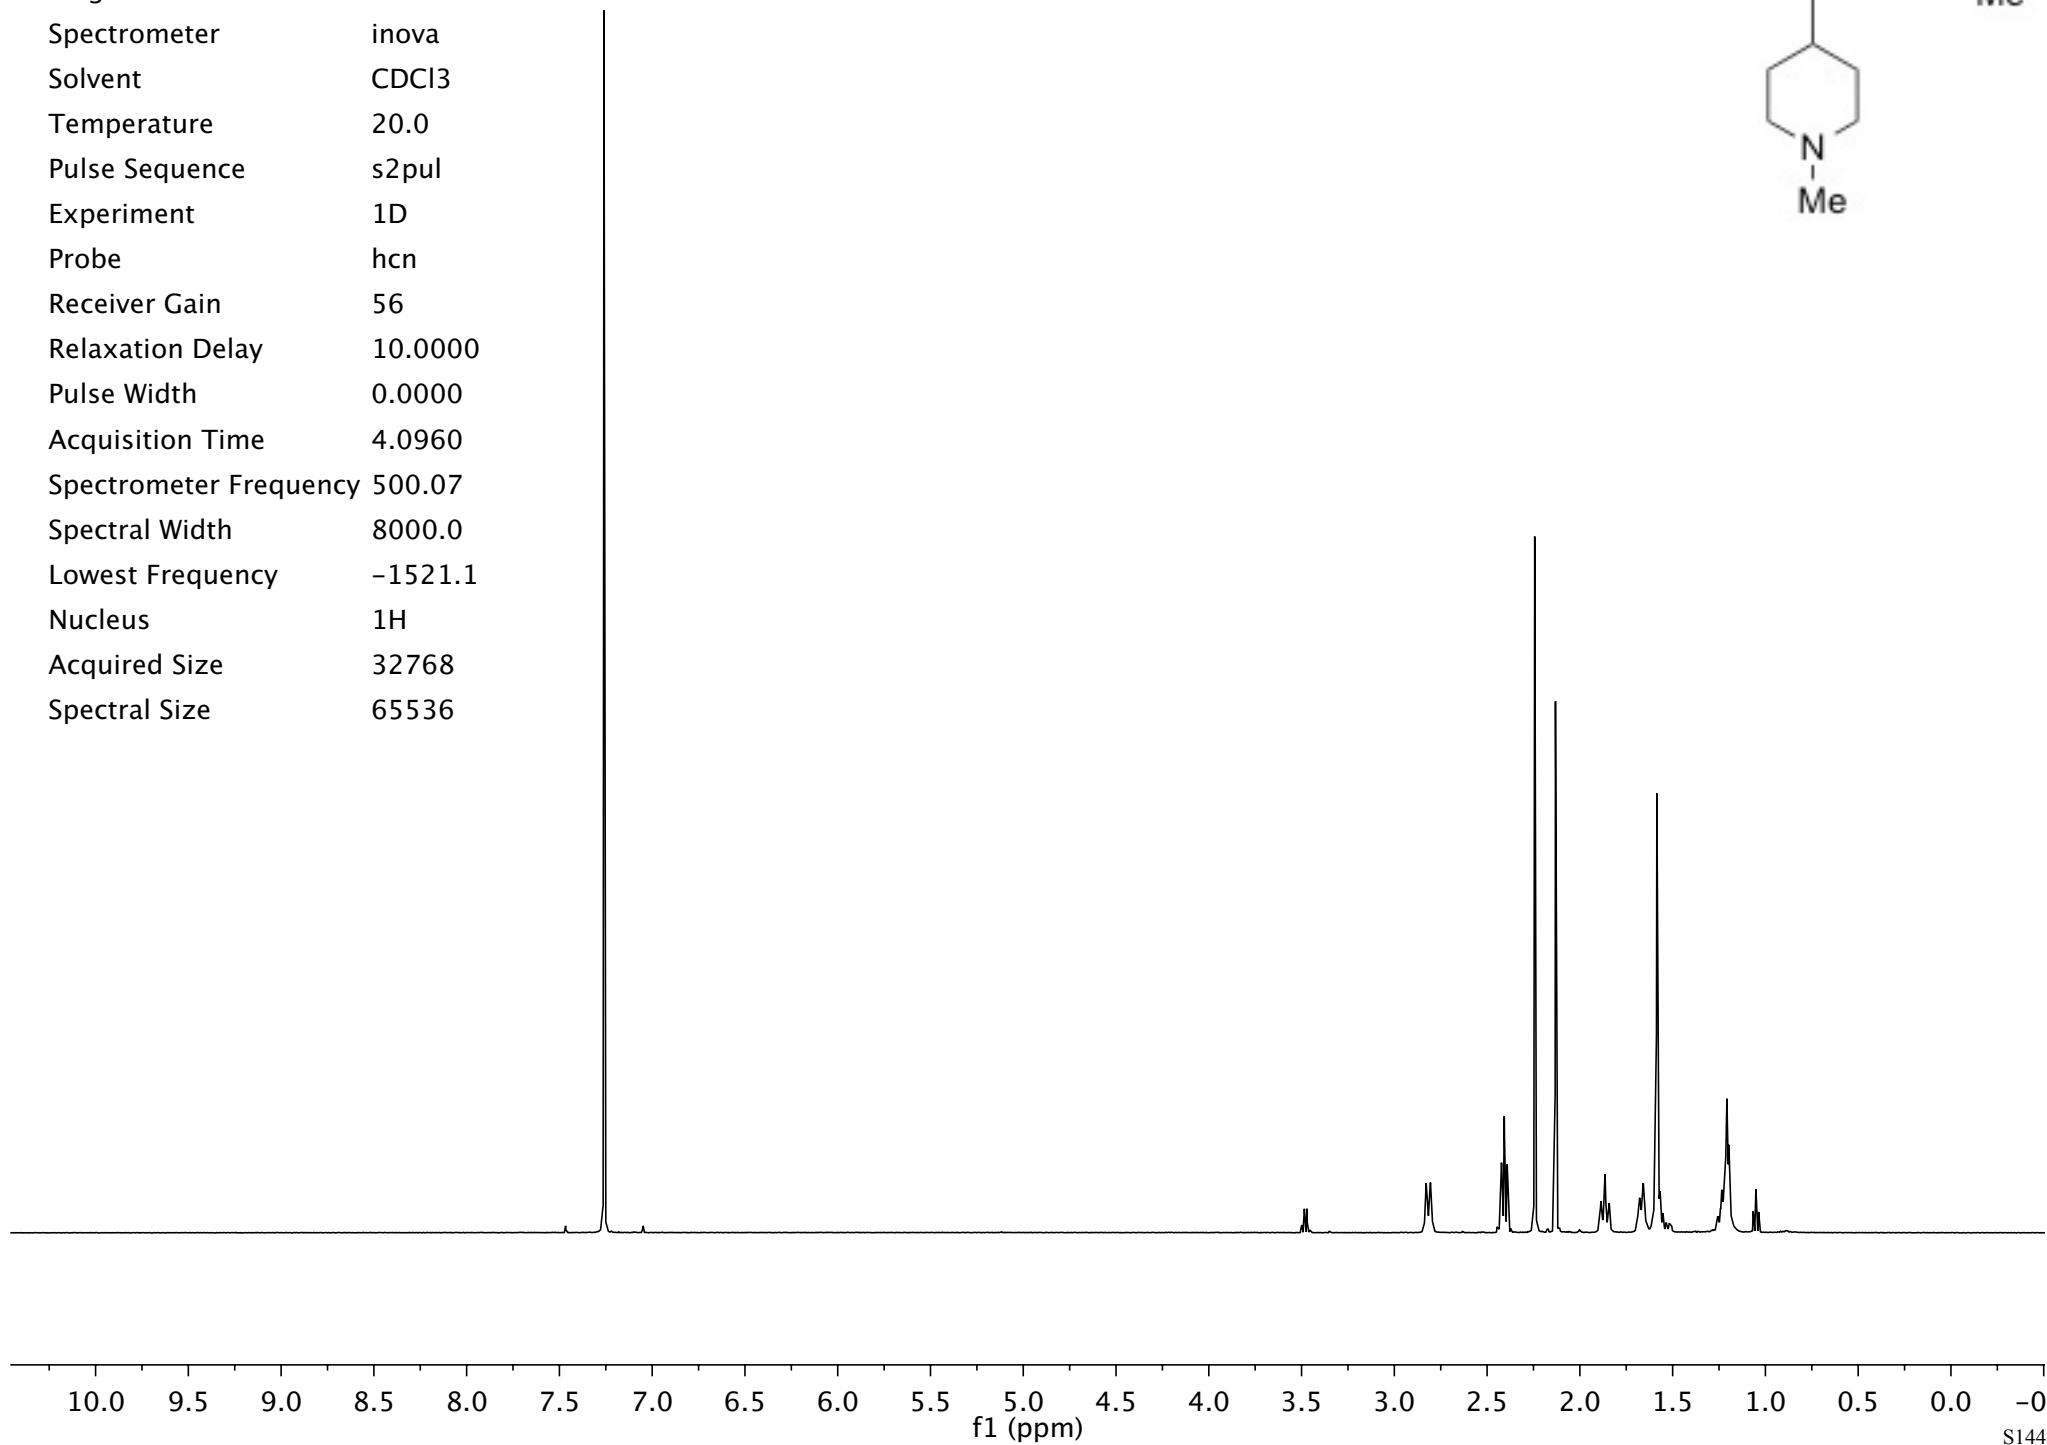

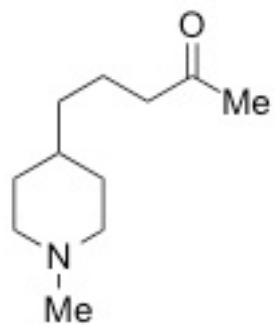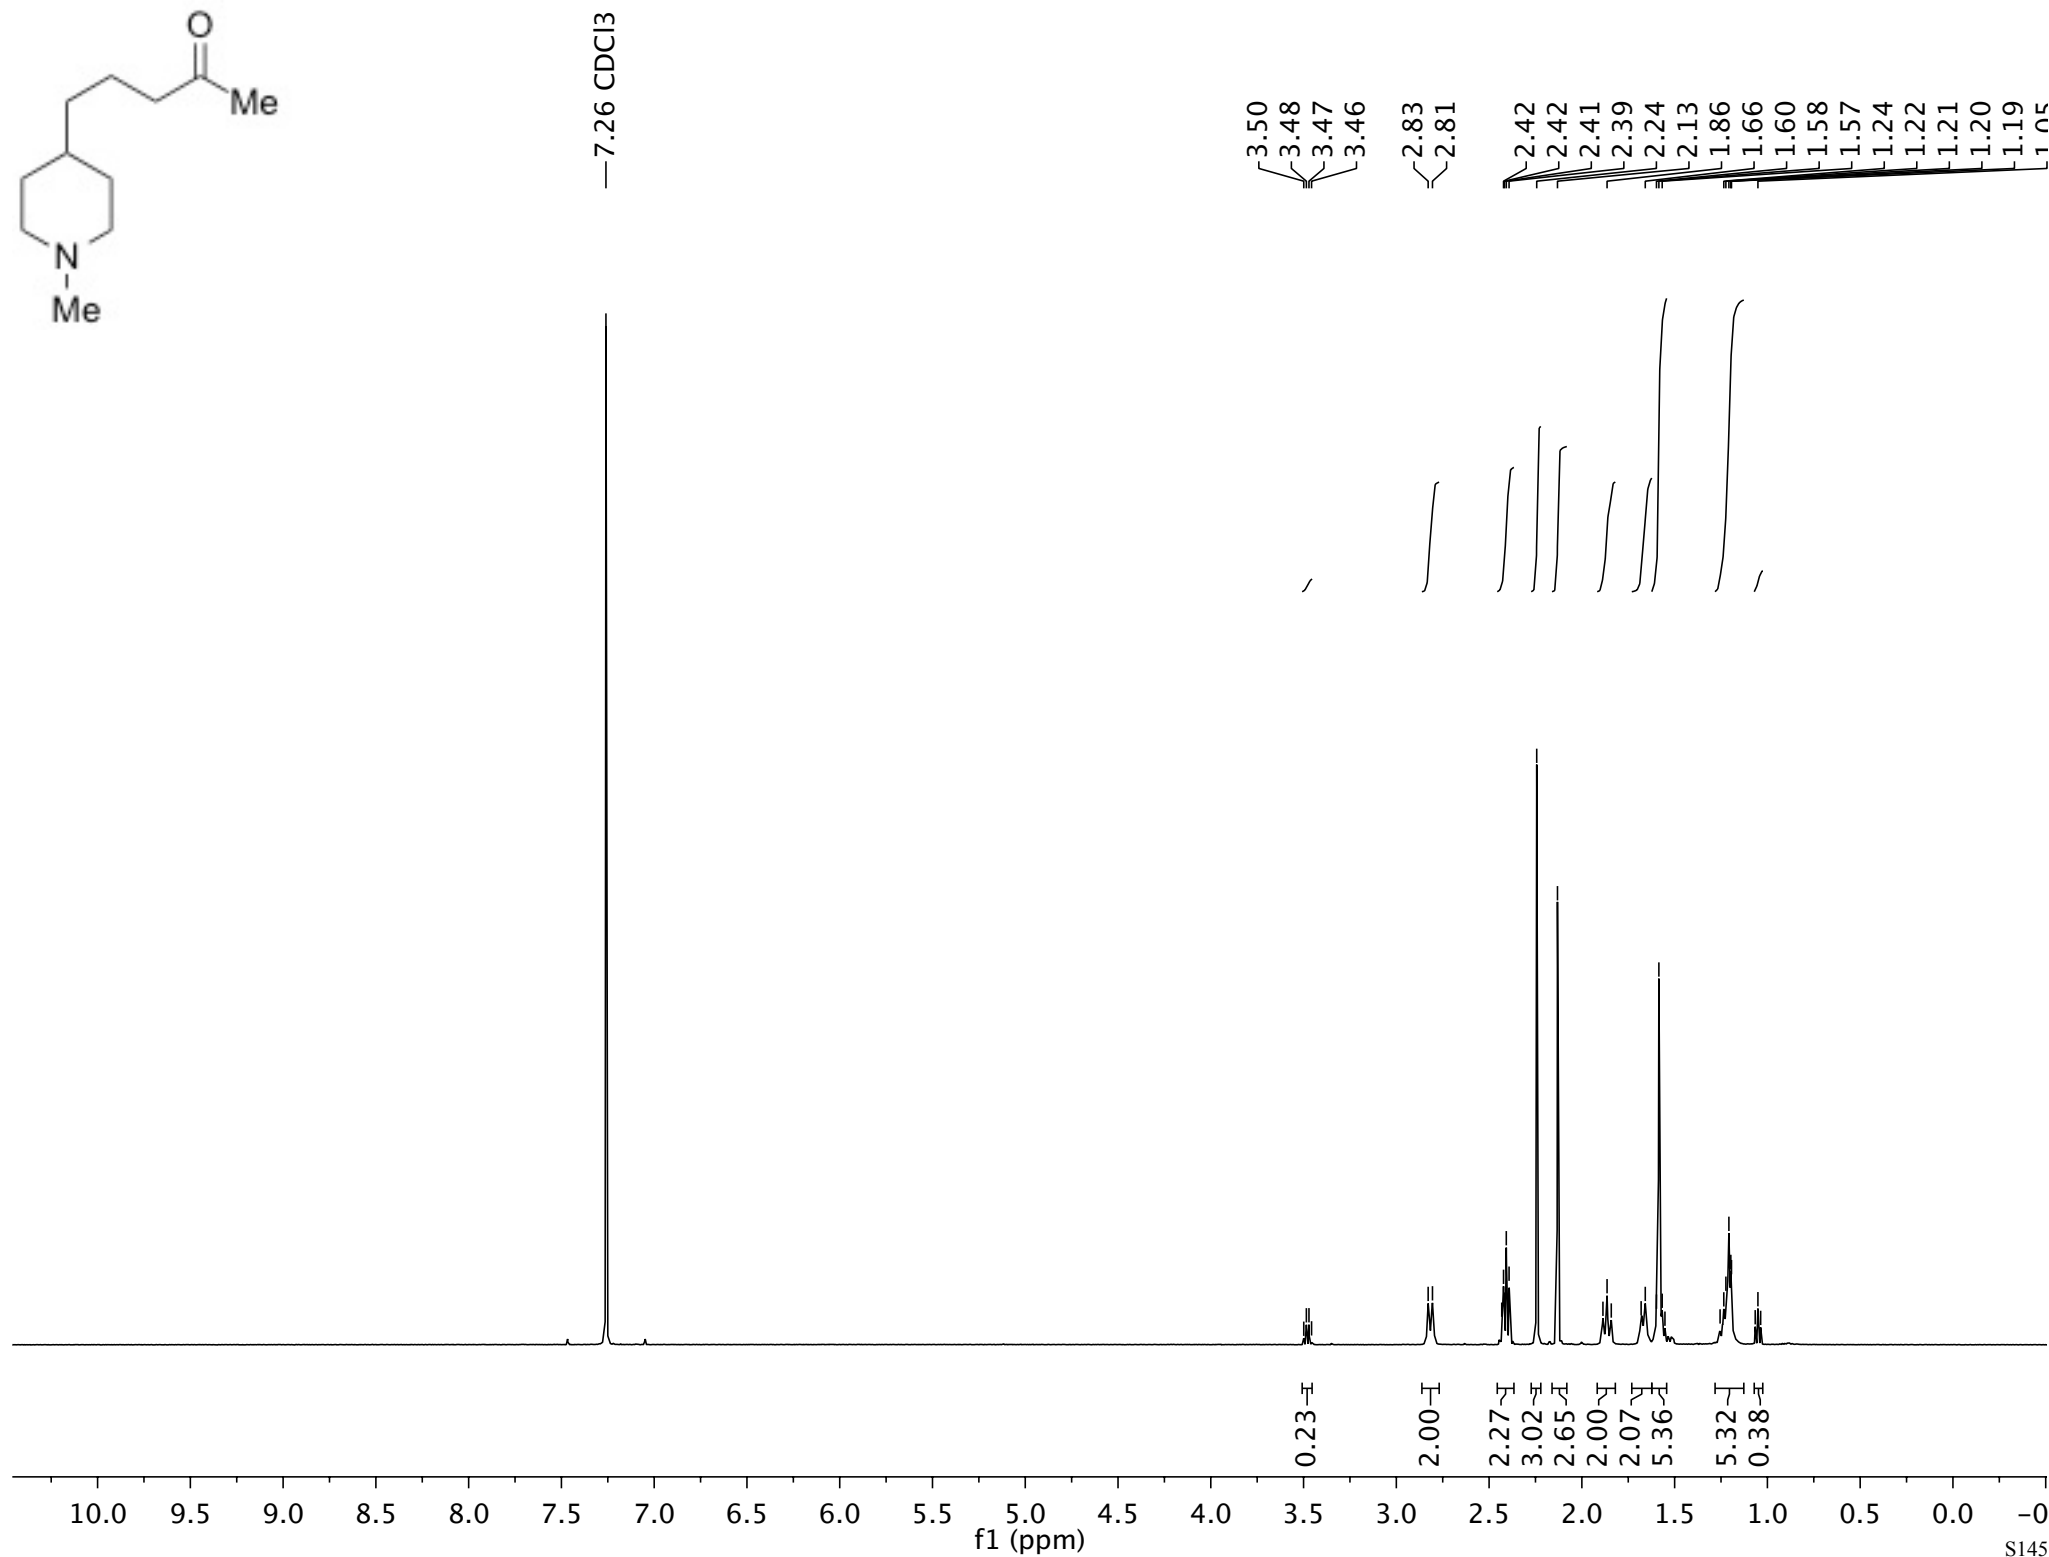

| Parameter              | Value   |
|------------------------|---------|
| Origin                 | Varian  |
| Spectrometer           | inova   |
| Solvent                | CDCl3   |
| Temperature            | 20.0    |
| Pulse Sequence         | s2pul   |
| Experiment             | 1D      |
| Probe                  | quad94  |
| Receiver Gain          | 60      |
| Relaxation Delay       | 2.0000  |
| Pulse Width            | 0.0000  |
| Acquisition Time       | 1.3107  |
| Spectrometer Frequency | 100.58  |
| Spectral Width         | 25000.0 |
| Lowest Frequency       | -1025.4 |
| Nucleus                | 13C     |
| Acquired Size          | 32768   |
| Spectral Size          | 65536   |

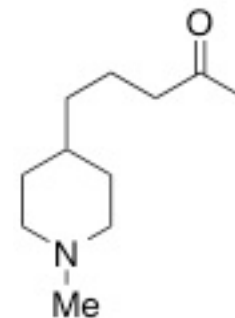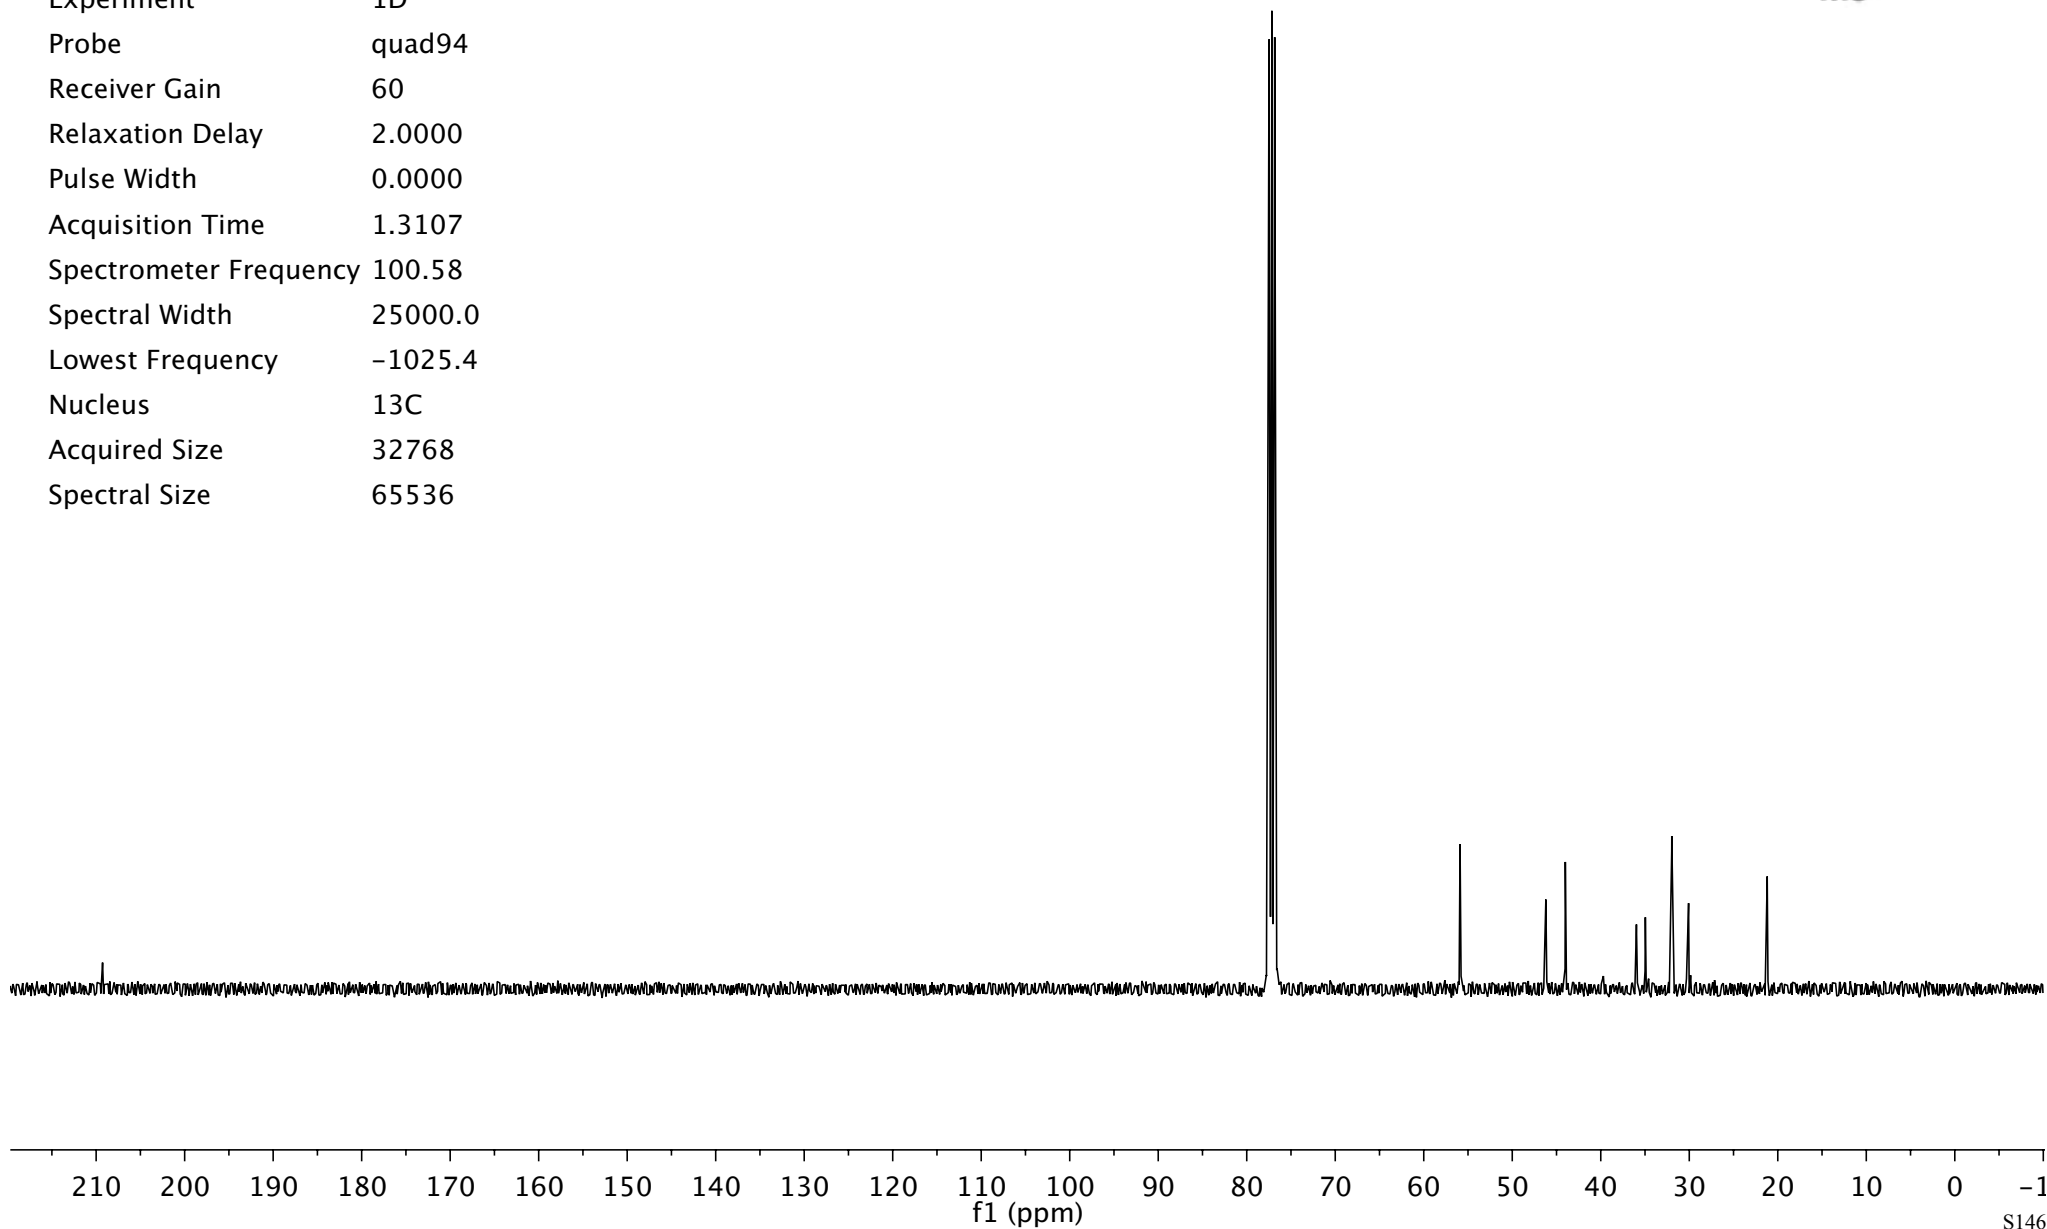

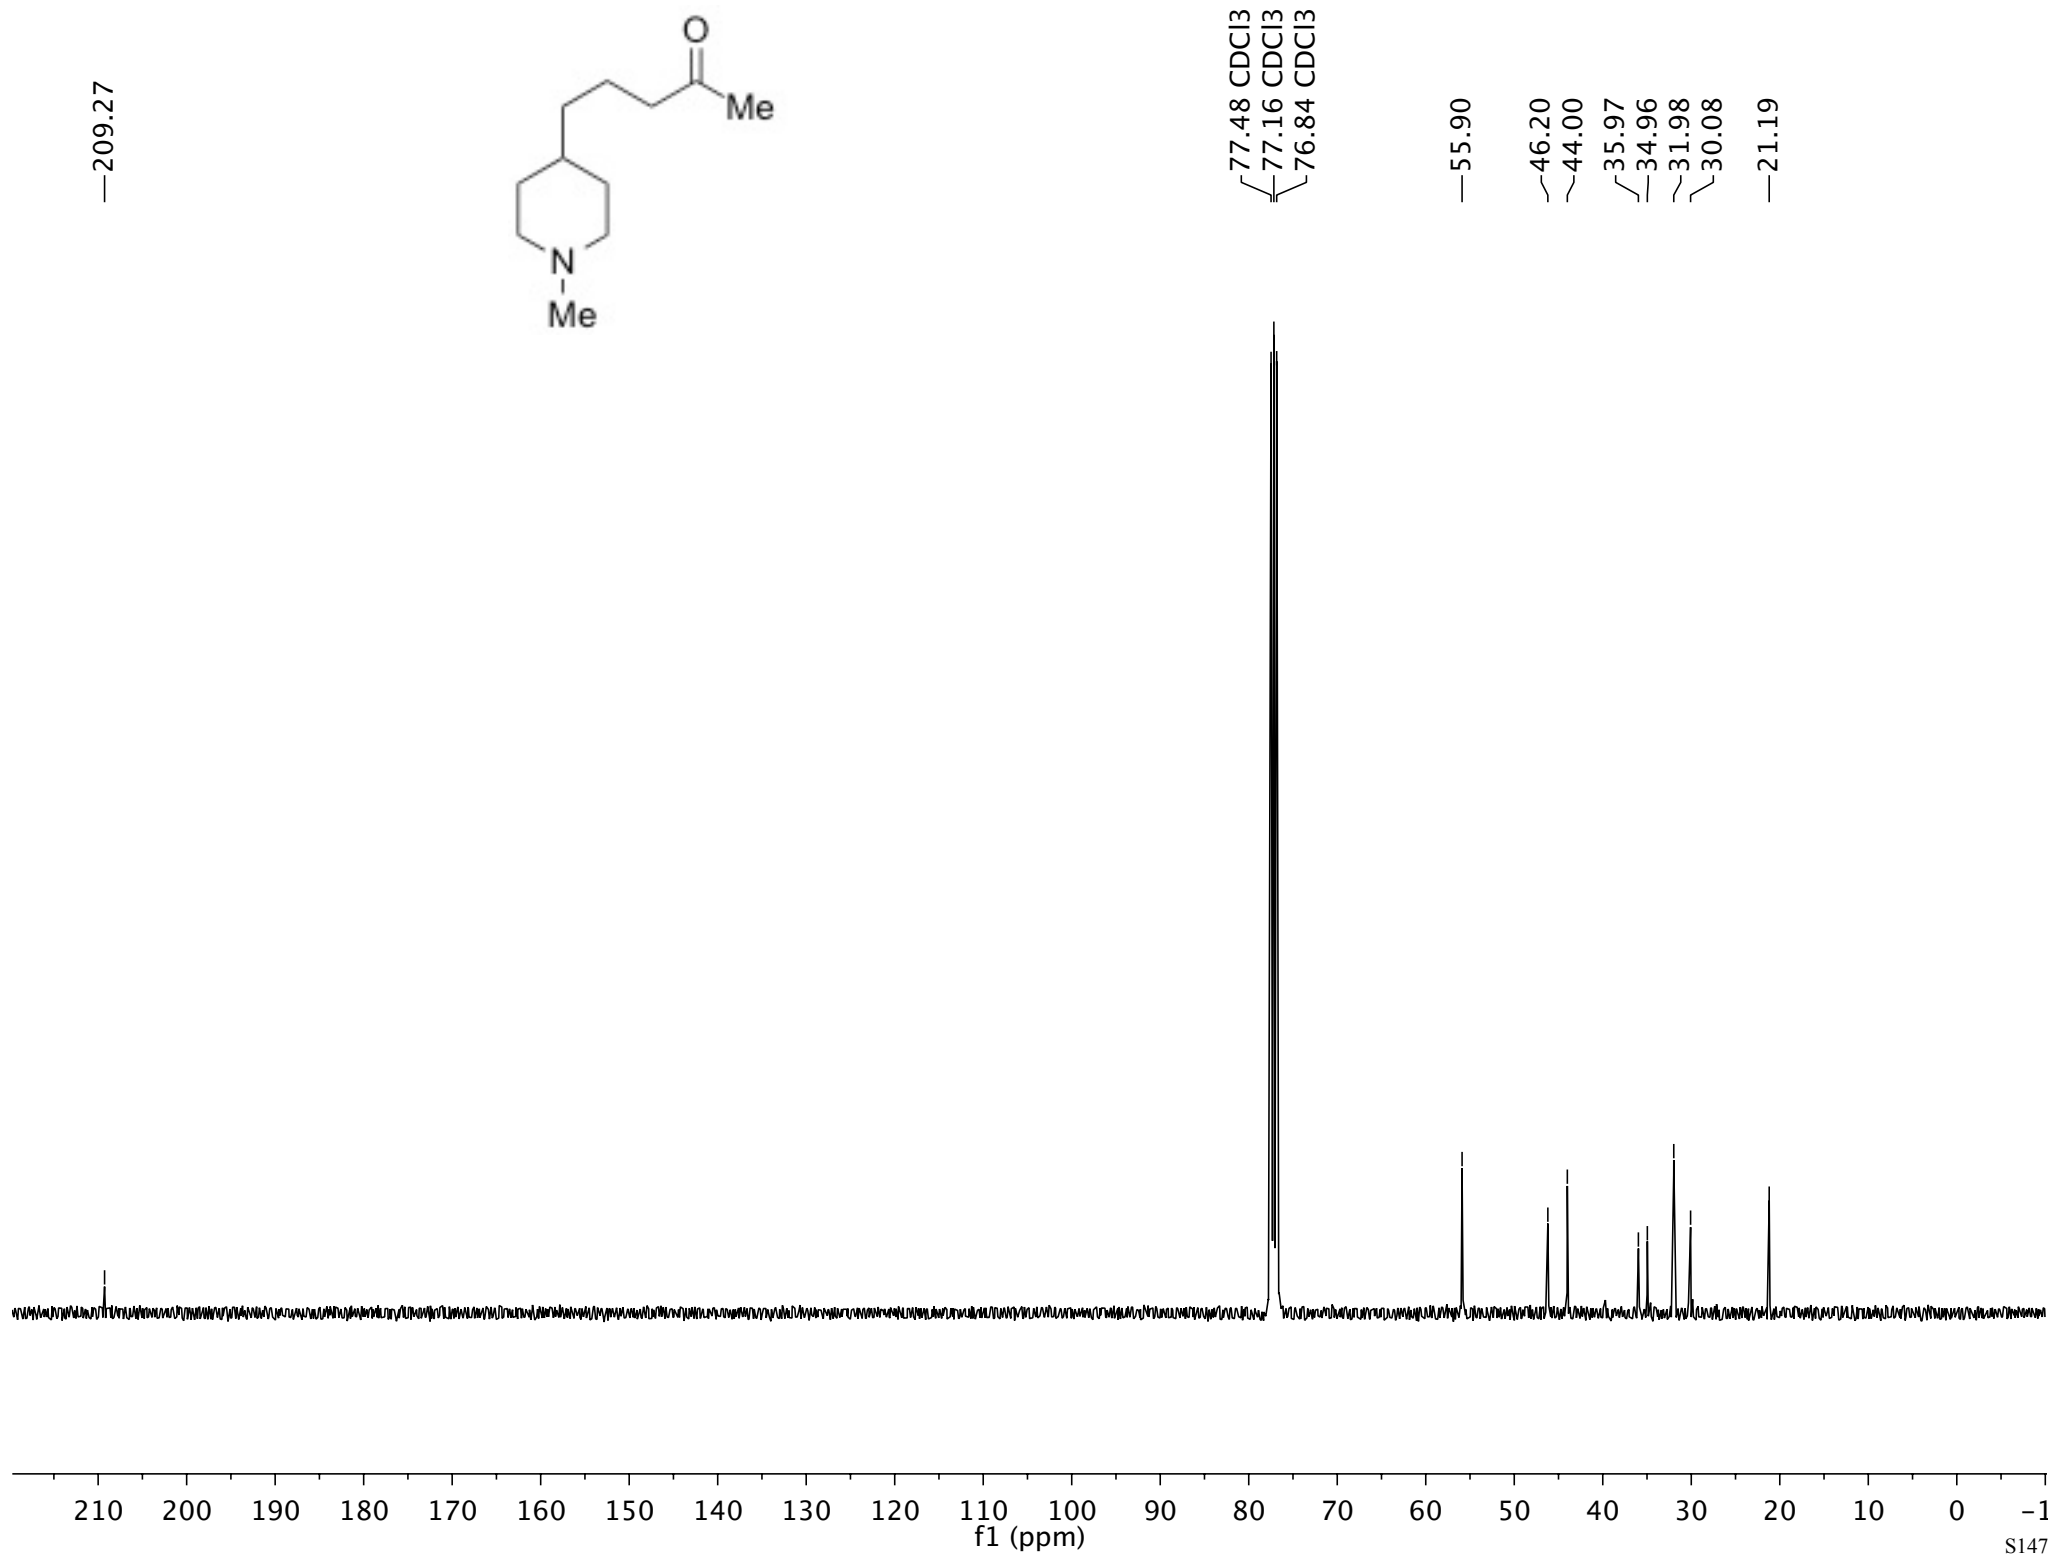

| Parameter              | Value          |
|------------------------|----------------|
| Origin                 | Varian         |
| Spectrometer           | inova          |
| Solvent                | CDCl3          |
| Temperature            | 20.0           |
| Pulse Sequence         | s2pul          |
| Experiment             | 1D             |
| Probe                  | quad94         |
| Receiver Gain          | 46             |
| Relaxation Delay       | 10.0000        |
| Pulse Width            | 0.0000         |
| Acquisition Time       | 4.0960         |
| Spectrometer Frequency | 399.95         |
| Spectral Width         | 8000.0         |
| Lowest Frequency       | -2424.5        |
| Nucleus                | <sup>1</sup> H |
| Acquired Size          | 32768          |
| Spectral Size          | 65536          |

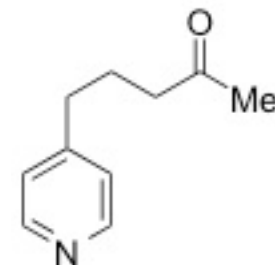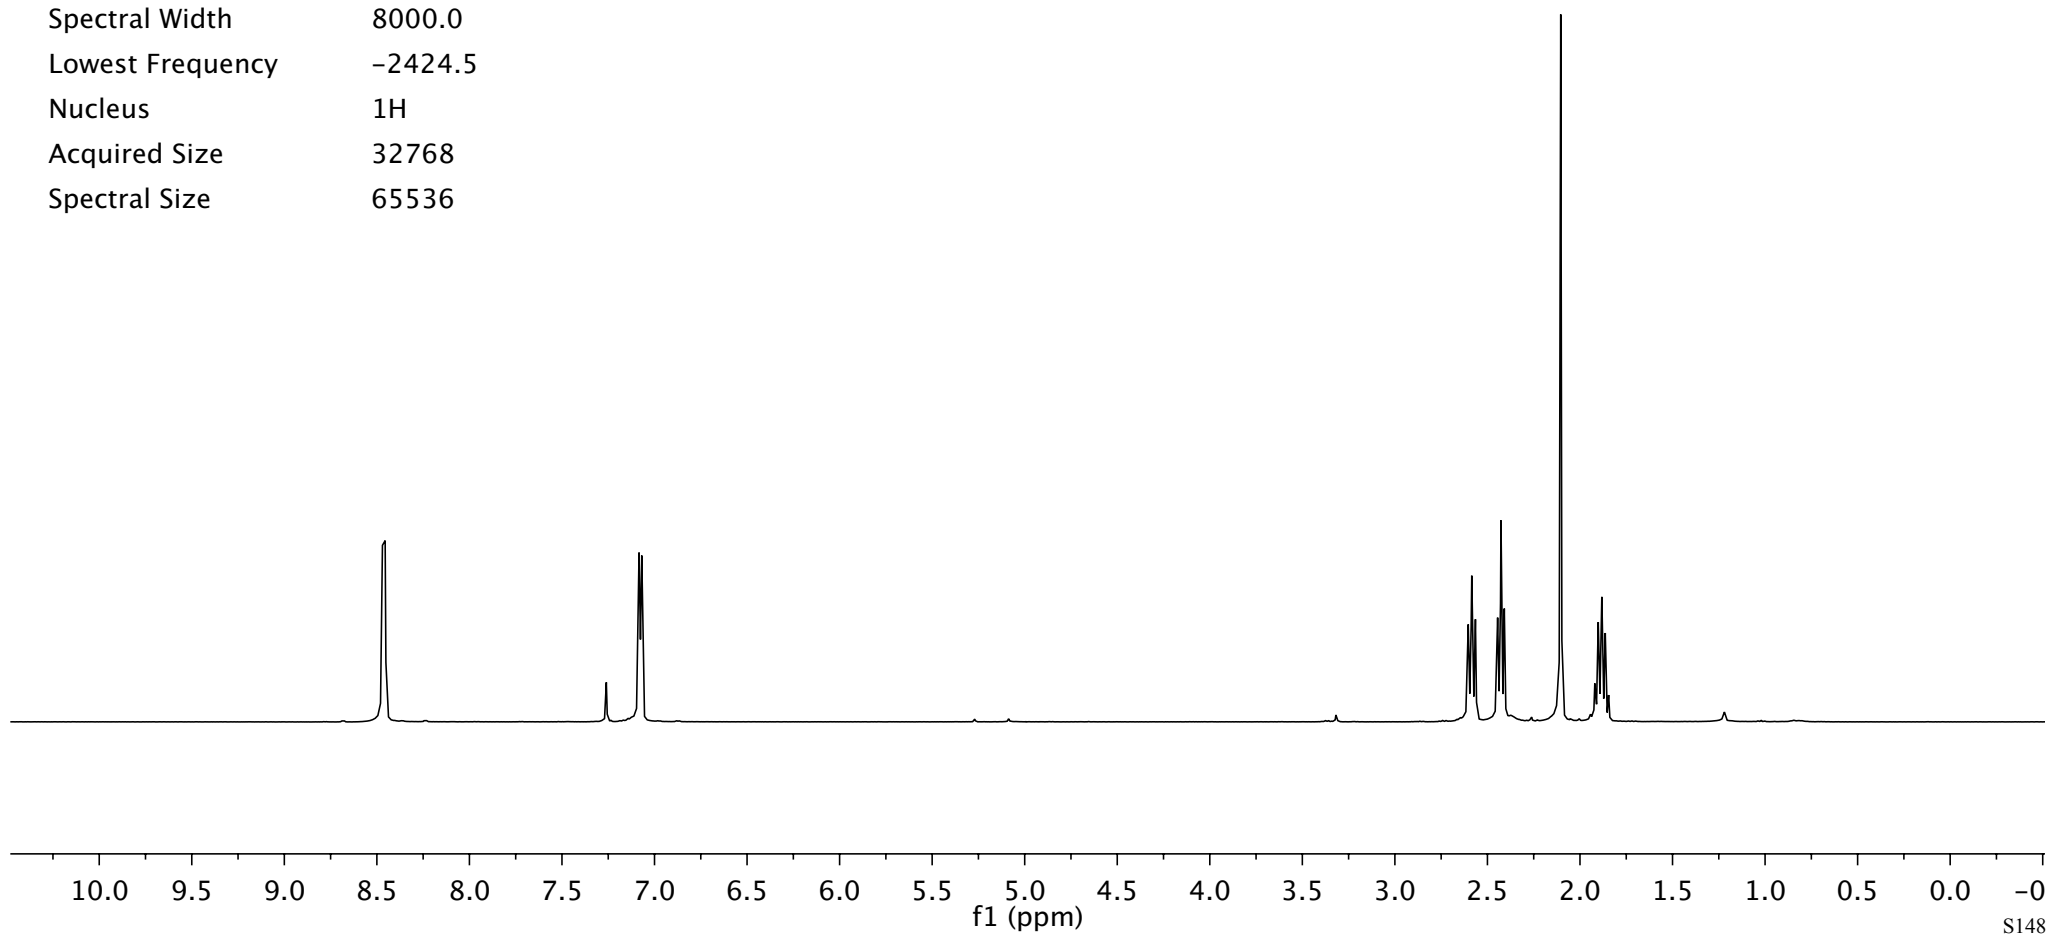

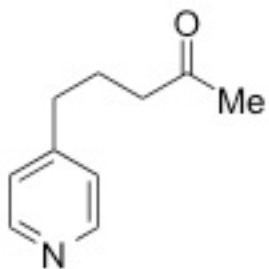

8.47  
8.47  
8.46  
8.46

7.26 CDCl<sub>3</sub>

7.08  
7.07

2.60  
2.58  
2.56  
2.44  
2.43  
2.41  
2.10  
1.92  
1.90  
1.88  
1.86  
1.85

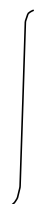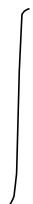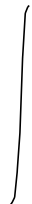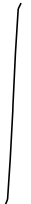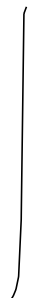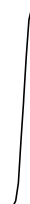

1.95

1.97

2.00

2.03

2.92

1.99

10.0 9.5 9.0 8.5 8.0 7.5 7.0 6.5 6.0 5.5 5.0 4.5 4.0 3.5 3.0 2.5 2.0 1.5 1.0 0.5 0.0 -0

f1 (ppm)

| Parameter              | Value           |
|------------------------|-----------------|
| Origin                 | Varian          |
| Spectrometer           | inova           |
| Solvent                | CDCl3           |
| Temperature            | 20.0            |
| Pulse Sequence         | s2pul           |
| Experiment             | 1D              |
| Probe                  | quad94          |
| Receiver Gain          | 60              |
| Relaxation Delay       | 2.0000          |
| Pulse Width            | 0.0000          |
| Acquisition Time       | 1.3107          |
| Spectrometer Frequency | 100.58          |
| Spectral Width         | 25000.0         |
| Lowest Frequency       | -1031.7         |
| Nucleus                | <sup>13</sup> C |
| Acquired Size          | 32768           |
| Spectral Size          | 65536           |

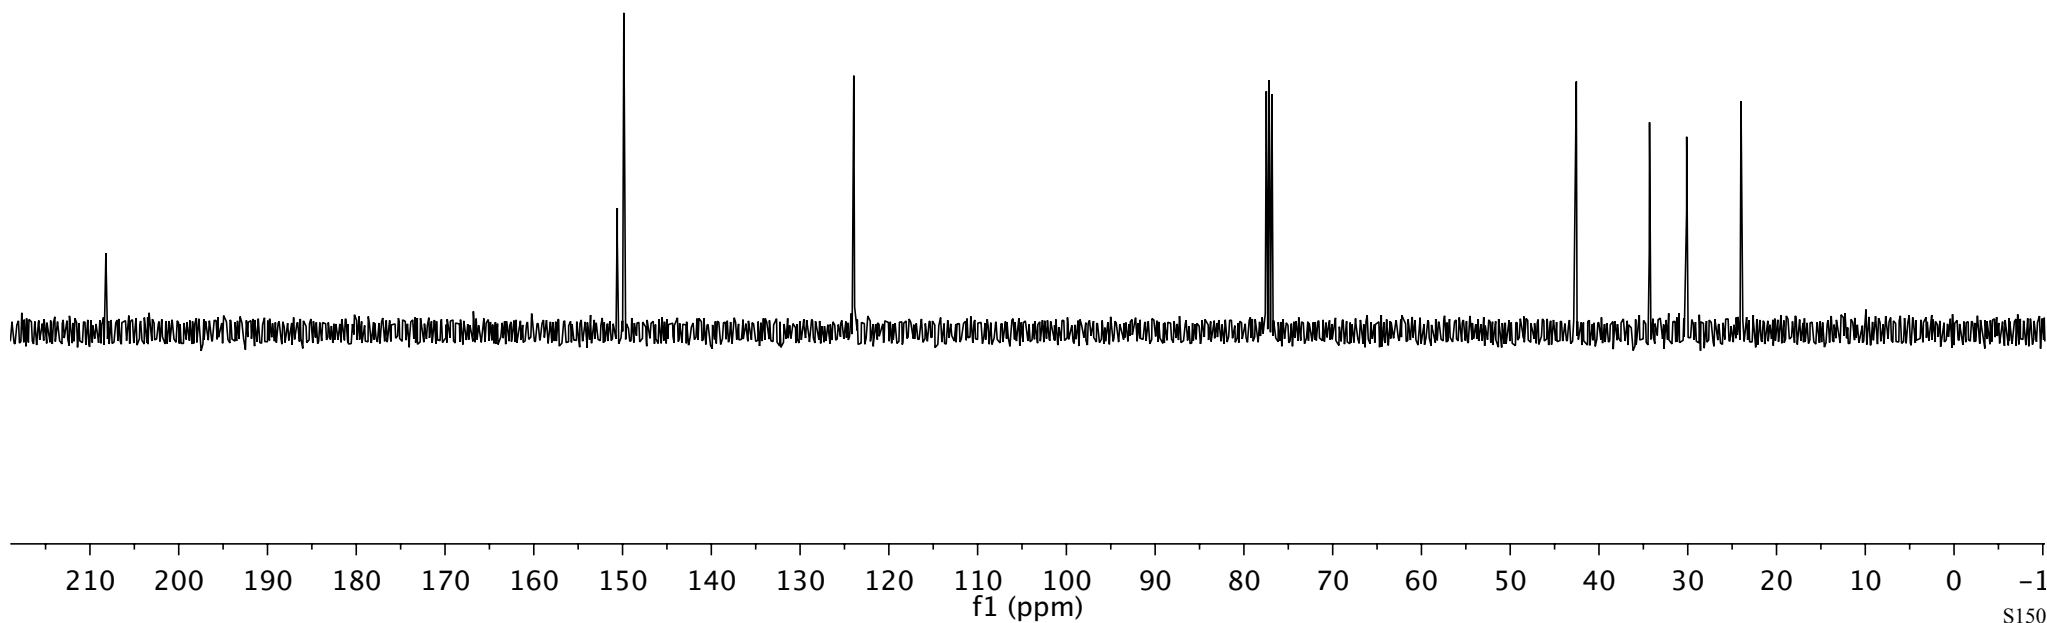

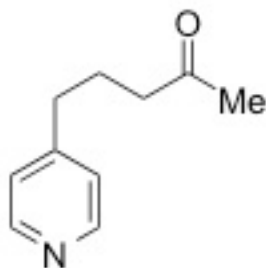

—208.20

150.60  
149.84

—123.94

77.48 CDCl3  
77.16 CDCl3  
76.84 CDCl3

—42.56

34.31  
30.12  
24.00

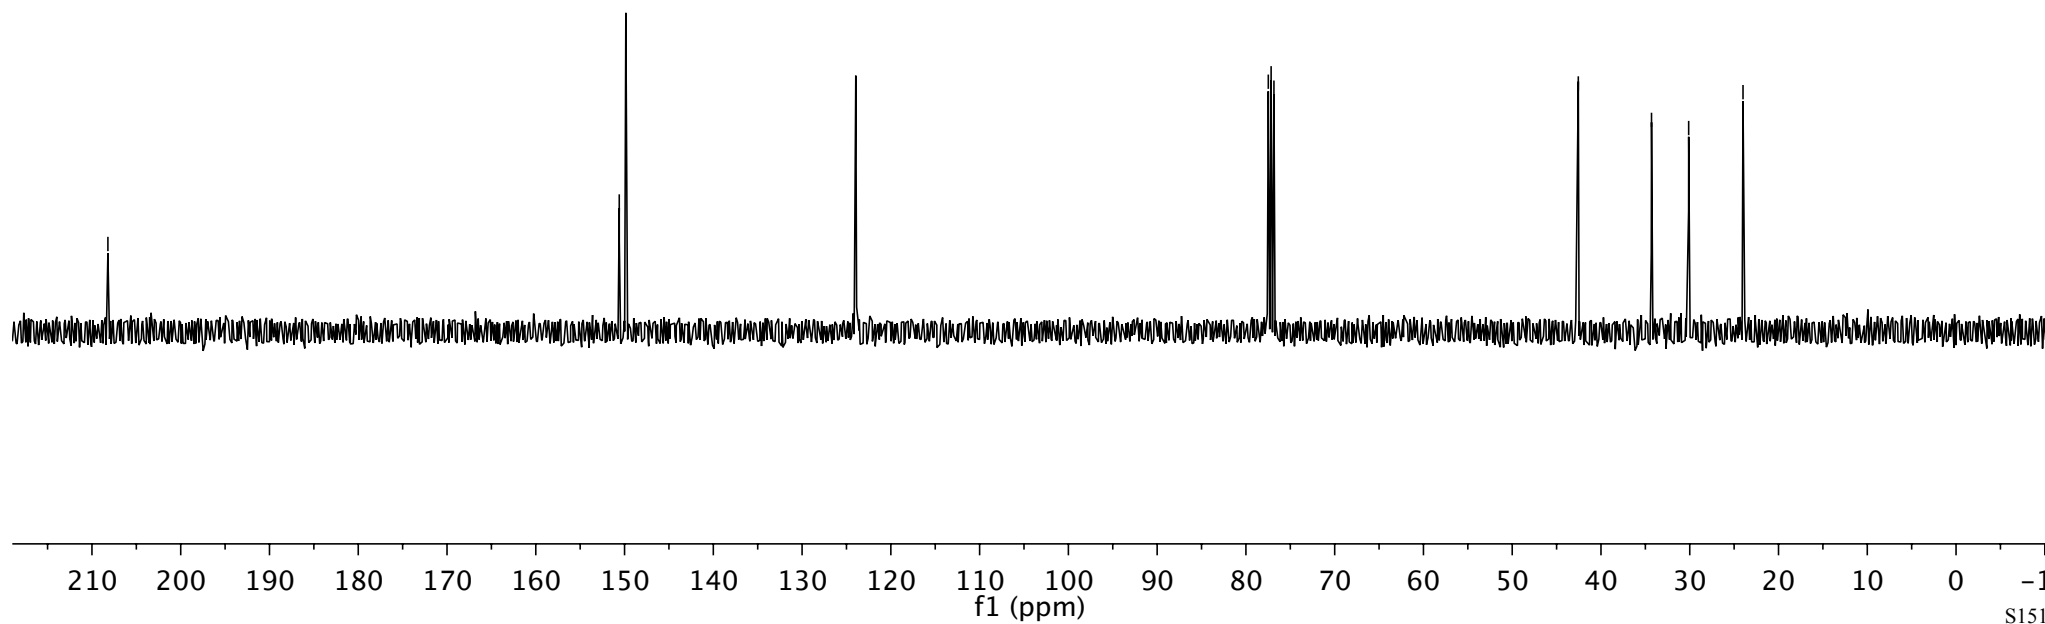



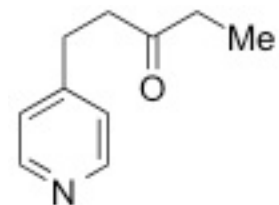

| Parameter              | Value          |
|------------------------|----------------|
| Origin                 | Varian         |
| Spectrometer           | inova          |
| Solvent                | CDCl3          |
| Temperature            | 20.0           |
| Pulse Sequence         | s2pul          |
| Experiment             | 1D             |
| Probe                  | quad94         |
| Receiver Gain          | 58             |
| Relaxation Delay       | 10.0000        |
| Pulse Width            | 0.0000         |
| Acquisition Time       | 4.0960         |
| Spectrometer Frequency | 399.95         |
| Spectral Width         | 8000.0         |
| Lowest Frequency       | -2424.5        |
| Nucleus                | <sup>1</sup> H |
| Acquired Size          | 32768          |
| Spectral Size          | 65536          |

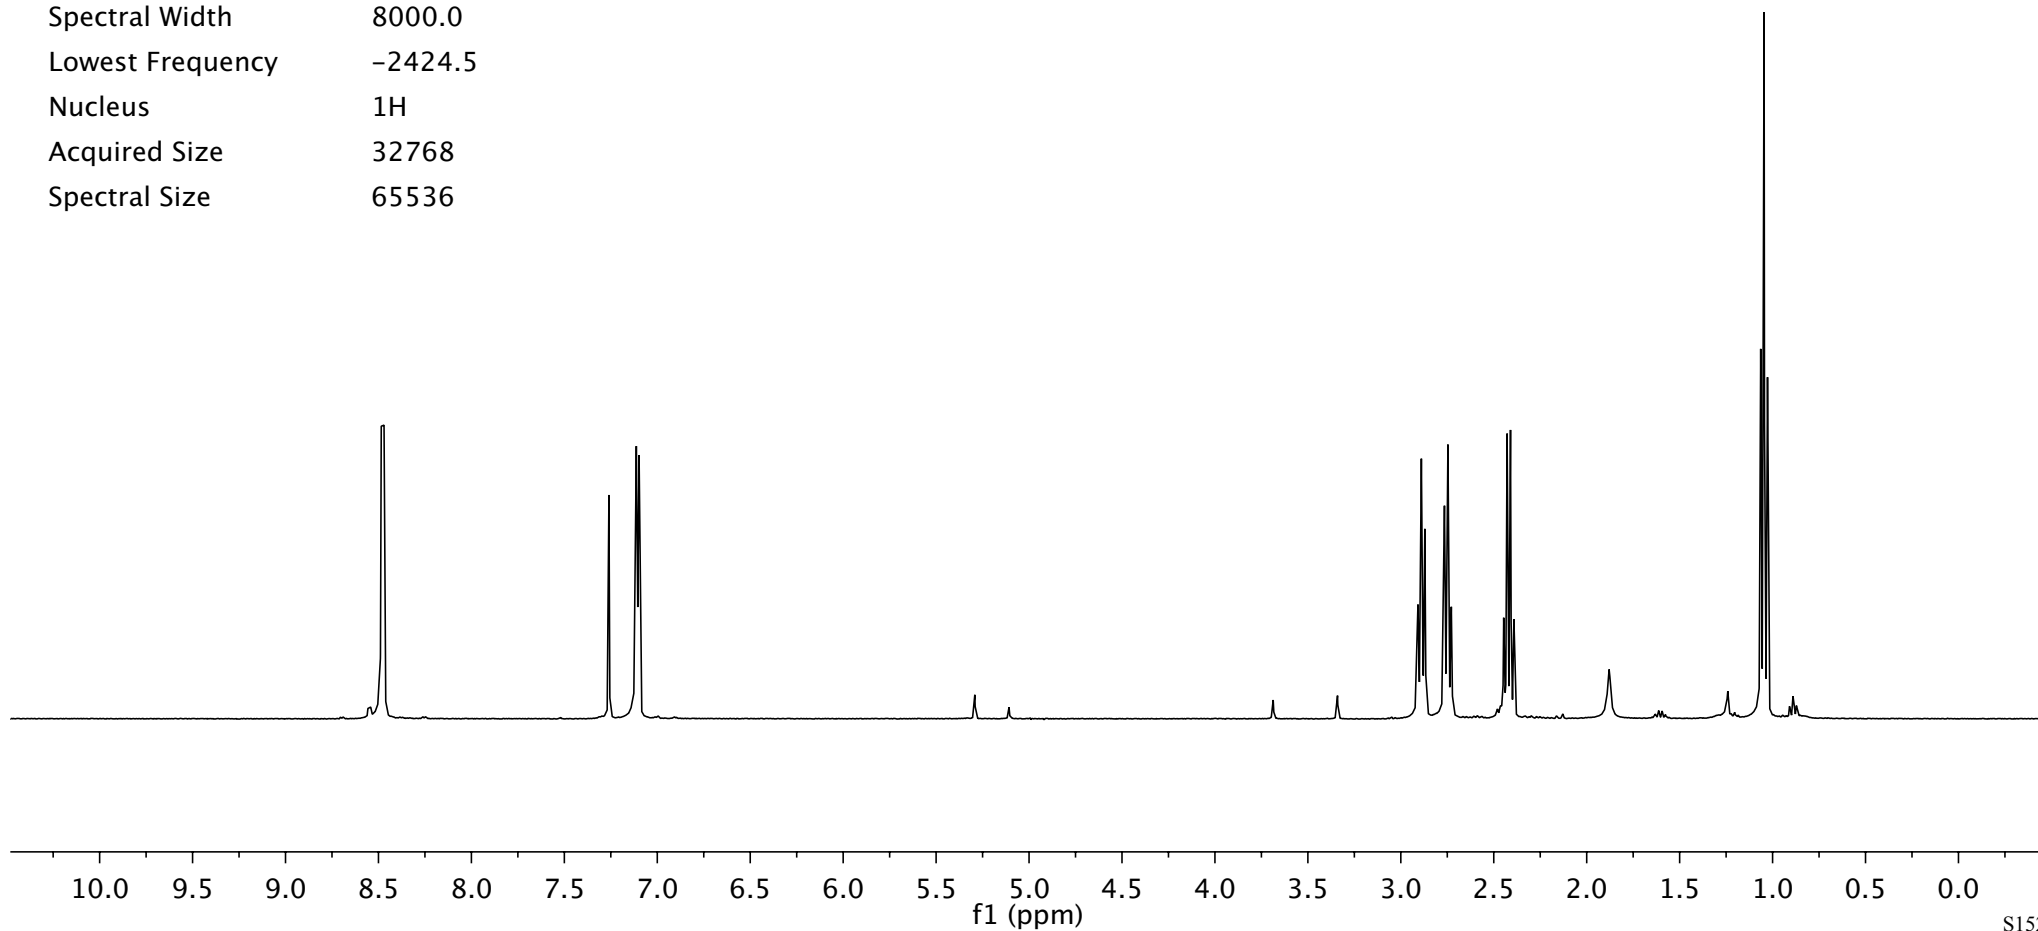

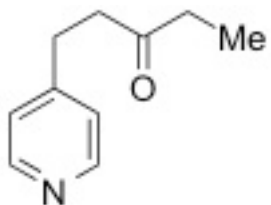

8.49  
8.48  
8.47  
8.47

7.26 CDCl<sub>3</sub>  
7.11  
7.10

2.91  
2.89  
2.87  
2.77  
2.75  
2.73  
2.45  
2.43  
2.41  
2.39

1.06  
1.05  
1.03

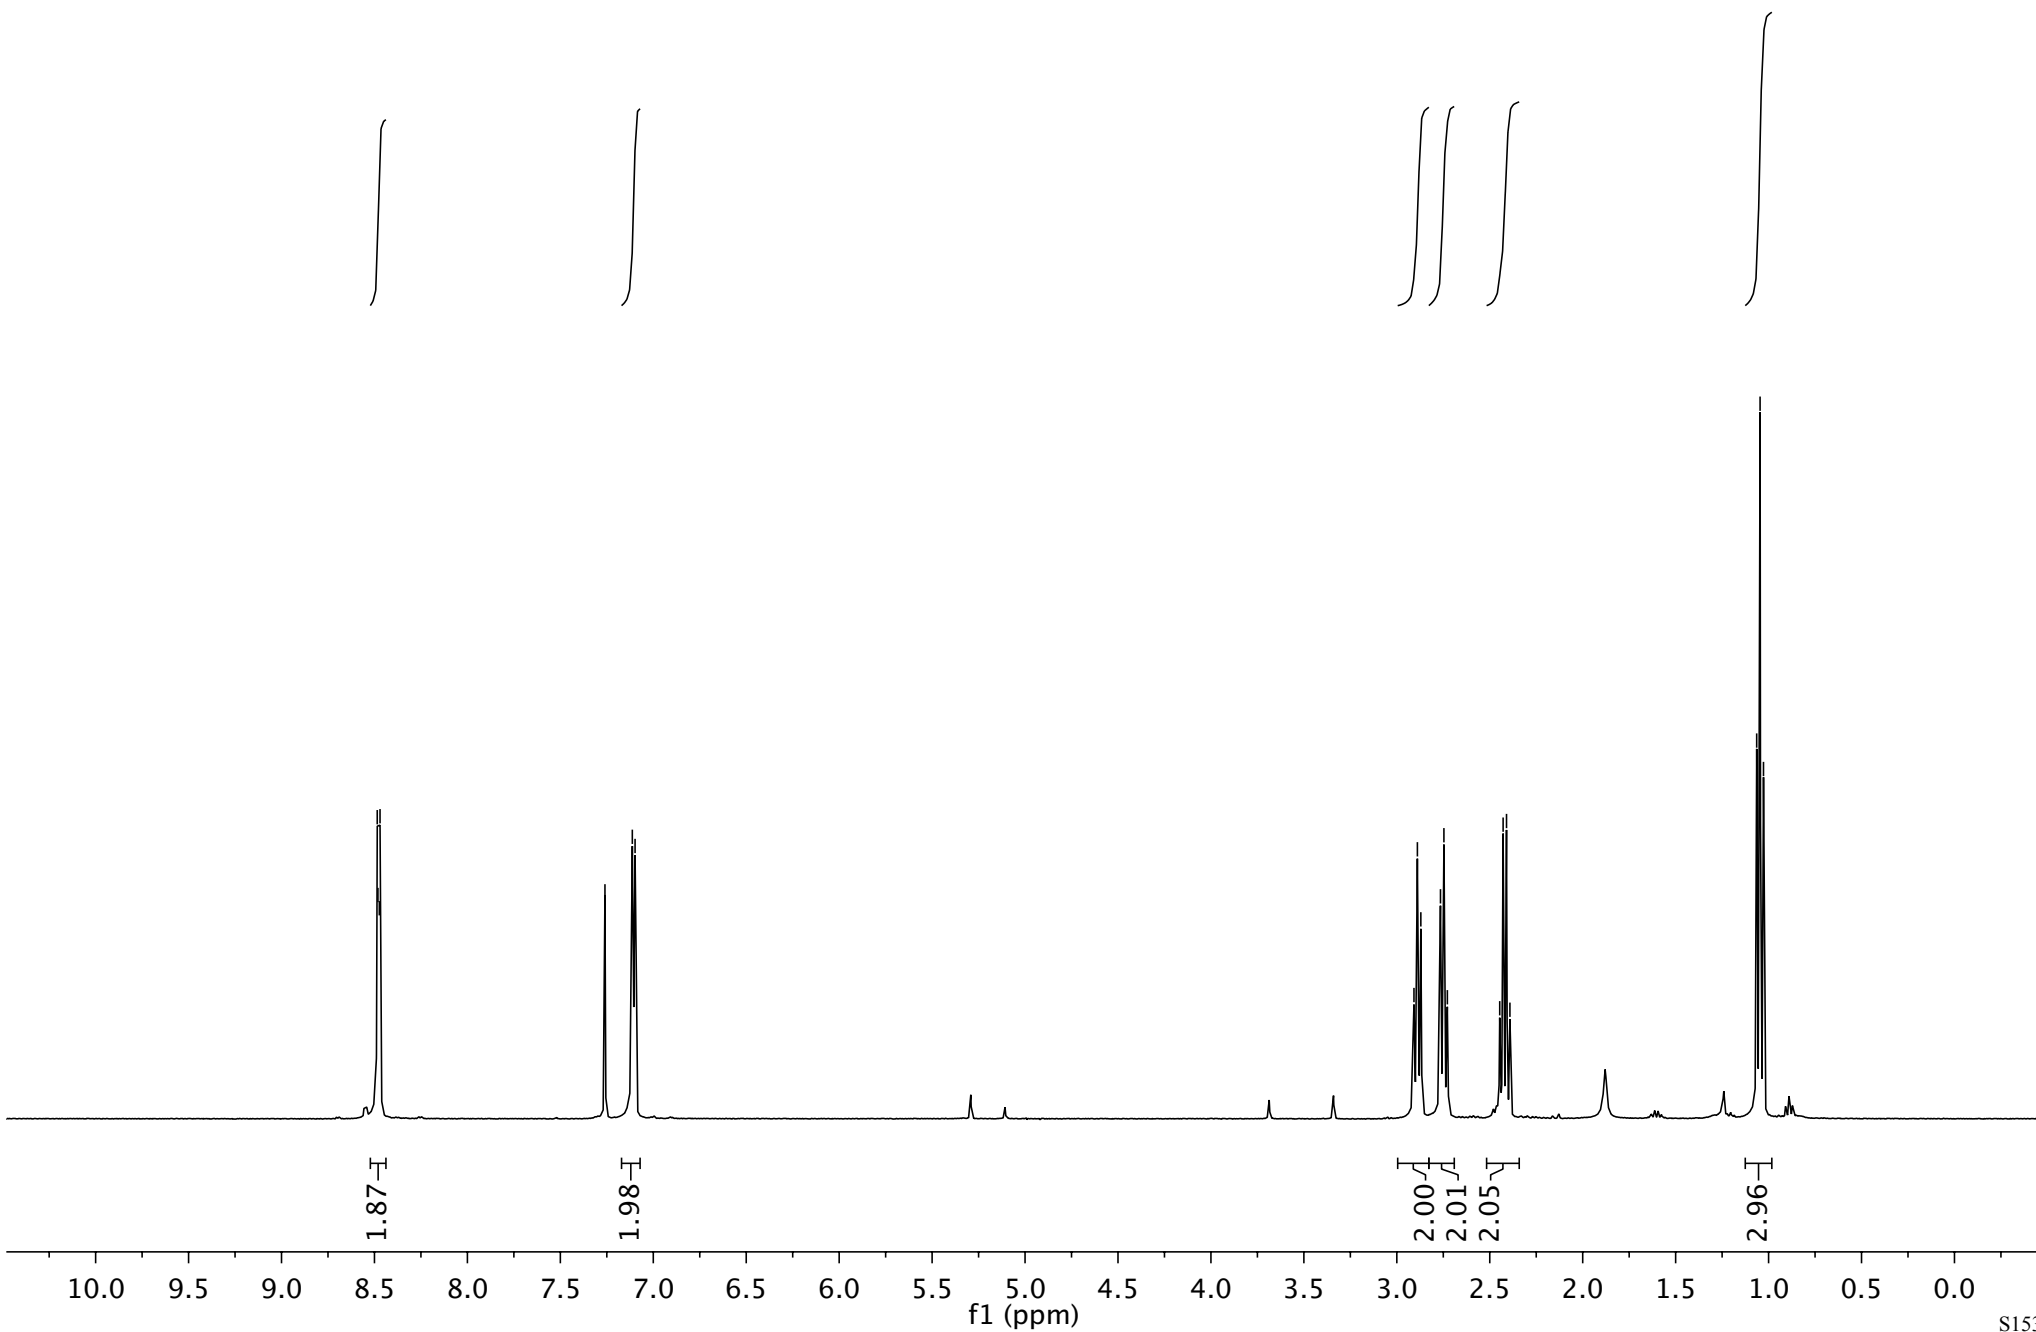



| Parameter              | Value             |
|------------------------|-------------------|
| Origin                 | Varian            |
| Spectrometer           | inova             |
| Solvent                | CDCl <sub>3</sub> |
| Temperature            | 20.0              |
| Pulse Sequence         | s2pul             |
| Experiment             | 1D                |
| Probe                  | quad94            |
| Receiver Gain          | 60                |
| Relaxation Delay       | 2.0000            |
| Pulse Width            | 0.0000            |
| Acquisition Time       | 1.3107            |
| Spectrometer Frequency | 100.58            |
| Spectral Width         | 25000.0           |
| Lowest Frequency       | -1026.6           |
| Nucleus                | <sup>13</sup> C   |
| Acquired Size          | 32768             |
| Spectral Size          | 65536             |

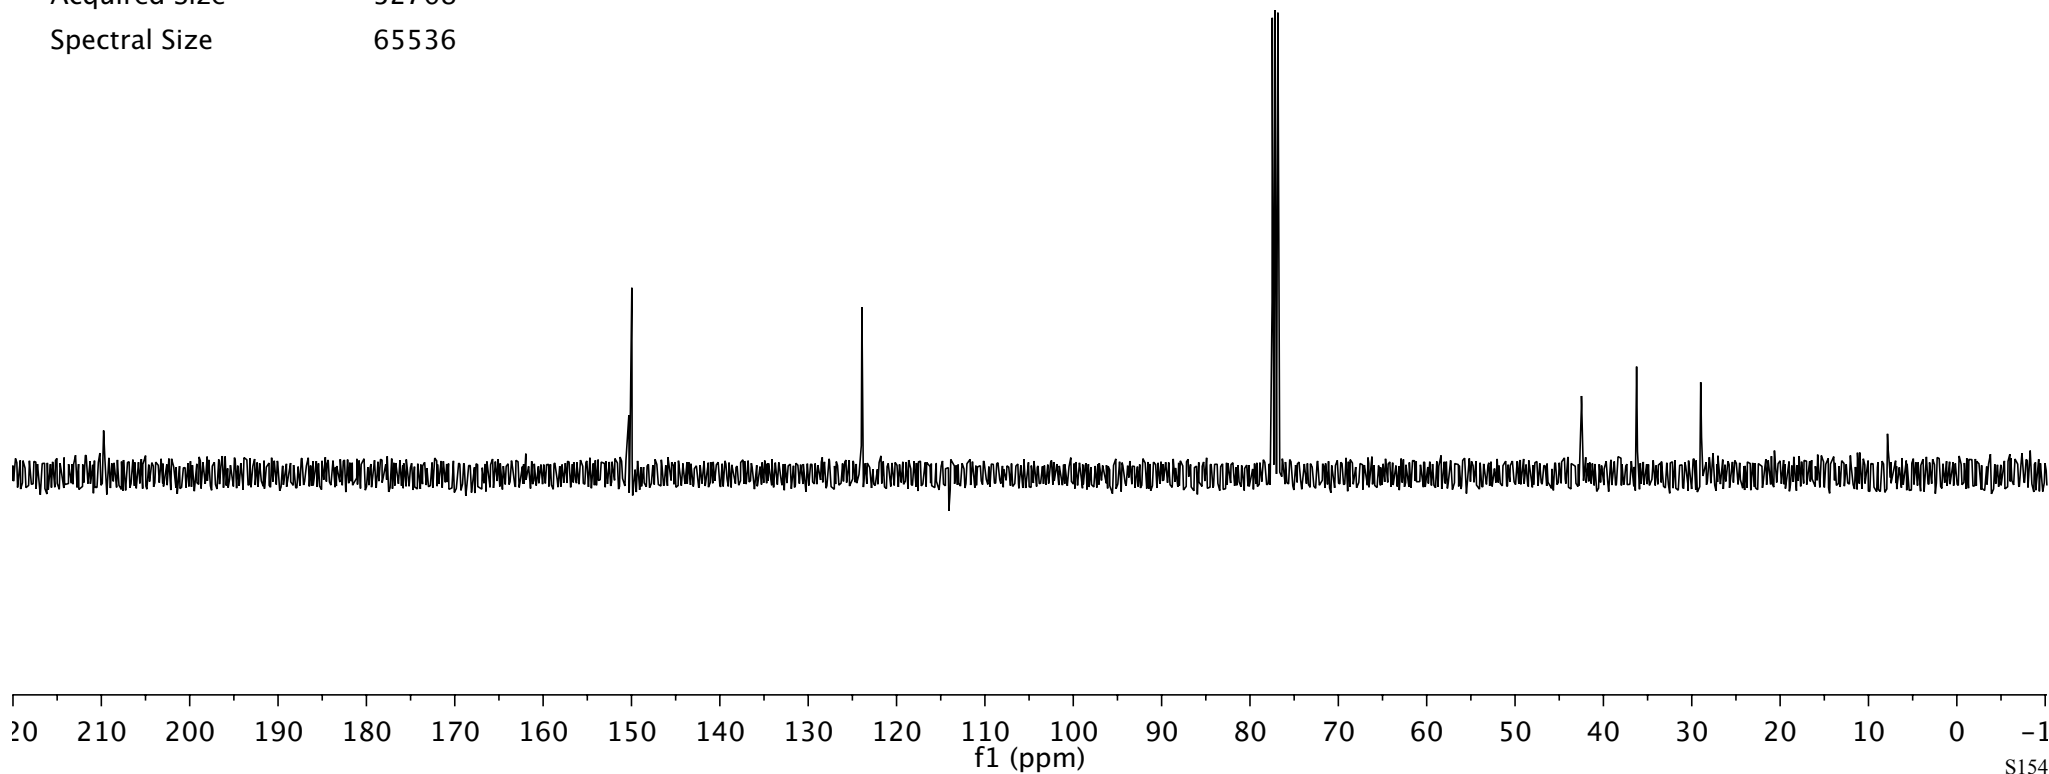

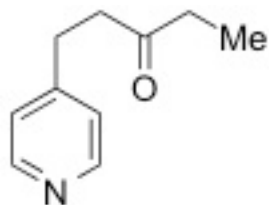

—209.74

150.30  
149.96

—123.92

77.48 CDCl<sub>3</sub>  
77.16 CDCl<sub>3</sub>  
76.84 CDCl<sub>3</sub>

42.47  
36.24  
28.98

—7.84

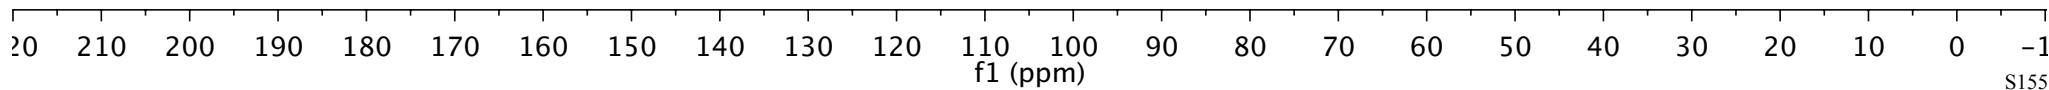

| Parameter              | Value          |
|------------------------|----------------|
| Origin                 | Varian         |
| Spectrometer           | inova          |
| Solvent                | CDCl3          |
| Temperature            | 20.0           |
| Pulse Sequence         | s2pul          |
| Experiment             | 1D             |
| Probe                  | hcn            |
| Number of Scans        | 16             |
| Receiver Gain          | 32             |
| Relaxation Delay       | 2.0000         |
| Pulse Width            | 0.0000         |
| Acquisition Time       | 4.0960         |
| Spectrometer Frequency | 500.07         |
| Spectral Width         | 8000.0         |
| Lowest Frequency       | -1521.1        |
| Nucleus                | <sup>1</sup> H |
| Acquired Size          | 32768          |
| Spectral Size          | 65536          |

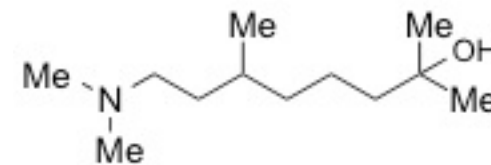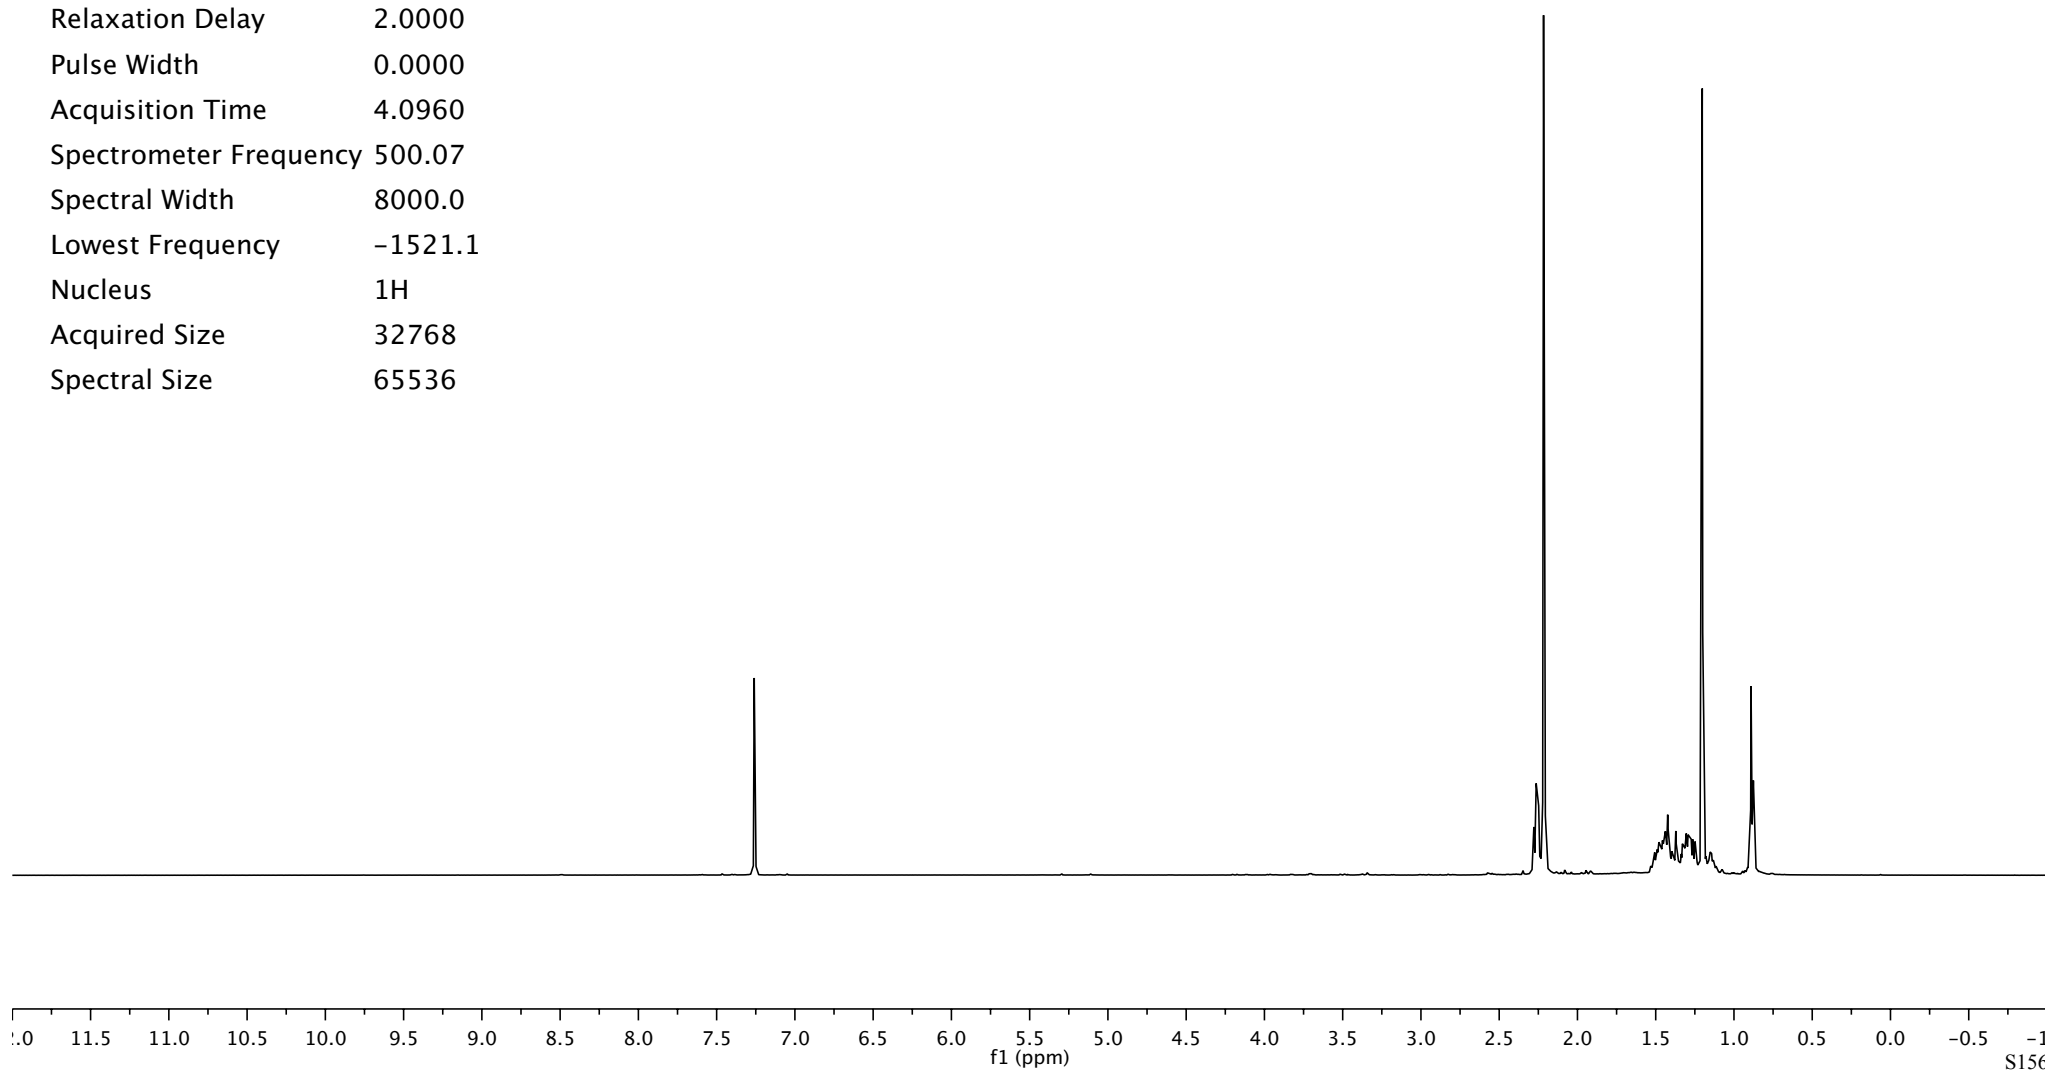

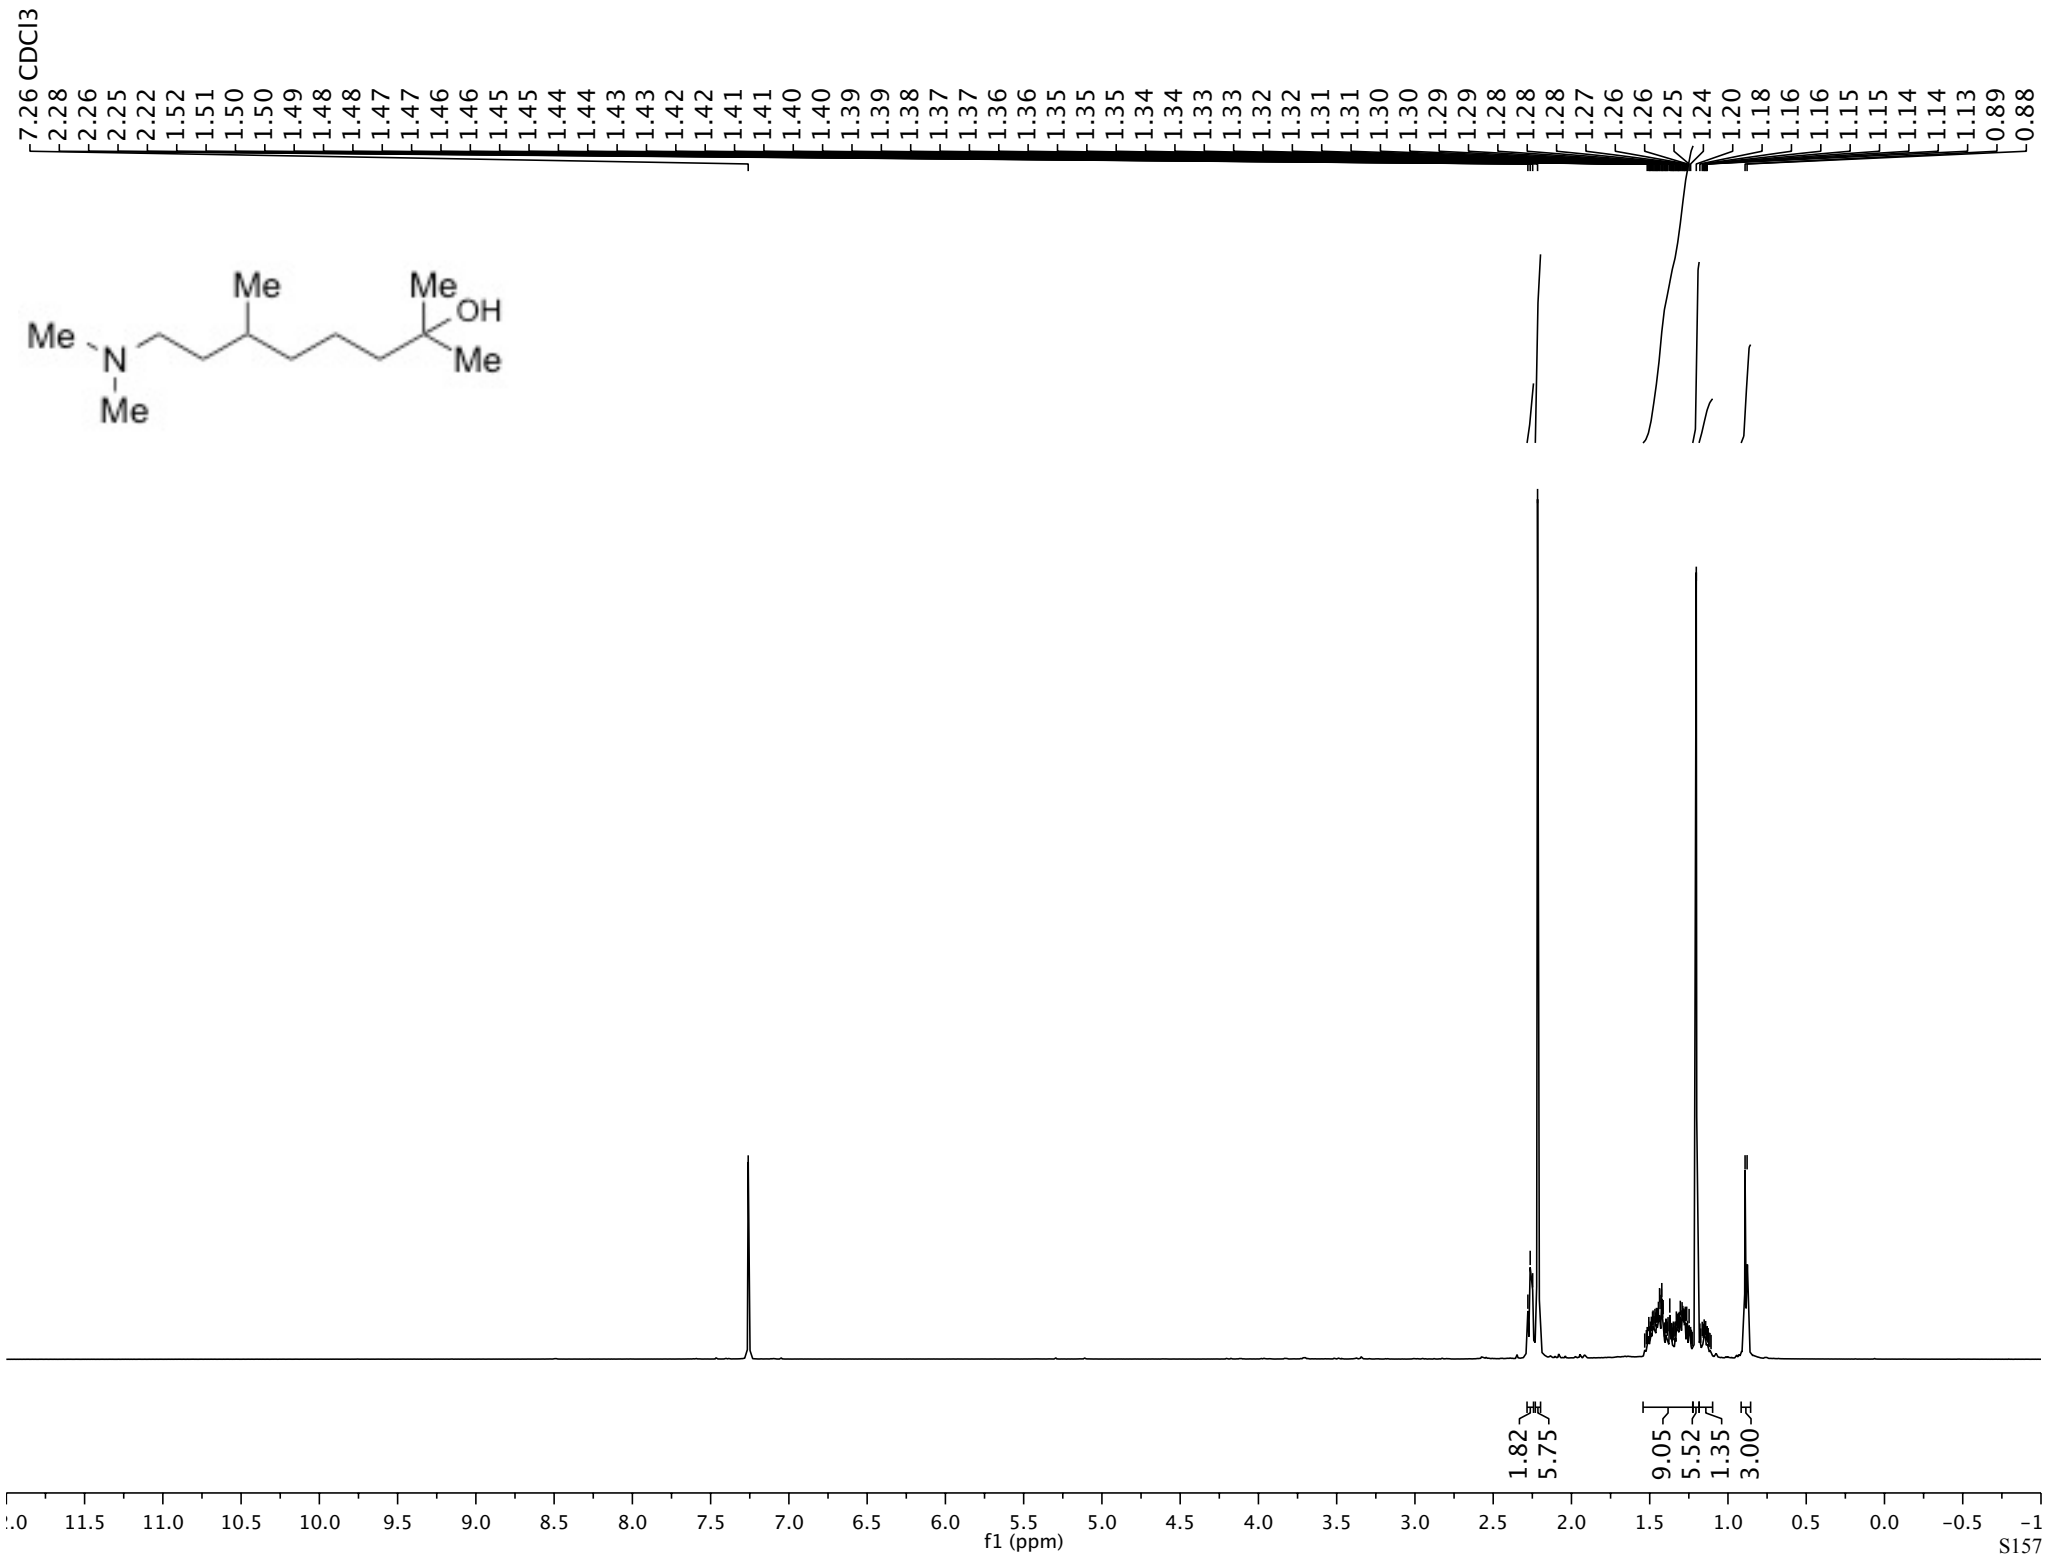

| Parameter              | Value           |
|------------------------|-----------------|
| Origin                 | Varian          |
| Spectrometer           | inova           |
| Solvent                | CDCl3           |
| Temperature            | 20.0            |
| Pulse Sequence         | s2pul           |
| Experiment             | 1D              |
| Probe                  | QUADG           |
| Number of Scans        | 783             |
| Receiver Gain          | 60              |
| Relaxation Delay       | 2.0000          |
| Pulse Width            | 0.0000          |
| Acquisition Time       | 1.0240          |
| Spectrometer Frequency | 125.60          |
| Spectral Width         | 32000.0         |
| Lowest Frequency       | -2200.4         |
| Nucleus                | <sup>13</sup> C |
| Acquired Size          | 32768           |
| Spectral Size          | 65536           |

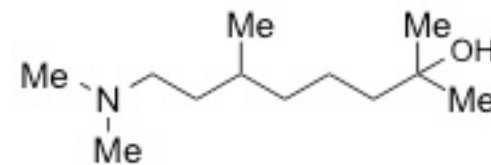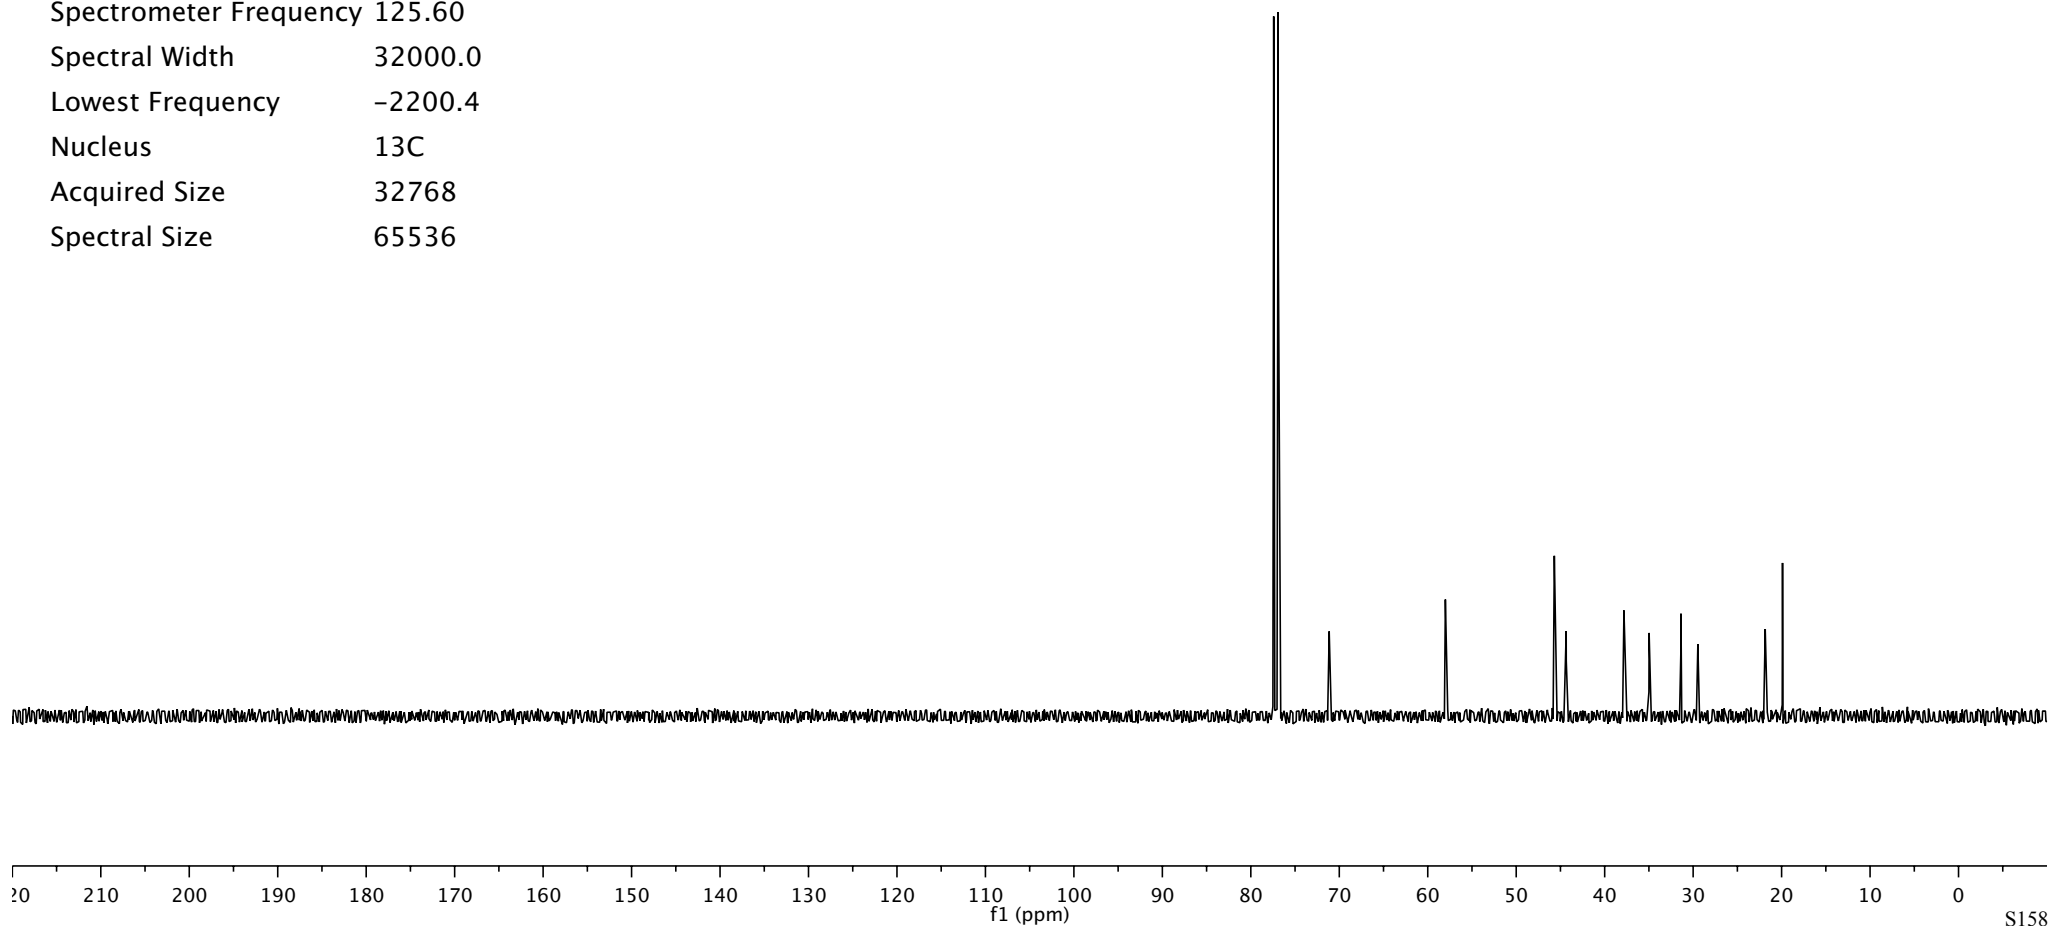

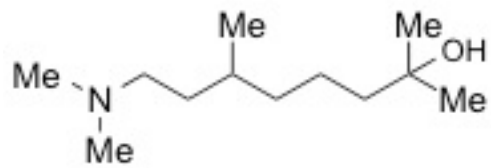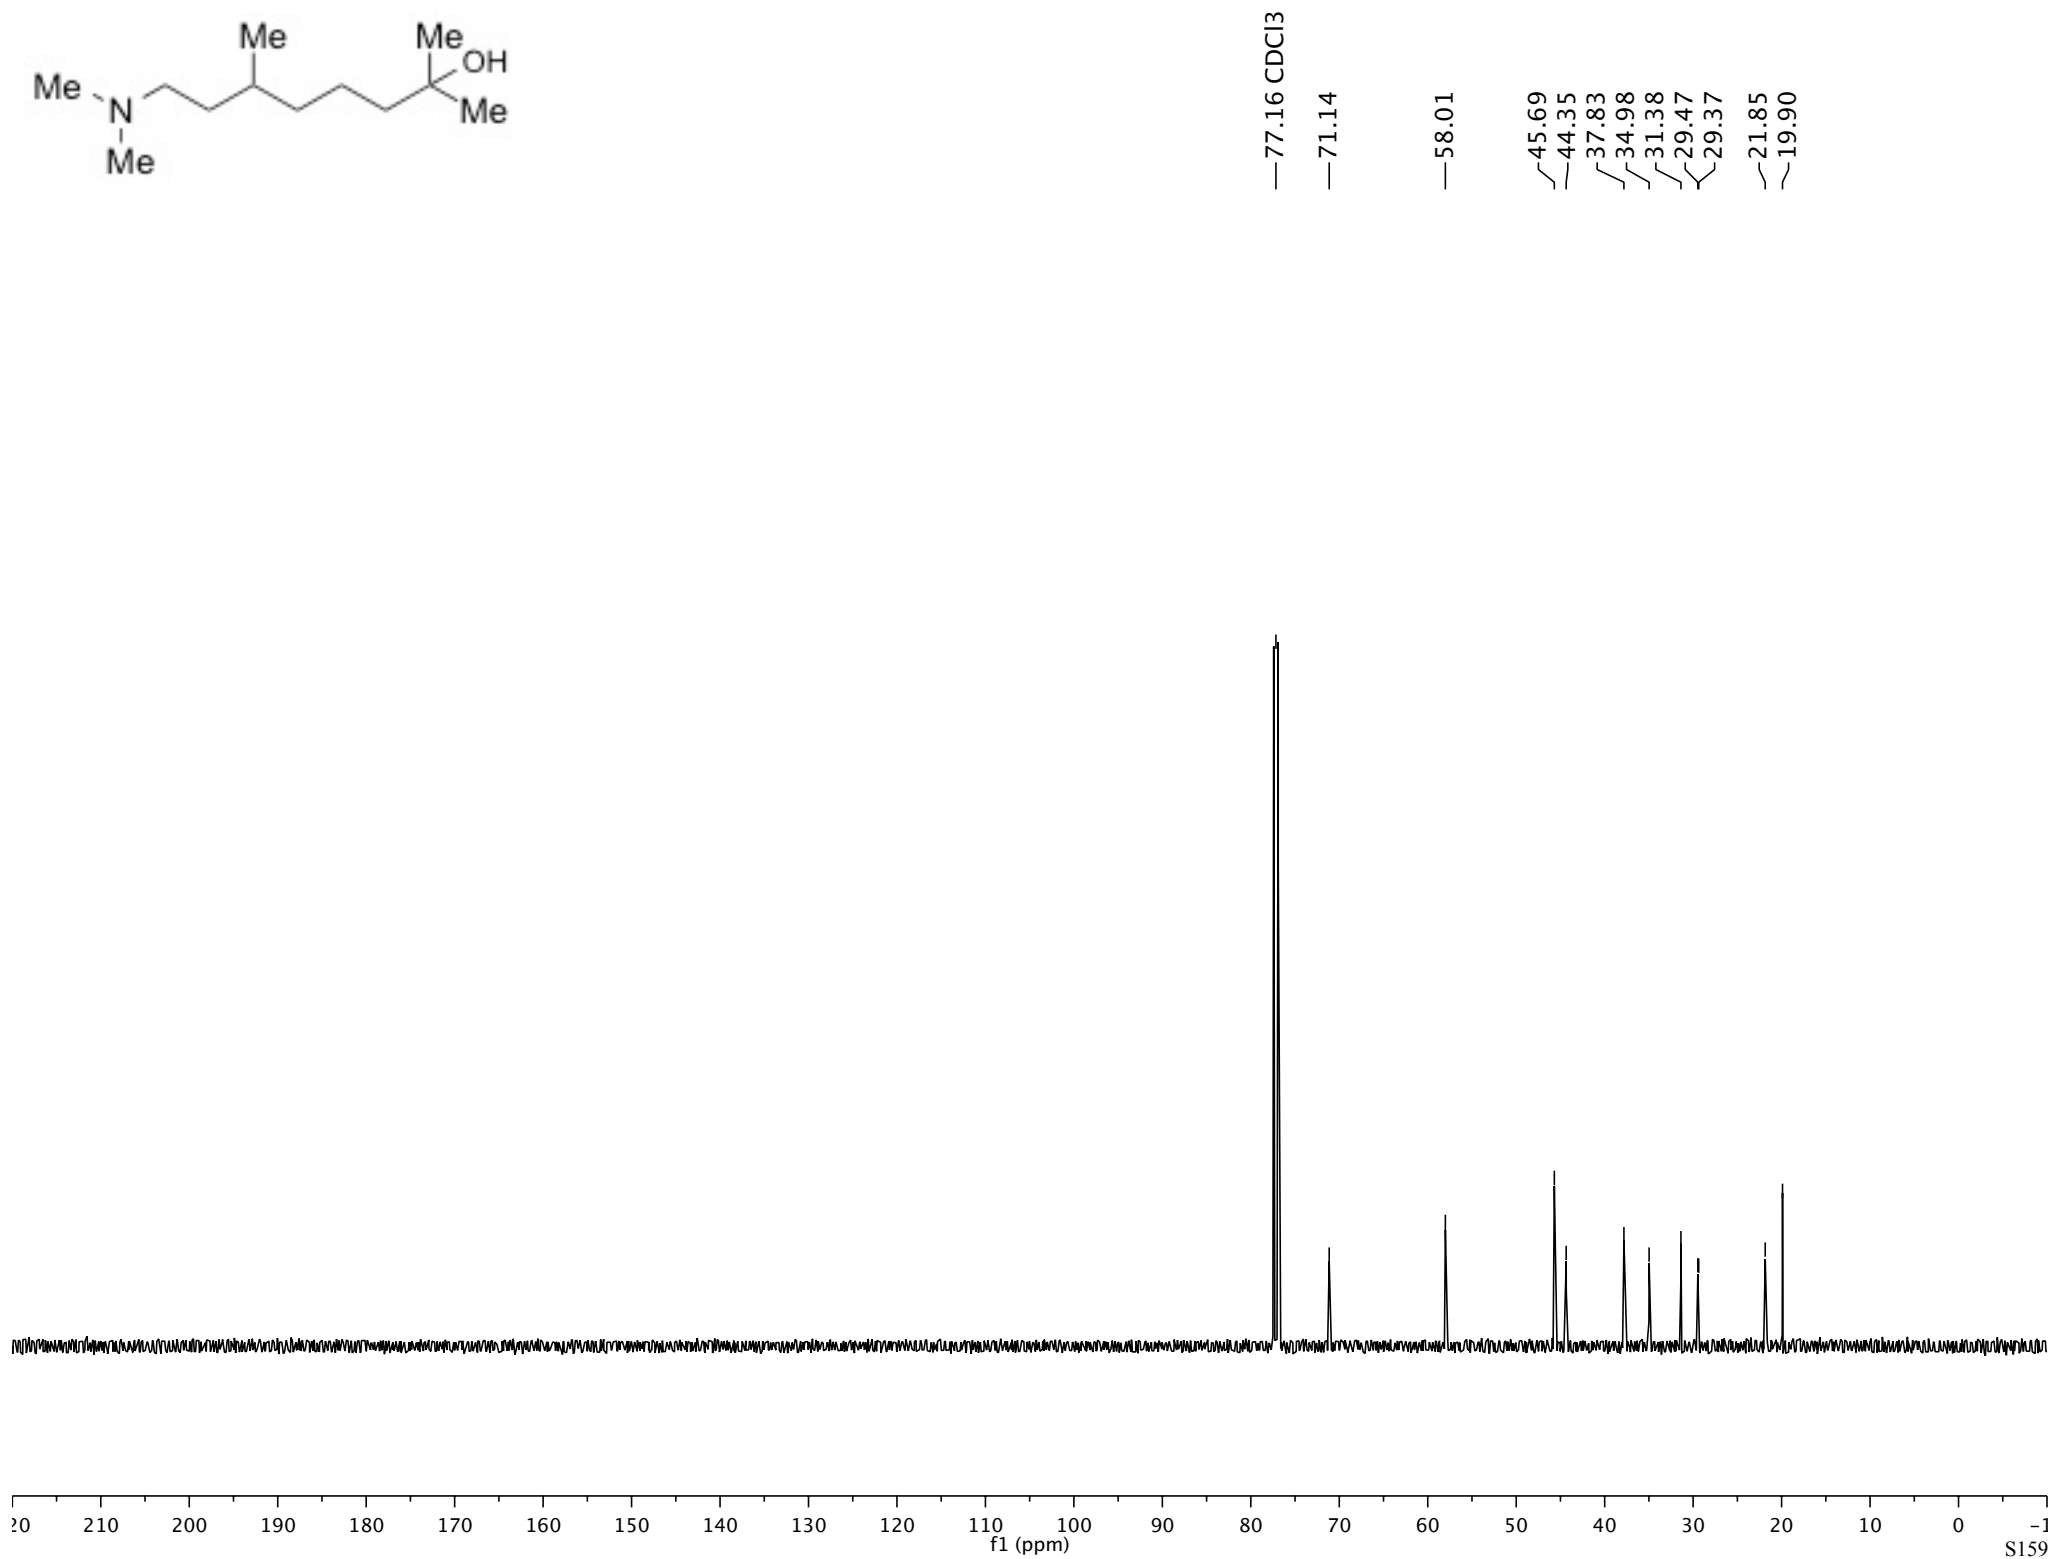



| Parameter              | Value   |
|------------------------|---------|
| Origin                 | Varian  |
| Spectrometer           | inova   |
| Solvent                | CDCl3   |
| Temperature            | 20.0    |
| Pulse Sequence         | s2pul   |
| Experiment             | 1D      |
| Probe                  | hcn     |
| Receiver Gain          | 26      |
| Relaxation Delay       | 0.0000  |
| Pulse Width            | 0.0000  |
| Acquisition Time       | 4.0960  |
| Spectrometer Frequency | 500.07  |
| Spectral Width         | 8000.0  |
| Lowest Frequency       | -1520.9 |
| Nucleus                | 1H      |
| Acquired Size          | 32768   |
| Spectral Size          | 65536   |

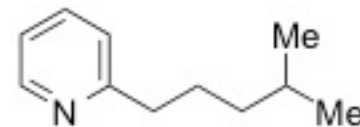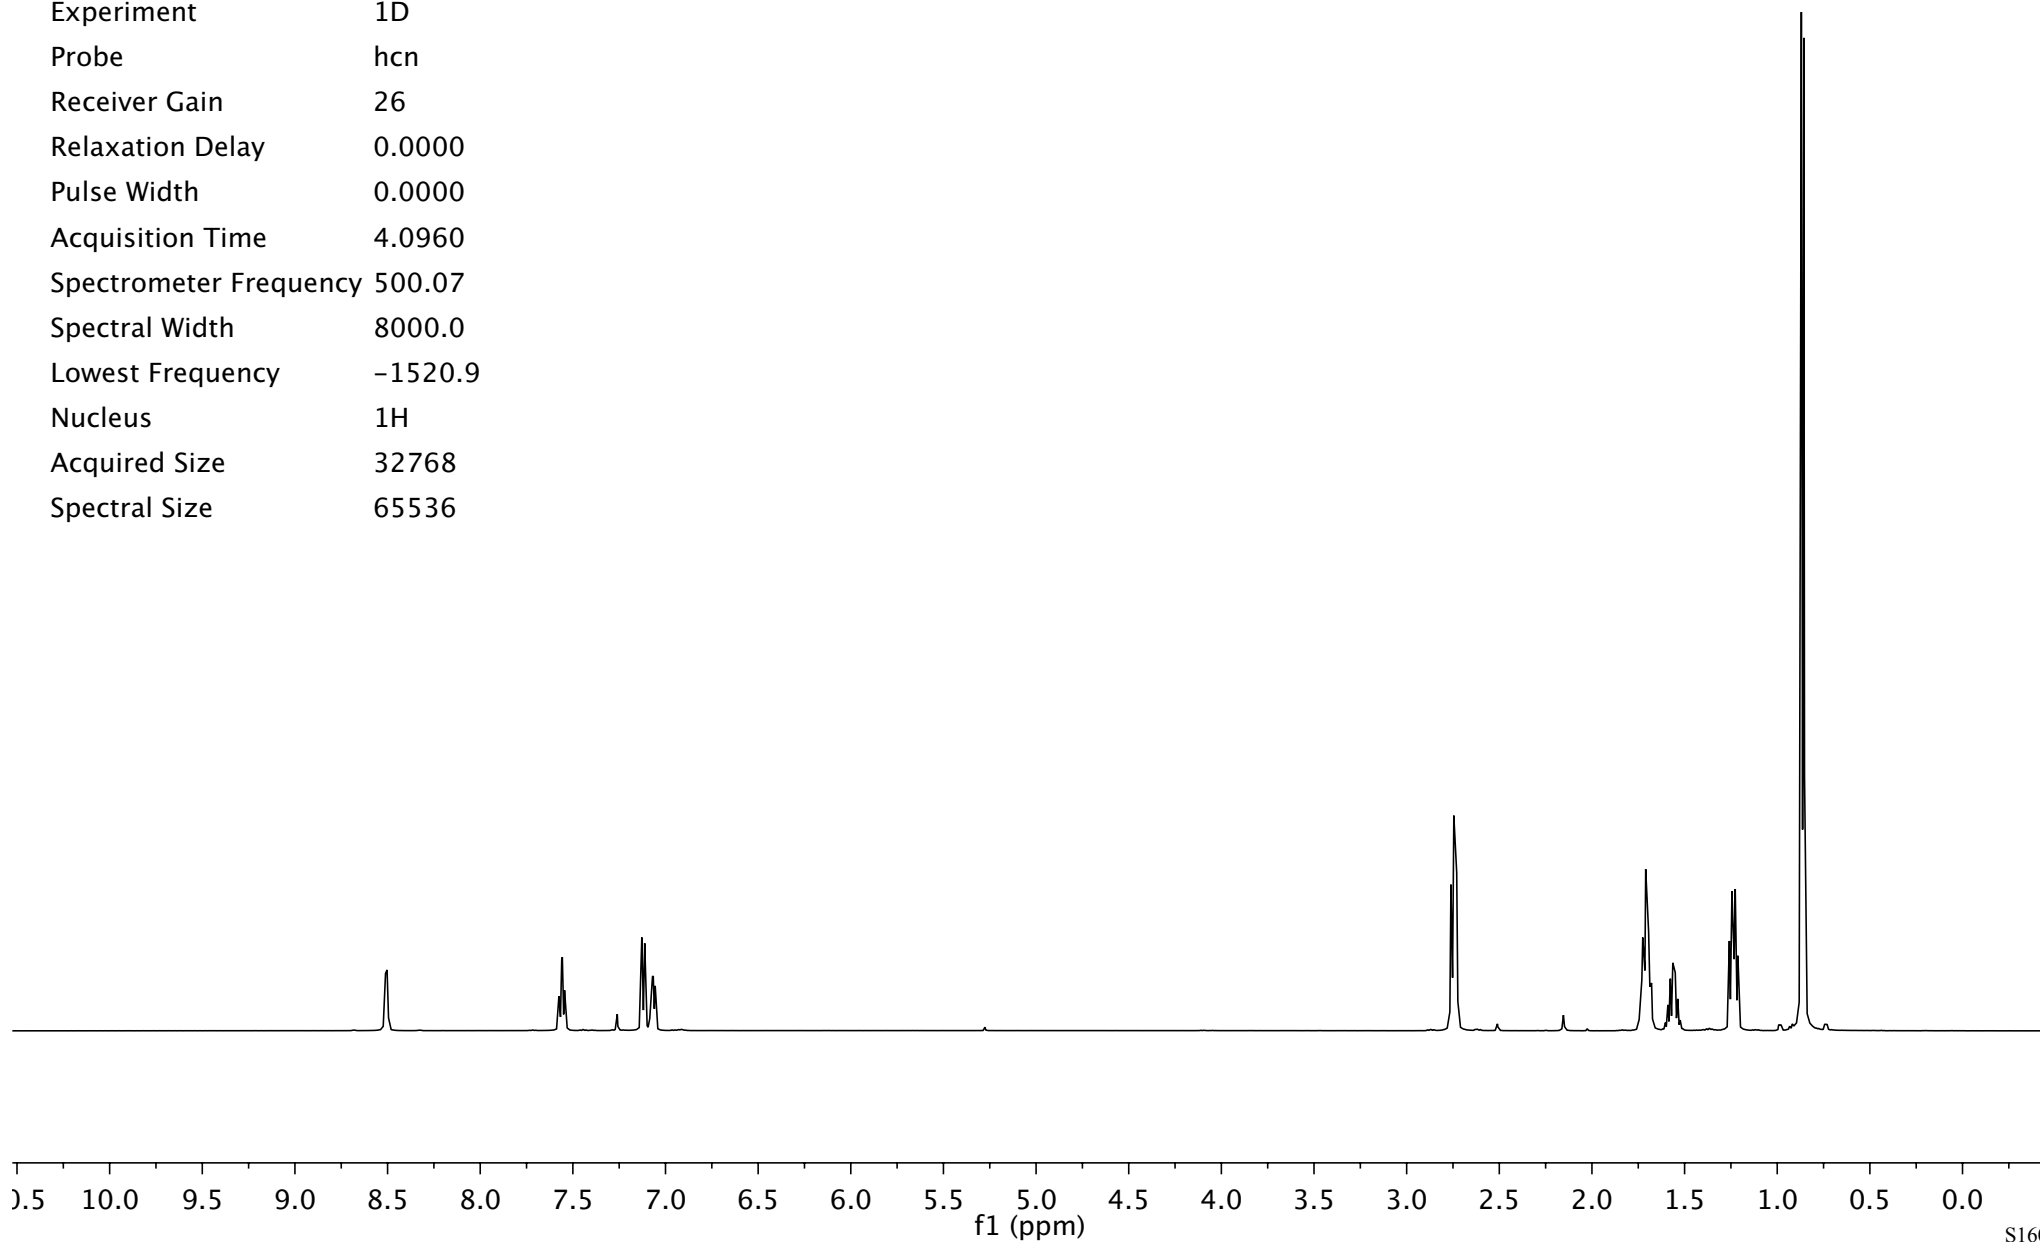

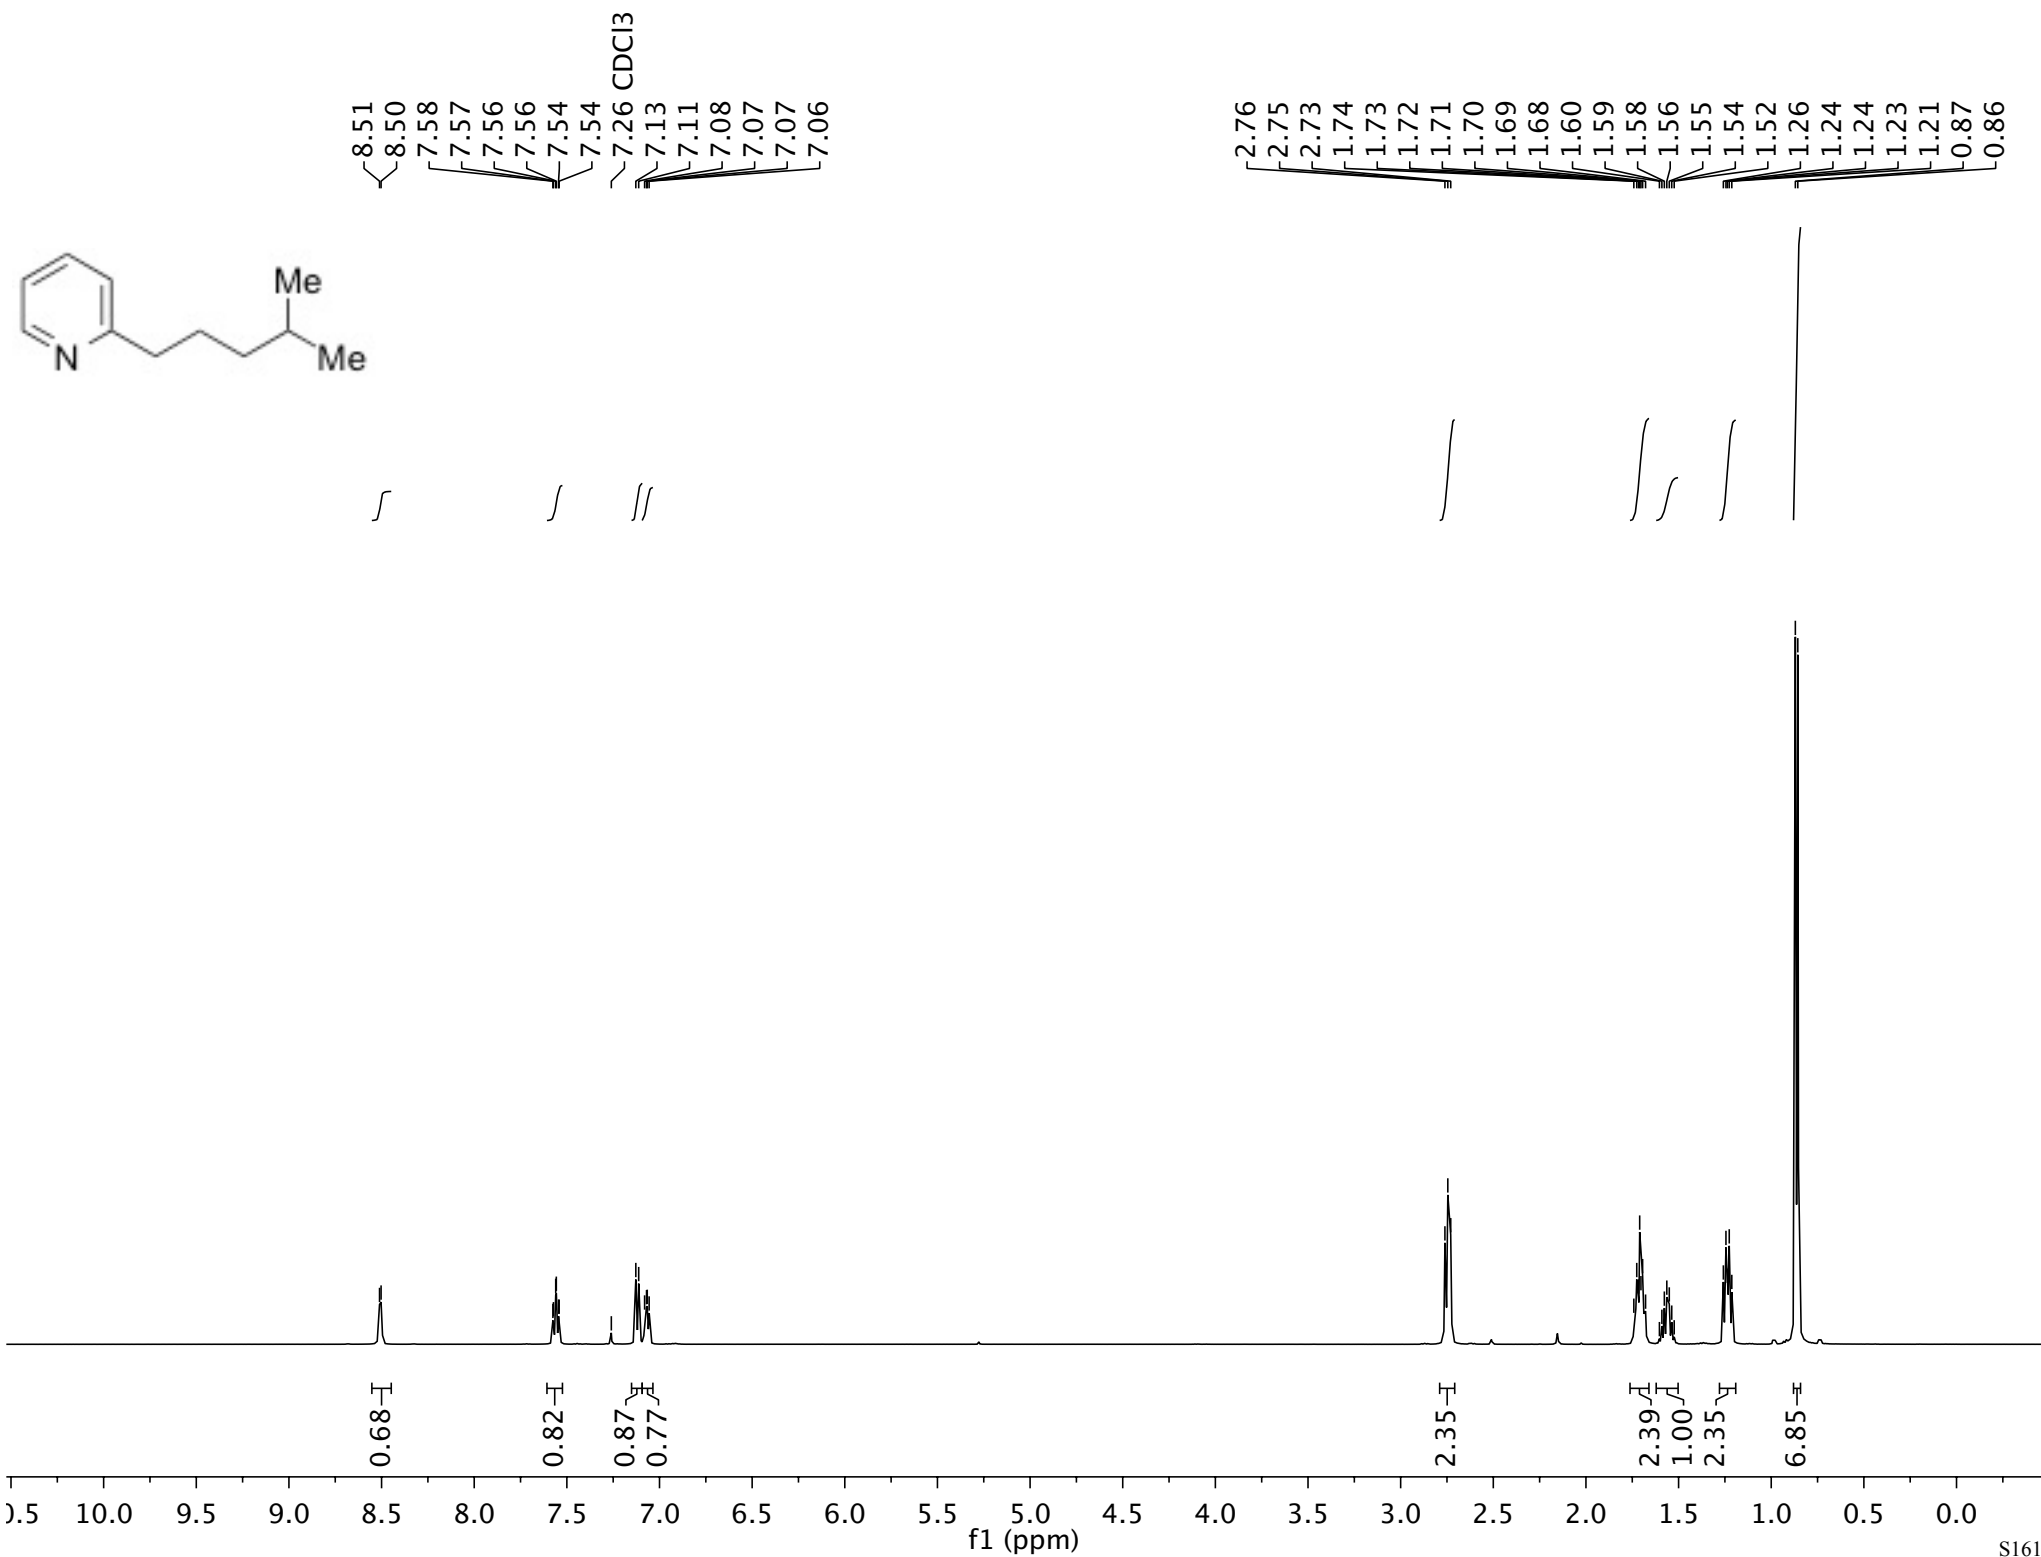

| Parameter              | Value   |
|------------------------|---------|
| Origin                 | Varian  |
| Spectrometer           | inova   |
| Solvent                | CDCl3   |
| Temperature            | 20.0    |
| Pulse Sequence         | s2pul   |
| Experiment             | 1D      |
| Probe                  | QUADG   |
| Receiver Gain          | 60      |
| Relaxation Delay       | 1.0000  |
| Pulse Width            | 0.0000  |
| Acquisition Time       | 1.0240  |
| Spectrometer Frequency | 125.60  |
| Spectral Width         | 32000.0 |
| Lowest Frequency       | -2204.6 |
| Nucleus                | 13C     |
| Acquired Size          | 32768   |
| Spectral Size          | 65536   |

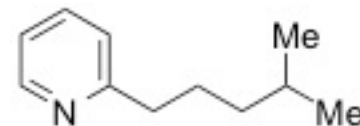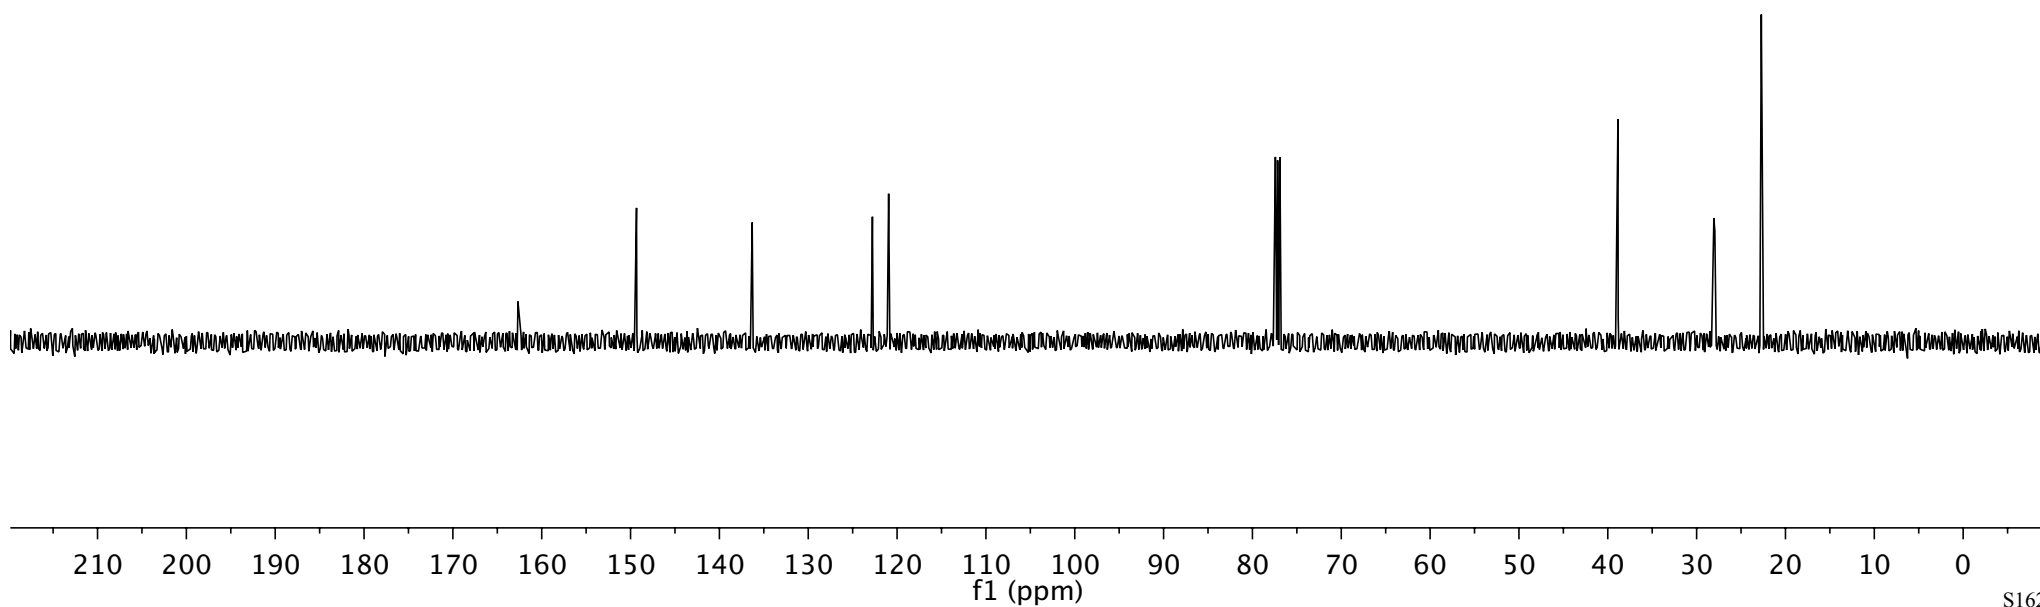

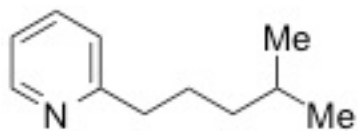

—162.68

—149.33

—136.31

~122.77

~120.95

{77.42 CDCI3

{77.16 CDCI3

{76.91 CDCI3

—38.86

~28.06

~27.95

~22.72

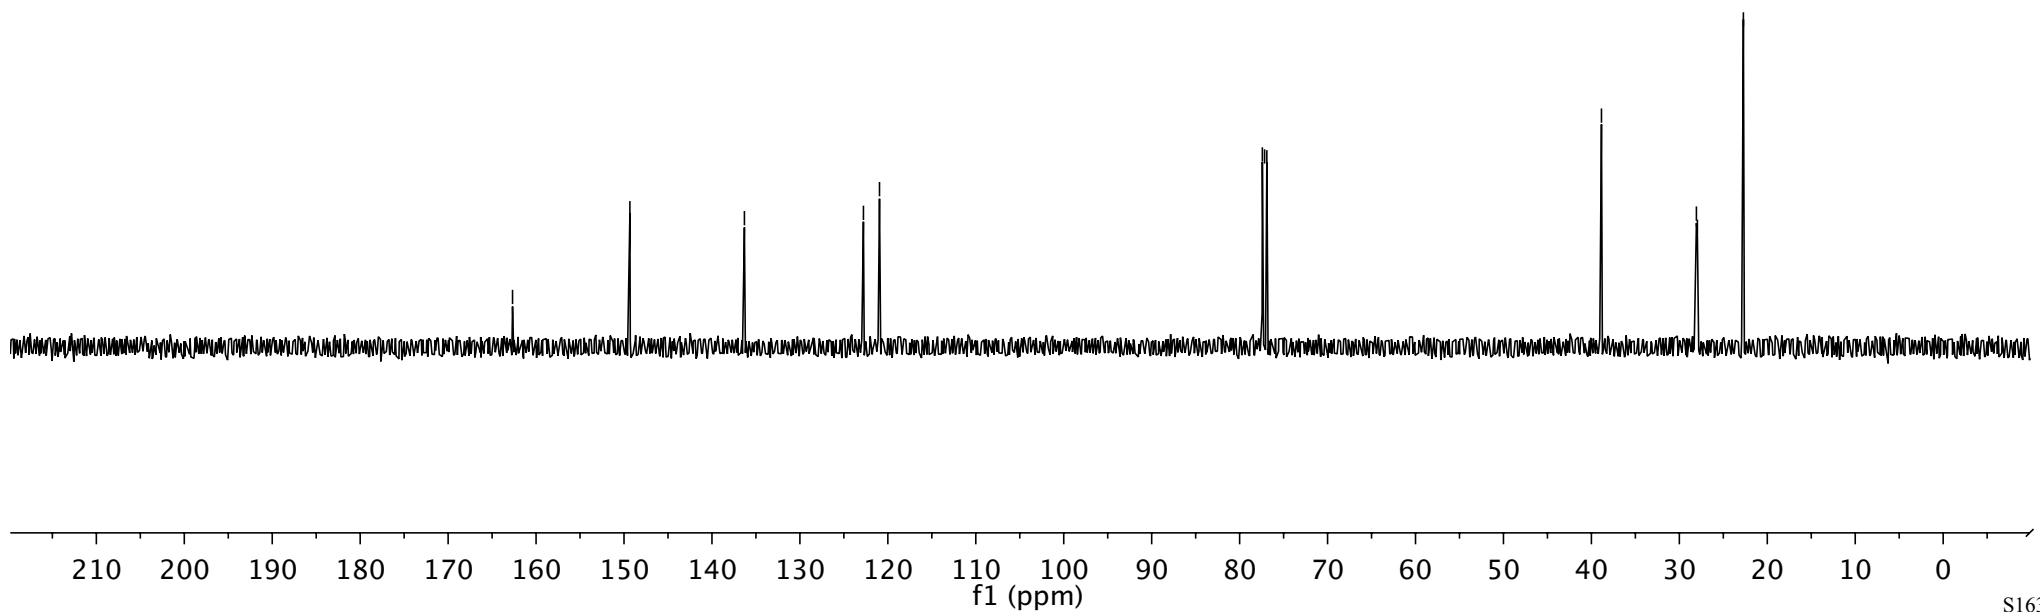

| Parameter              | Value   |
|------------------------|---------|
| Origin                 | Varian  |
| Spectrometer           | inova   |
| Solvent                | CDCl3   |
| Temperature            | 20.0    |
| Pulse Sequence         | s2pul   |
| Experiment             | 1D      |
| Probe                  | quad94  |
| Receiver Gain          | 54      |
| Relaxation Delay       | 0.0000  |
| Pulse Width            | 0.0000  |
| Acquisition Time       | 4.0960  |
| Spectrometer Frequency | 399.95  |
| Spectral Width         | 8000.0  |
| Lowest Frequency       | -2424.5 |
| Nucleus                | 1H      |
| Acquired Size          | 32768   |
| Spectral Size          | 65536   |

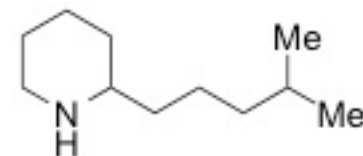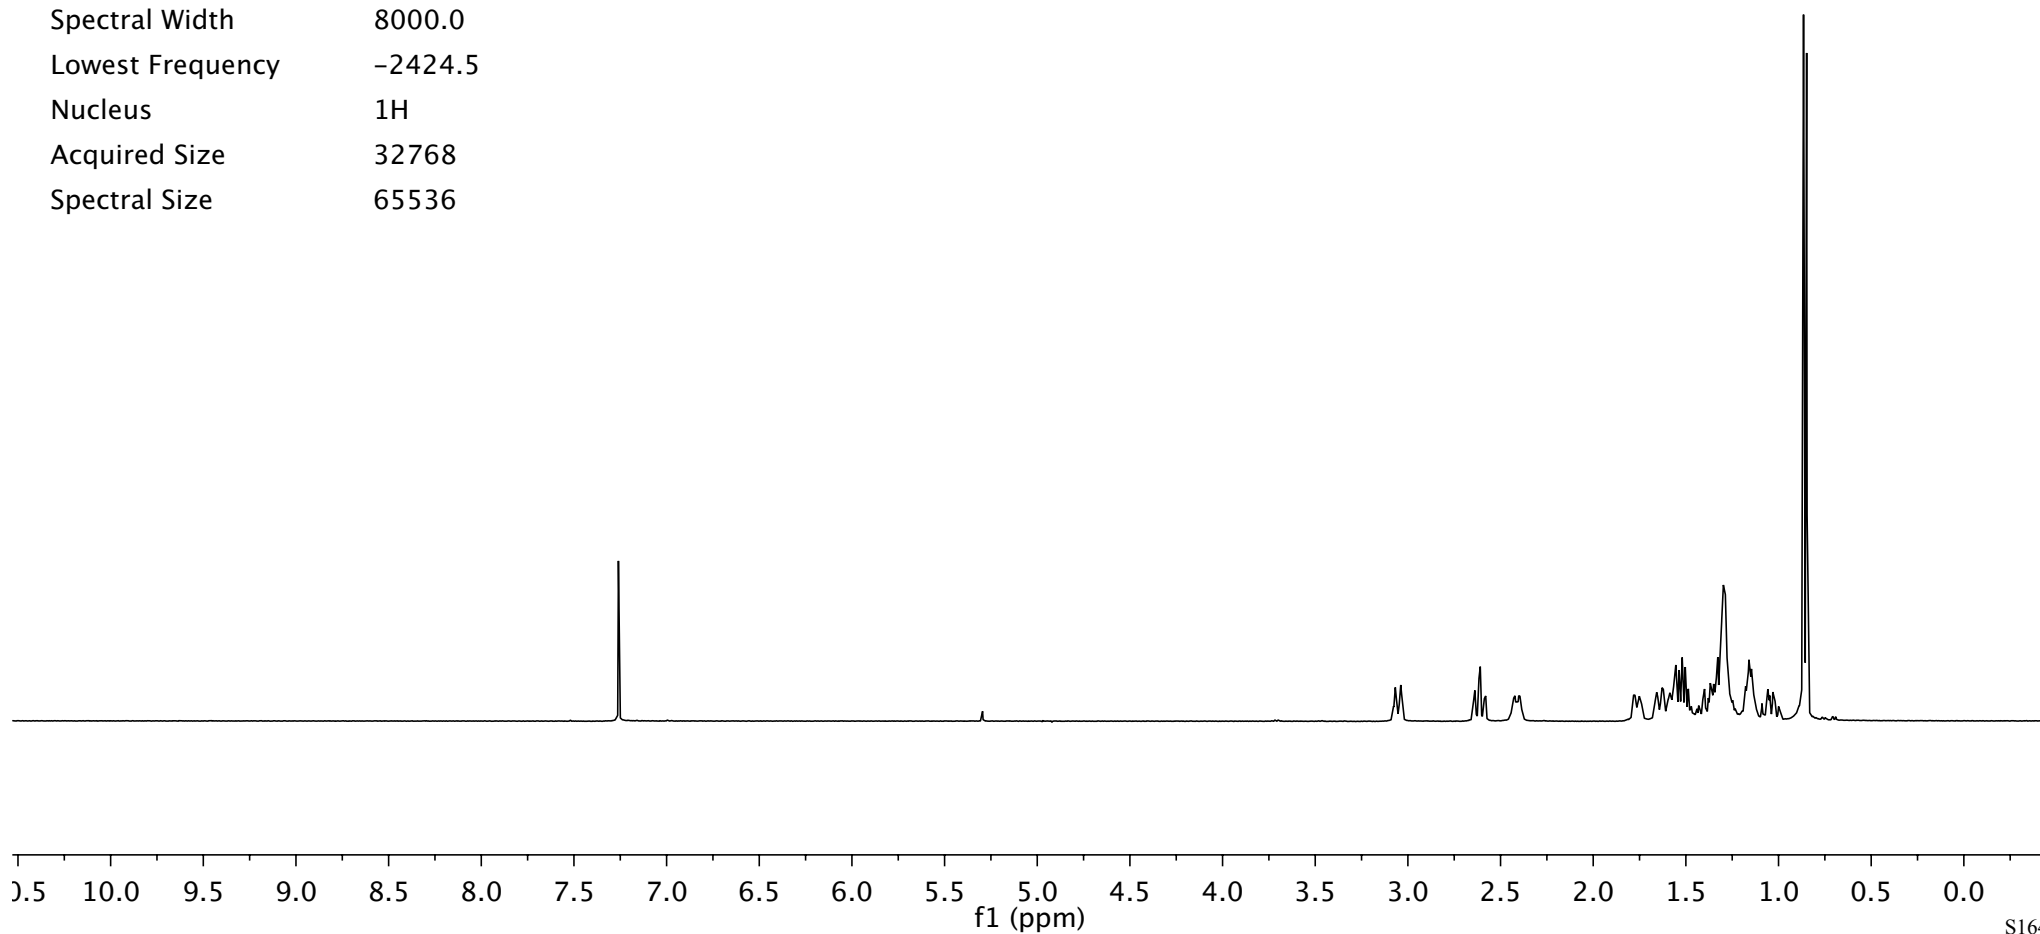

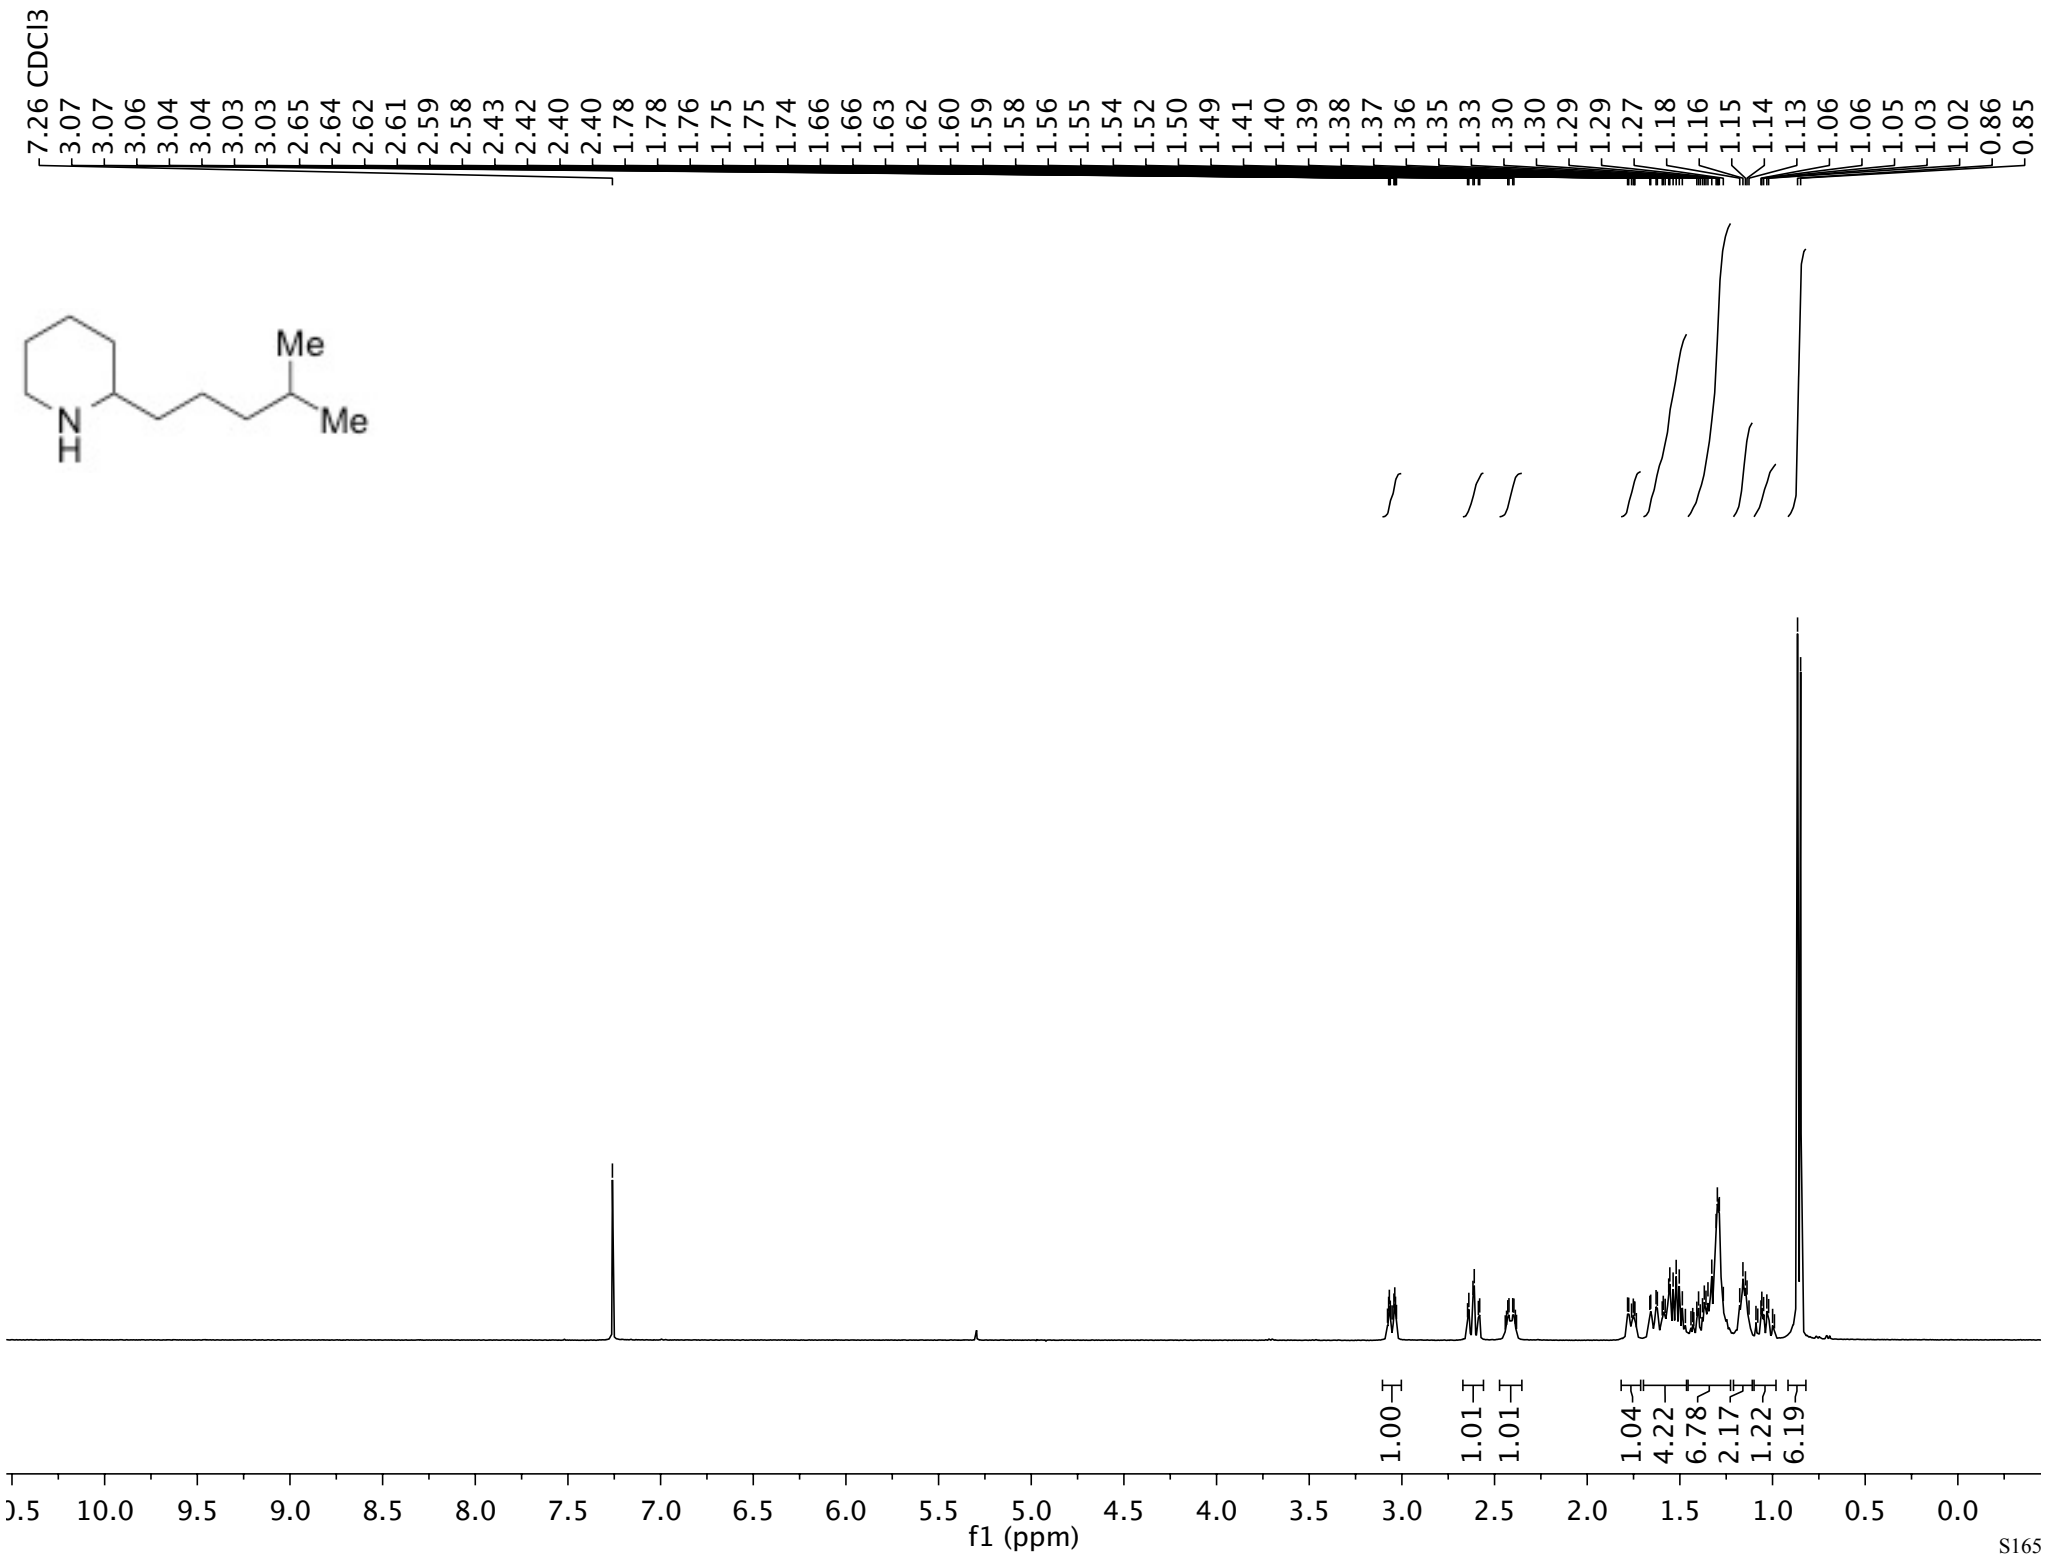

| Parameter              | Value           |
|------------------------|-----------------|
| Origin                 | Varian          |
| Spectrometer           | inova           |
| Solvent                | CDCl3           |
| Temperature            | 20.0            |
| Pulse Sequence         | s2pul           |
| Experiment             | 1D              |
| Probe                  | QUAD            |
| Receiver Gain          | 60              |
| Relaxation Delay       | 1.0000          |
| Pulse Width            | 0.0000          |
| Acquisition Time       | 1.0863          |
| Spectrometer Frequency | 125.66          |
| Spectral Width         | 30165.9         |
| Lowest Frequency       | -1272.5         |
| Nucleus                | <sup>13</sup> C |
| Acquired Size          | 32768           |
| Spectral Size          | 65536           |

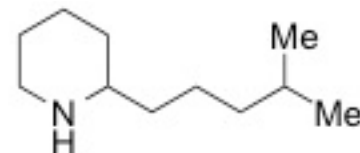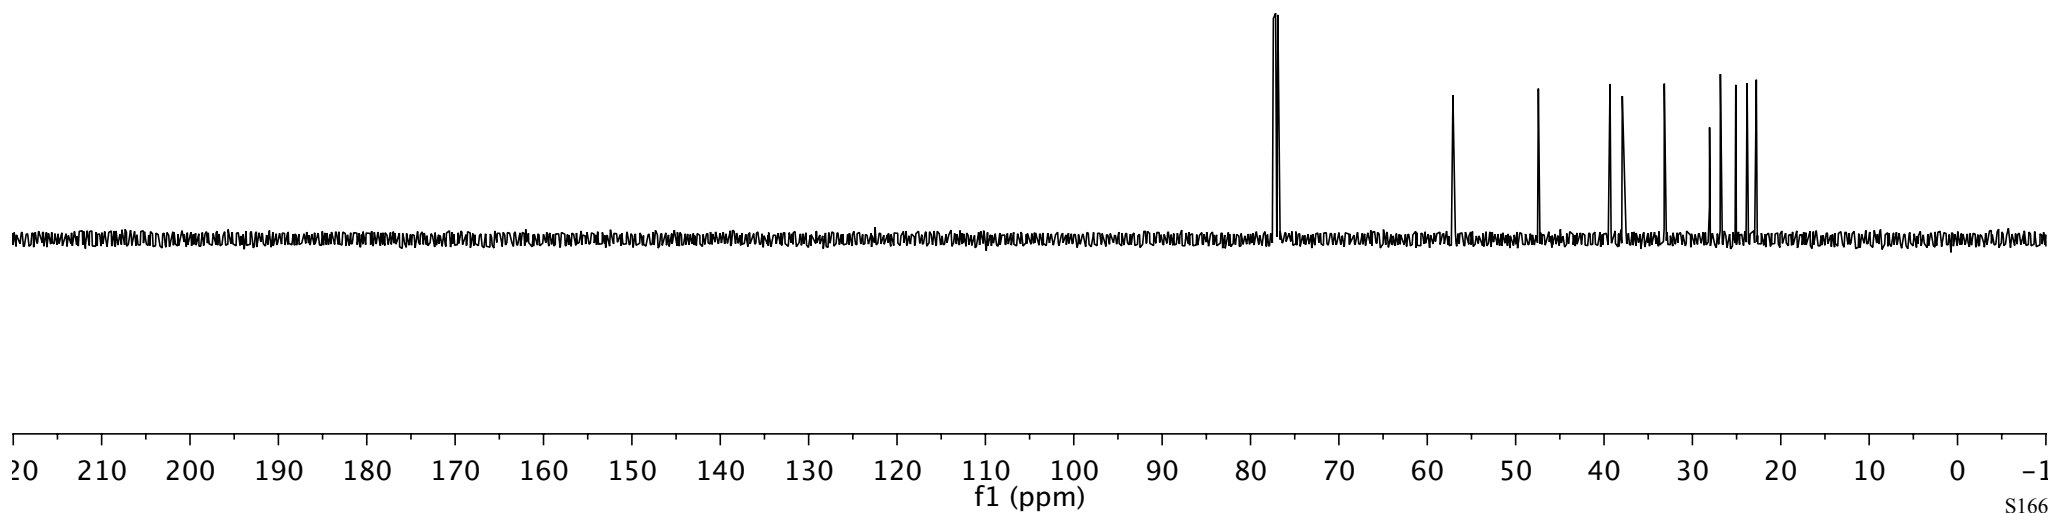

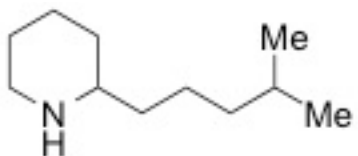

77.41 CDCl<sub>3</sub>  
 77.16 CDCl<sub>3</sub>  
 76.91 CDCl<sub>3</sub>

—57.10

—47.43

39.32

37.93

33.18

28.06

26.83

25.09

23.81

22.76

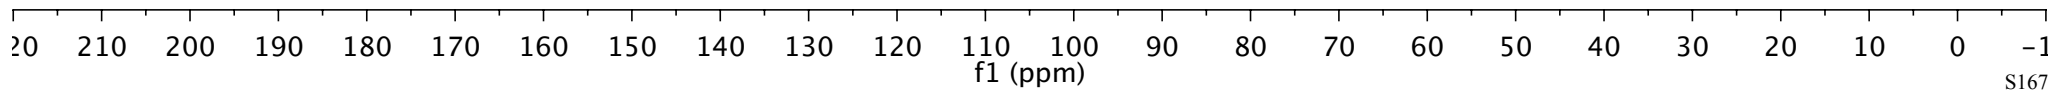



| Parameter              | Value          |
|------------------------|----------------|
| Origin                 | Varian         |
| Spectrometer           | inova          |
| Solvent                | CDCl3          |
| Temperature            | 20.0           |
| Pulse Sequence         | s2pul          |
| Experiment             | 1D             |
| Probe                  | hcn            |
| Number of Scans        | 16             |
| Receiver Gain          | 32             |
| Relaxation Delay       | 2.0000         |
| Pulse Width            | 0.0000         |
| Acquisition Time       | 4.0960         |
| Spectrometer Frequency | 500.07         |
| Spectral Width         | 8000.0         |
| Lowest Frequency       | -1521.1        |
| Nucleus                | <sup>1</sup> H |
| Acquired Size          | 32768          |
| Spectral Size          | 65536          |

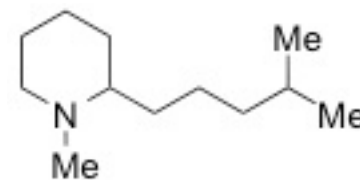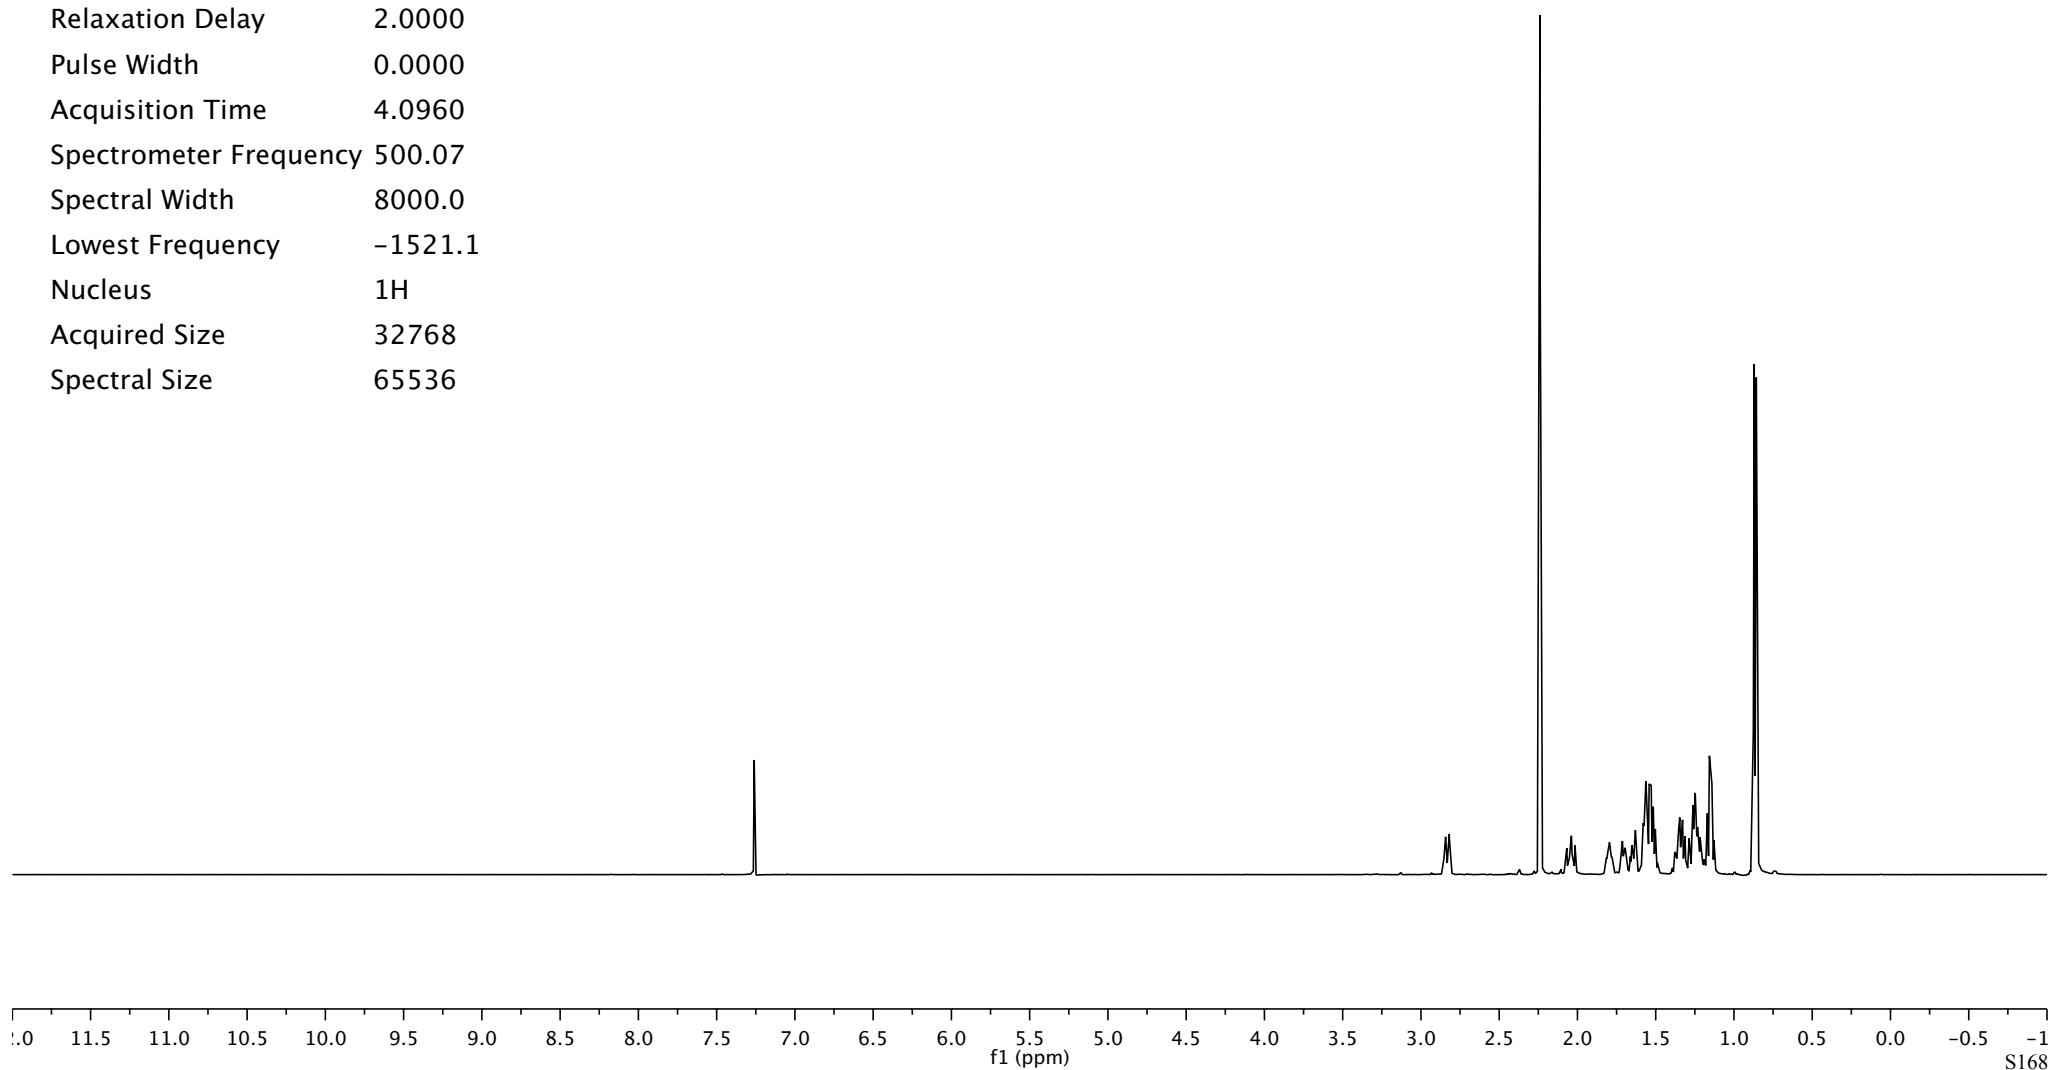

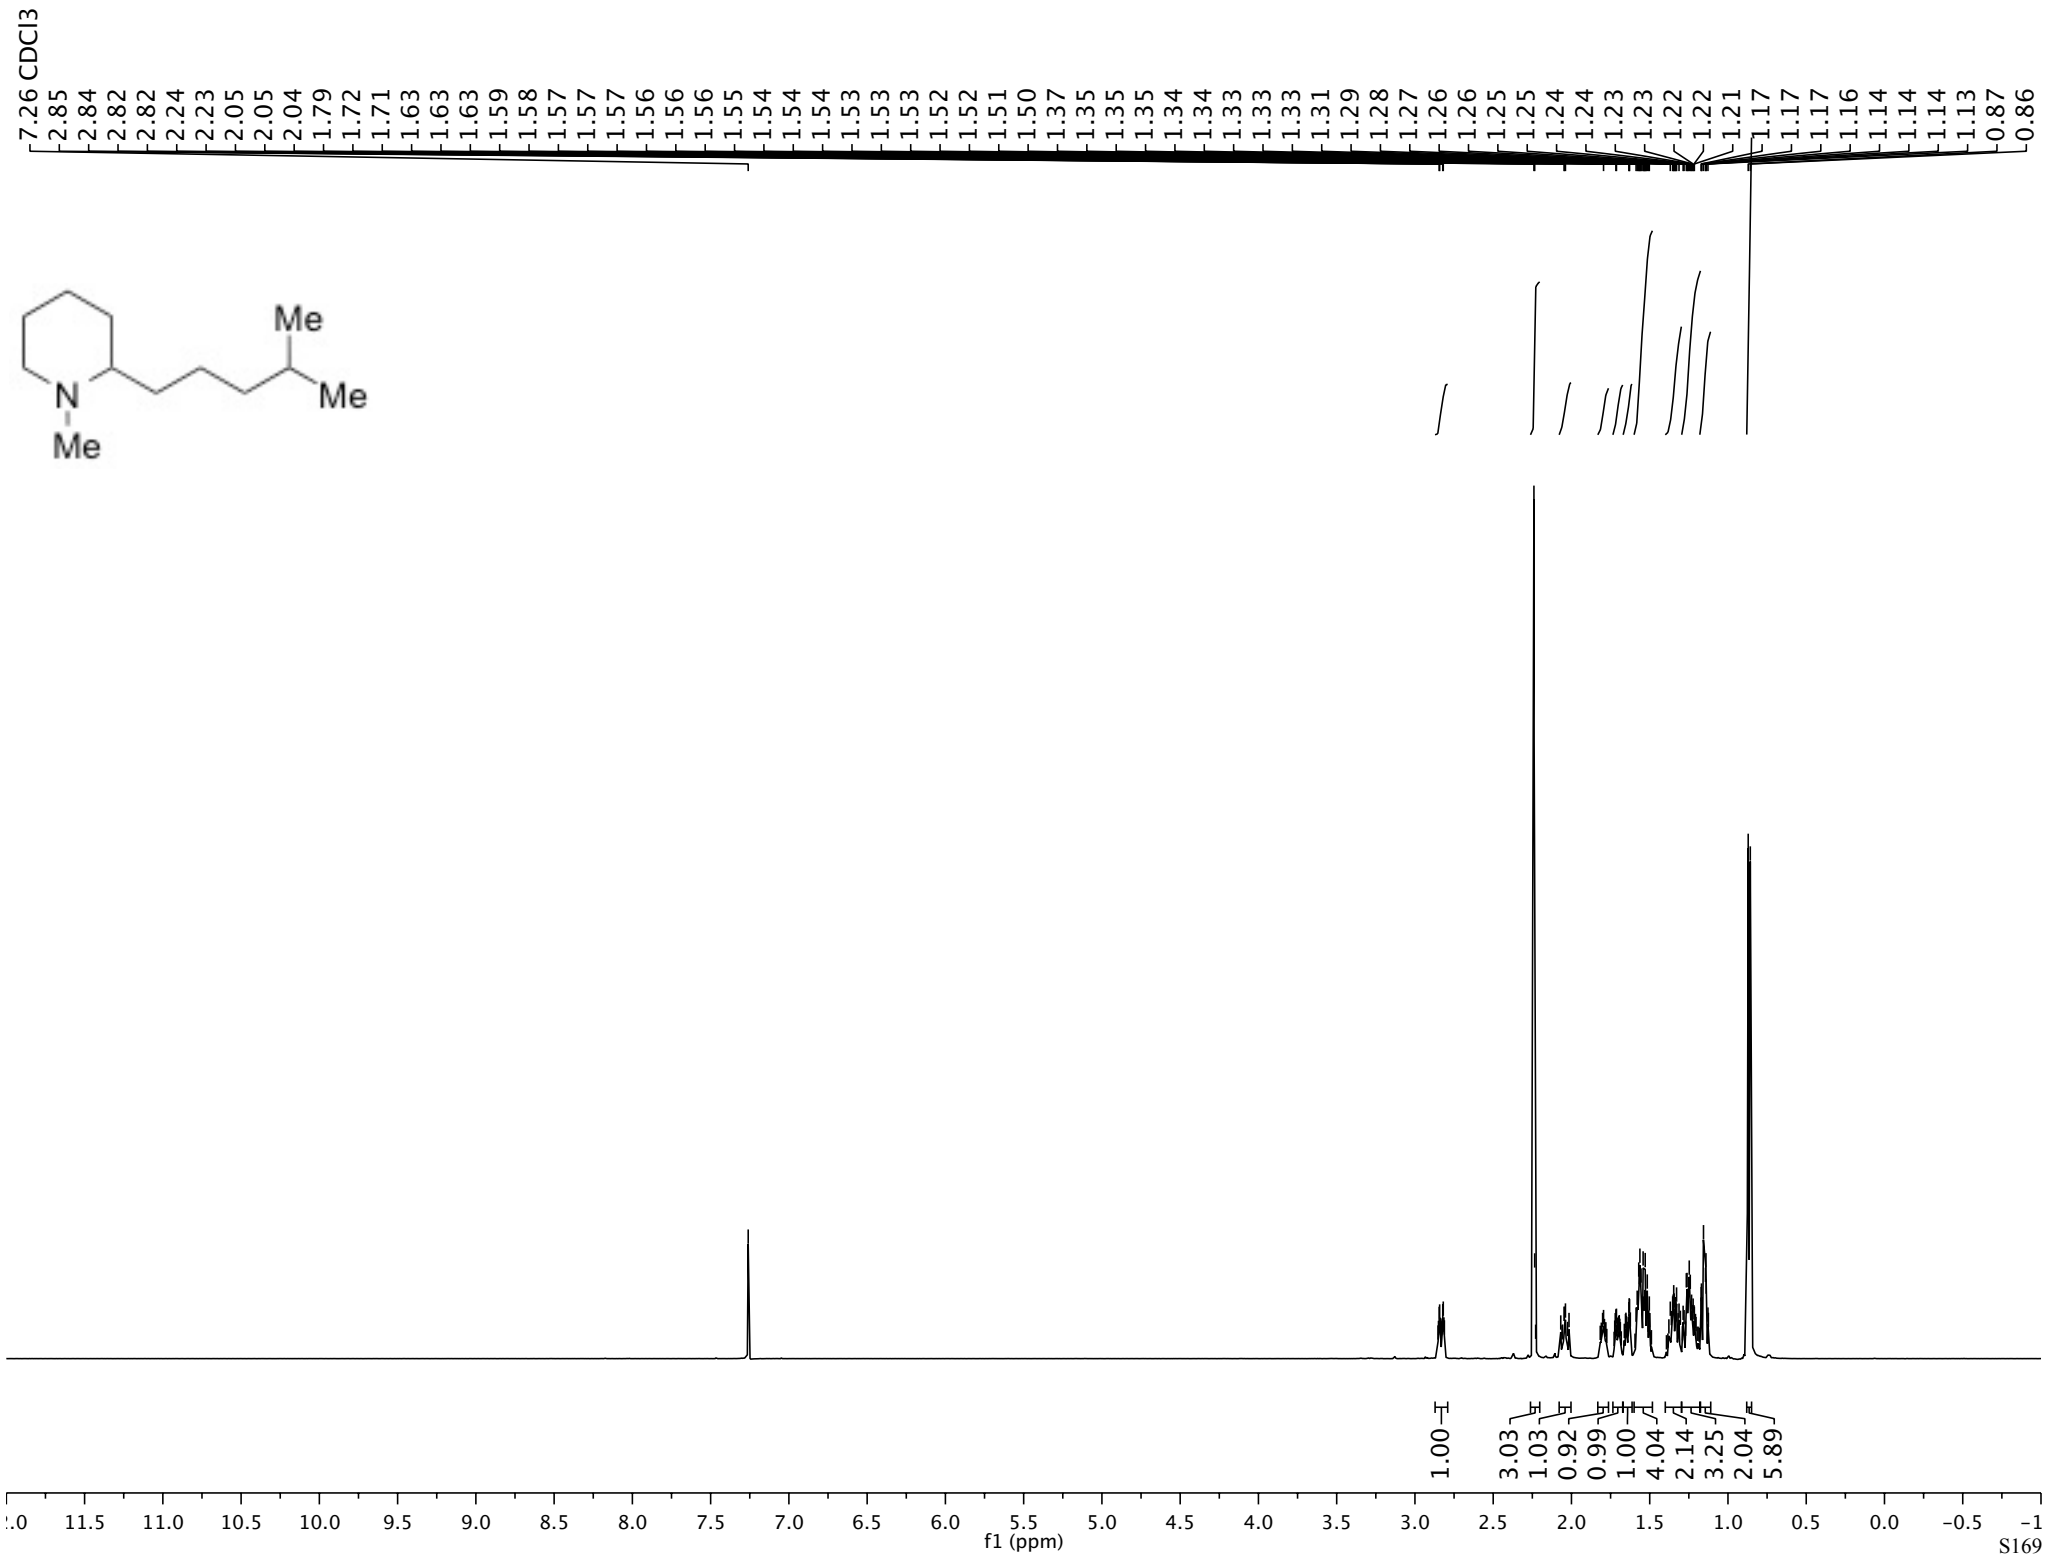

| Parameter              | Value   |
|------------------------|---------|
| Origin                 | Varian  |
| Spectrometer           | inova   |
| Solvent                | CDCl3   |
| Temperature            | 20.0    |
| Pulse Sequence         | s2pul   |
| Experiment             | 1D      |
| Probe                  | QUADG   |
| Number of Scans        | 704     |
| Receiver Gain          | 60      |
| Relaxation Delay       | 2.0000  |
| Pulse Width            | 0.0000  |
| Acquisition Time       | 1.0240  |
| Spectrometer Frequency | 125.60  |
| Spectral Width         | 32000.0 |
| Lowest Frequency       | -2199.8 |
| Nucleus                | 13C     |
| Acquired Size          | 32768   |
| Spectral Size          | 65536   |

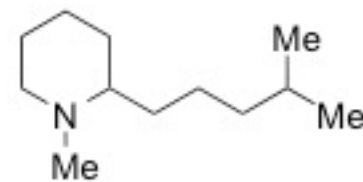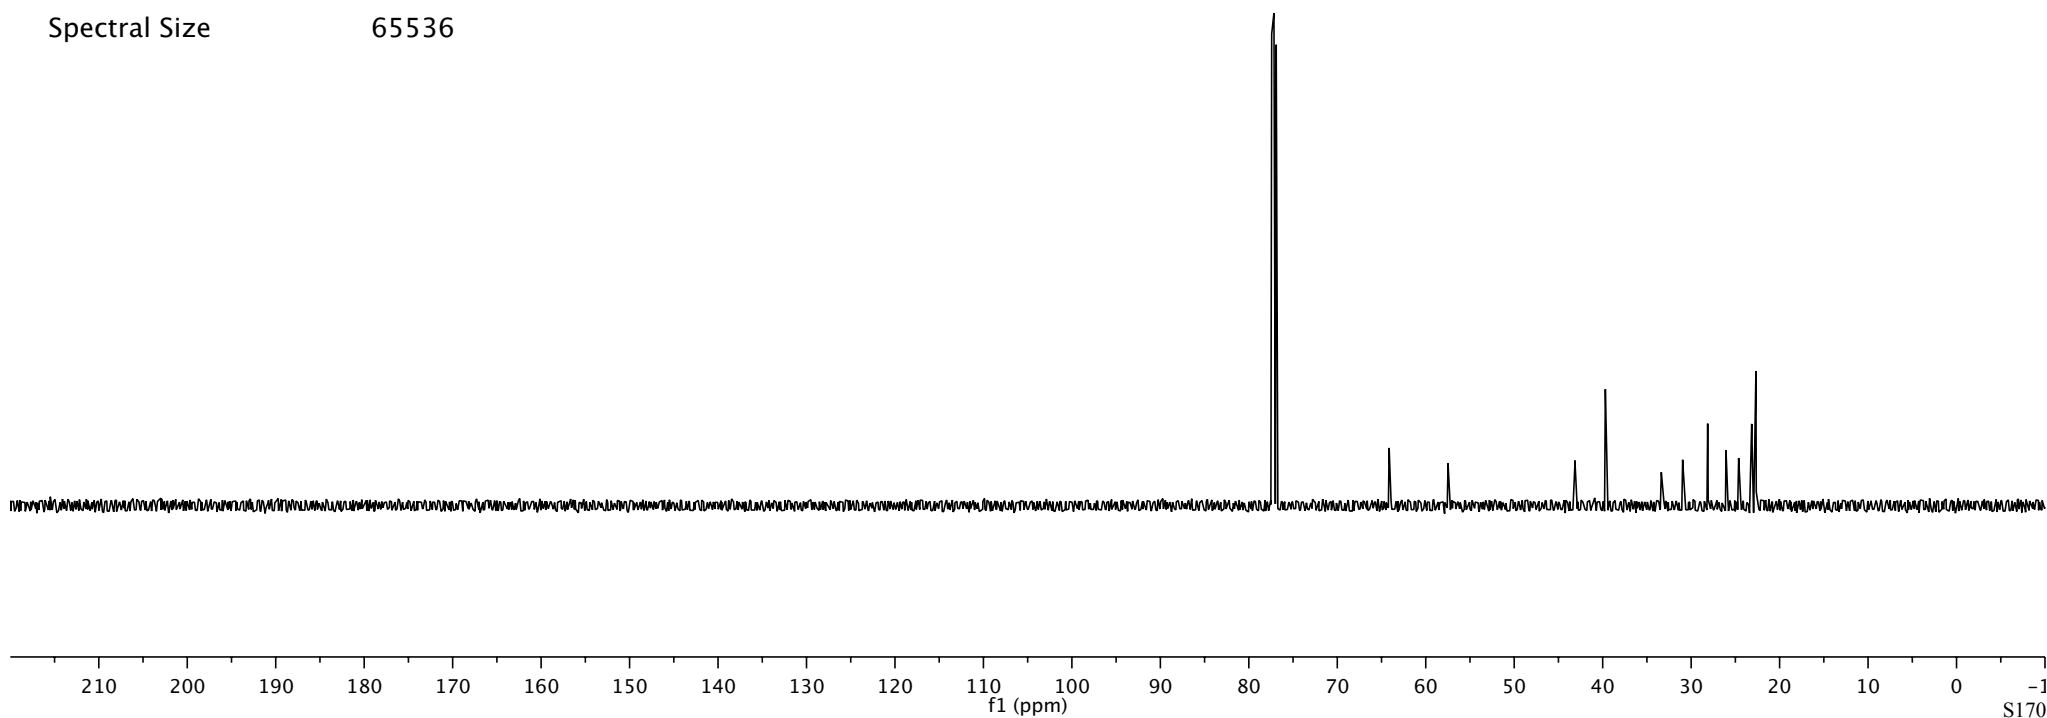

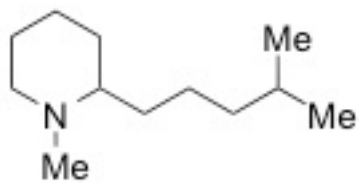

—77.16 CDCl<sub>3</sub>

—64.14

—57.48

43.14

39.69

33.37

30.96

28.13

26.06

24.63

23.15

22.91

22.68

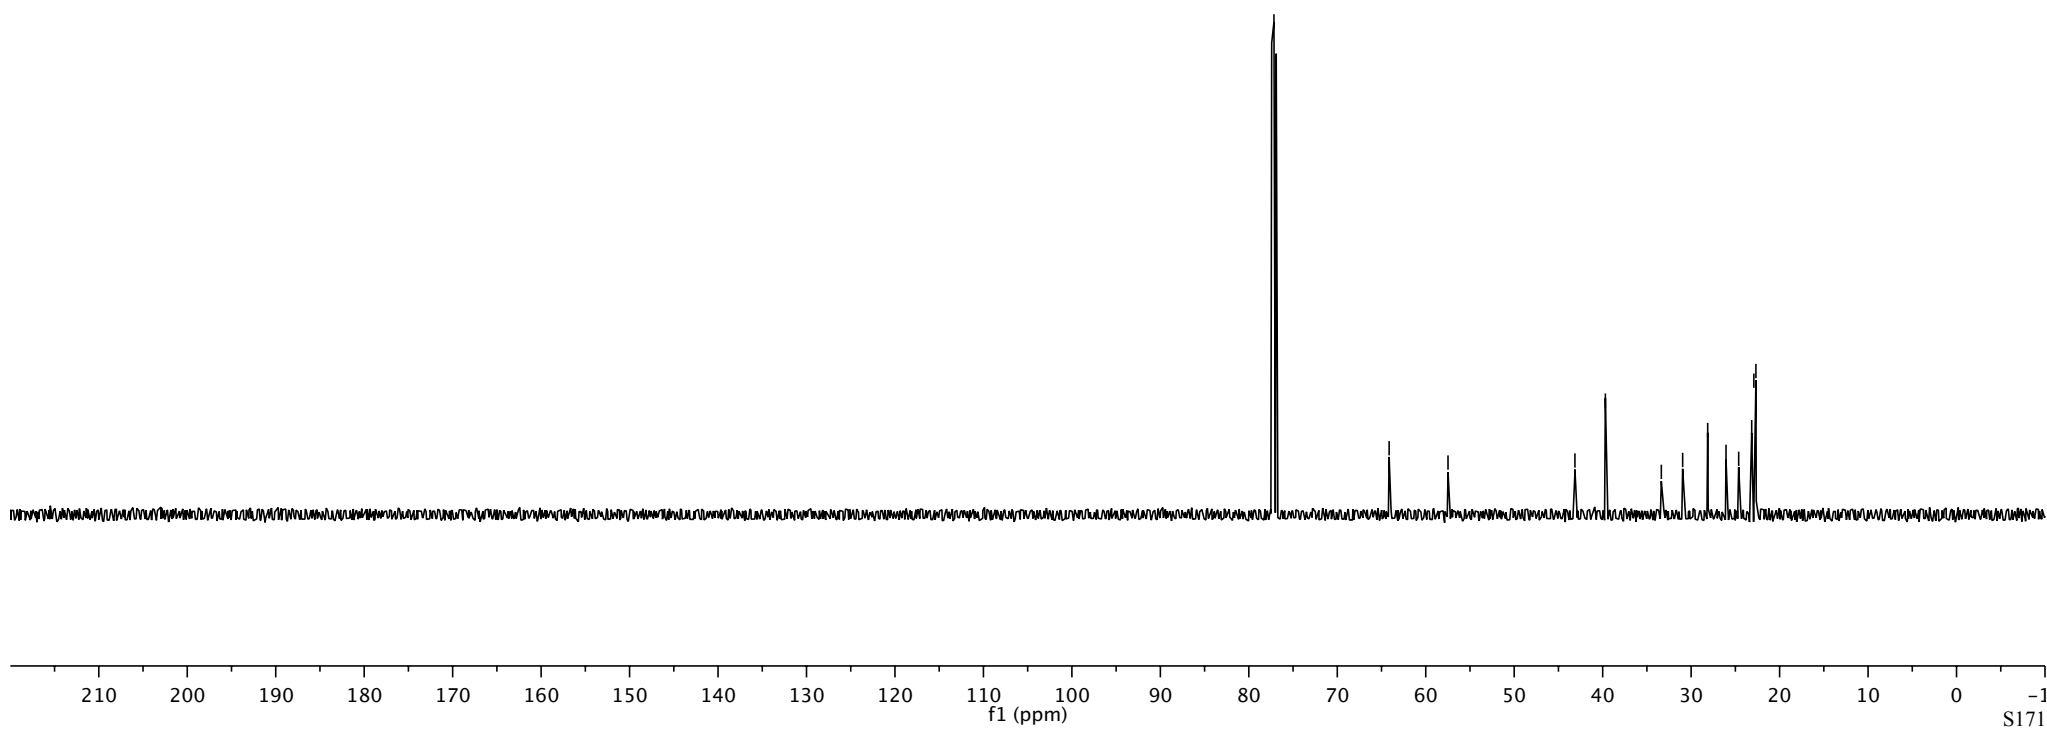

— 7.26 CDCl<sub>3</sub>

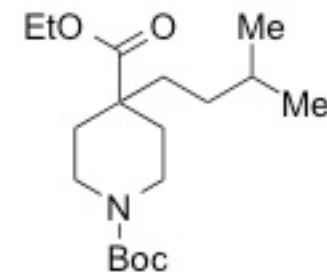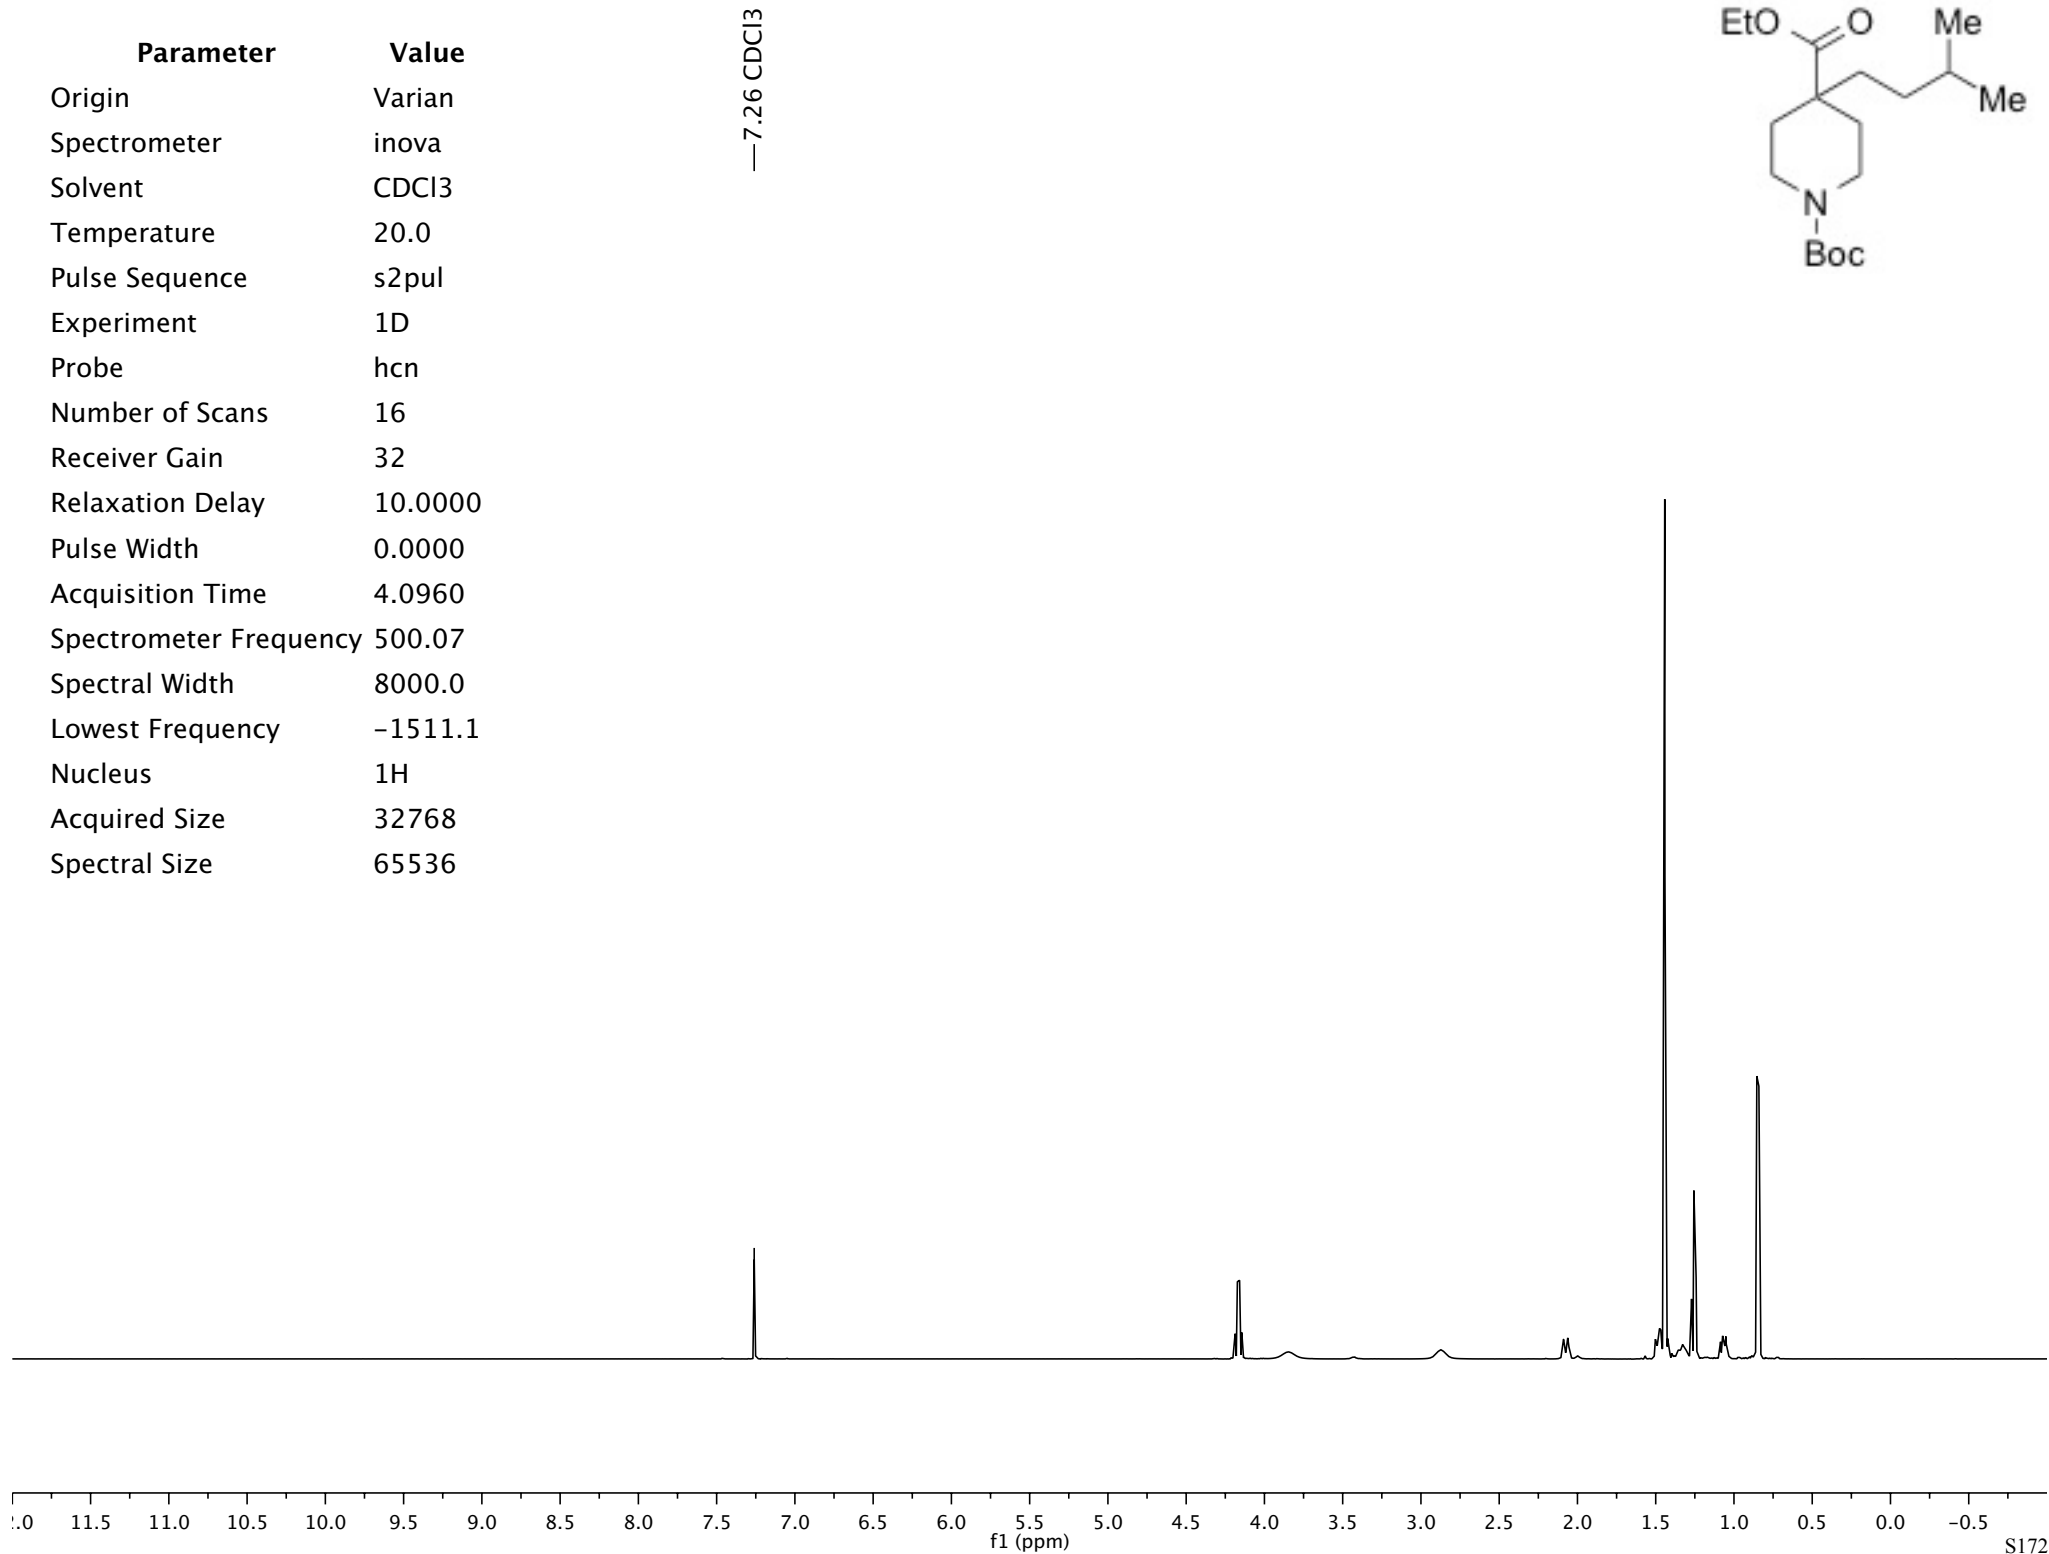

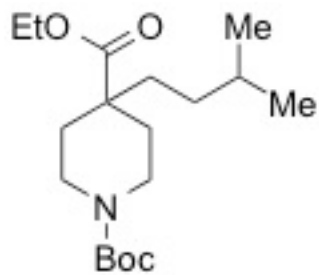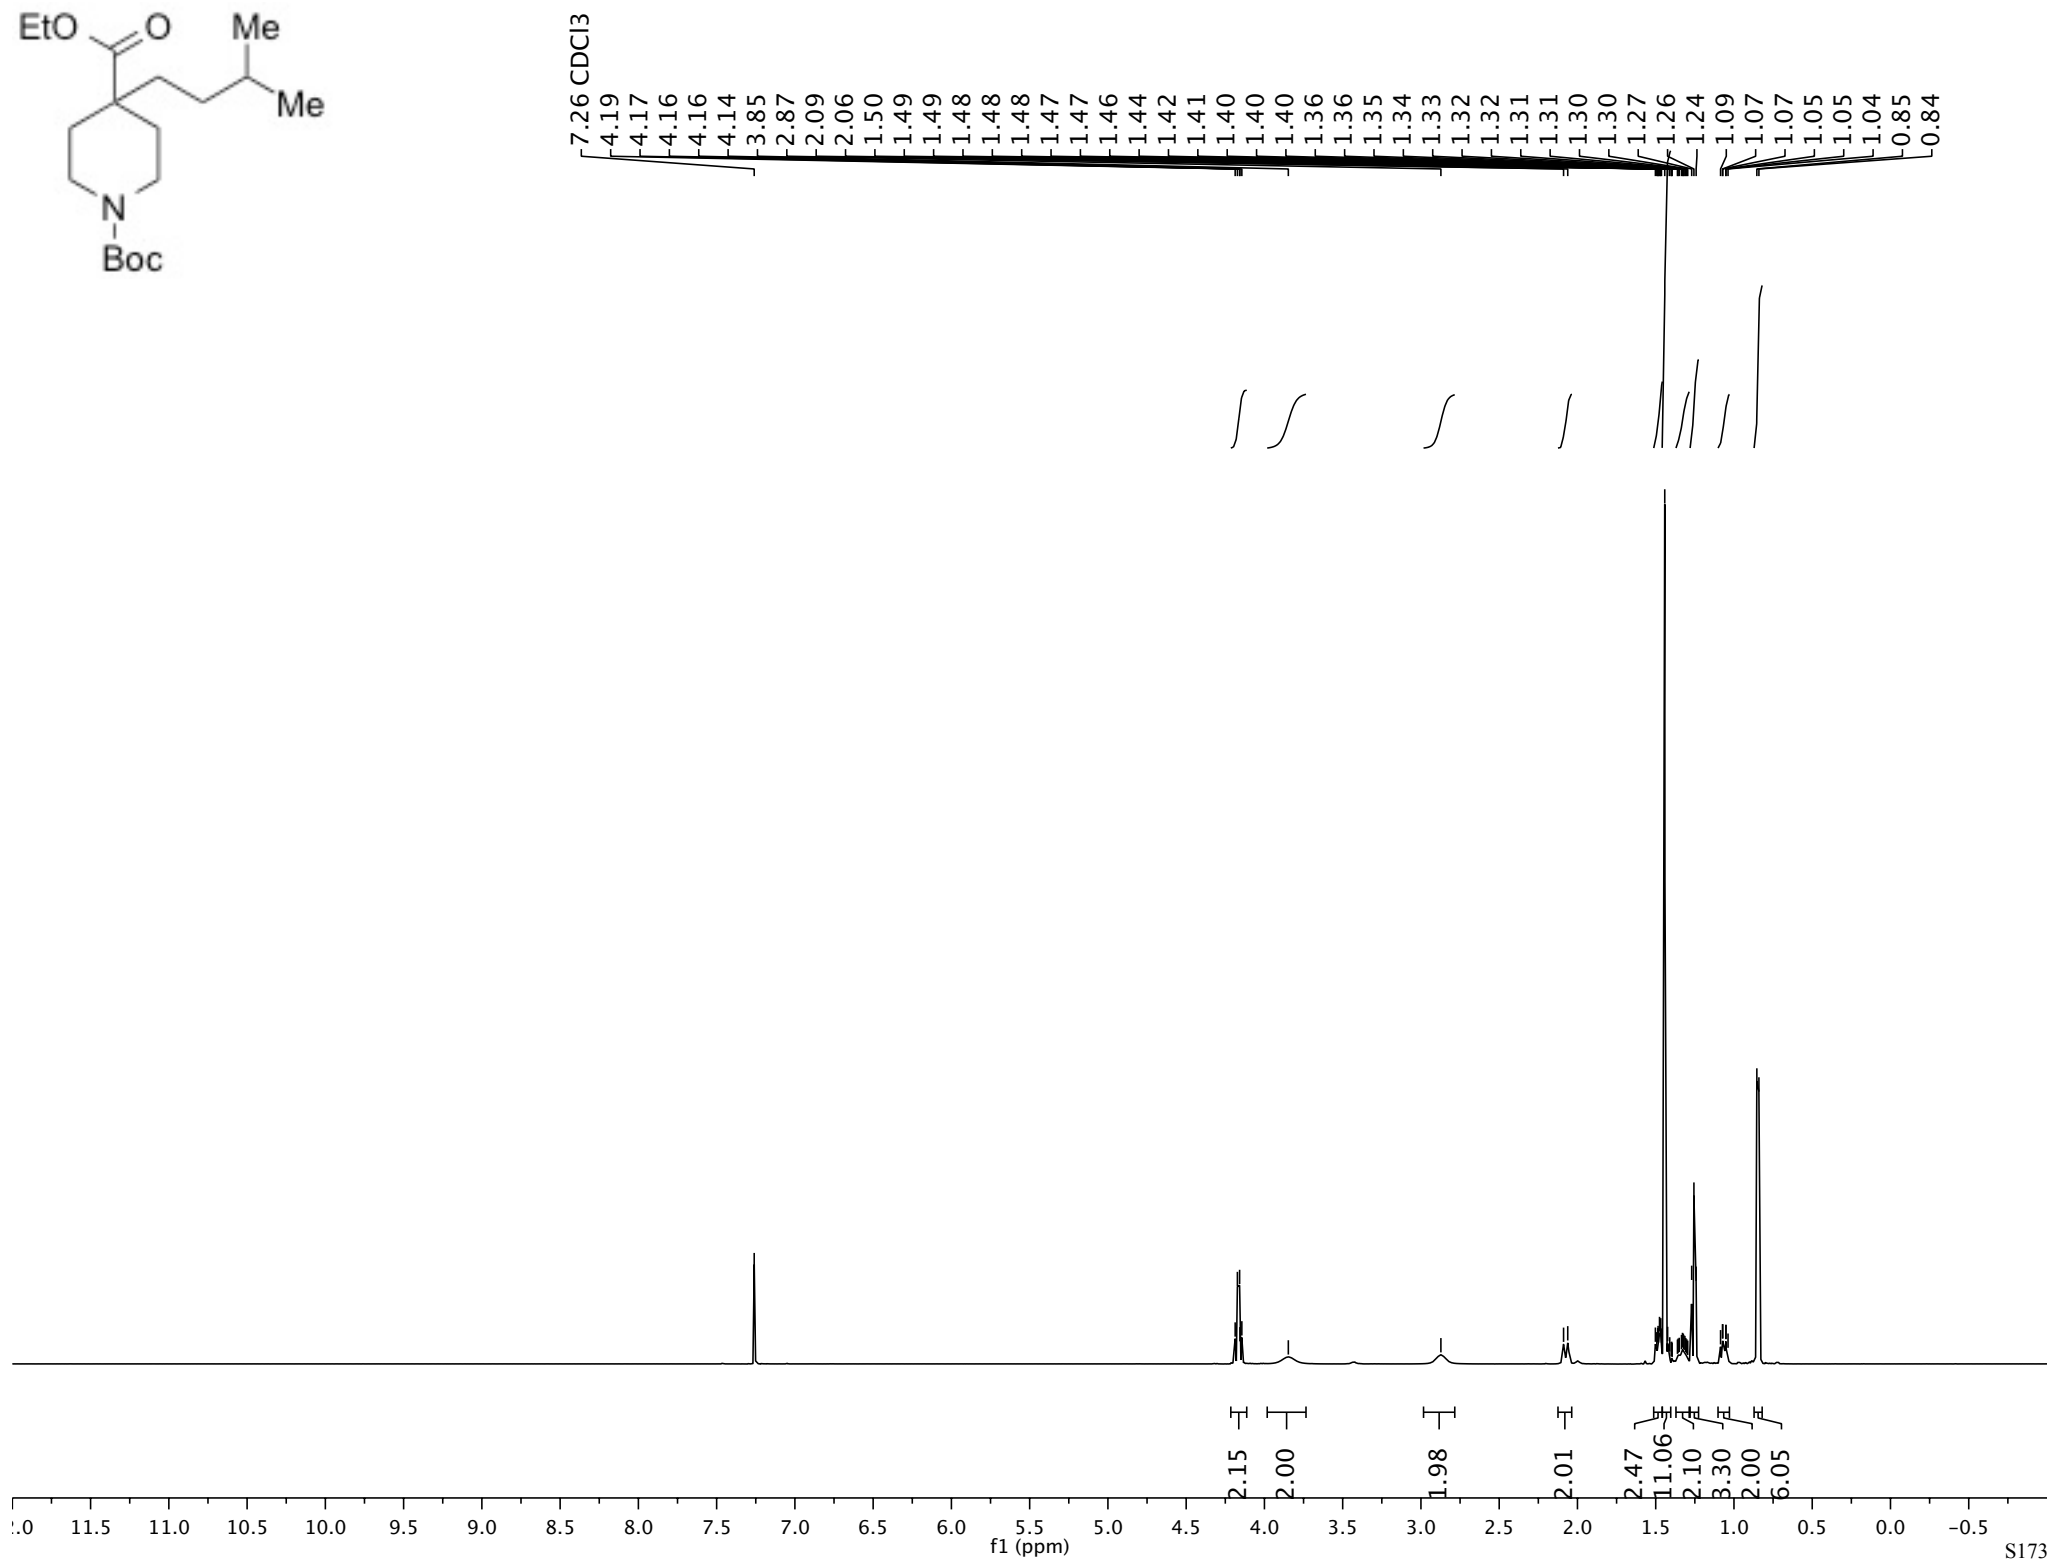

| Parameter              | Value           |
|------------------------|-----------------|
| Origin                 | Varian          |
| Spectrometer           | inova           |
| Solvent                | CDCl3           |
| Temperature            | 35.0            |
| Pulse Sequence         | s2pul           |
| Experiment             | 1D              |
| Probe                  | QUAD            |
| Number of Scans        | 296             |
| Receiver Gain          | 60              |
| Relaxation Delay       | 2.0000          |
| Pulse Width            | 0.0000          |
| Acquisition Time       | 1.0863          |
| Spectrometer Frequency | 125.66          |
| Spectral Width         | 30165.9         |
| Lowest Frequency       | -1268.5         |
| Nucleus                | <sup>13</sup> C |
| Acquired Size          | 32768           |
| Spectral Size          | 65536           |

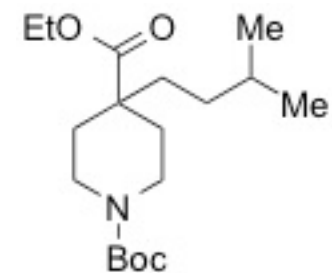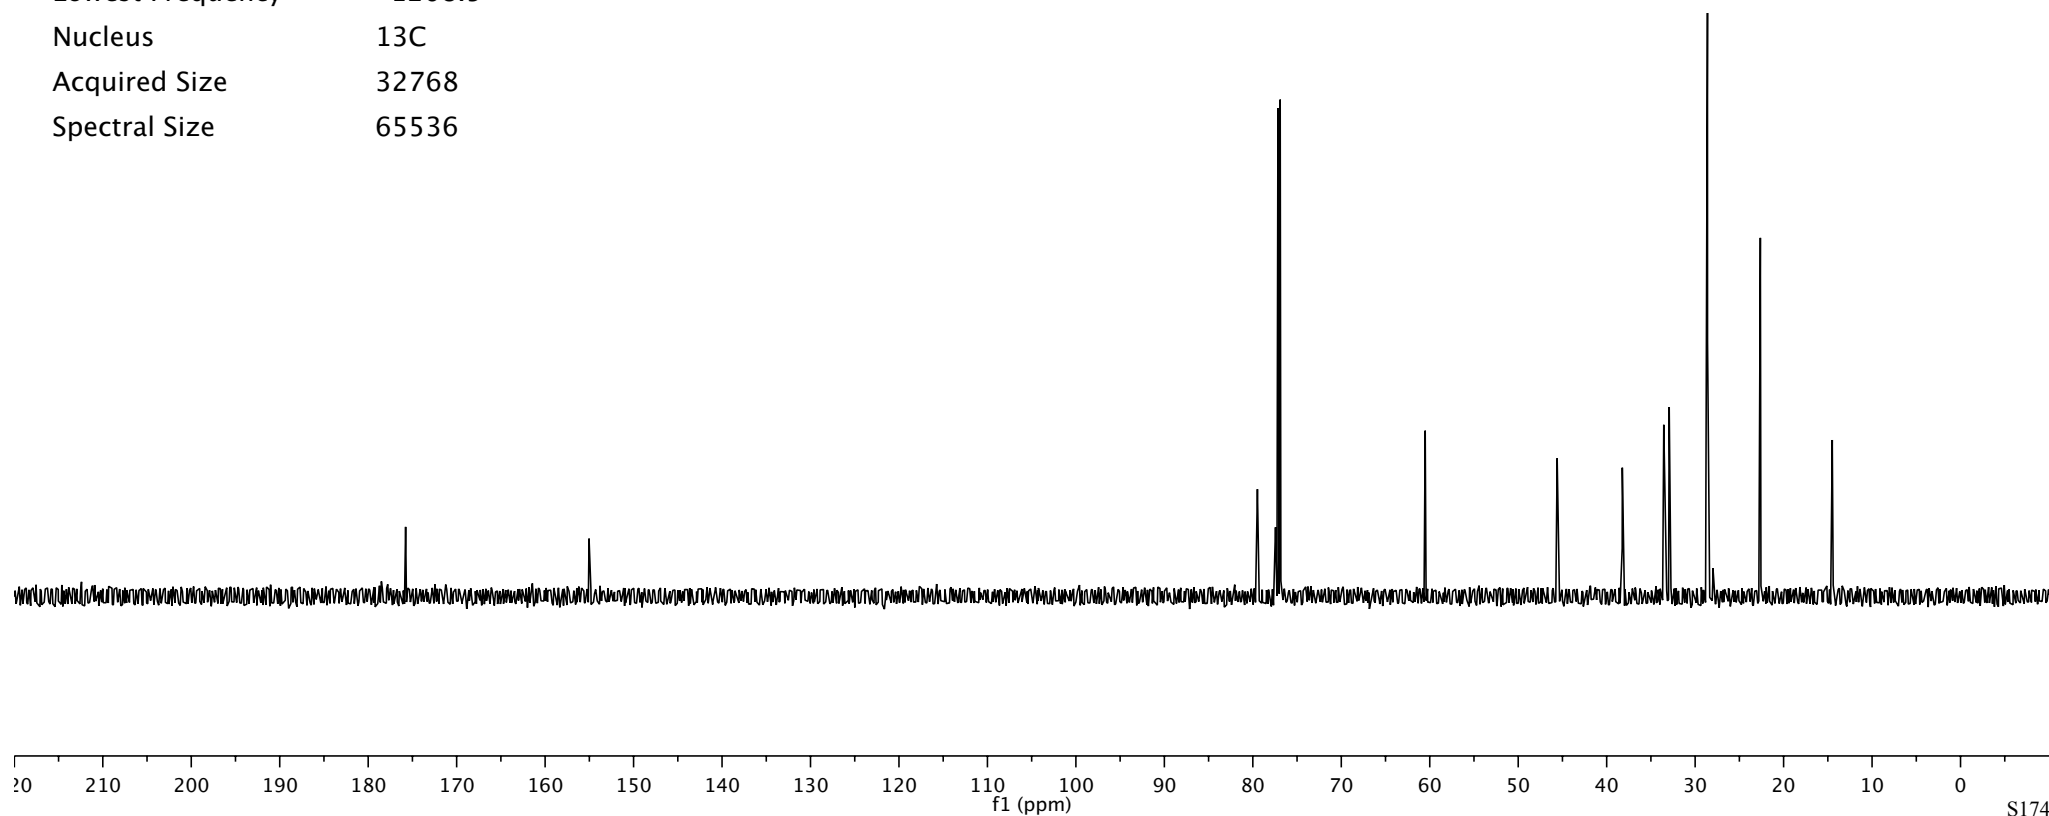



—175.77

—155.03

~79.48  
~77.16 CDCl<sub>3</sub>

—60.51

—45.60

~38.23

~33.54

~32.93

~28.60

~28.57

~28.45

~22.63

—14.50

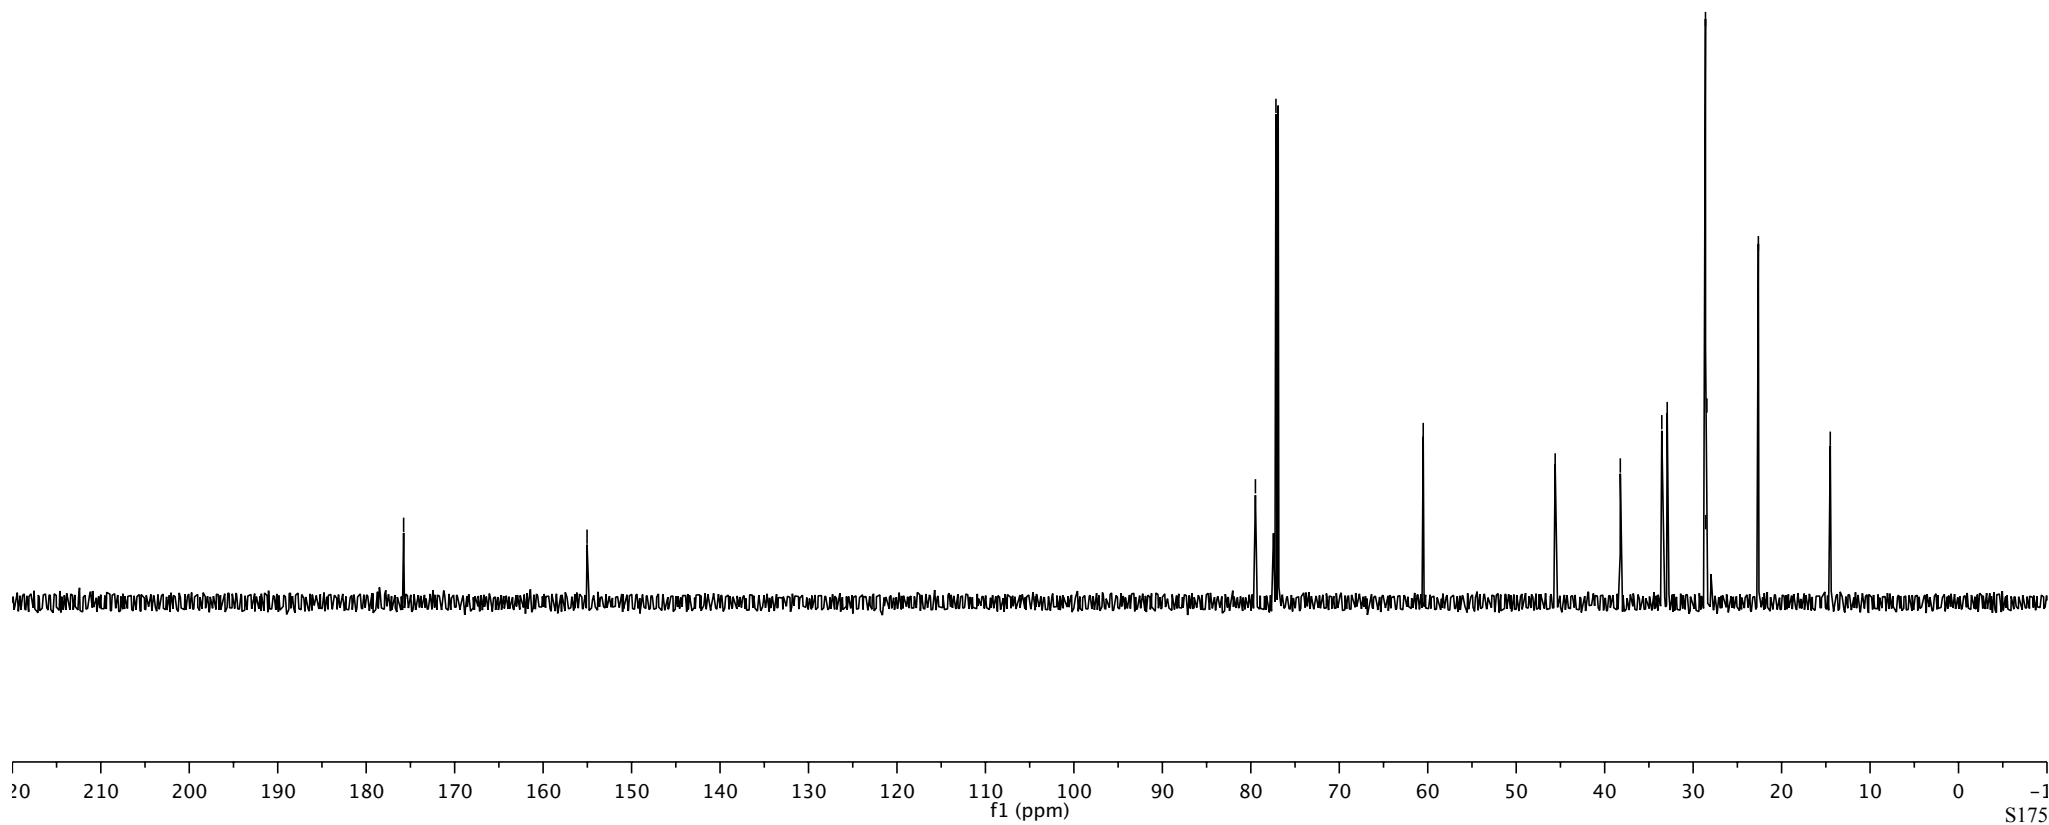



| Parameter              | Value          |
|------------------------|----------------|
| Origin                 | Varian         |
| Spectrometer           | inova          |
| Solvent                | CDCl3          |
| Temperature            | 21.1           |
| Pulse Sequence         | s2pul          |
| Experiment             | 1D             |
| Probe                  | hcn            |
| Number of Scans        | 16             |
| Receiver Gain          | 20             |
| Relaxation Delay       | 10.0000        |
| Pulse Width            | 0.0000         |
| Acquisition Time       | 4.0960         |
| Spectrometer Frequency | 500.07         |
| Spectral Width         | 8000.0         |
| Lowest Frequency       | -1510.6        |
| Nucleus                | <sup>1</sup> H |
| Acquired Size          | 32768          |
| Spectral Size          | 65536          |

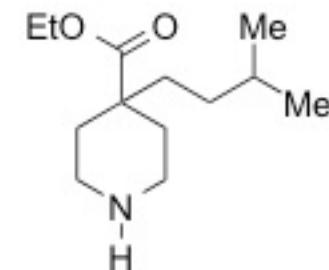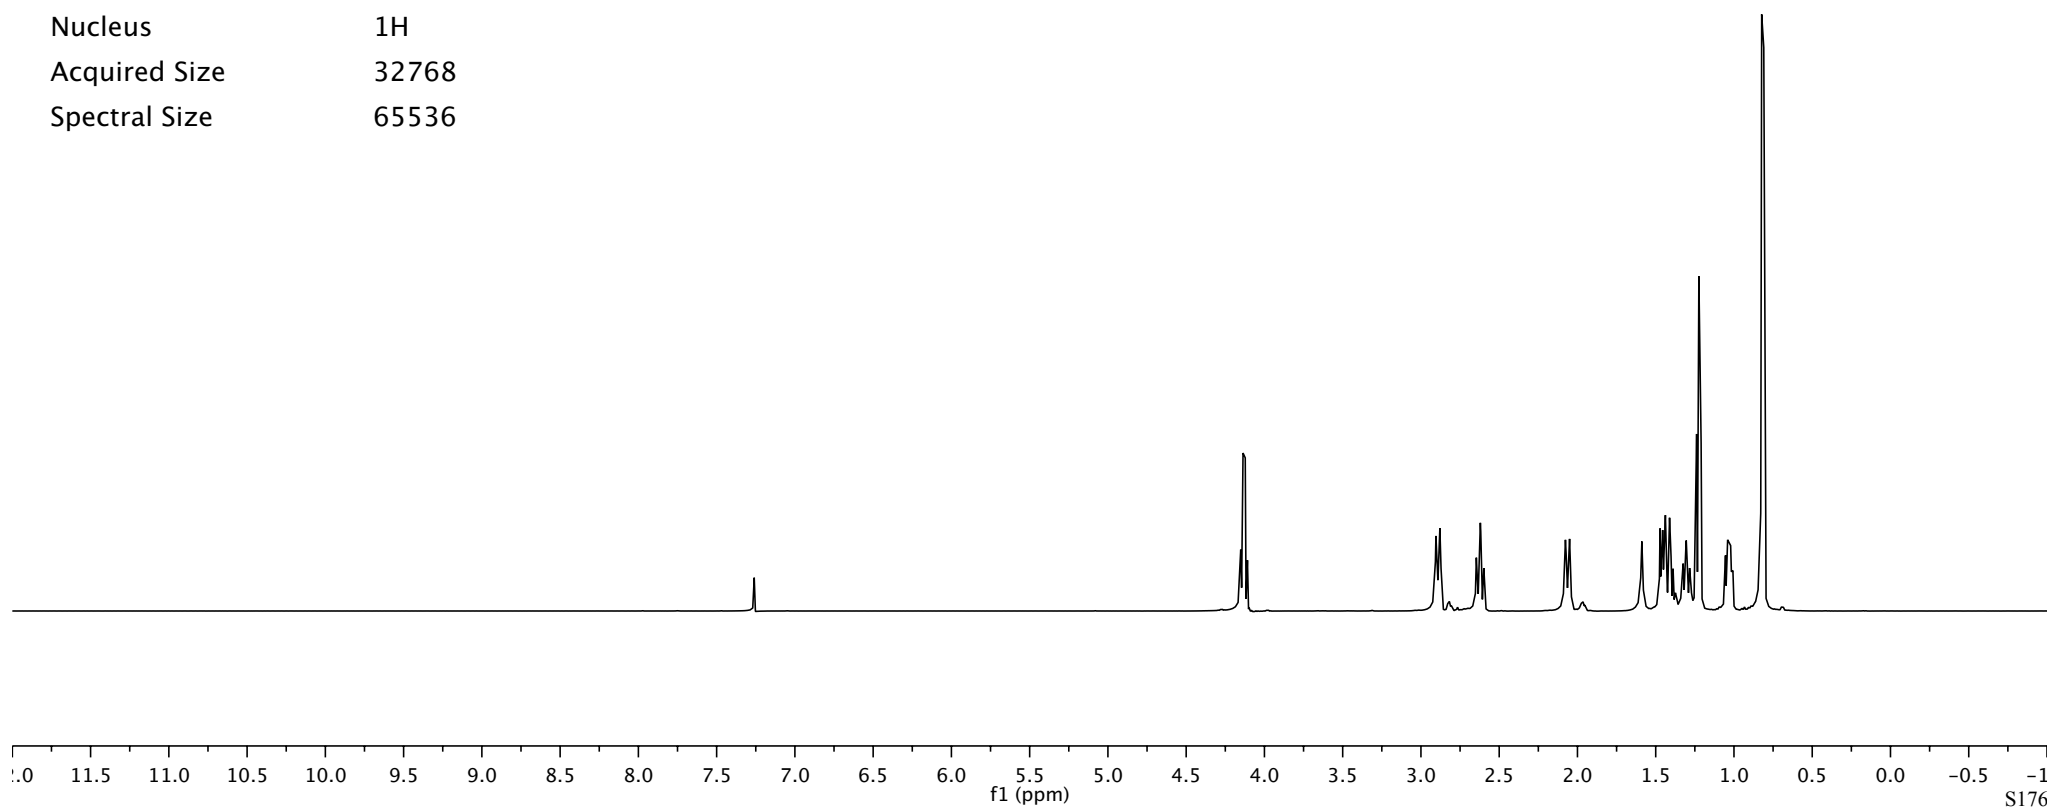

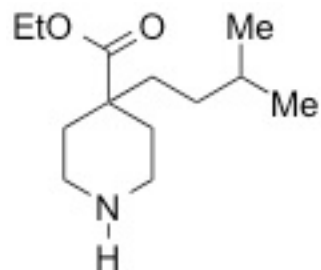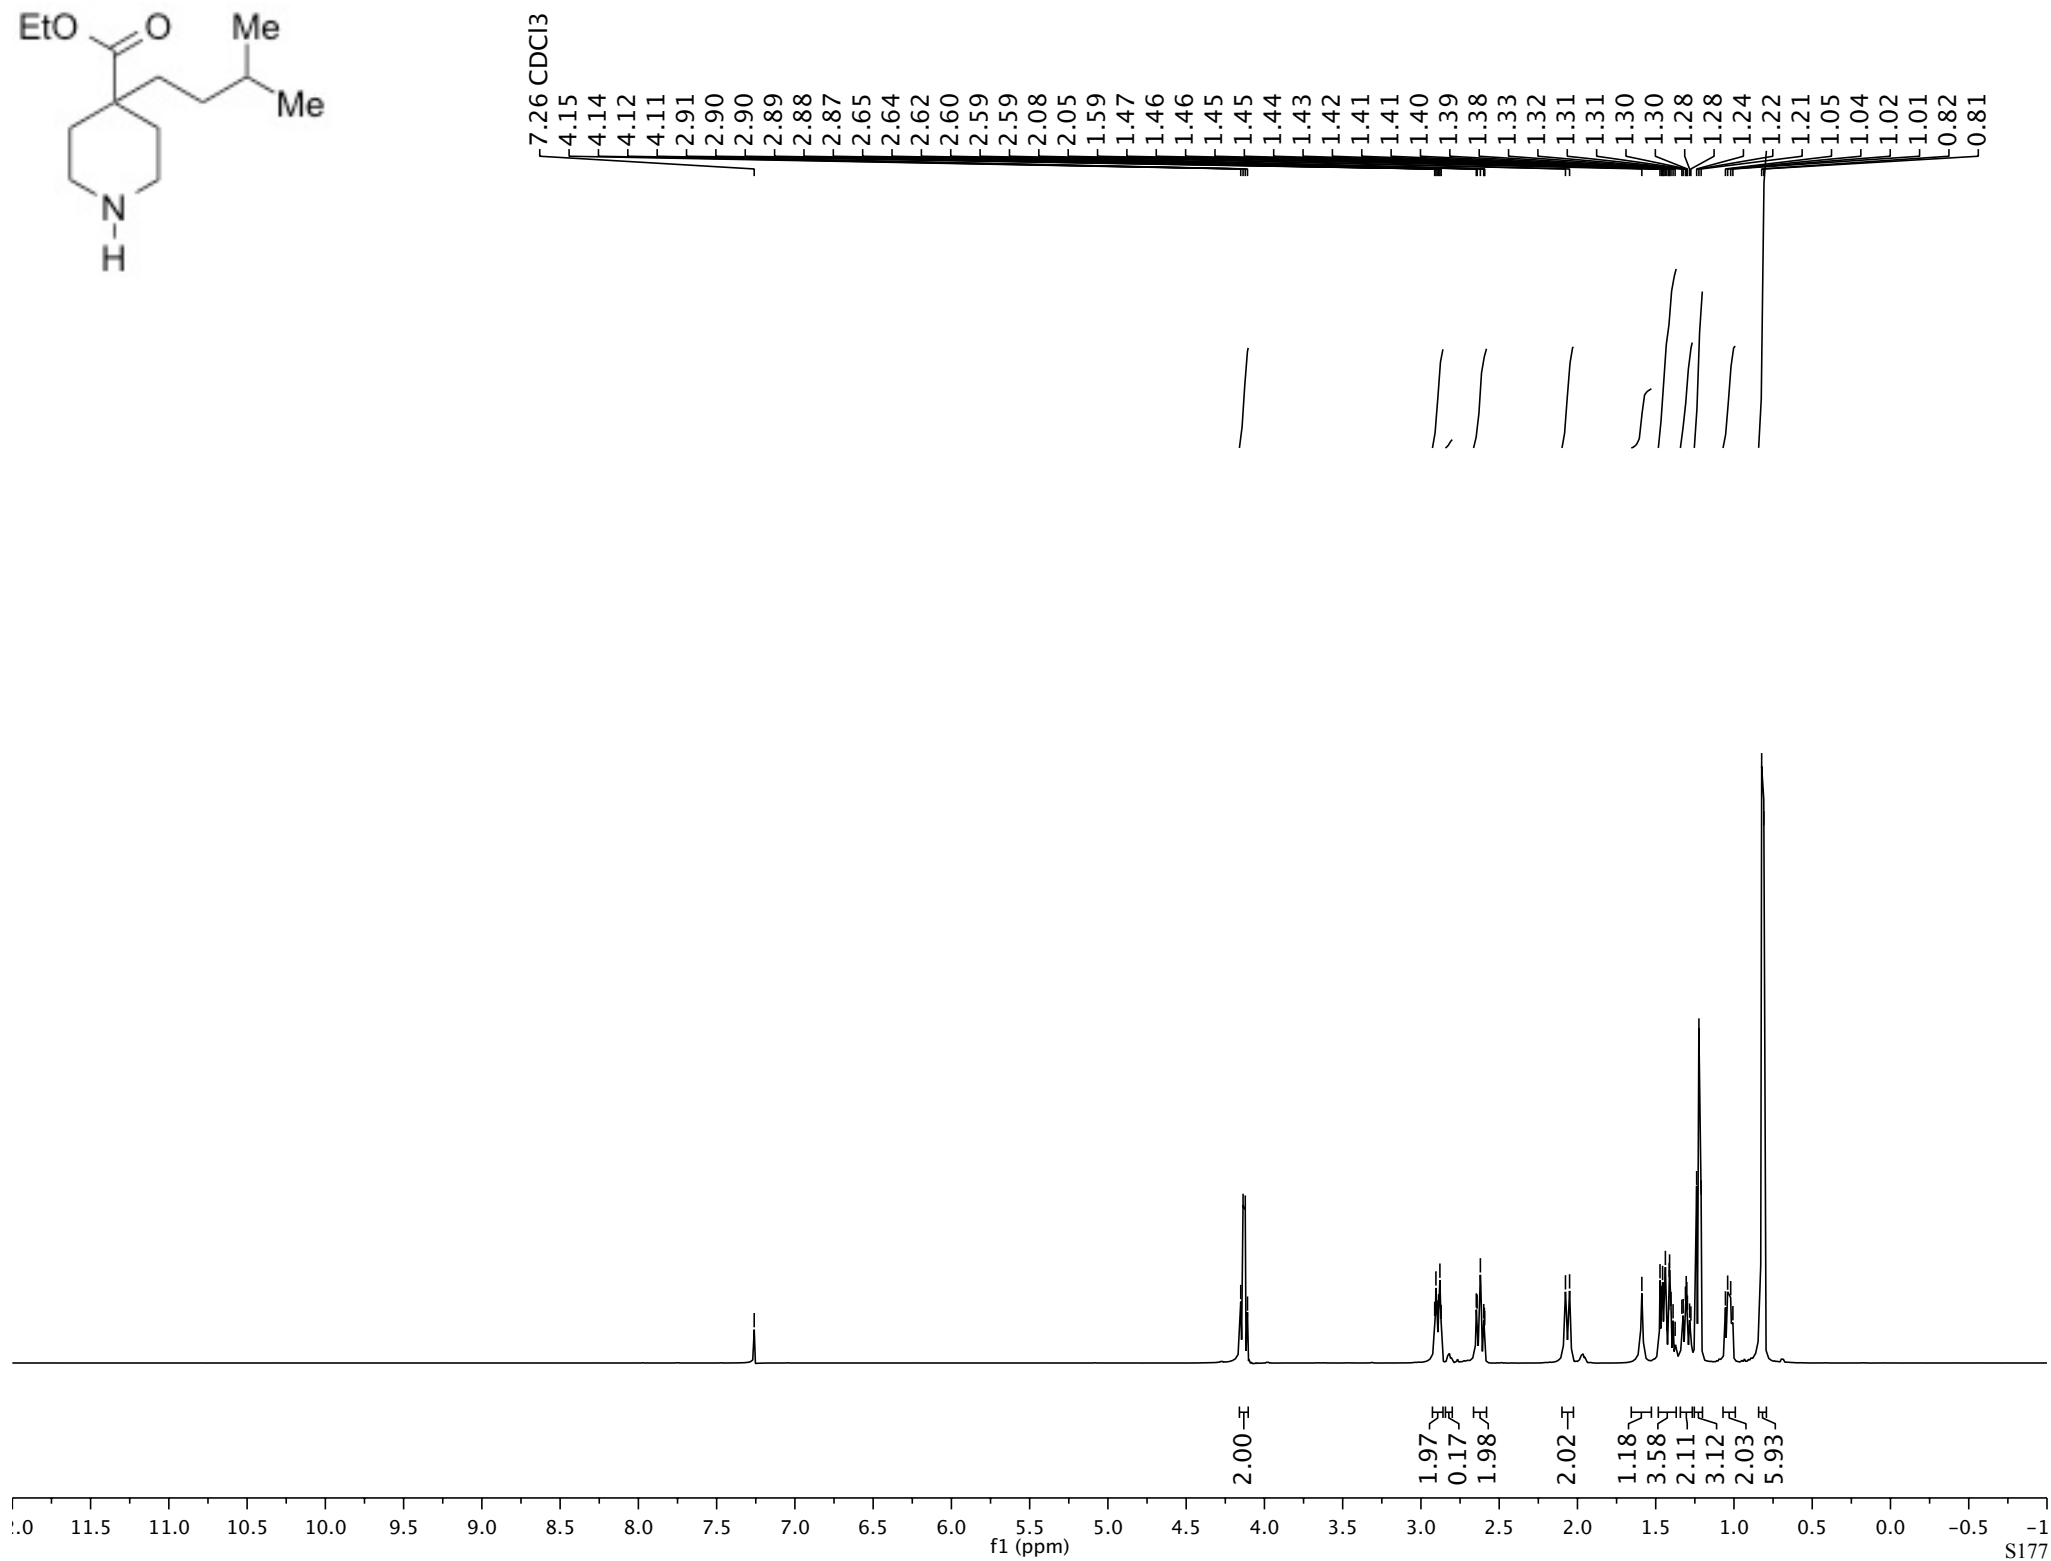

| Parameter              | Value   |
|------------------------|---------|
| Origin                 | Varian  |
| Spectrometer           | inova   |
| Solvent                | CDCl3   |
| Temperature            | 20.0    |
| Pulse Sequence         | s2pul   |
| Experiment             | 1D      |
| Probe                  | QUAD    |
| Number of Scans        | 241     |
| Receiver Gain          | 60      |
| Relaxation Delay       | 2.0000  |
| Pulse Width            | 0.0000  |
| Acquisition Time       | 1.0863  |
| Spectrometer Frequency | 125.66  |
| Spectral Width         | 30165.9 |
| Lowest Frequency       | -1274.1 |
| Nucleus                | 13C     |
| Acquired Size          | 32768   |
| Spectral Size          | 65536   |

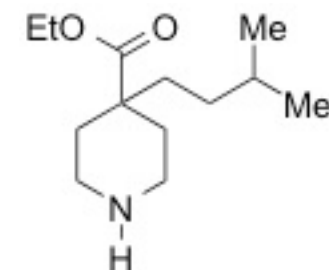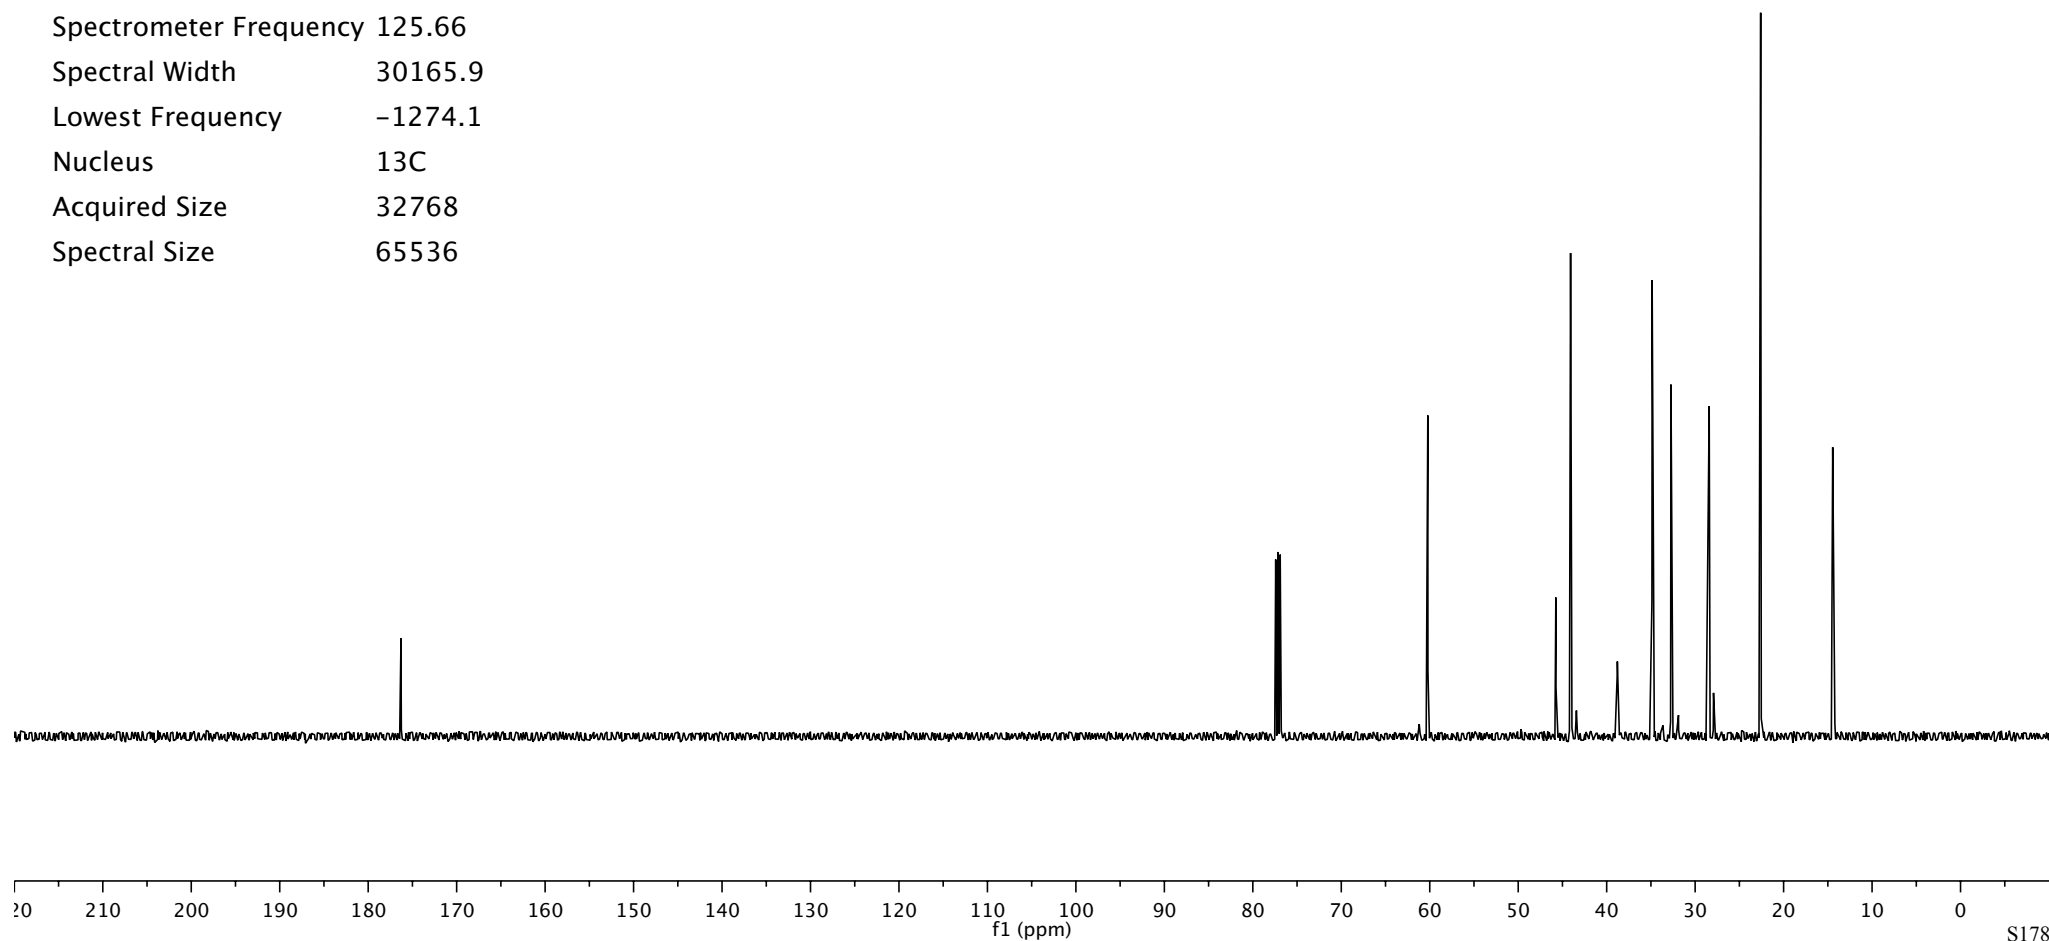

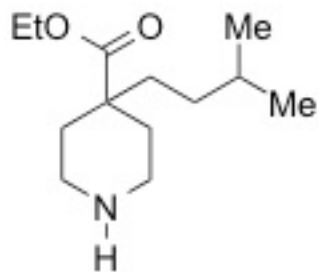

—176.29

—77.16 CDCl<sub>3</sub>

—60.22

—45.75

—44.08

—38.79

—34.86

—32.73

—28.41

—22.59

—14.45

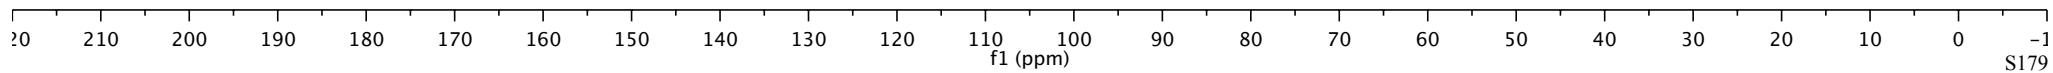

| Parameter              | Value          |
|------------------------|----------------|
| Origin                 | Varian         |
| Spectrometer           | inova          |
| Solvent                | CDCl3          |
| Temperature            | 20.0           |
| Pulse Sequence         | s2pul          |
| Experiment             | 1D             |
| Probe                  | QUAD           |
| Number of Scans        | 8              |
| Receiver Gain          | 30             |
| Relaxation Delay       | 0.0000         |
| Pulse Width            | 0.0000         |
| Acquisition Time       | 4.6645         |
| Spectrometer Frequency | 499.69         |
| Spectral Width         | 7024.9         |
| Lowest Frequency       | -1021.9        |
| Nucleus                | <sup>1</sup> H |
| Acquired Size          | 32768          |
| Spectral Size          | 65536          |

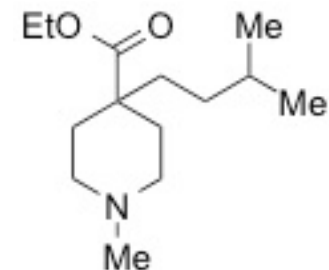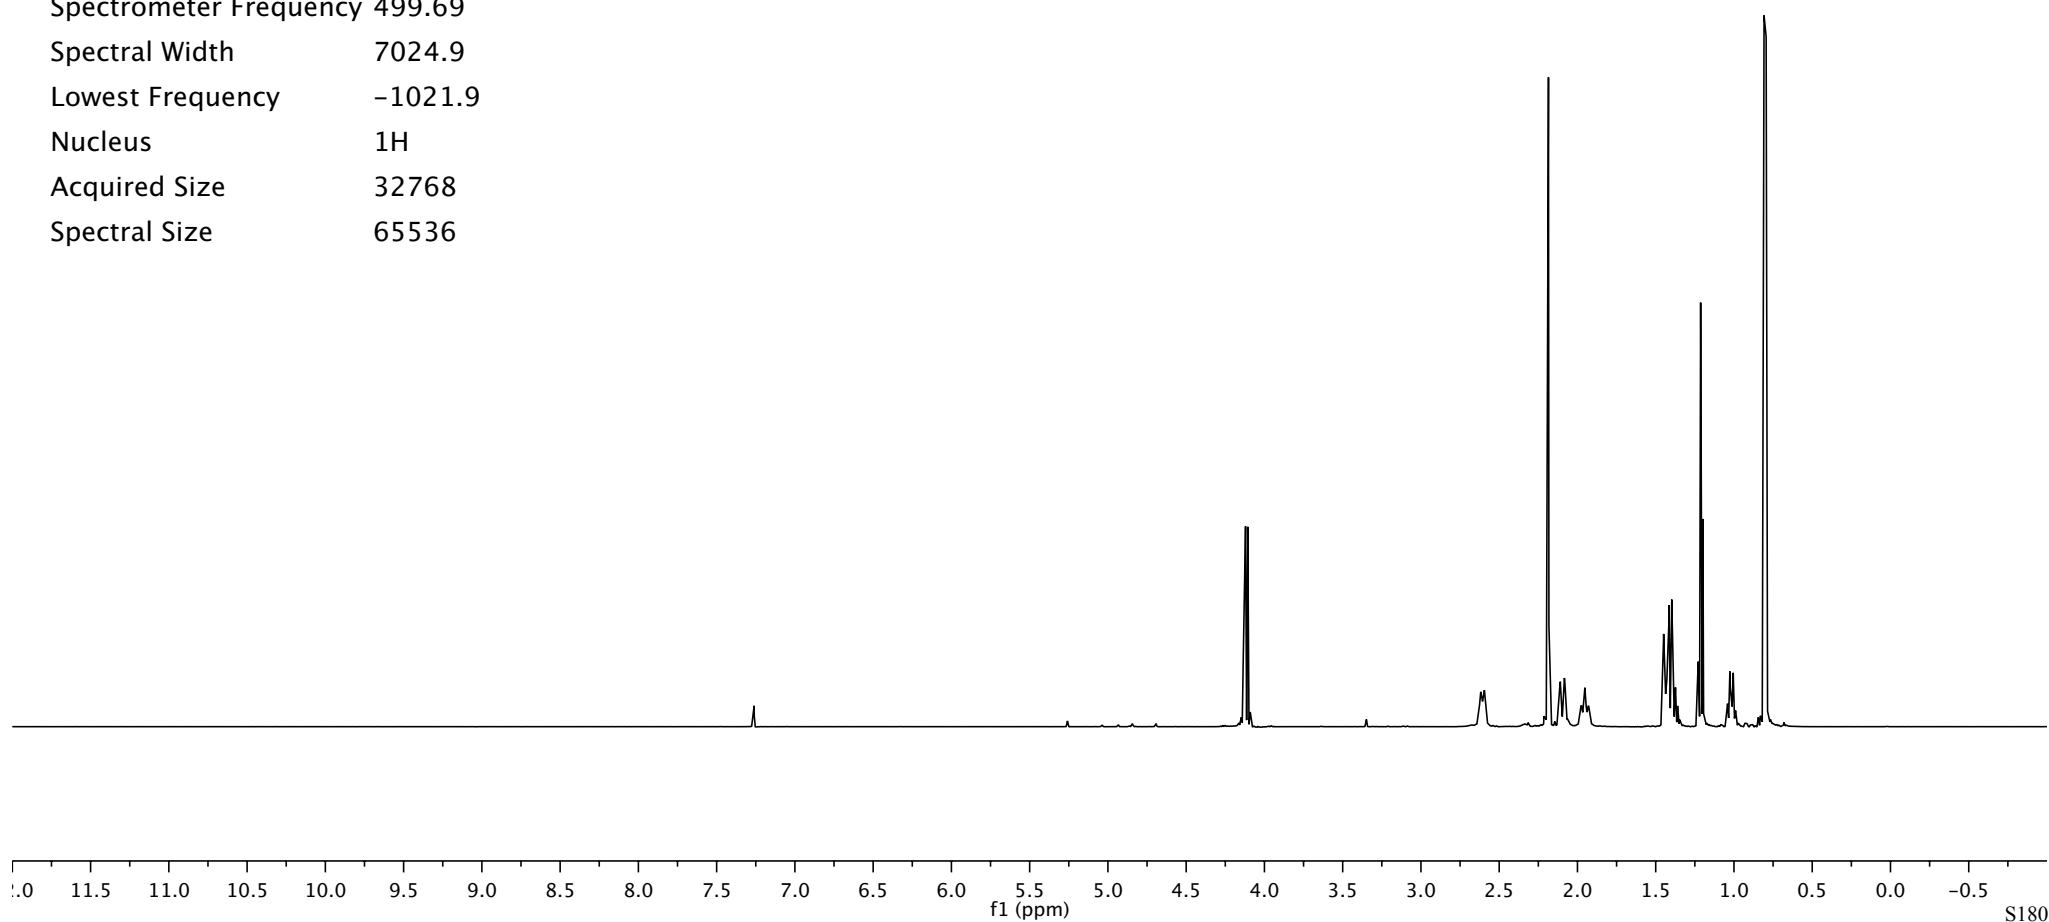

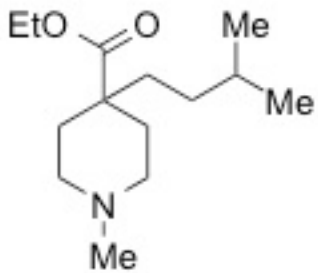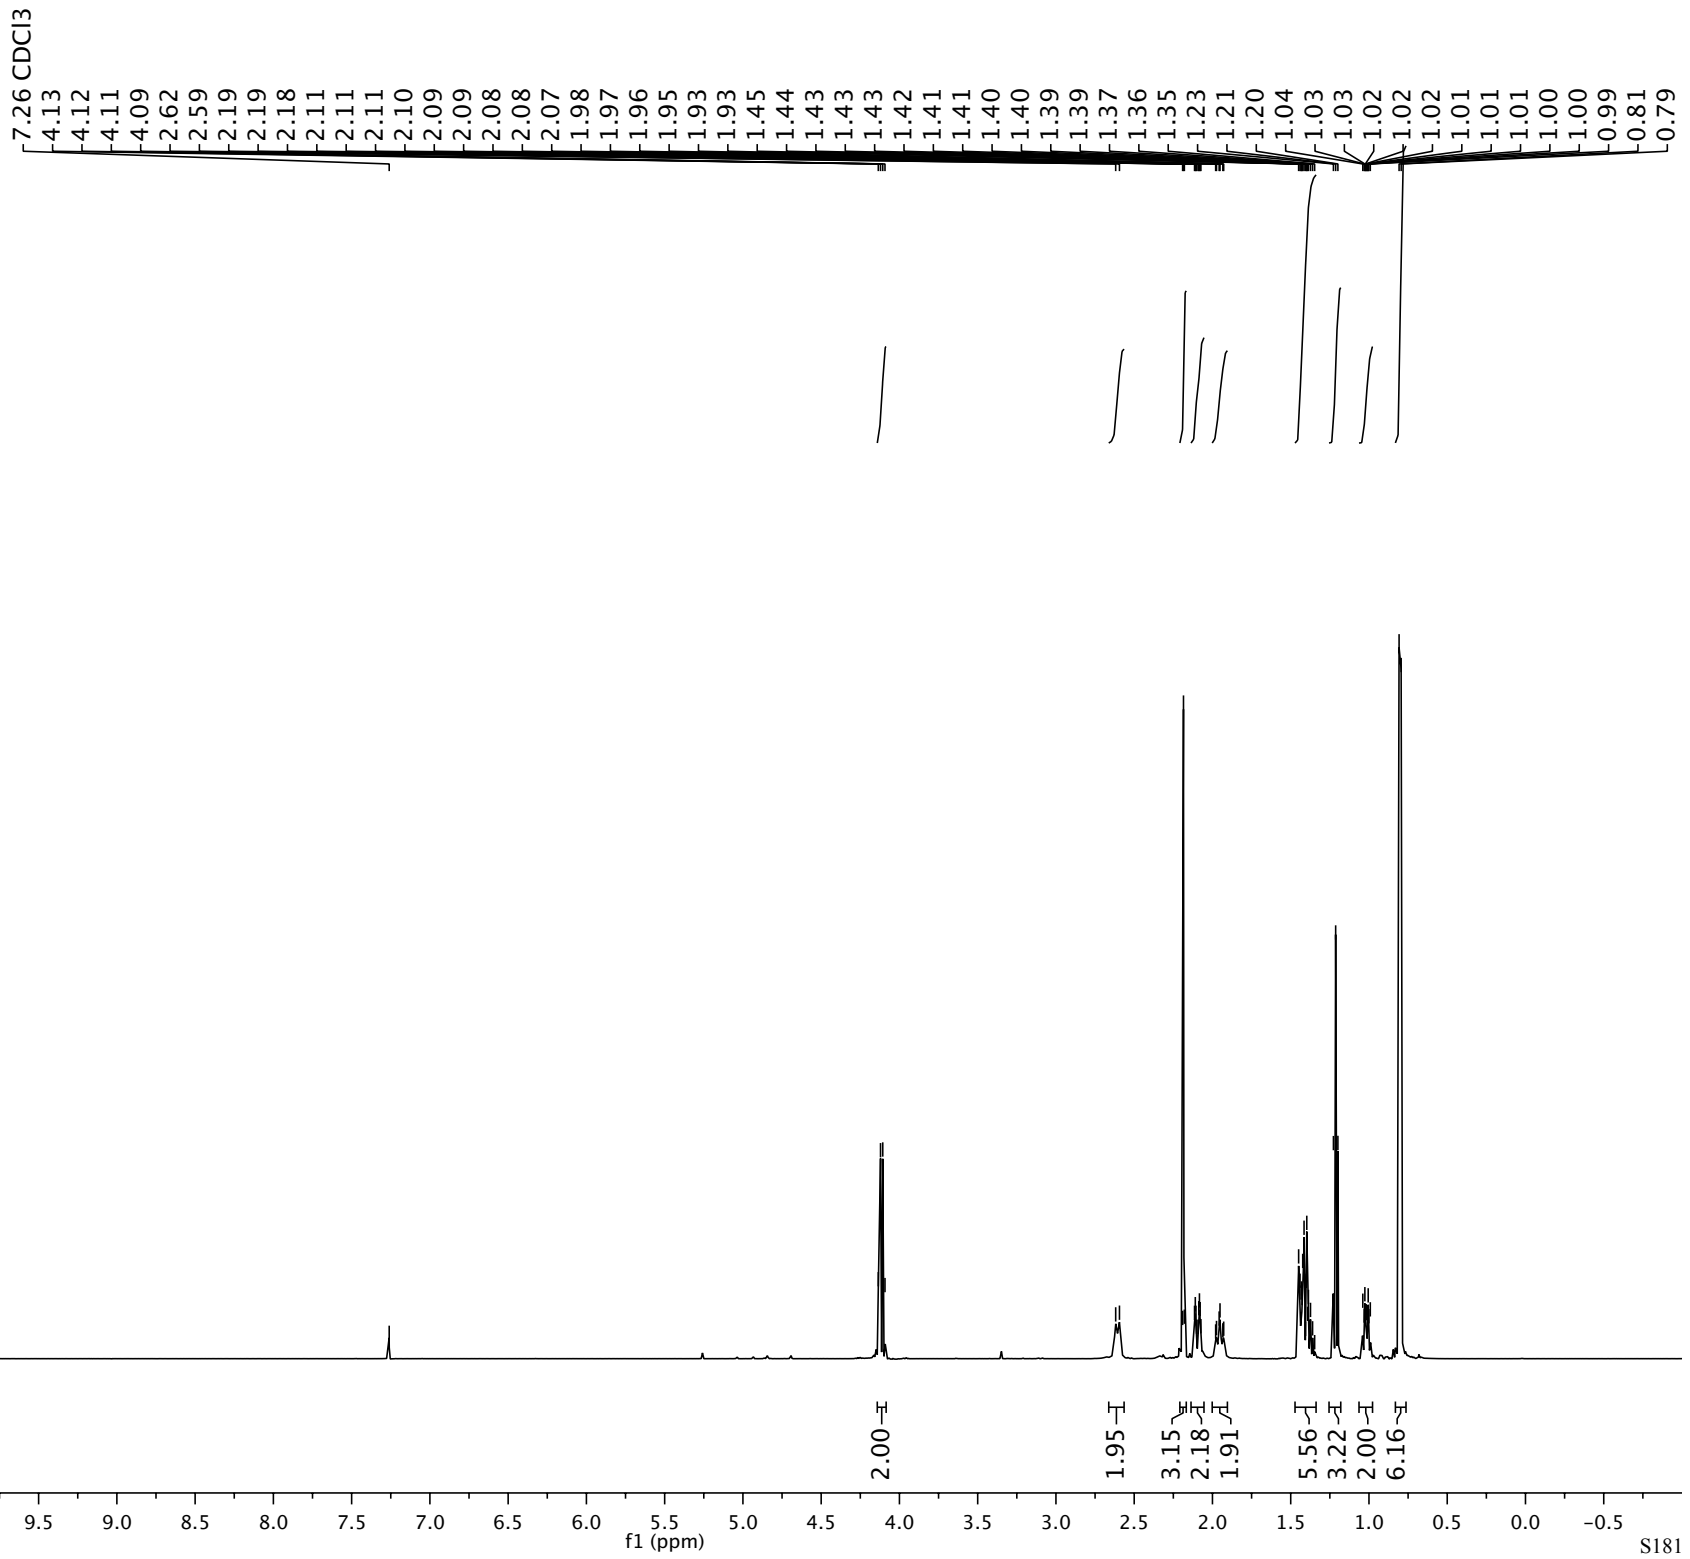

| Parameter              | Value           |
|------------------------|-----------------|
| Origin                 | Varian          |
| Spectrometer           | inova           |
| Solvent                | CDCl3           |
| Temperature            | 20.0            |
| Pulse Sequence         | s2pul           |
| Experiment             | 1D              |
| Probe                  | QUAD            |
| Number of Scans        | 80              |
| Receiver Gain          | 60              |
| Relaxation Delay       | 1.0000          |
| Pulse Width            | 0.0000          |
| Acquisition Time       | 1.0863          |
| Spectrometer Frequency | 125.66          |
| Spectral Width         | 30165.9         |
| Lowest Frequency       | -1276.3         |
| Nucleus                | <sup>13</sup> C |
| Acquired Size          | 32768           |
| Spectral Size          | 65536           |

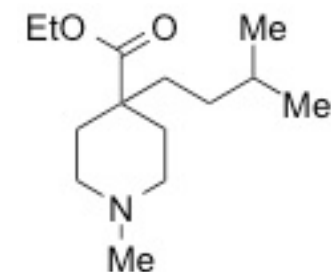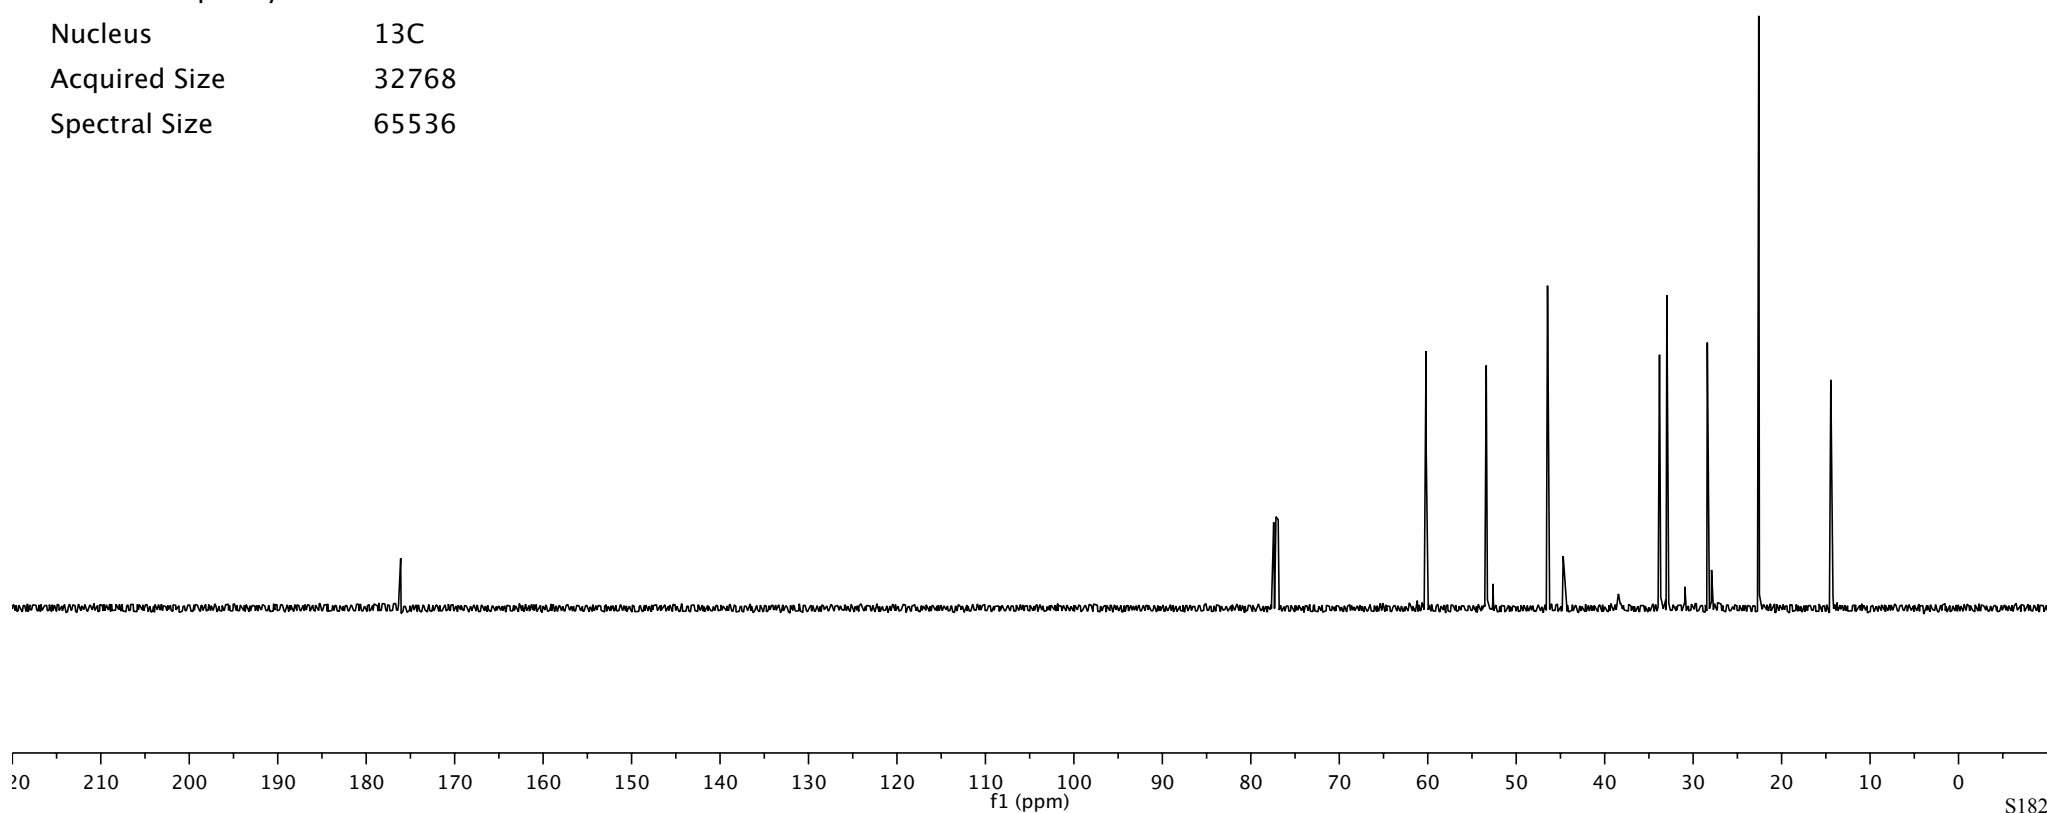

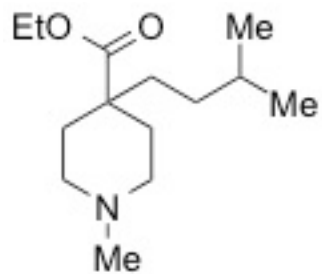

—176.10

—77.16 CDCl<sub>3</sub>

—60.19

—53.39

—46.46

—44.69

—38.44

—33.80

—32.97

—28.40

—22.58

—14.44

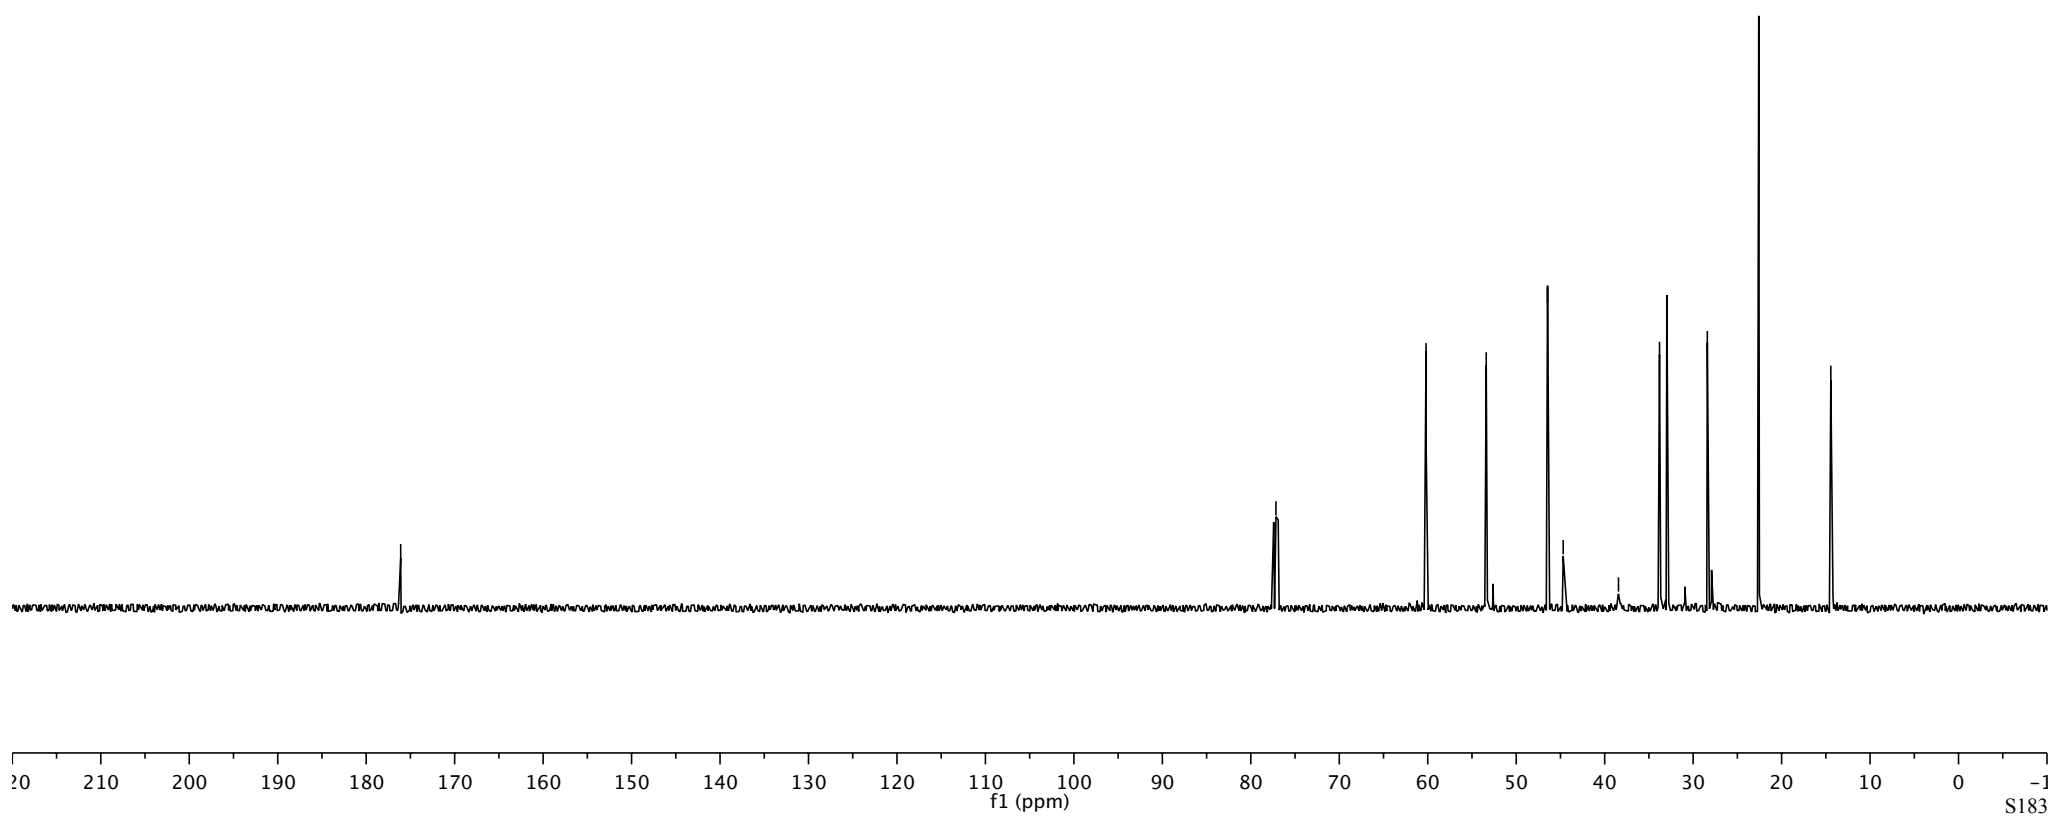



| Parameter              | Value          |
|------------------------|----------------|
| Origin                 | Varian         |
| Spectrometer           | inova          |
| Solvent                | CDCl3          |
| Temperature            | 20.0           |
| Pulse Sequence         | s2pul          |
| Experiment             | 1D             |
| Probe                  | hcn            |
| Number of Scans        | 8              |
| Receiver Gain          | 36             |
| Relaxation Delay       | 10.0000        |
| Pulse Width            | 0.0000         |
| Acquisition Time       | 4.0960         |
| Spectrometer Frequency | 500.07         |
| Spectral Width         | 8000.0         |
| Lowest Frequency       | -1510.6        |
| Nucleus                | <sup>1</sup> H |
| Acquired Size          | 32768          |
| Spectral Size          | 65536          |

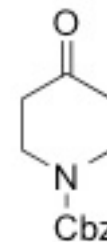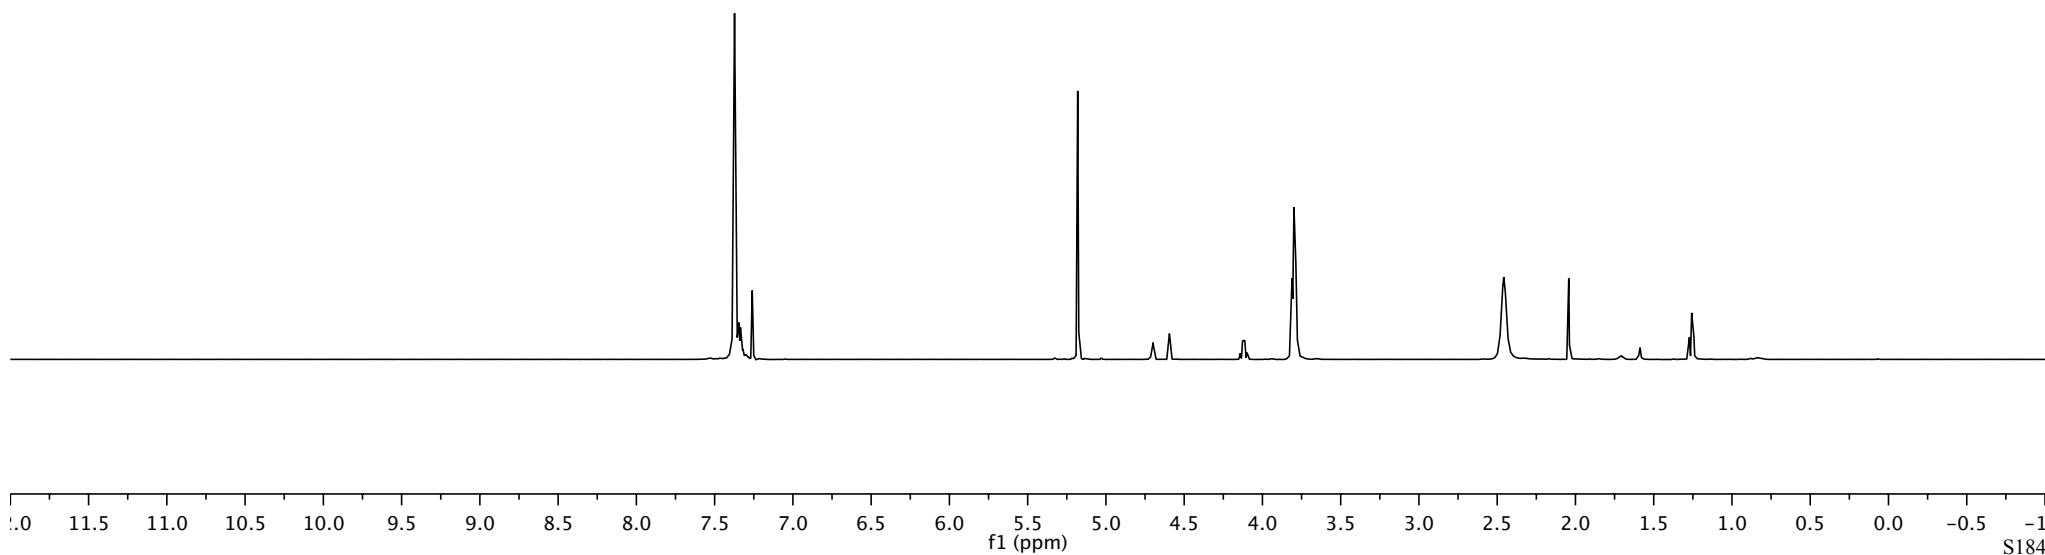

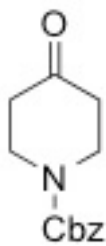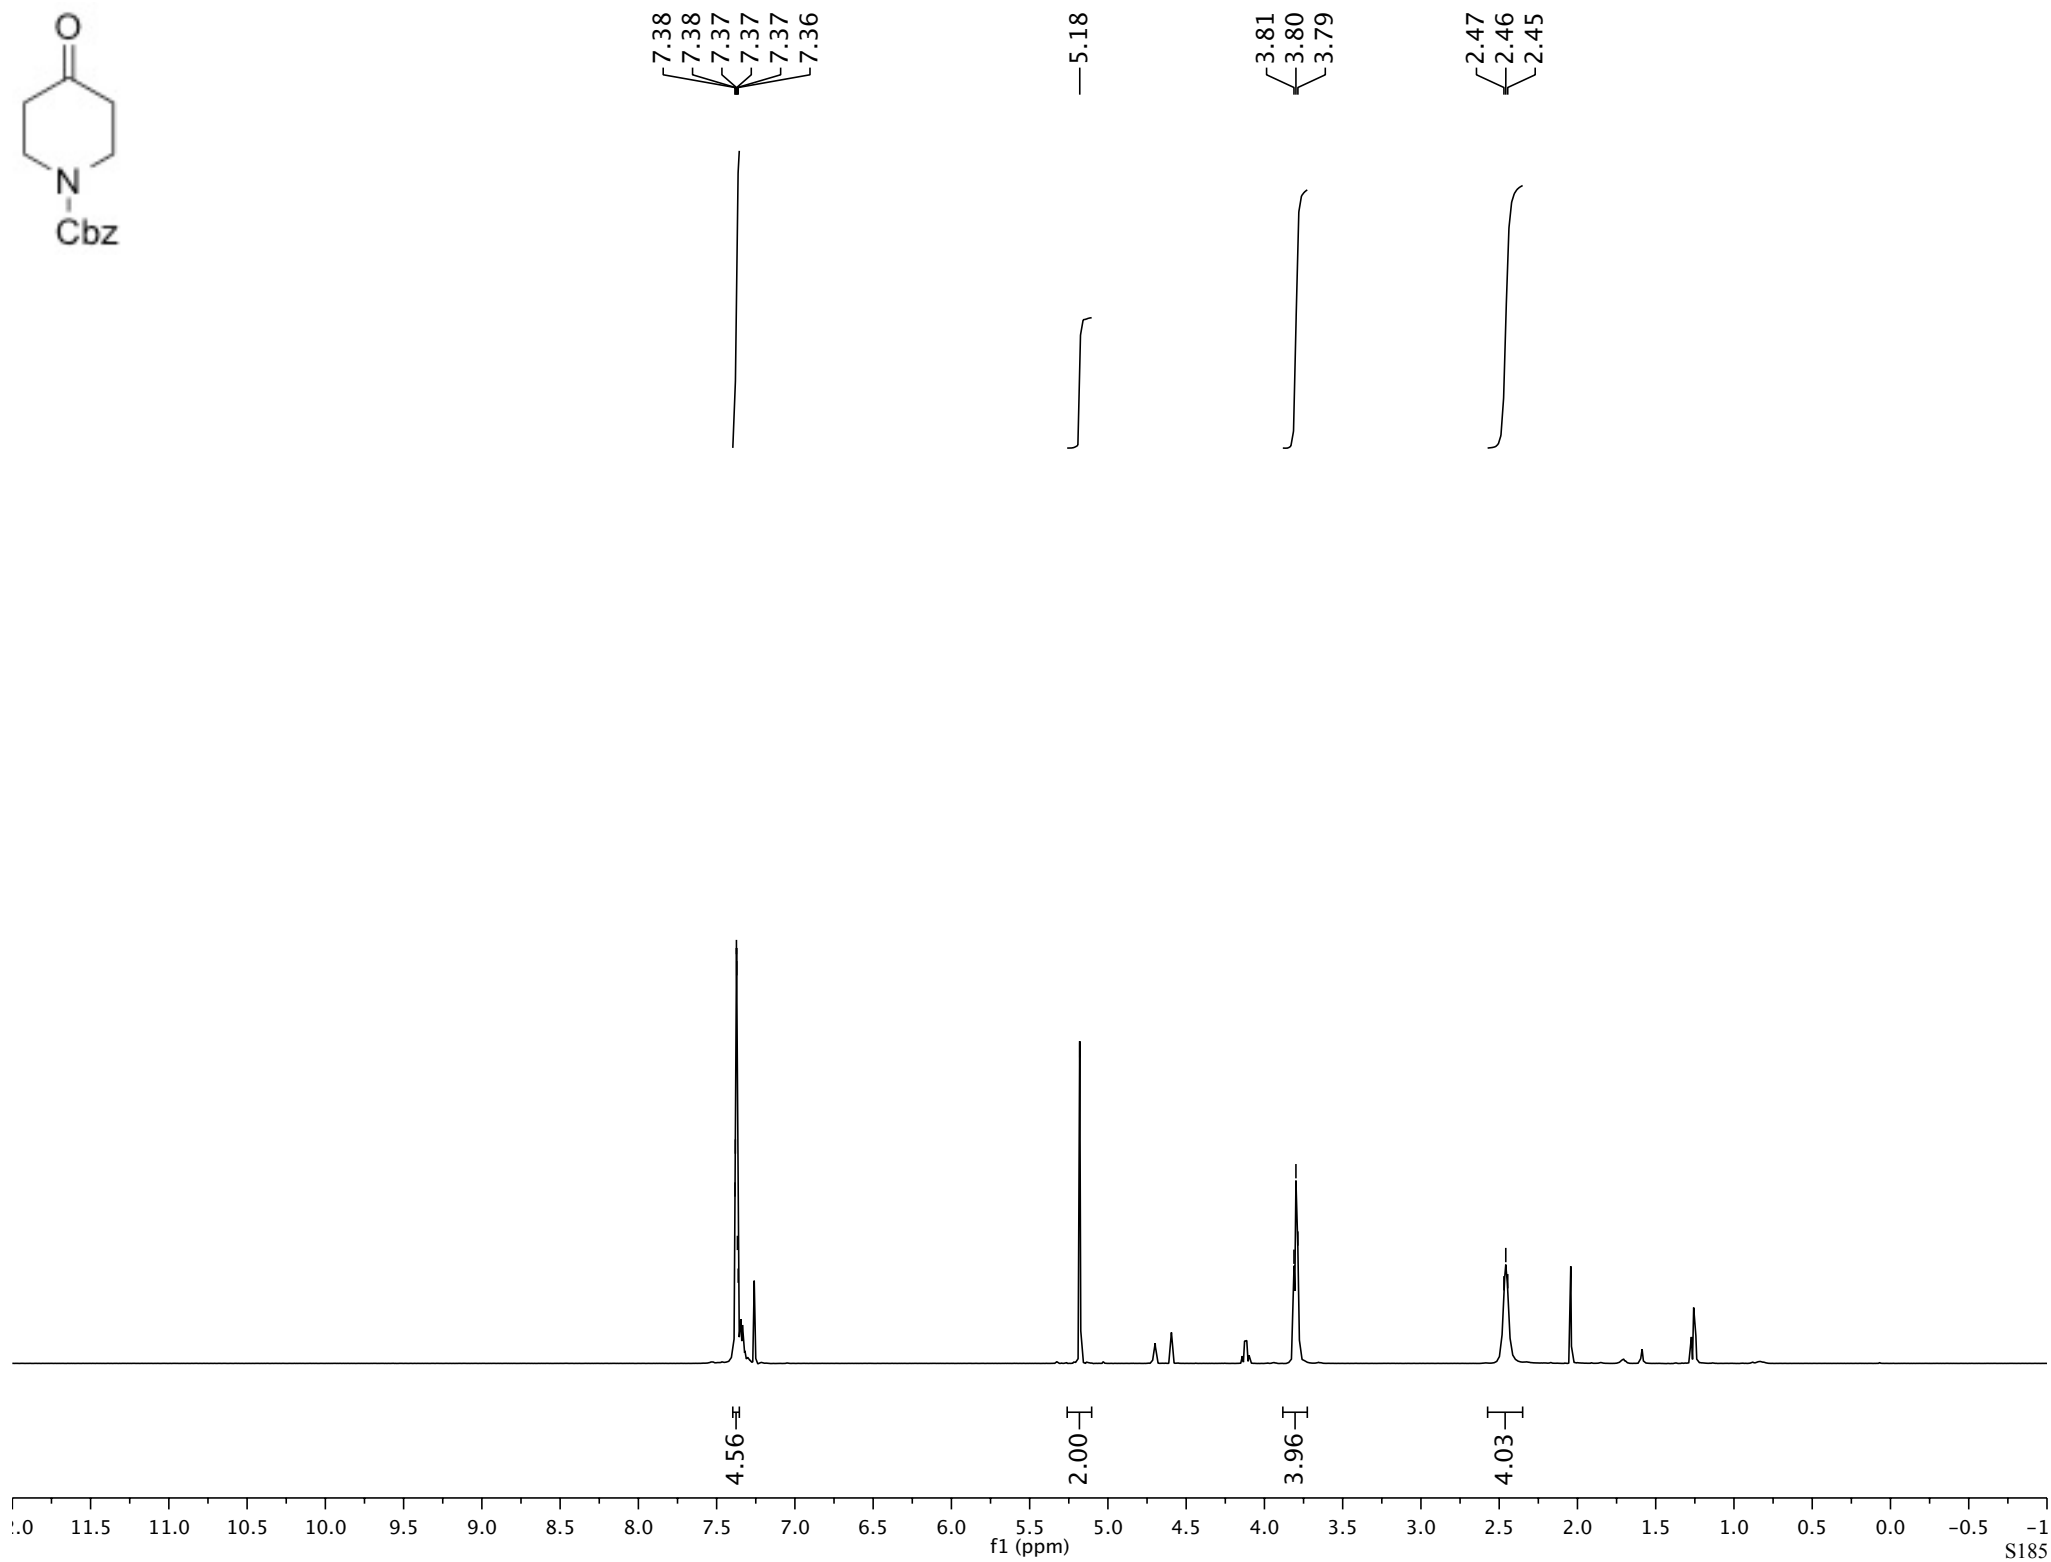

| Parameter              | Value          |
|------------------------|----------------|
| Origin                 | Varian         |
| Spectrometer           | inova          |
| Solvent                | CDCl3          |
| Temperature            | 20.0           |
| Pulse Sequence         | s2pul          |
| Experiment             | 1D             |
| Probe                  | QUAD           |
| Number of Scans        | 16             |
| Receiver Gain          | 60             |
| Relaxation Delay       | 2.0000         |
| Pulse Width            | 0.0000         |
| Acquisition Time       | 4.6645         |
| Spectrometer Frequency | 499.69         |
| Spectral Width         | 7024.9         |
| Lowest Frequency       | -1011.4        |
| Nucleus                | <sup>1</sup> H |
| Acquired Size          | 32768          |
| Spectral Size          | 65536          |

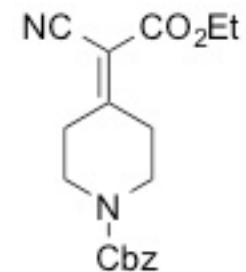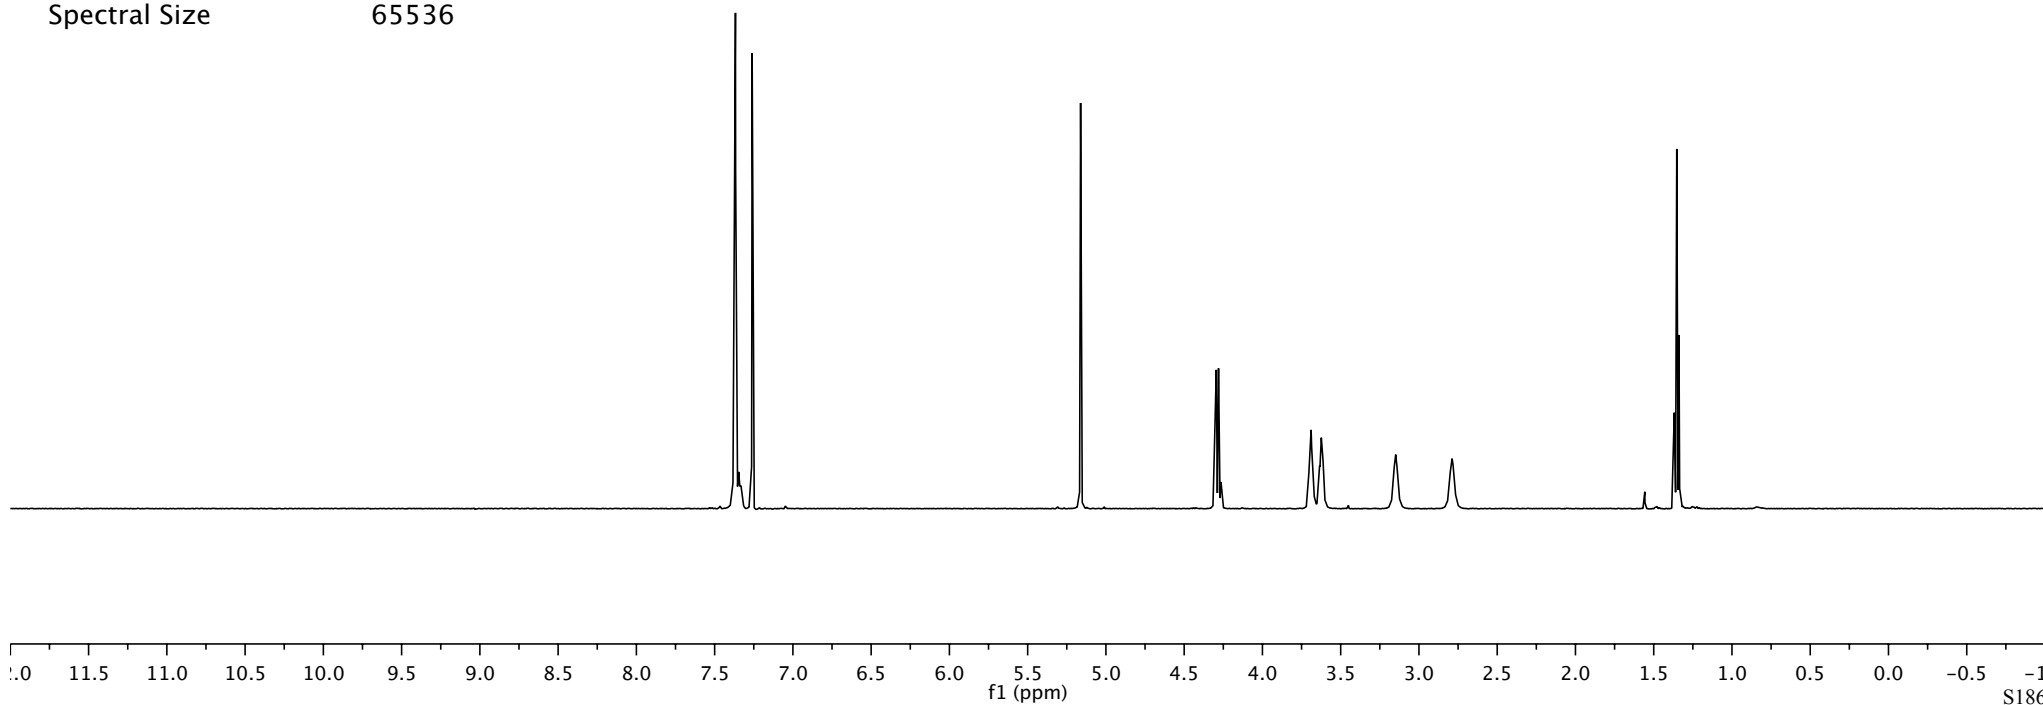

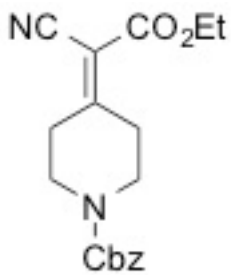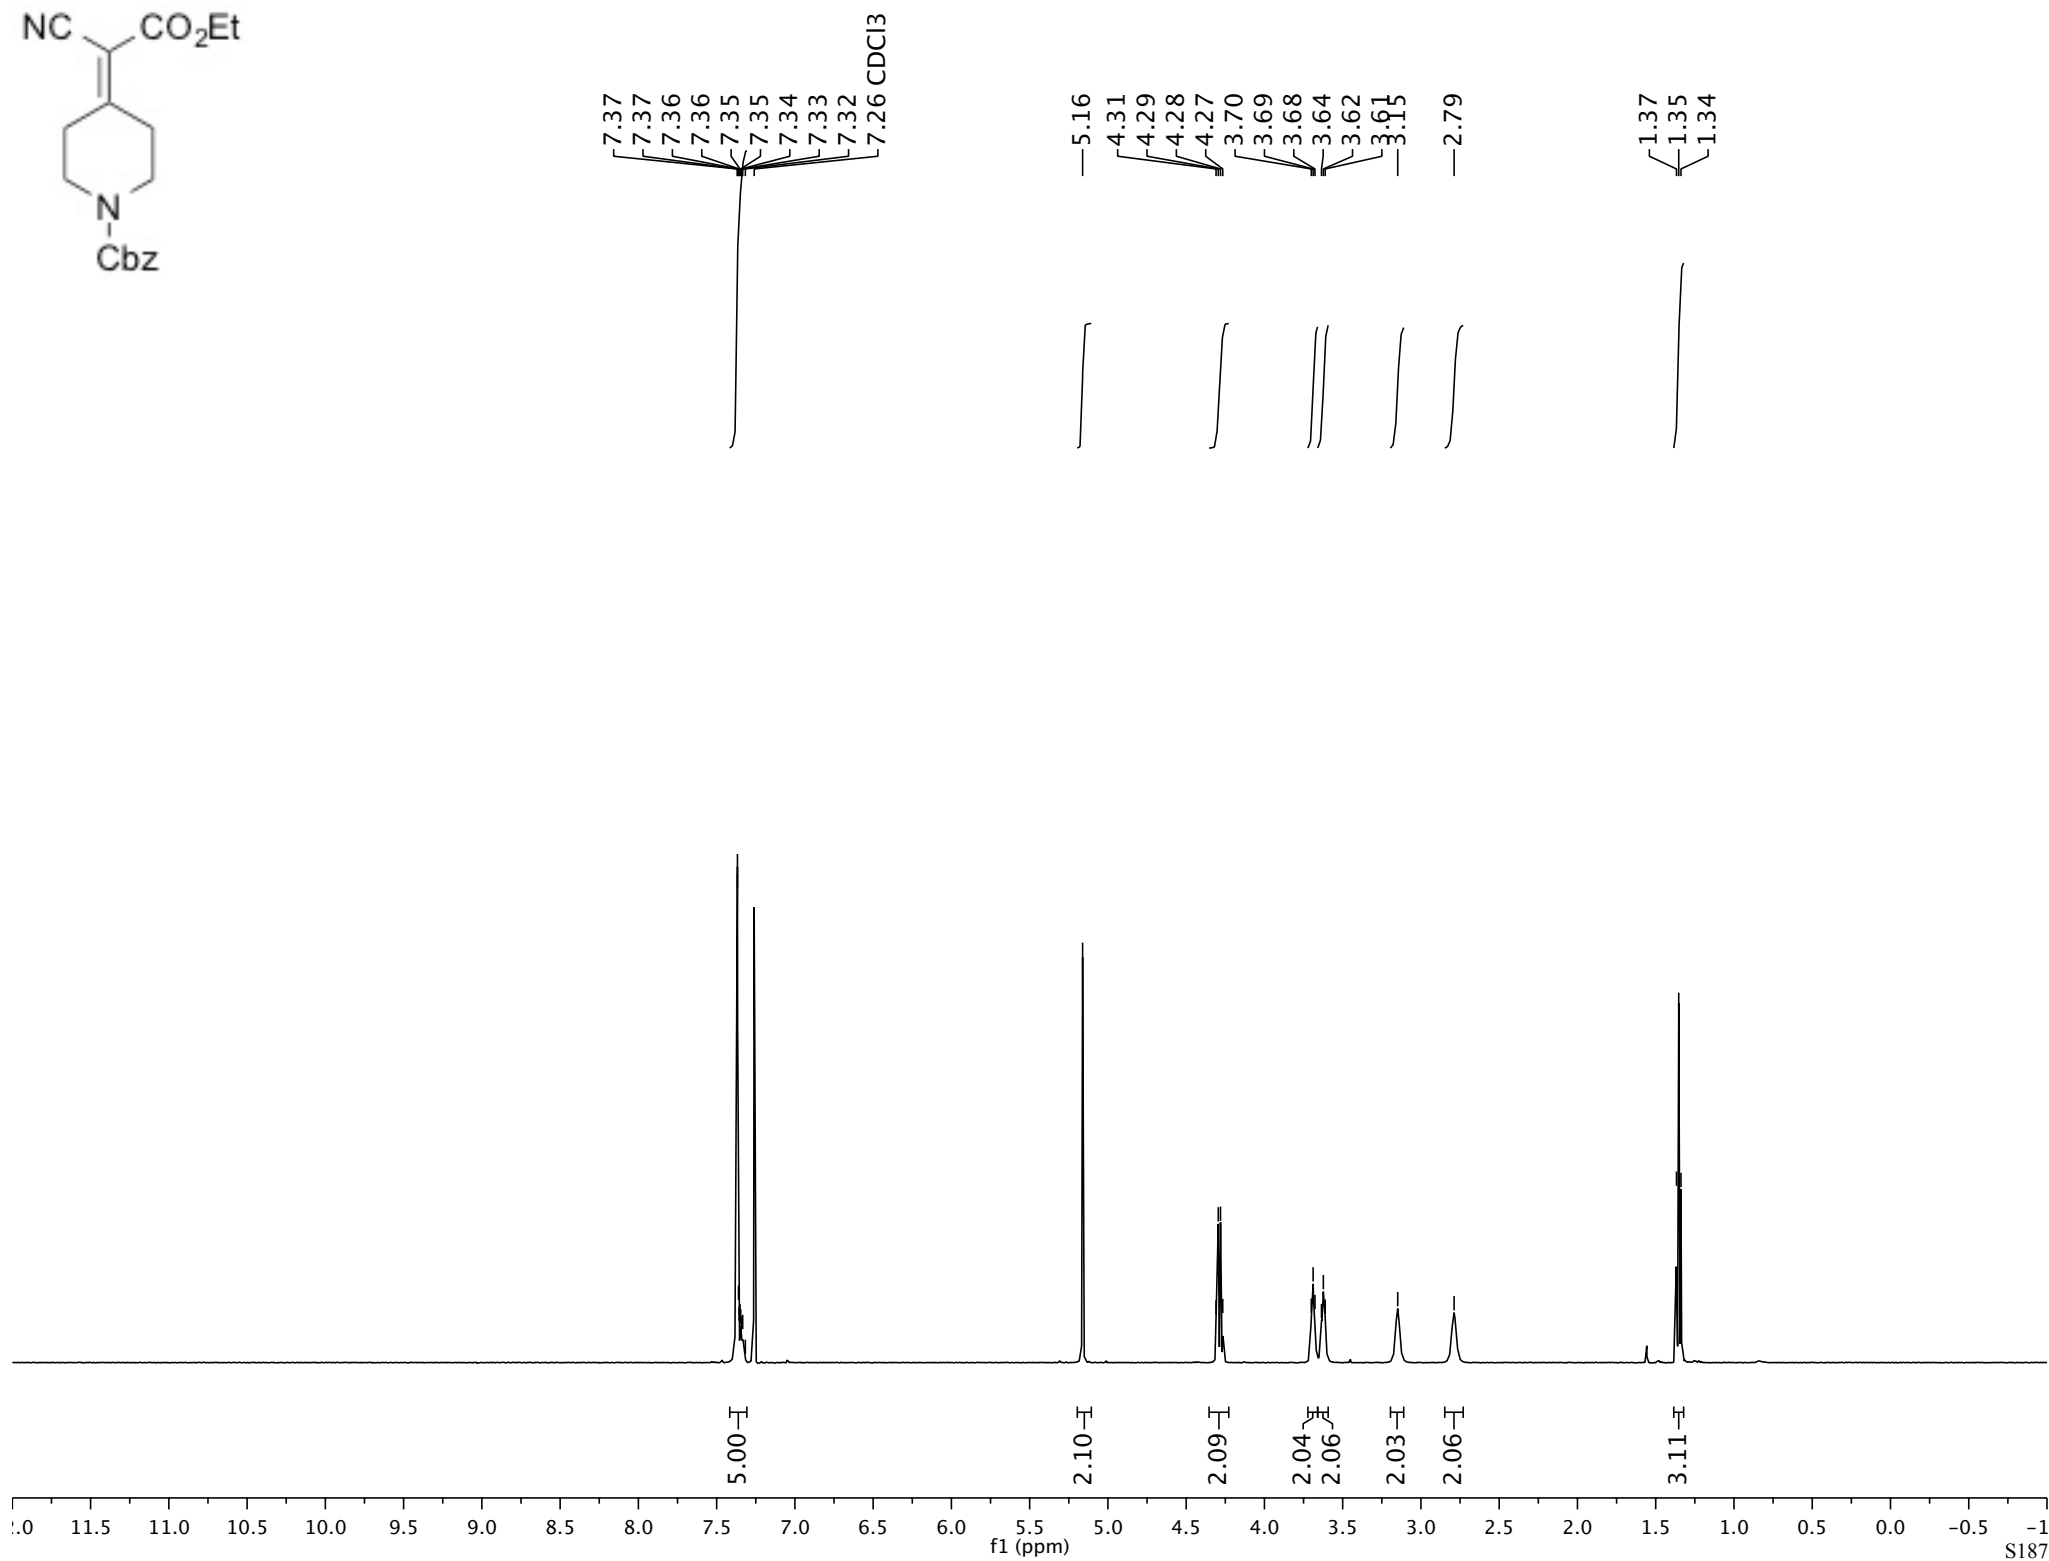

| Parameter              | Value          |
|------------------------|----------------|
| Origin                 | Varian         |
| Spectrometer           | inova          |
| Solvent                | CDCl3          |
| Temperature            | 20.0           |
| Pulse Sequence         | s2pul          |
| Experiment             | 1D             |
| Probe                  | QUADG          |
| Number of Scans        | 16             |
| Receiver Gain          | 56             |
| Relaxation Delay       | 10.0000        |
| Pulse Width            | 0.0000         |
| Acquisition Time       | 4.0960         |
| Spectrometer Frequency | 499.43         |
| Spectral Width         | 8000.0         |
| Lowest Frequency       | -1509.2        |
| Nucleus                | <sup>1</sup> H |
| Acquired Size          | 32768          |
| Spectral Size          | 65536          |

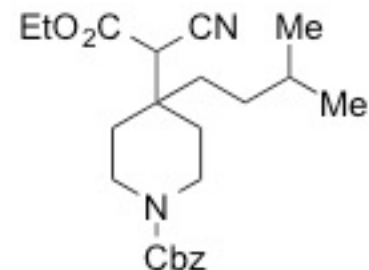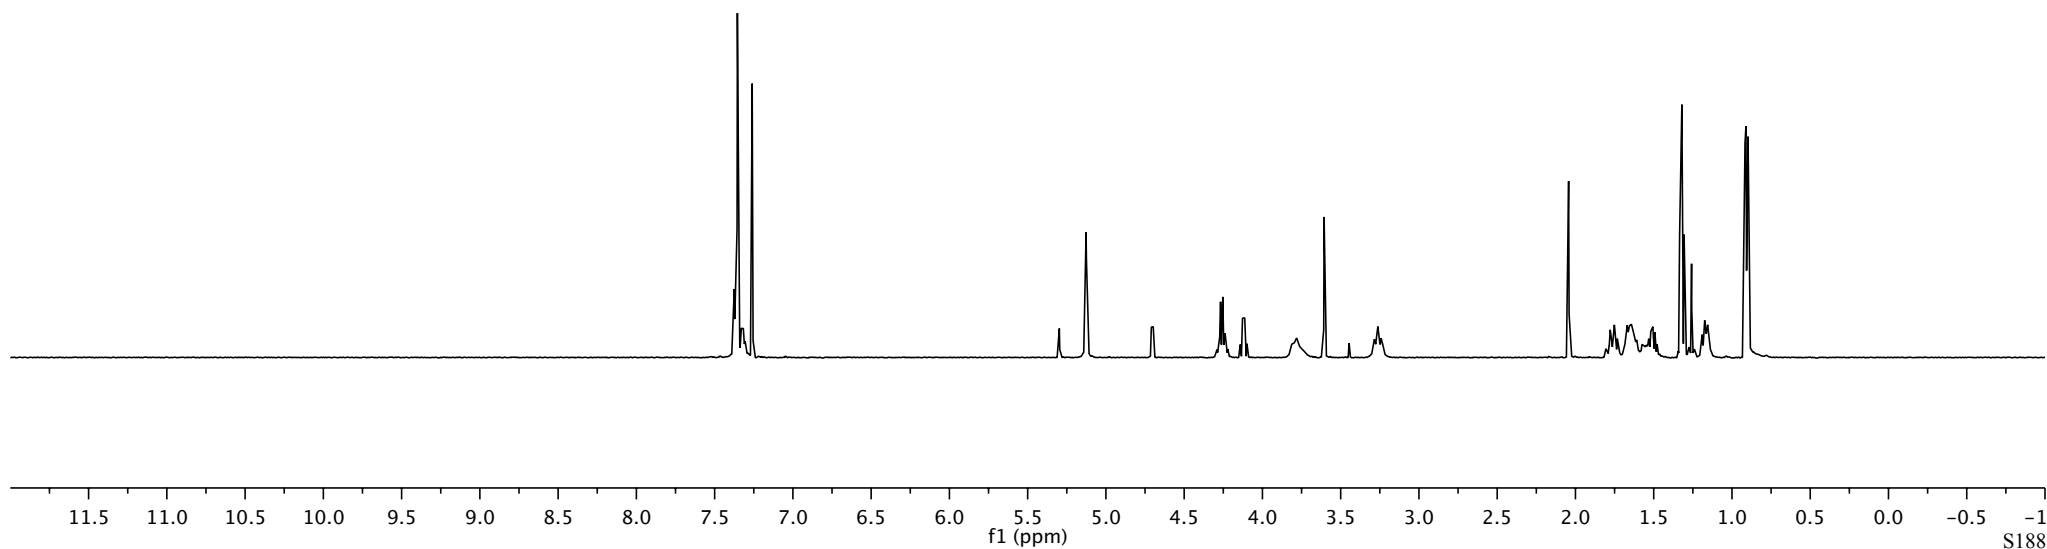

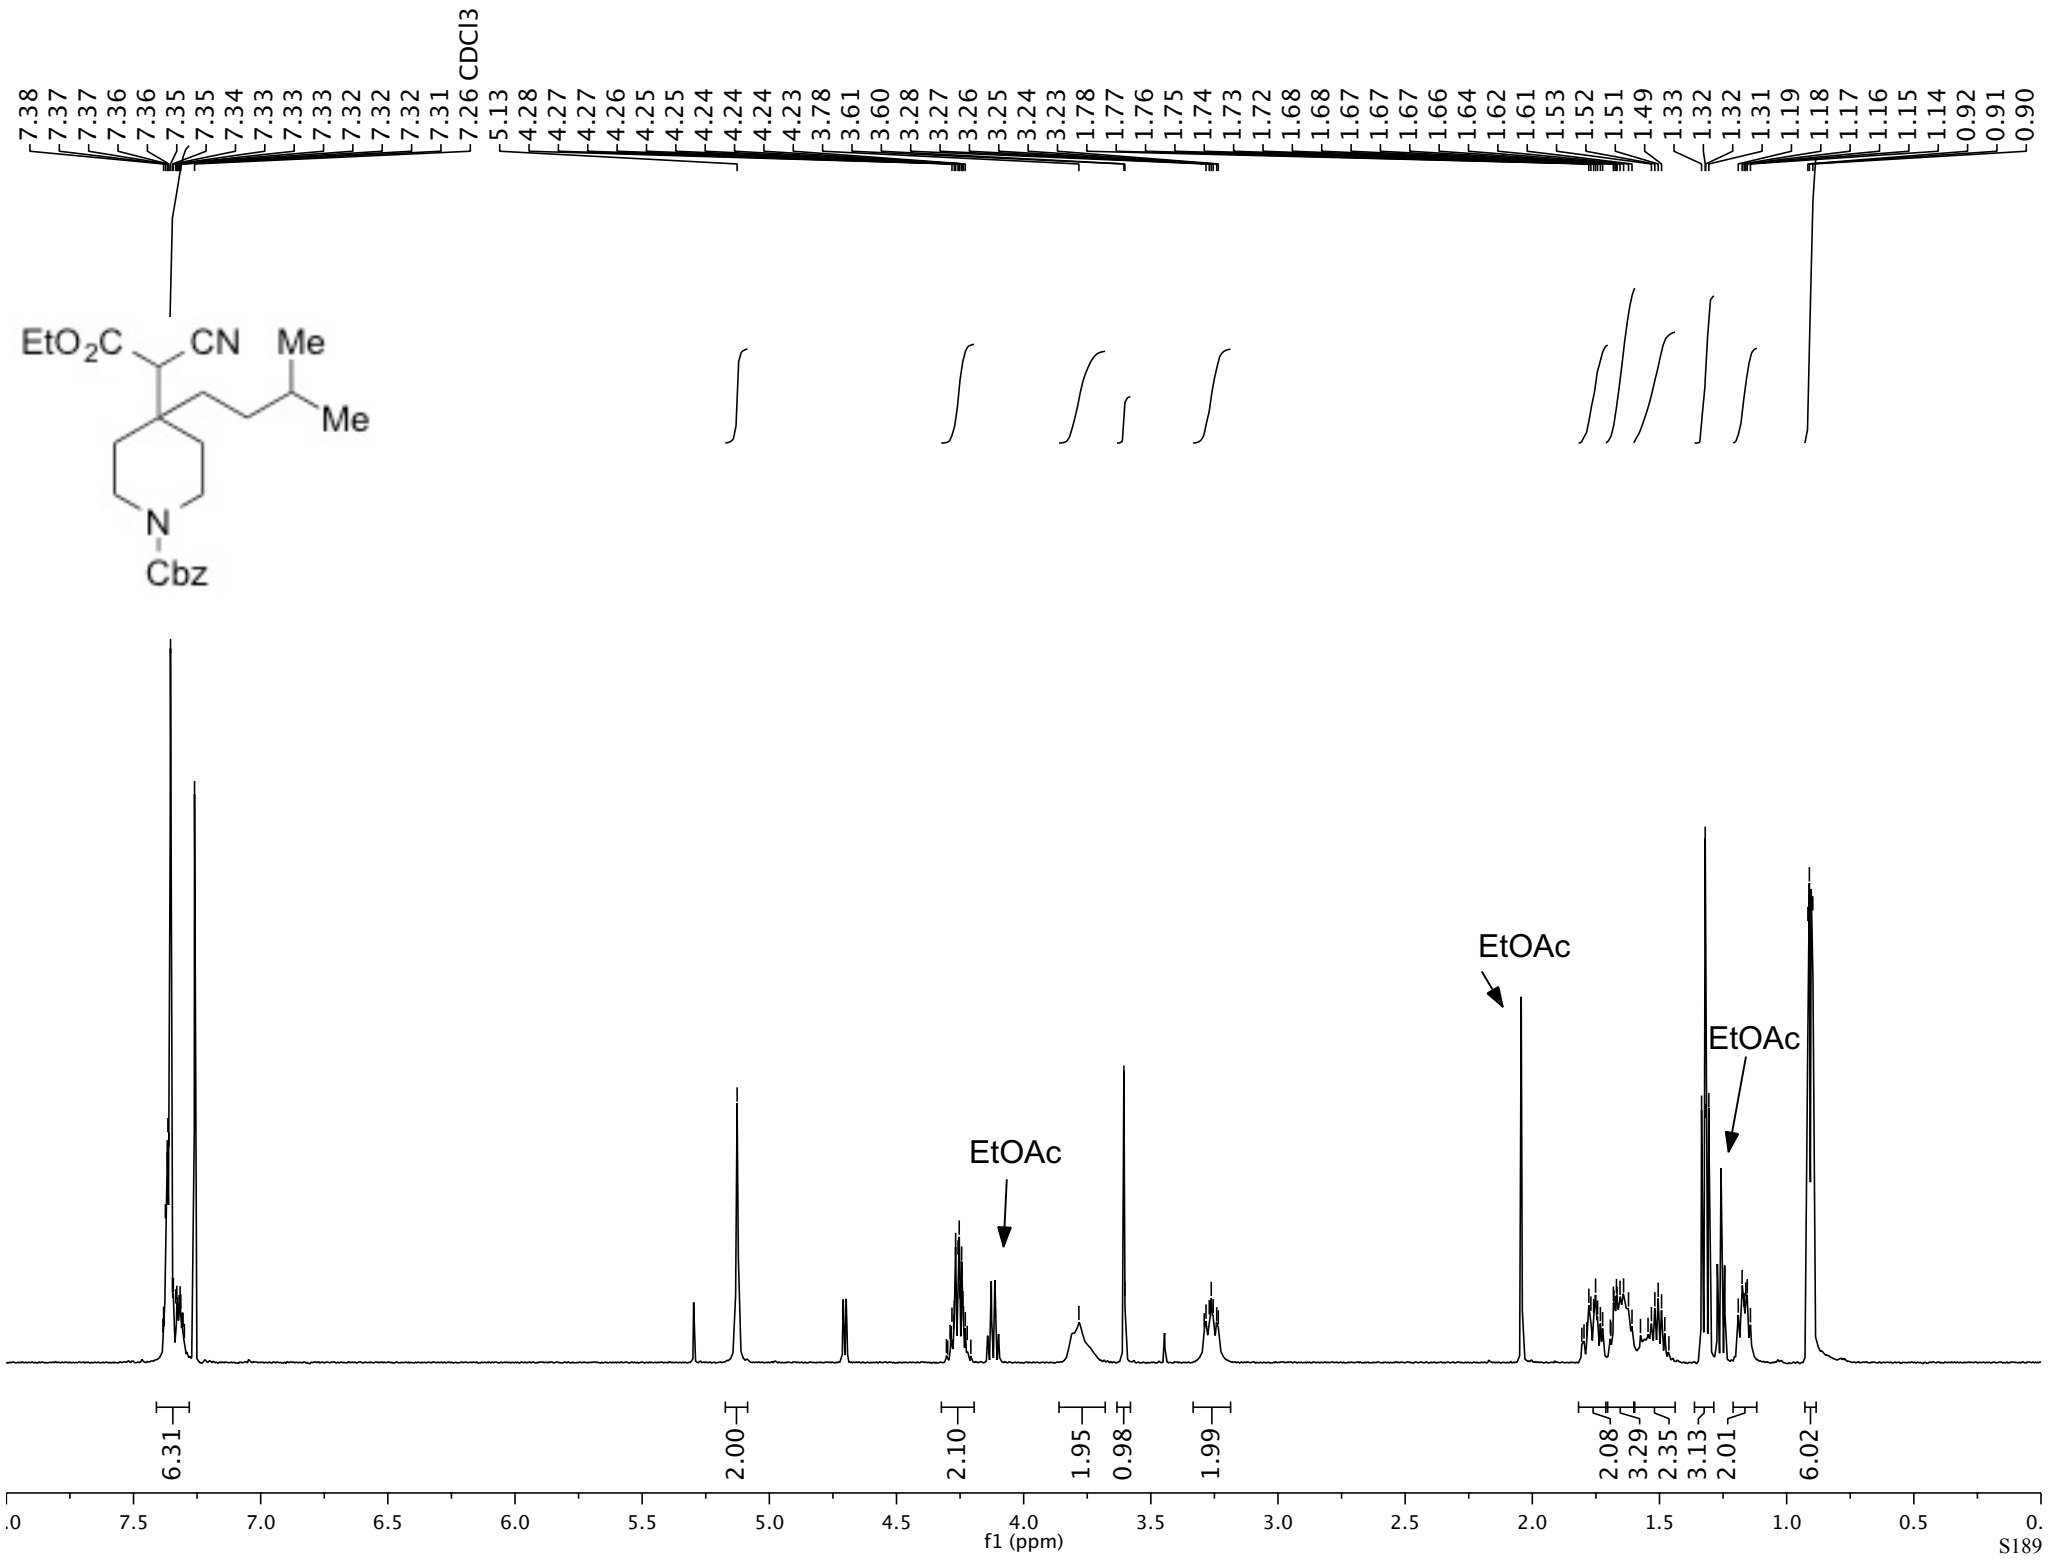

| Parameter              | Value          |
|------------------------|----------------|
| Origin                 | Varian         |
| Spectrometer           | inova          |
| Solvent                | CDCl3          |
| Temperature            | 20.0           |
| Pulse Sequence         | s2pul          |
| Experiment             | 1D             |
| Probe                  | QUADG          |
| Number of Scans        | 16             |
| Receiver Gain          | 56             |
| Relaxation Delay       | 10.0000        |
| Pulse Width            | 0.0000         |
| Acquisition Time       | 4.0960         |
| Spectrometer Frequency | 499.43         |
| Spectral Width         | 8000.0         |
| Lowest Frequency       | -1509.2        |
| Nucleus                | <sup>1</sup> H |
| Acquired Size          | 32768          |
| Spectral Size          | 65536          |

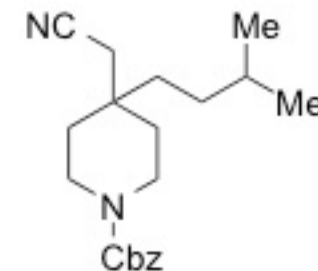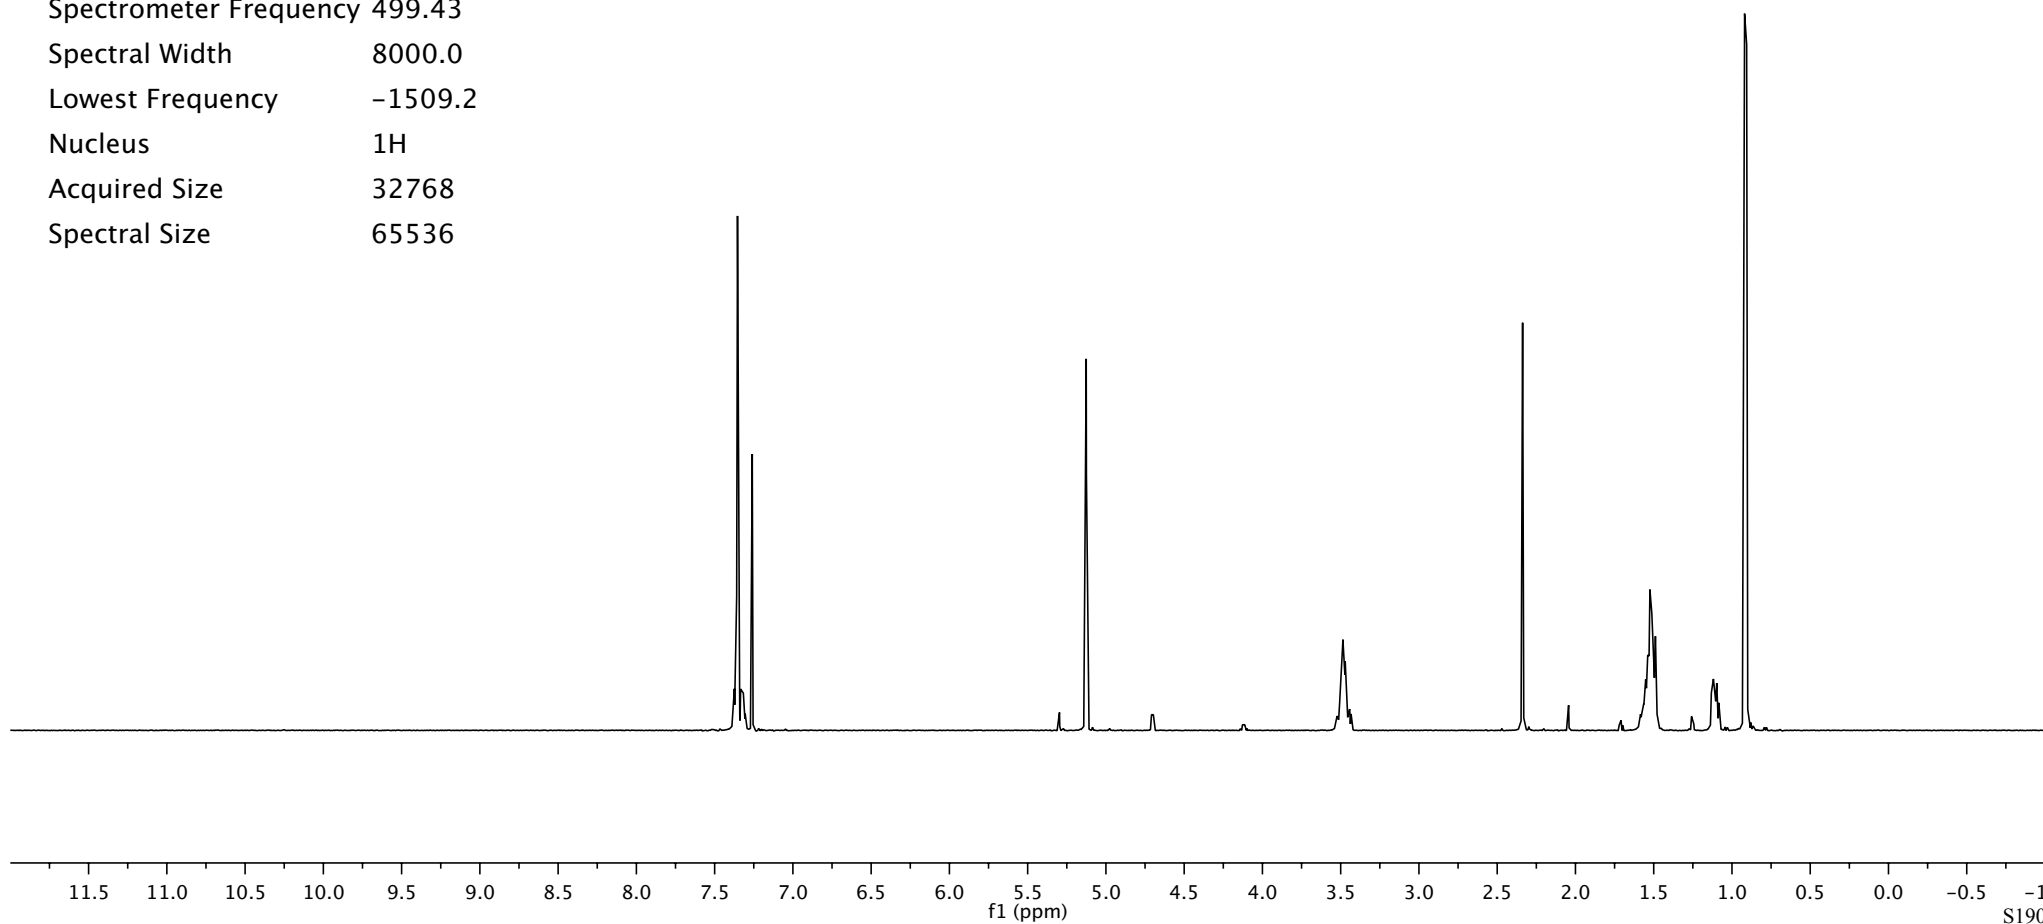

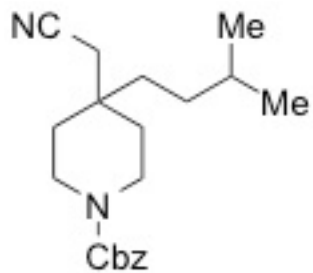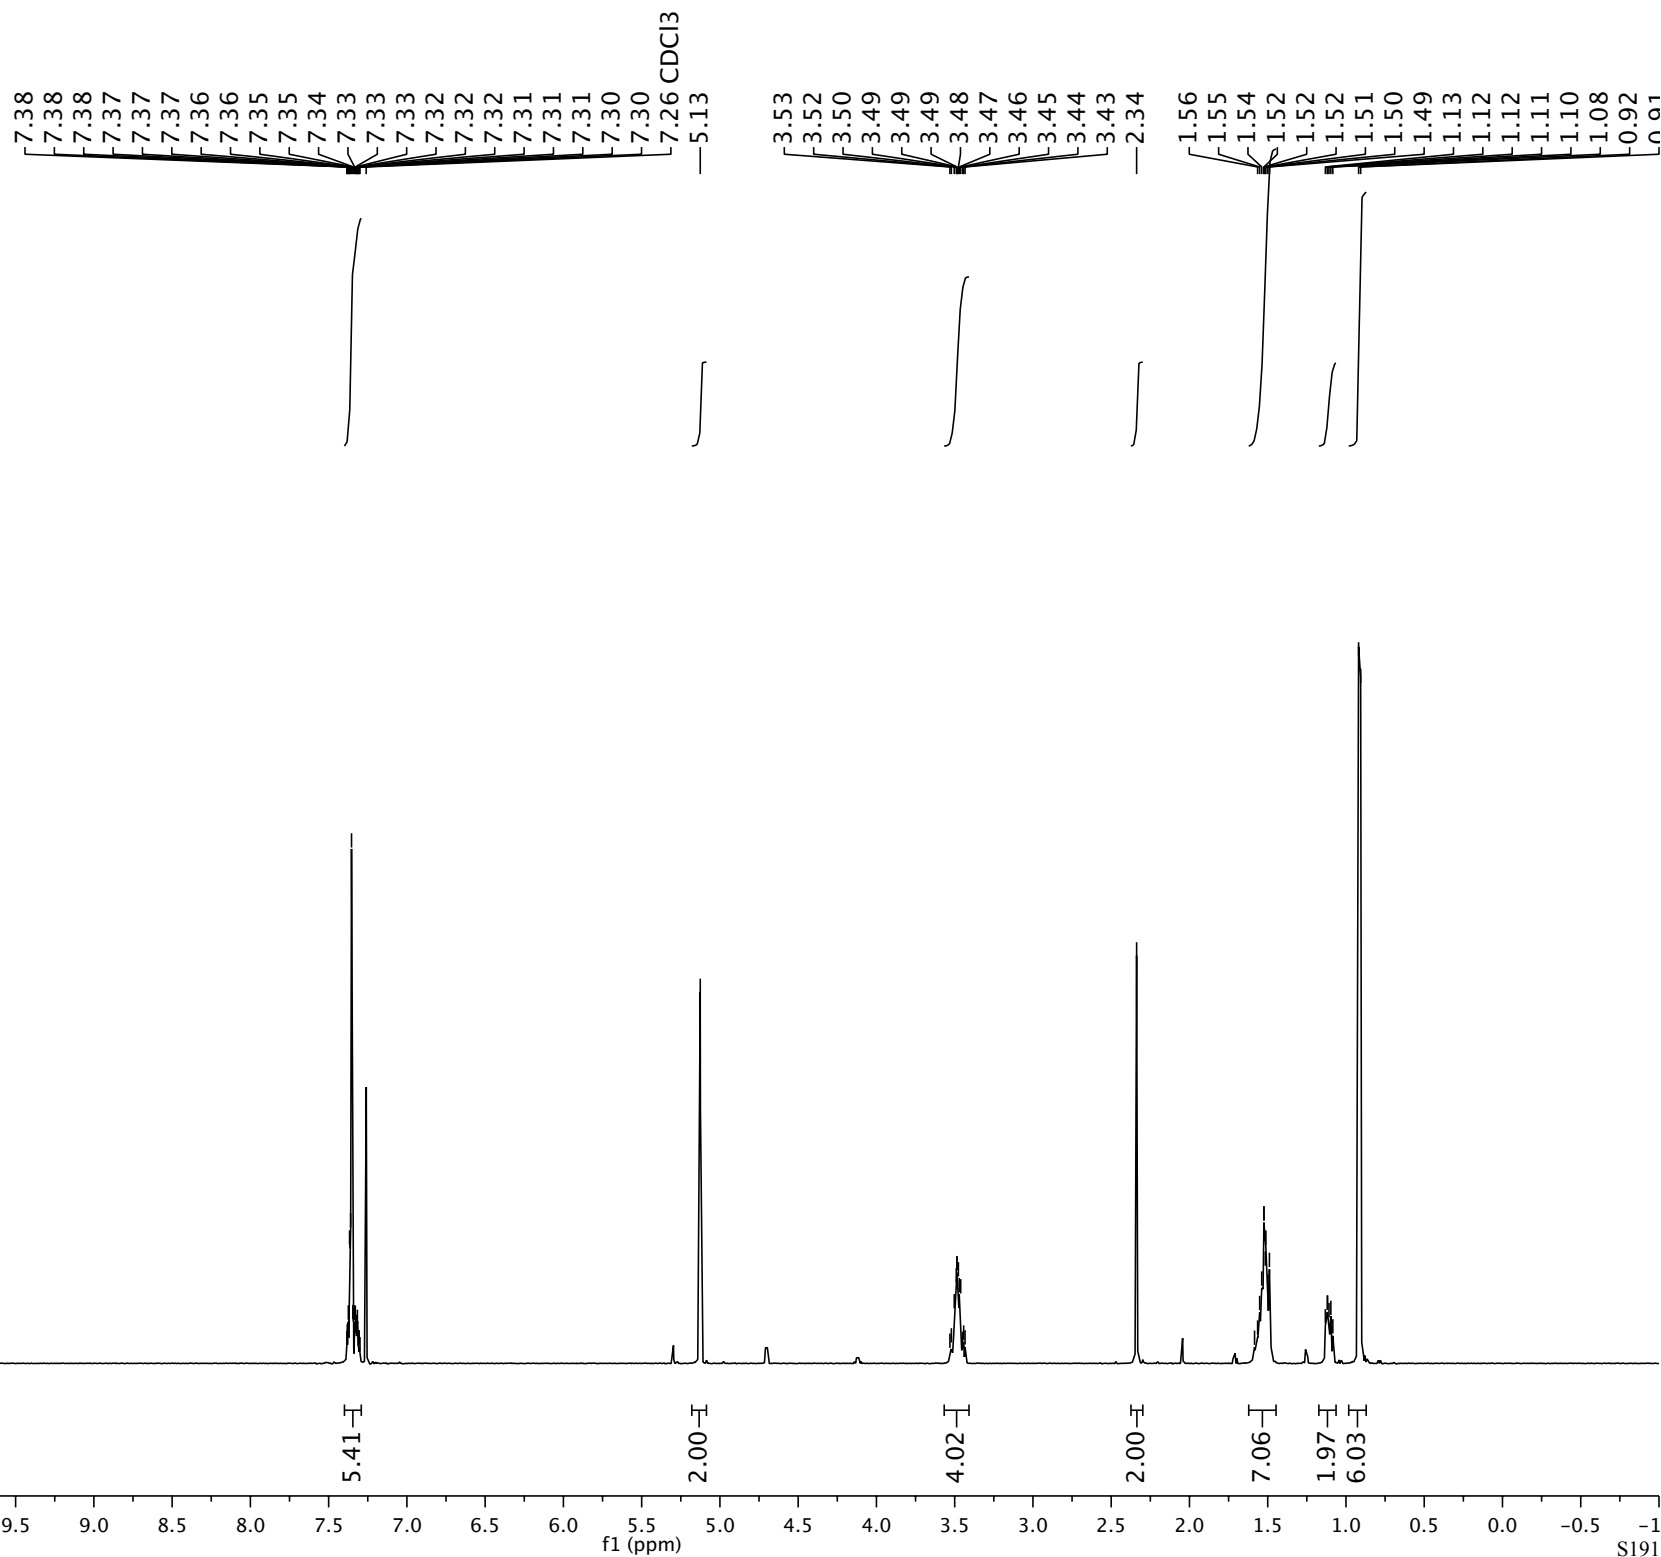



| Parameter              | Value          |
|------------------------|----------------|
| Origin                 | Varian         |
| Spectrometer           | inova          |
| Solvent                | CDCl3          |
| Temperature            | 25.0           |
| Pulse Sequence         | s2pul          |
| Experiment             | 1D             |
| Probe                  | QUAD           |
| Number of Scans        | 8              |
| Receiver Gain          | 41             |
| Relaxation Delay       | 0.0000         |
| Pulse Width            | 0.0000         |
| Acquisition Time       | 4.6645         |
| Spectrometer Frequency | 499.69         |
| Spectral Width         | 7024.9         |
| Lowest Frequency       | -1021.9        |
| Nucleus                | <sup>1</sup> H |
| Acquired Size          | 32768          |
| Spectral Size          | 65536          |

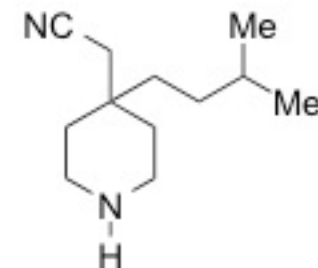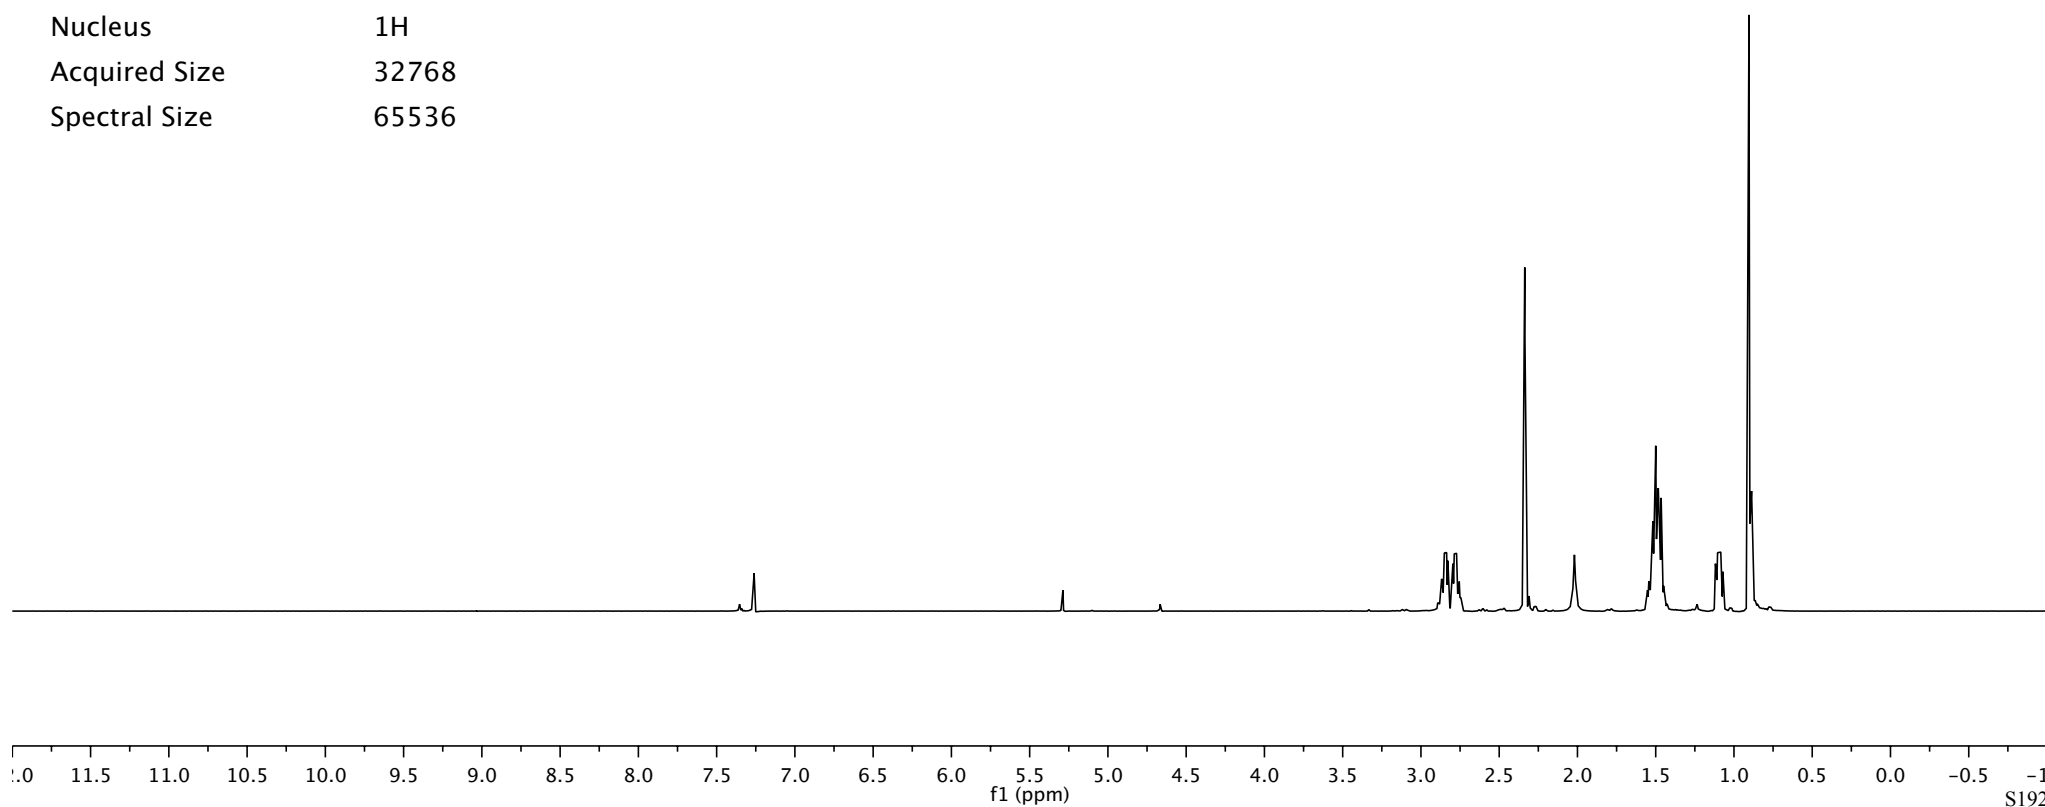

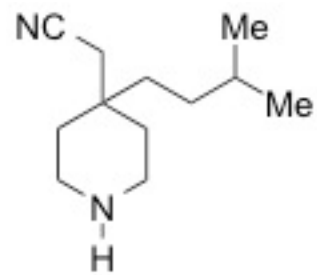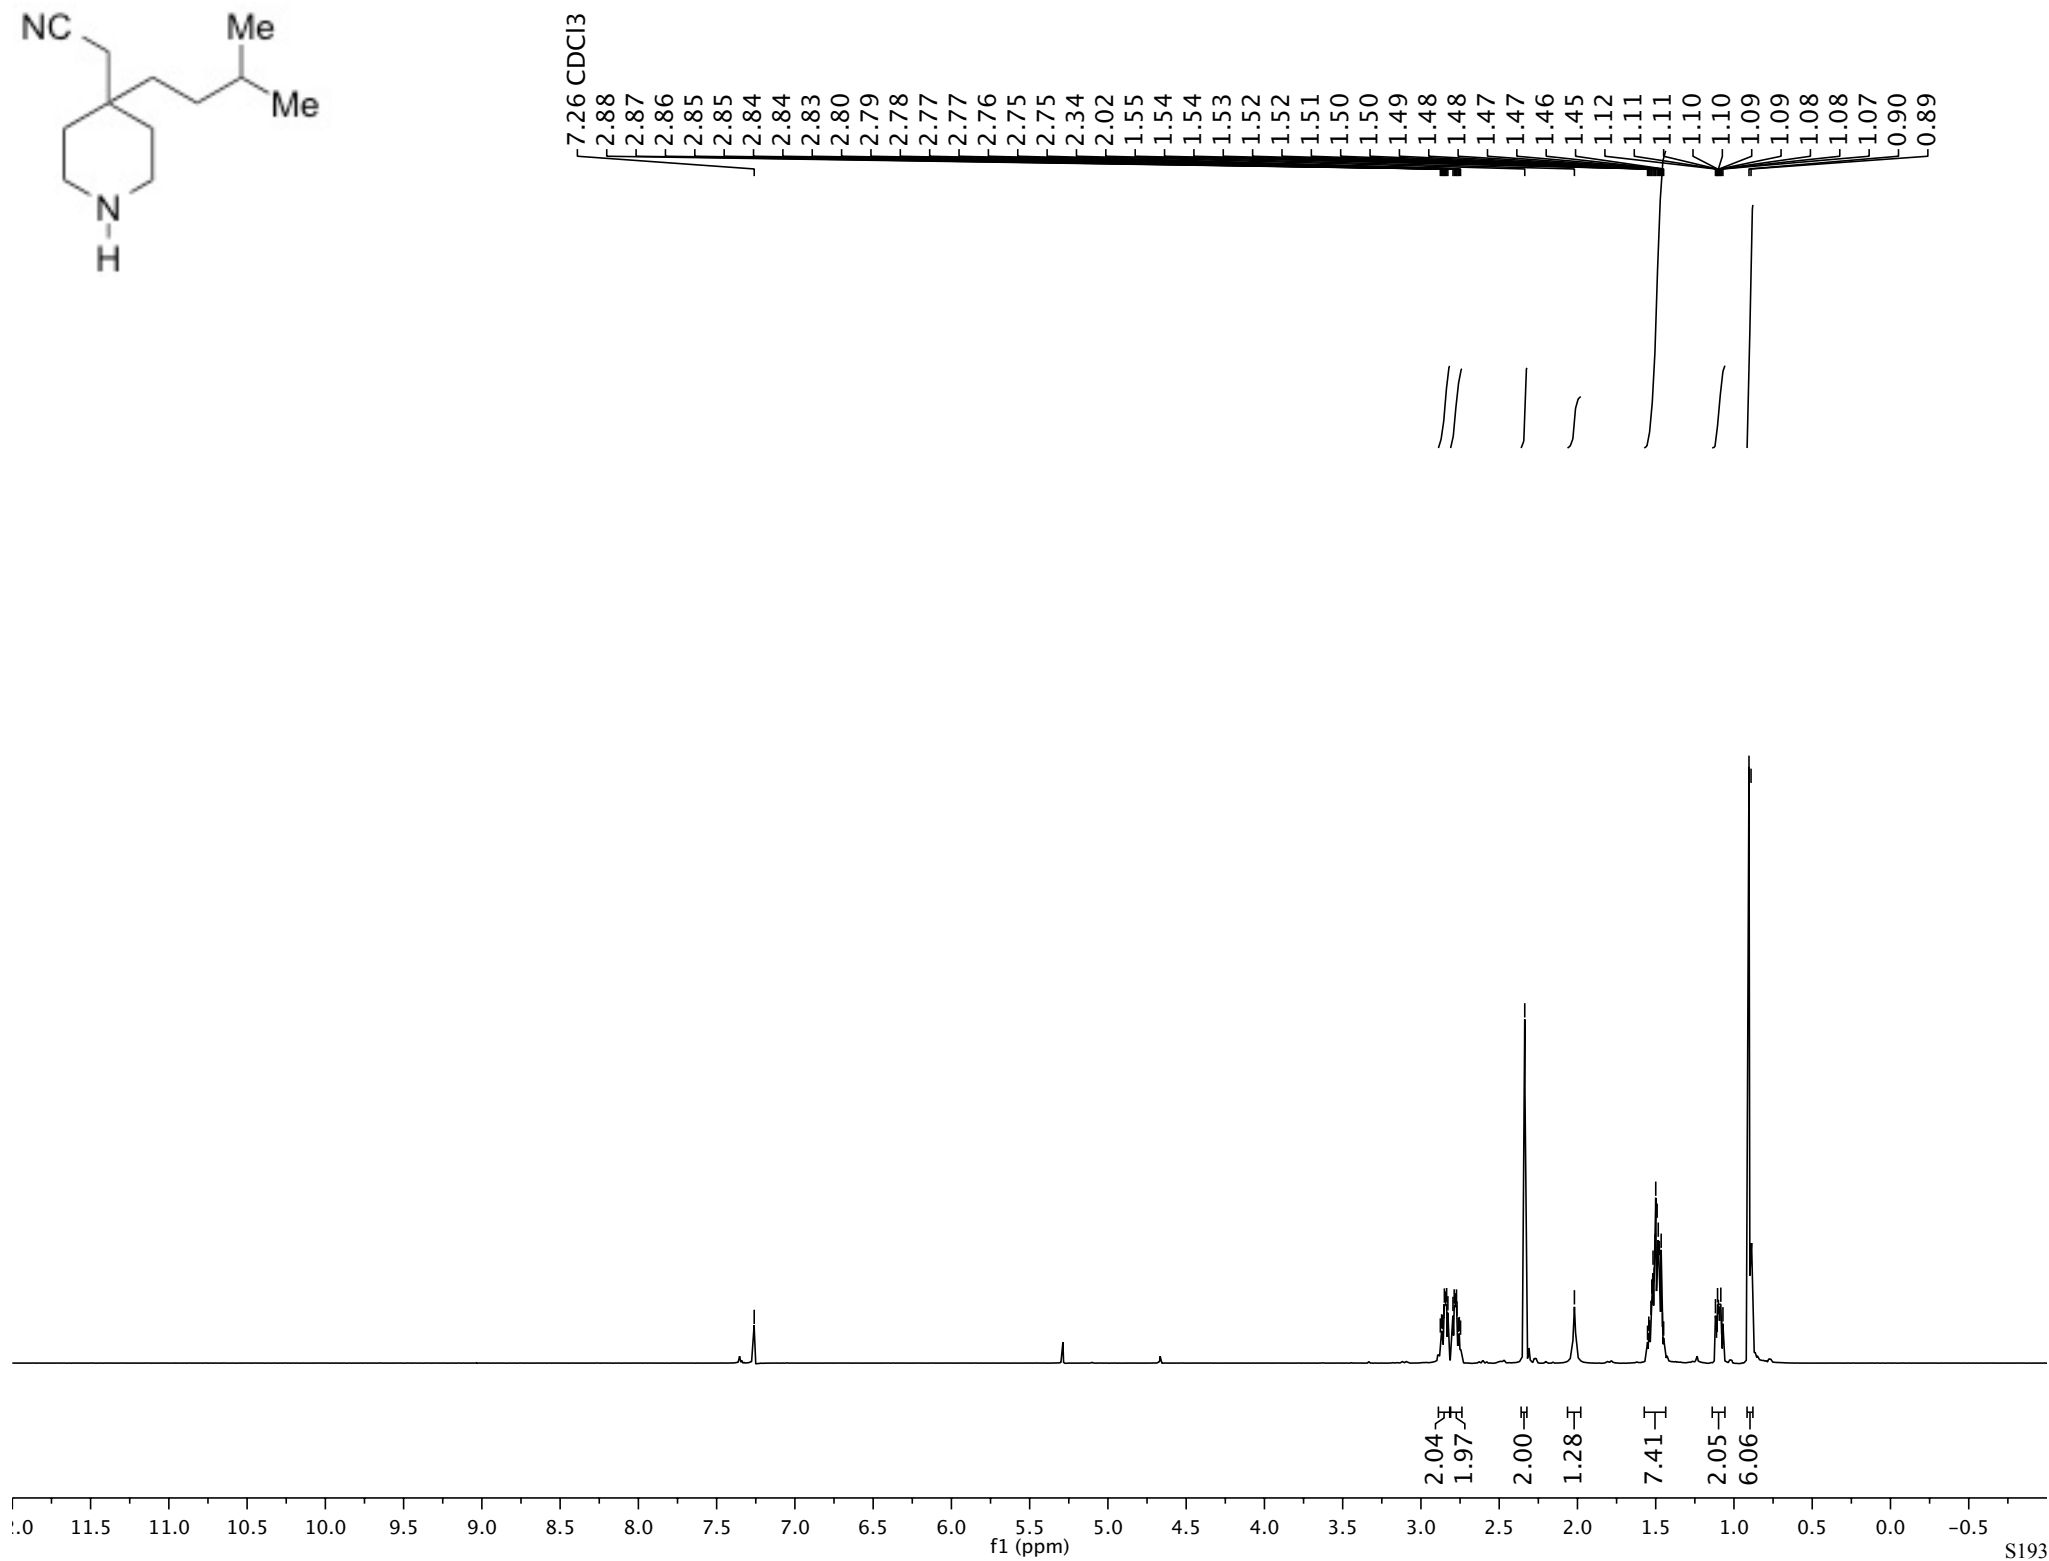

| Parameter              | Value   |
|------------------------|---------|
| Origin                 | Varian  |
| Spectrometer           | inova   |
| Solvent                | CDCl3   |
| Temperature            | 25.0    |
| Pulse Sequence         | s2pul   |
| Experiment             | 1D      |
| Probe                  | QUAD    |
| Number of Scans        | 128     |
| Receiver Gain          | 60      |
| Relaxation Delay       | 1.0000  |
| Pulse Width            | 0.0000  |
| Acquisition Time       | 1.0863  |
| Spectrometer Frequency | 125.66  |
| Spectral Width         | 30165.9 |
| Lowest Frequency       | -1277.6 |
| Nucleus                | 13C     |
| Acquired Size          | 32768   |
| Spectral Size          | 65536   |

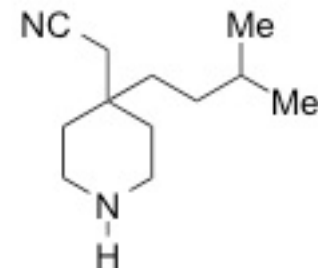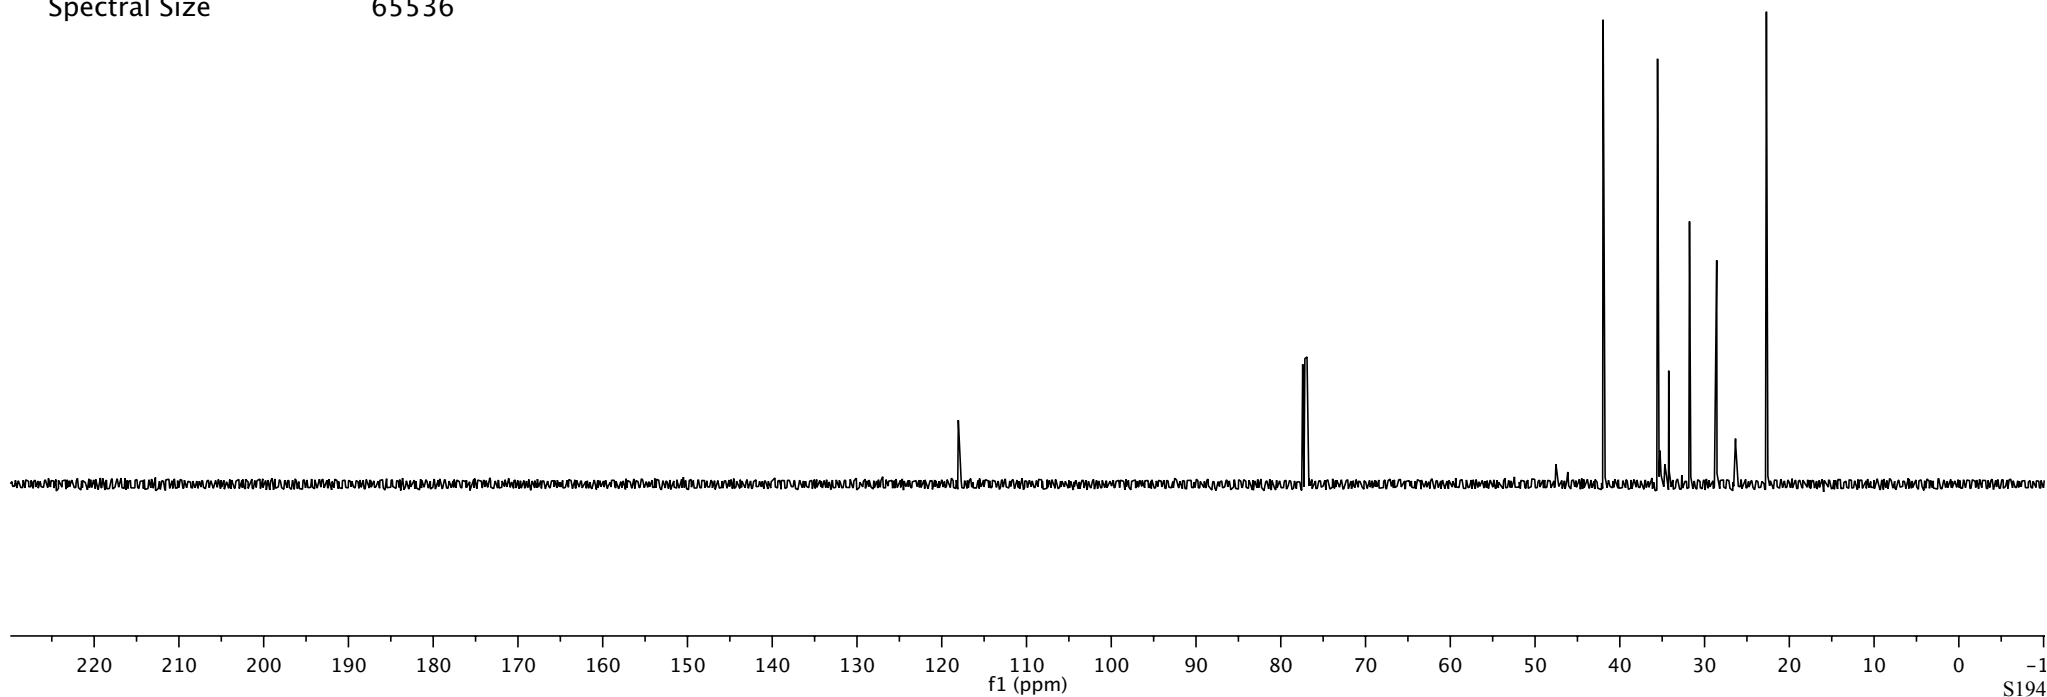

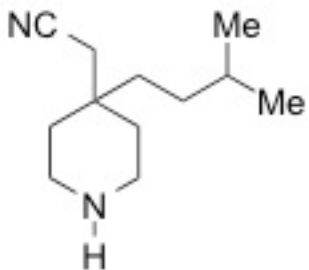

—118.04

—77.16 CDCl<sub>3</sub>

41.97  
35.54  
35.26  
34.23  
31.78  
28.57  
26.34  
22.70

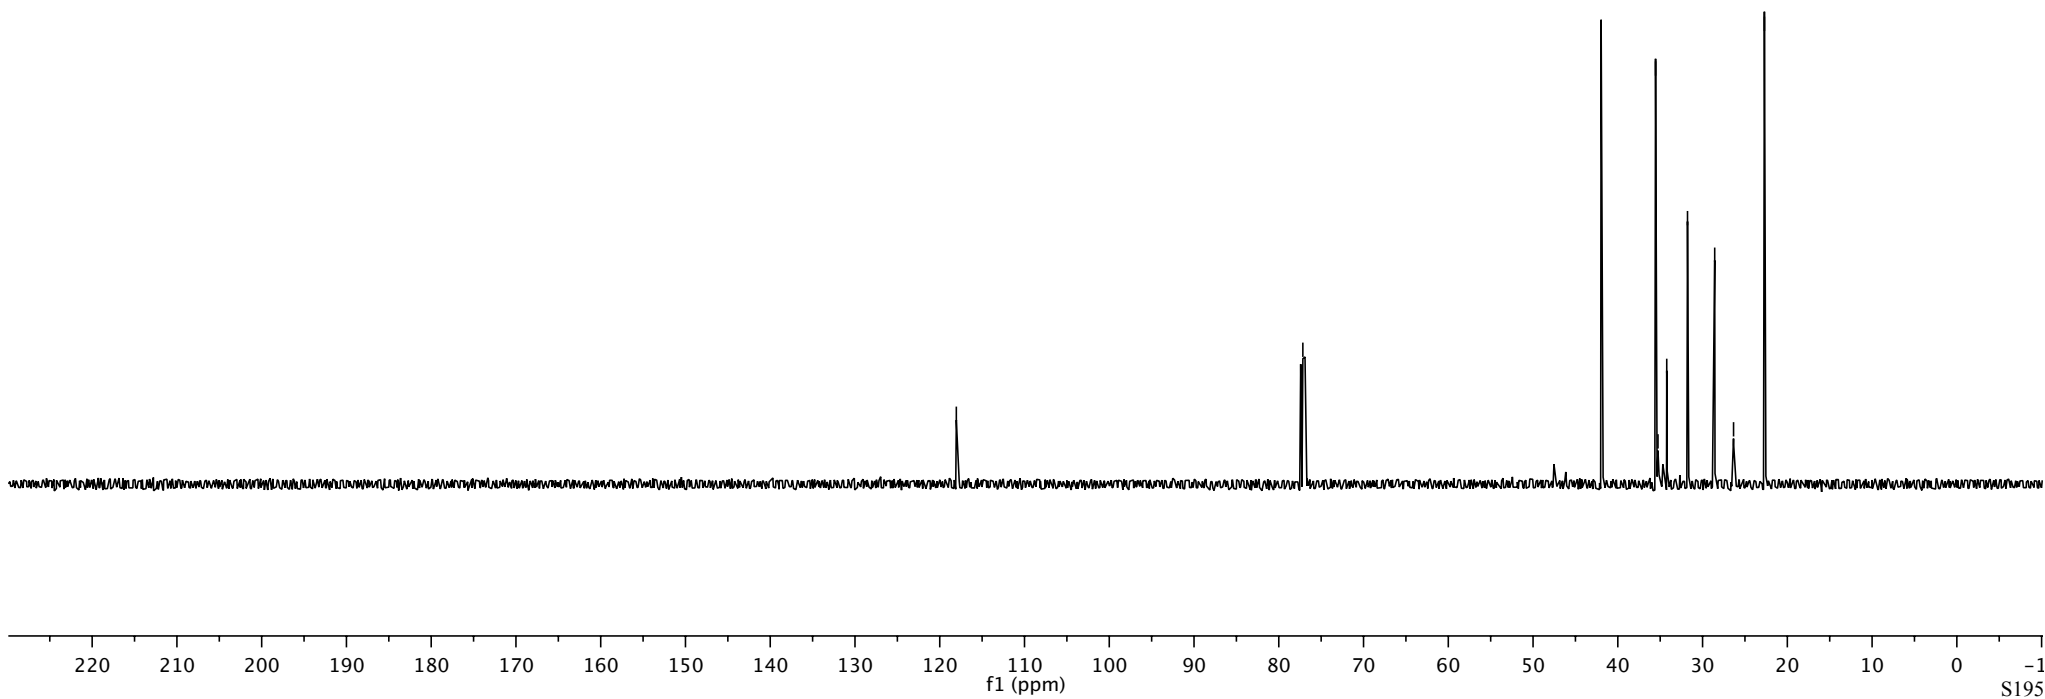

| Parameter              | Value             |
|------------------------|-------------------|
| Origin                 | Varian            |
| Spectrometer           | inova             |
| Solvent                | CDCl <sub>3</sub> |
| Temperature            | 20.0              |
| Pulse Sequence         | s2pul             |
| Experiment             | 1D                |
| Probe                  | QUAD              |
| Number of Scans        | 8                 |
| Receiver Gain          | 60                |
| Relaxation Delay       | 0.0000            |
| Pulse Width            | 0.0000            |
| Acquisition Time       | 4.6645            |
| Spectrometer Frequency | 499.69            |
| Spectral Width         | 7024.9            |
| Lowest Frequency       | -1022.4           |
| Nucleus                | <sup>1</sup> H    |
| Acquired Size          | 32768             |
| Spectral Size          | 65536             |

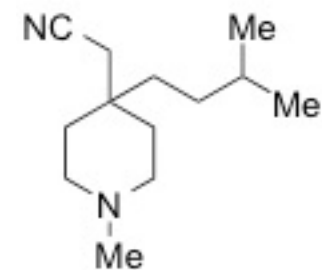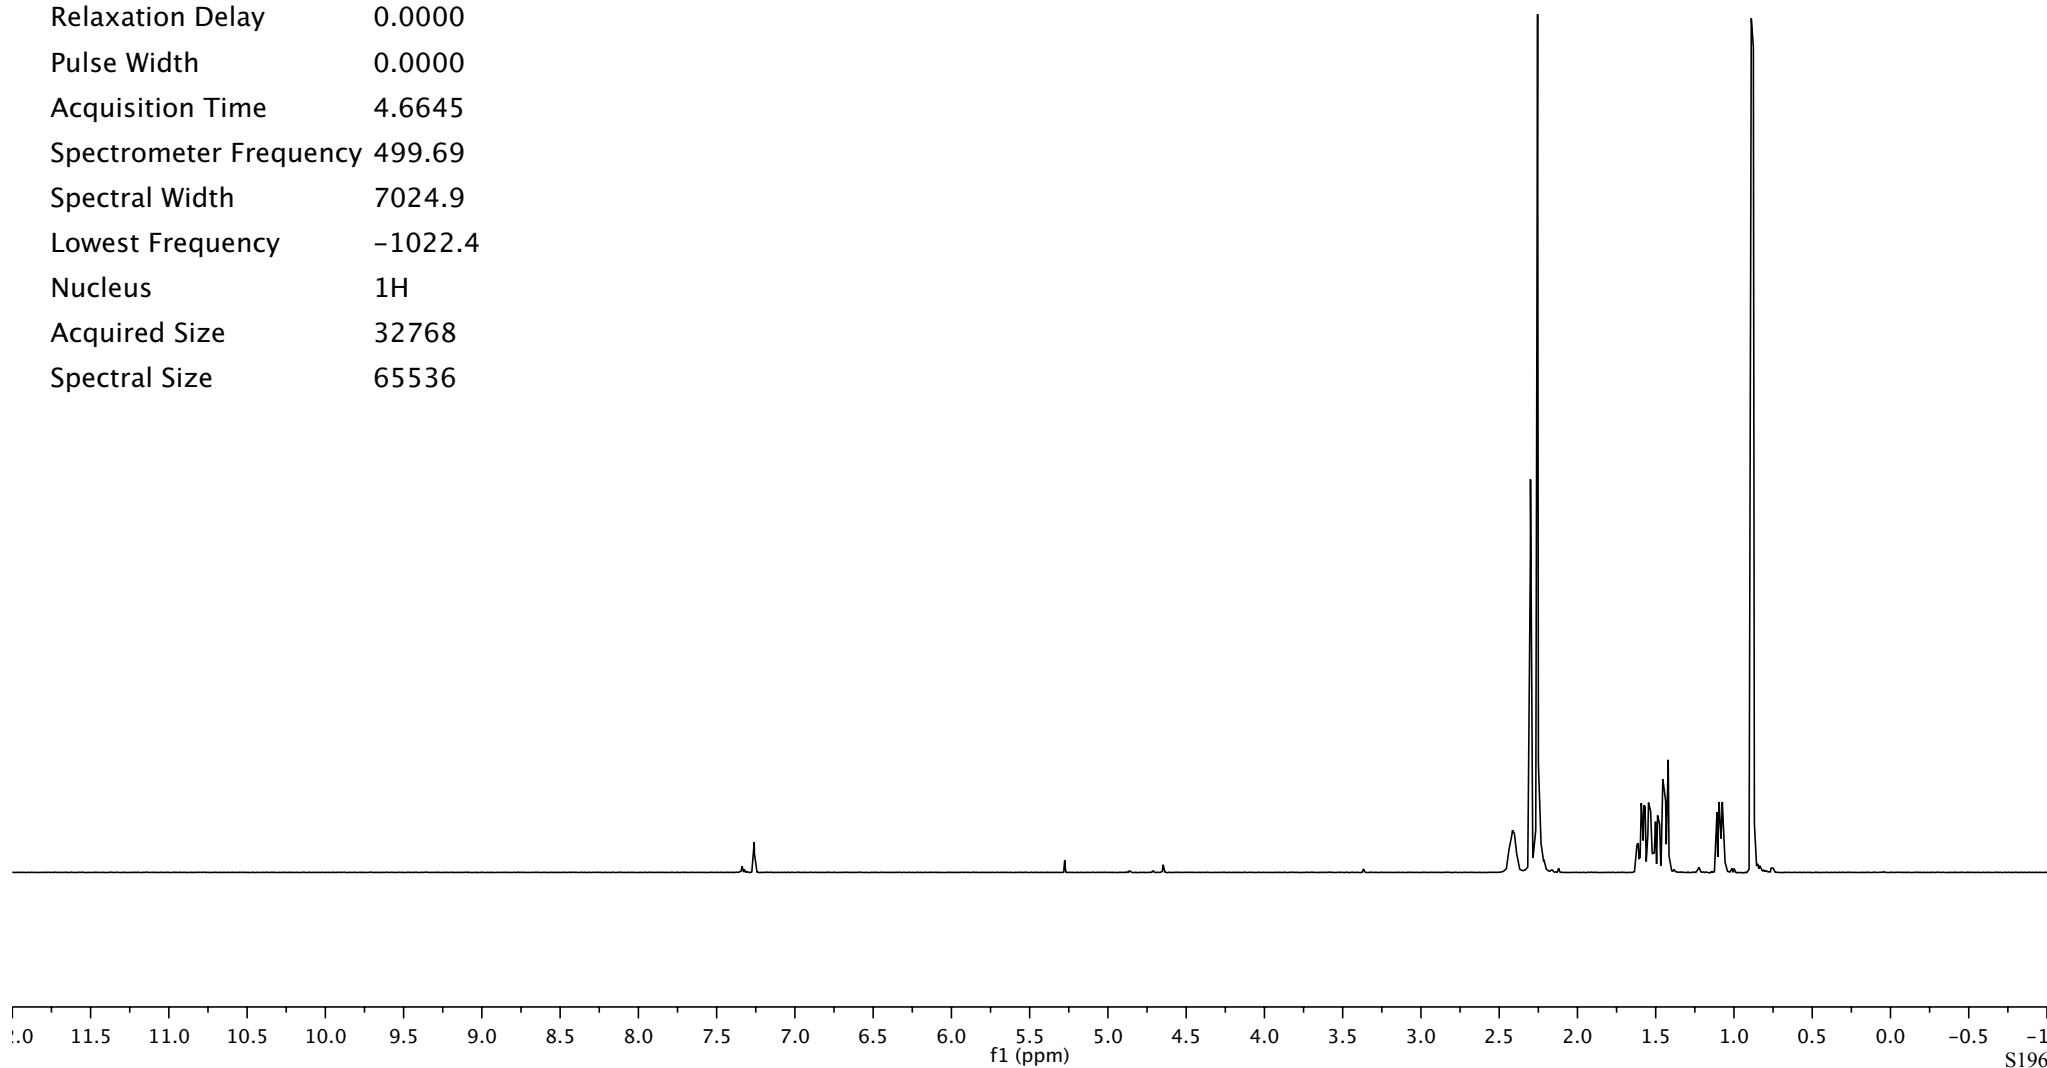

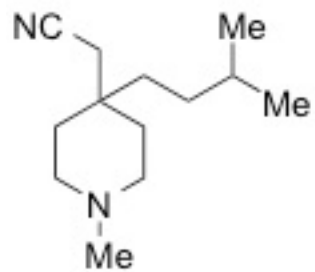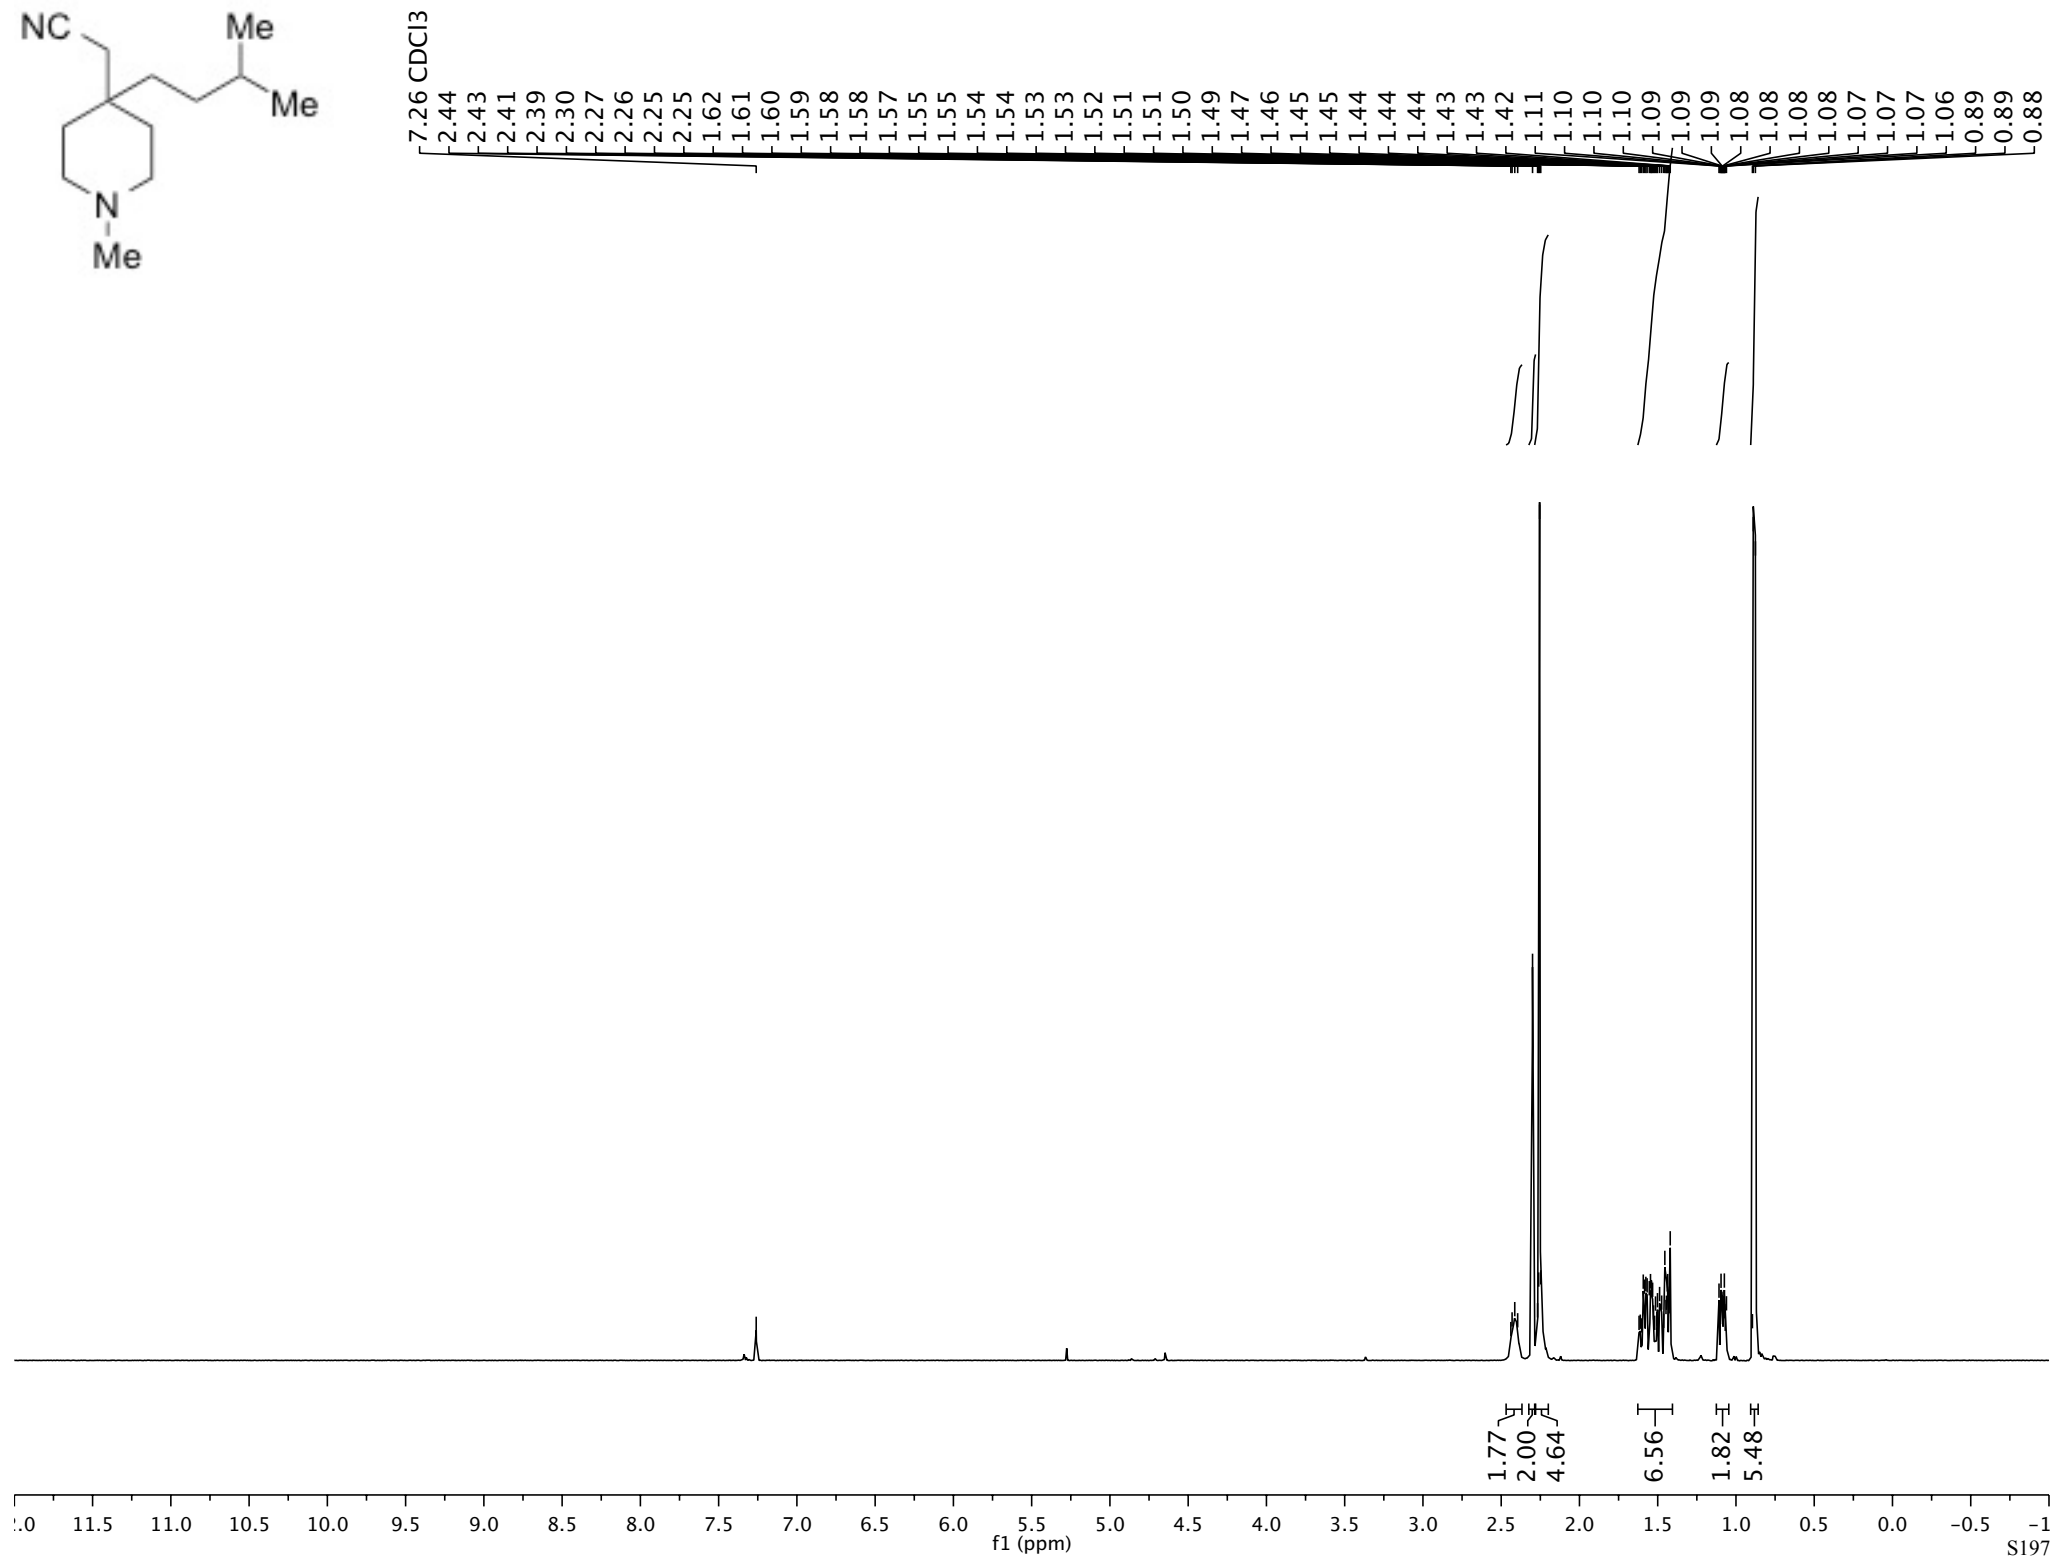

| Parameter              | Value           |
|------------------------|-----------------|
| Origin                 | Varian          |
| Spectrometer           | inova           |
| Solvent                | CDCl3           |
| Temperature            | 20.0            |
| Pulse Sequence         | s2pul           |
| Experiment             | 1D              |
| Probe                  | QUAD            |
| Number of Scans        | 432             |
| Receiver Gain          | 60              |
| Relaxation Delay       | 1.0000          |
| Pulse Width            | 0.0000          |
| Acquisition Time       | 1.0863          |
| Spectrometer Frequency | 125.66          |
| Spectral Width         | 30165.9         |
| Lowest Frequency       | -1278.8         |
| Nucleus                | <sup>13</sup> C |
| Acquired Size          | 32768           |
| Spectral Size          | 65536           |

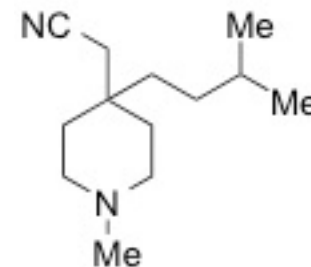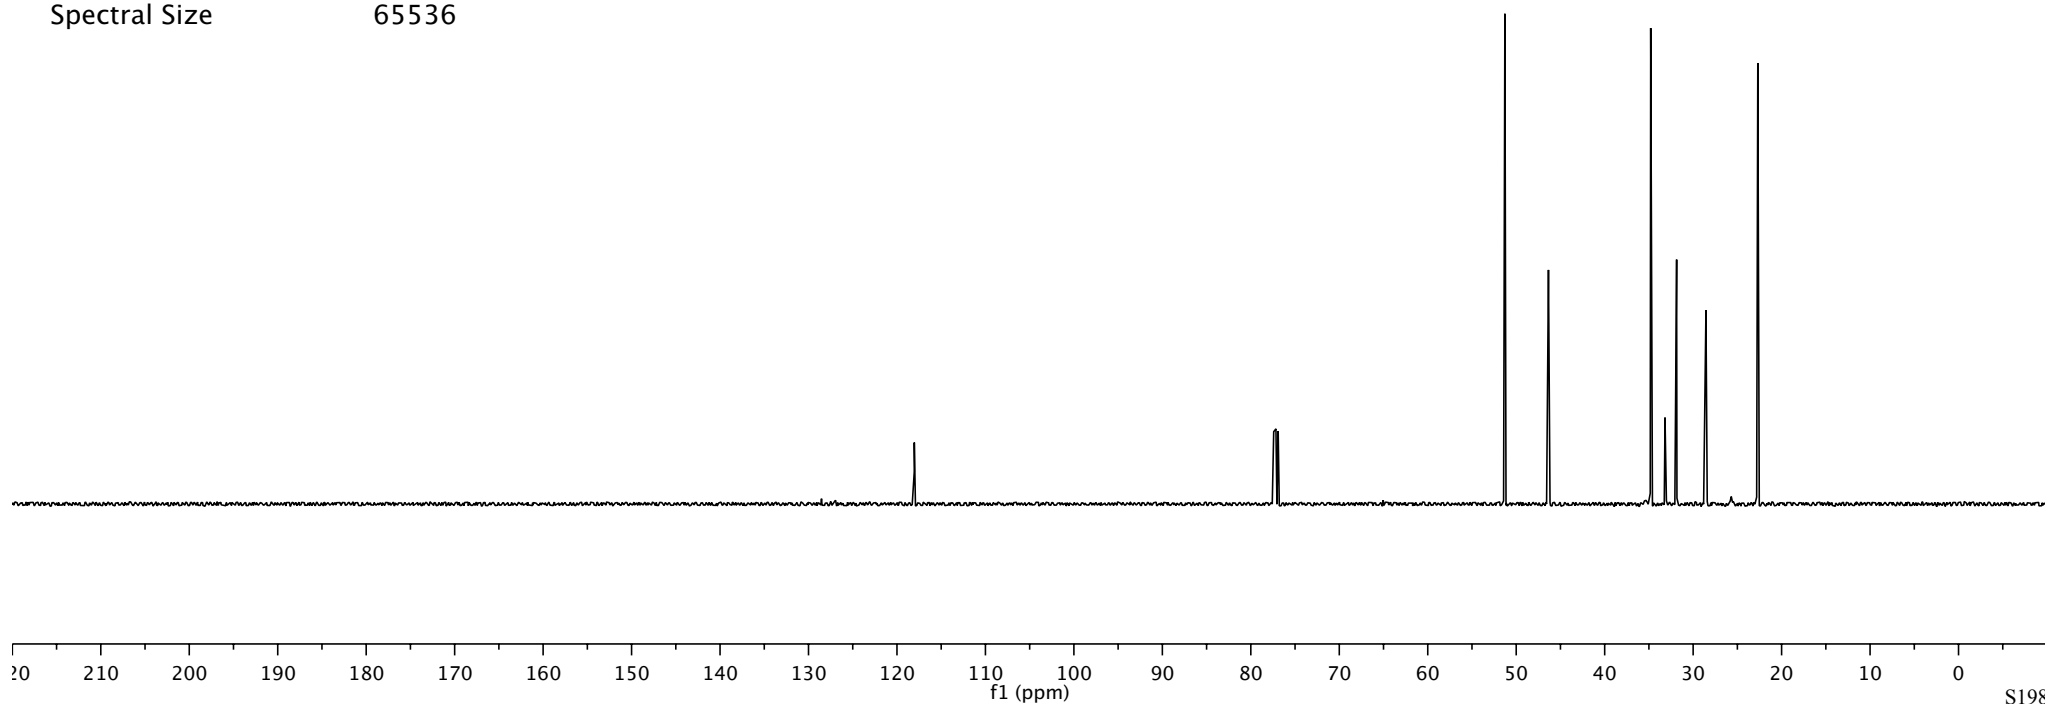

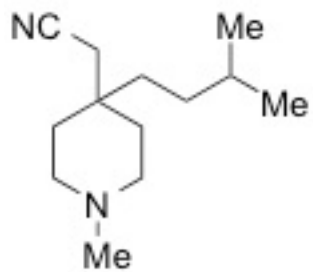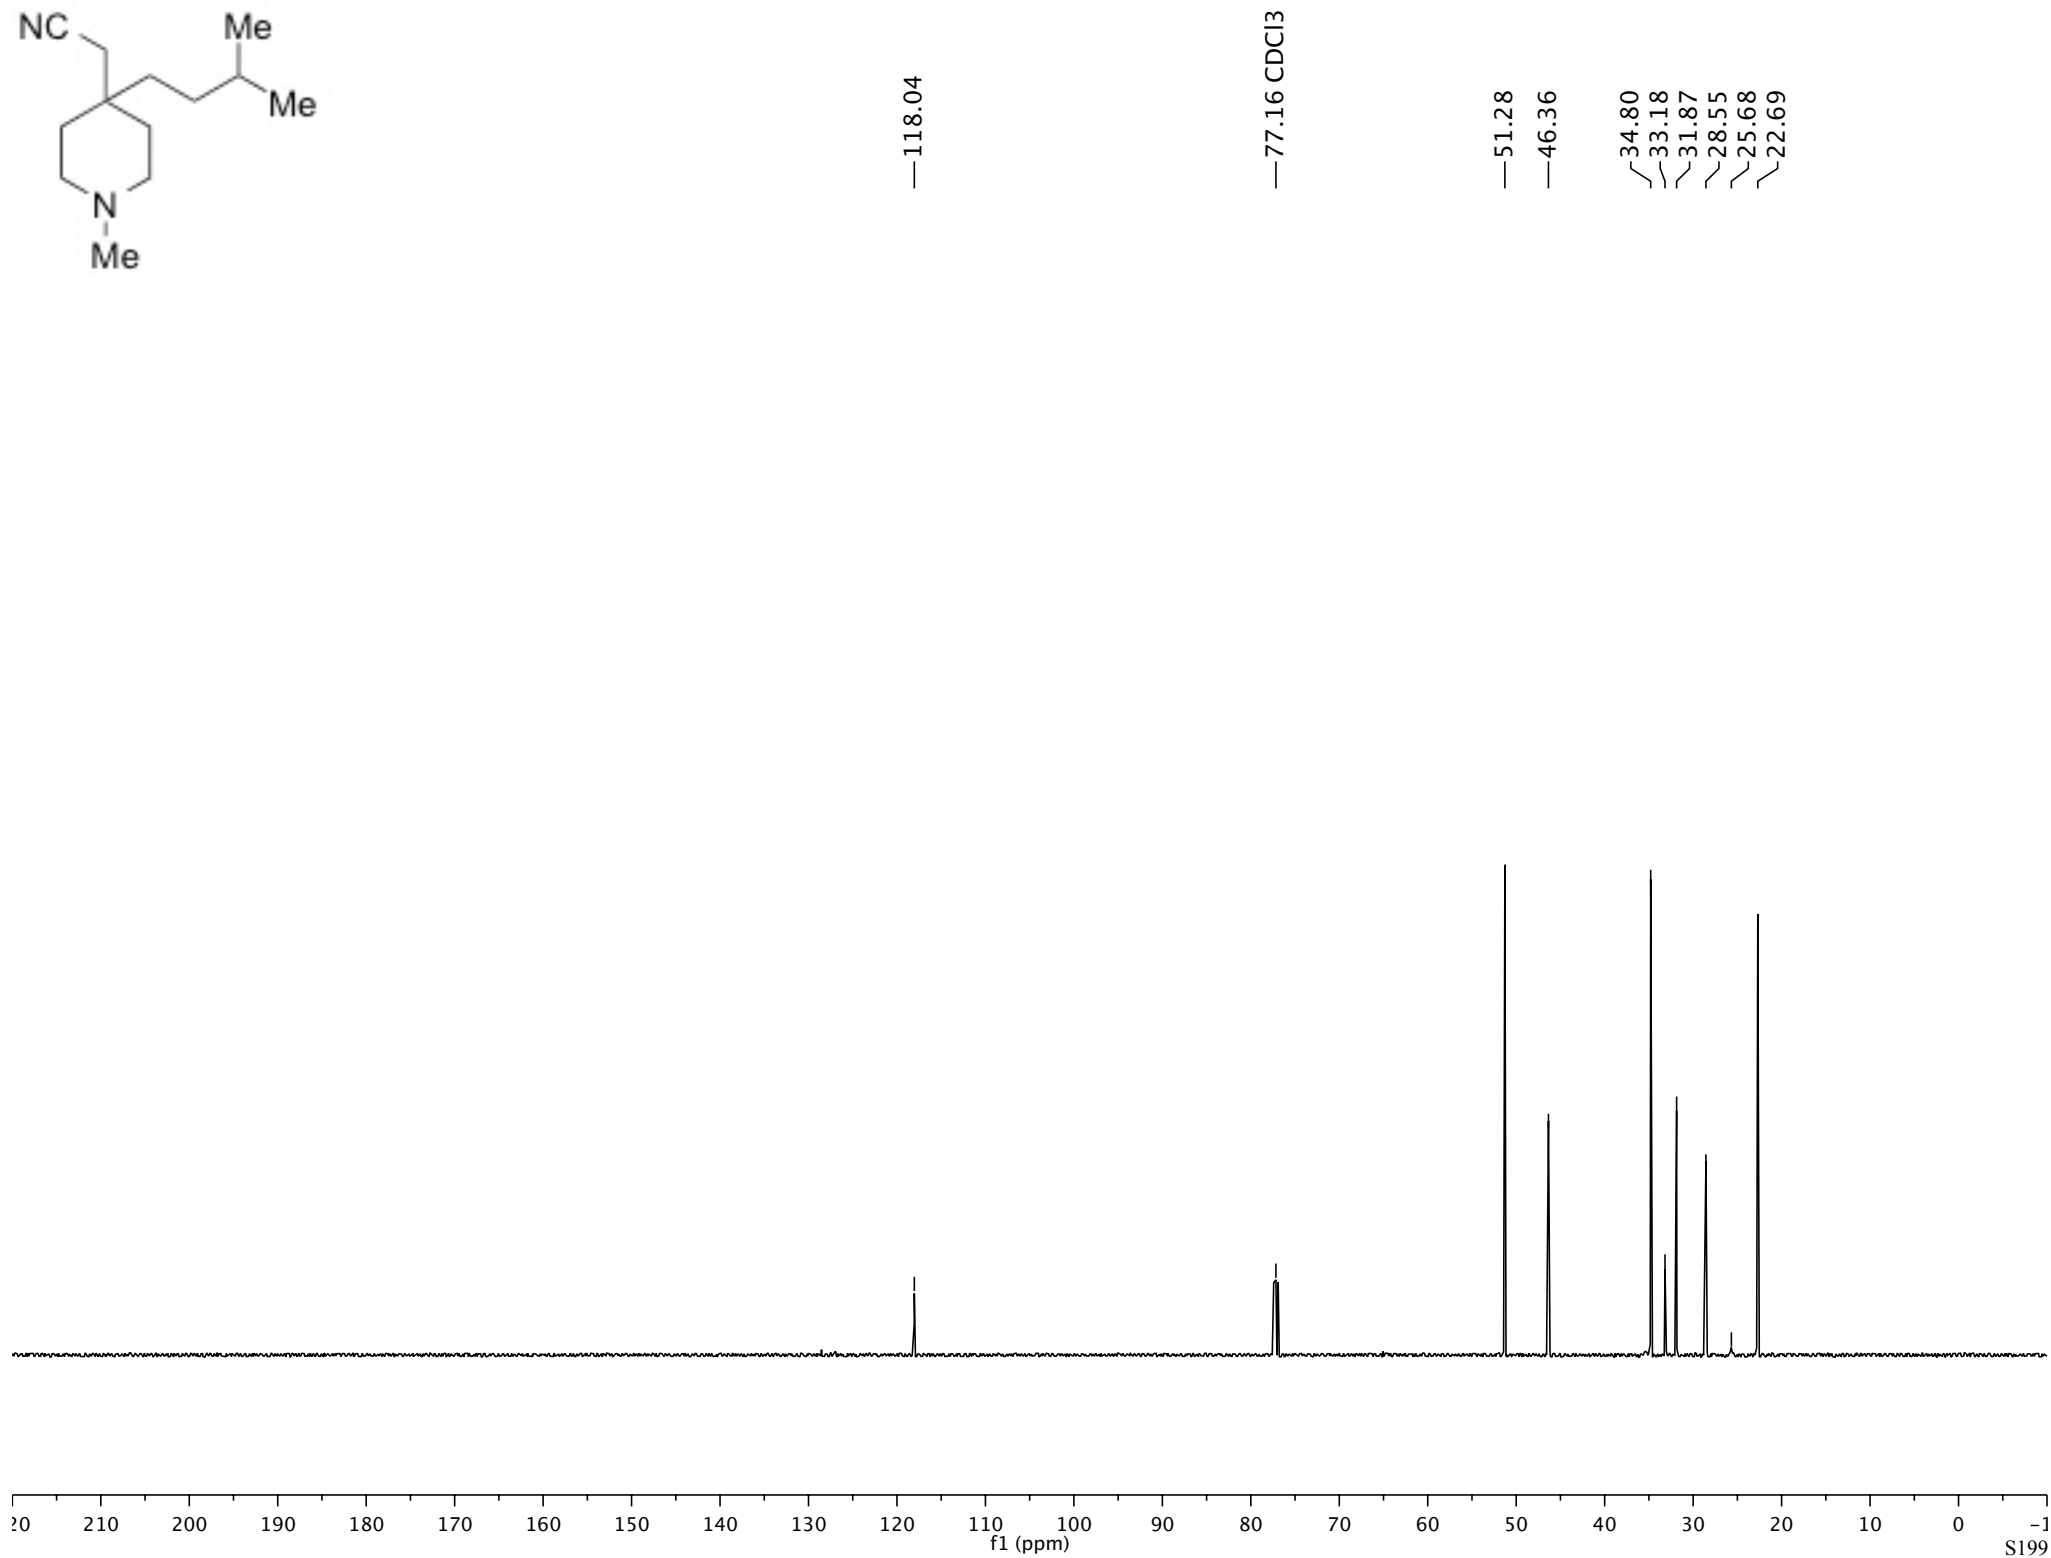



| Parameter              | Value          |
|------------------------|----------------|
| Origin                 | Varian         |
| Spectrometer           | inova          |
| Solvent                | CDCl3          |
| Temperature            | 25.0           |
| Pulse Sequence         | s2pul          |
| Experiment             | 1D             |
| Probe                  | hcn            |
| Number of Scans        | 16             |
| Receiver Gain          | 32             |
| Relaxation Delay       | 2.0000         |
| Pulse Width            | 0.0000         |
| Acquisition Time       | 4.0960         |
| Spectrometer Frequency | 500.07         |
| Spectral Width         | 8000.0         |
| Lowest Frequency       | -1521.1        |
| Nucleus                | <sup>1</sup> H |
| Acquired Size          | 32768          |
| Spectral Size          | 65536          |

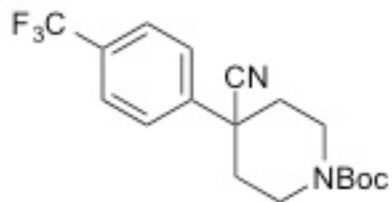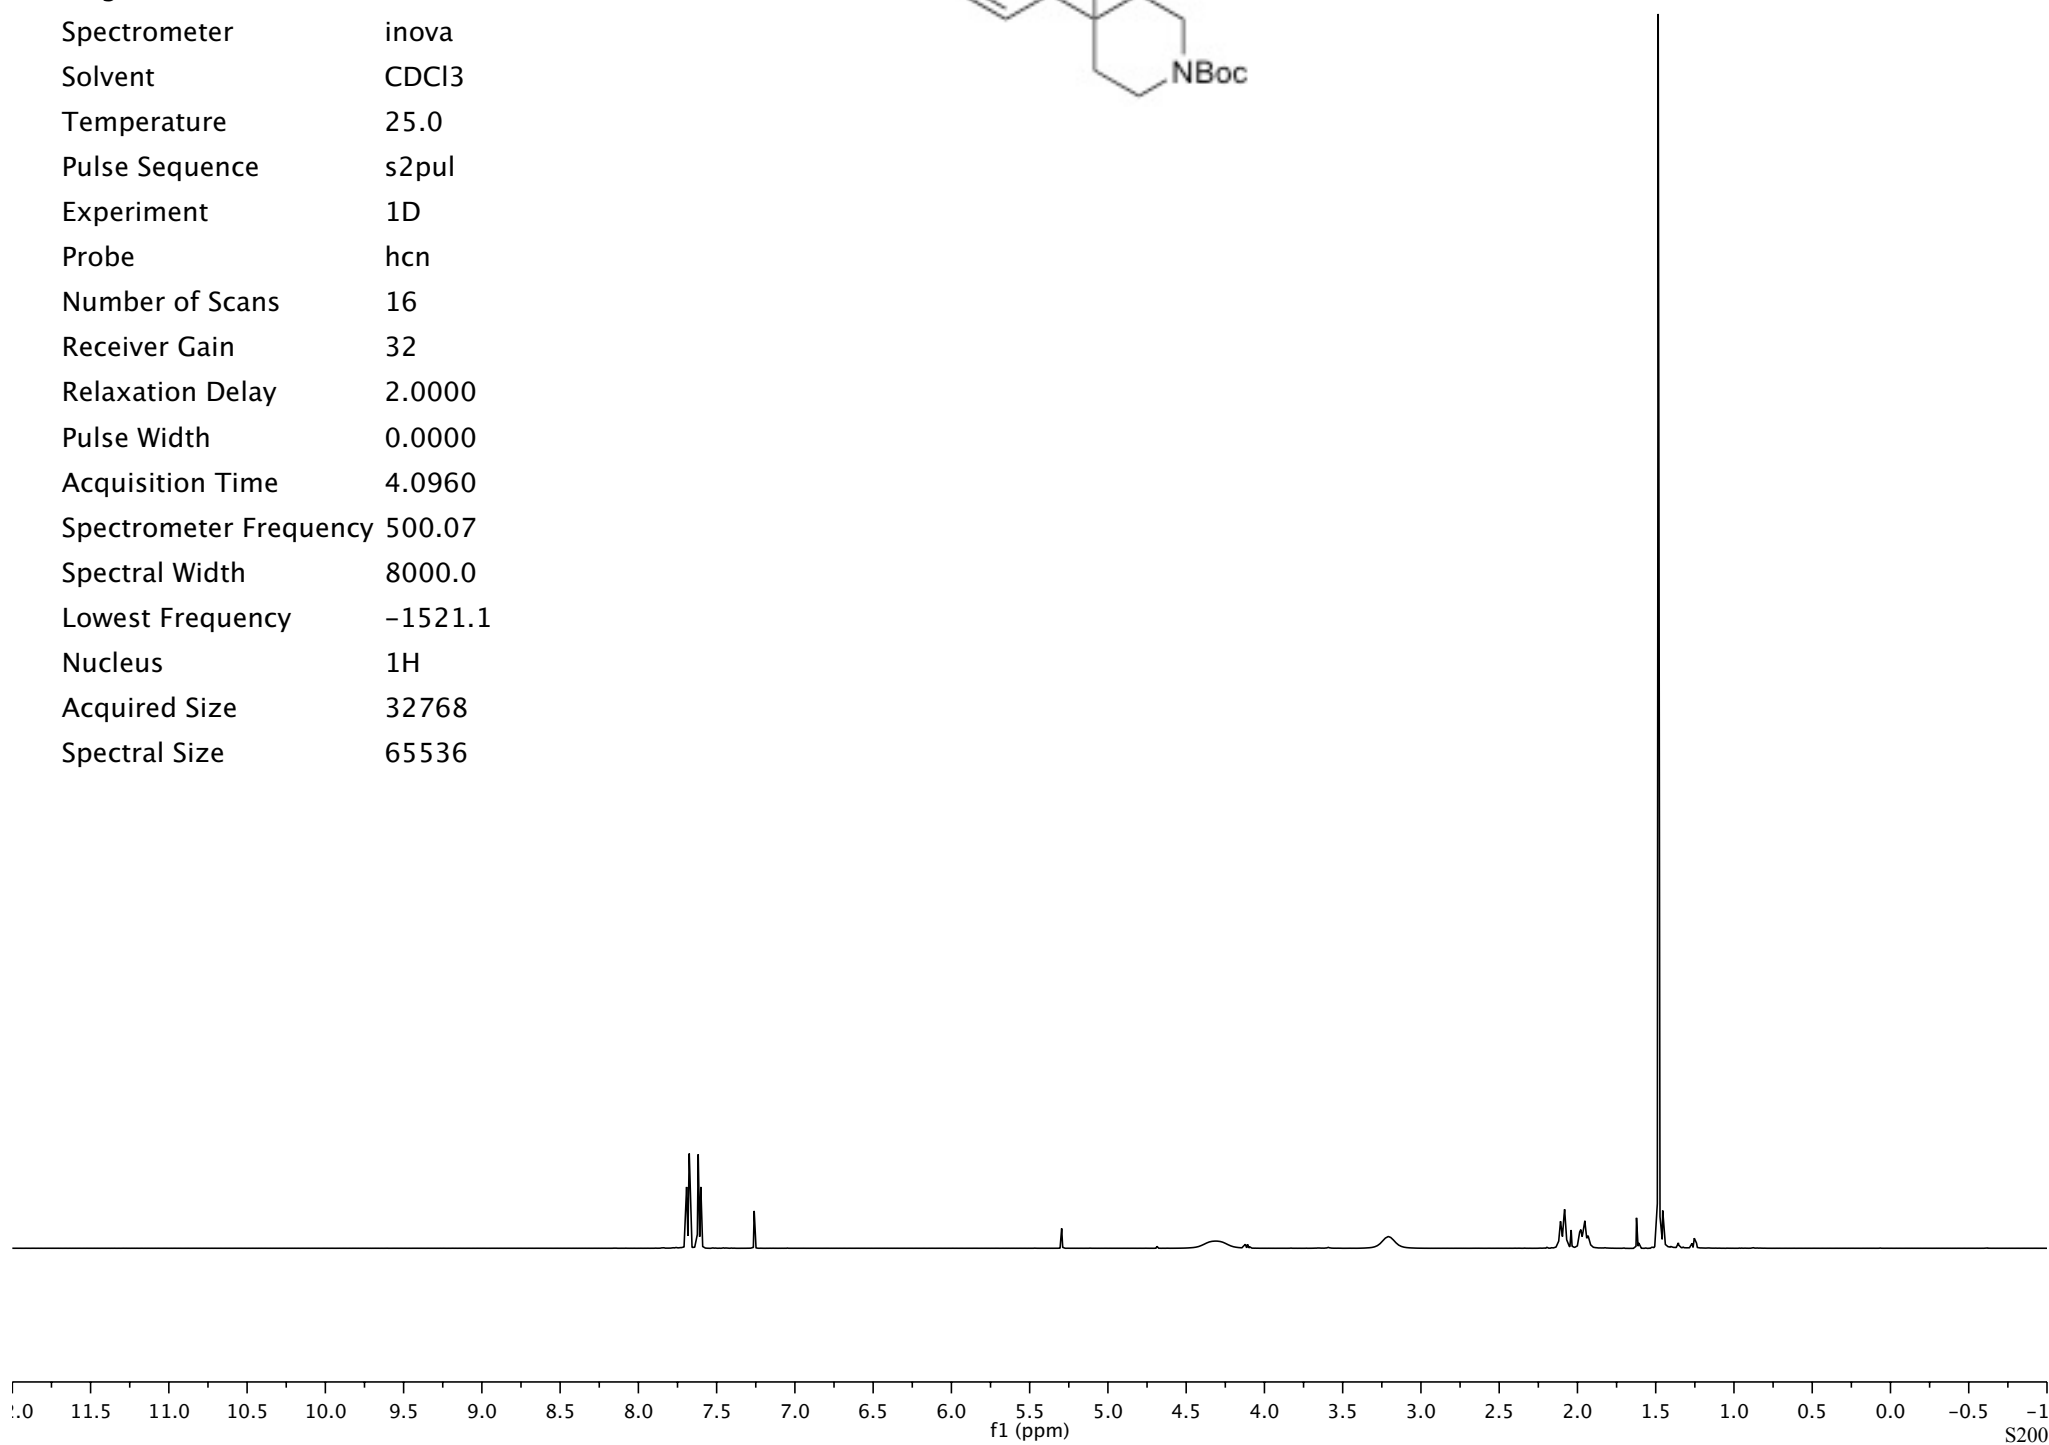

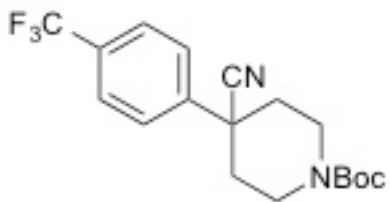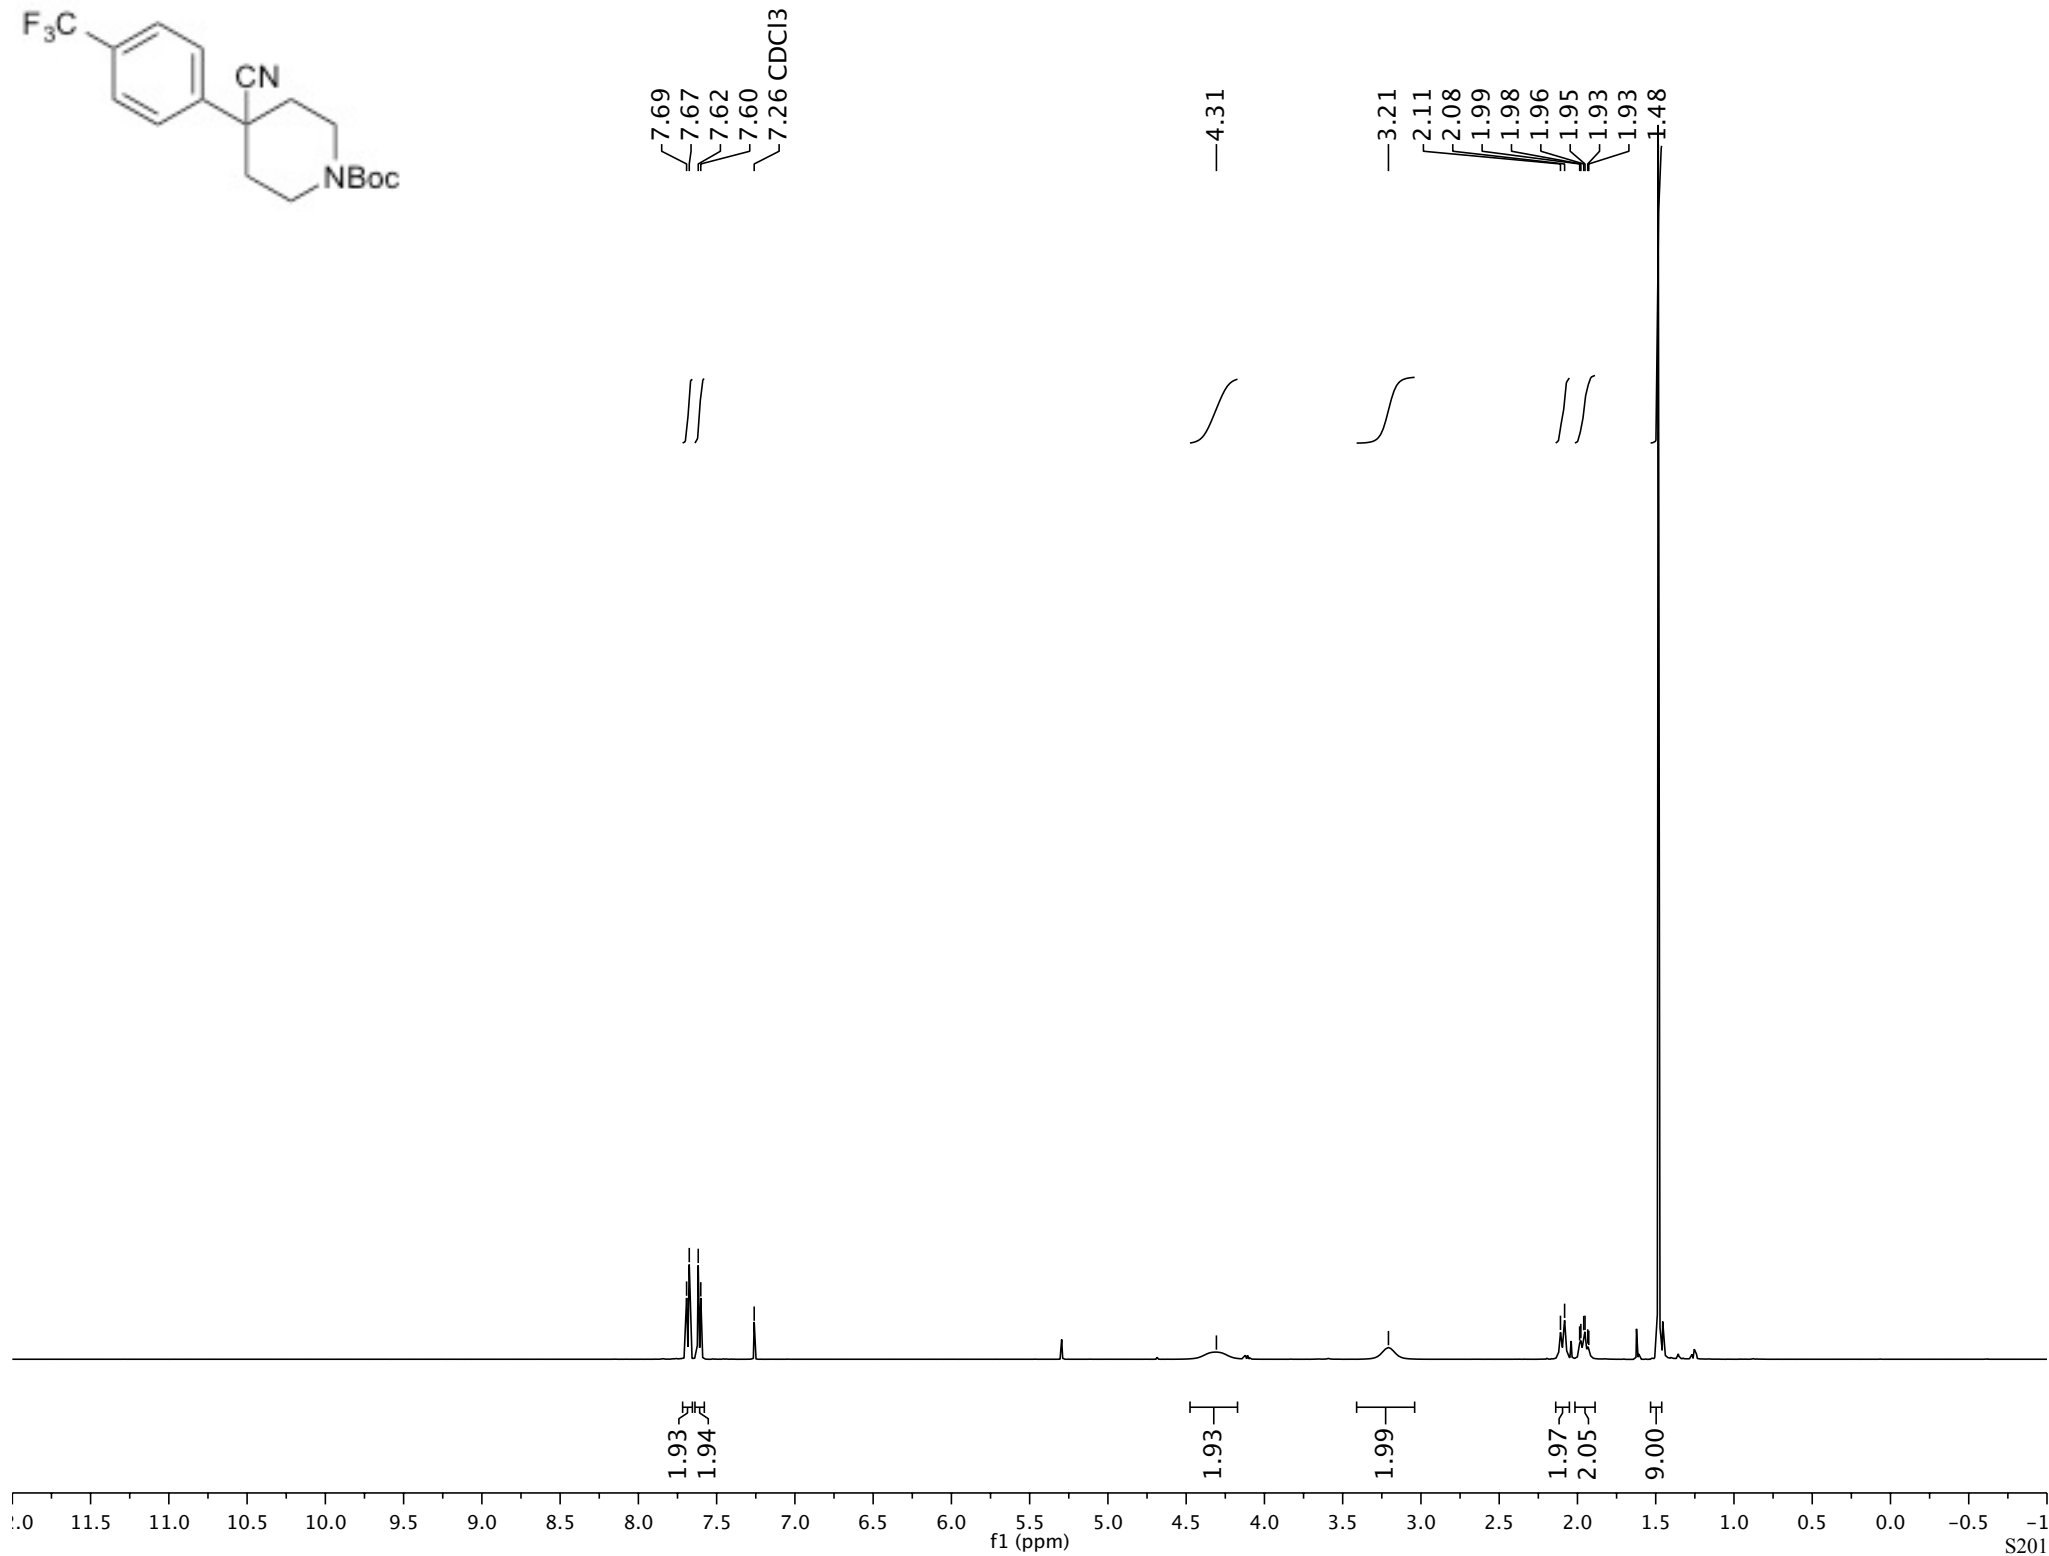

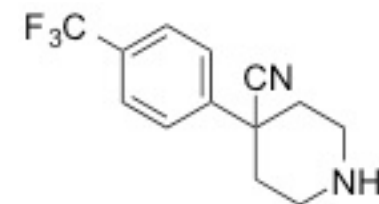

| Parameter              | Value   |
|------------------------|---------|
| Origin                 | Varian  |
| Spectrometer           | inova   |
| Solvent                | CDCl3   |
| Temperature            | 20.0    |
| Pulse Sequence         | s2pul   |
| Experiment             | 1D      |
| Probe                  | hcn     |
| Number of Scans        | 16      |
| Receiver Gain          | 42      |
| Relaxation Delay       | 2.0000  |
| Pulse Width            | 0.0000  |
| Acquisition Time       | 4.0960  |
| Spectrometer Frequency | 500.07  |
| Spectral Width         | 8000.0  |
| Lowest Frequency       | -1521.1 |
| Nucleus                | 1H      |
| Acquired Size          | 32768   |
| Spectral Size          | 65536   |

1,4-dioxane

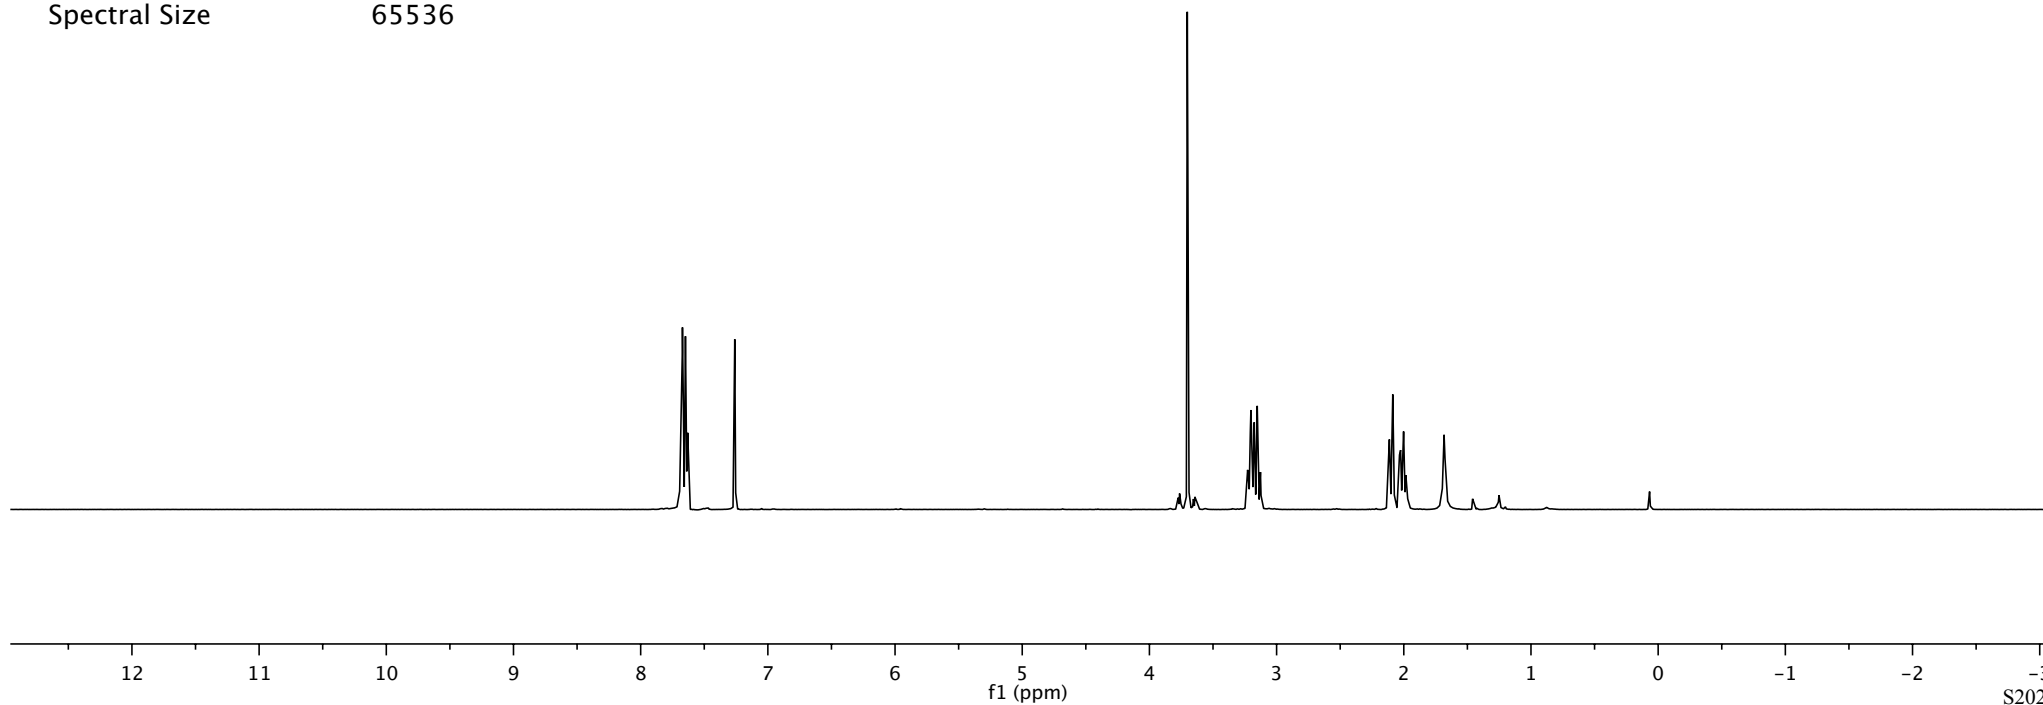

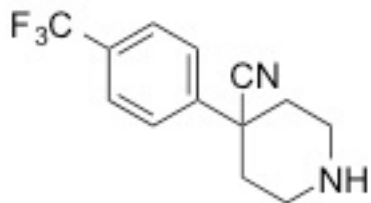

7.69  
7.67  
7.65  
7.65  
7.63  
7.26 CDCl<sub>3</sub>

3.70  
3.23  
3.23  
3.22  
3.21  
3.20  
3.19  
3.18  
3.18  
3.16  
3.15  
3.13  
3.13  
2.12  
2.11  
2.09  
2.09  
2.03  
2.03  
2.01  
2.01  
2.00  
1.98  
1.97  
1.68

1,4-dioxane

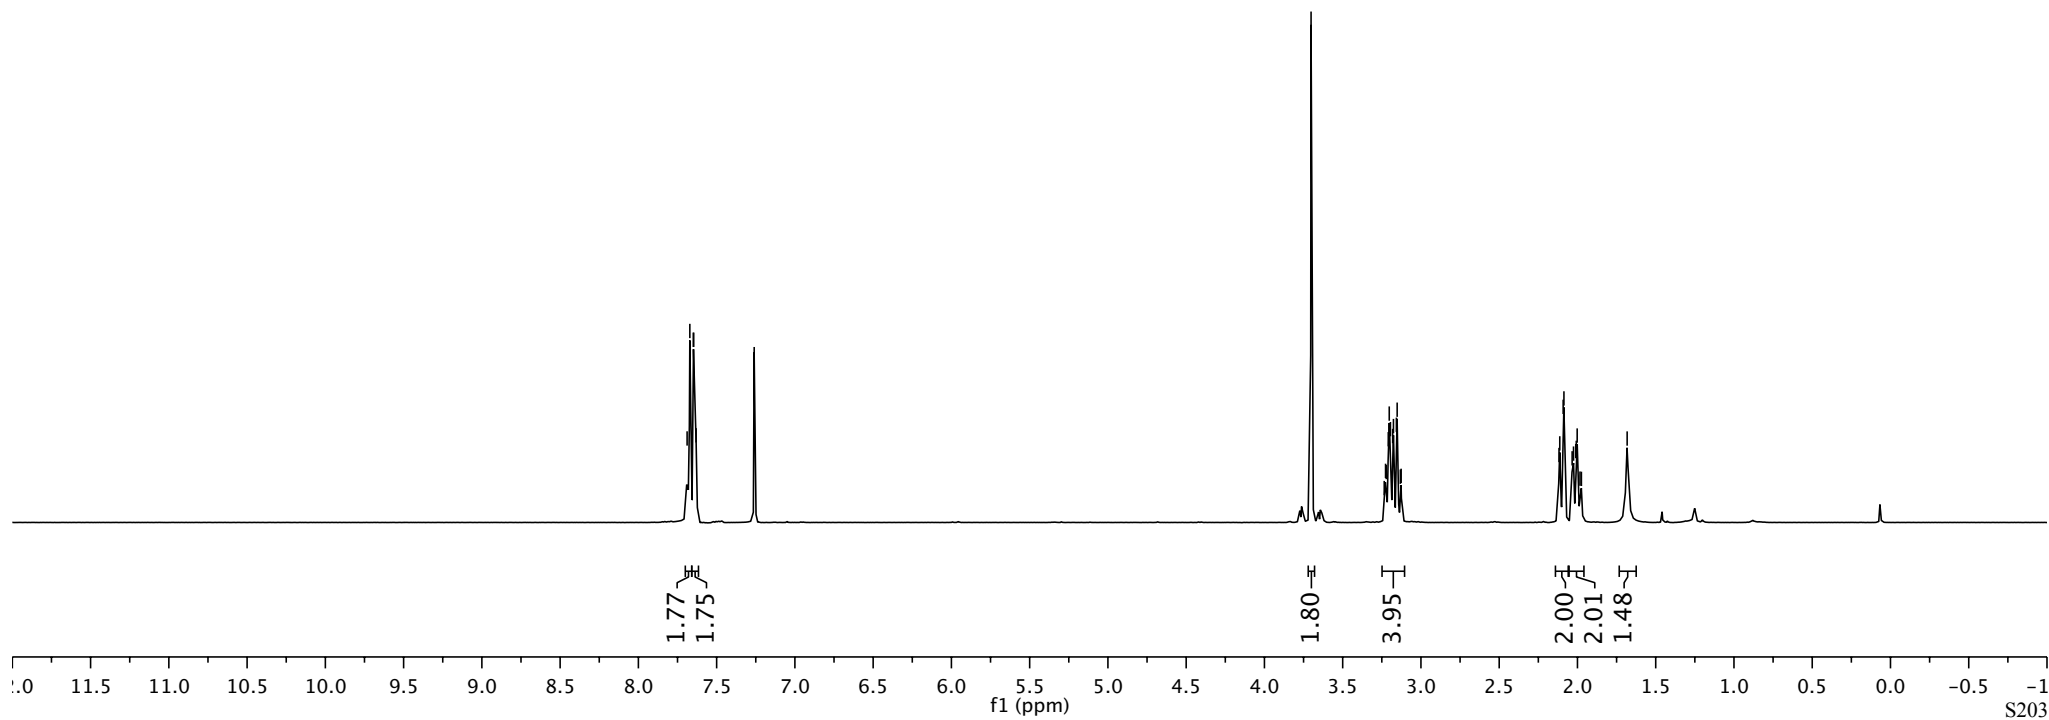

|               |                |
|---------------|----------------|
| Nucleus       | <sup>1</sup> H |
| Acquired Size | 32768          |
| Spectral Size | 65536          |

The <sup>1</sup>H NMR spectrum (400 MHz, CDCl<sub>3</sub>) of compound 10a shows several characteristic peaks. Aromatic protons appear as a multiplet between 7.2 and 7.8 ppm. A sharp singlet at approximately 7.7 ppm corresponds to the aldehyde proton. The aliphatic region (1.0 to 3.0 ppm) contains several multiplets and singlets, including a prominent singlet at 1.0 ppm (likely a methyl group) and a sharp singlet at 2.1 ppm (likely an acetyl methyl group). The x-axis is labeled 'f1 (ppm)' and ranges from 12.0 to -1.0.

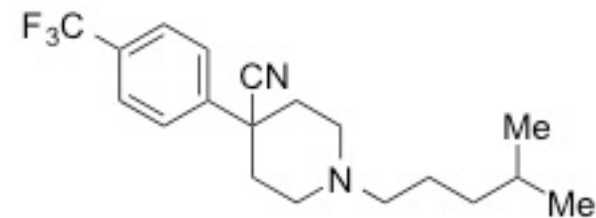

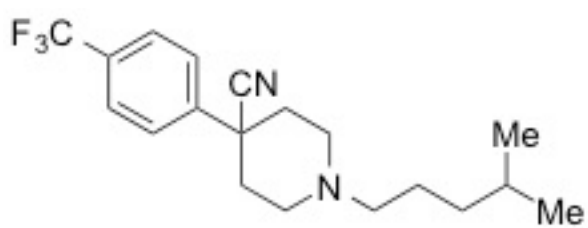

7.68  
7.66  
7.65  
7.63  
7.26 CDCl<sub>3</sub>

3.08  
3.05  
2.51  
2.50  
2.49  
2.48  
2.48  
2.47  
2.46  
2.45  
2.45  
2.44  
2.43  
2.43  
2.41  
2.14  
2.13  
2.13  
2.13  
2.12  
2.11  
1.58  
1.56  
1.55  
1.54  
1.53  
1.53  
1.52  
1.51  
1.51  
1.22  
1.21  
1.19  
1.18  
0.90  
0.89

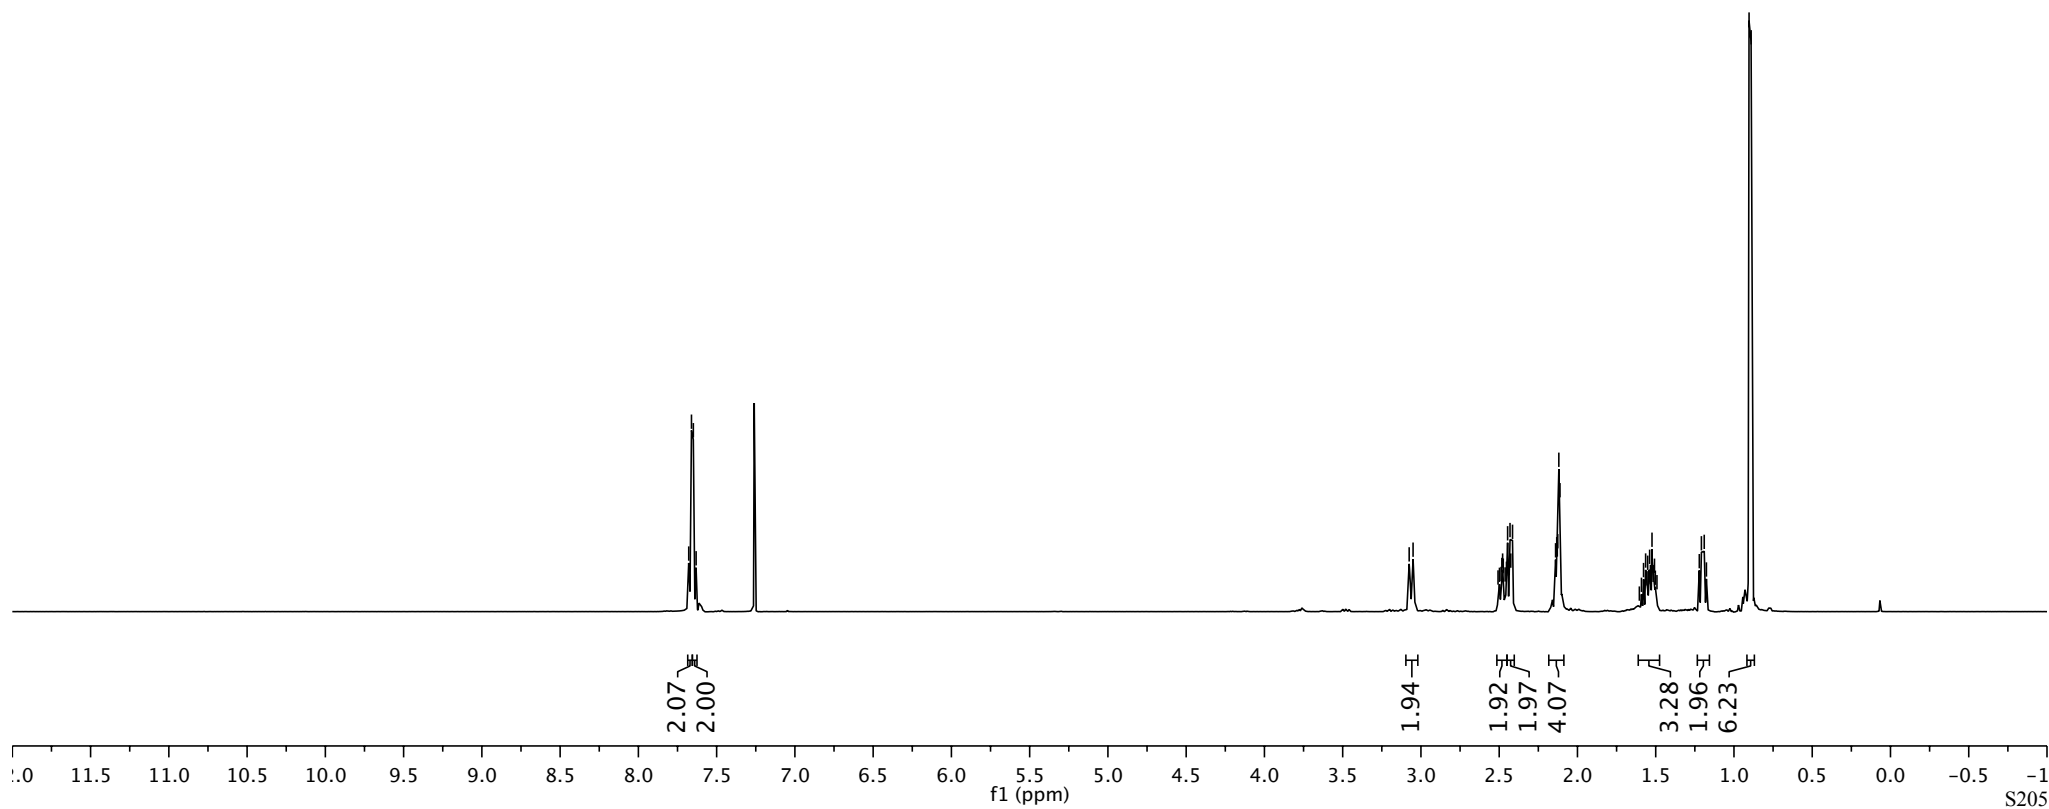

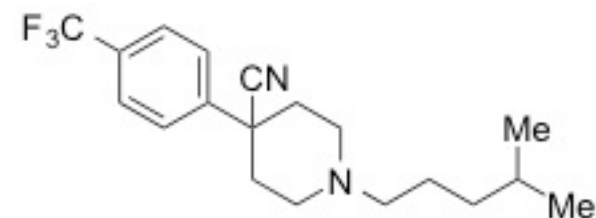

| Parameter              | Value             |
|------------------------|-------------------|
| Origin                 | Varian            |
| Spectrometer           | inova             |
| Solvent                | CDCl <sub>3</sub> |
| Temperature            | 25.0              |
| Pulse Sequence         | s2pul             |
| Experiment             | 1D                |
| Probe                  | QUAD              |
| Number of Scans        | 1161              |
| Receiver Gain          | 60                |
| Relaxation Delay       | 2.0000            |
| Pulse Width            | 0.0000            |
| Acquisition Time       | 1.0863            |
| Spectrometer Frequency | 125.66            |
| Spectral Width         | 30165.9           |
| Lowest Frequency       | -1272.5           |
| Nucleus                | <sup>13</sup> C   |
| Acquired Size          | 32768             |
| Spectral Size          | 65536             |

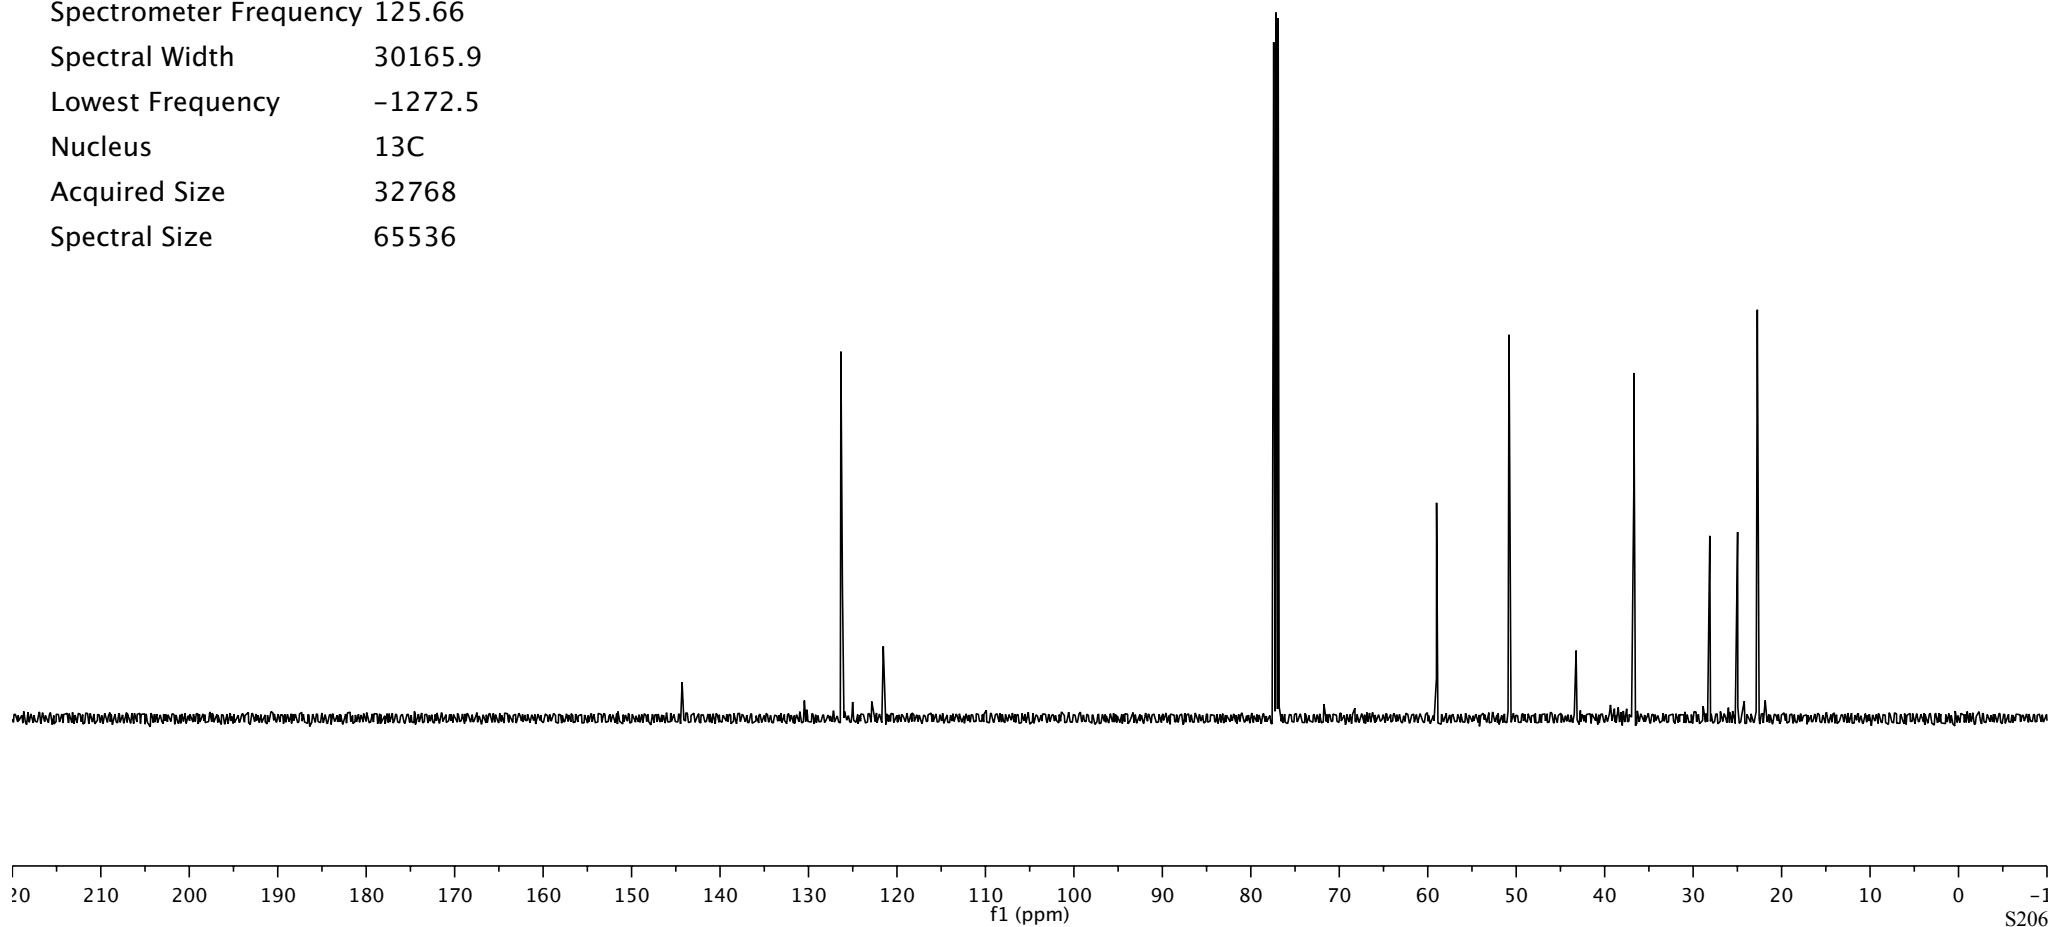

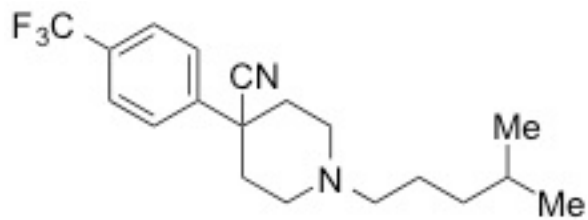

— 144.29  
— 130.73  
— 130.47  
— 126.34  
— 126.22  
— 126.20  
— 126.17  
— 126.14  
— 125.01  
— 122.85  
— 121.55

— 77.16 CDCl<sub>3</sub>

— 59.00

— 50.82

— 43.23

— 36.88

— 36.70

— 28.12

— 24.97

— 22.75

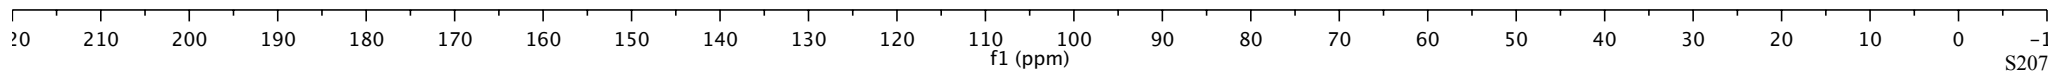



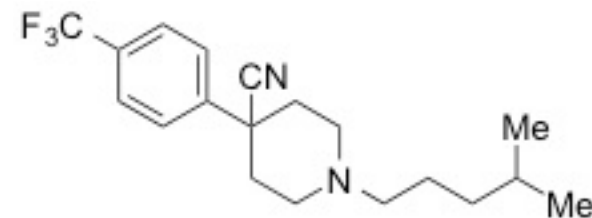

| Parameter              | Value    |
|------------------------|----------|
| Origin                 | Varian   |
| Spectrometer           | inova    |
| Solvent                | CDCl3    |
| Temperature            | 25.0     |
| Pulse Sequence         | s2pul    |
| Experiment             | 1D       |
| Probe                  | QUAD     |
| Number of Scans        | 128      |
| Receiver Gain          | 52       |
| Relaxation Delay       | 0.0000   |
| Pulse Width            | 0.0000   |
| Acquisition Time       | 0.3277   |
| Spectrometer Frequency | 470.15   |
| Spectral Width         | 100000.0 |
| Lowest Frequency       | -79501.3 |
| Nucleus                | 19F      |
| Acquired Size          | 32768    |
| Spectral Size          | 65536    |

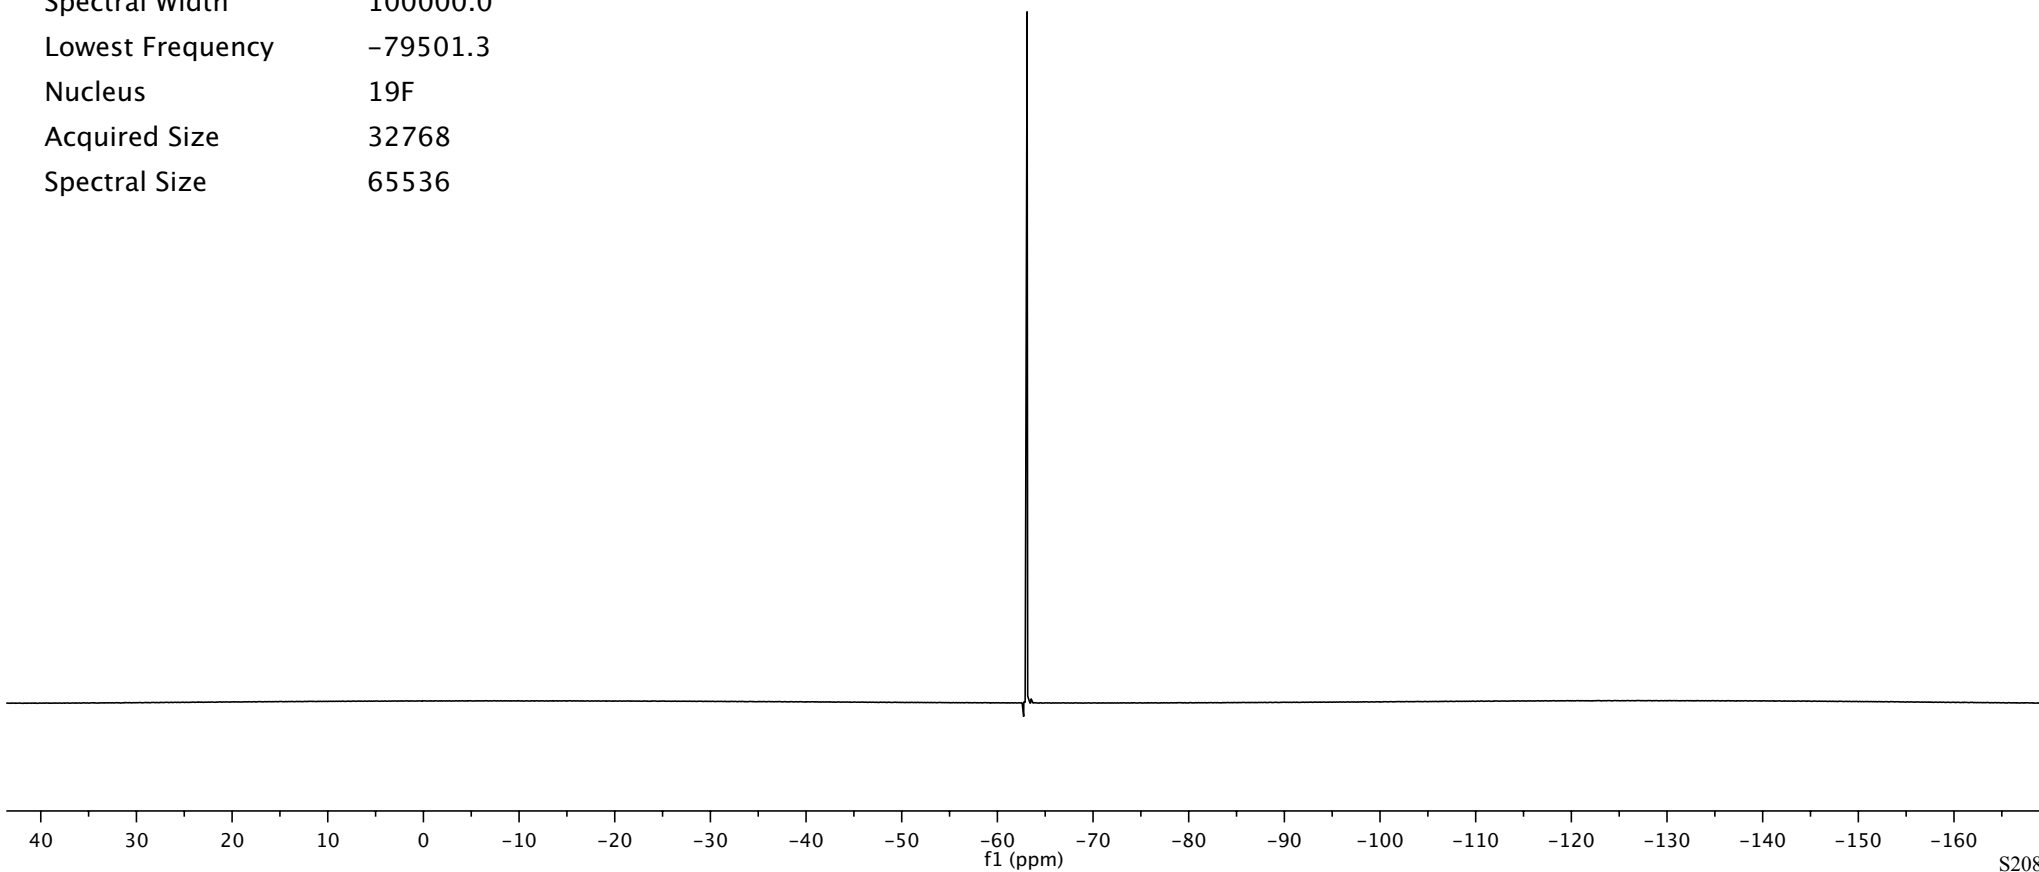

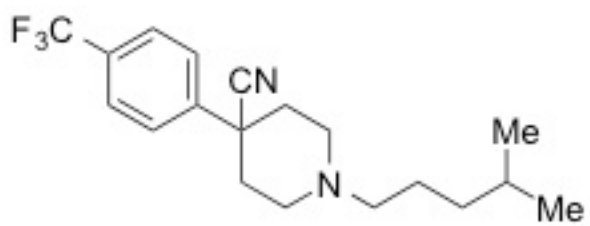

---63.11

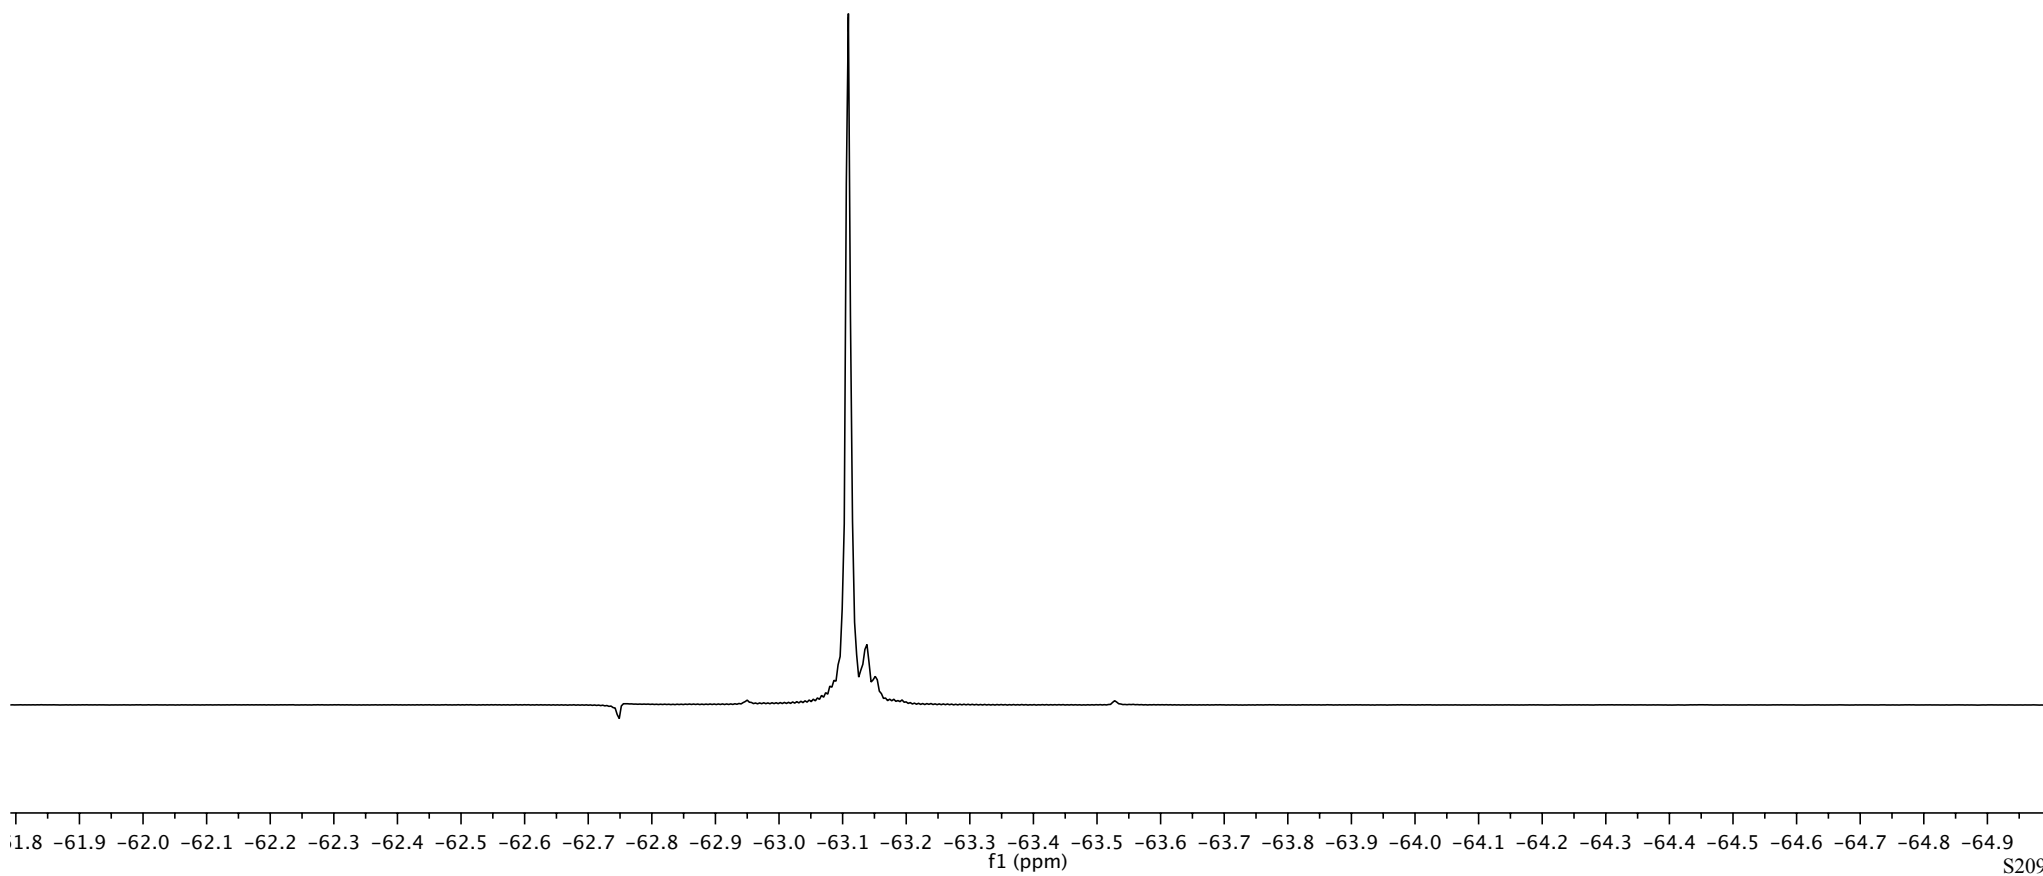

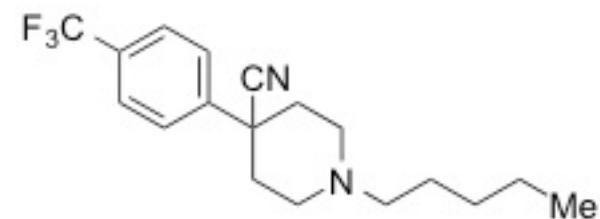

| Parameter              | Value          |
|------------------------|----------------|
| Origin                 | Varian         |
| Spectrometer           | inova          |
| Solvent                | CDCl3          |
| Temperature            | 20.0           |
| Pulse Sequence         | s2pul          |
| Experiment             | 1D             |
| Probe                  | QUAD           |
| Number of Scans        | 16             |
| Receiver Gain          | 46             |
| Relaxation Delay       | 2.0000         |
| Pulse Width            | 0.0000         |
| Acquisition Time       | 4.6645         |
| Spectrometer Frequency | 499.69         |
| Spectral Width         | 7024.9         |
| Lowest Frequency       | -1021.9        |
| Nucleus                | <sup>1</sup> H |
| Acquired Size          | 32768          |
| Spectral Size          | 65536          |

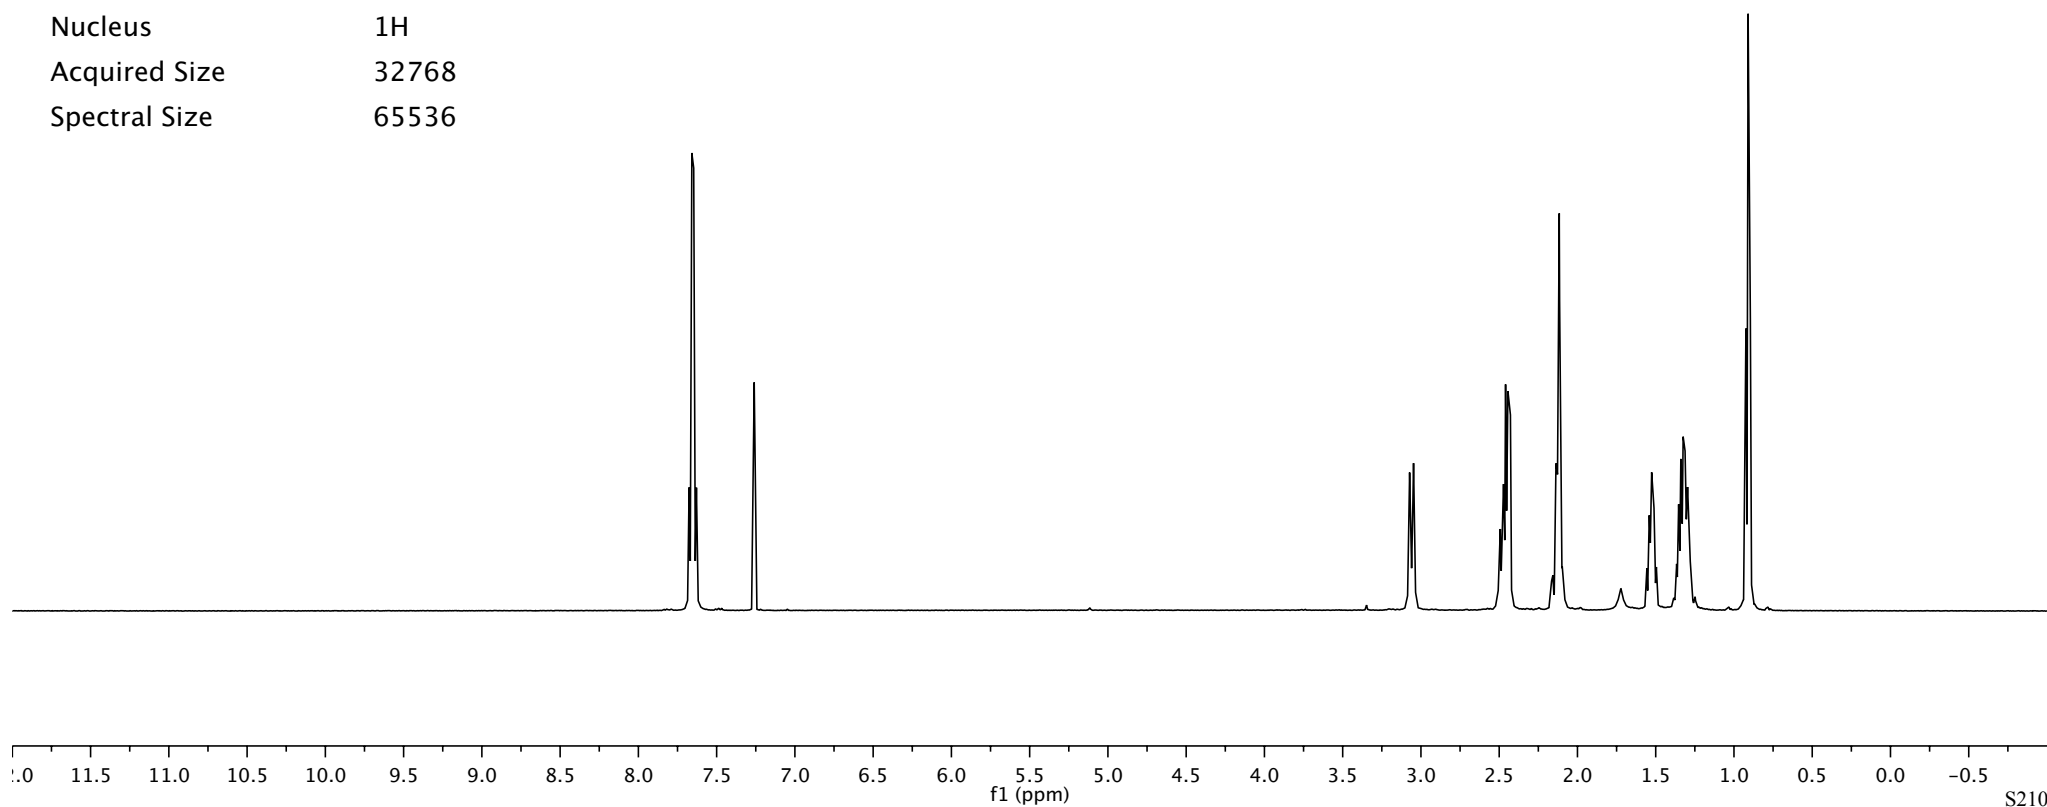

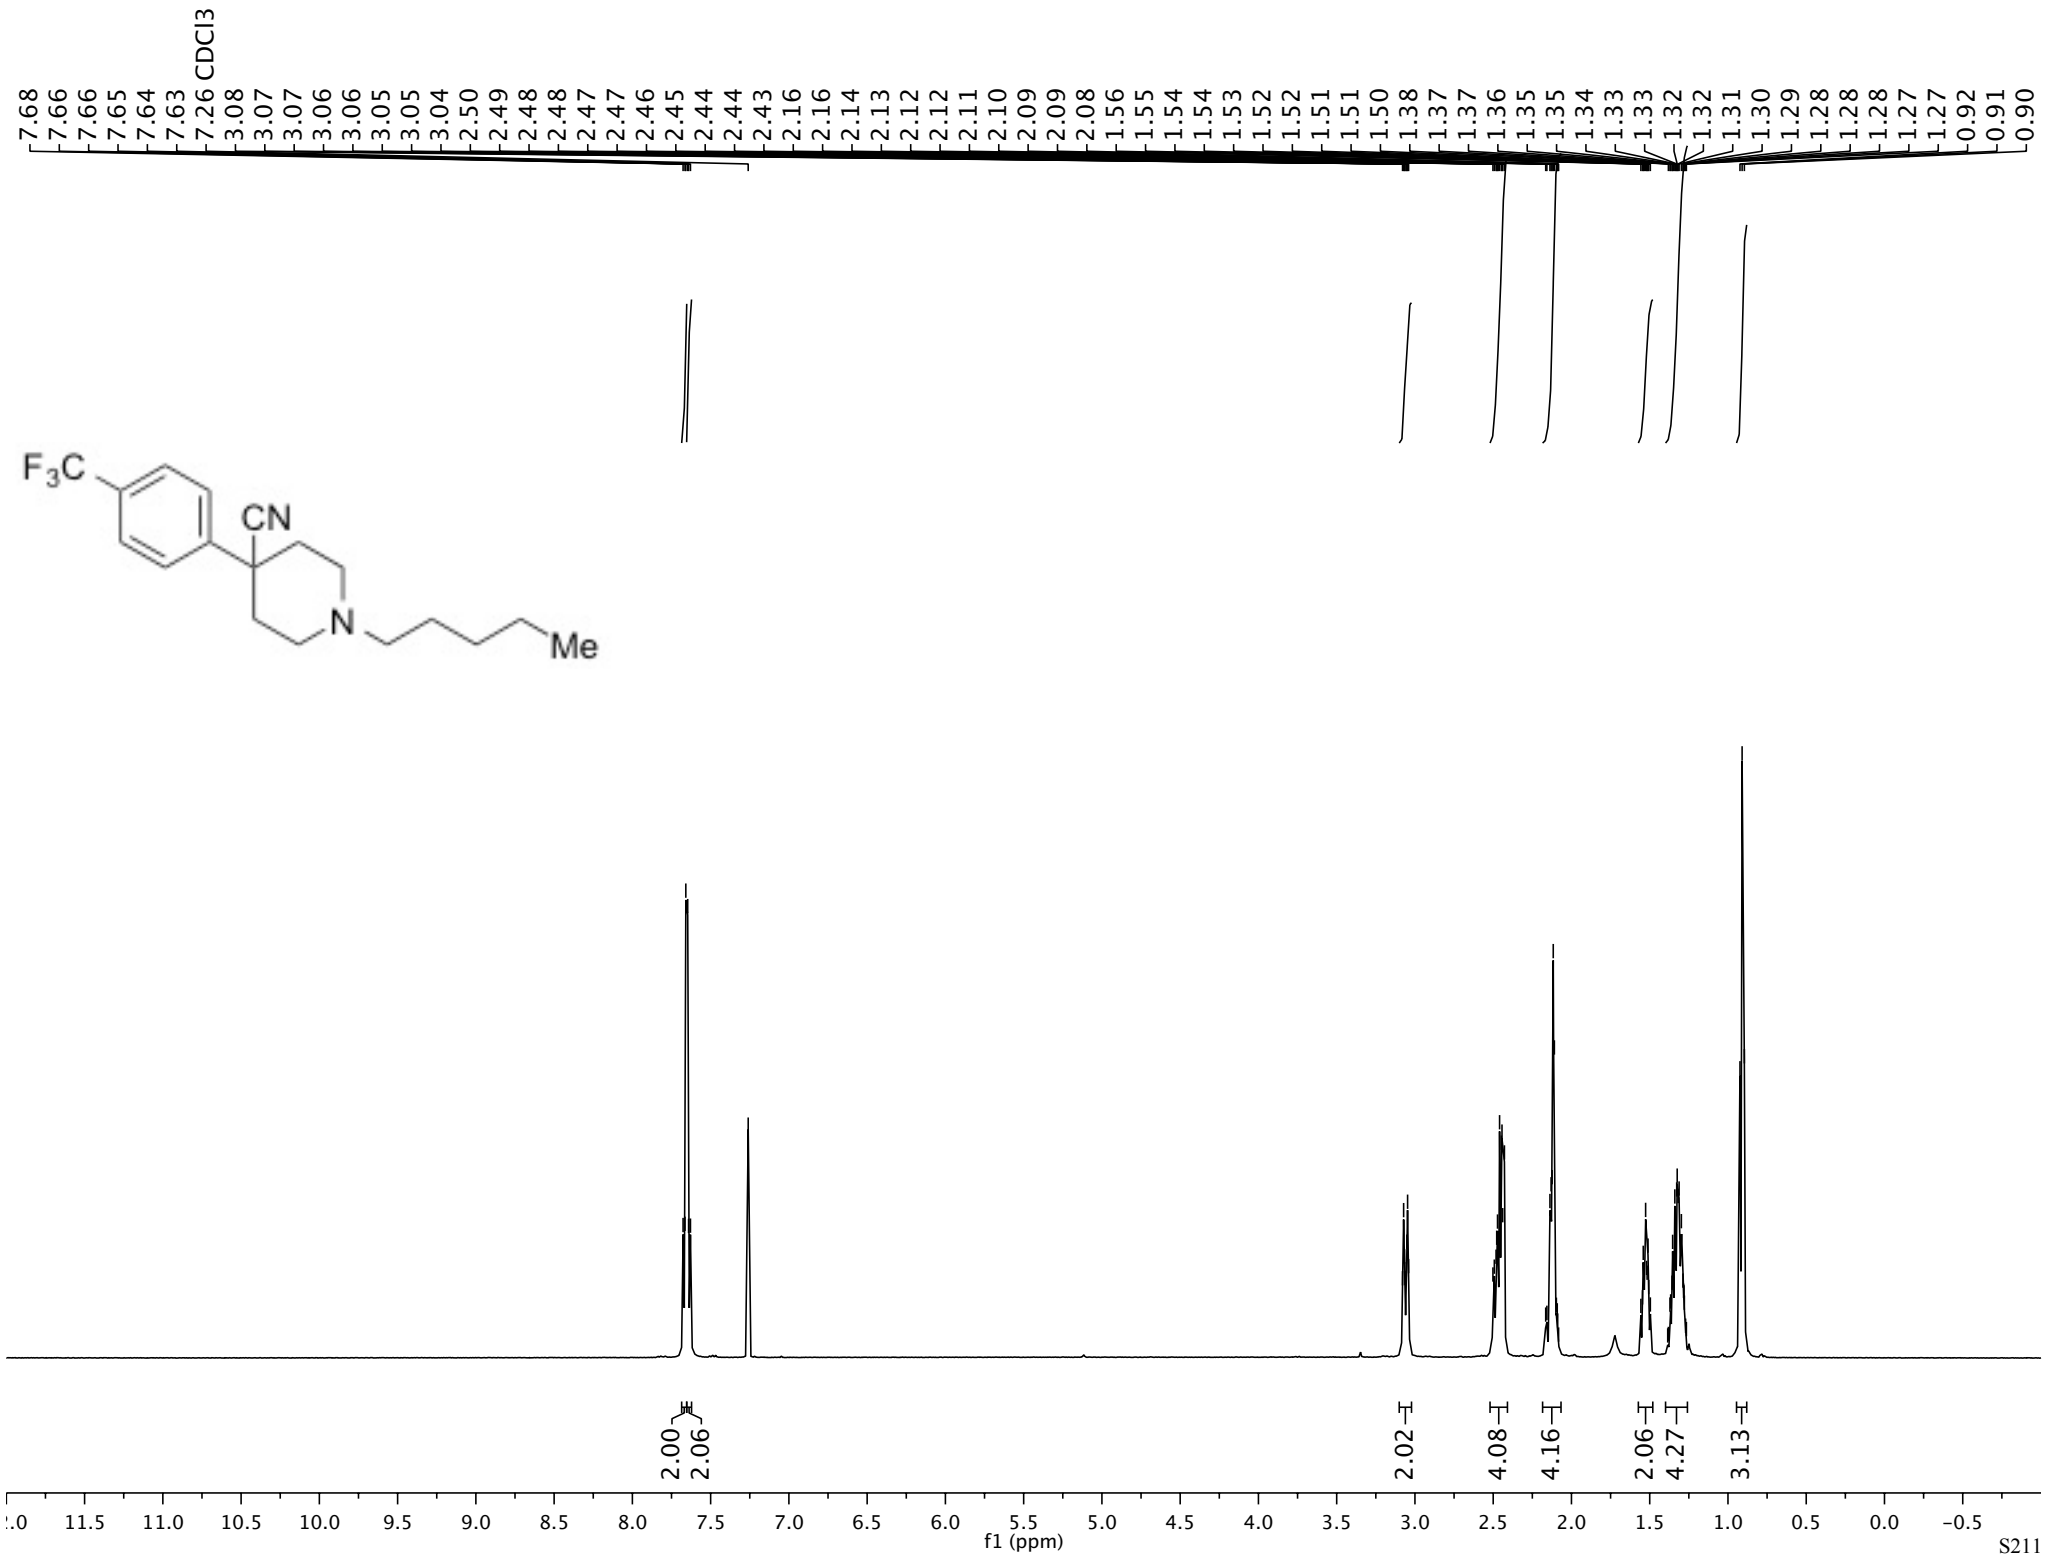

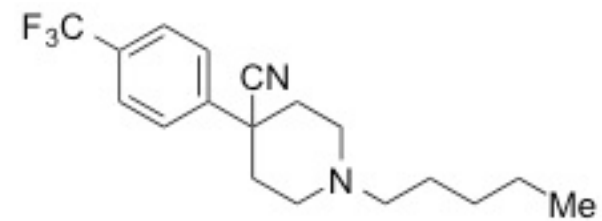

| Parameter              | Value   |
|------------------------|---------|
| Origin                 | Varian  |
| Spectrometer           | inova   |
| Solvent                | CDCl3   |
| Temperature            | 20.0    |
| Pulse Sequence         | s2pul   |
| Experiment             | 1D      |
| Probe                  | QUAD    |
| Number of Scans        | 11512   |
| Receiver Gain          | 60      |
| Relaxation Delay       | 2.0000  |
| Pulse Width            | 0.0000  |
| Acquisition Time       | 1.0863  |
| Spectrometer Frequency | 125.66  |
| Spectral Width         | 30165.9 |
| Lowest Frequency       | -1272.9 |
| Nucleus                | 13C     |
| Acquired Size          | 32768   |
| Spectral Size          | 65536   |

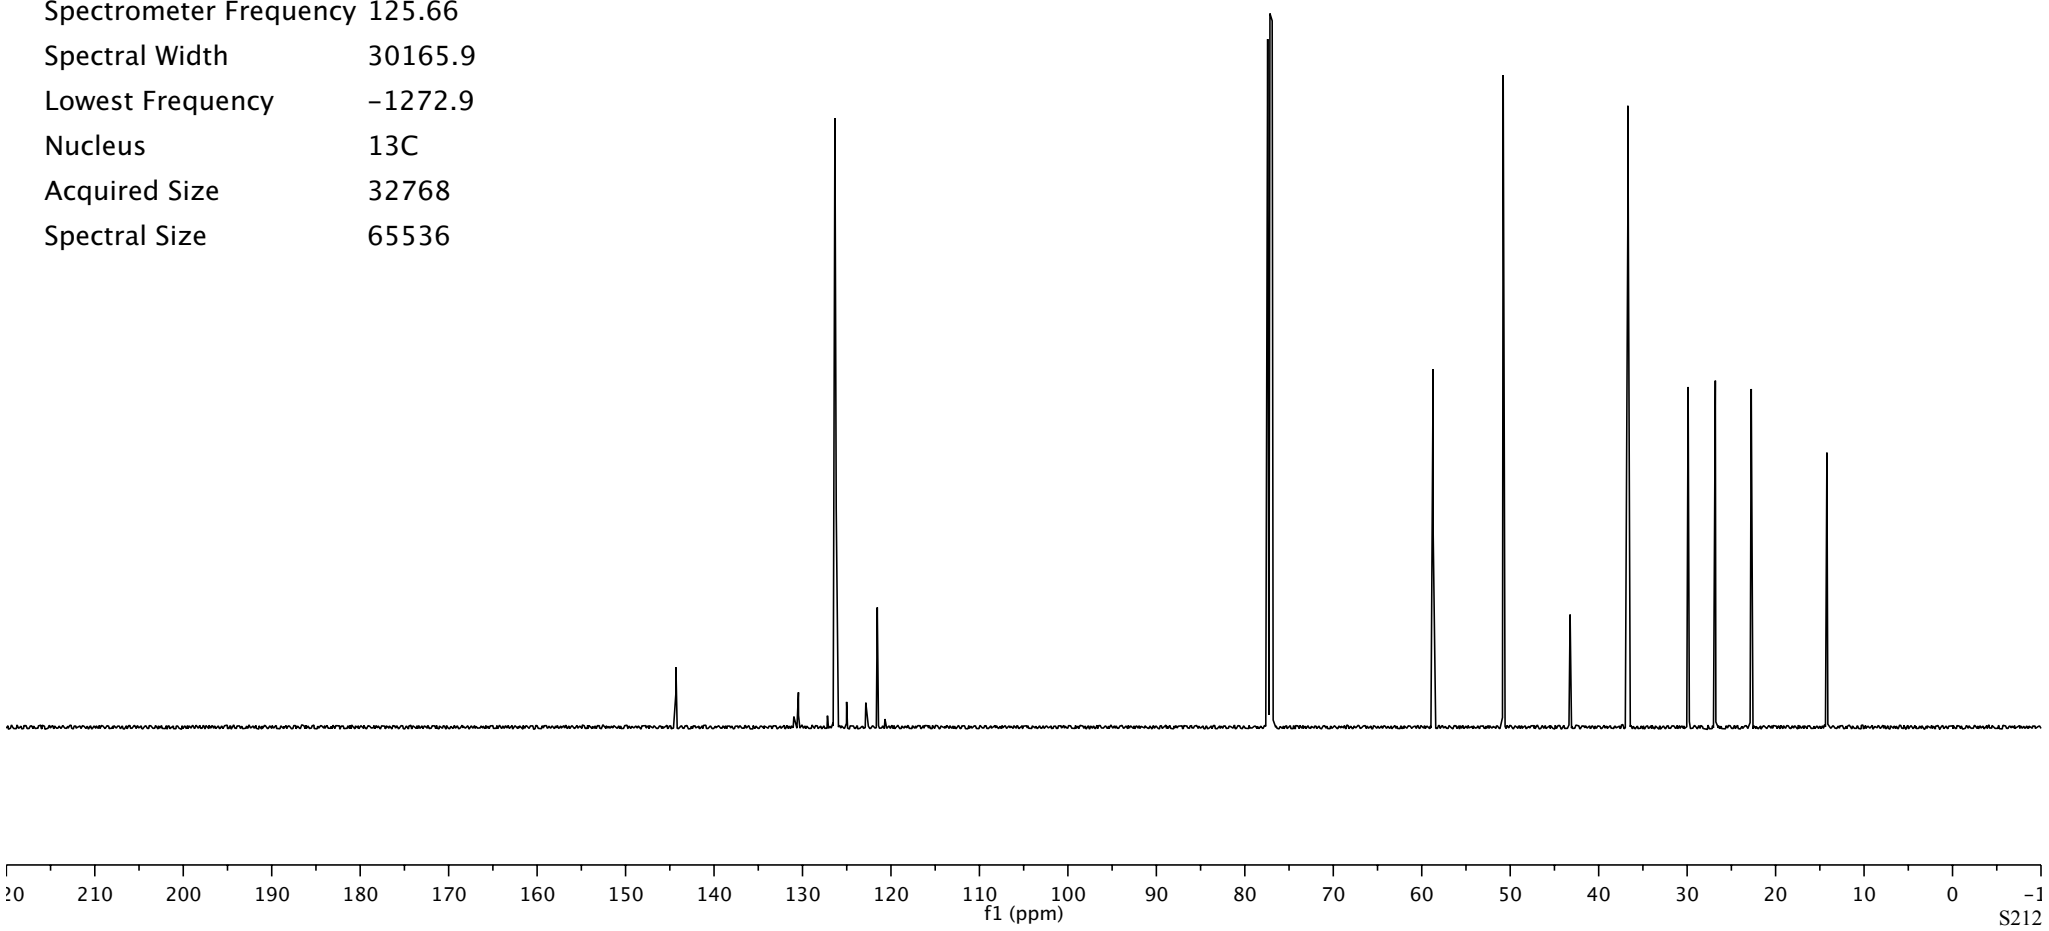

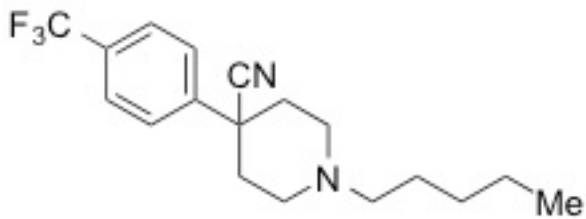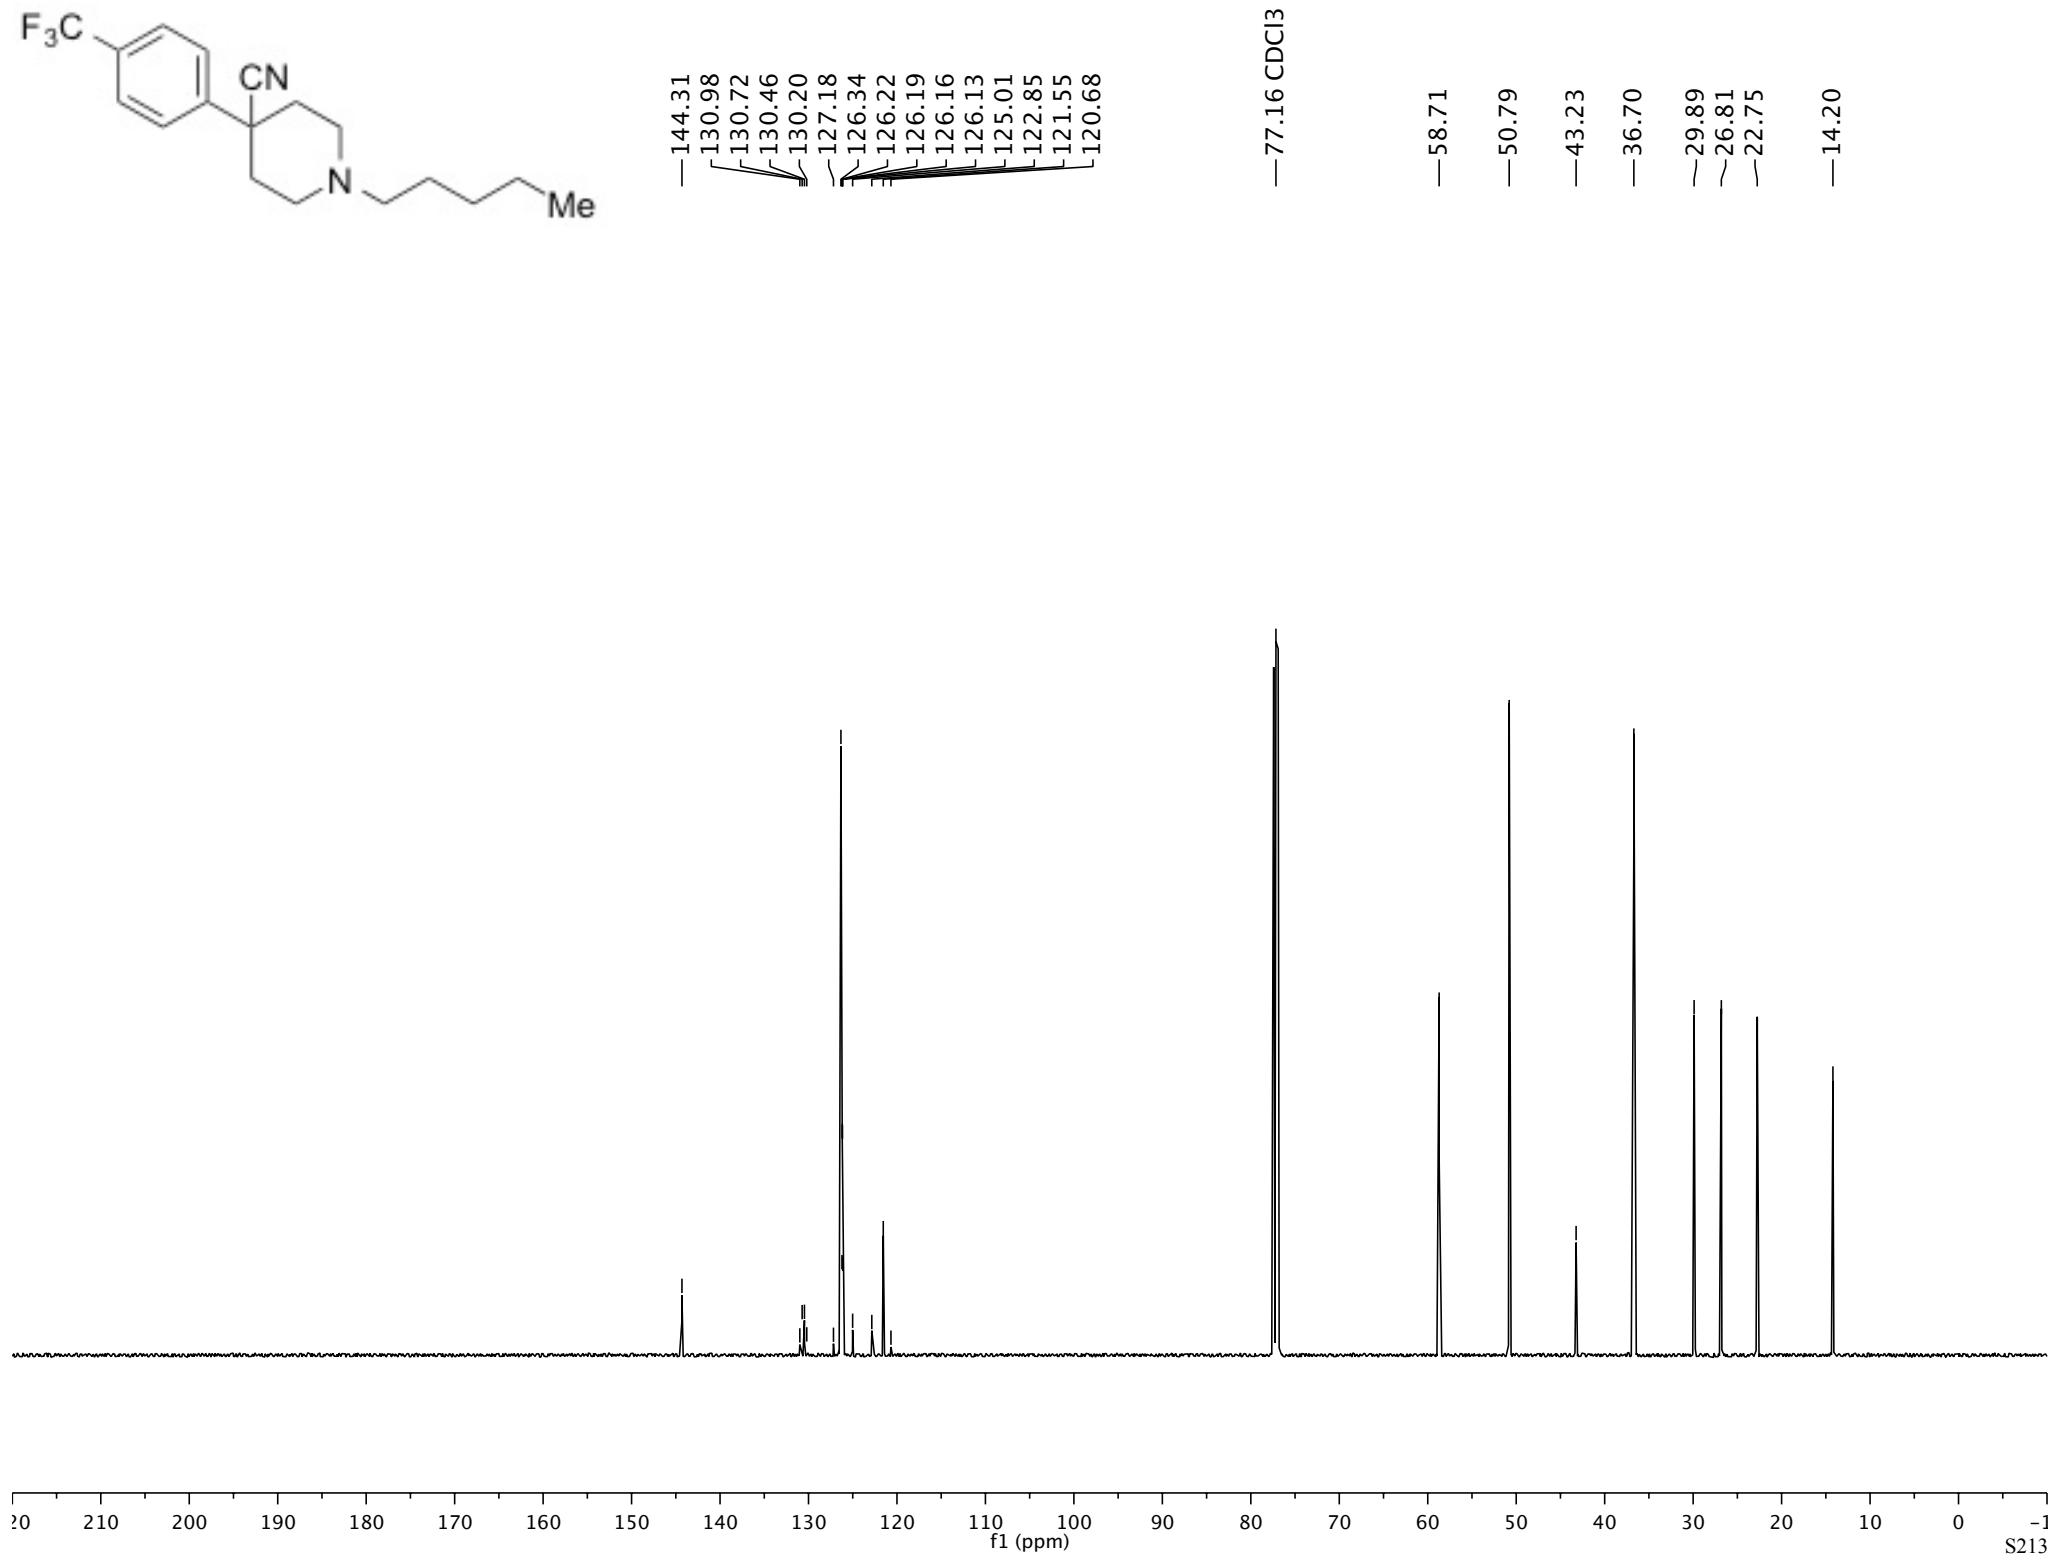

| Parameter              | Value    |
|------------------------|----------|
| Origin                 | Varian   |
| Spectrometer           | inova    |
| Solvent                | CDCl3    |
| Temperature            | 20.0     |
| Pulse Sequence         | s2pul    |
| Experiment             | 1D       |
| Probe                  | QUAD     |
| Number of Scans        | 132      |
| Receiver Gain          | 60       |
| Relaxation Delay       | 0.0000   |
| Pulse Width            | 0.0000   |
| Acquisition Time       | 0.3277   |
| Spectrometer Frequency | 470.15   |
| Spectral Width         | 100000.0 |
| Lowest Frequency       | -79501.3 |
| Nucleus                | 19F      |
| Acquired Size          | 32768    |
| Spectral Size          | 65536    |

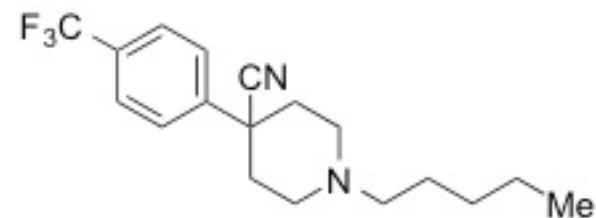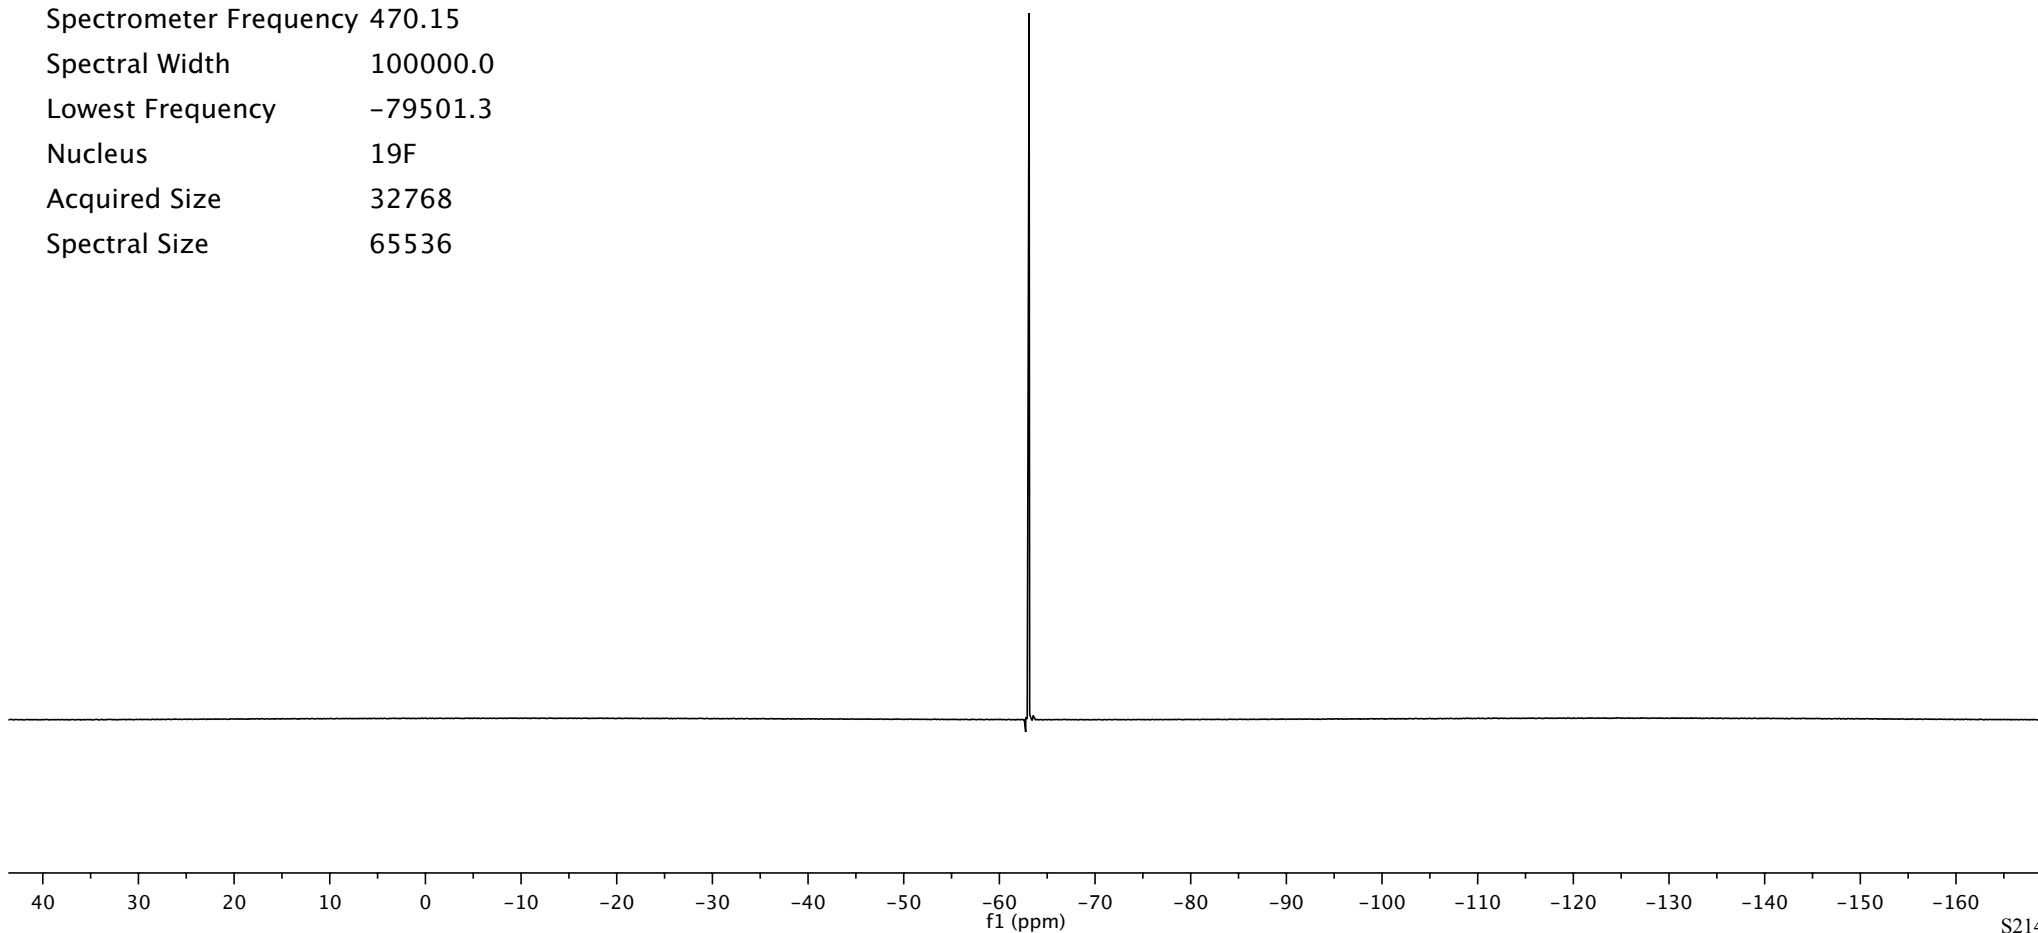

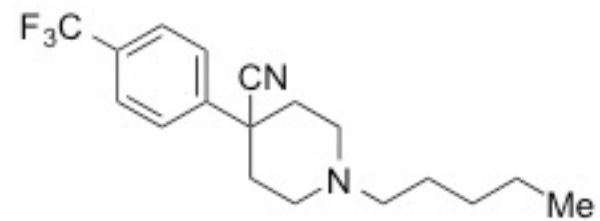

--63.11

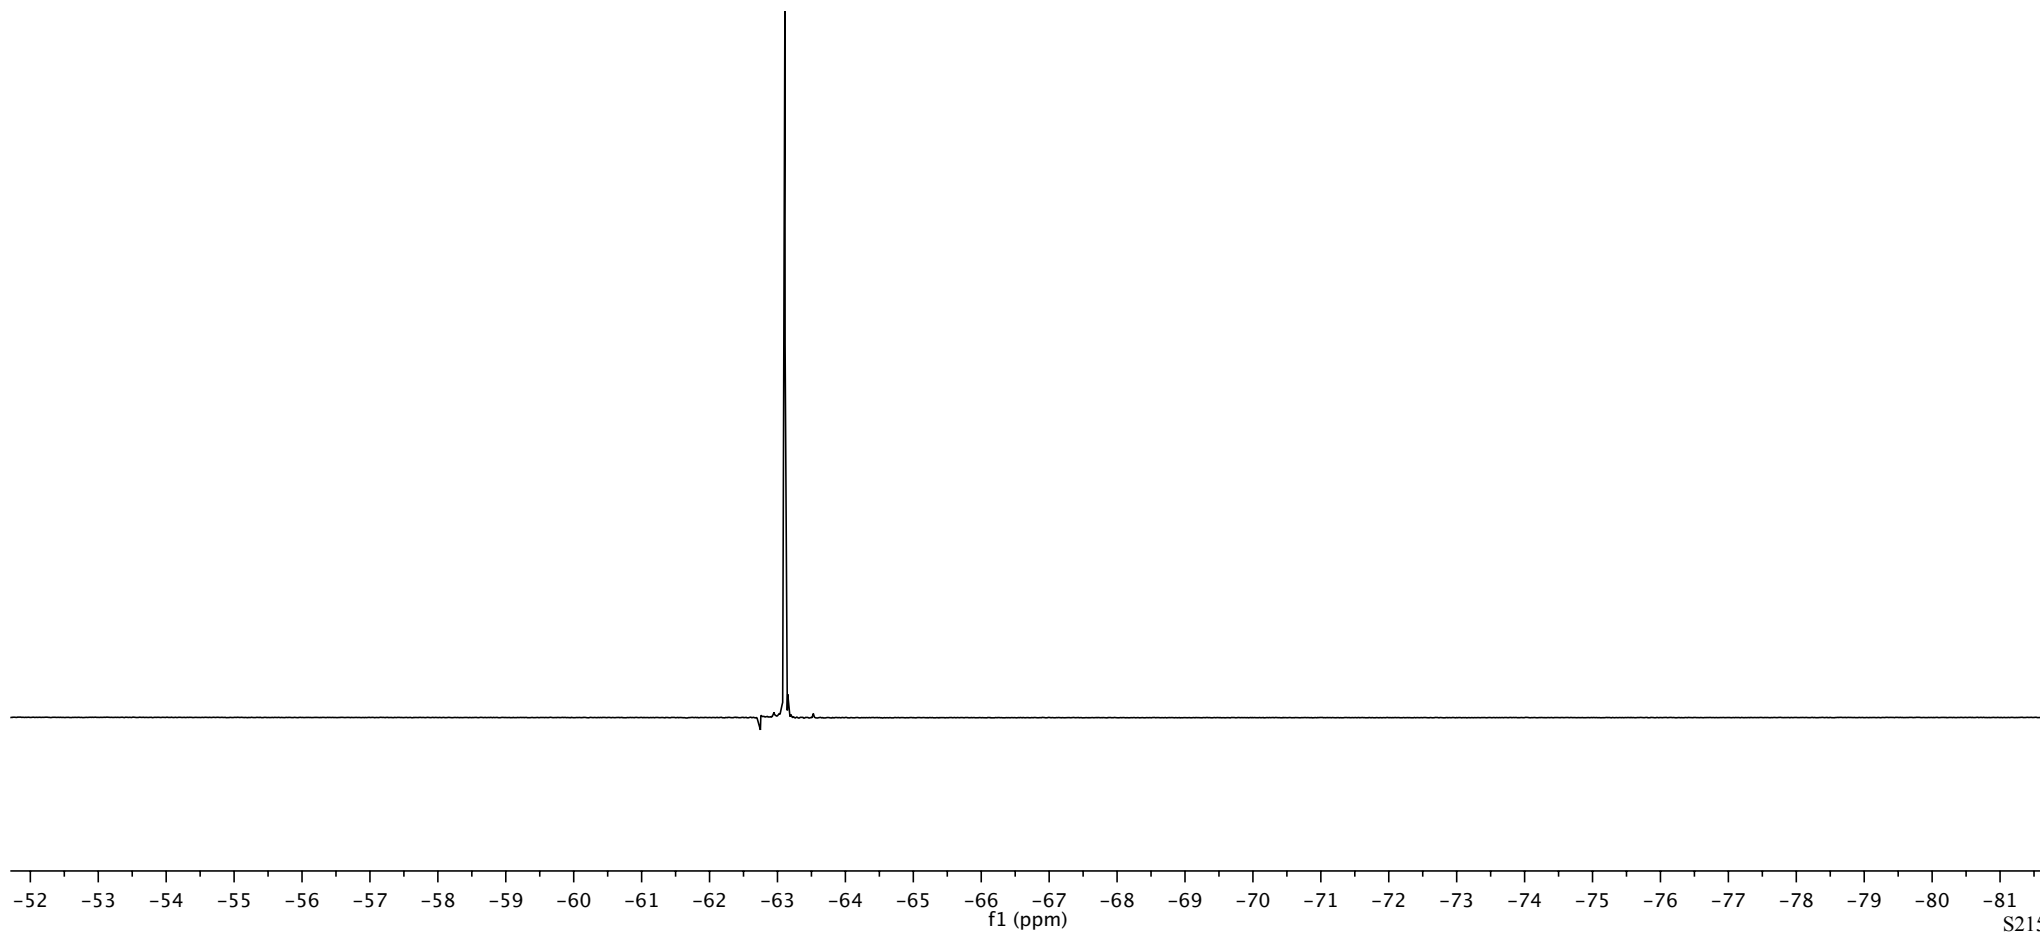



| Parameter              | Value          |
|------------------------|----------------|
| Origin                 | Varian         |
| Spectrometer           | inova          |
| Solvent                | CDCl3          |
| Temperature            | 20.0           |
| Pulse Sequence         | s2pul          |
| Experiment             | 1D             |
| Probe                  | hcn            |
| Number of Scans        | 16             |
| Receiver Gain          | 32             |
| Relaxation Delay       | 2.0000         |
| Pulse Width            | 0.0000         |
| Acquisition Time       | 4.0960         |
| Spectrometer Frequency | 500.07         |
| Spectral Width         | 8000.0         |
| Lowest Frequency       | -1521.1        |
| Nucleus                | <sup>1</sup> H |
| Acquired Size          | 32768          |
| Spectral Size          | 65536          |

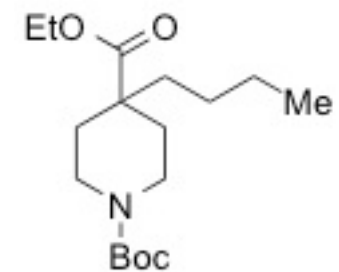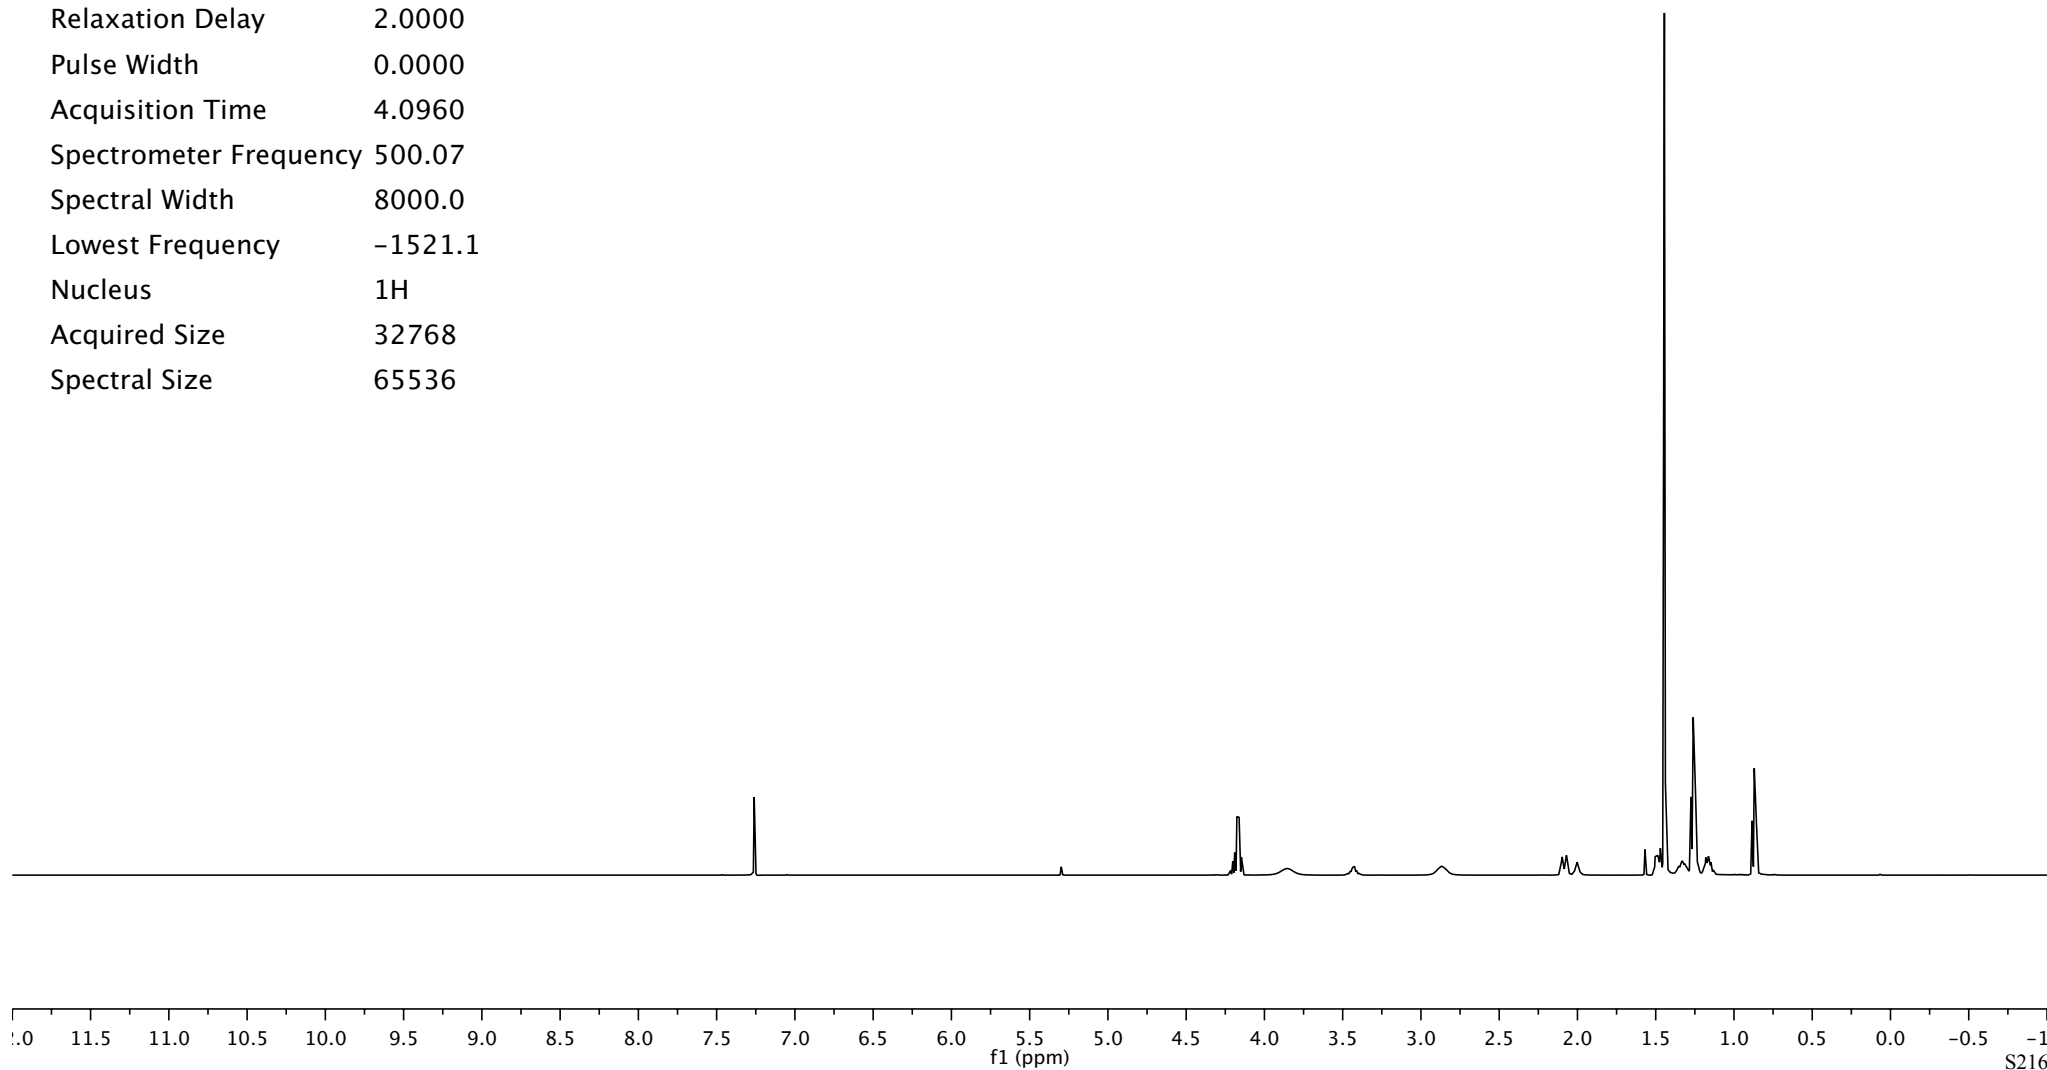

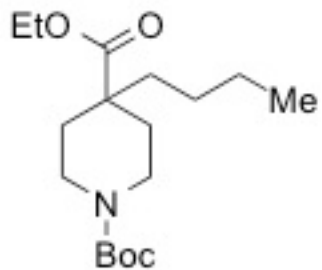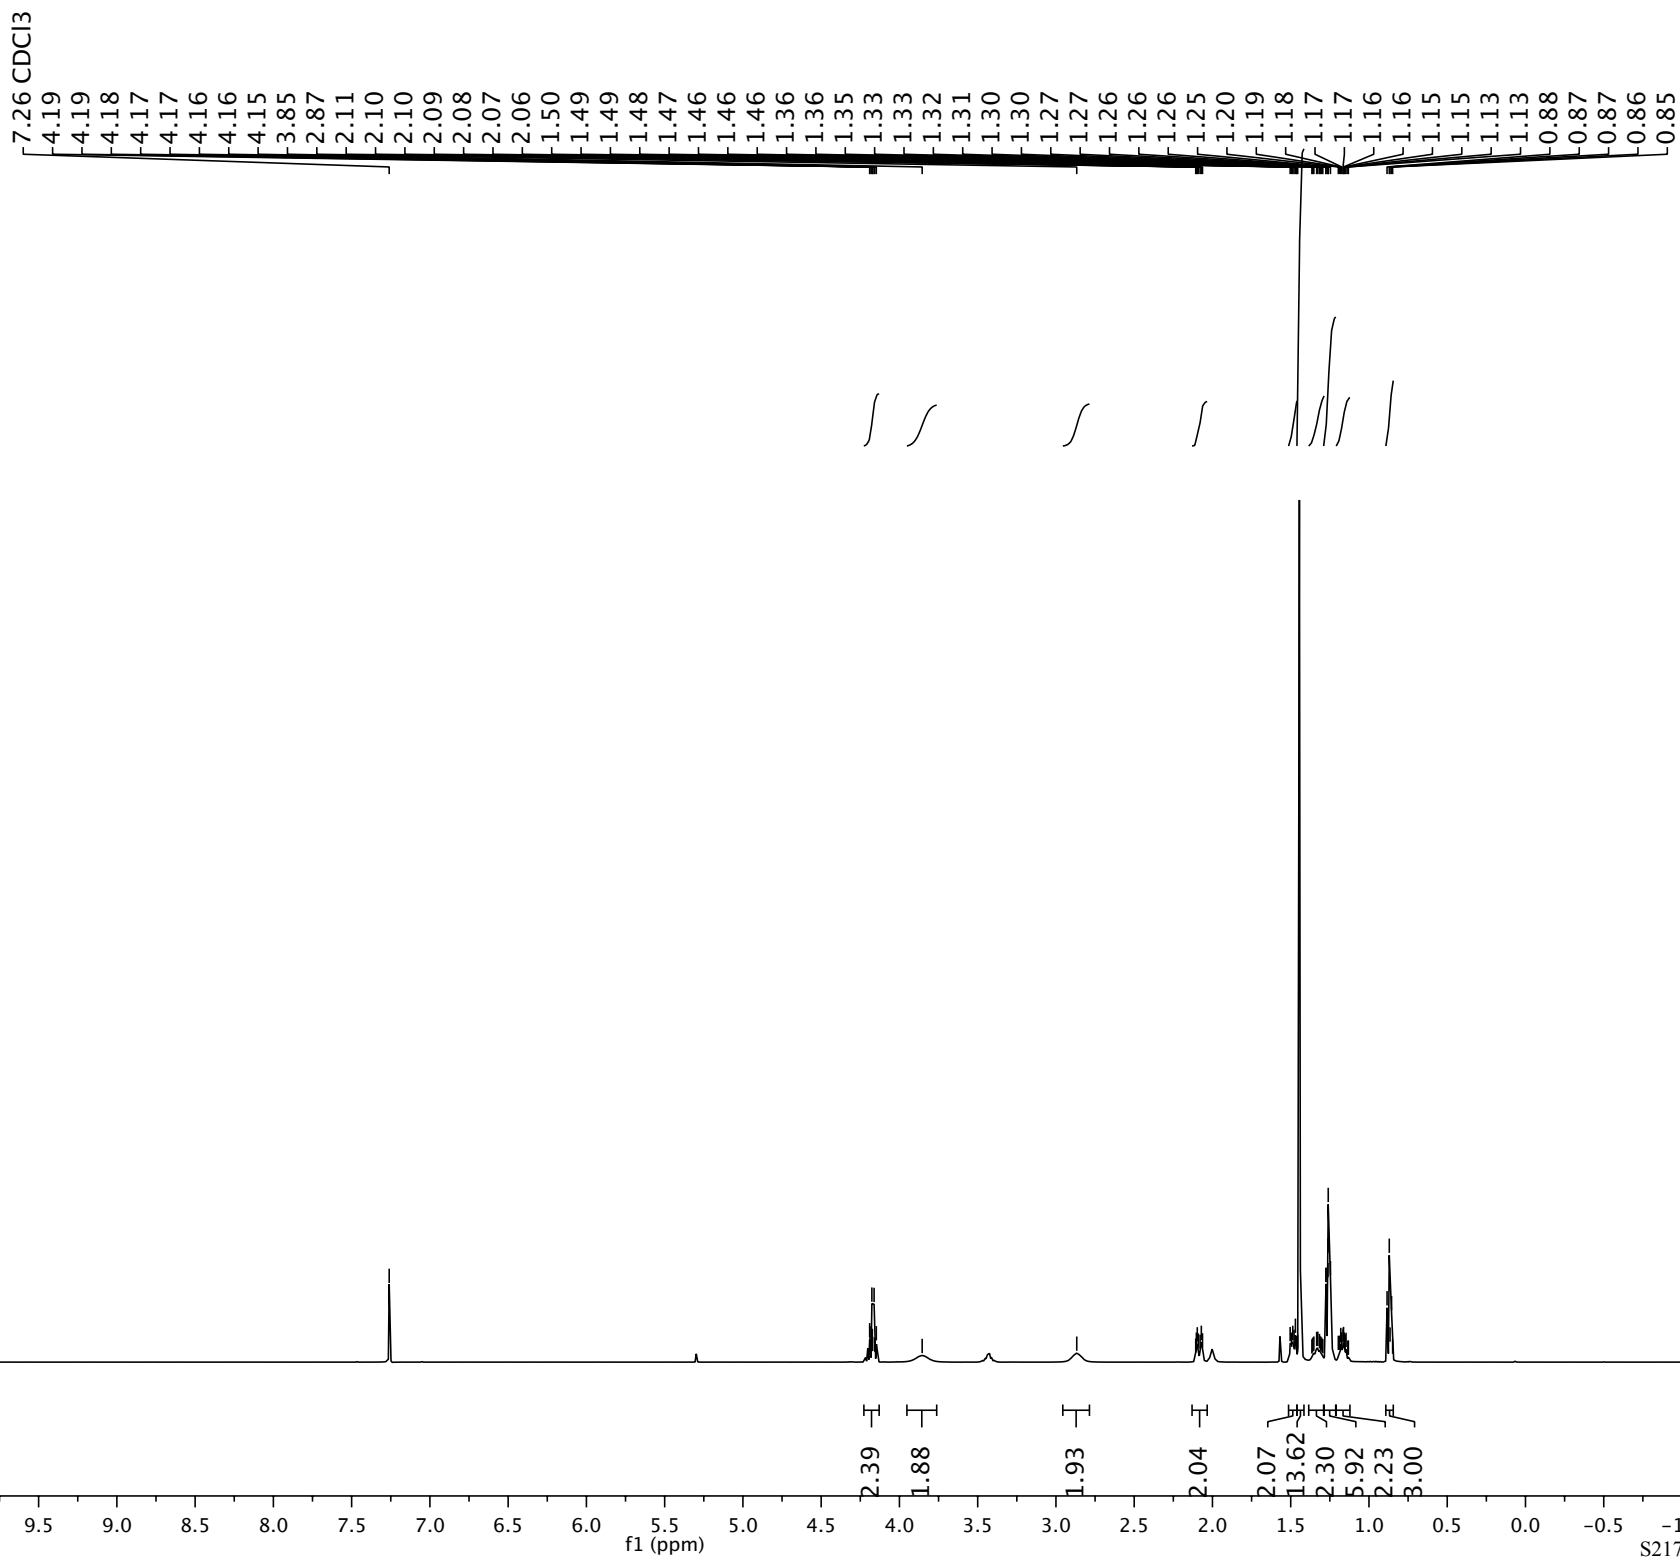

| Parameter              | Value   |
|------------------------|---------|
| Origin                 | Varian  |
| Spectrometer           | inova   |
| Solvent                | CDCl3   |
| Temperature            | 25.0    |
| Pulse Sequence         | s2pul   |
| Experiment             | 1D      |
| Probe                  | hcn     |
| Receiver Gain          | 32      |
| Relaxation Delay       | 0.0000  |
| Pulse Width            | 0.0000  |
| Acquisition Time       | 4.0960  |
| Spectrometer Frequency | 500.07  |
| Spectral Width         | 8000.0  |
| Lowest Frequency       | -1521.6 |
| Nucleus                | 1H      |
| Acquired Size          | 32768   |
| Spectral Size          | 65536   |

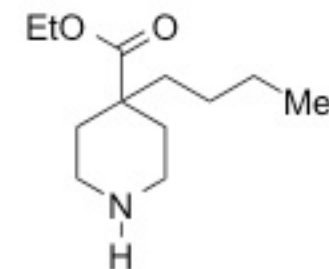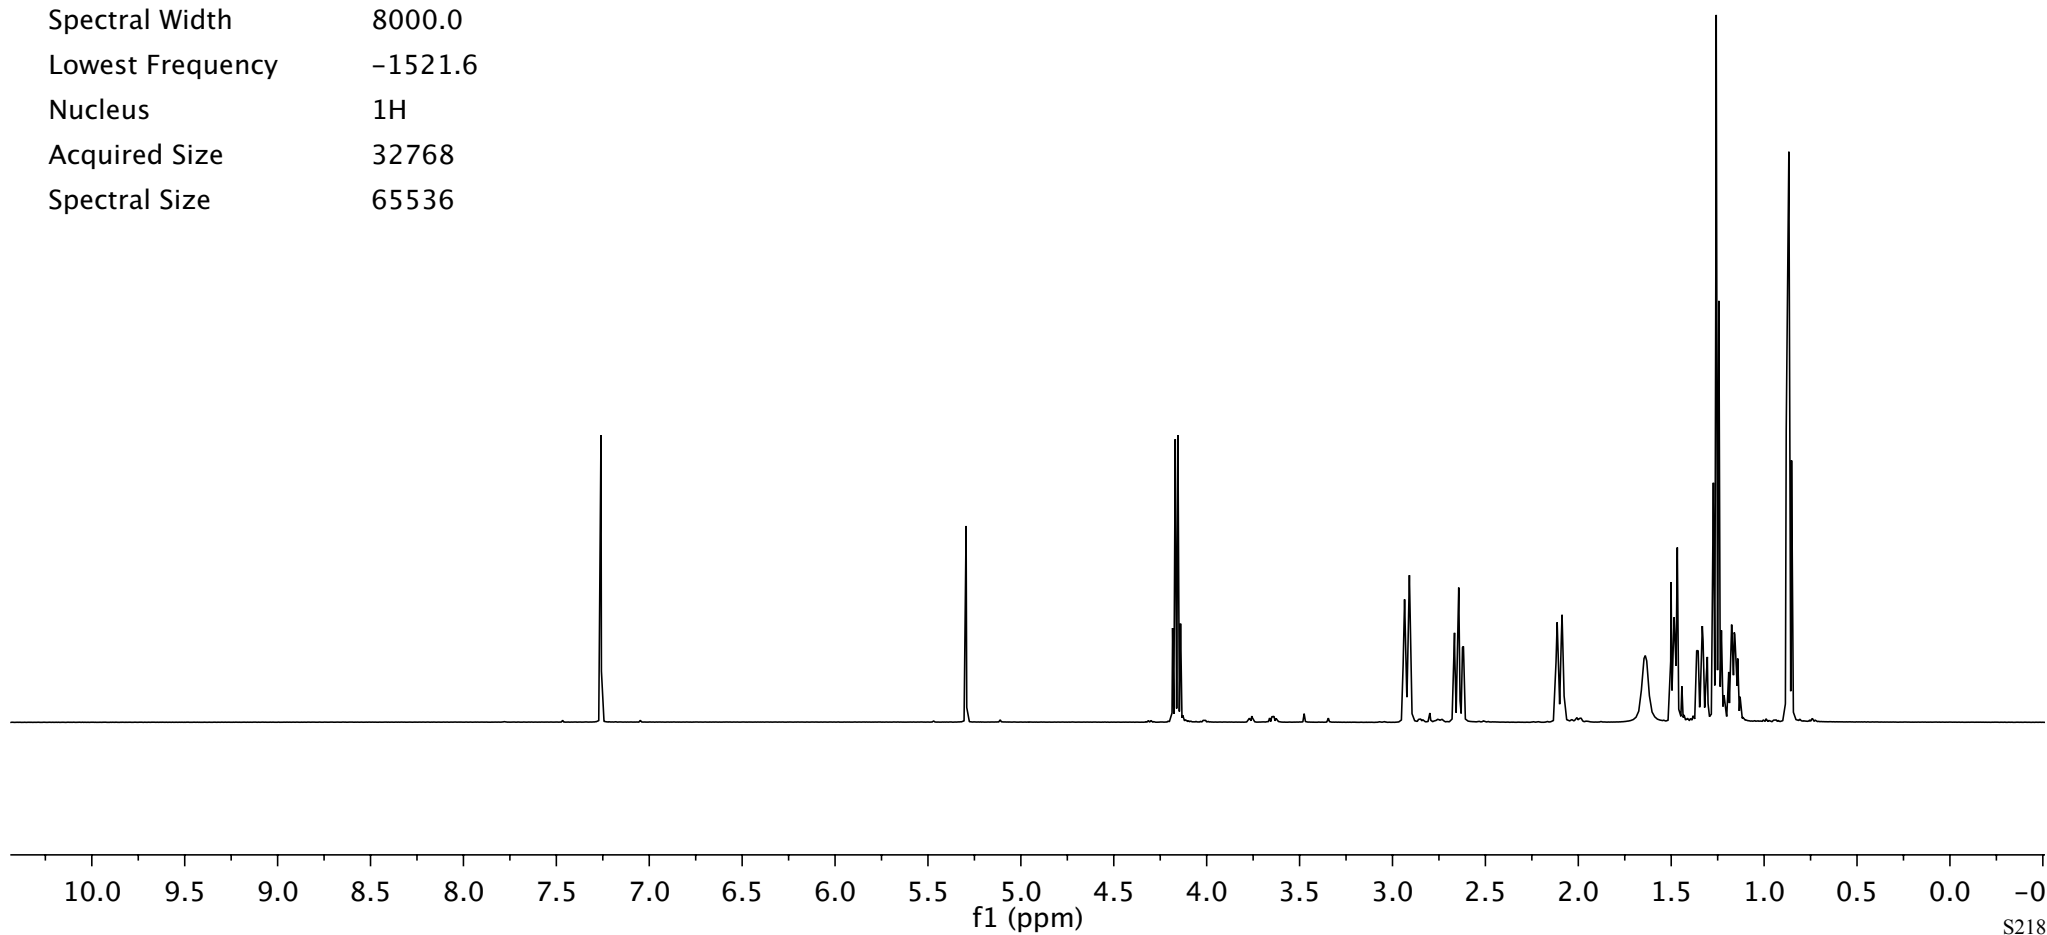

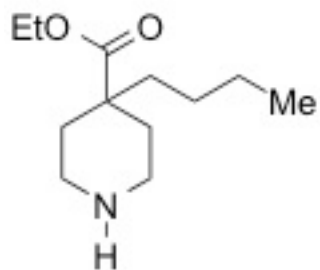

7.26 CDCl<sub>3</sub>  
 5.29 CH<sub>2</sub>Cl<sub>2</sub>  
 4.18  
 4.17  
 4.15  
 4.14  
 2.94  
 2.93  
 2.93  
 2.92  
 2.91  
 2.90  
 2.67  
 2.67  
 2.64  
 2.62  
 2.62  
 2.11  
 2.09  
 1.64  
 1.50  
 1.48  
 1.48  
 1.47  
 1.36  
 1.35  
 1.34  
 1.34  
 1.33  
 1.33  
 1.31  
 1.31  
 1.27  
 1.26  
 1.24  
 1.23  
 1.22  
 1.19  
 1.18  
 1.17  
 1.17  
 1.16  
 1.16  
 1.15  
 1.15  
 1.14  
 1.13  
 0.88  
 0.87  
 0.85

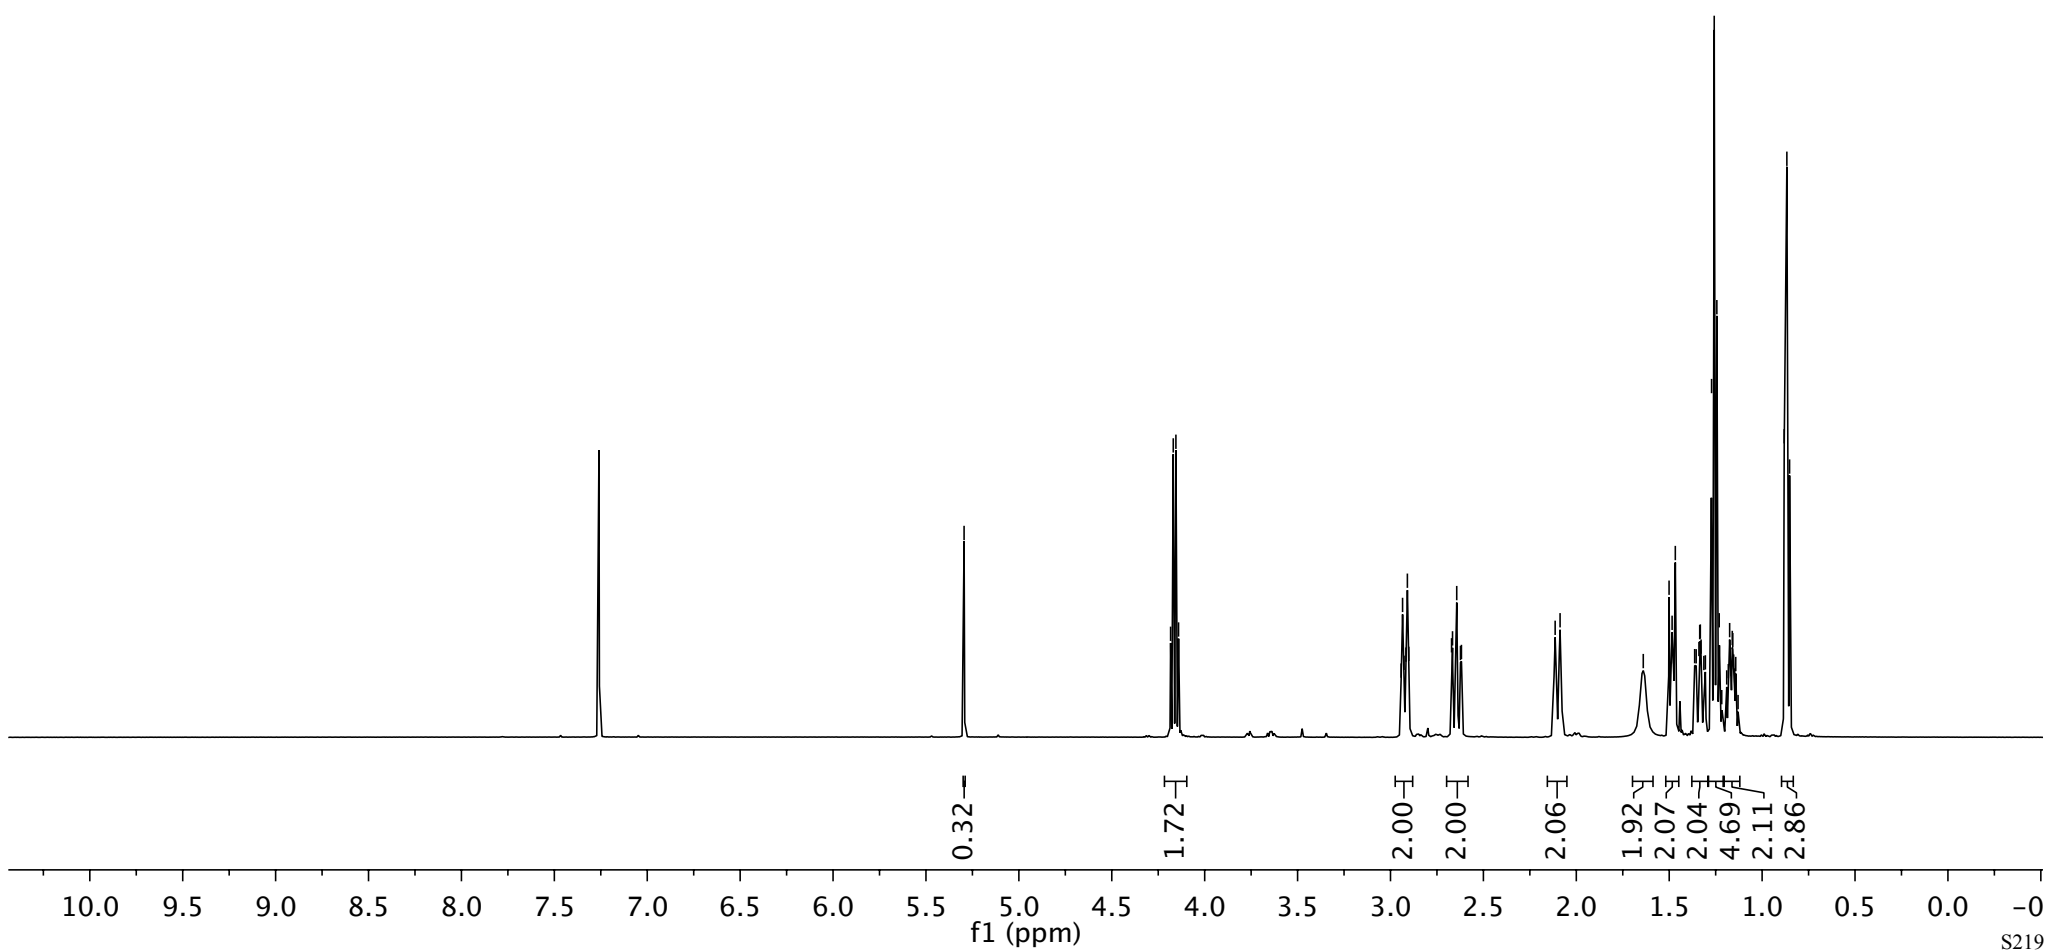

| Parameter              | Value   |
|------------------------|---------|
| Origin                 | Varian  |
| Spectrometer           | inova   |
| Solvent                | CDCl3   |
| Temperature            | 20.0    |
| Pulse Sequence         | s2pul   |
| Experiment             | 1D      |
| Probe                  | quad94  |
| Receiver Gain          | 60      |
| Relaxation Delay       | 2.0000  |
| Pulse Width            | 0.0000  |
| Acquisition Time       | 1.3107  |
| Spectrometer Frequency | 100.58  |
| Spectral Width         | 25000.0 |
| Lowest Frequency       | -1025.5 |
| Nucleus                | 13C     |
| Acquired Size          | 32768   |
| Spectral Size          | 65536   |

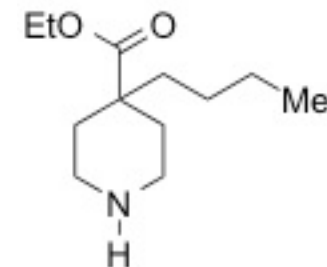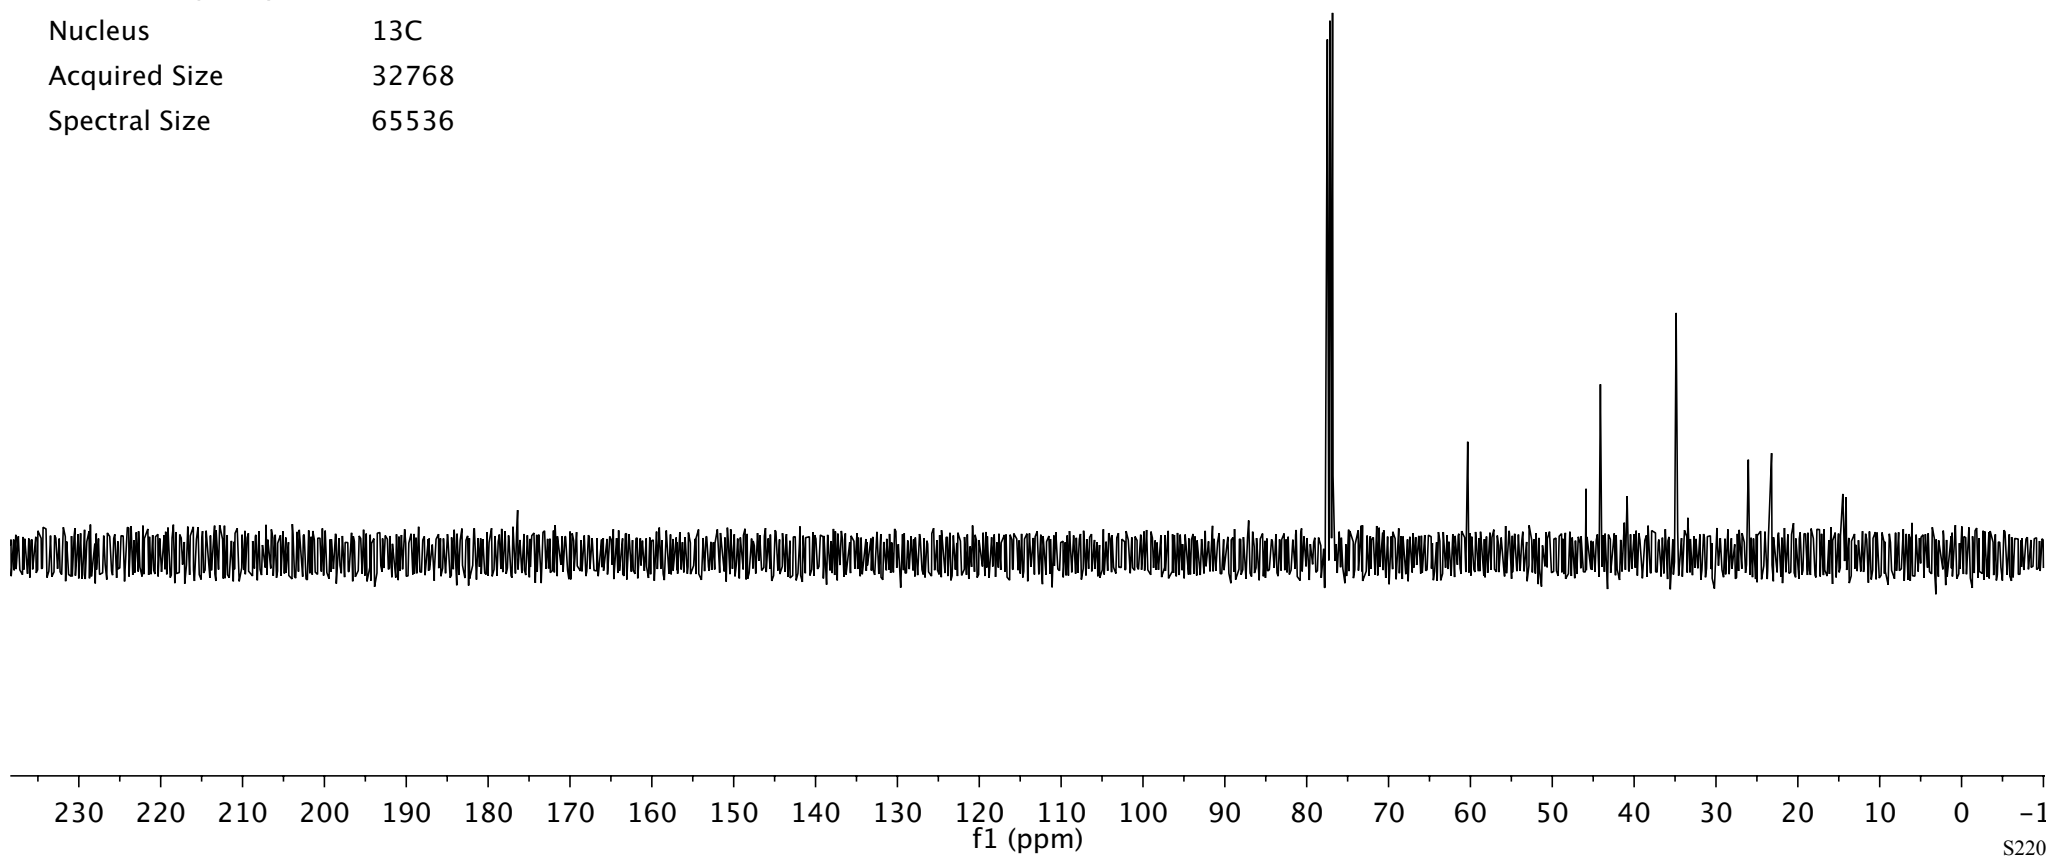



—176.39

77.48 CDCl<sub>3</sub>  
77.16 CDCl<sub>3</sub>  
76.84 CDCl<sub>3</sub>

—60.33

~45.87

~44.12

~40.87

~34.87

~26.05

~23.21

~14.51

~14.08

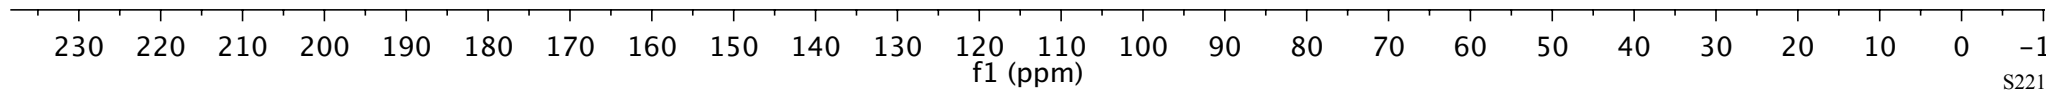

| Parameter              | Value          |
|------------------------|----------------|
| Origin                 | Varian         |
| Spectrometer           | inova          |
| Solvent                | CDCl3          |
| Temperature            | 19.0           |
| Pulse Sequence         | s2pul          |
| Experiment             | 1D             |
| Probe                  | QUADG          |
| Receiver Gain          | 54             |
| Relaxation Delay       | 0.0000         |
| Pulse Width            | 0.0000         |
| Acquisition Time       | 4.0960         |
| Spectrometer Frequency | 499.43         |
| Spectral Width         | 8000.0         |
| Lowest Frequency       | -1518.7        |
| Nucleus                | <sup>1</sup> H |
| Acquired Size          | 32768          |
| Spectral Size          | 65536          |

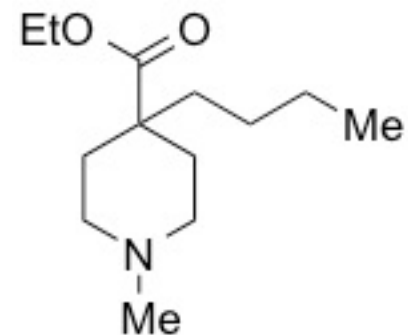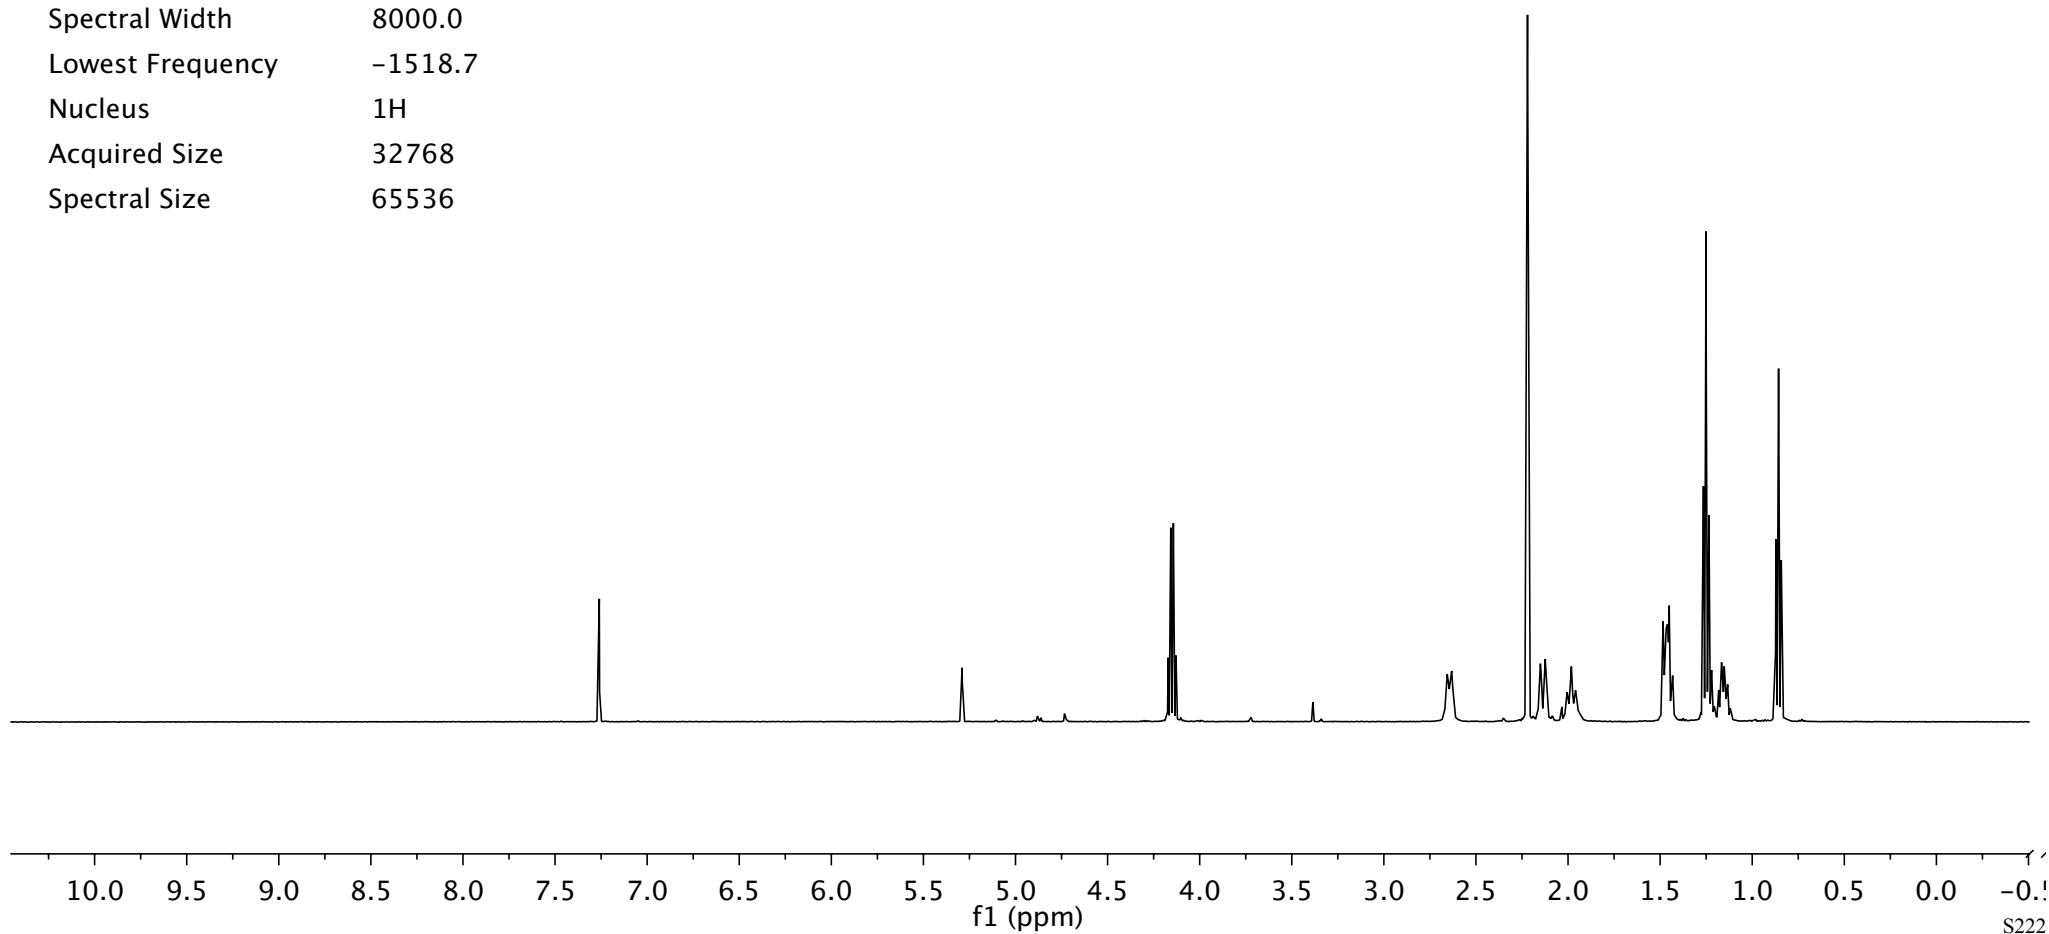

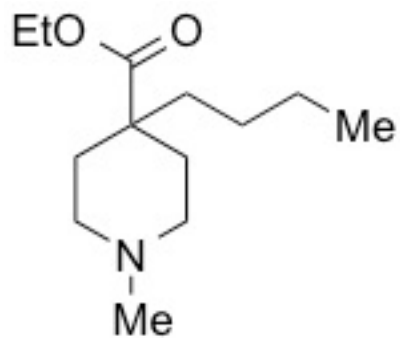

—7.26 CDCl<sub>3</sub>

—5.29 CH<sub>2</sub>Cl<sub>2</sub>

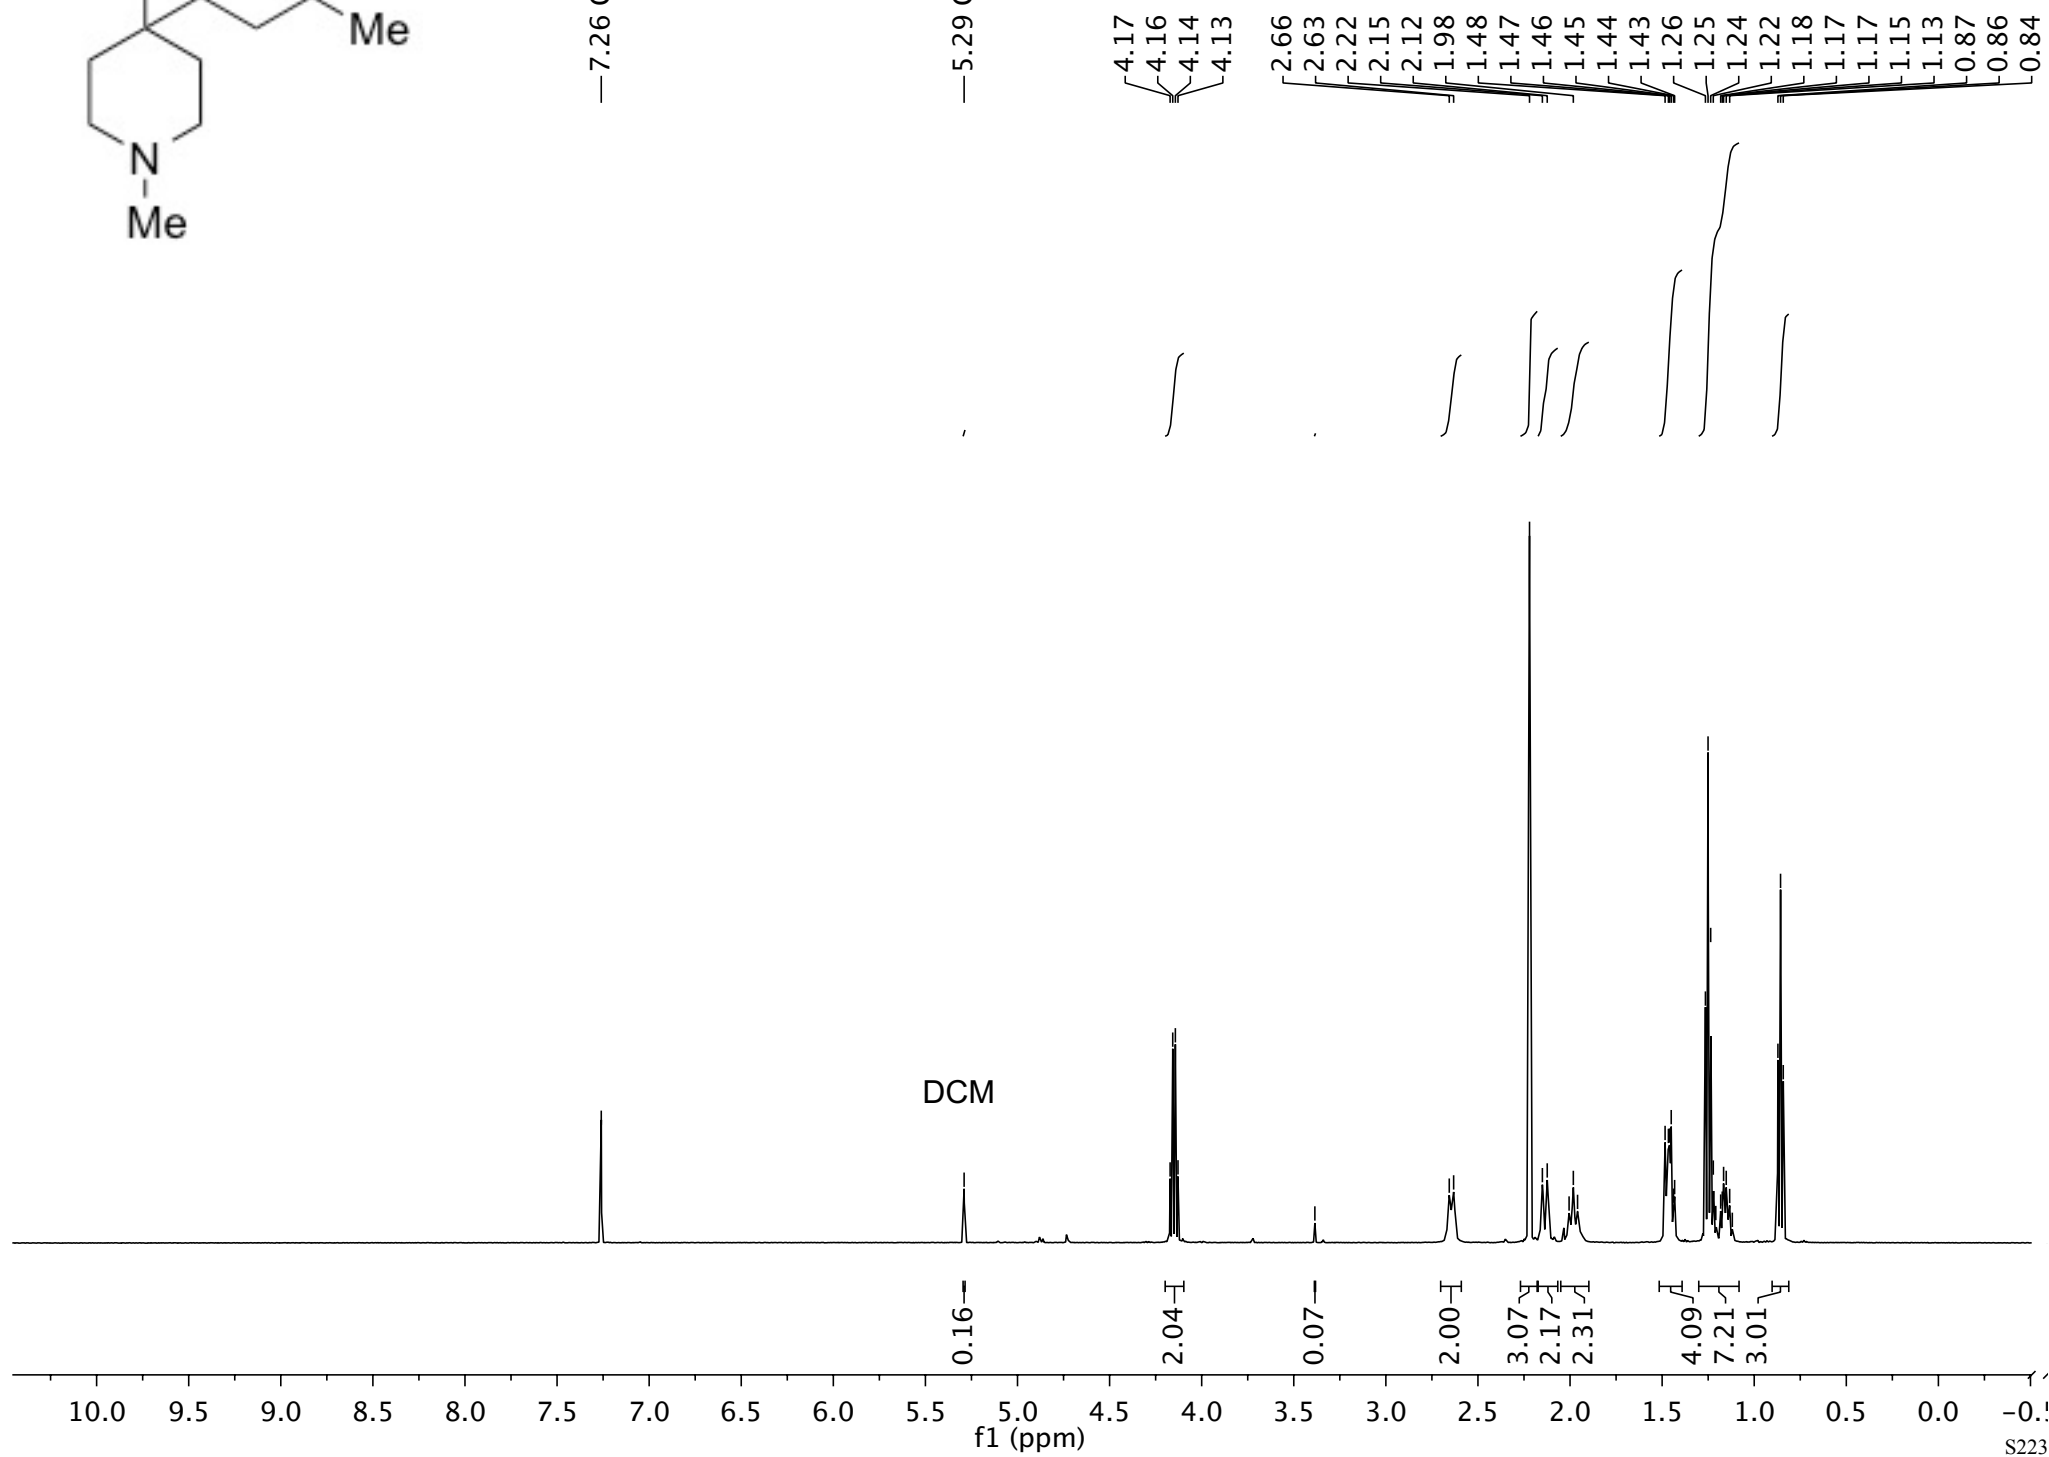



| Parameter              | Value           |
|------------------------|-----------------|
| Origin                 | Varian          |
| Spectrometer           | inova           |
| Solvent                | CDCl3           |
| Temperature            | 20.0            |
| Pulse Sequence         | s2pul           |
| Experiment             | 1D              |
| Probe                  | QUAD            |
| Receiver Gain          | 60              |
| Relaxation Delay       | 2.0000          |
| Pulse Width            | 0.0000          |
| Acquisition Time       | 1.0863          |
| Spectrometer Frequency | 125.66          |
| Spectral Width         | 30165.9         |
| Lowest Frequency       | -1272.5         |
| Nucleus                | <sup>13</sup> C |
| Acquired Size          | 32768           |
| Spectral Size          | 65536           |

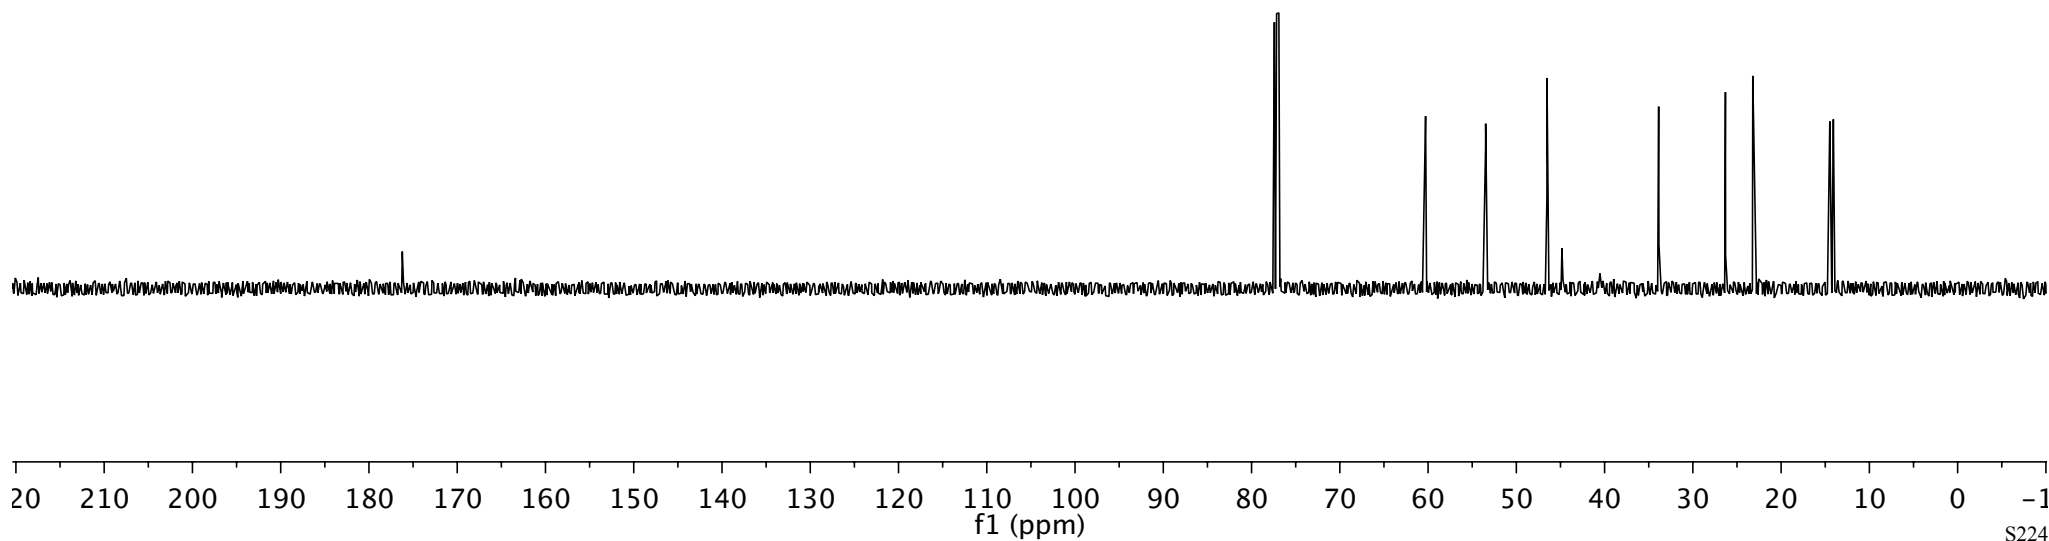

—176.22

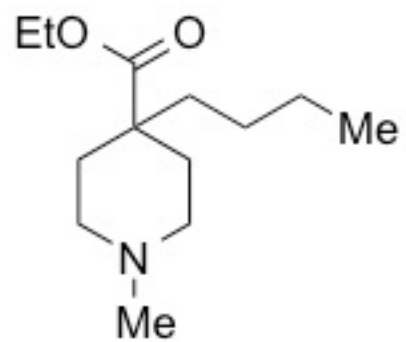

77.41 CDCl<sub>3</sub>  
77.16 CDCl<sub>3</sub>  
76.91 CDCl<sub>3</sub>

60.28  
53.48  
46.53  
44.84  
40.53  
33.87

26.31  
23.21

14.48  
14.08

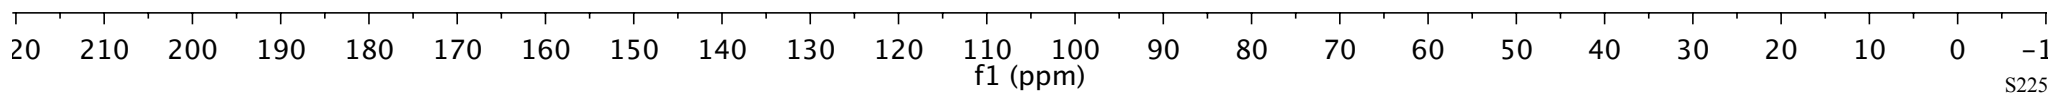

| Parameter              | Value             |
|------------------------|-------------------|
| Origin                 | Varian            |
| Spectrometer           | inova             |
| Solvent                | CDCl <sub>3</sub> |
| Temperature            | 20.0              |
| Pulse Sequence         | s2pul             |
| Experiment             | 1D                |
| Probe                  | hcn               |
| Number of Scans        | 16                |
| Receiver Gain          | 32                |
| Relaxation Delay       | 10.0000           |
| Pulse Width            | 0.0000            |
| Acquisition Time       | 4.0960            |
| Spectrometer Frequency | 500.07            |
| Spectral Width         | 8000.0            |
| Lowest Frequency       | -1511.1           |
| Nucleus                | <sup>1</sup> H    |
| Acquired Size          | 32768             |
| Spectral Size          | 65536             |

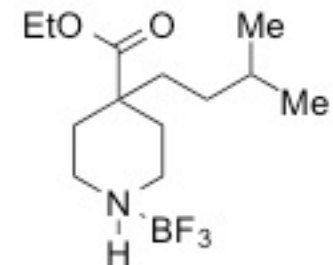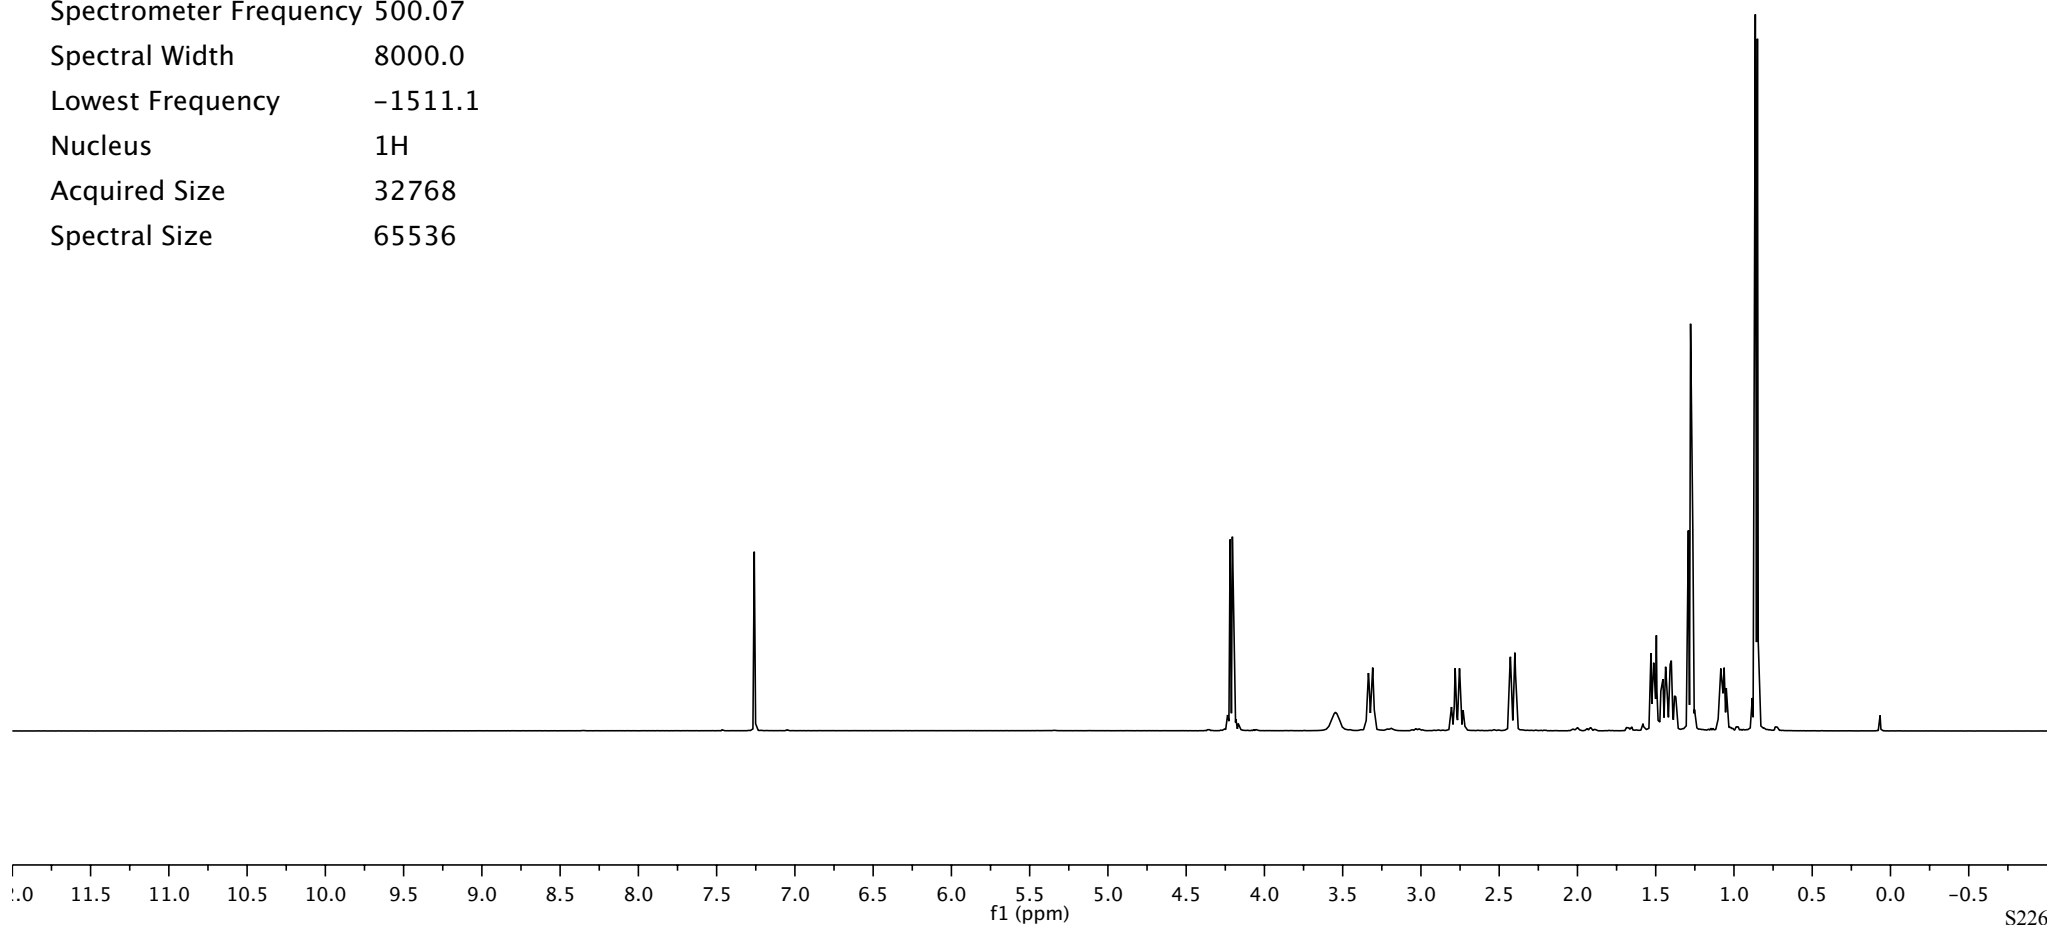

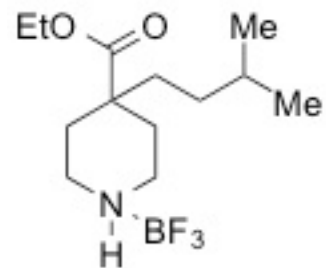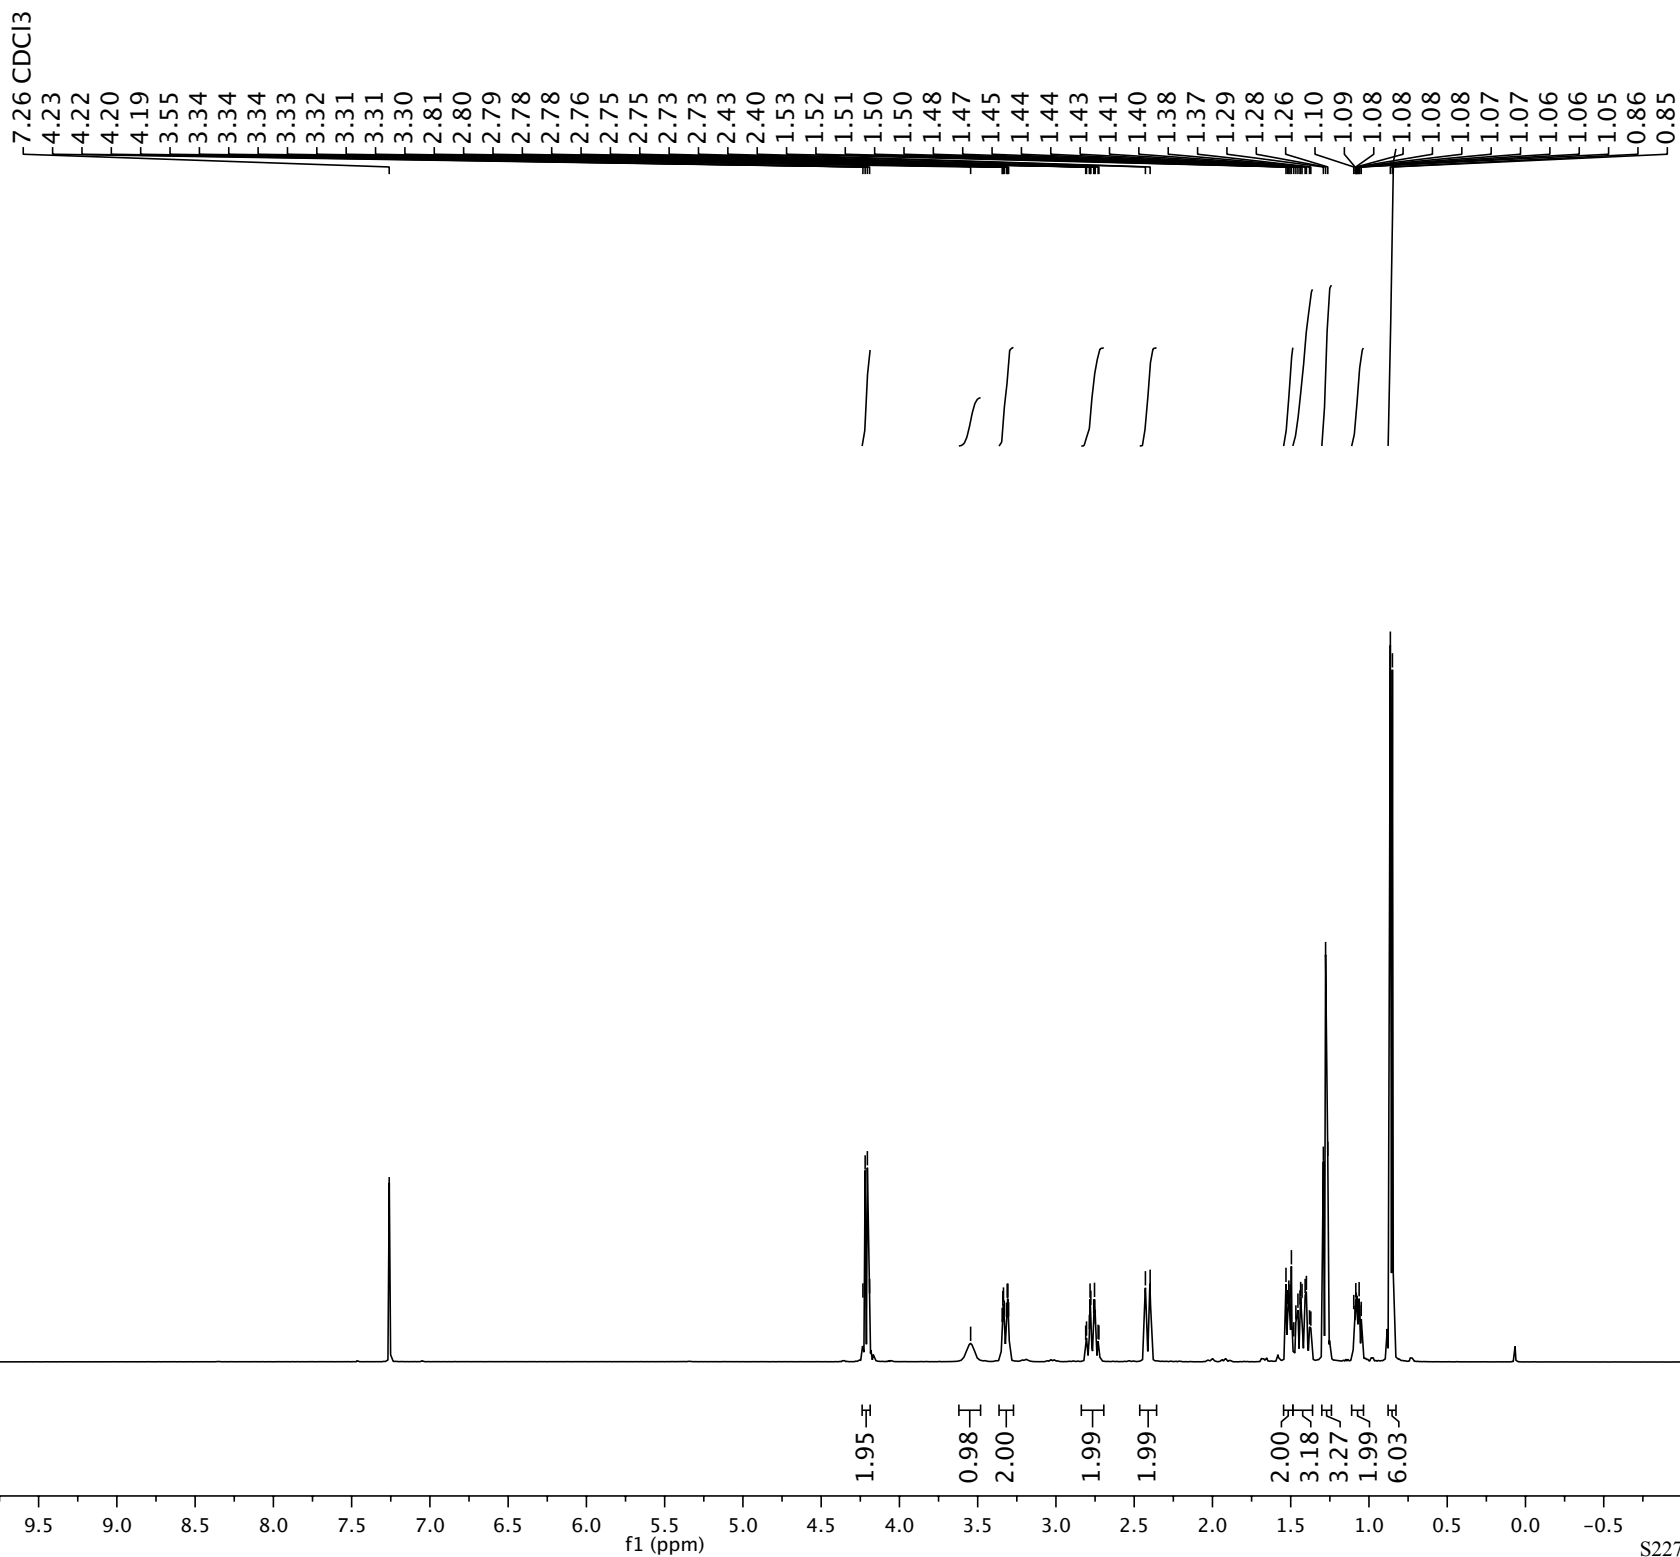

| Parameter              | Value             |
|------------------------|-------------------|
| Origin                 | Varian            |
| Spectrometer           | inova             |
| Solvent                | CDCl <sub>3</sub> |
| Temperature            | 25.0              |
| Pulse Sequence         | s2pul             |
| Experiment             | 1D                |
| Probe                  | QUADG             |
| Number of Scans        | 520               |
| Receiver Gain          | 60                |
| Relaxation Delay       | 2.0000            |
| Pulse Width            | 0.0000            |
| Acquisition Time       | 1.0240            |
| Spectrometer Frequency | 125.60            |
| Spectral Width         | 32000.0           |
| Lowest Frequency       | -2200.0           |
| Nucleus                | <sup>13</sup> C   |
| Acquired Size          | 32768             |
| Spectral Size          | 65536             |

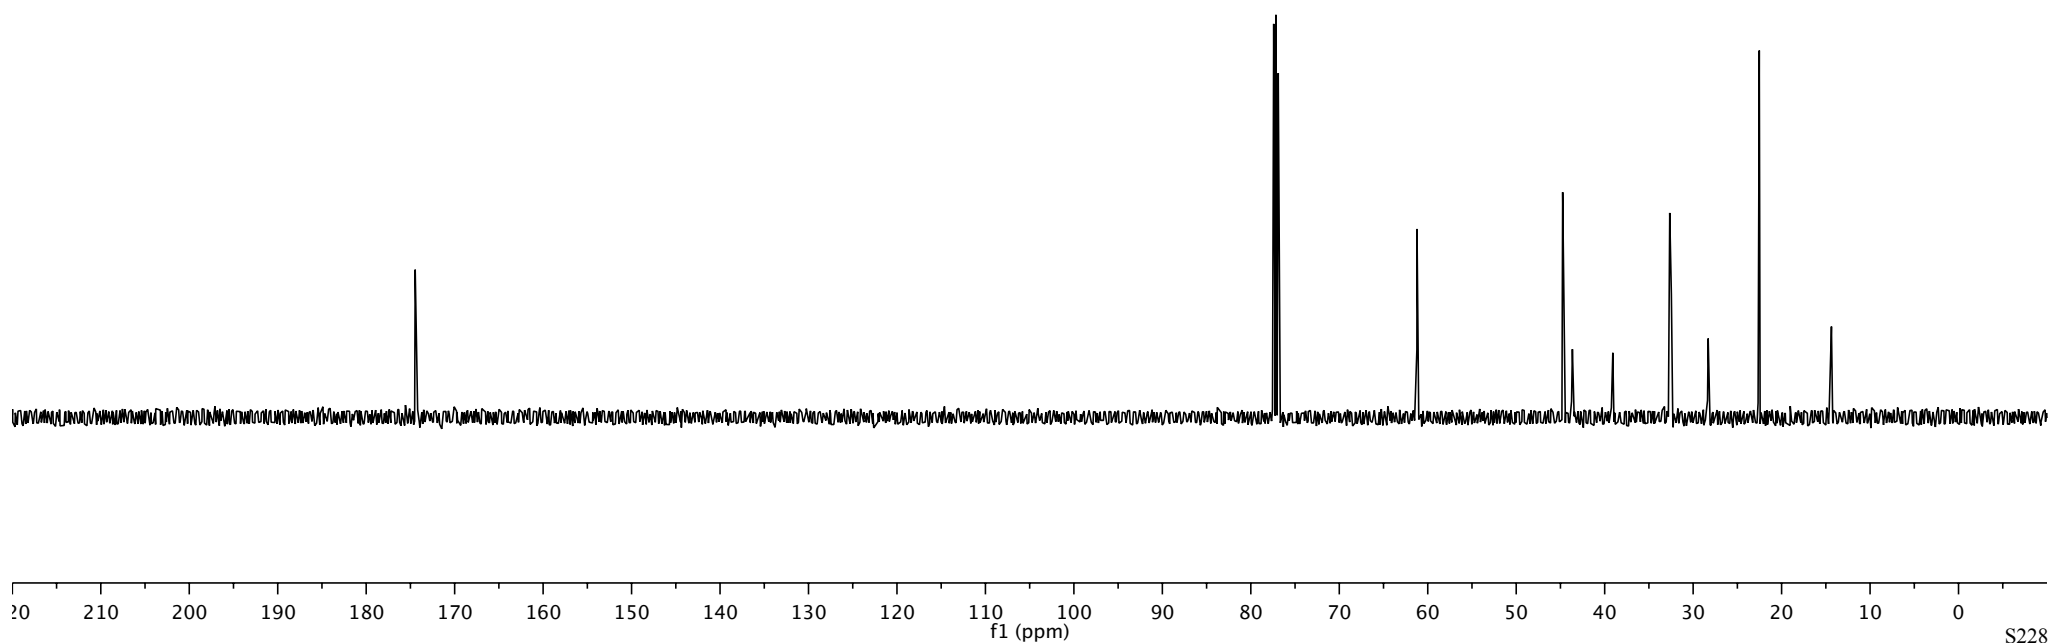

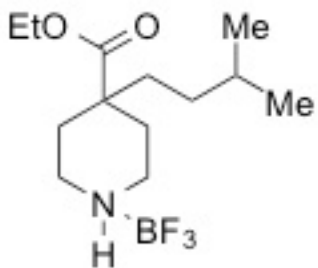

—174.46

—77.16 CDCl<sub>3</sub>

—61.21

—44.75

—43.65

—39.09

—32.65

—32.47

—28.29

—22.53

—14.41

—14.37

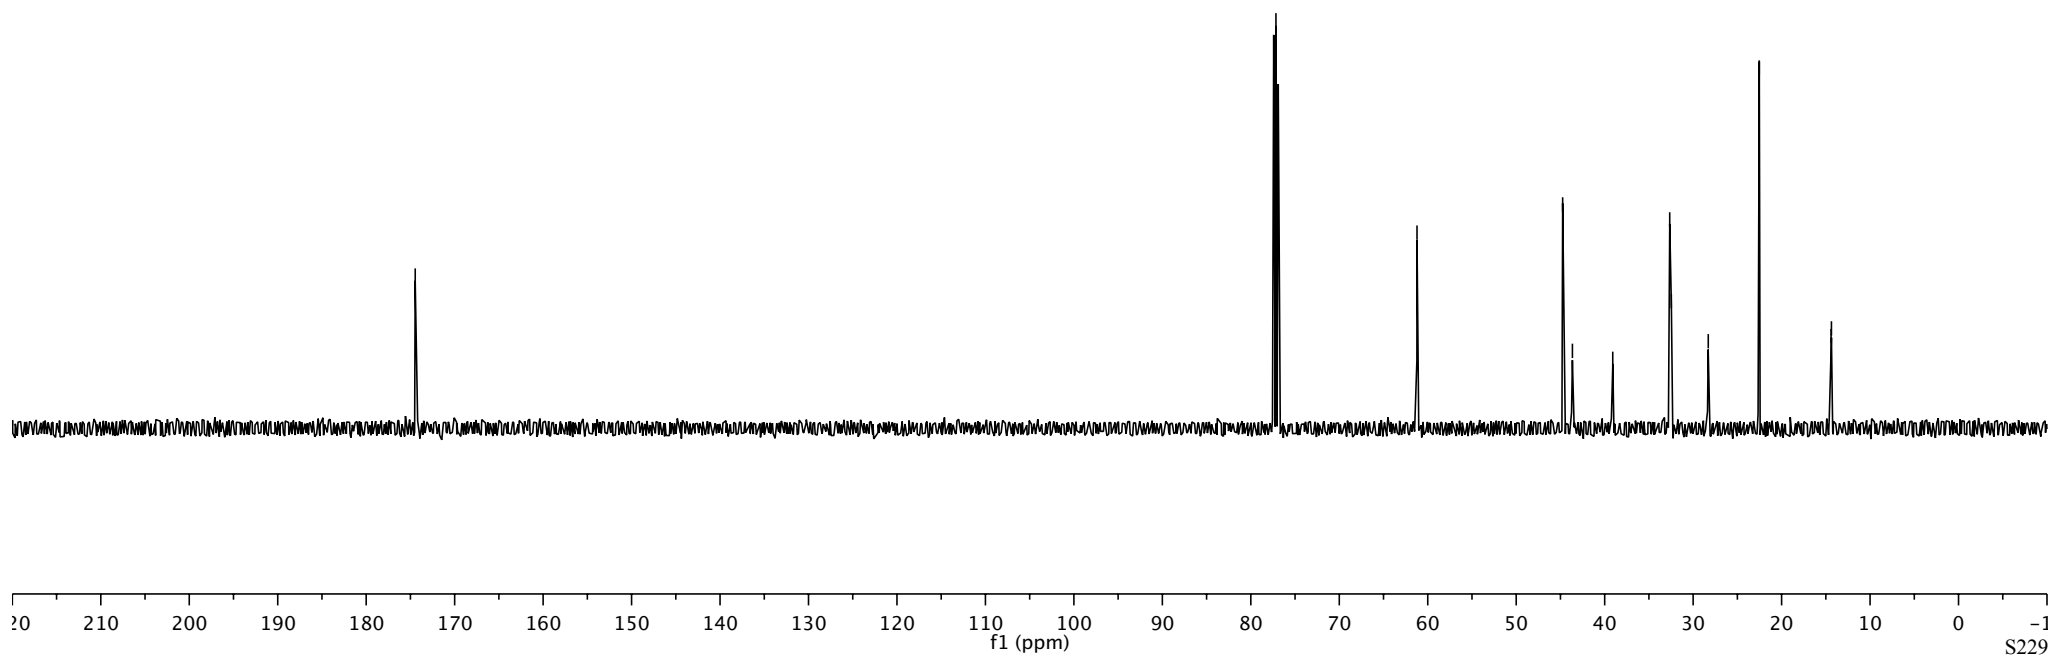

| Parameter              | Value           |
|------------------------|-----------------|
| Origin                 | Varian          |
| Spectrometer           | inova           |
| Solvent                | CDCl3           |
| Temperature            | 25.0            |
| Pulse Sequence         | s2pul           |
| Experiment             | 1D              |
| Probe                  | QUAD            |
| Number of Scans        | 120             |
| Receiver Gain          | 48              |
| Relaxation Delay       | 0.0000          |
| Pulse Width            | 0.0000          |
| Acquisition Time       | 0.3277          |
| Spectrometer Frequency | 470.15          |
| Spectral Width         | 100000.0        |
| Lowest Frequency       | -79531.9        |
| Nucleus                | <sup>19</sup> F |
| Acquired Size          | 32768           |
| Spectral Size          | 65536           |

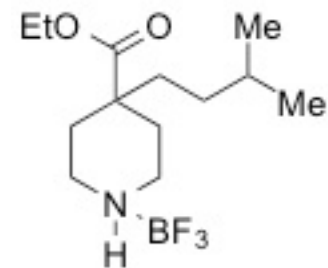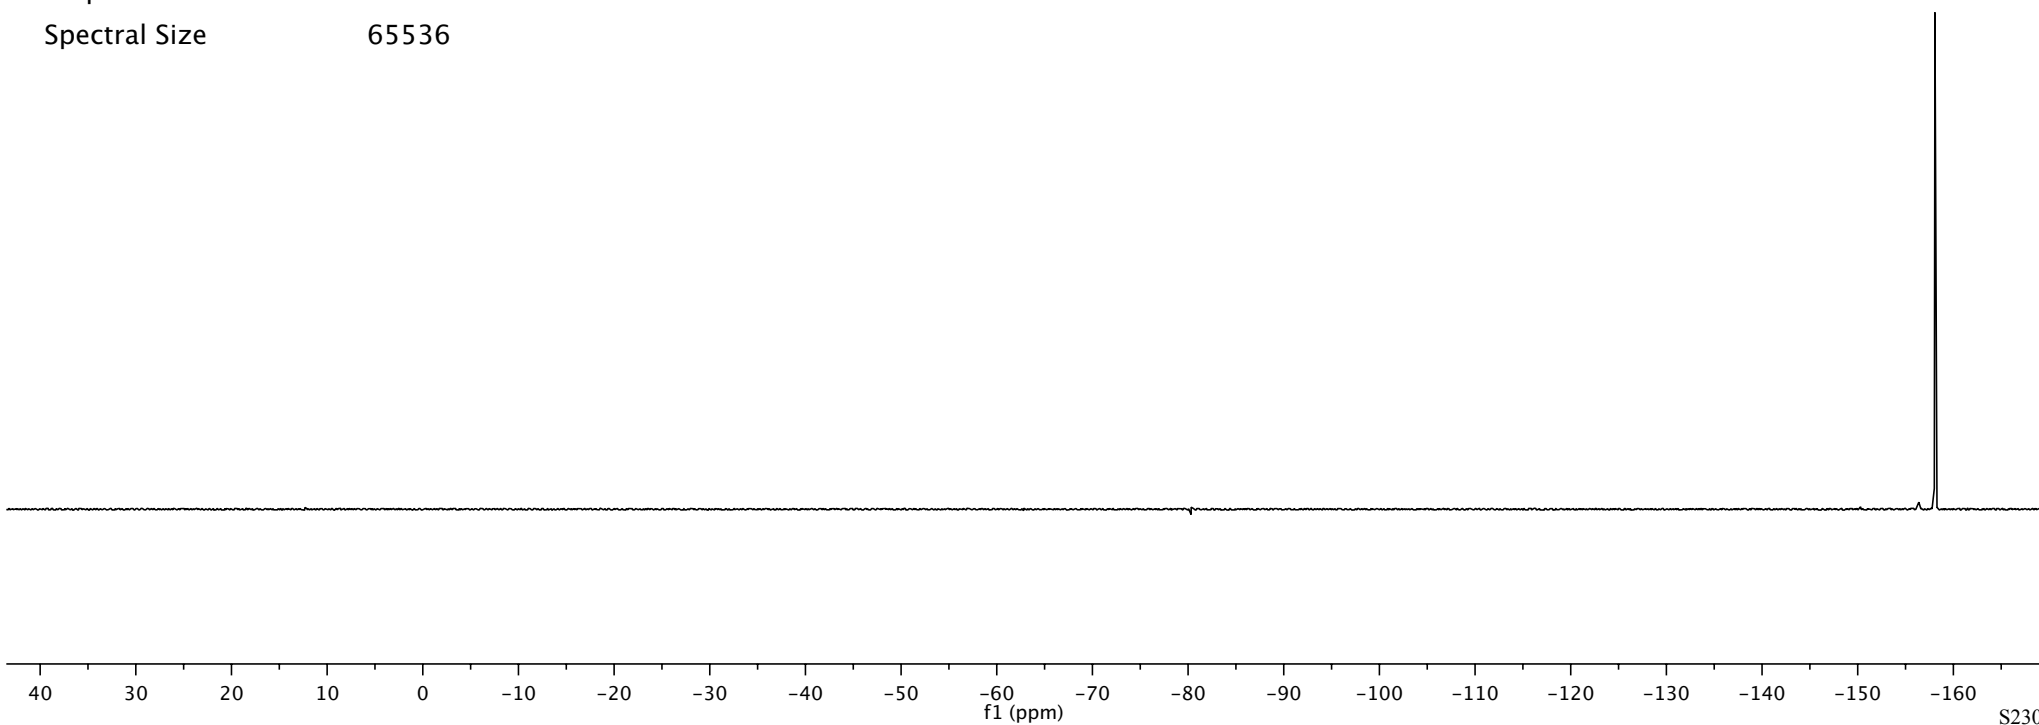

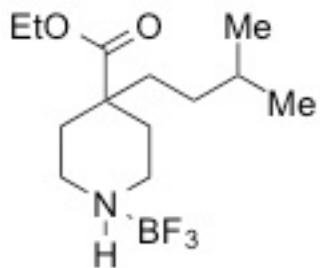

-158.07  
-158.10  
-158.14  
-158.17

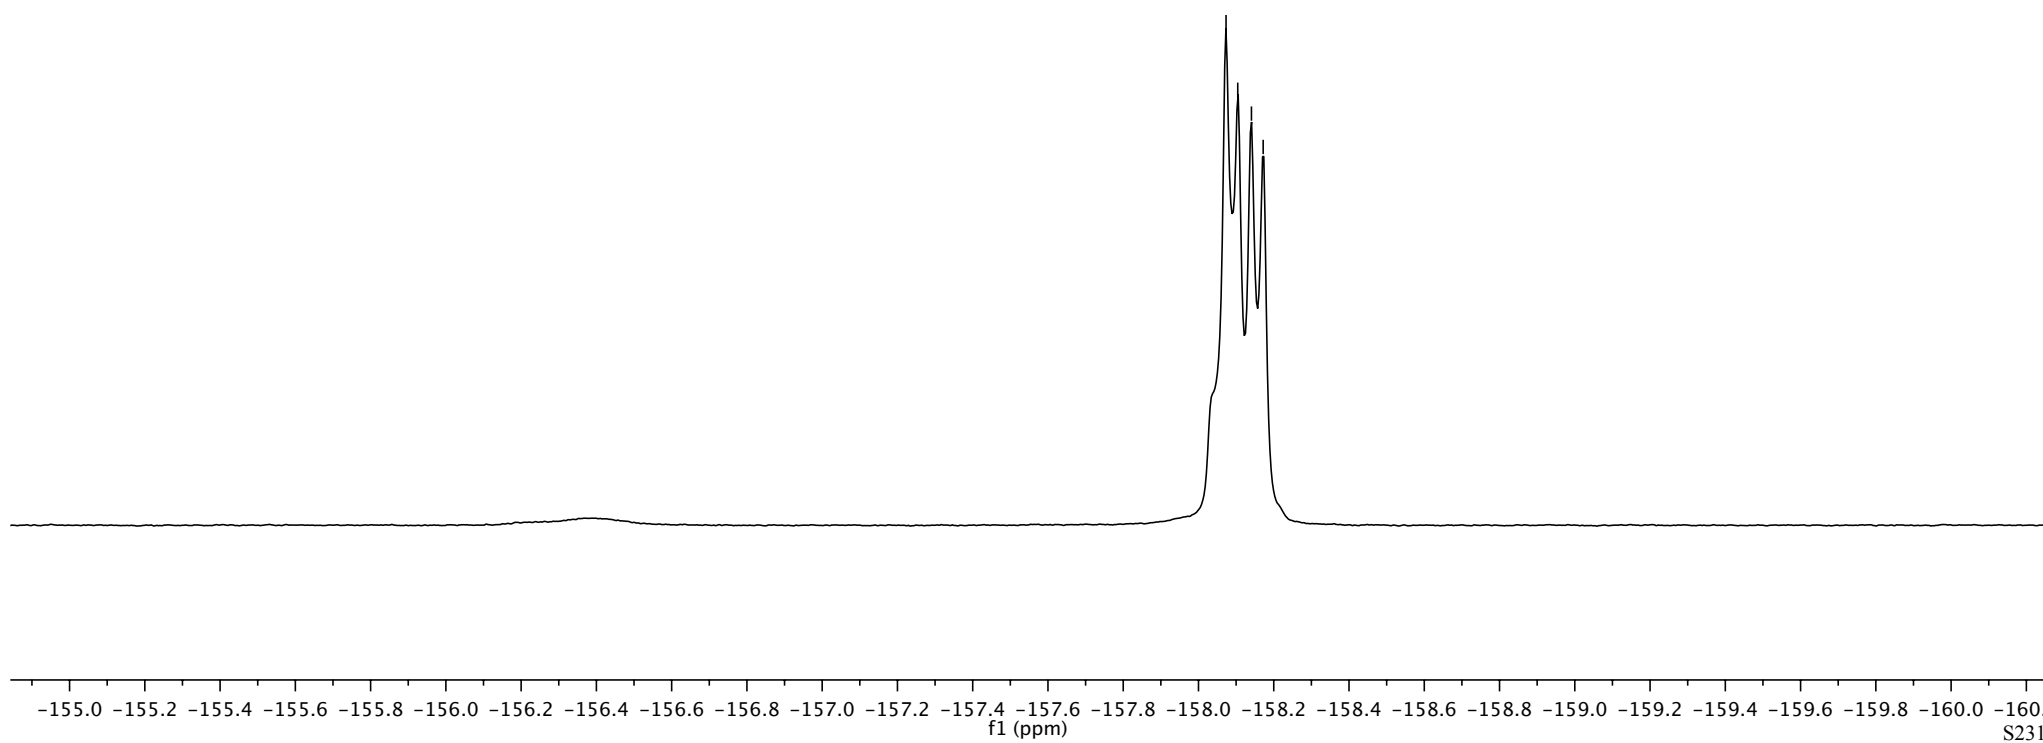



| Parameter              | Value    |
|------------------------|----------|
| Origin                 | Varian   |
| Spectrometer           | inova    |
| Solvent                | CDCl3    |
| Temperature            | 20.0     |
| Pulse Sequence         | s2pul    |
| Experiment             | 1D       |
| Probe                  | quadbp   |
| Number of Scans        | 16       |
| Receiver Gain          | 58       |
| Relaxation Delay       | 0.0000   |
| Pulse Width            | 0.0000   |
| Acquisition Time       | 0.6554   |
| Spectrometer Frequency | 128.25   |
| Spectral Width         | 50000.0  |
| Lowest Frequency       | -25560.0 |
| Nucleus                | 11B      |
| Acquired Size          | 32768    |
| Spectral Size          | 65536    |

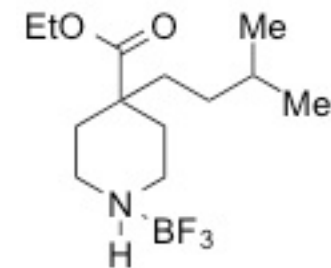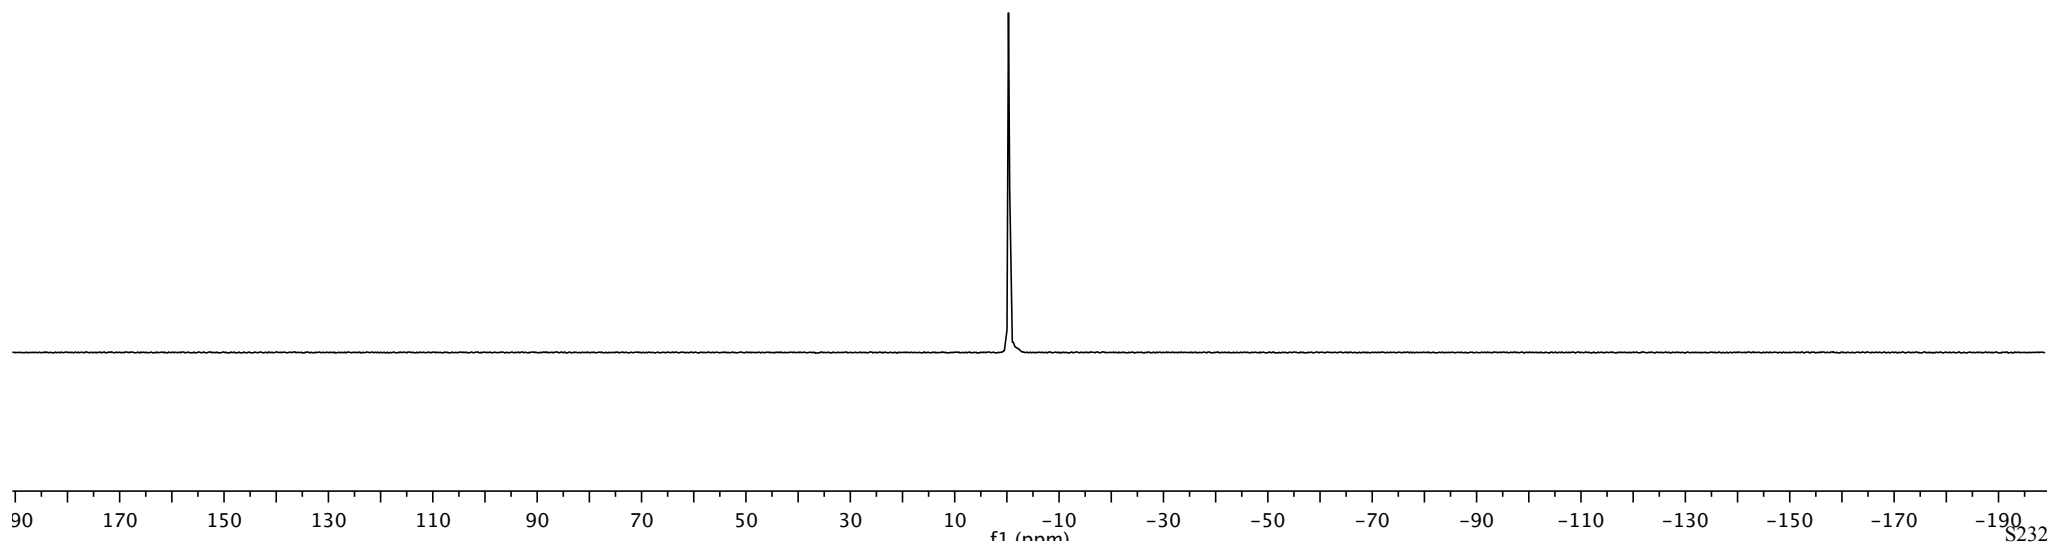

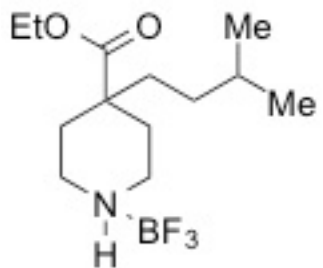

--0.17  
--0.30  
--0.43  
--0.55

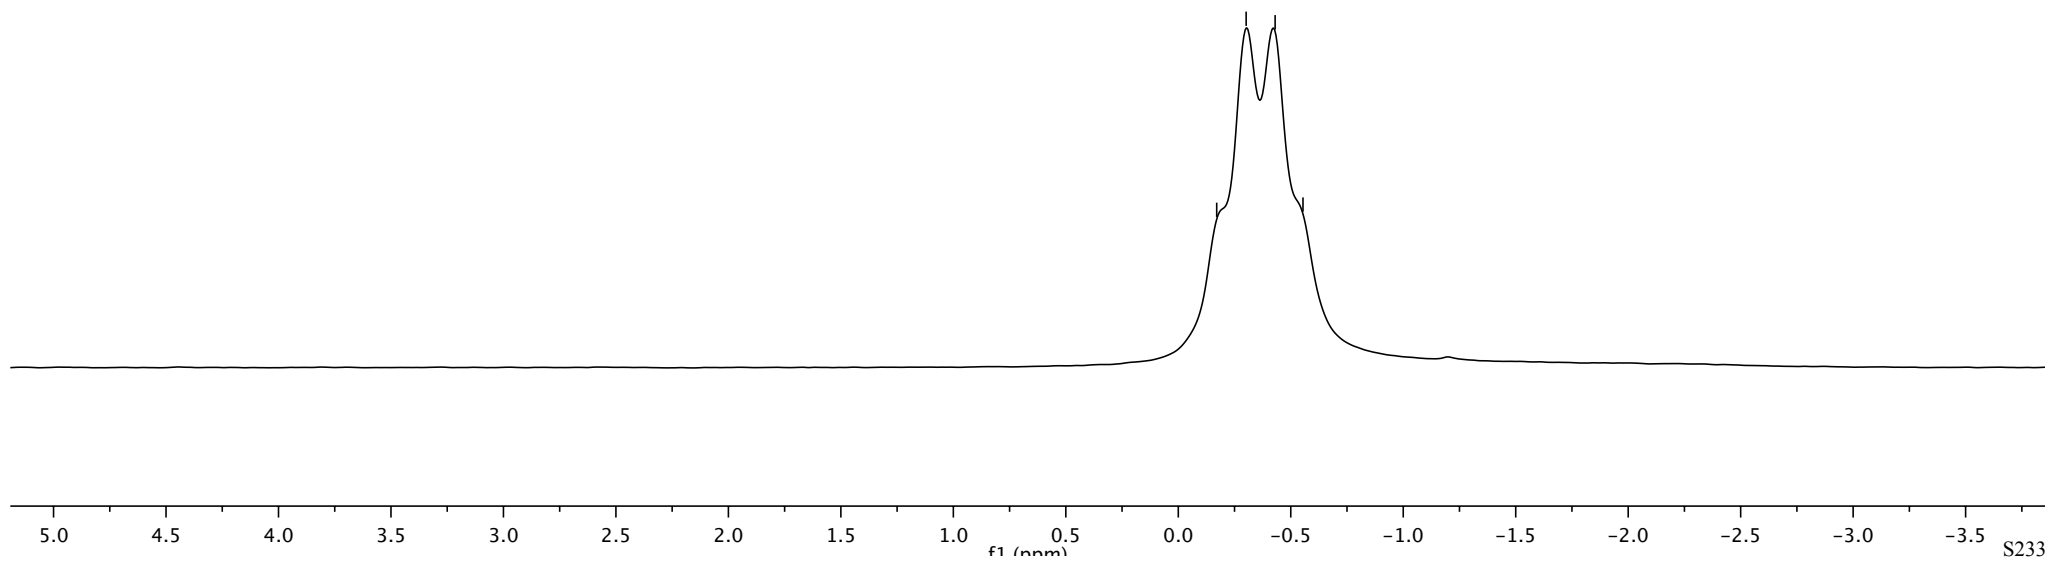

| Parameter              | Value        |
|------------------------|--------------|
| Origin                 | Varian       |
| Spectrometer           | inova        |
| Solvent                | CD3CN        |
| Temperature            | 25.0         |
| Pulse Sequence         | s2pul        |
| Experiment             | 1D           |
| Probe                  | QUAD         |
| Number of Scans        | 8            |
| Receiver Gain          | 36           |
| Relaxation Delay       | 0.0000       |
| Pulse Width            | 0.0000       |
| Acquisition Time       | 4.6645       |
| Spectrometer Frequency | 499.70       |
| Spectral Width         | 7024.9       |
| Lowest Frequency       | -1023.9      |
| Nucleus                | $^1\text{H}$ |
| Acquired Size          | 32768        |
| Spectral Size          | 65536        |

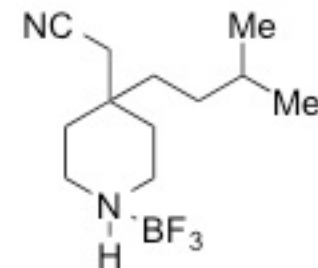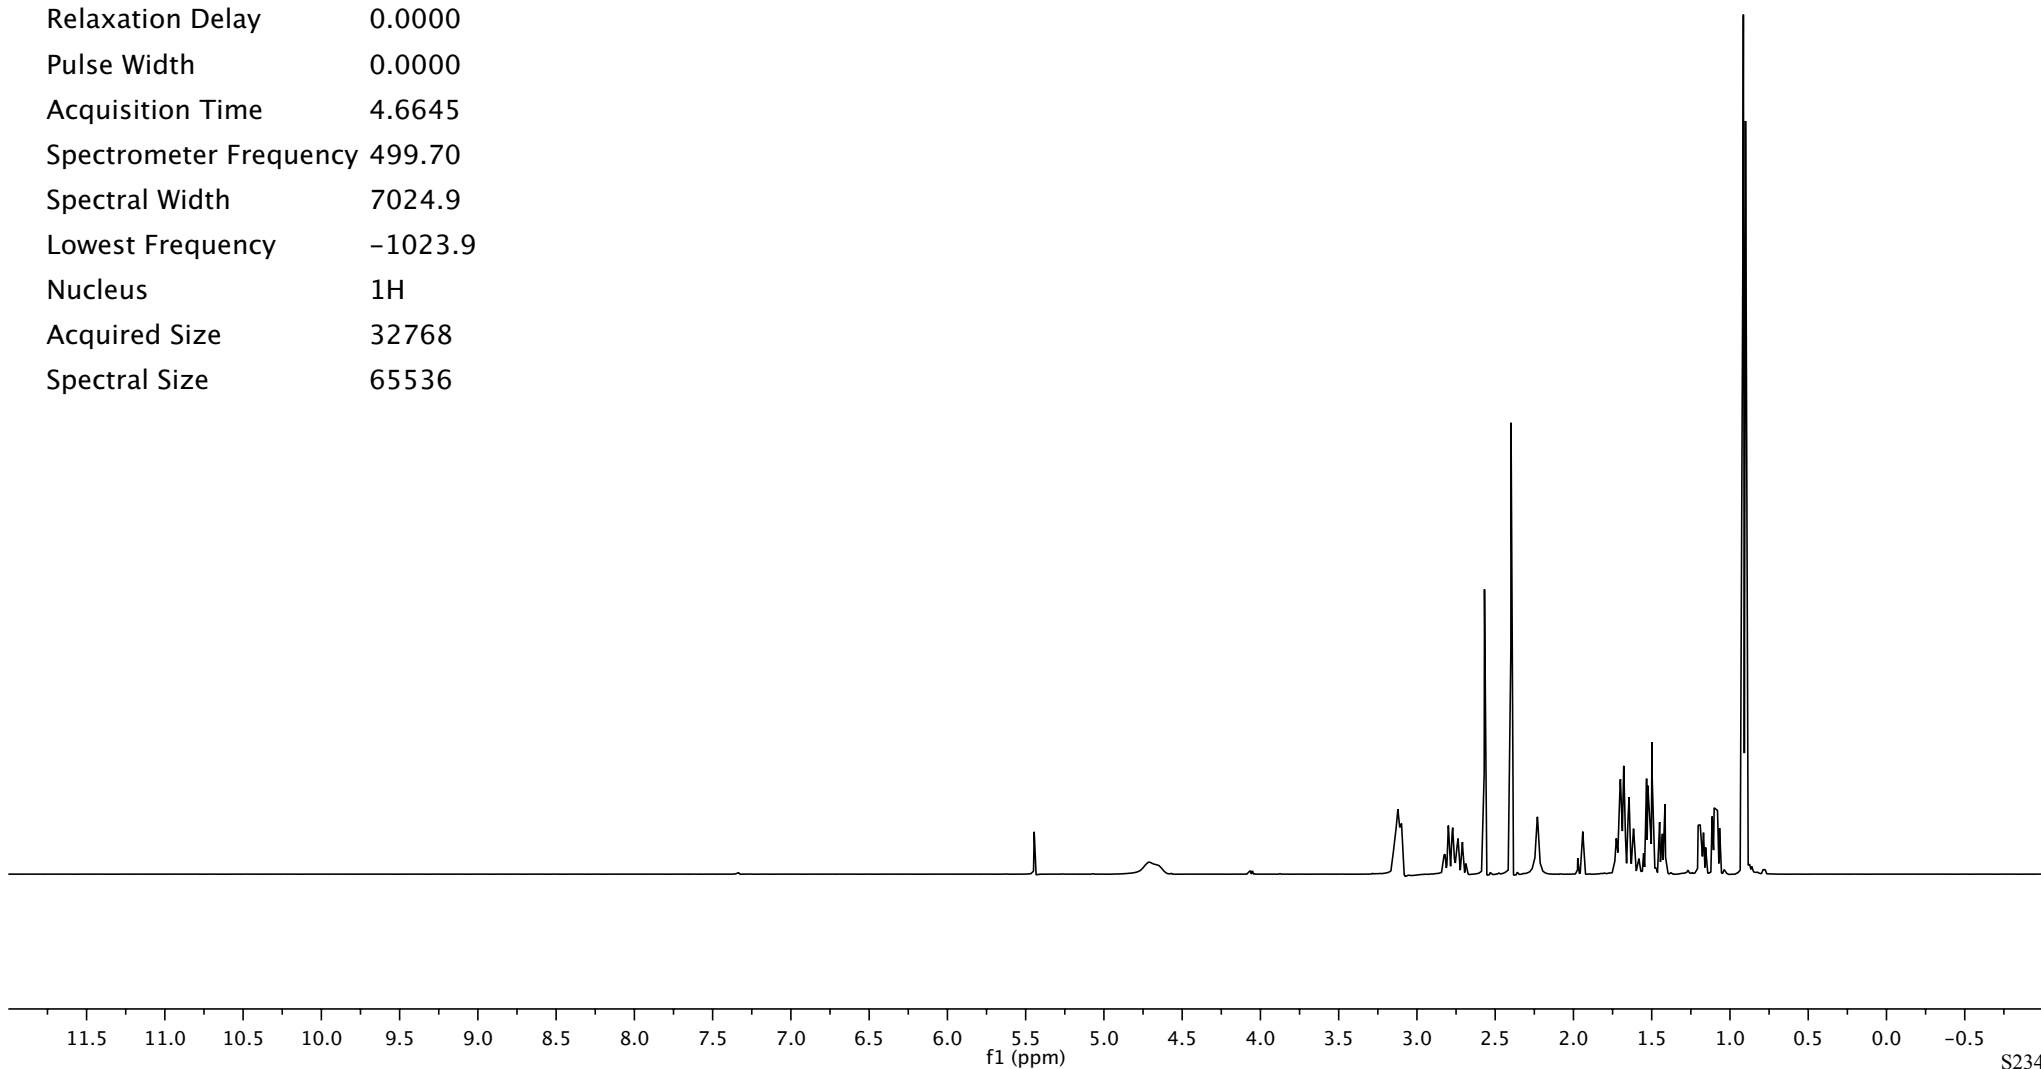

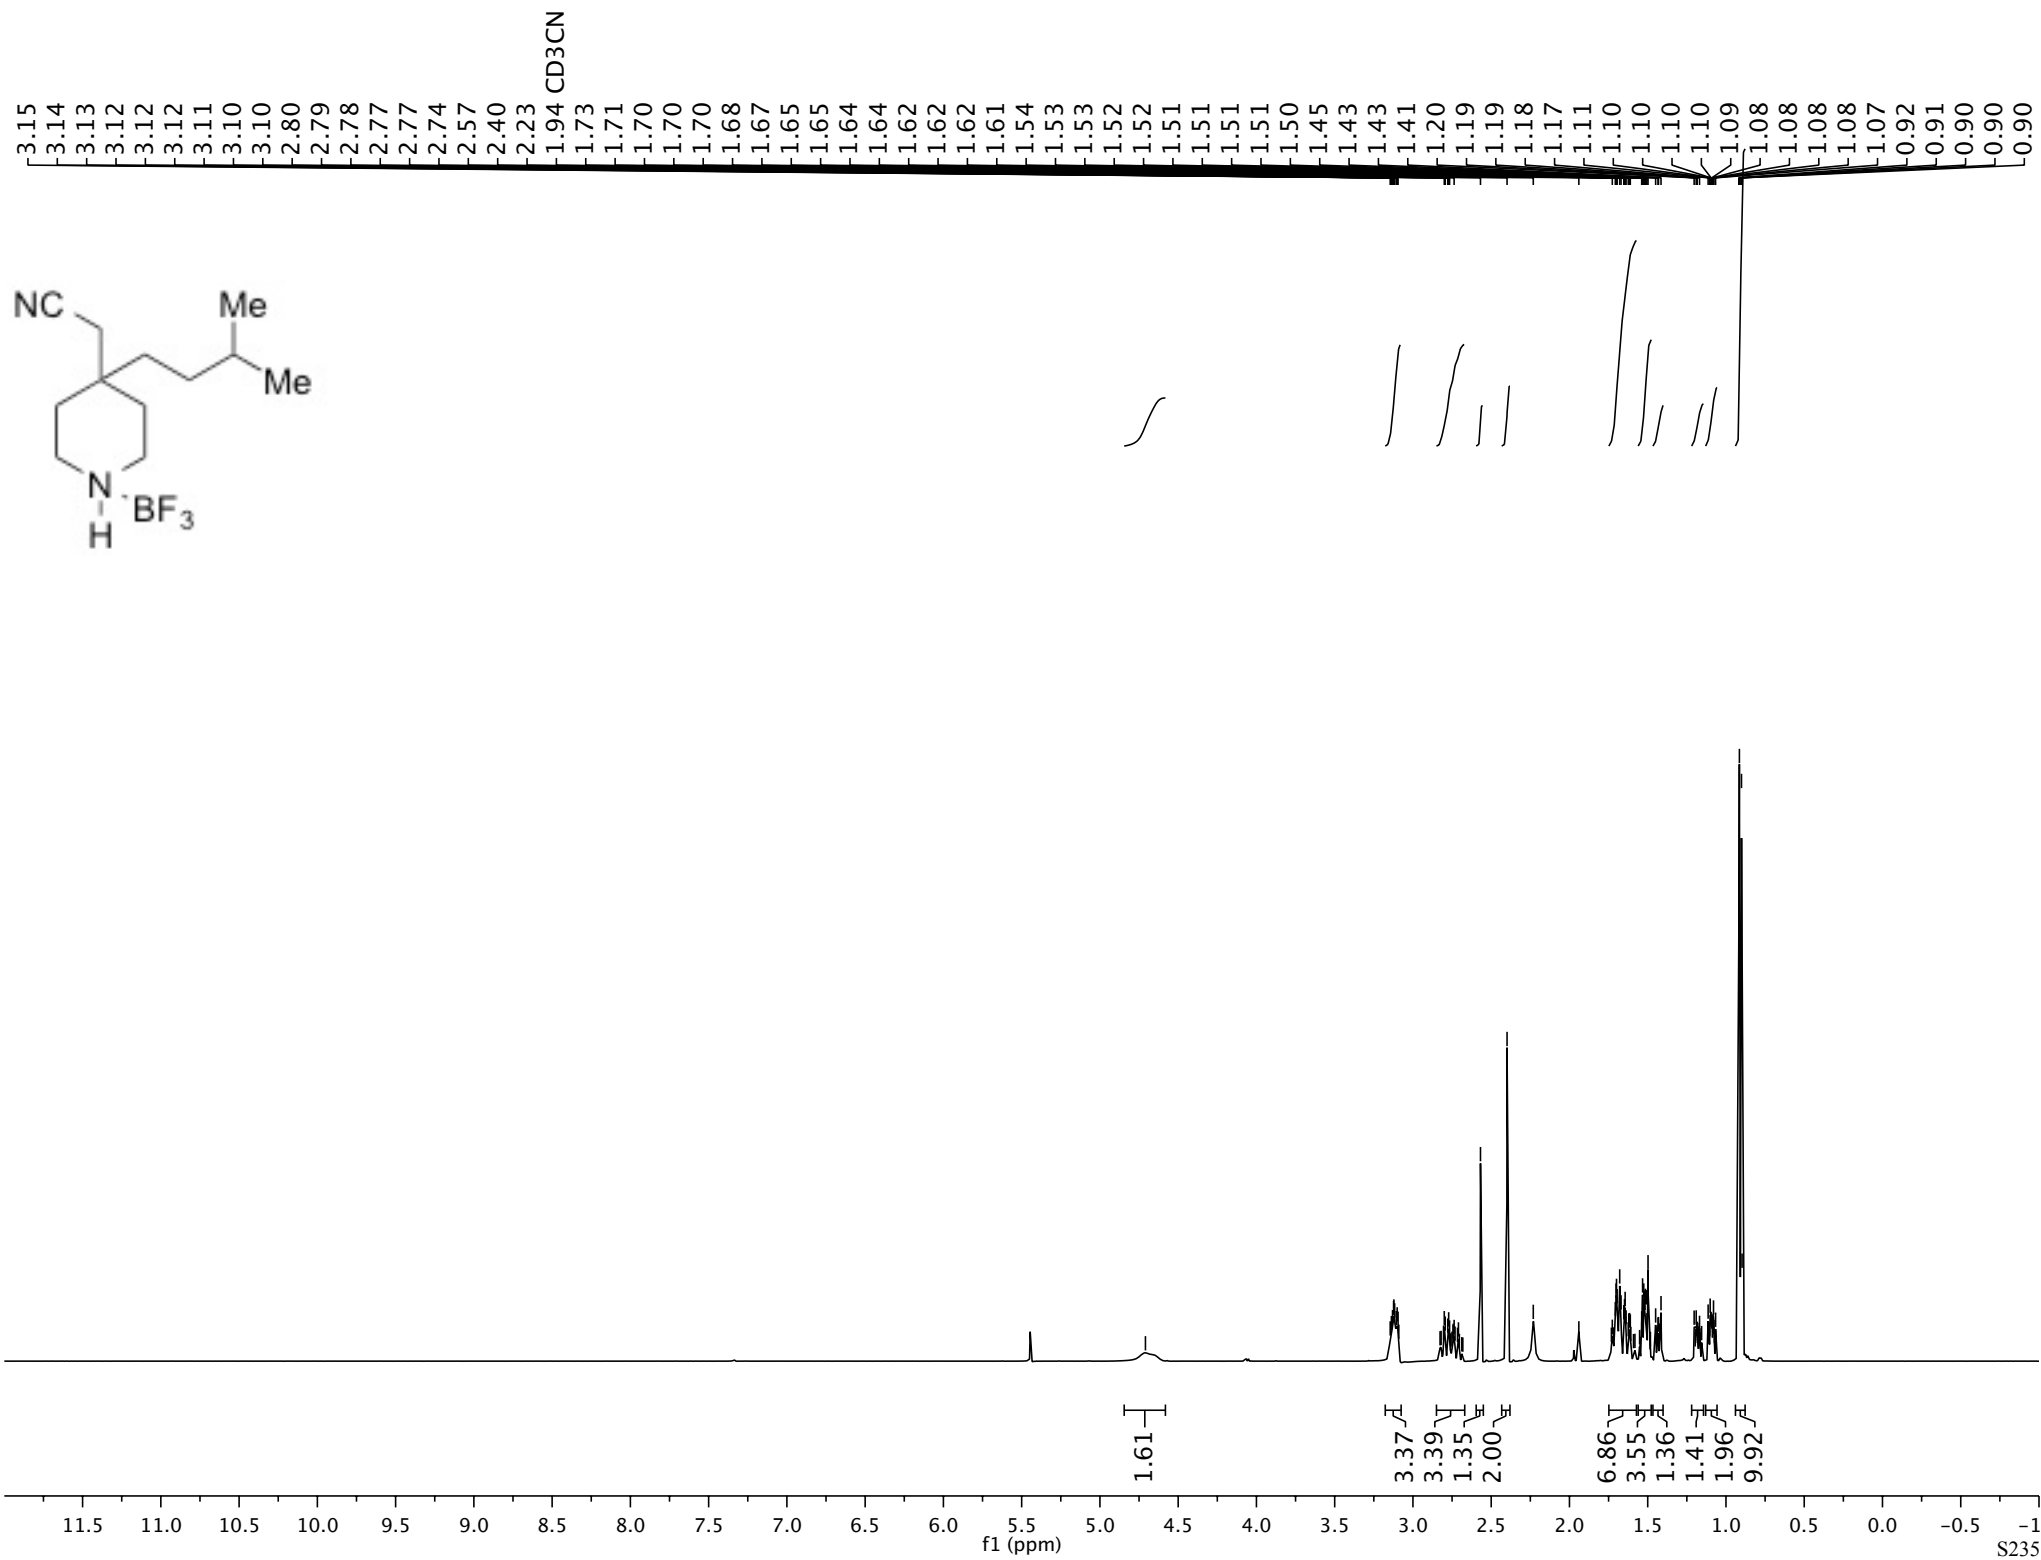

| Parameter              | Value           |
|------------------------|-----------------|
| Origin                 | Varian          |
| Spectrometer           | inova           |
| Solvent                | CD3CN           |
| Temperature            | 25.0            |
| Pulse Sequence         | s2pul           |
| Experiment             | 1D              |
| Probe                  | QUAD            |
| Number of Scans        | 224             |
| Receiver Gain          | 60              |
| Relaxation Delay       | 1.0000          |
| Pulse Width            | 0.0000          |
| Acquisition Time       | 1.0863          |
| Spectrometer Frequency | 125.66          |
| Spectral Width         | 30165.9         |
| Lowest Frequency       | -1168.4         |
| Nucleus                | <sup>13</sup> C |
| Acquired Size          | 32768           |
| Spectral Size          | 65536           |

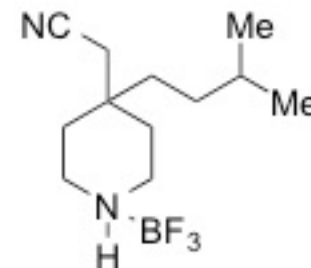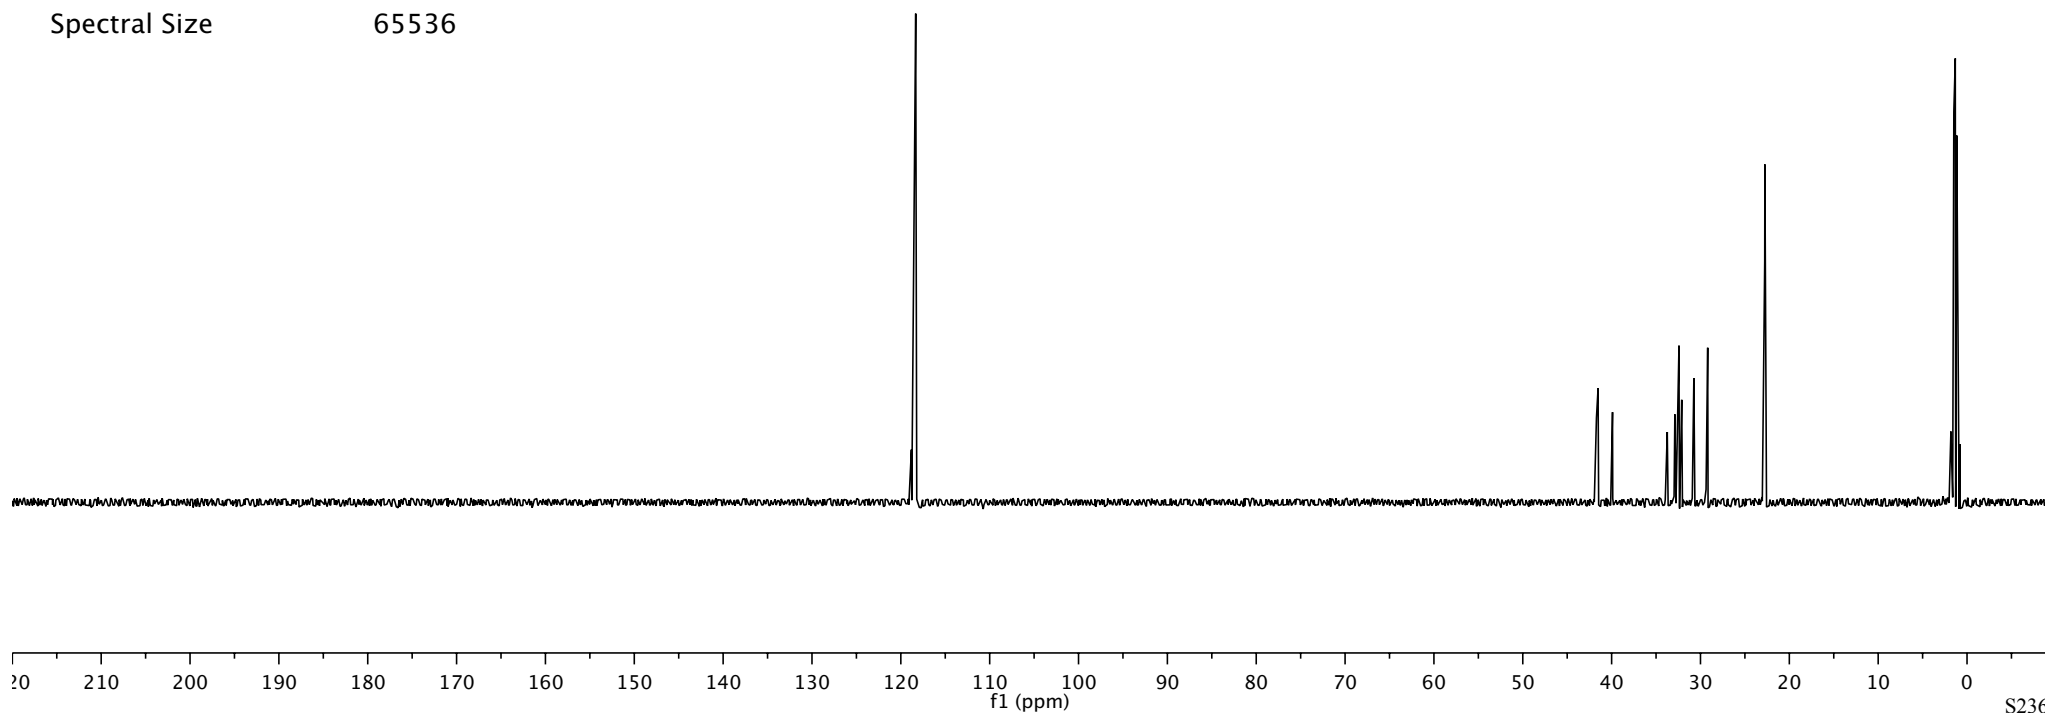

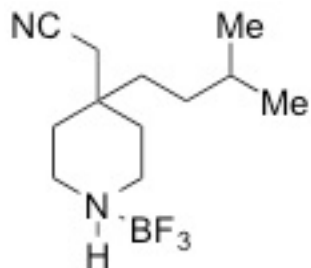

118.87  
118.81  
118.33

41.71  
41.53  
39.90  
33.74  
33.70  
32.88  
32.60  
32.42  
32.11  
30.75  
29.33  
29.23  
29.19  
22.89  
22.77  
22.75

— 1.32 CD3CN

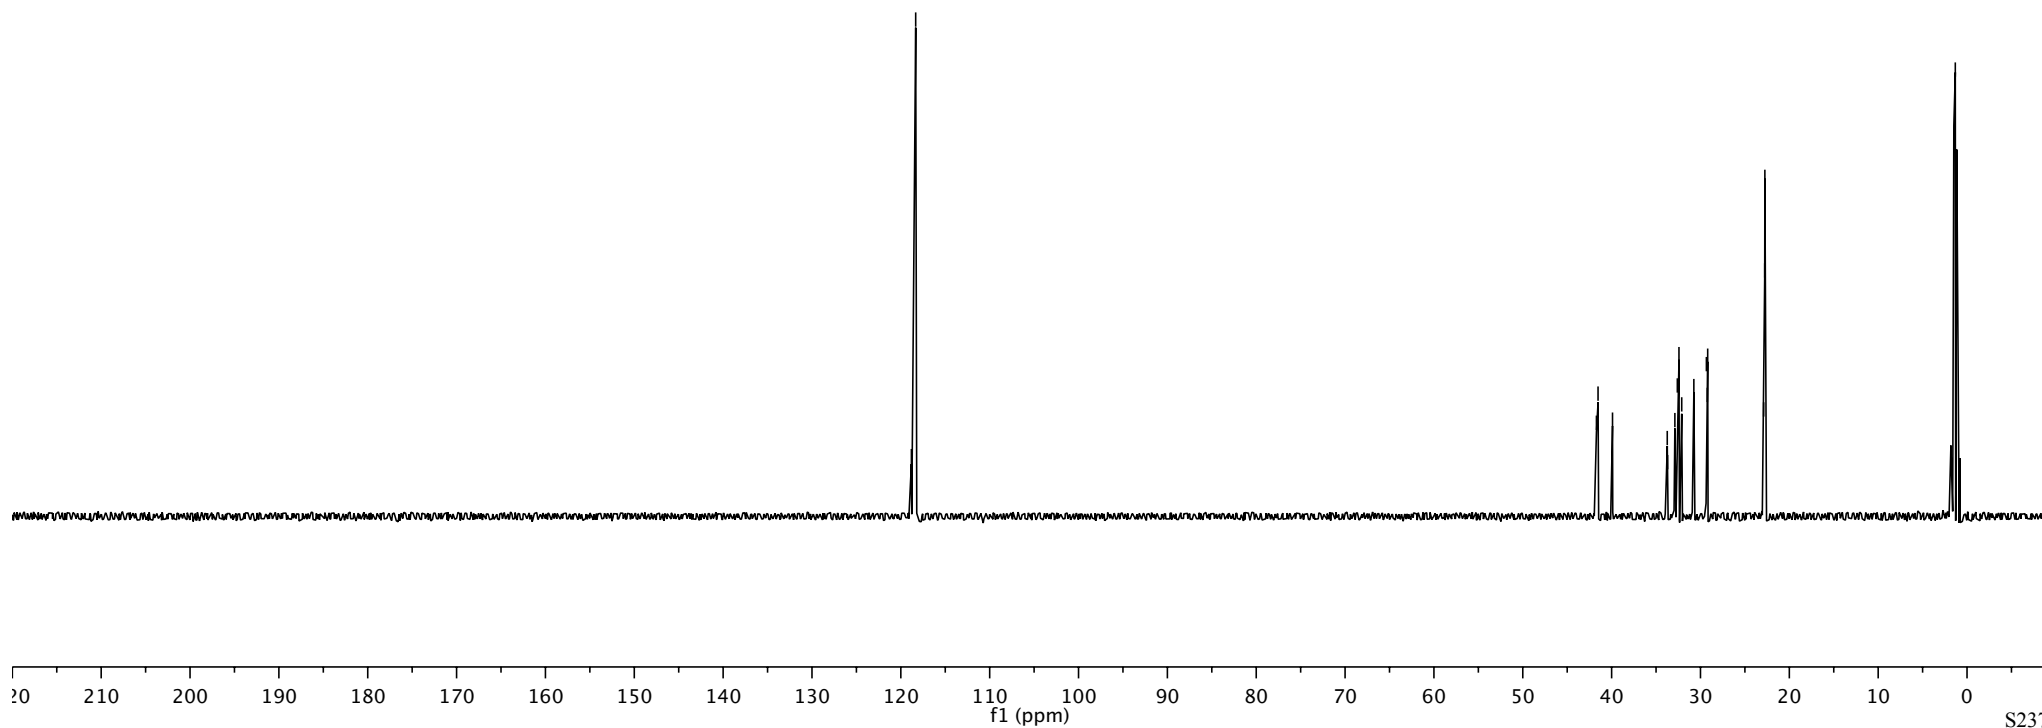

| Parameter              | Value           |
|------------------------|-----------------|
| Origin                 | Varian          |
| Spectrometer           | inova           |
| Solvent                | CDCl3           |
| Temperature            | 25.0            |
| Pulse Sequence         | s2pul           |
| Experiment             | 1D              |
| Probe                  | QUAD            |
| Number of Scans        | 64              |
| Receiver Gain          | 60              |
| Relaxation Delay       | 0.0000          |
| Pulse Width            | 0.0000          |
| Acquisition Time       | 0.3277          |
| Spectrometer Frequency | 470.15          |
| Spectral Width         | 100000.0        |
| Lowest Frequency       | -79501.3        |
| Nucleus                | <sup>19</sup> F |
| Acquired Size          | 32768           |
| Spectral Size          | 65536           |

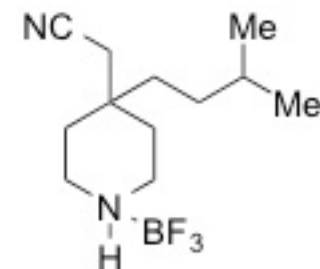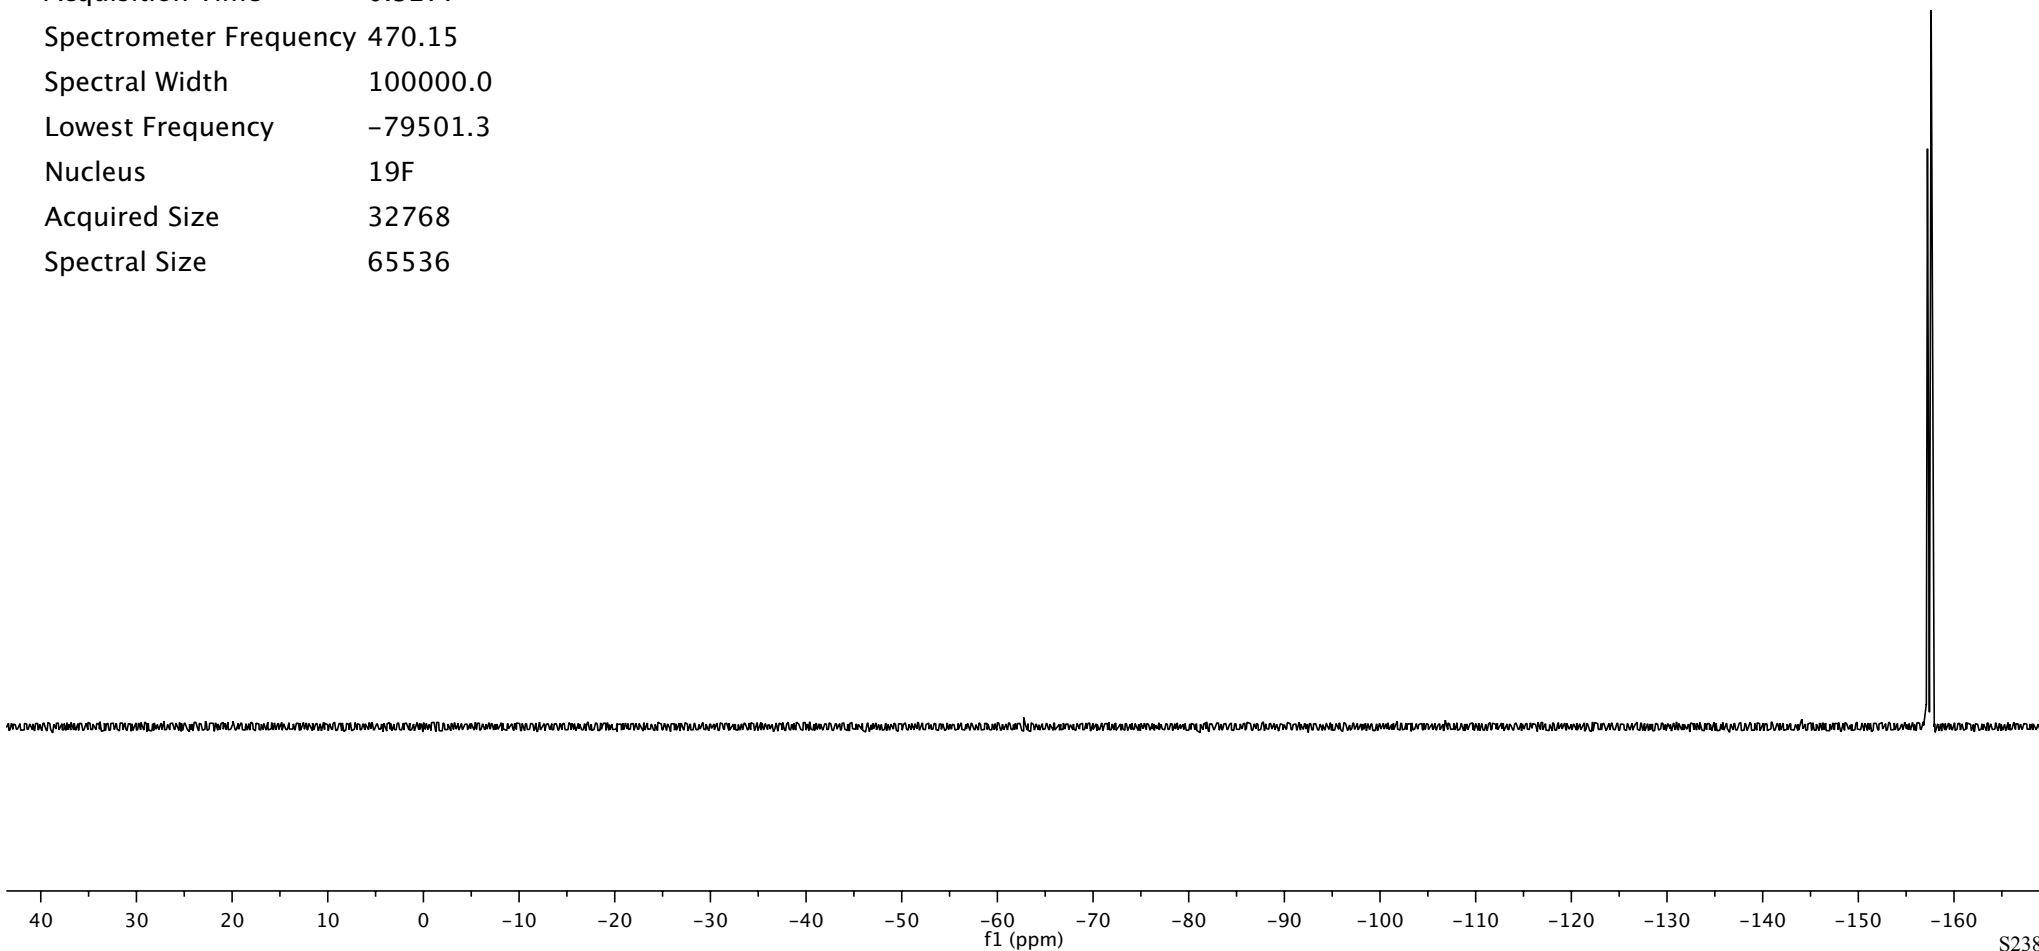

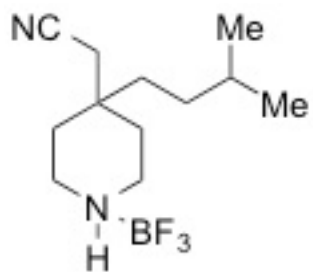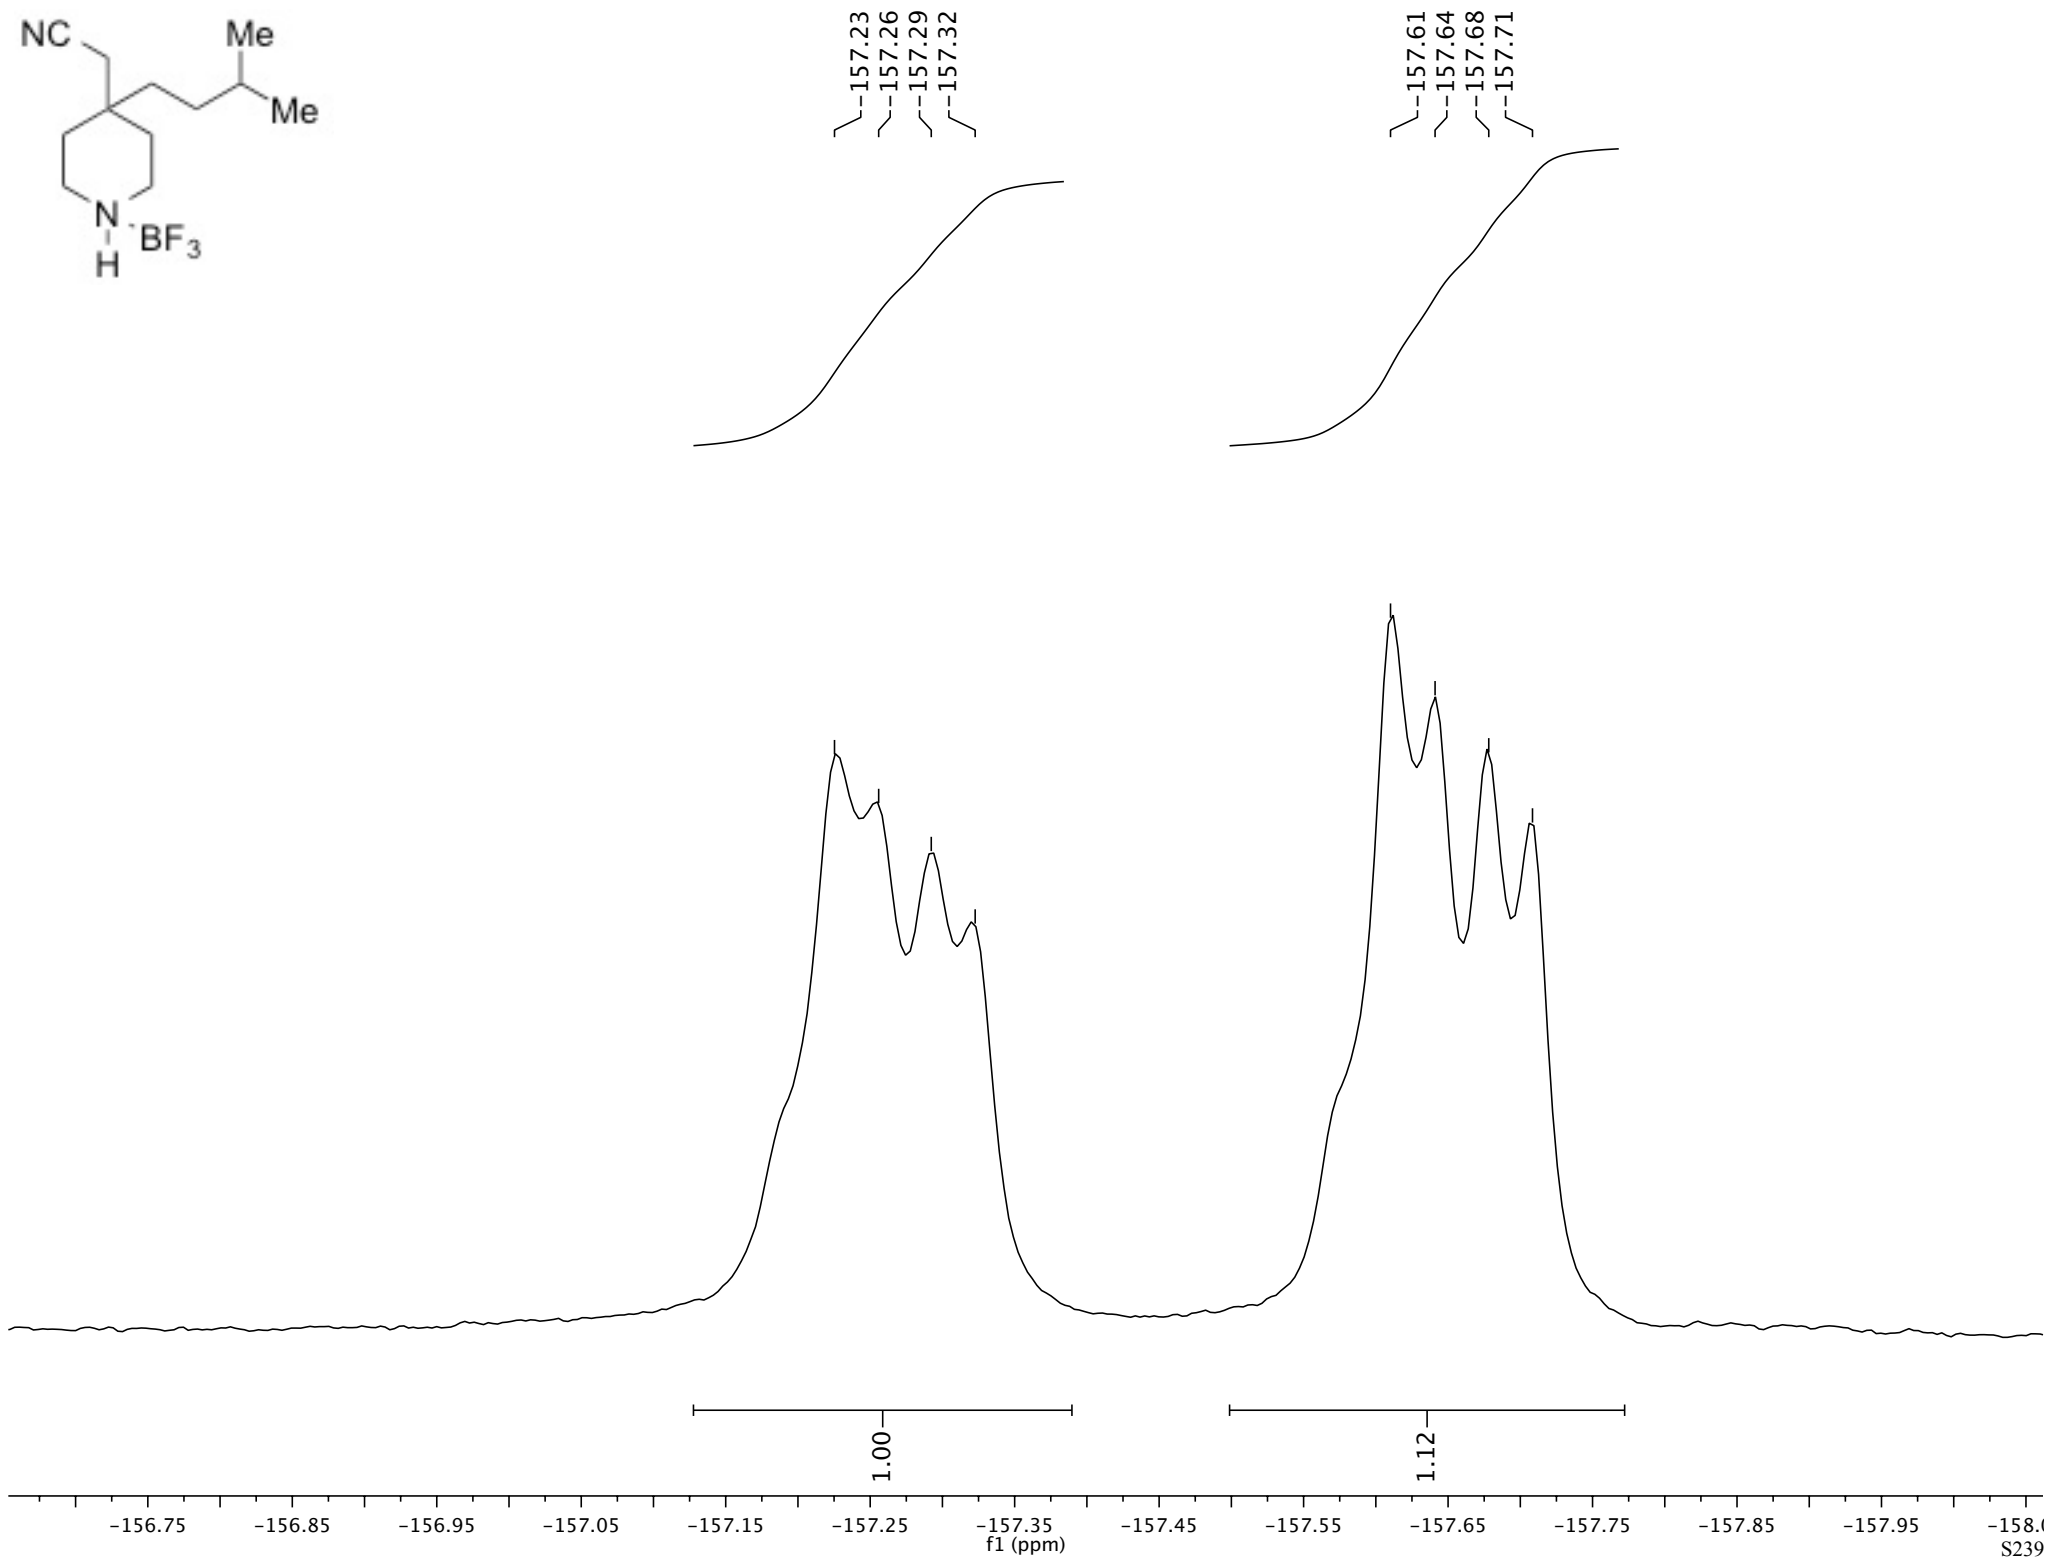



| Parameter              | Value             |
|------------------------|-------------------|
| Origin                 | Varian            |
| Spectrometer           | inova             |
| Solvent                | CDCl <sub>3</sub> |
| Temperature            | 20.0              |
| Pulse Sequence         | s2pul             |
| Experiment             | 1D                |
| Probe                  | hcn               |
| Number of Scans        | 16                |
| Receiver Gain          | 32                |
| Relaxation Delay       | 2.0000            |
| Pulse Width            | 0.0000            |
| Acquisition Time       | 4.0960            |
| Spectrometer Frequency | 500.07            |
| Spectral Width         | 8000.0            |
| Lowest Frequency       | -1521.1           |
| Nucleus                | <sup>1</sup> H    |
| Acquired Size          | 32768             |
| Spectral Size          | 65536             |

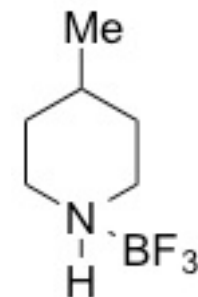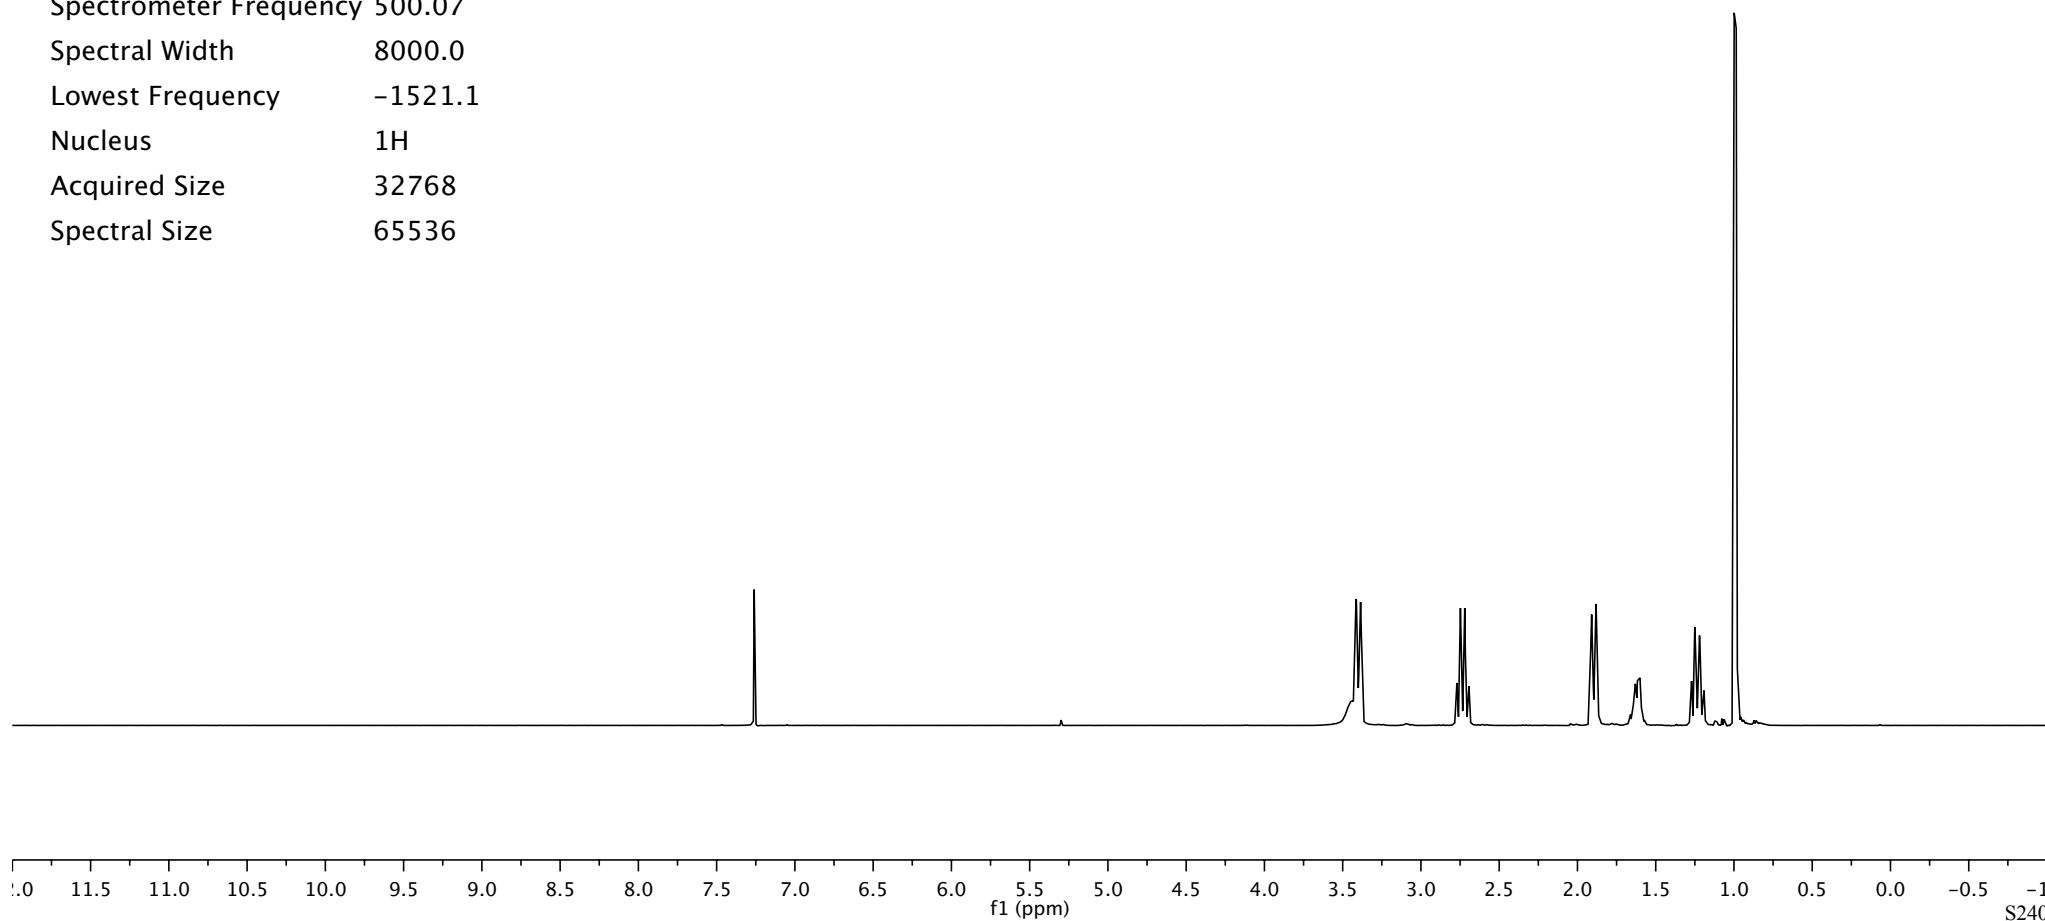

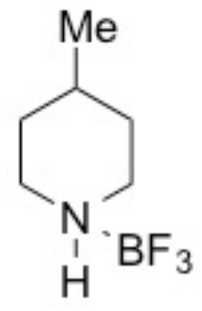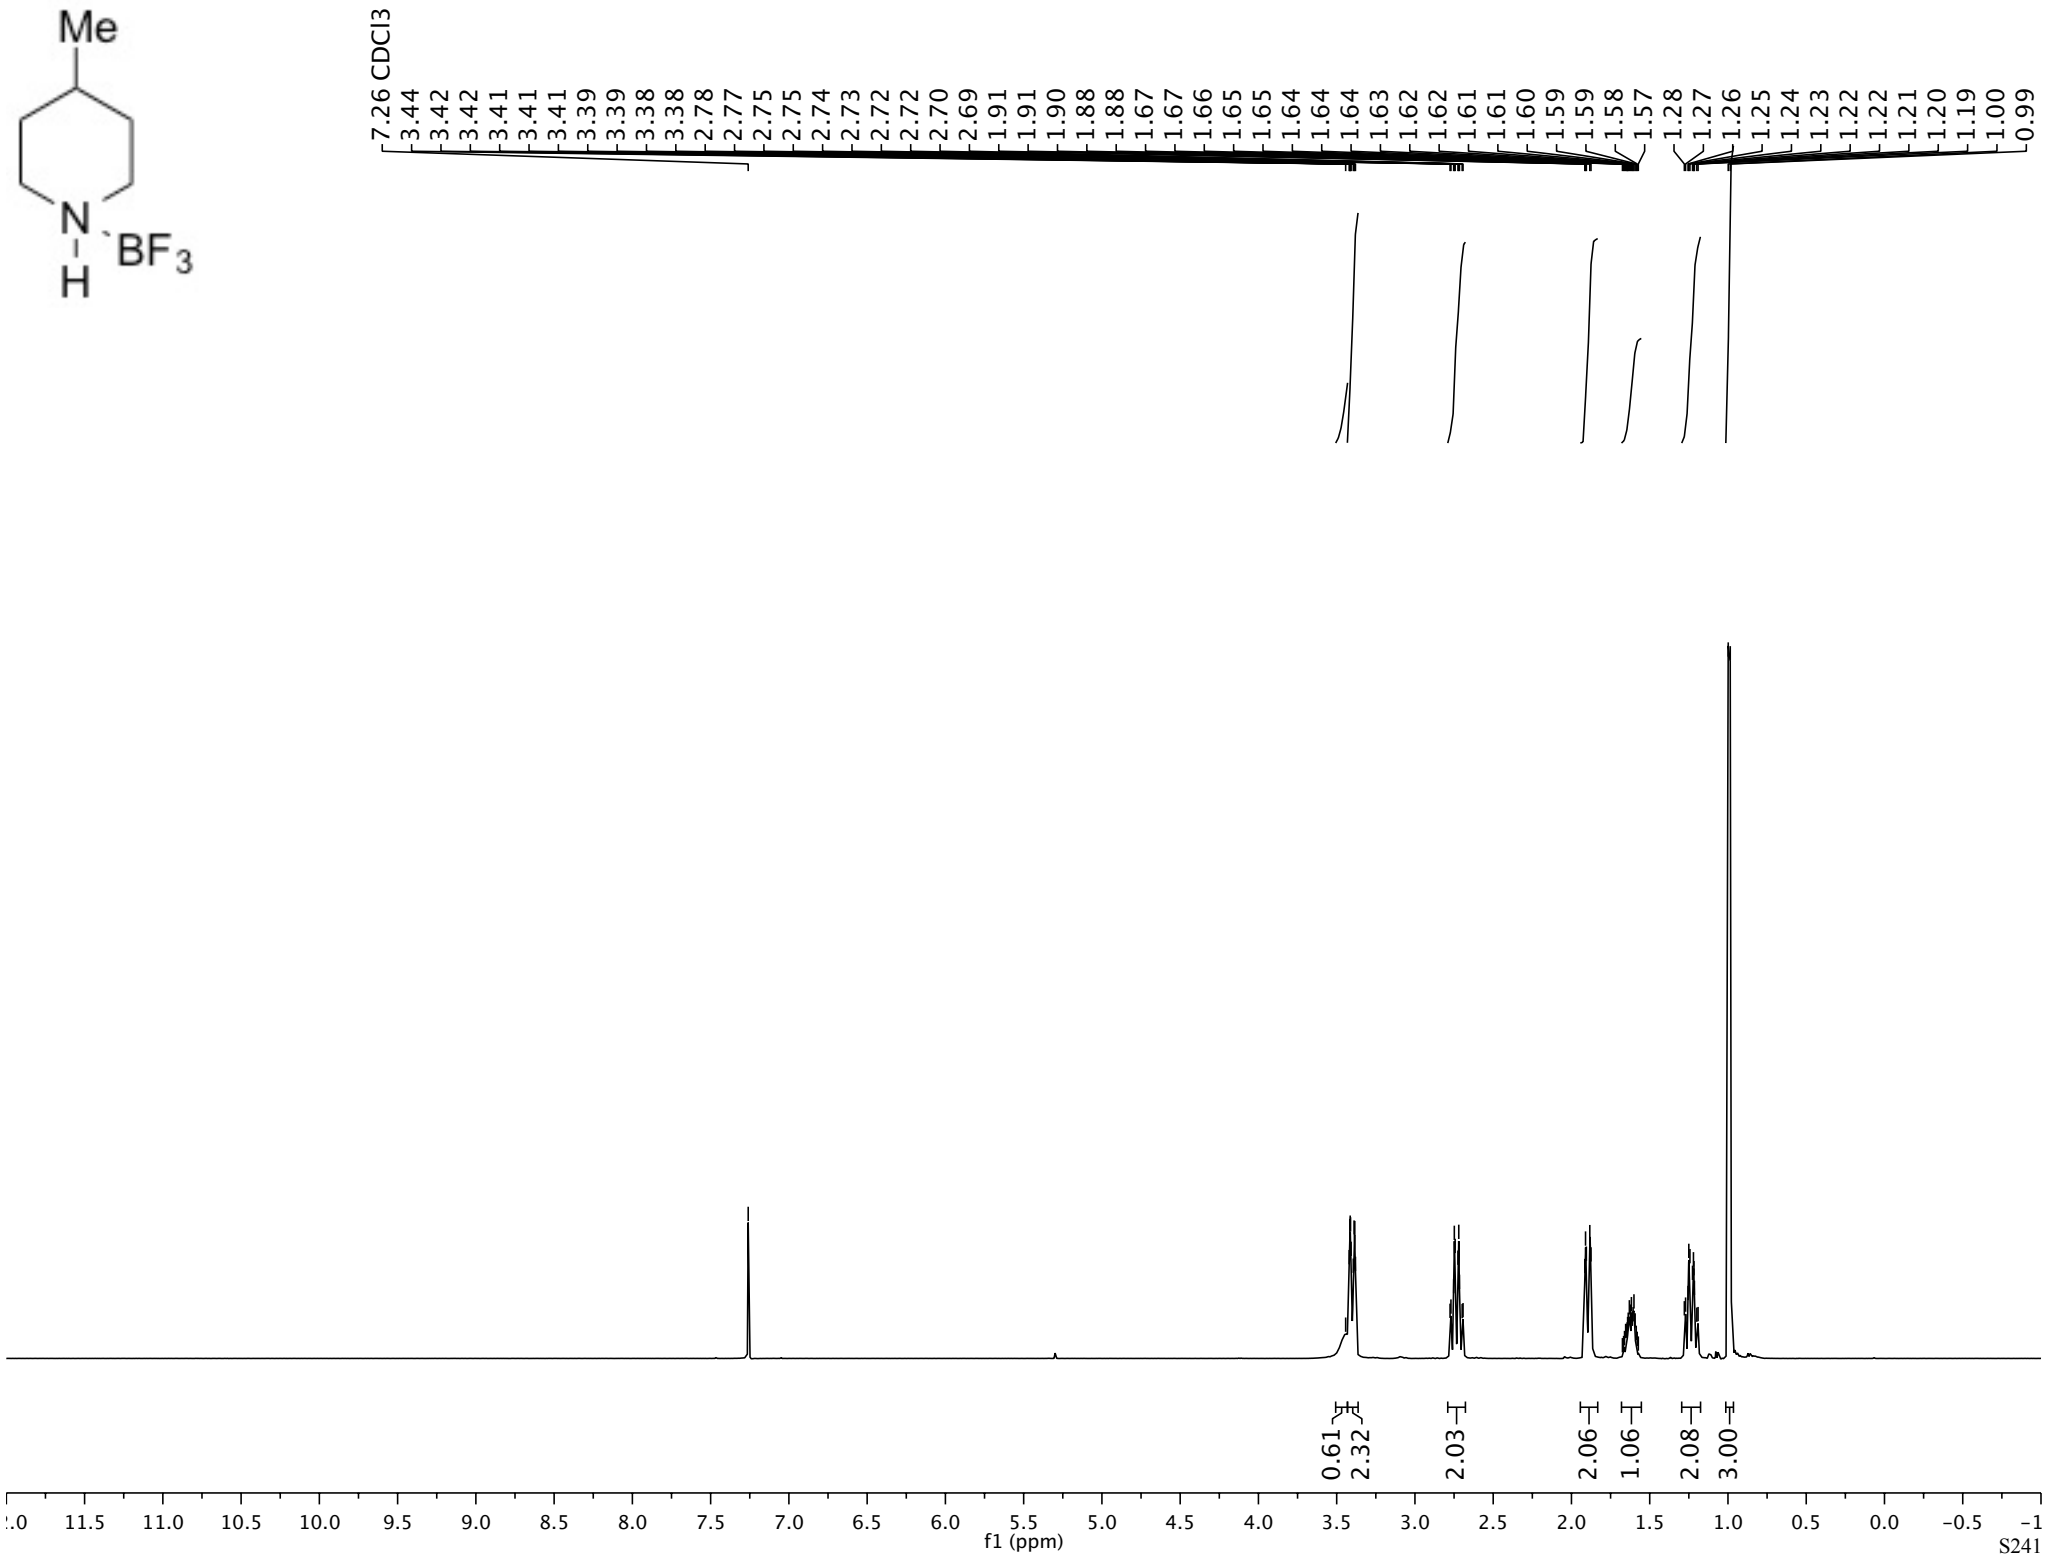

| Parameter              | Value             |
|------------------------|-------------------|
| Origin                 | Varian            |
| Spectrometer           | inova             |
| Solvent                | CDCl <sub>3</sub> |
| Temperature            | 20.0              |
| Pulse Sequence         | s2pul             |
| Experiment             | 1D                |
| Probe                  | QUAD              |
| Number of Scans        | 64                |
| Receiver Gain          | 60                |
| Relaxation Delay       | 1.0000            |
| Pulse Width            | 0.0000            |
| Acquisition Time       | 1.0863            |
| Spectrometer Frequency | 125.66            |
| Spectral Width         | 30165.9           |
| Lowest Frequency       | -1276.5           |
| Nucleus                | <sup>13</sup> C   |
| Acquired Size          | 32768             |
| Spectral Size          | 65536             |

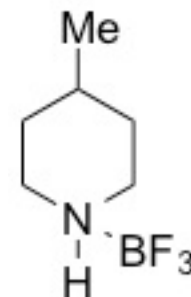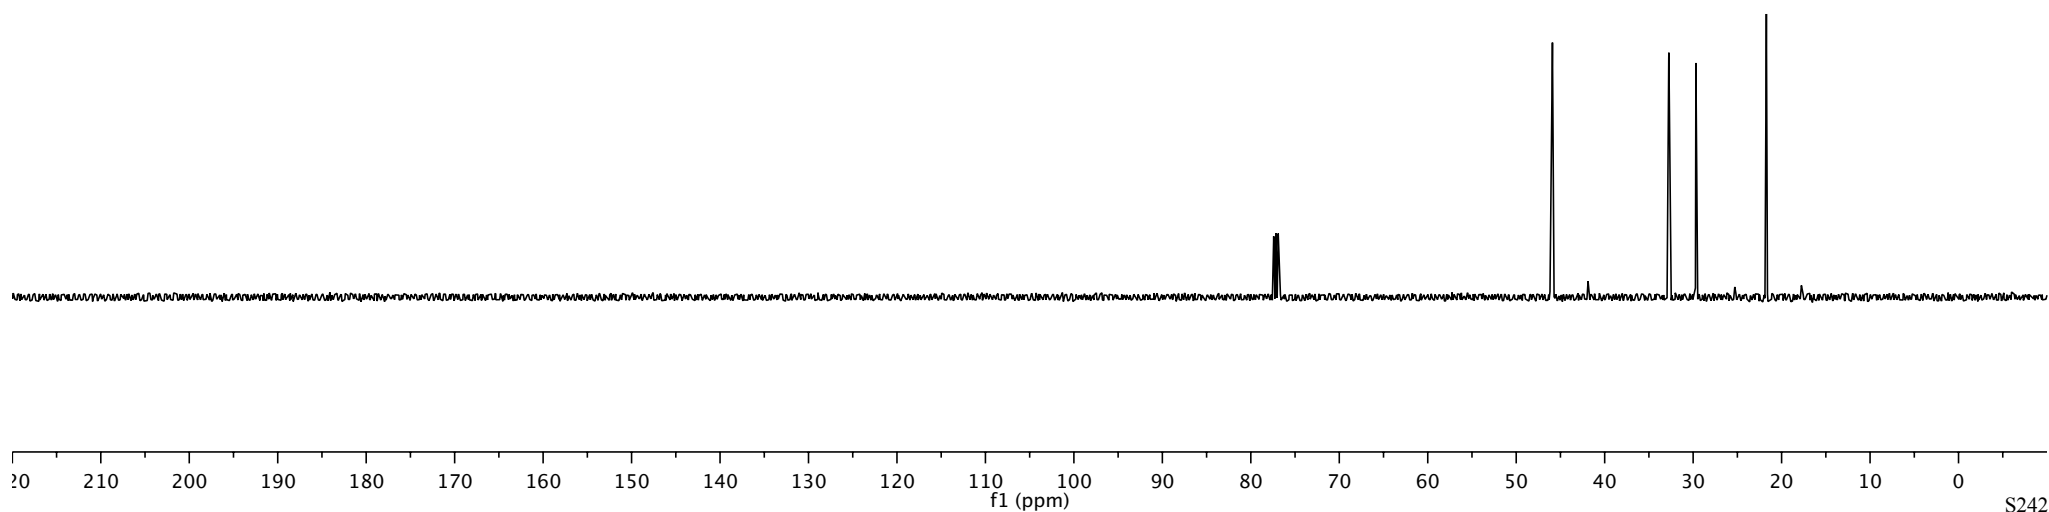

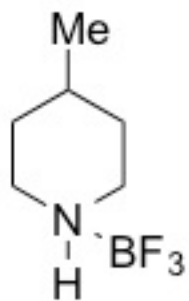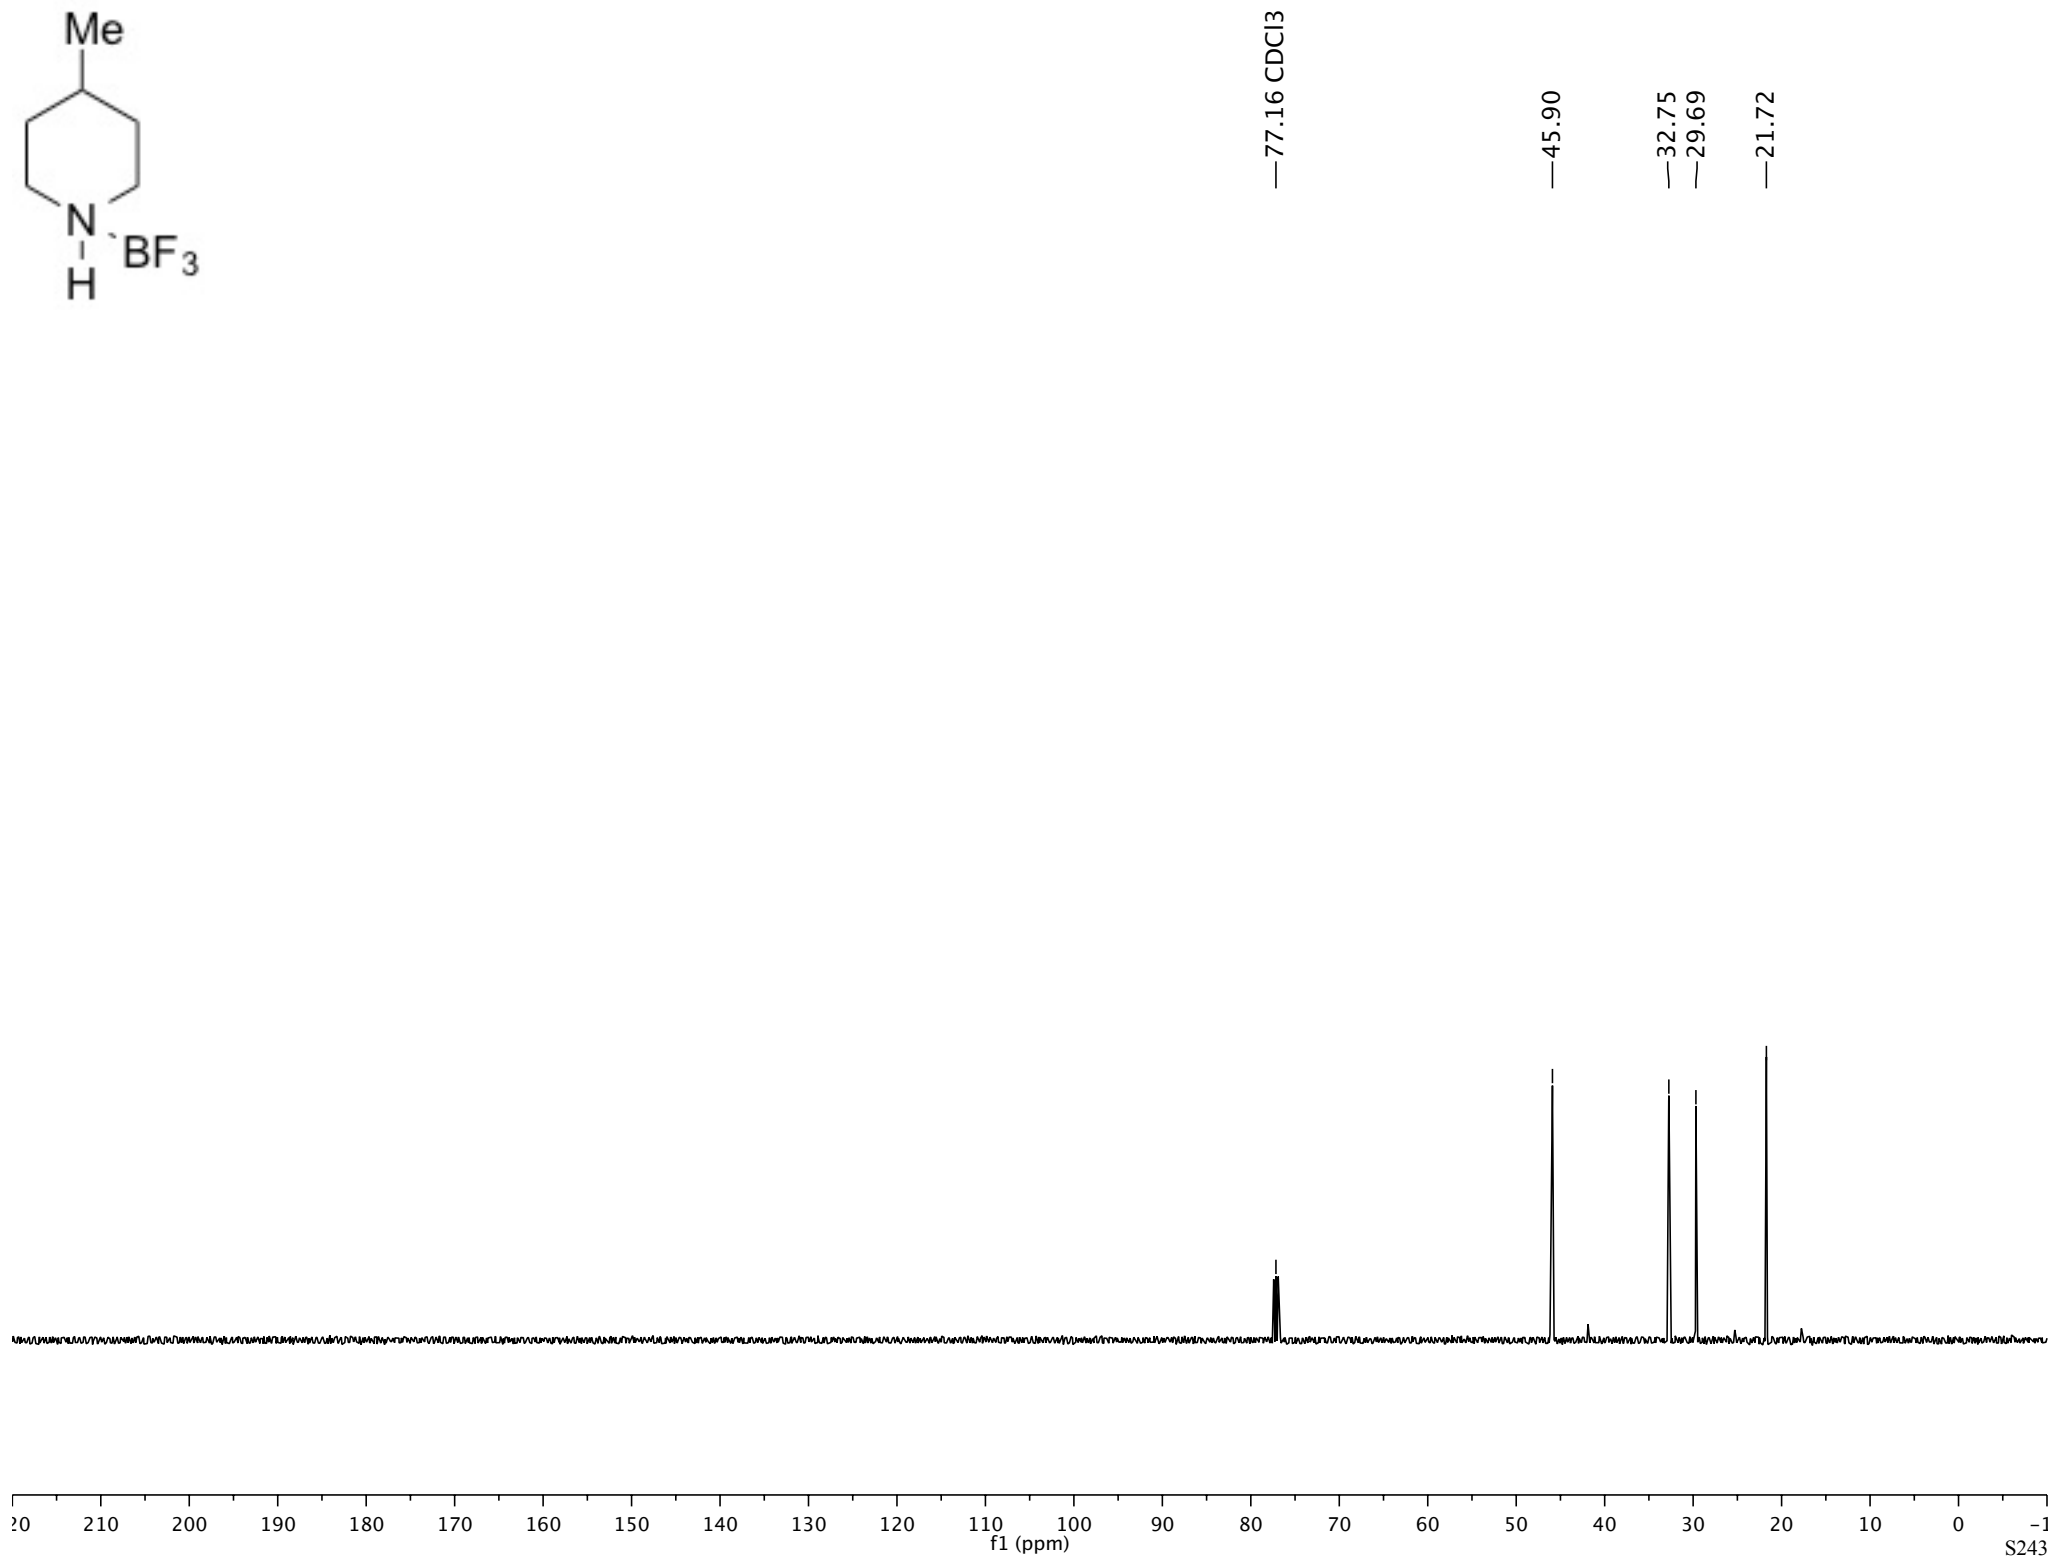

| Parameter              | Value    |
|------------------------|----------|
| Origin                 | Varian   |
| Spectrometer           | inova    |
| Solvent                | CDCl3    |
| Temperature            | 20.0     |
| Pulse Sequence         | s2pul    |
| Experiment             | 1D       |
| Probe                  | QUAD     |
| Number of Scans        | 64       |
| Receiver Gain          | 52       |
| Relaxation Delay       | 0.0000   |
| Pulse Width            | 0.0000   |
| Acquisition Time       | 0.3277   |
| Spectrometer Frequency | 470.15   |
| Spectral Width         | 100000.0 |
| Lowest Frequency       | -79501.3 |
| Nucleus                | 19F      |
| Acquired Size          | 32768    |
| Spectral Size          | 65536    |

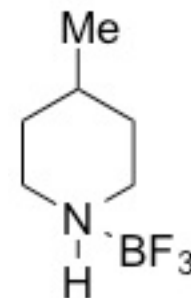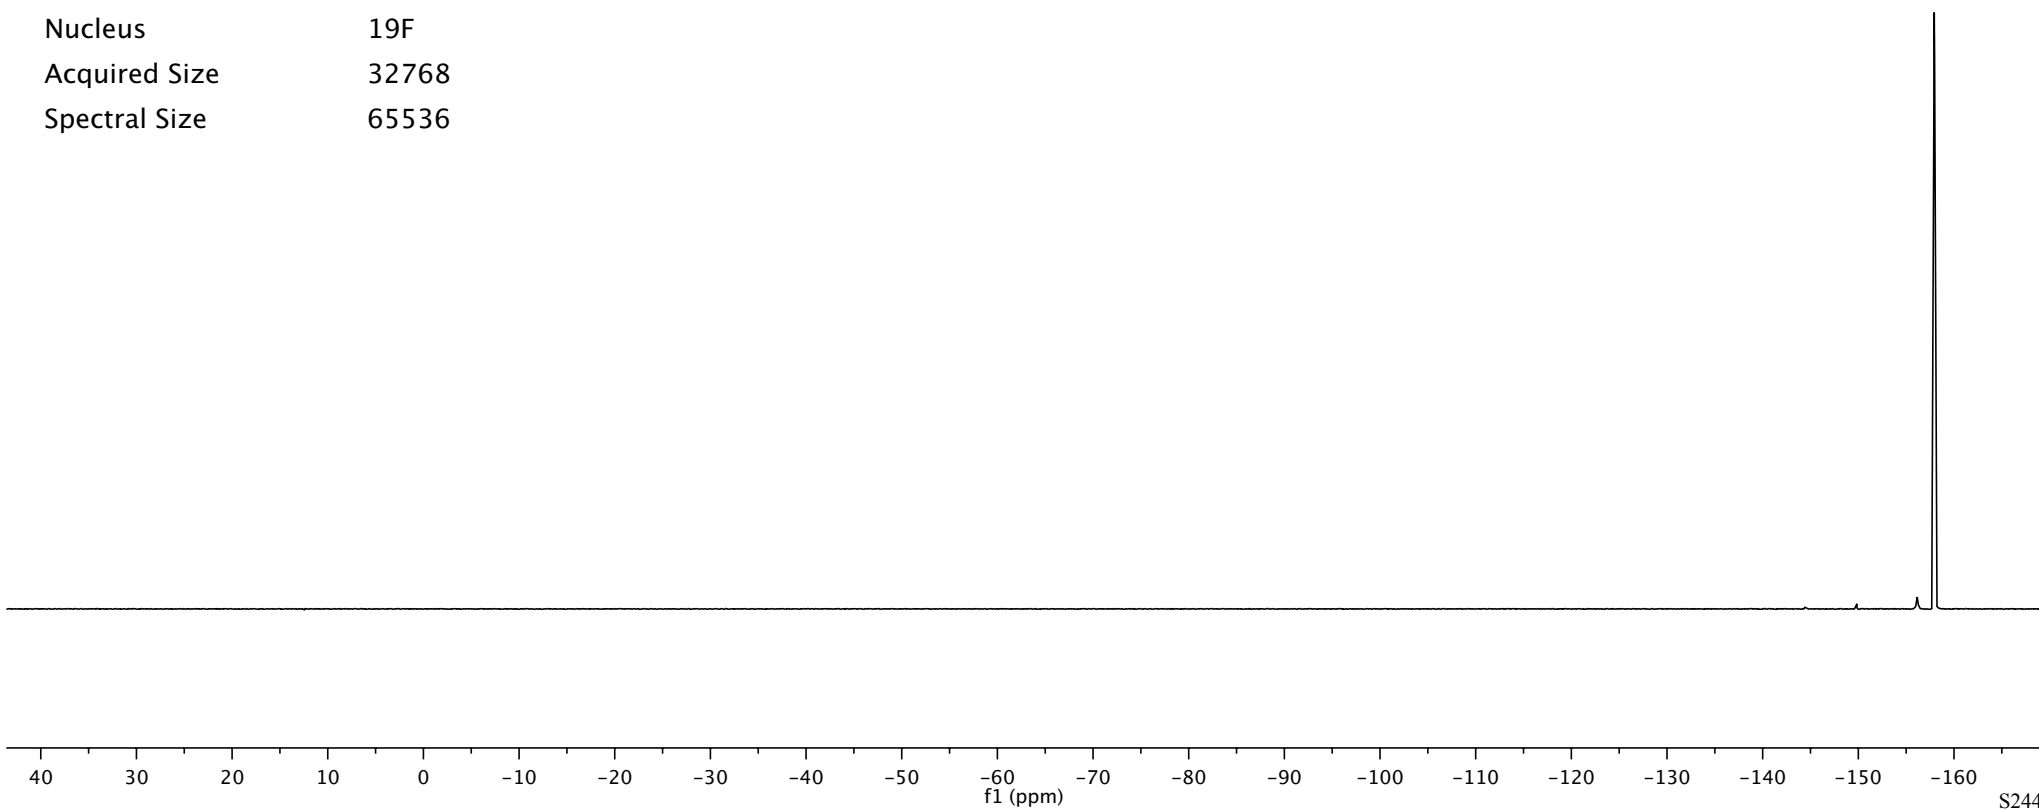

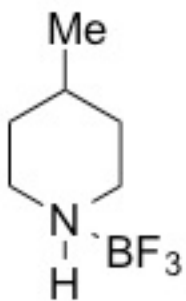

157.94  
157.97  
158.01  
158.04

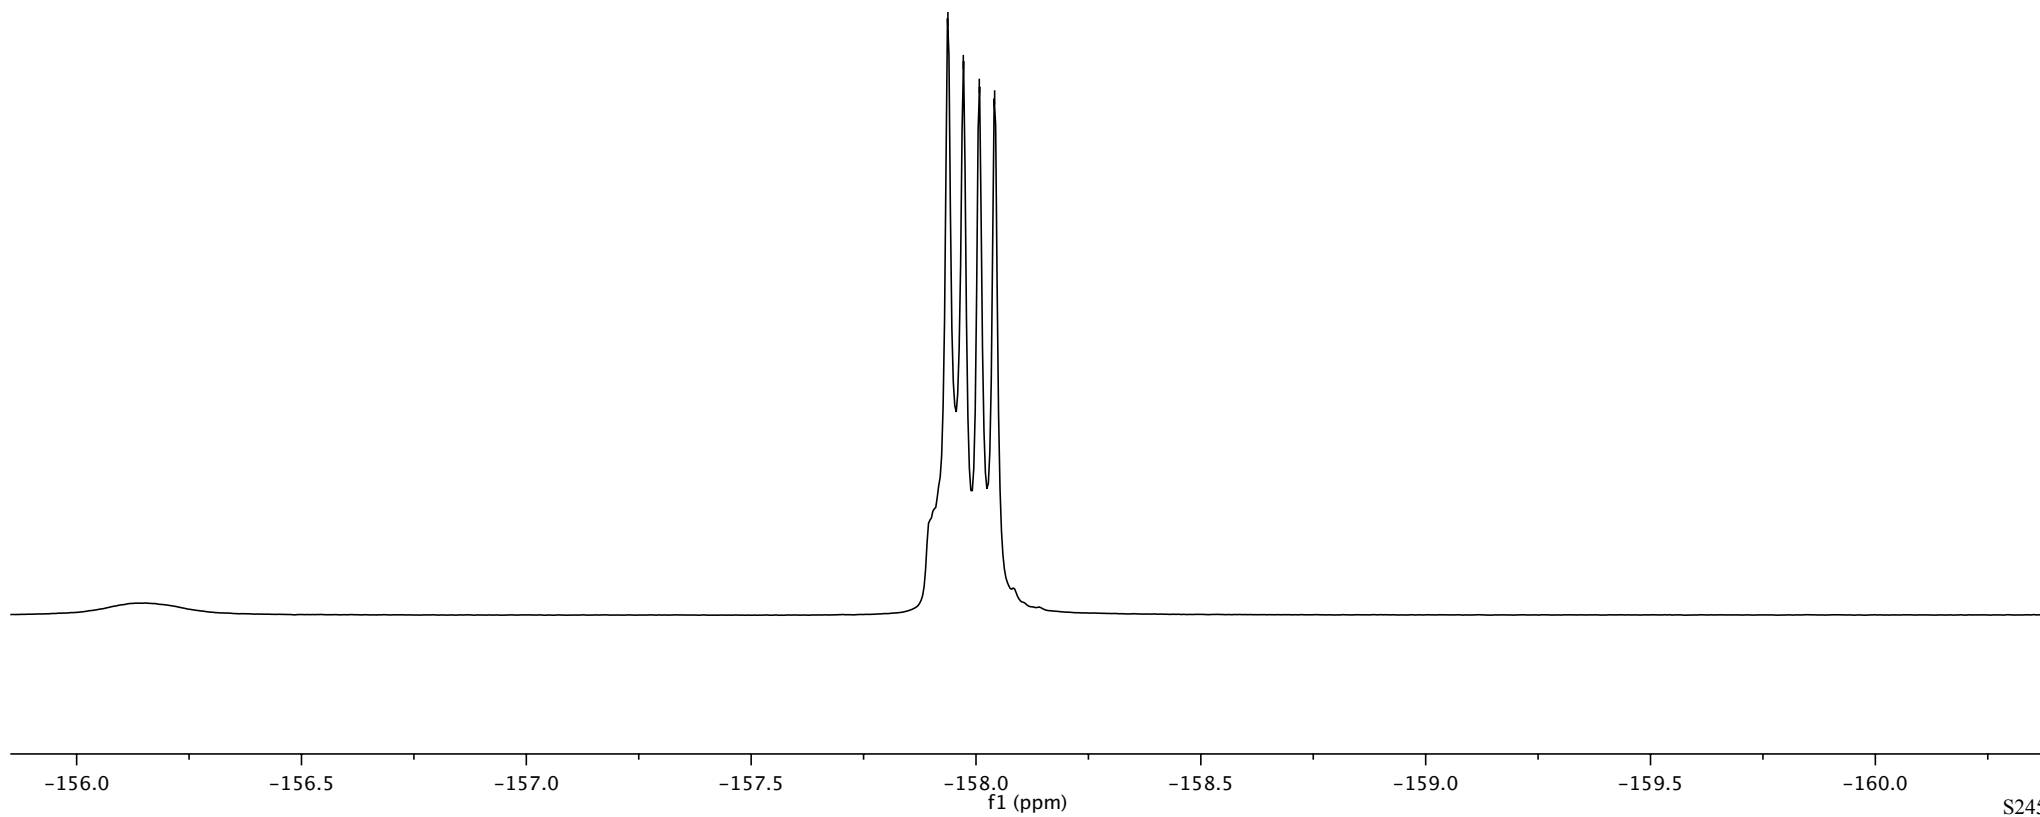

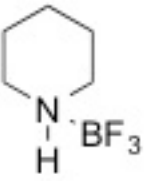

| Parameter              | Value   |
|------------------------|---------|
| Origin                 | Varian  |
| Spectrometer           | inova   |
| Solvent                | CDCl3   |
| Temperature            | 20.0    |
| Pulse Sequence         | s2pul   |
| Experiment             | 1D      |
| Probe                  | QUADG   |
| Receiver Gain          | 44      |
| Relaxation Delay       | 0.0000  |
| Pulse Width            | 0.0000  |
| Acquisition Time       | 4.0960  |
| Spectrometer Frequency | 499.43  |
| Spectral Width         | 8000.0  |
| Lowest Frequency       | -1518.4 |
| Nucleus                | 1H      |
| Acquired Size          | 32768   |
| Spectral Size          | 65536   |

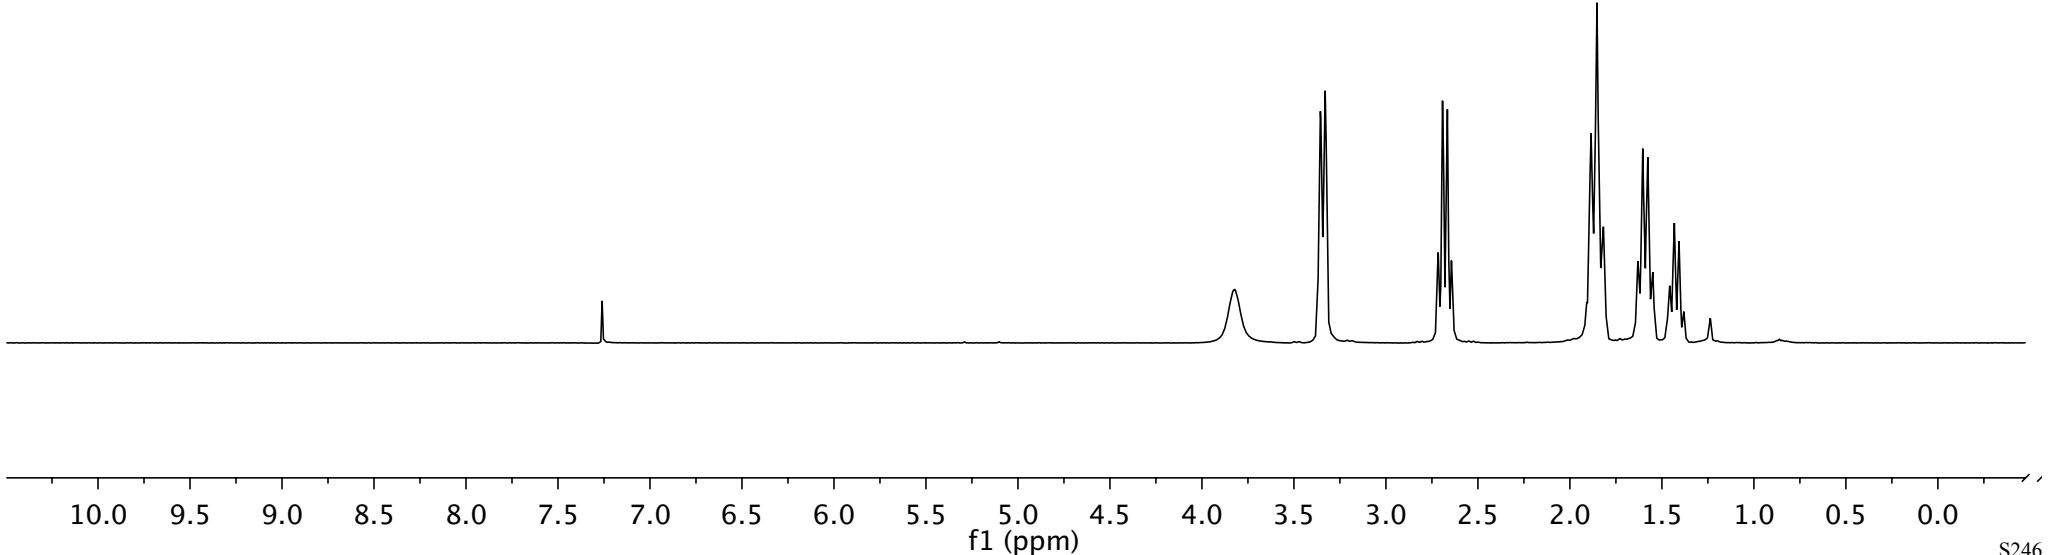

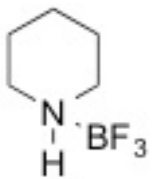

—7.26 CDCl<sub>3</sub>

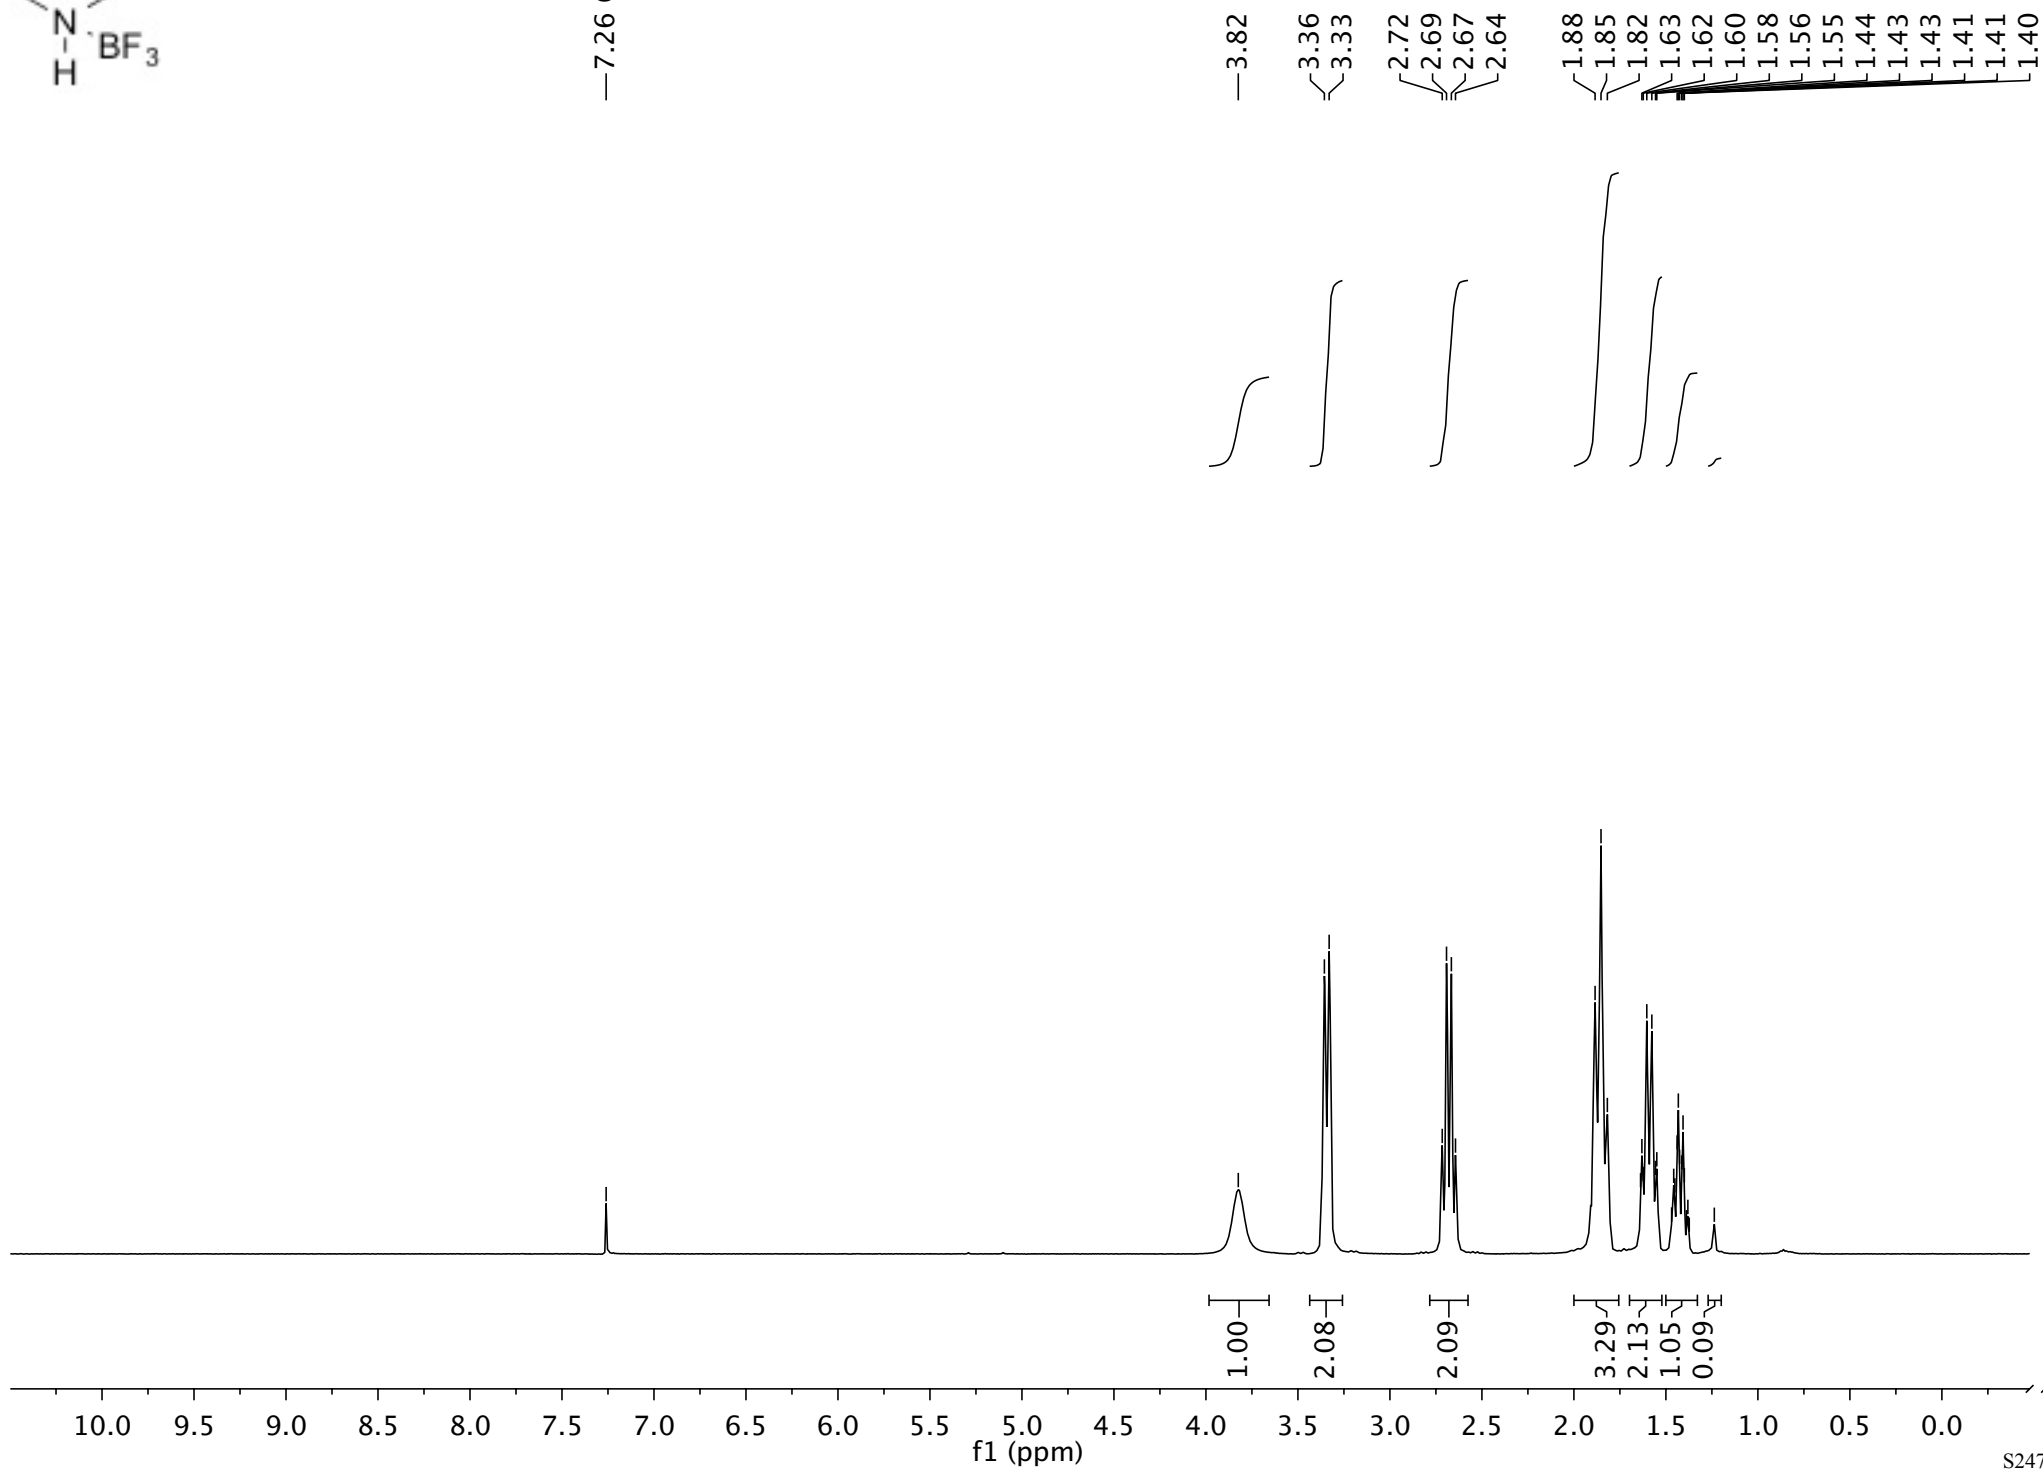



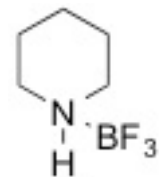

| Parameter              | Value           |
|------------------------|-----------------|
| Origin                 | Varian          |
| Spectrometer           | inova           |
| Solvent                | CDCl3           |
| Temperature            | 20.0            |
| Pulse Sequence         | s2pul           |
| Experiment             | 1D              |
| Probe                  | QUAD            |
| Receiver Gain          | 60              |
| Relaxation Delay       | 1.0000          |
| Pulse Width            | 0.0000          |
| Acquisition Time       | 1.0863          |
| Spectrometer Frequency | 125.66          |
| Spectral Width         | 30165.9         |
| Lowest Frequency       | -1274.6         |
| Nucleus                | <sup>13</sup> C |
| Acquired Size          | 32768           |
| Spectral Size          | 65536           |

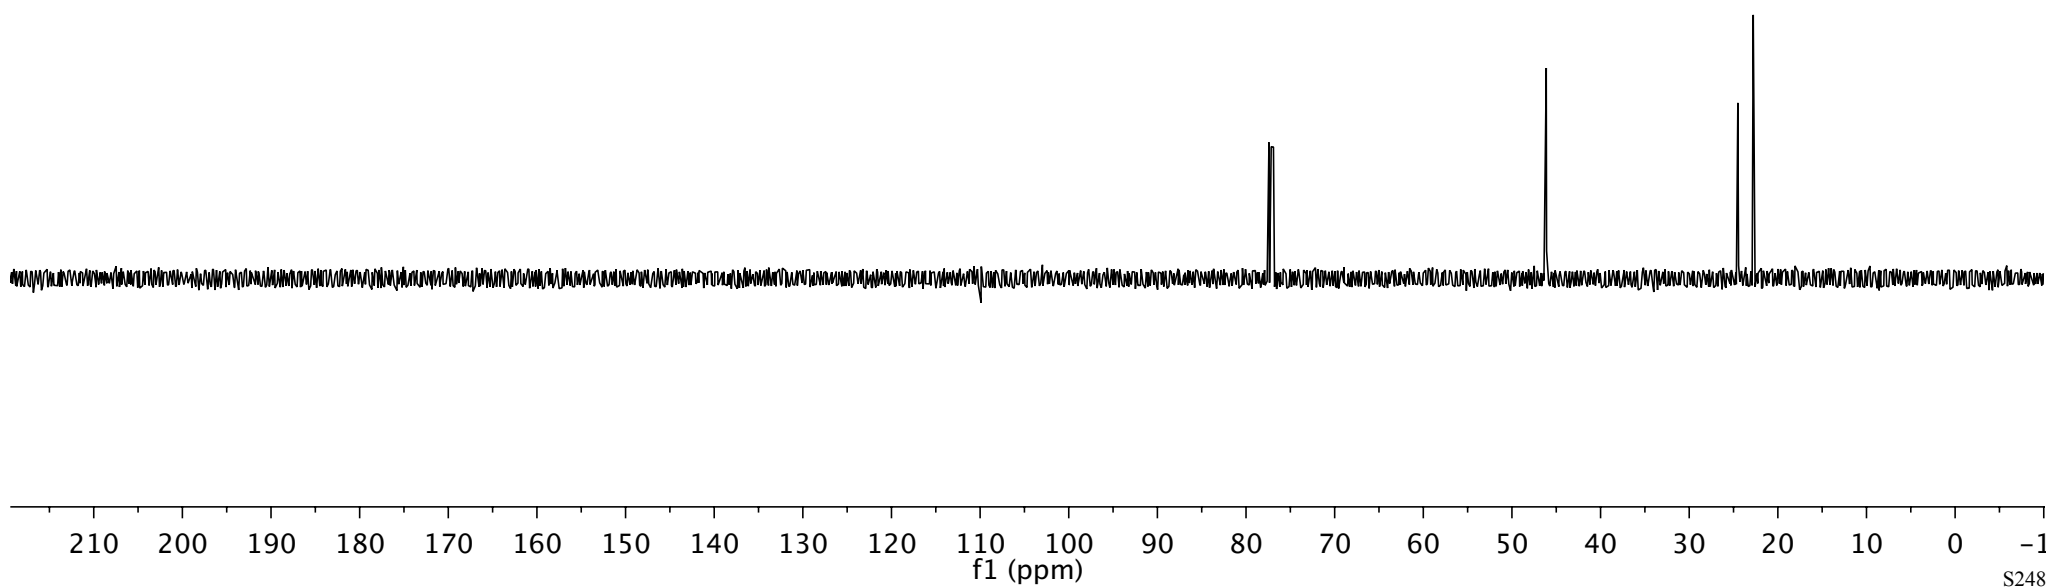

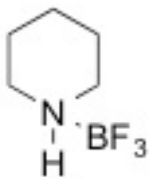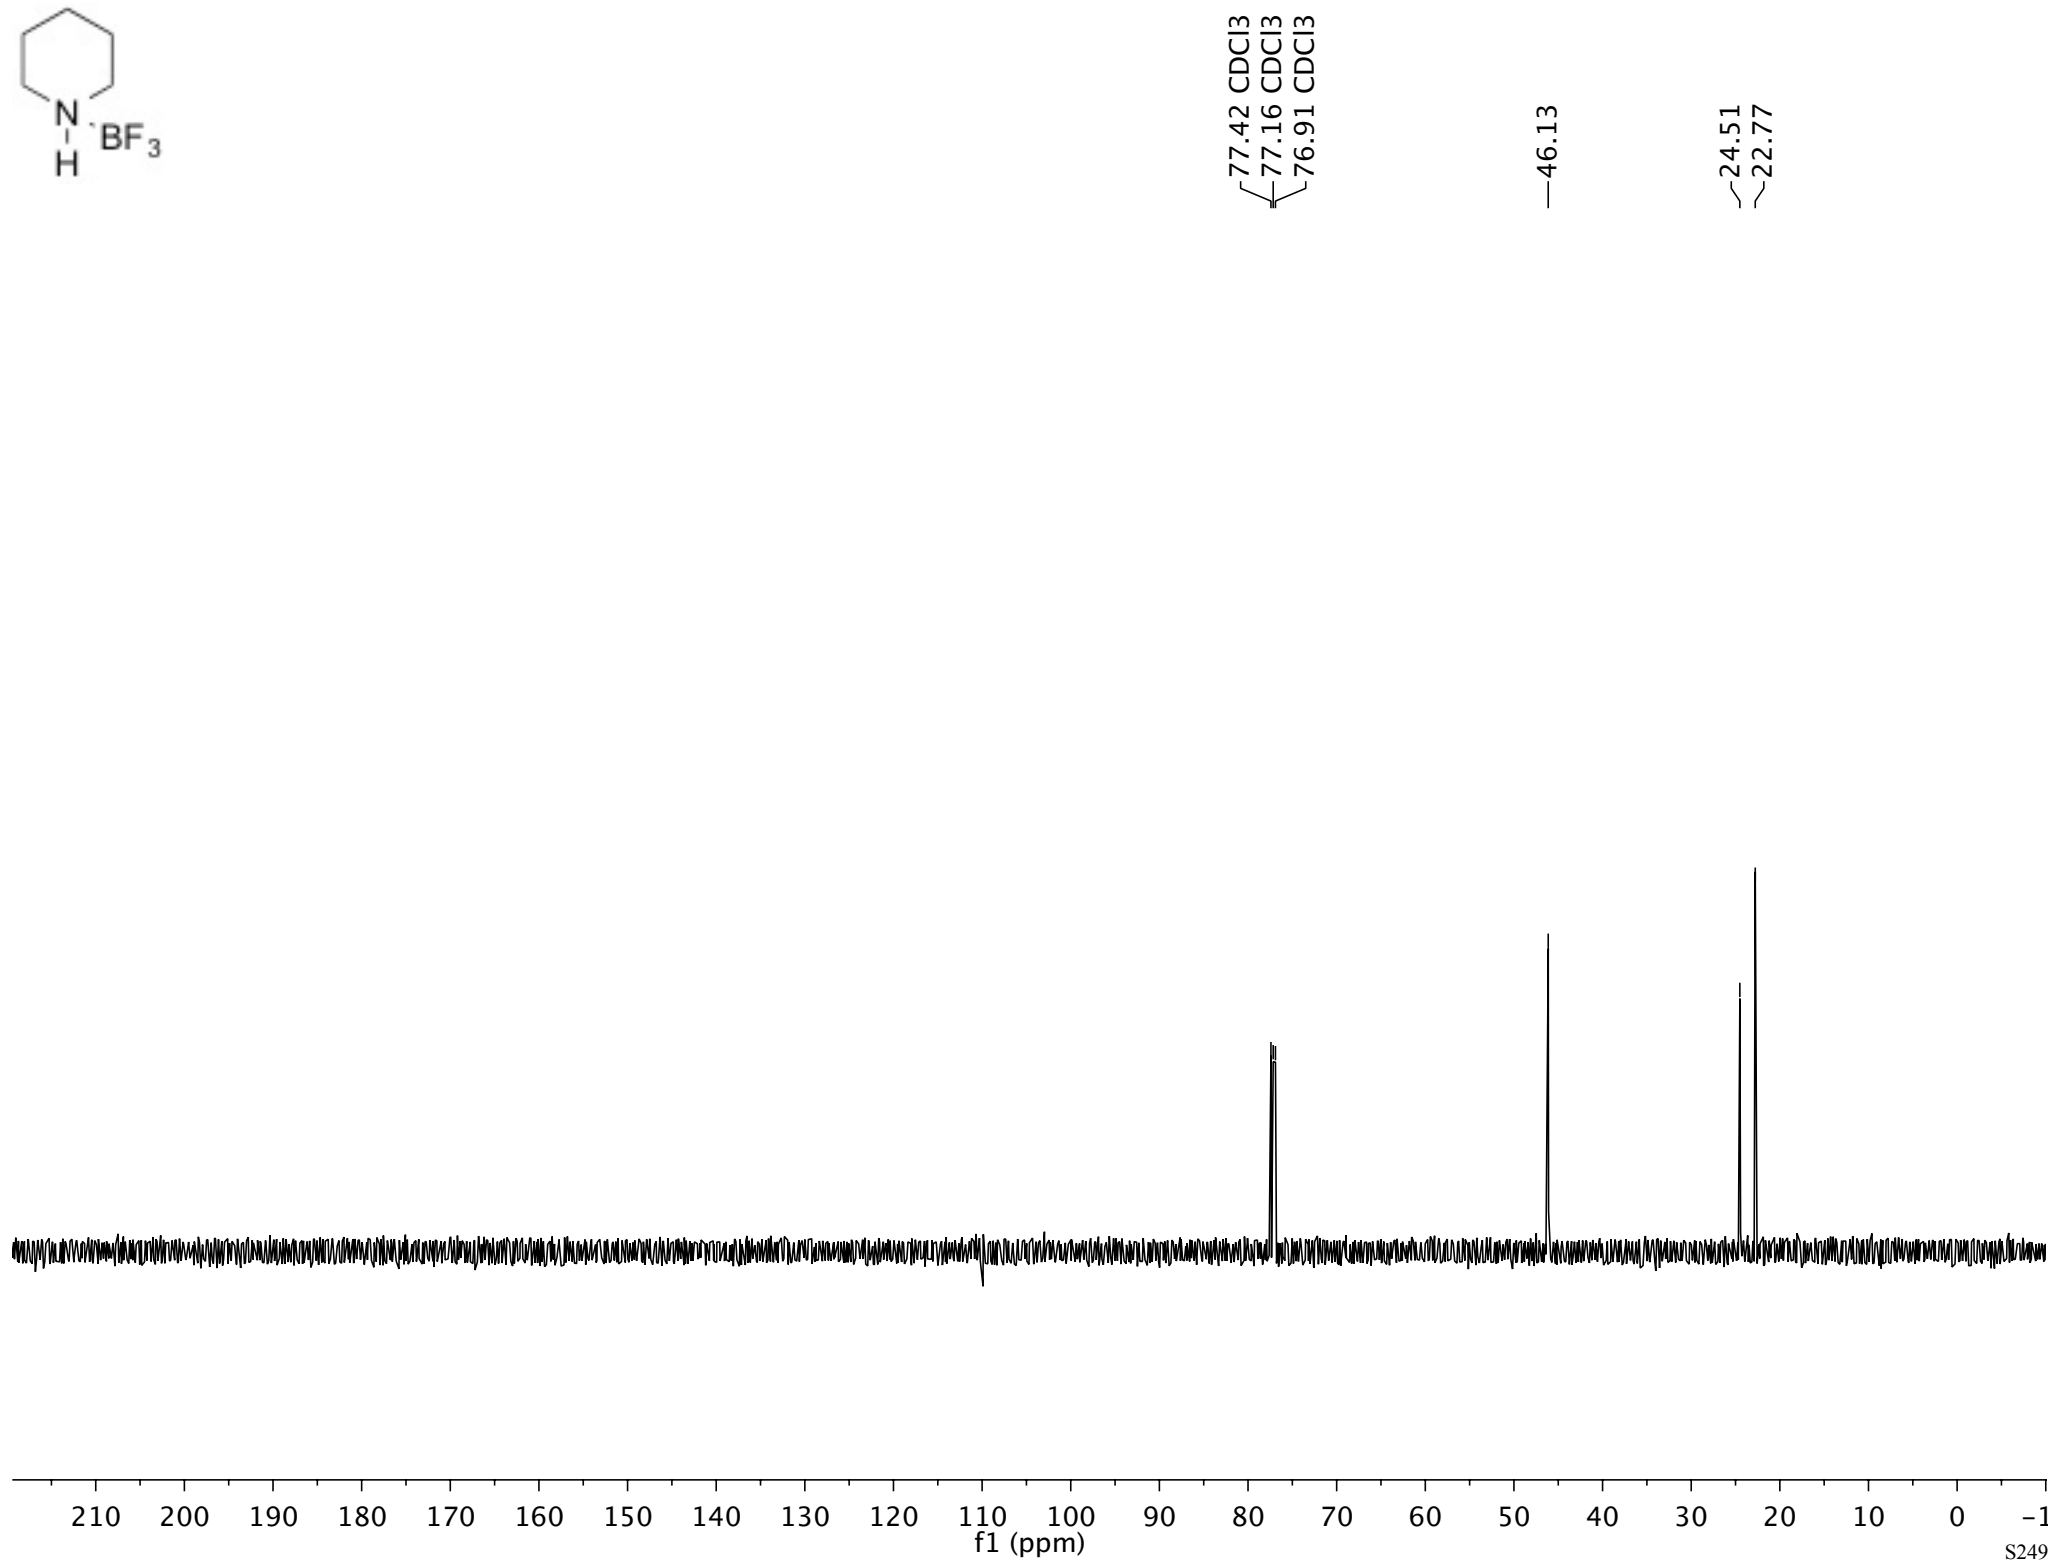

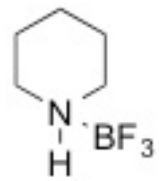

| Parameter              | Value    |
|------------------------|----------|
| Origin                 | Varian   |
| Spectrometer           | inova    |
| Solvent                | CDCl3    |
| Temperature            | 20.0     |
| Pulse Sequence         | s2pul    |
| Experiment             | 1D       |
| Probe                  | QUAD     |
| Receiver Gain          | 50       |
| Relaxation Delay       | 0.0000   |
| Pulse Width            | 0.0000   |
| Acquisition Time       | 0.3277   |
| Spectrometer Frequency | 470.15   |
| Spectral Width         | 100000.0 |
| Lowest Frequency       | -79544.1 |
| Nucleus                | 19F      |
| Acquired Size          | 32768    |
| Spectral Size          | 65536    |

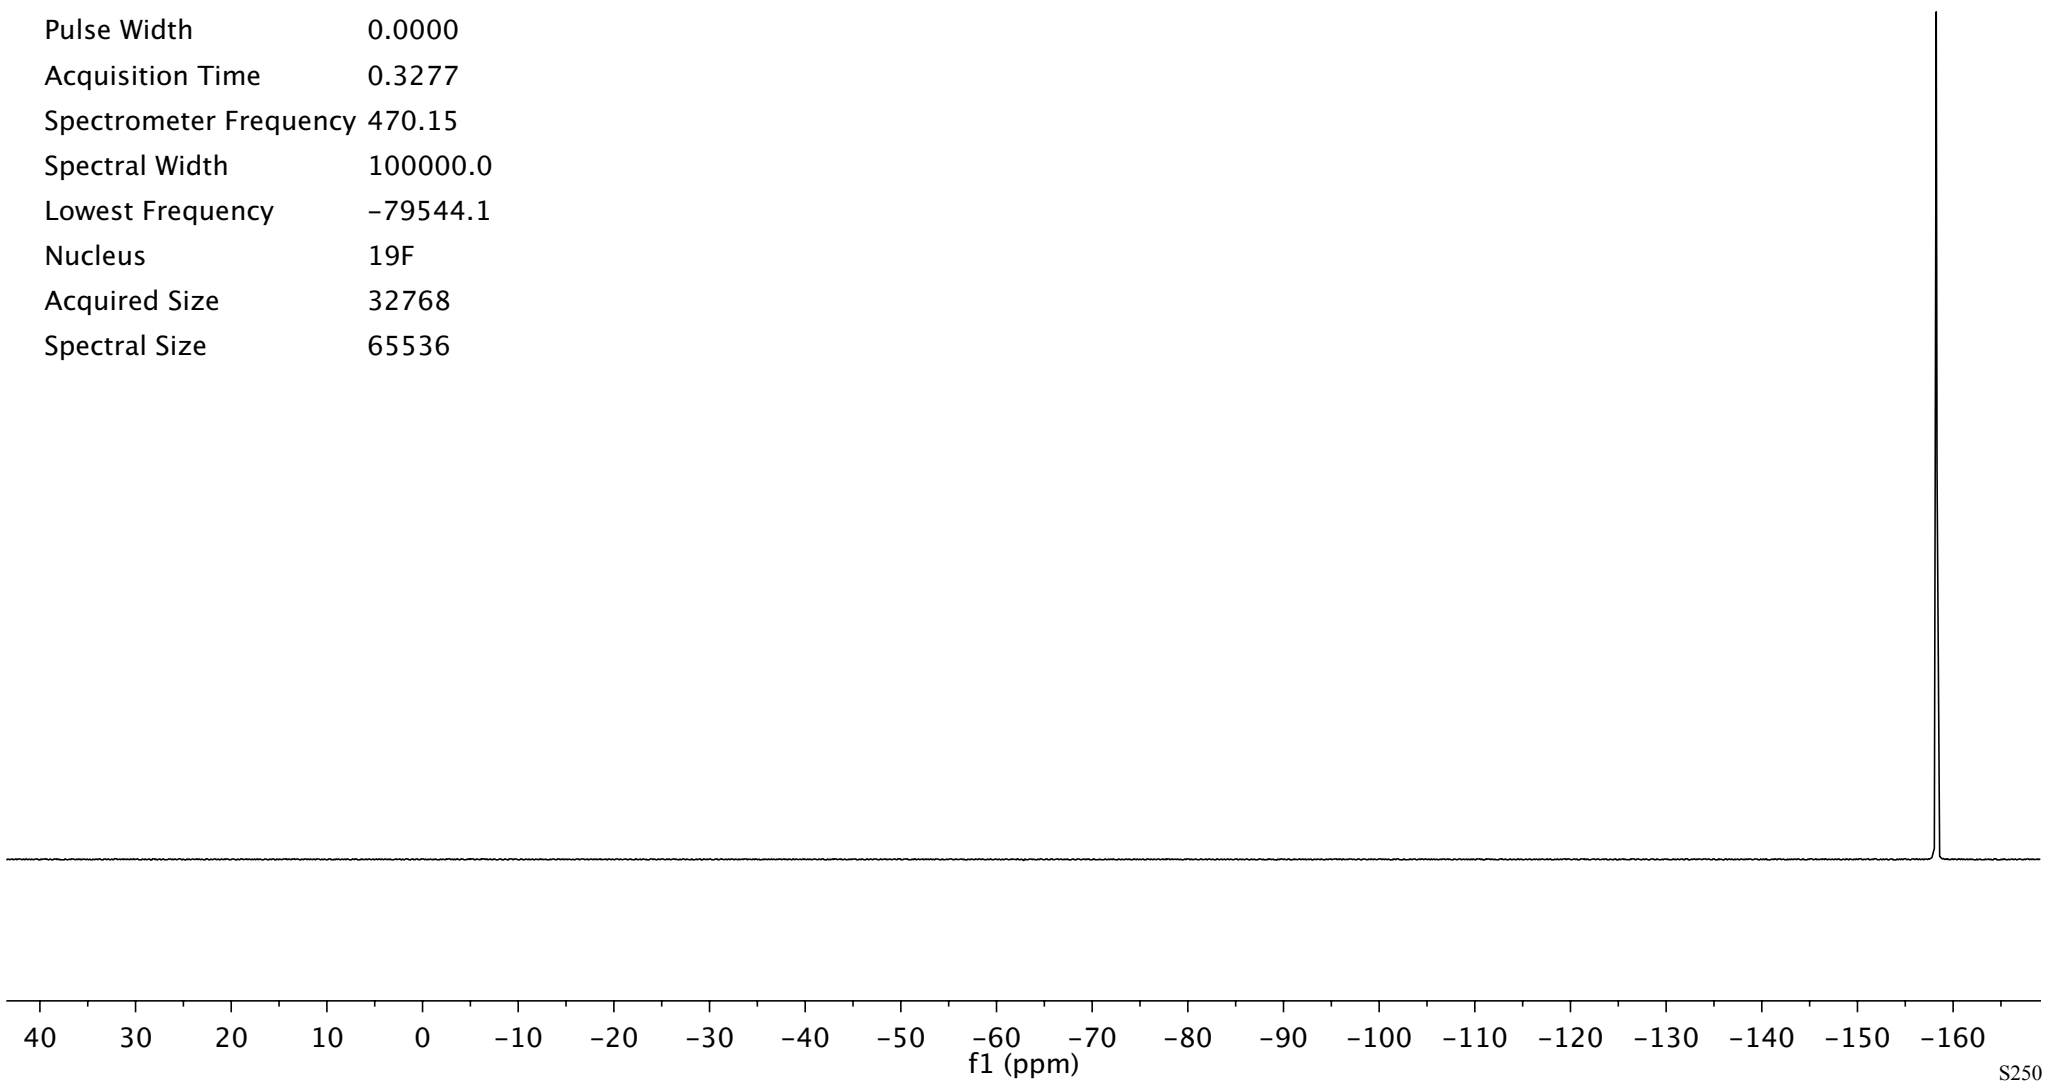



158.20  
158.23  
158.27

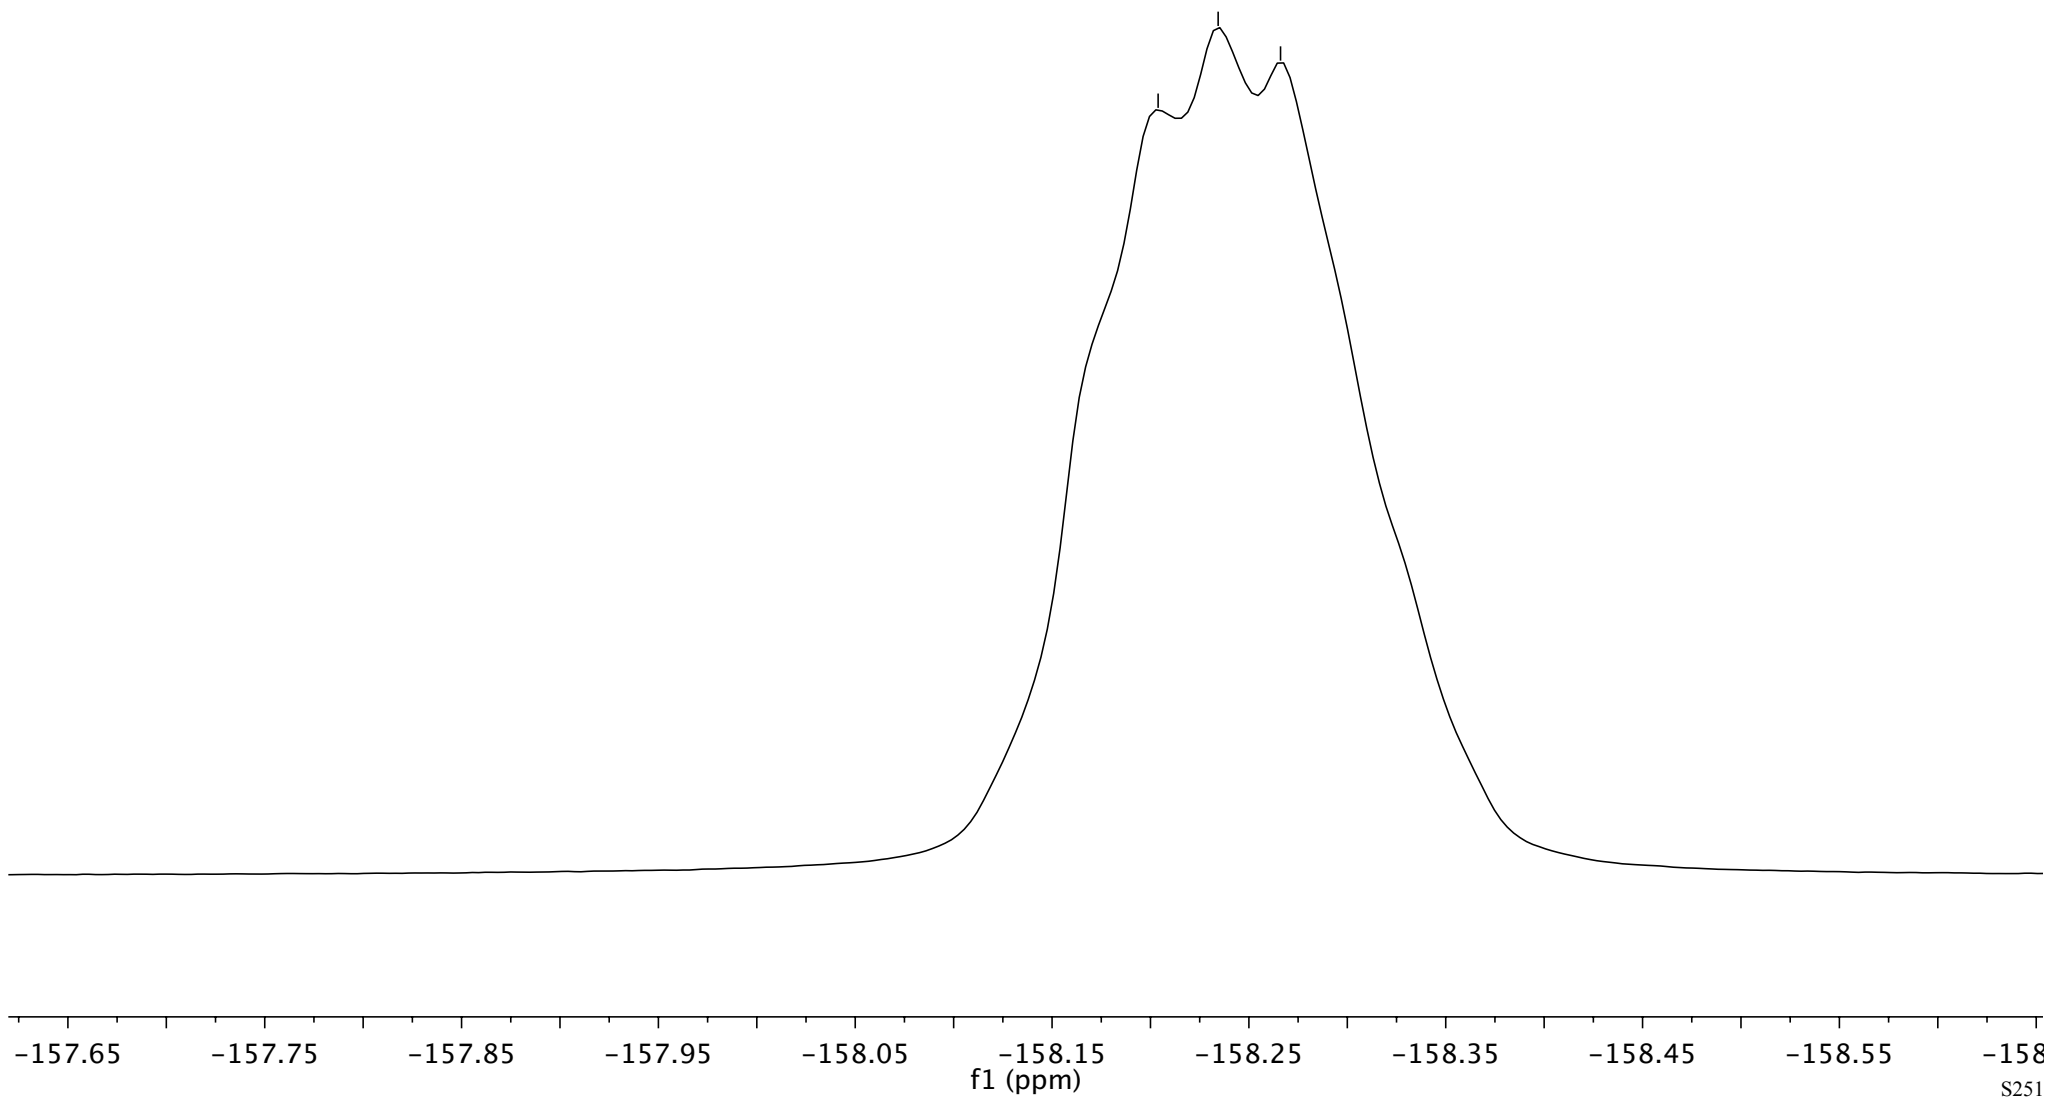

| Parameter              | Value             |
|------------------------|-------------------|
| Origin                 | Varian            |
| Spectrometer           | inova             |
| Solvent                | CDCl <sub>3</sub> |
| Temperature            | 20.0              |
| Pulse Sequence         | s2pul             |
| Experiment             | 1D                |
| Probe                  | hcn               |
| Number of Scans        | 16                |
| Receiver Gain          | 26                |
| Relaxation Delay       | 2.0000            |
| Pulse Width            | 0.0000            |
| Acquisition Time       | 4.0960            |
| Spectrometer Frequency | 500.07            |
| Spectral Width         | 8000.0            |
| Lowest Frequency       | -1520.6           |
| Nucleus                | <sup>1</sup> H    |
| Acquired Size          | 32768             |
| Spectral Size          | 65536             |

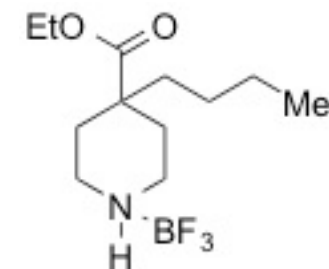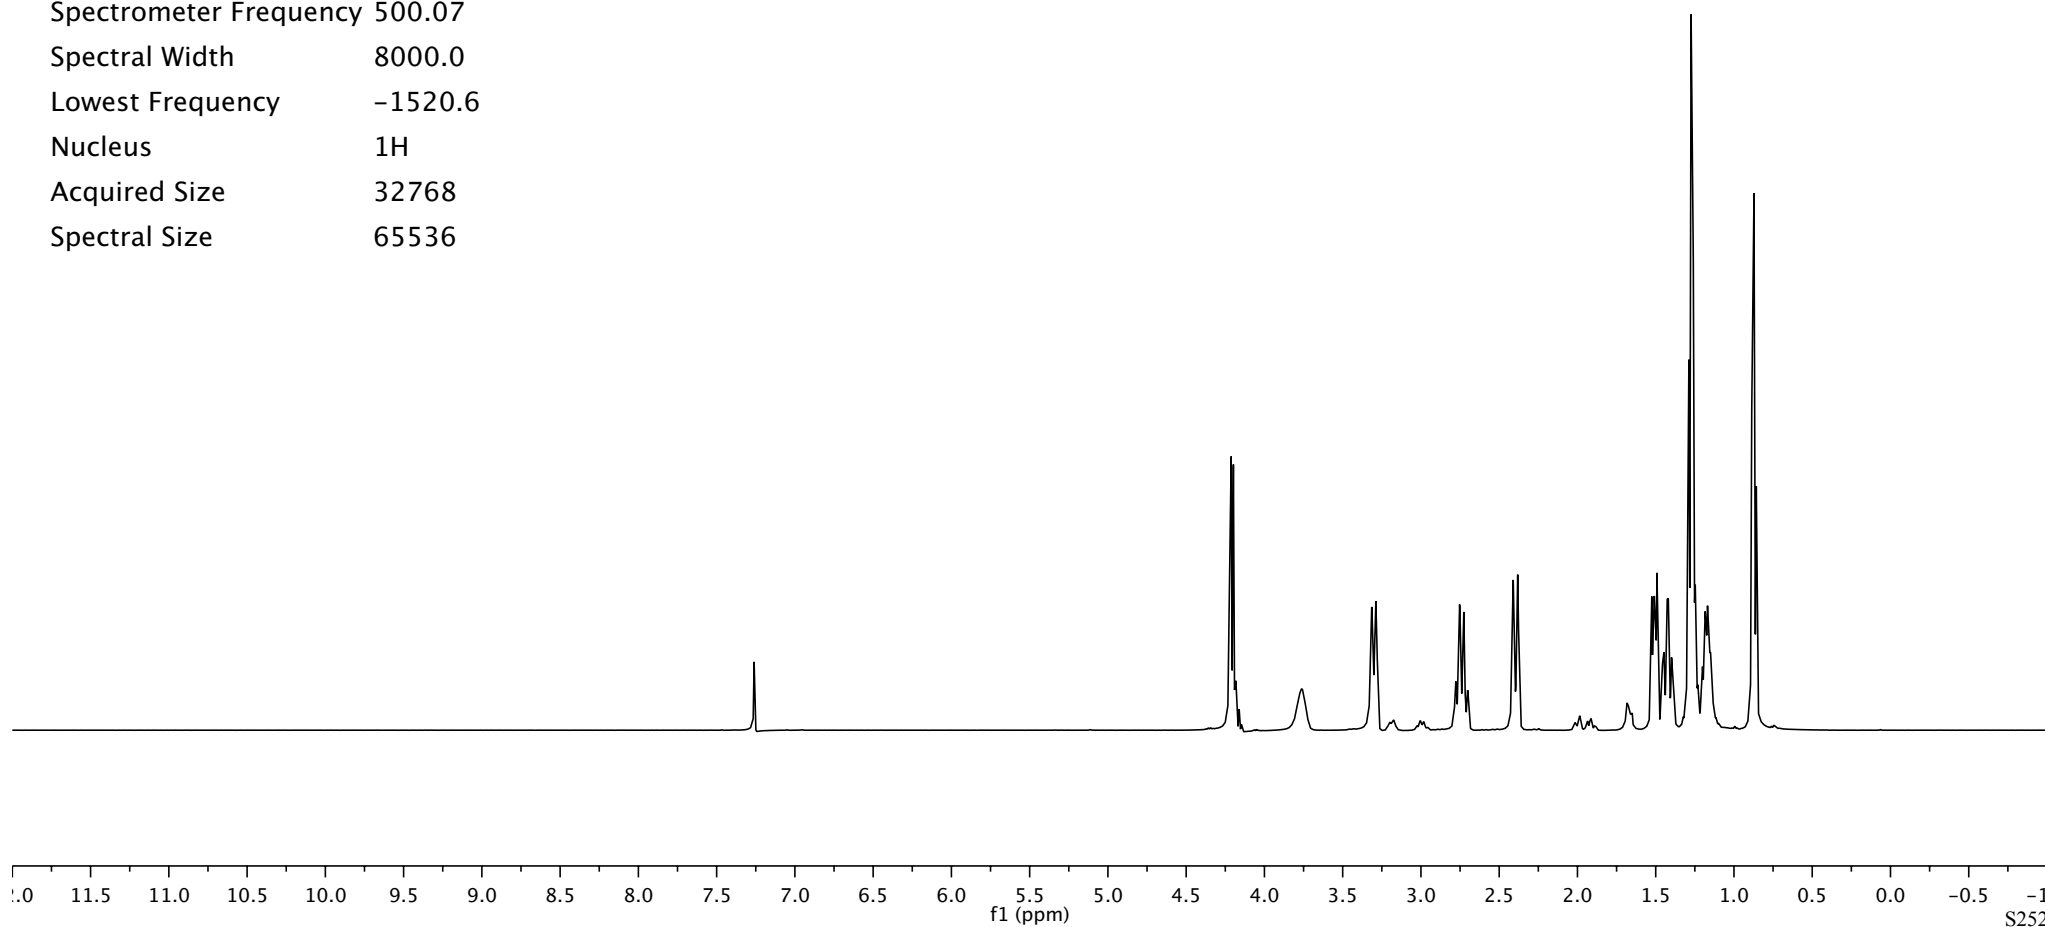

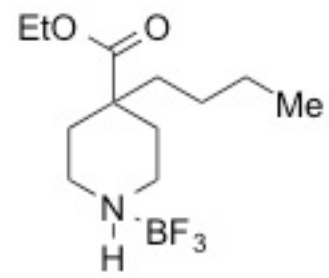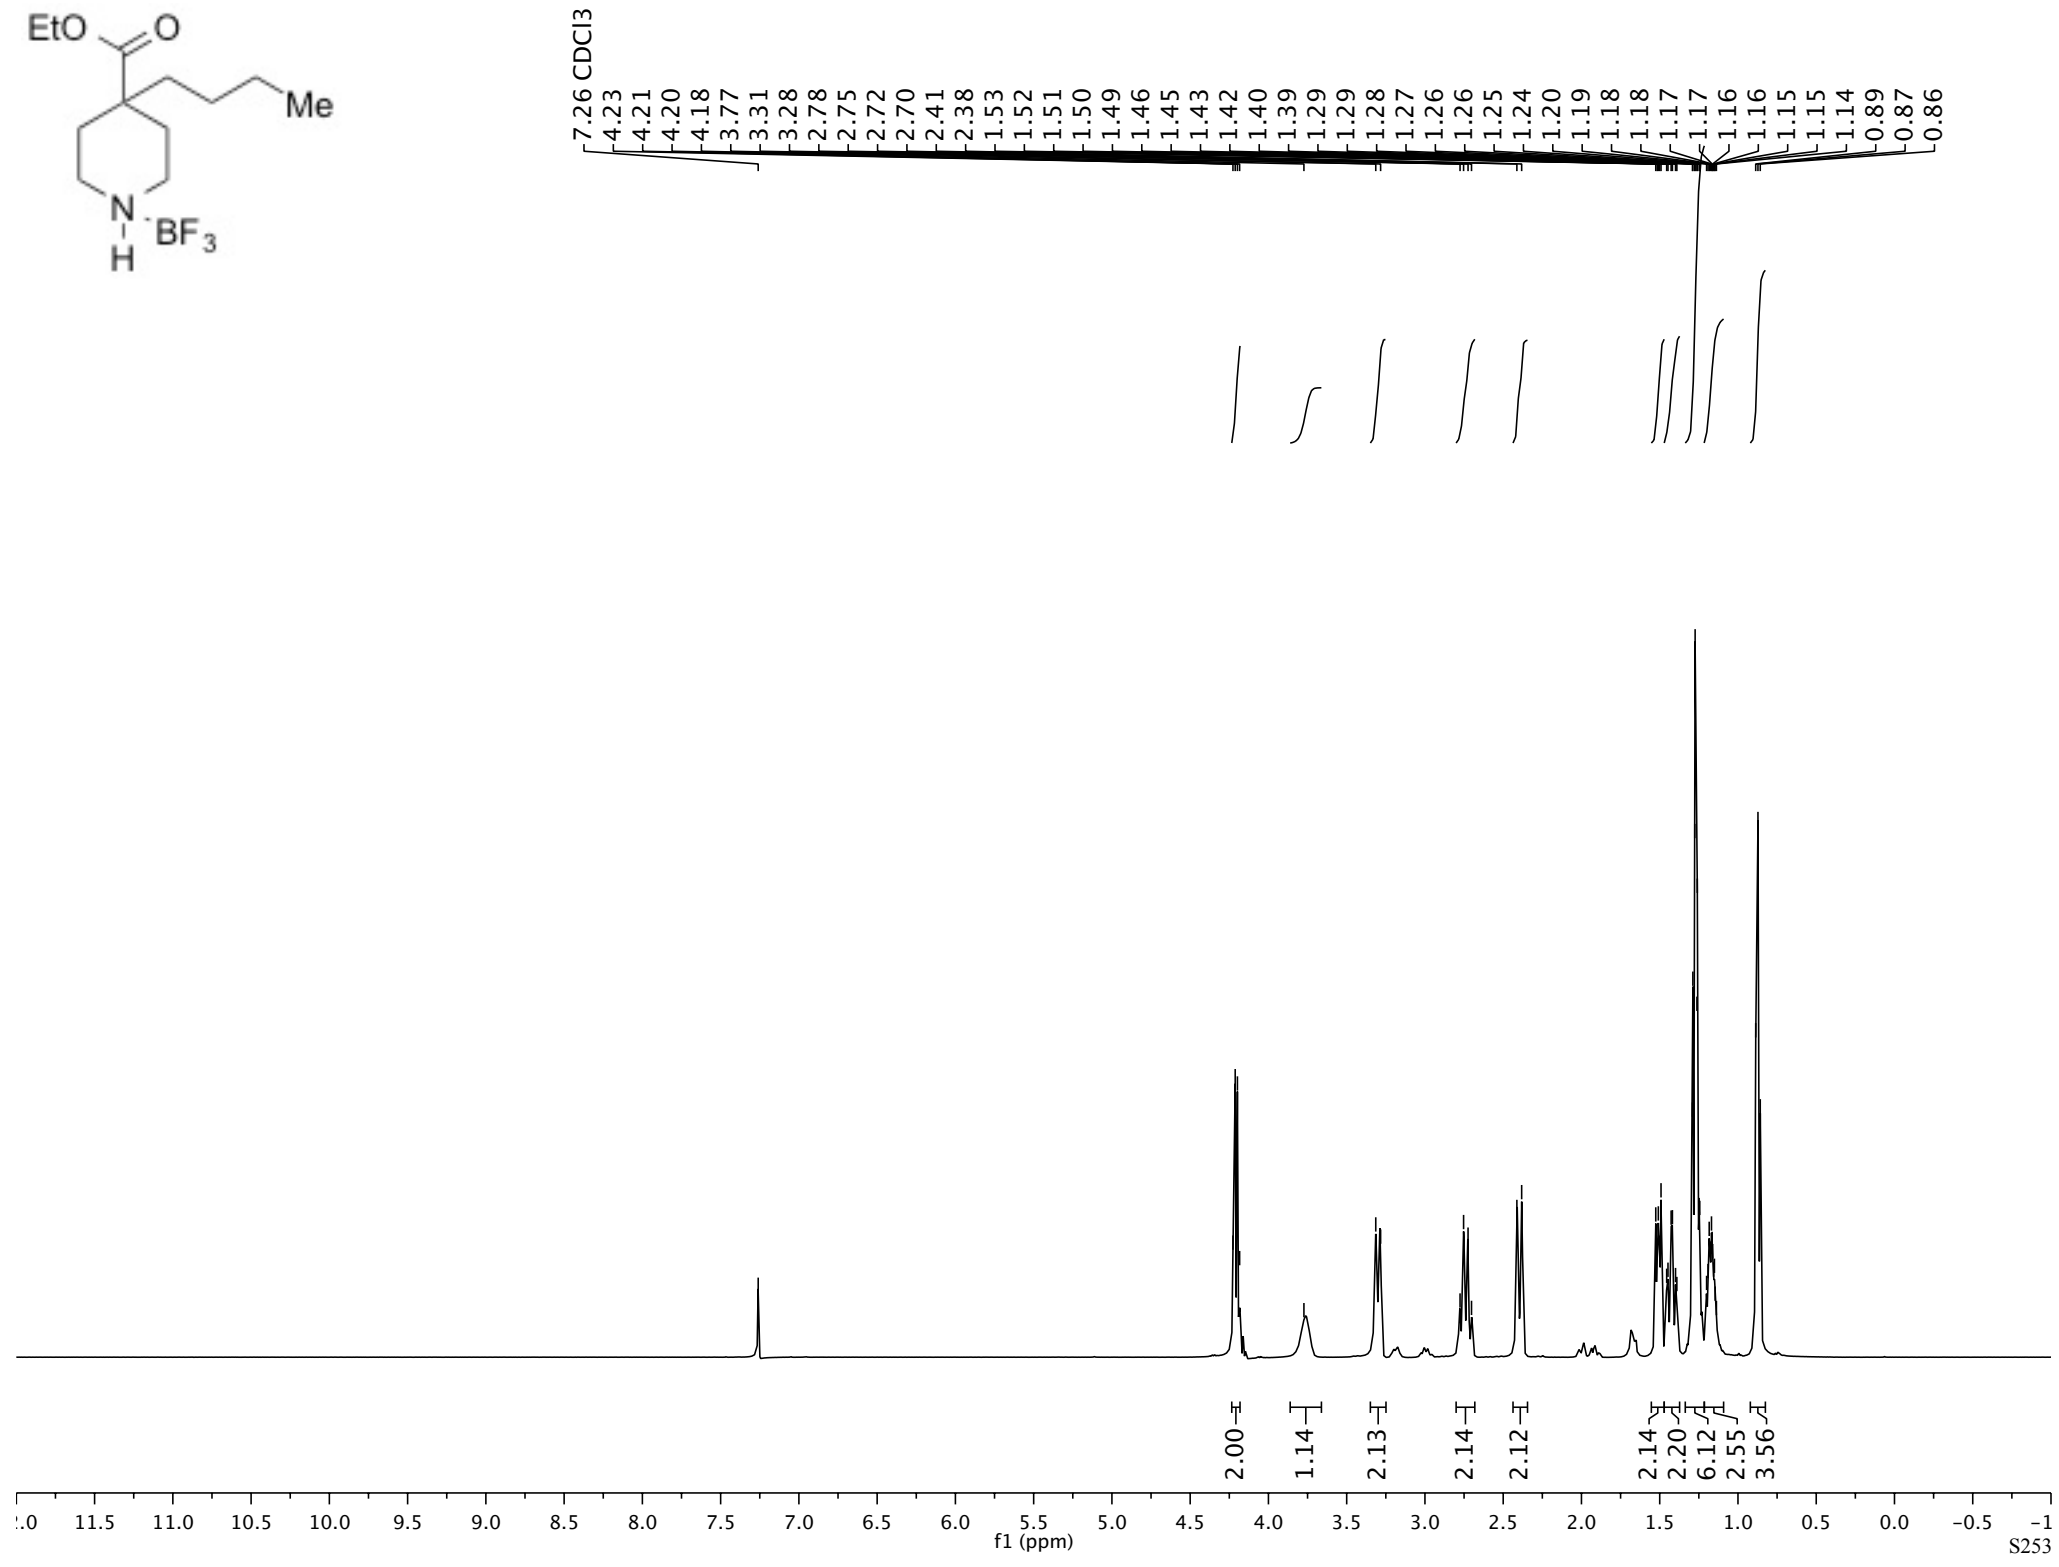

| Parameter              | Value             |
|------------------------|-------------------|
| Origin                 | Varian            |
| Spectrometer           | inova             |
| Solvent                | CDCl <sub>3</sub> |
| Temperature            | 20.0              |
| Pulse Sequence         | s2pul             |
| Experiment             | 1D                |
| Probe                  | QUAD              |
| Number of Scans        | 222               |
| Receiver Gain          | 60                |
| Relaxation Delay       | 2.0000            |
| Pulse Width            | 0.0000            |
| Acquisition Time       | 1.0863            |
| Spectrometer Frequency | 125.66            |
| Spectral Width         | 30165.9           |
| Lowest Frequency       | -1270.5           |
| Nucleus                | <sup>13</sup> C   |
| Acquired Size          | 32768             |
| Spectral Size          | 65536             |

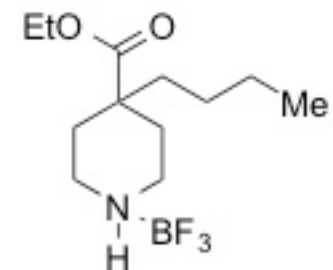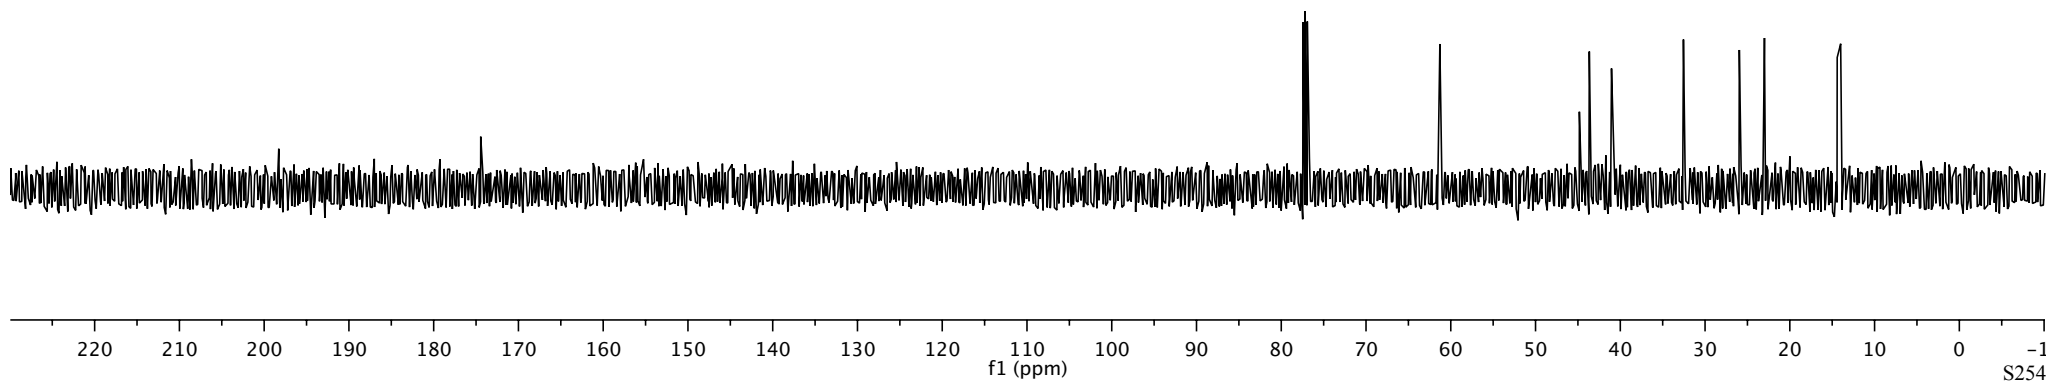

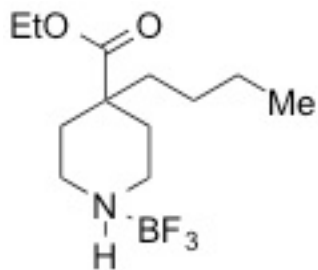

—174.45

—77.16 CDCl<sub>3</sub>

—61.29

—44.82

—43.65

—41.03

—32.54

—25.95

—22.99

—14.40

—14.00

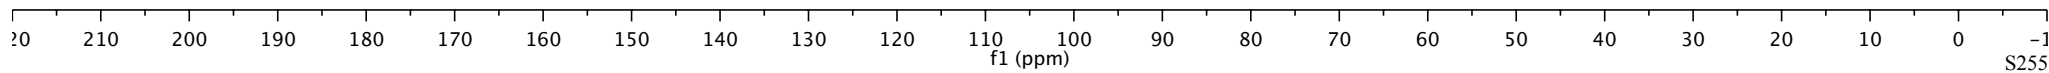



KF-IV-65\_19F  
7.30.2015  
KF-IV-65\_19F

| Parameter              | Value    |
|------------------------|----------|
| Origin                 | Varian   |
| Spectrometer           | inova    |
| Solvent                | CDCl3    |
| Temperature            | 20.0     |
| Pulse Sequence         | s2pul    |
| Experiment             | 1D       |
| Probe                  | QUAD     |
| Number of Scans        | 132      |
| Receiver Gain          | 60       |
| Relaxation Delay       | 0.0000   |
| Pulse Width            | 0.0000   |
| Acquisition Time       | 0.3277   |
| Spectrometer Frequency | 470.15   |
| Spectral Width         | 100000.0 |
| Lowest Frequency       | -79501.3 |
| Nucleus                | 19F      |
| Acquired Size          | 32768    |
| Spectral Size          | 65536    |

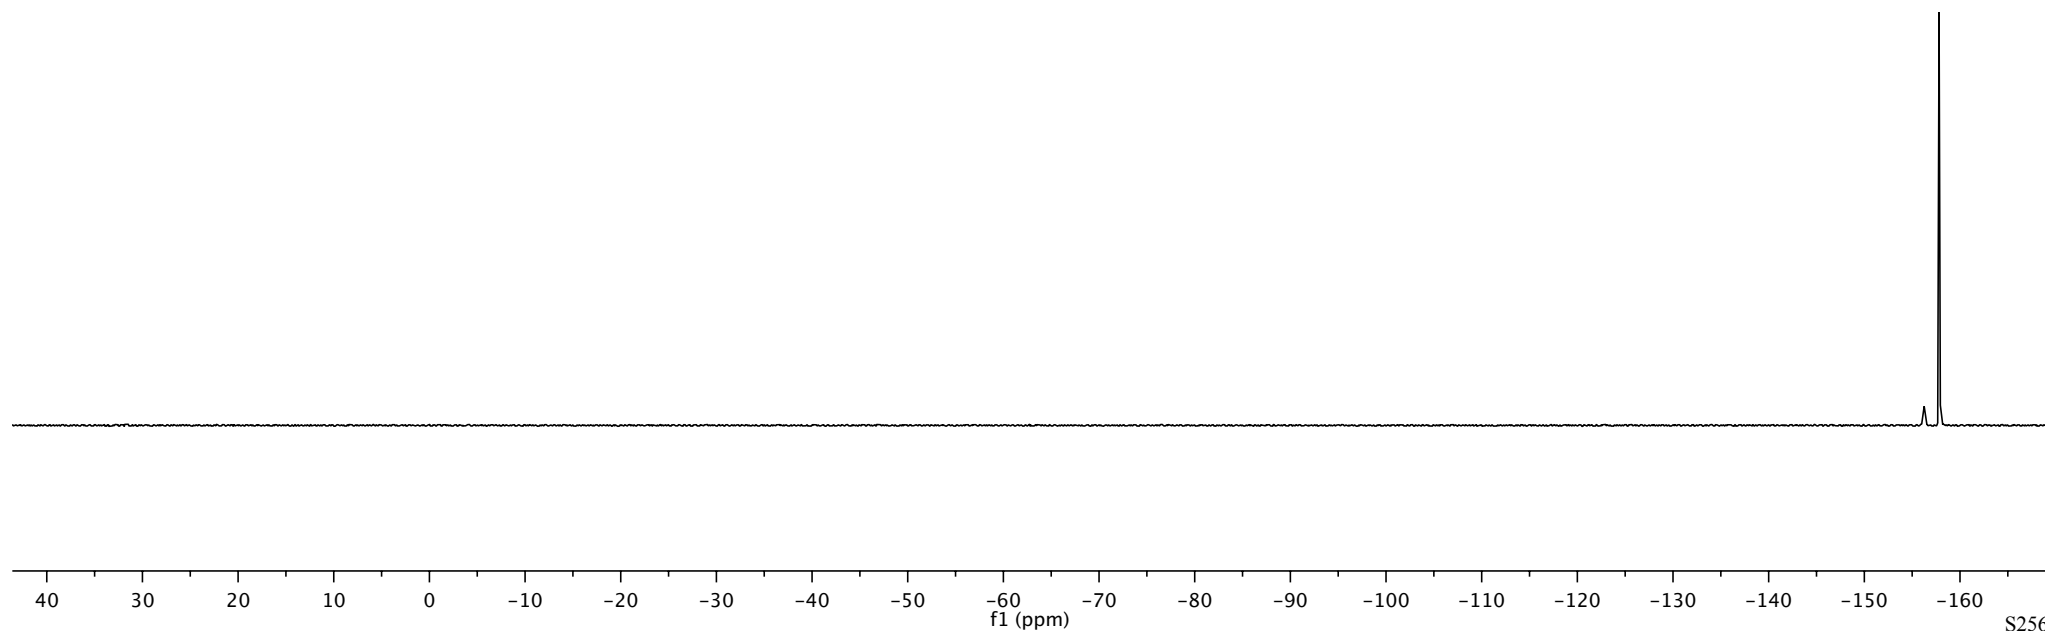

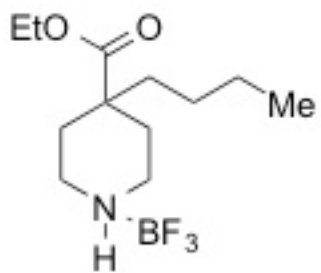

157.78  
157.81  
157.85  
157.88

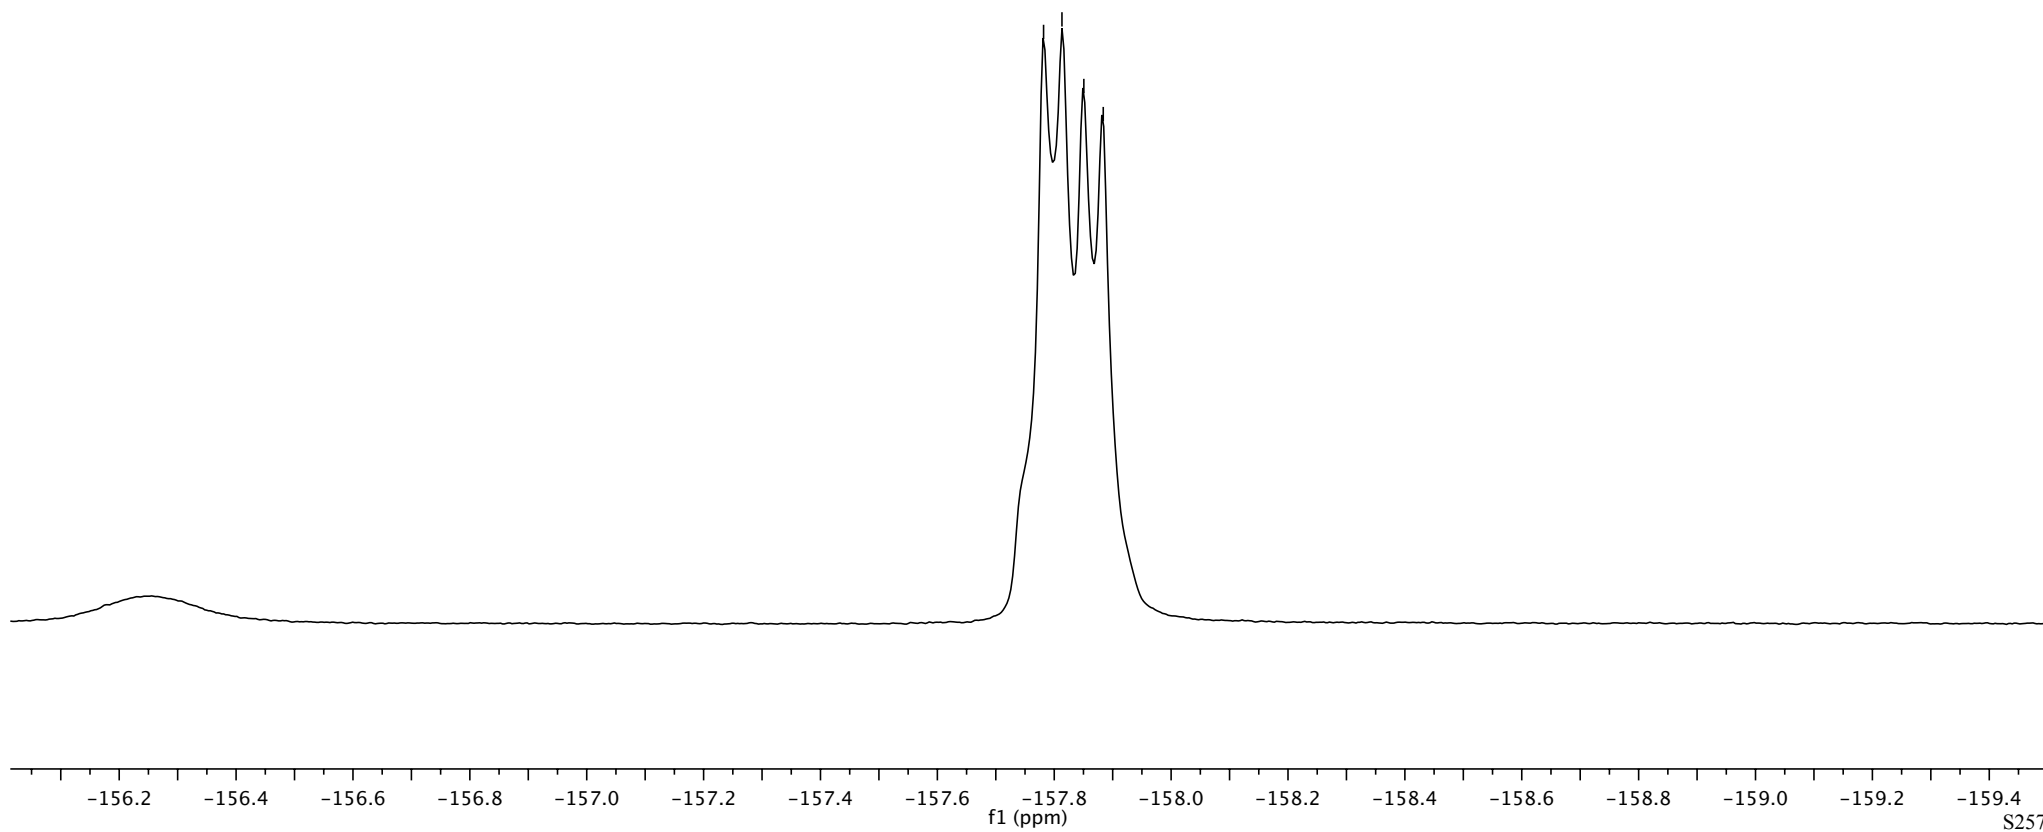

| Parameter              | Value   |
|------------------------|---------|
| Origin                 | Varian  |
| Spectrometer           | inova   |
| Solvent                | CDCl3   |
| Temperature            | 20.0    |
| Pulse Sequence         | s2pul   |
| Experiment             | 1D      |
| Probe                  | QUADG   |
| Receiver Gain          | 52      |
| Relaxation Delay       | 0.0000  |
| Pulse Width            | 0.0000  |
| Acquisition Time       | 4.0960  |
| Spectrometer Frequency | 499.43  |
| Spectral Width         | 8000.0  |
| Lowest Frequency       | -1518.2 |
| Nucleus                | 1H      |
| Acquired Size          | 32768   |
| Spectral Size          | 65536   |

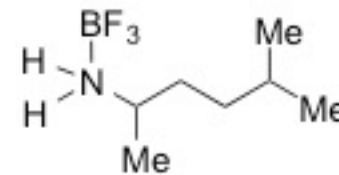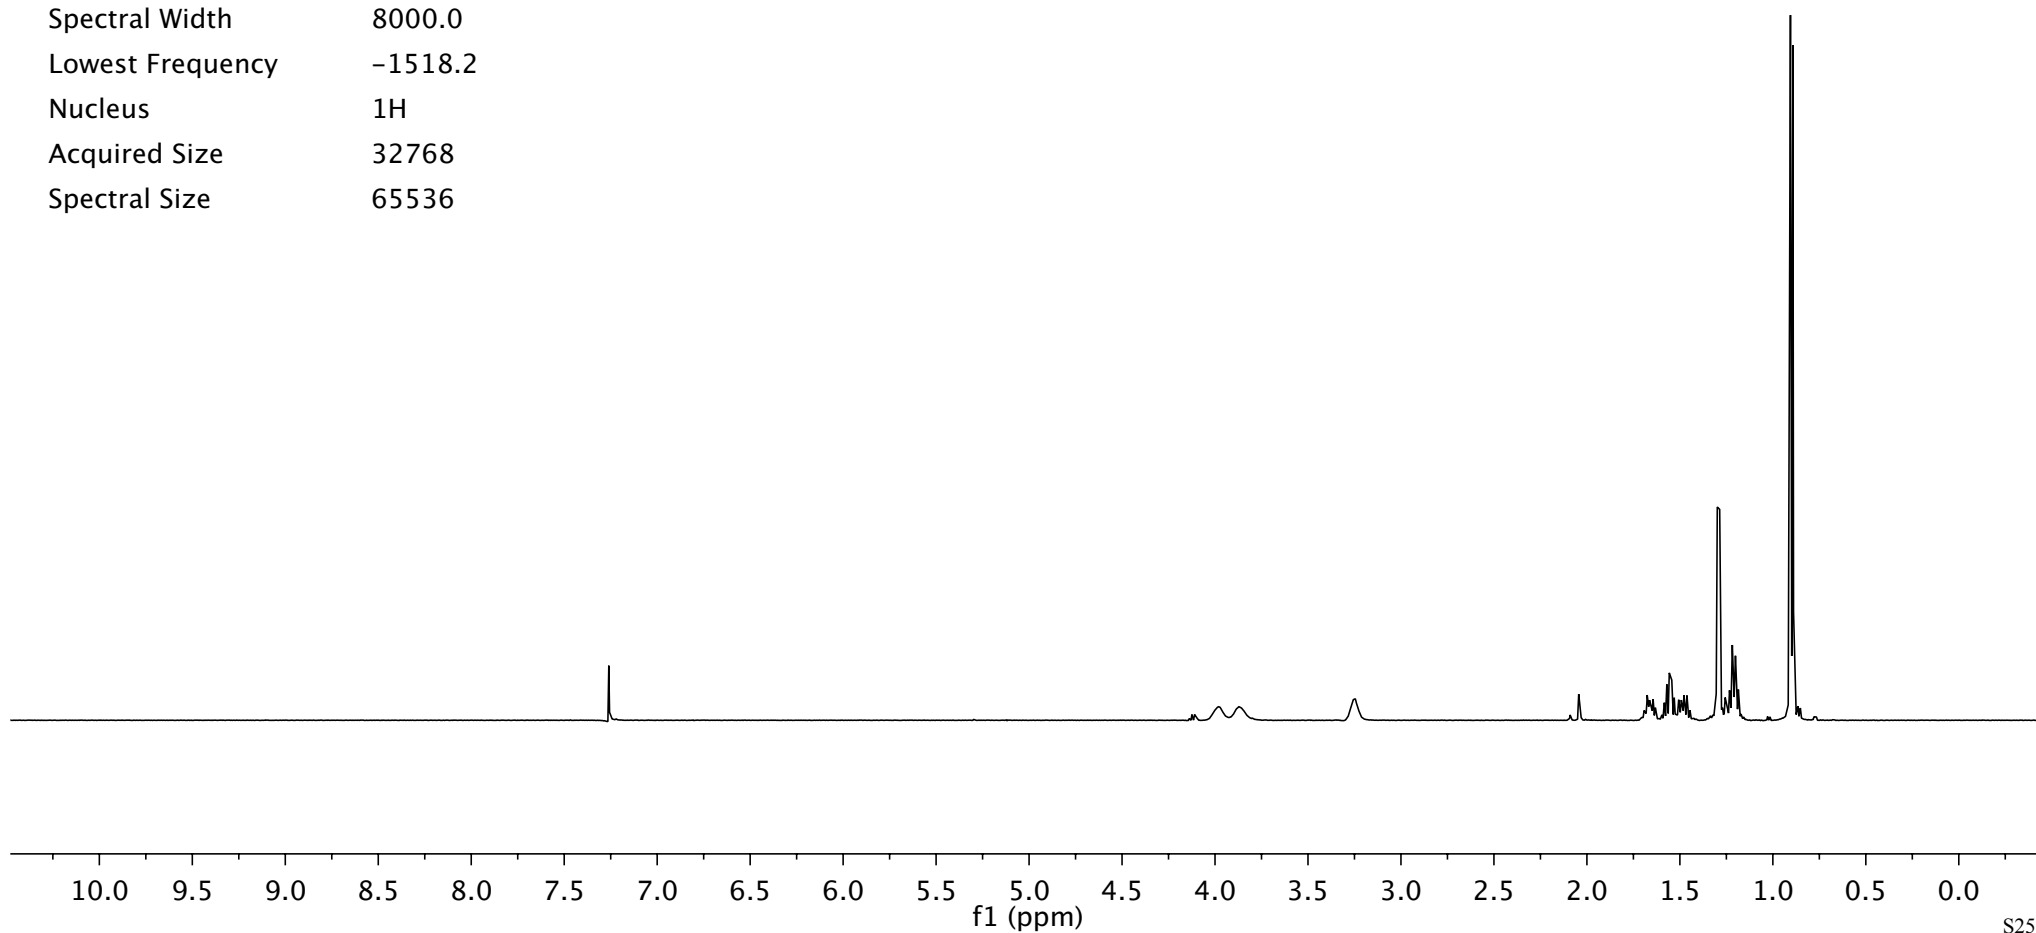

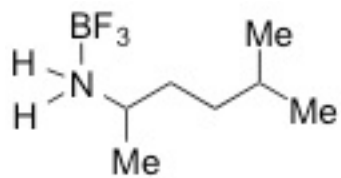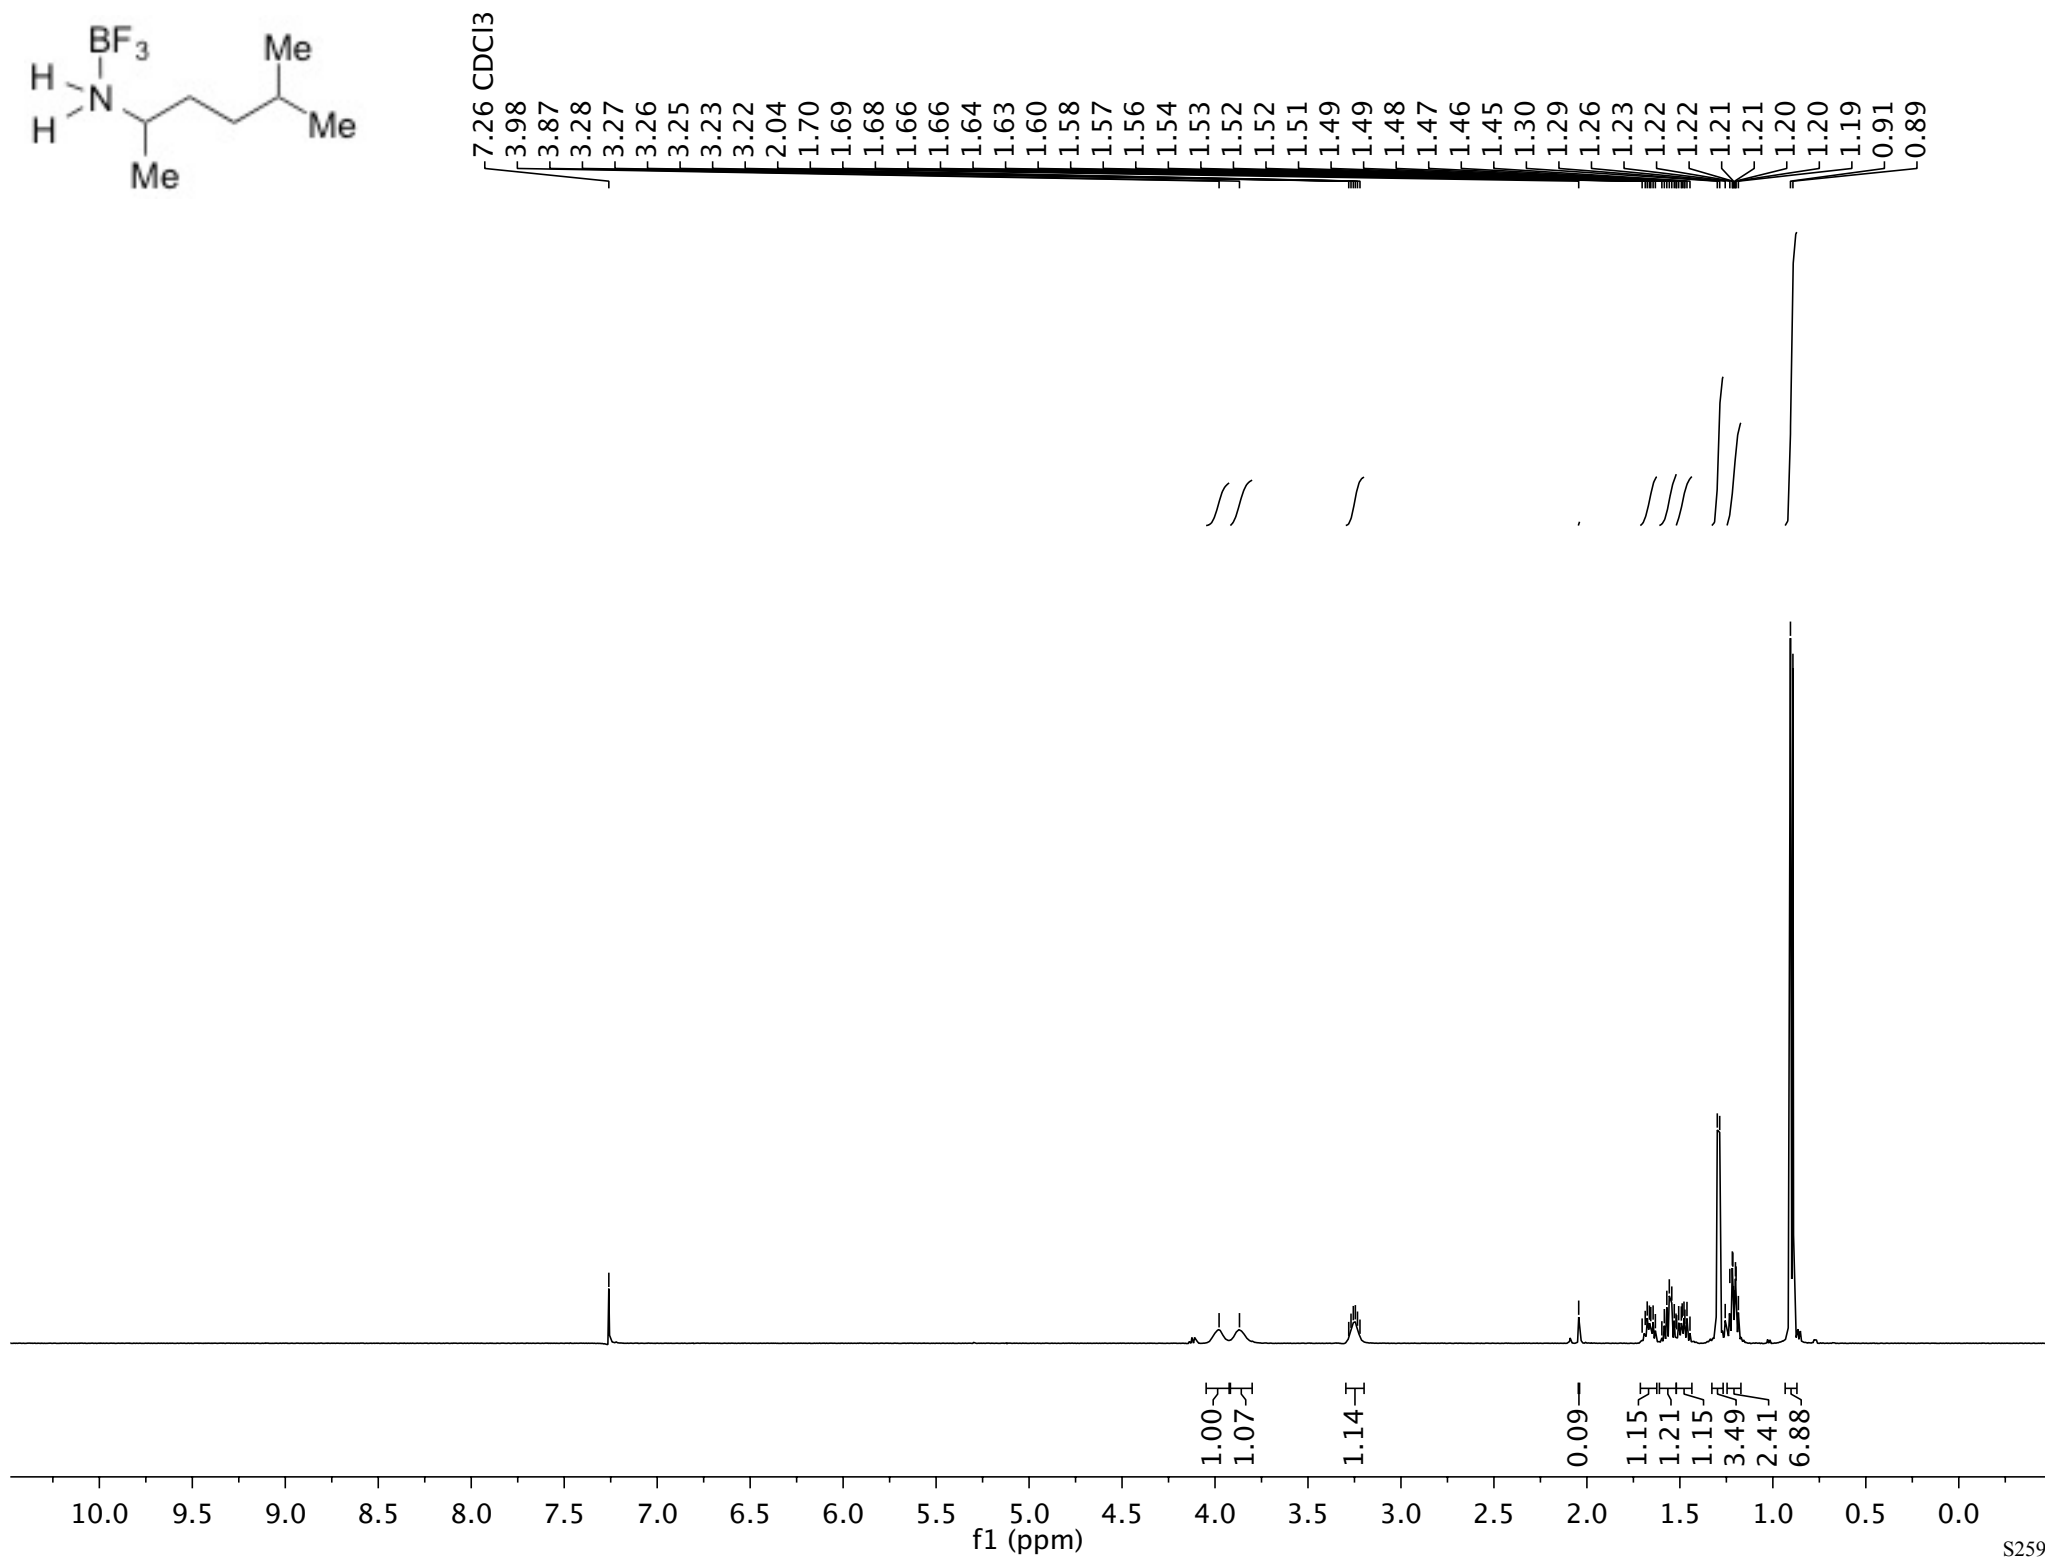

| Parameter              | Value           |
|------------------------|-----------------|
| Origin                 | Varian          |
| Spectrometer           | inova           |
| Solvent                | CDCl3           |
| Temperature            | 20.0            |
| Pulse Sequence         | s2pul           |
| Experiment             | 1D              |
| Probe                  | QUADG           |
| Receiver Gain          | 60              |
| Relaxation Delay       | 2.0000          |
| Pulse Width            | 0.0000          |
| Acquisition Time       | 1.0240          |
| Spectrometer Frequency | 125.60          |
| Spectral Width         | 32000.0         |
| Lowest Frequency       | -2200.7         |
| Nucleus                | <sup>13</sup> C |
| Acquired Size          | 32768           |
| Spectral Size          | 65536           |

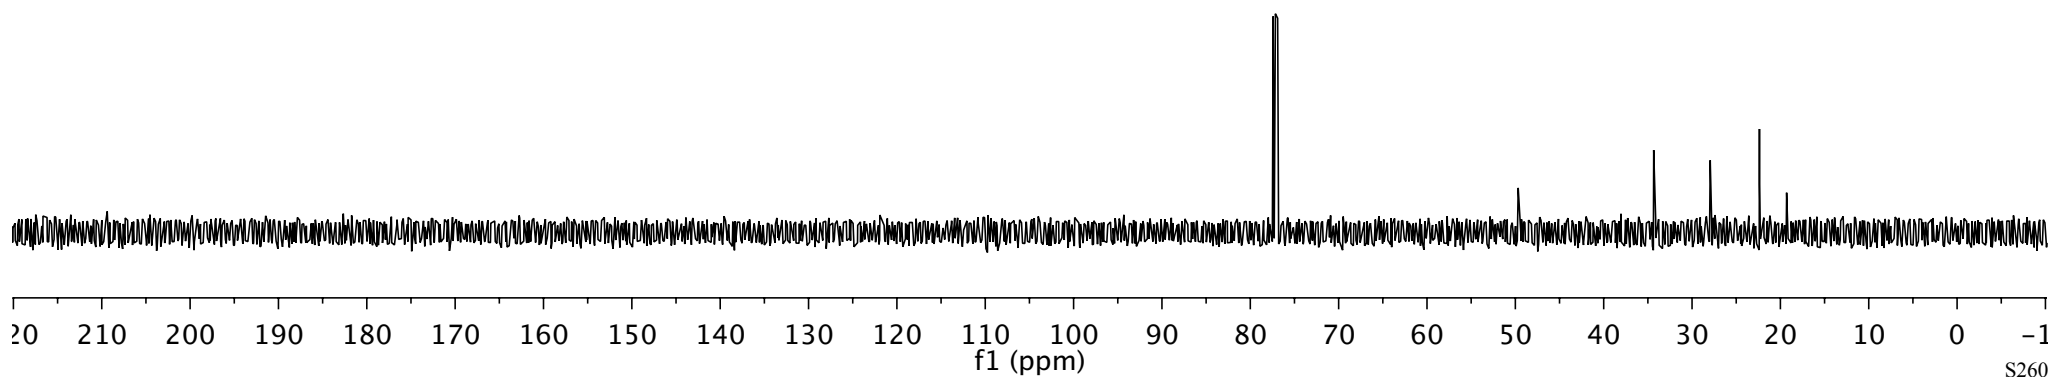

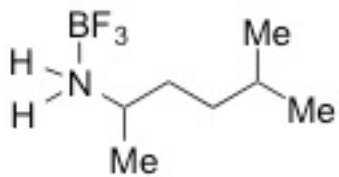

77.42 CDCl3  
77.16 CDCl3  
76.91 CDCl3

49.68

34.34  
34.23  
27.94  
22.62  
22.37  
19.30

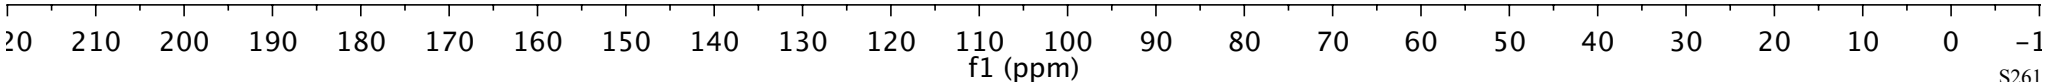

| Parameter              | Value     |
|------------------------|-----------|
| Origin                 | Varian    |
| Spectrometer           | inova     |
| Solvent                | CDCl3     |
| Temperature            | 20.0      |
| Pulse Sequence         | s2pul     |
| Experiment             | 1D        |
| Probe                  | QUADG     |
| Receiver Gain          | 56        |
| Relaxation Delay       | 1.5000    |
| Pulse Width            | 0.0000    |
| Acquisition Time       | 0.3277    |
| Spectrometer Frequency | 469.89    |
| Spectral Width         | 122137.4  |
| Lowest Frequency       | -108111.4 |
| Nucleus                | 19F       |
| Acquired Size          | 40022     |
| Spectral Size          | 131072    |

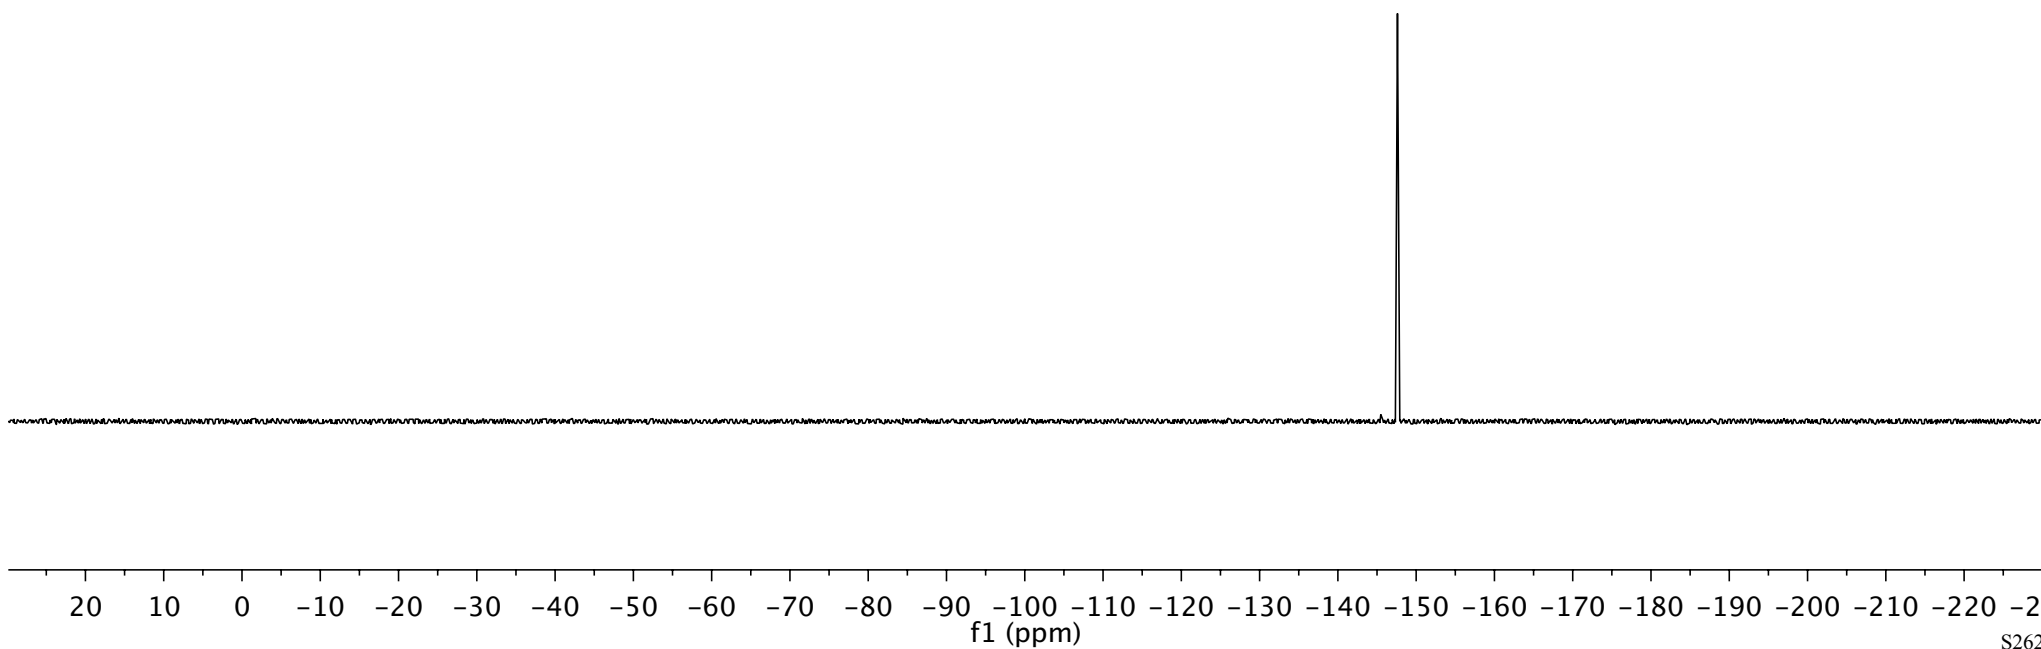

147.61  
147.65  
147.68  
147.72

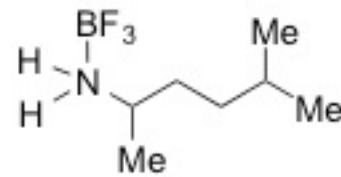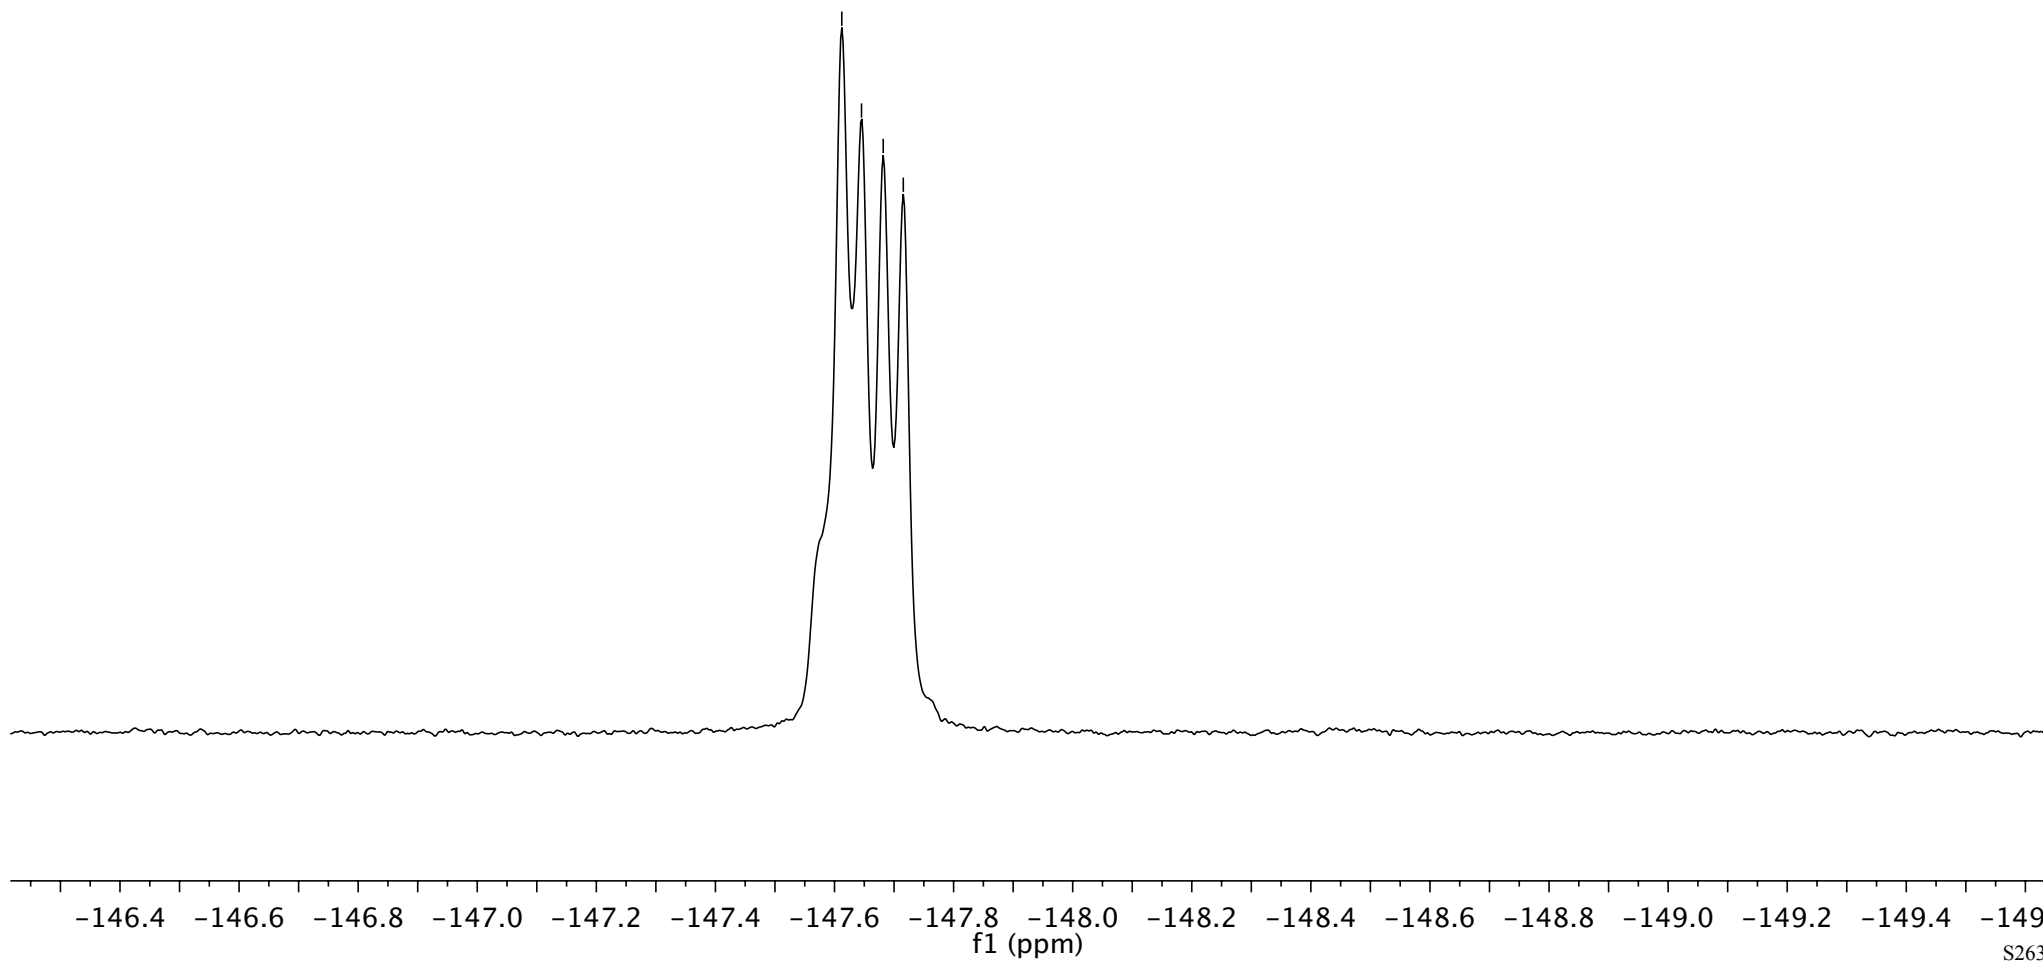



| Parameter              | Value          |
|------------------------|----------------|
| Origin                 | Varian         |
| Spectrometer           | inova          |
| Solvent                | CDCl3          |
| Temperature            | 20.0           |
| Pulse Sequence         | s2pul          |
| Experiment             | 1D             |
| Probe                  | hcn            |
| Number of Scans        | 16             |
| Receiver Gain          | 28             |
| Relaxation Delay       | 2.0000         |
| Pulse Width            | 0.0000         |
| Acquisition Time       | 4.0960         |
| Spectrometer Frequency | 500.07         |
| Spectral Width         | 8000.0         |
| Lowest Frequency       | -1521.1        |
| Nucleus                | <sup>1</sup> H |
| Acquired Size          | 32768          |
| Spectral Size          | 65536          |

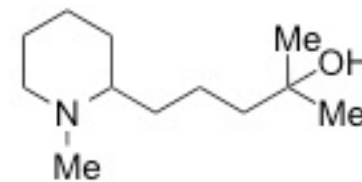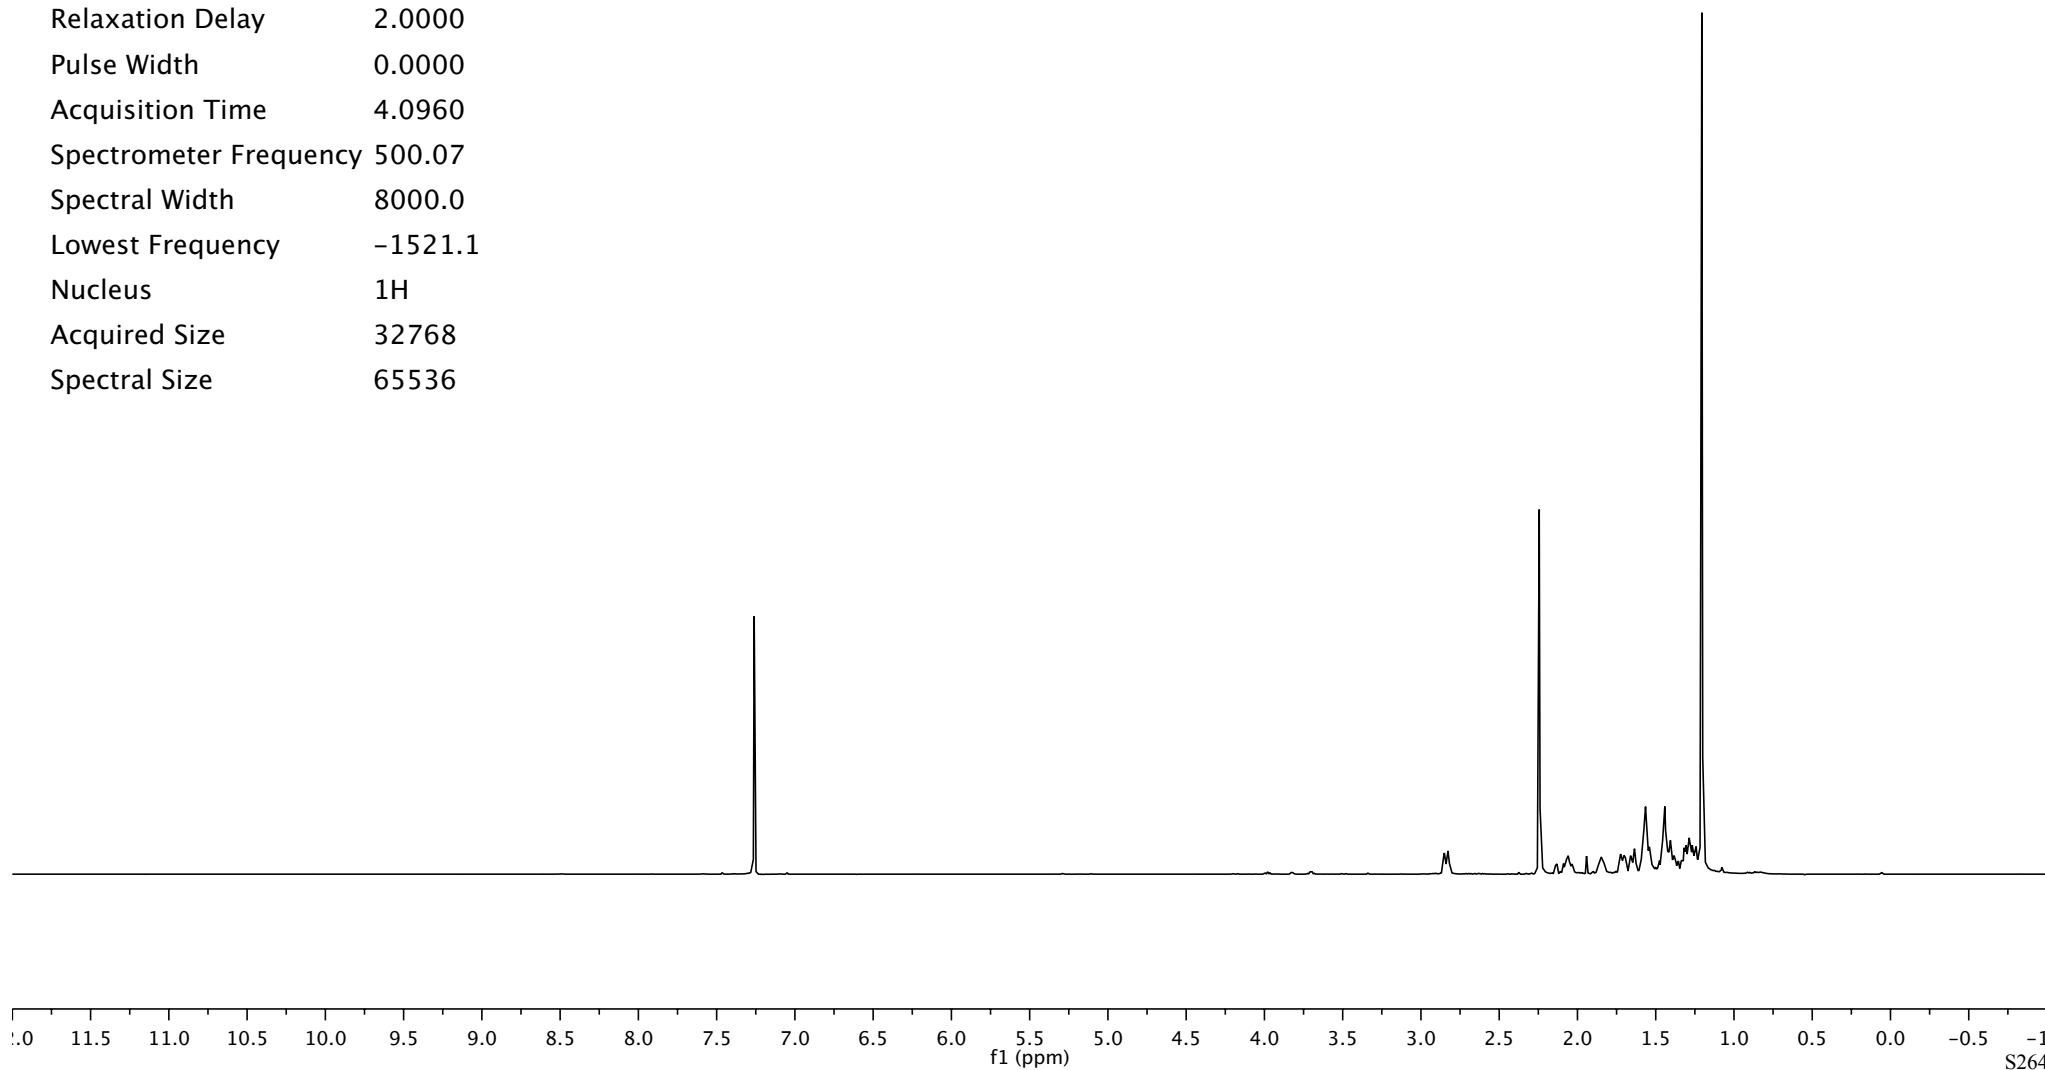

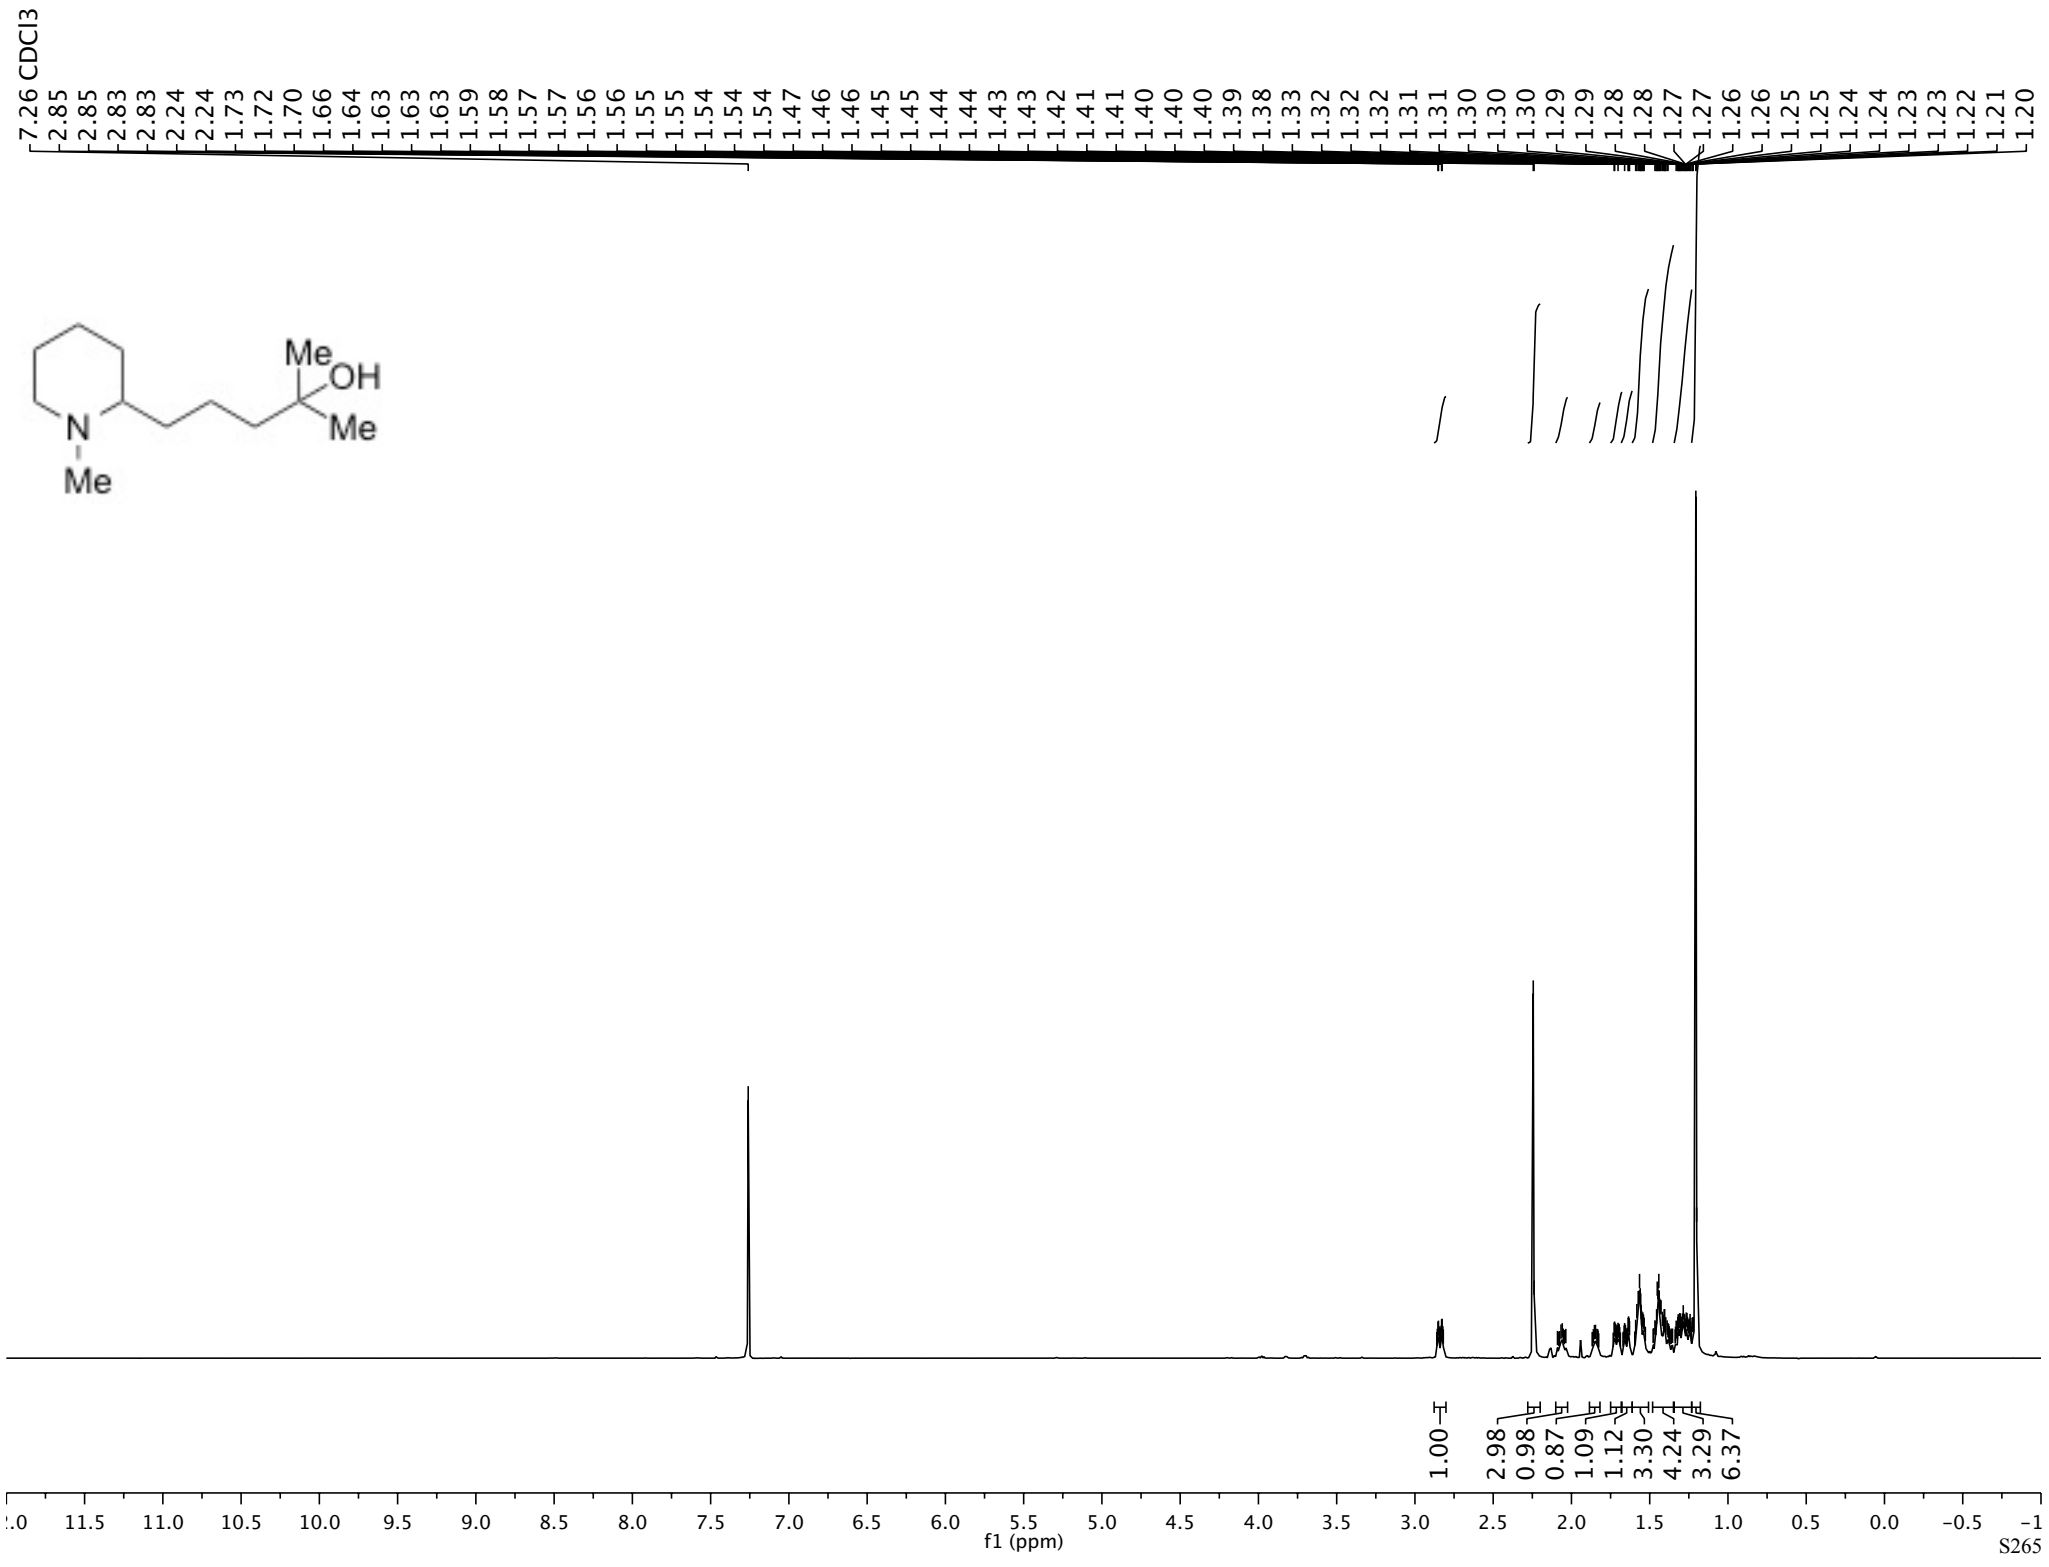

| Parameter              | Value           |
|------------------------|-----------------|
| Origin                 | Varian          |
| Spectrometer           | inova           |
| Solvent                | CDCl3           |
| Temperature            | 20.0            |
| Pulse Sequence         | s2pul           |
| Experiment             | 1D              |
| Probe                  | QUADG           |
| Number of Scans        | 653             |
| Receiver Gain          | 60              |
| Relaxation Delay       | 2.0000          |
| Pulse Width            | 0.0000          |
| Acquisition Time       | 1.0240          |
| Spectrometer Frequency | 125.60          |
| Spectral Width         | 32000.0         |
| Lowest Frequency       | -2200.9         |
| Nucleus                | <sup>13</sup> C |
| Acquired Size          | 32768           |
| Spectral Size          | 65536           |

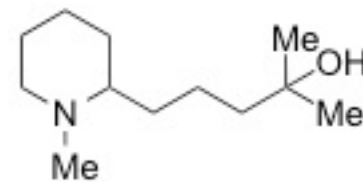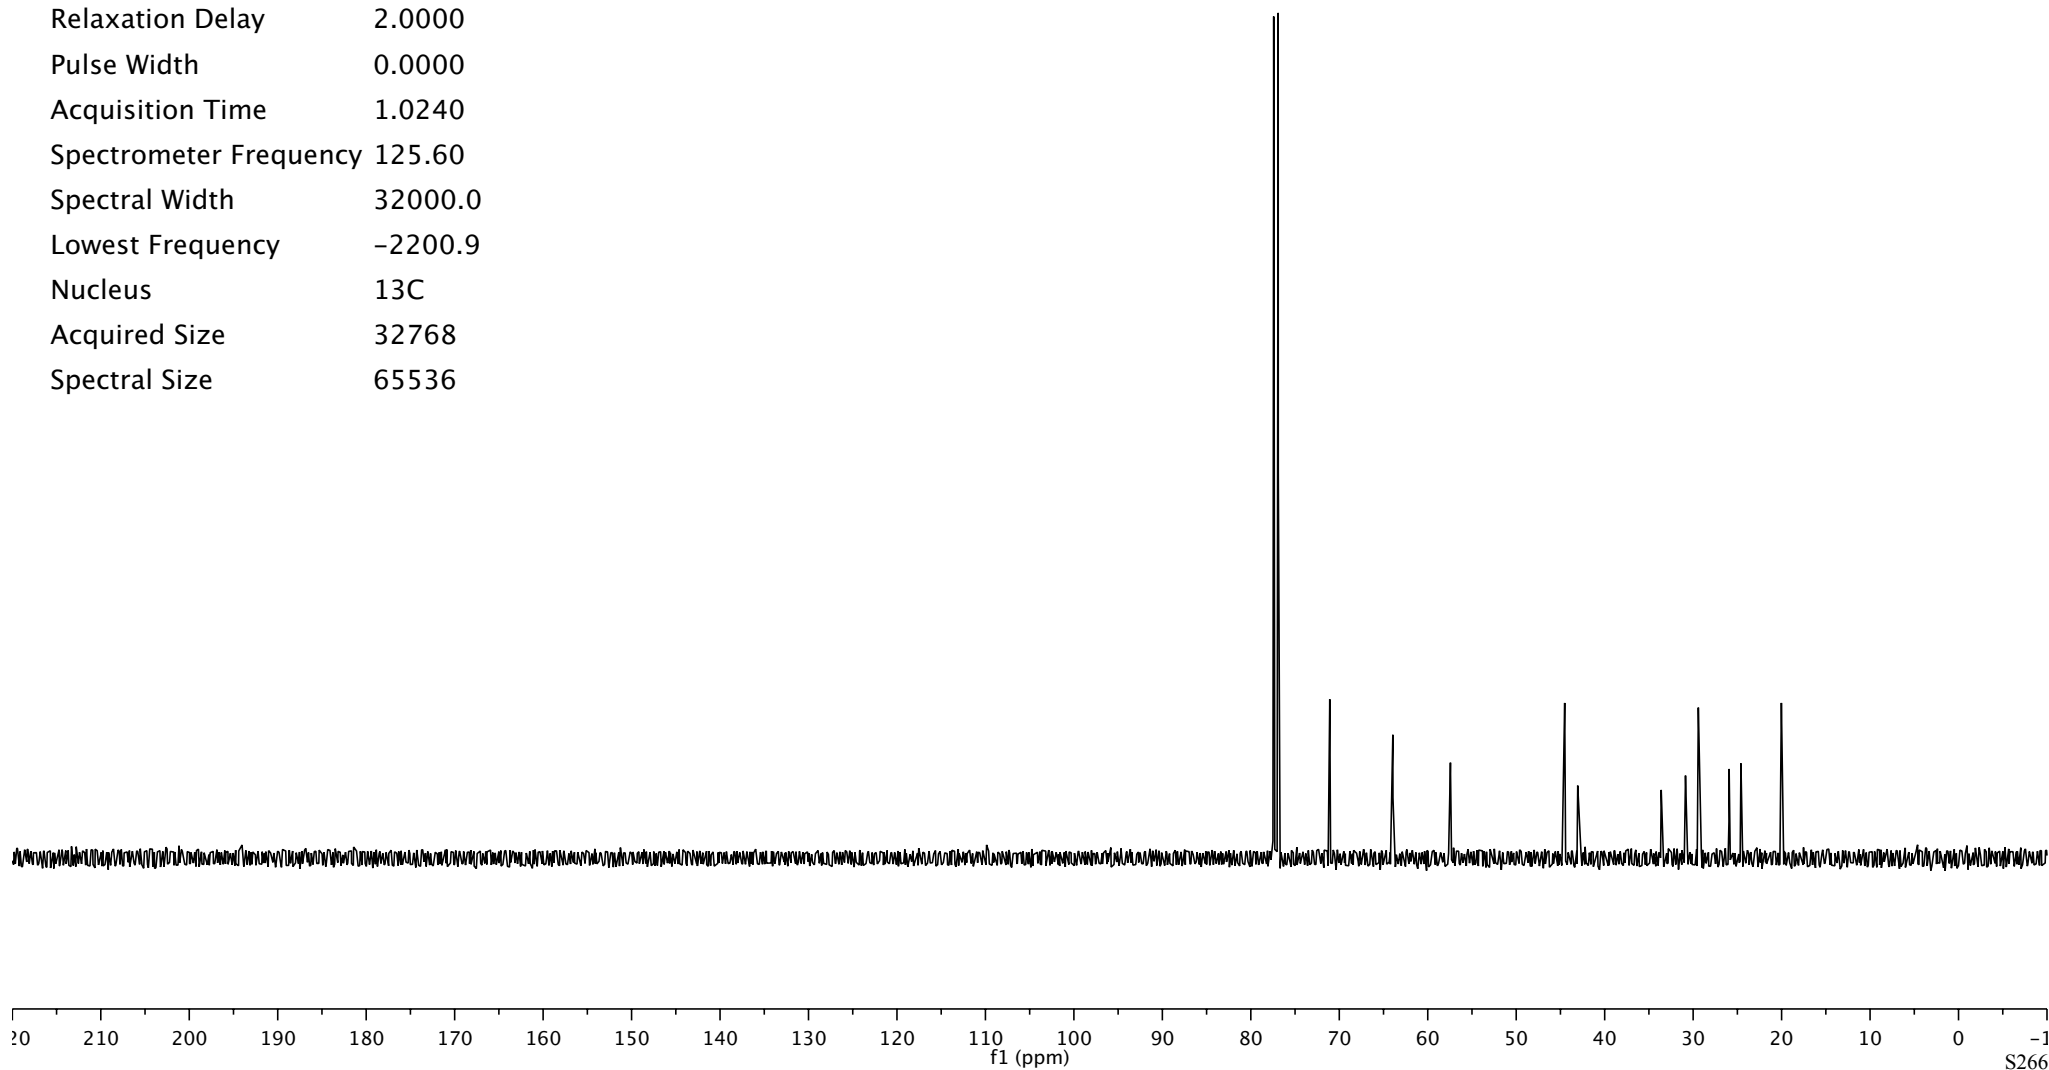

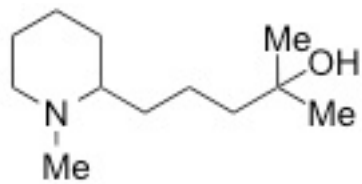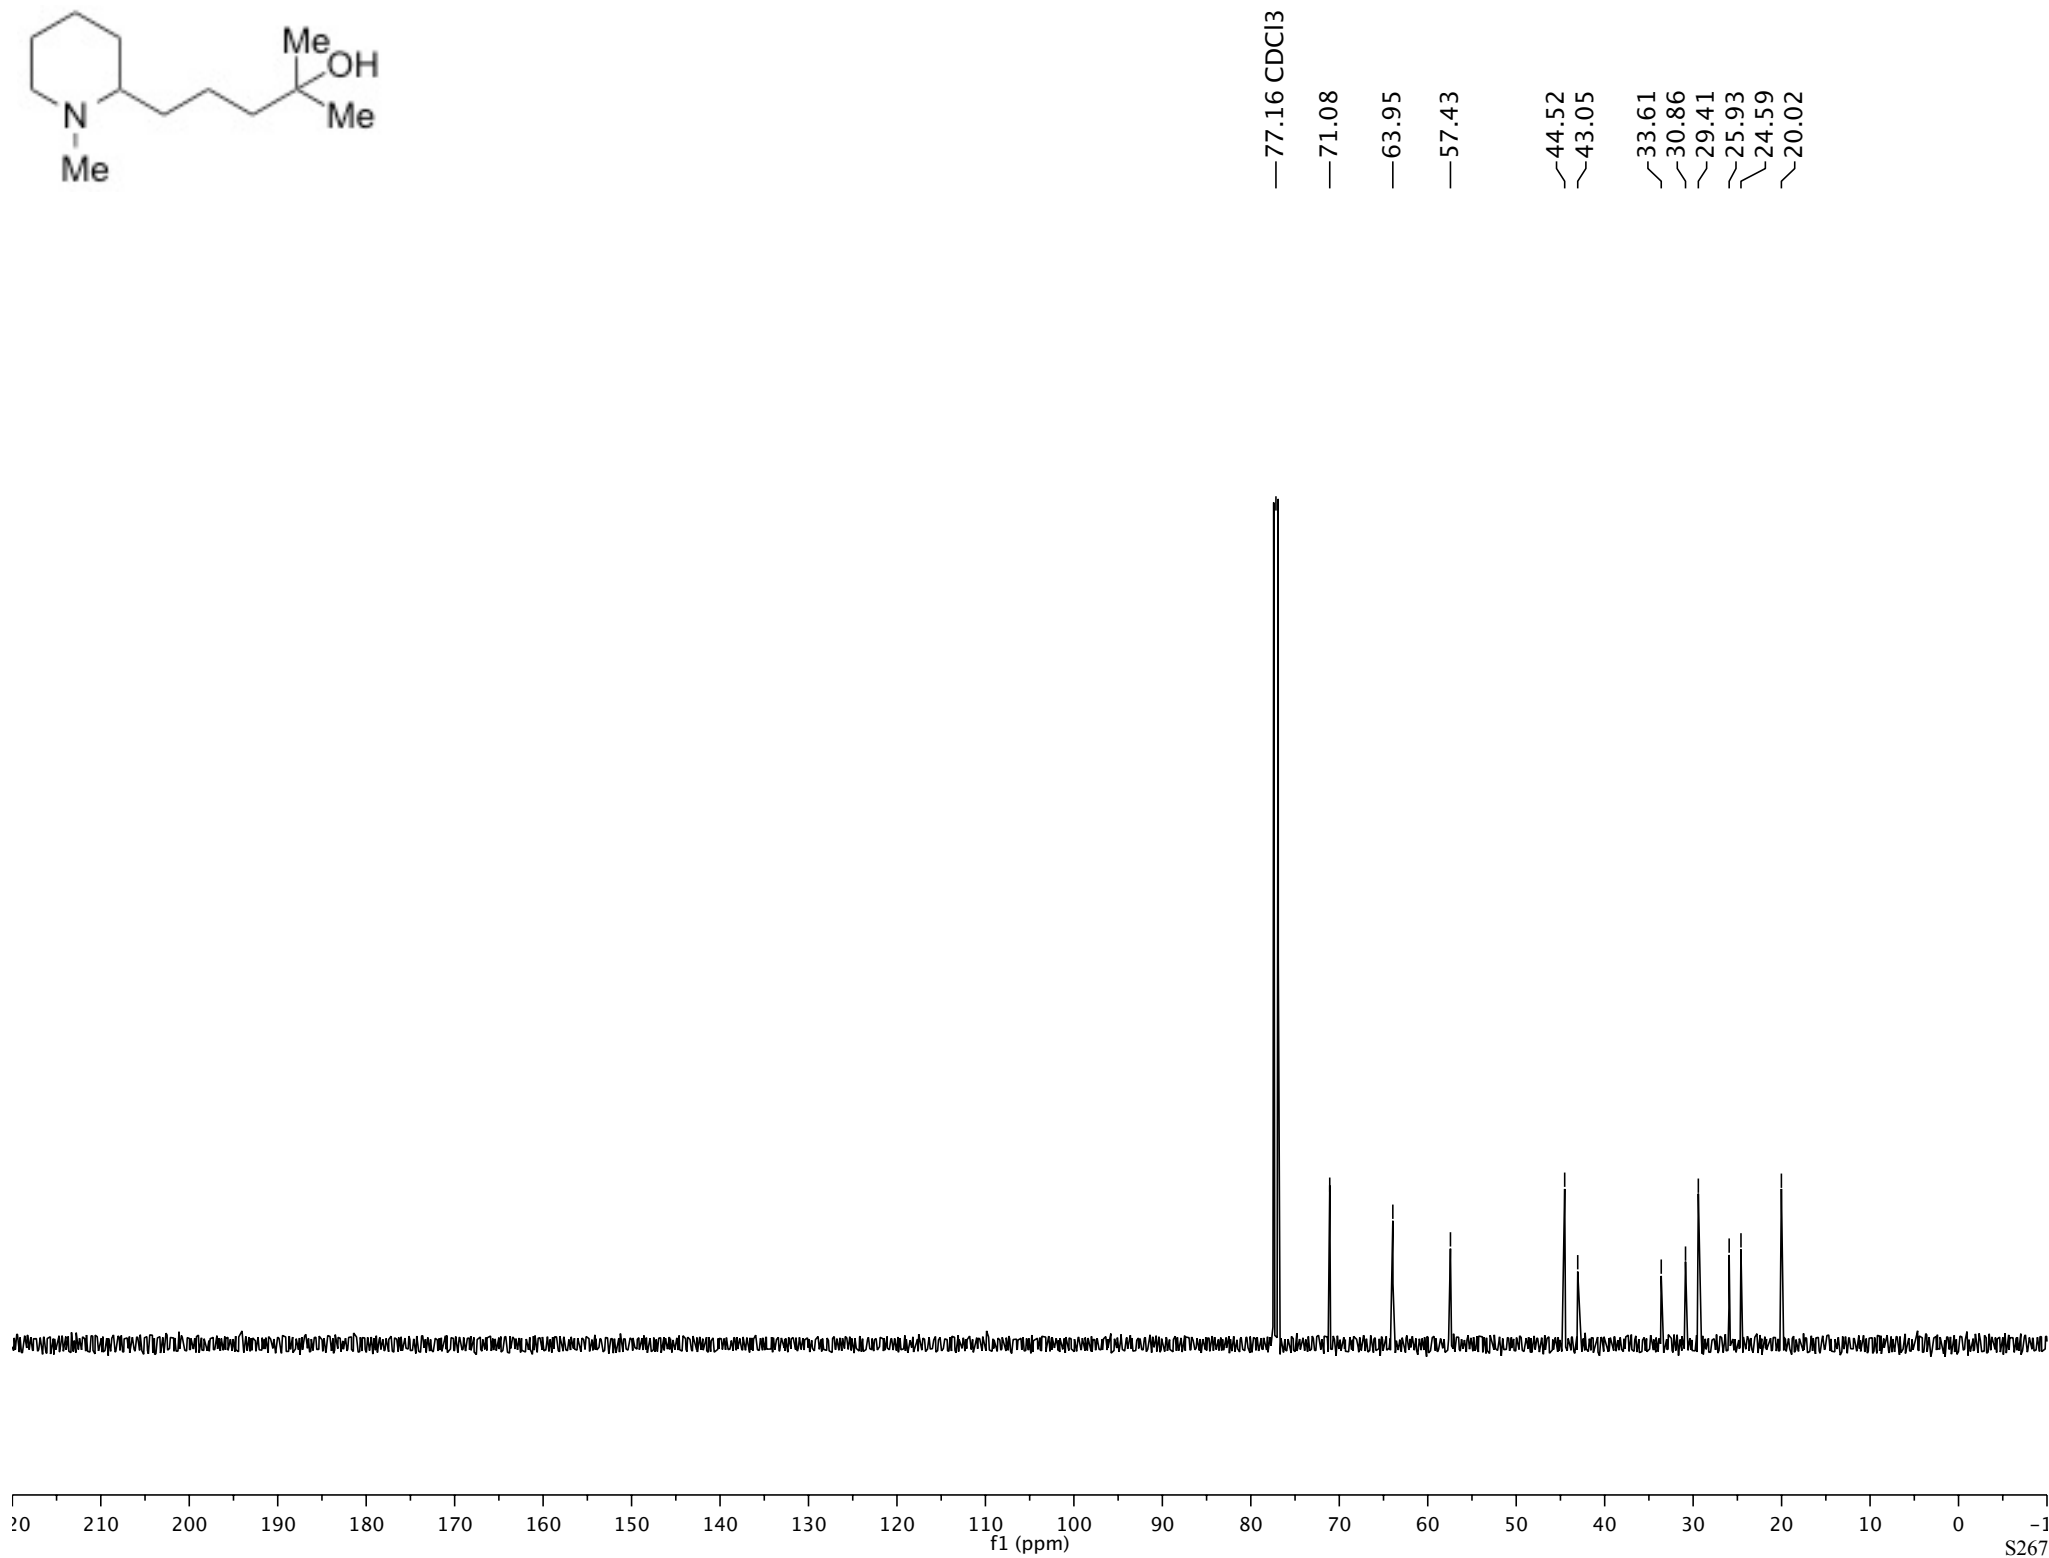

| Parameter              | Value   |
|------------------------|---------|
| Origin                 | Varian  |
| Spectrometer           | inova   |
| Solvent                | CDCl3   |
| Temperature            | 20.0    |
| Pulse Sequence         | s2pul   |
| Experiment             | 1D      |
| Probe                  | hcn     |
| Number of Scans        | 16      |
| Receiver Gain          | 34      |
| Relaxation Delay       | 2.0000  |
| Pulse Width            | 0.0000  |
| Acquisition Time       | 4.0960  |
| Spectrometer Frequency | 500.07  |
| Spectral Width         | 8000.0  |
| Lowest Frequency       | -1521.1 |
| Nucleus                | 1H      |
| Acquired Size          | 32768   |
| Spectral Size          | 65536   |

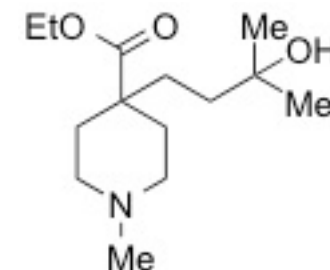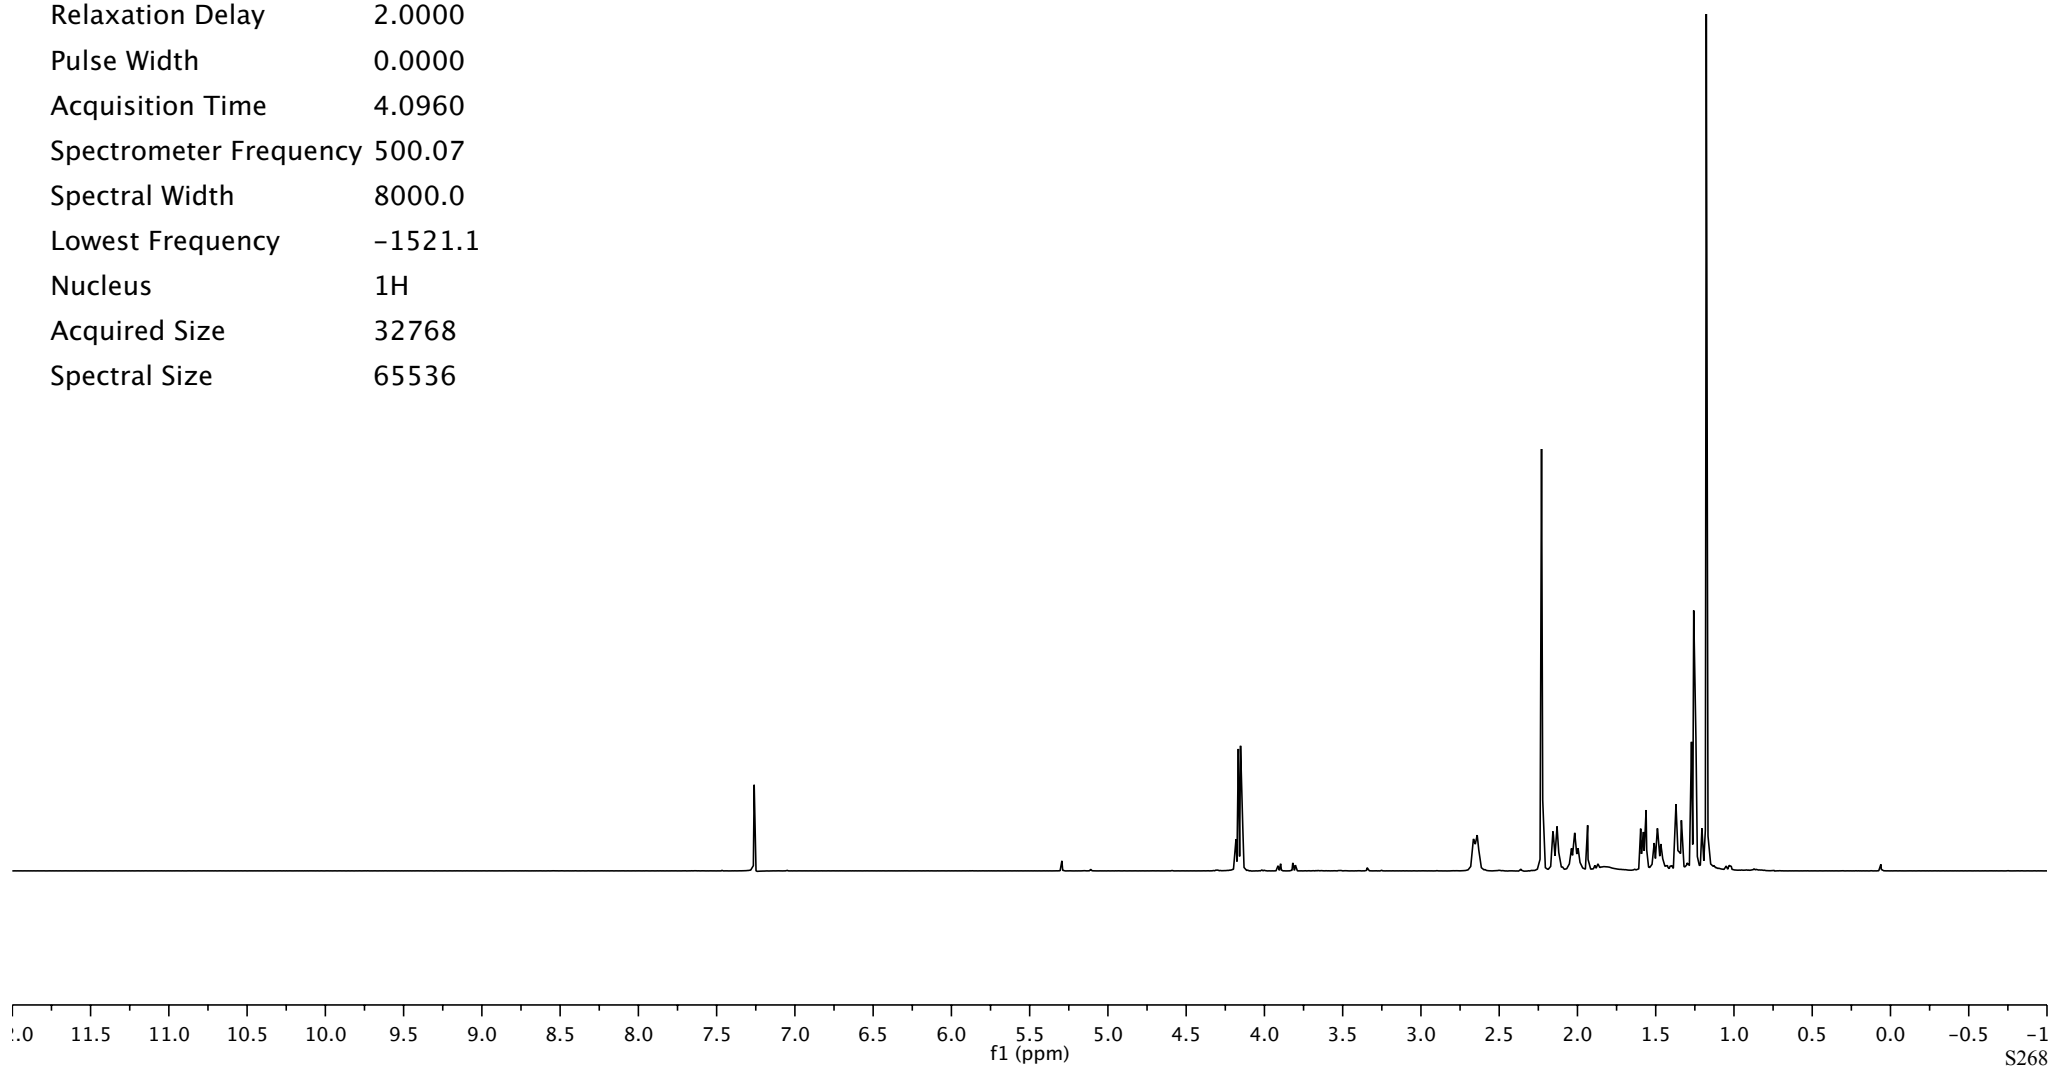

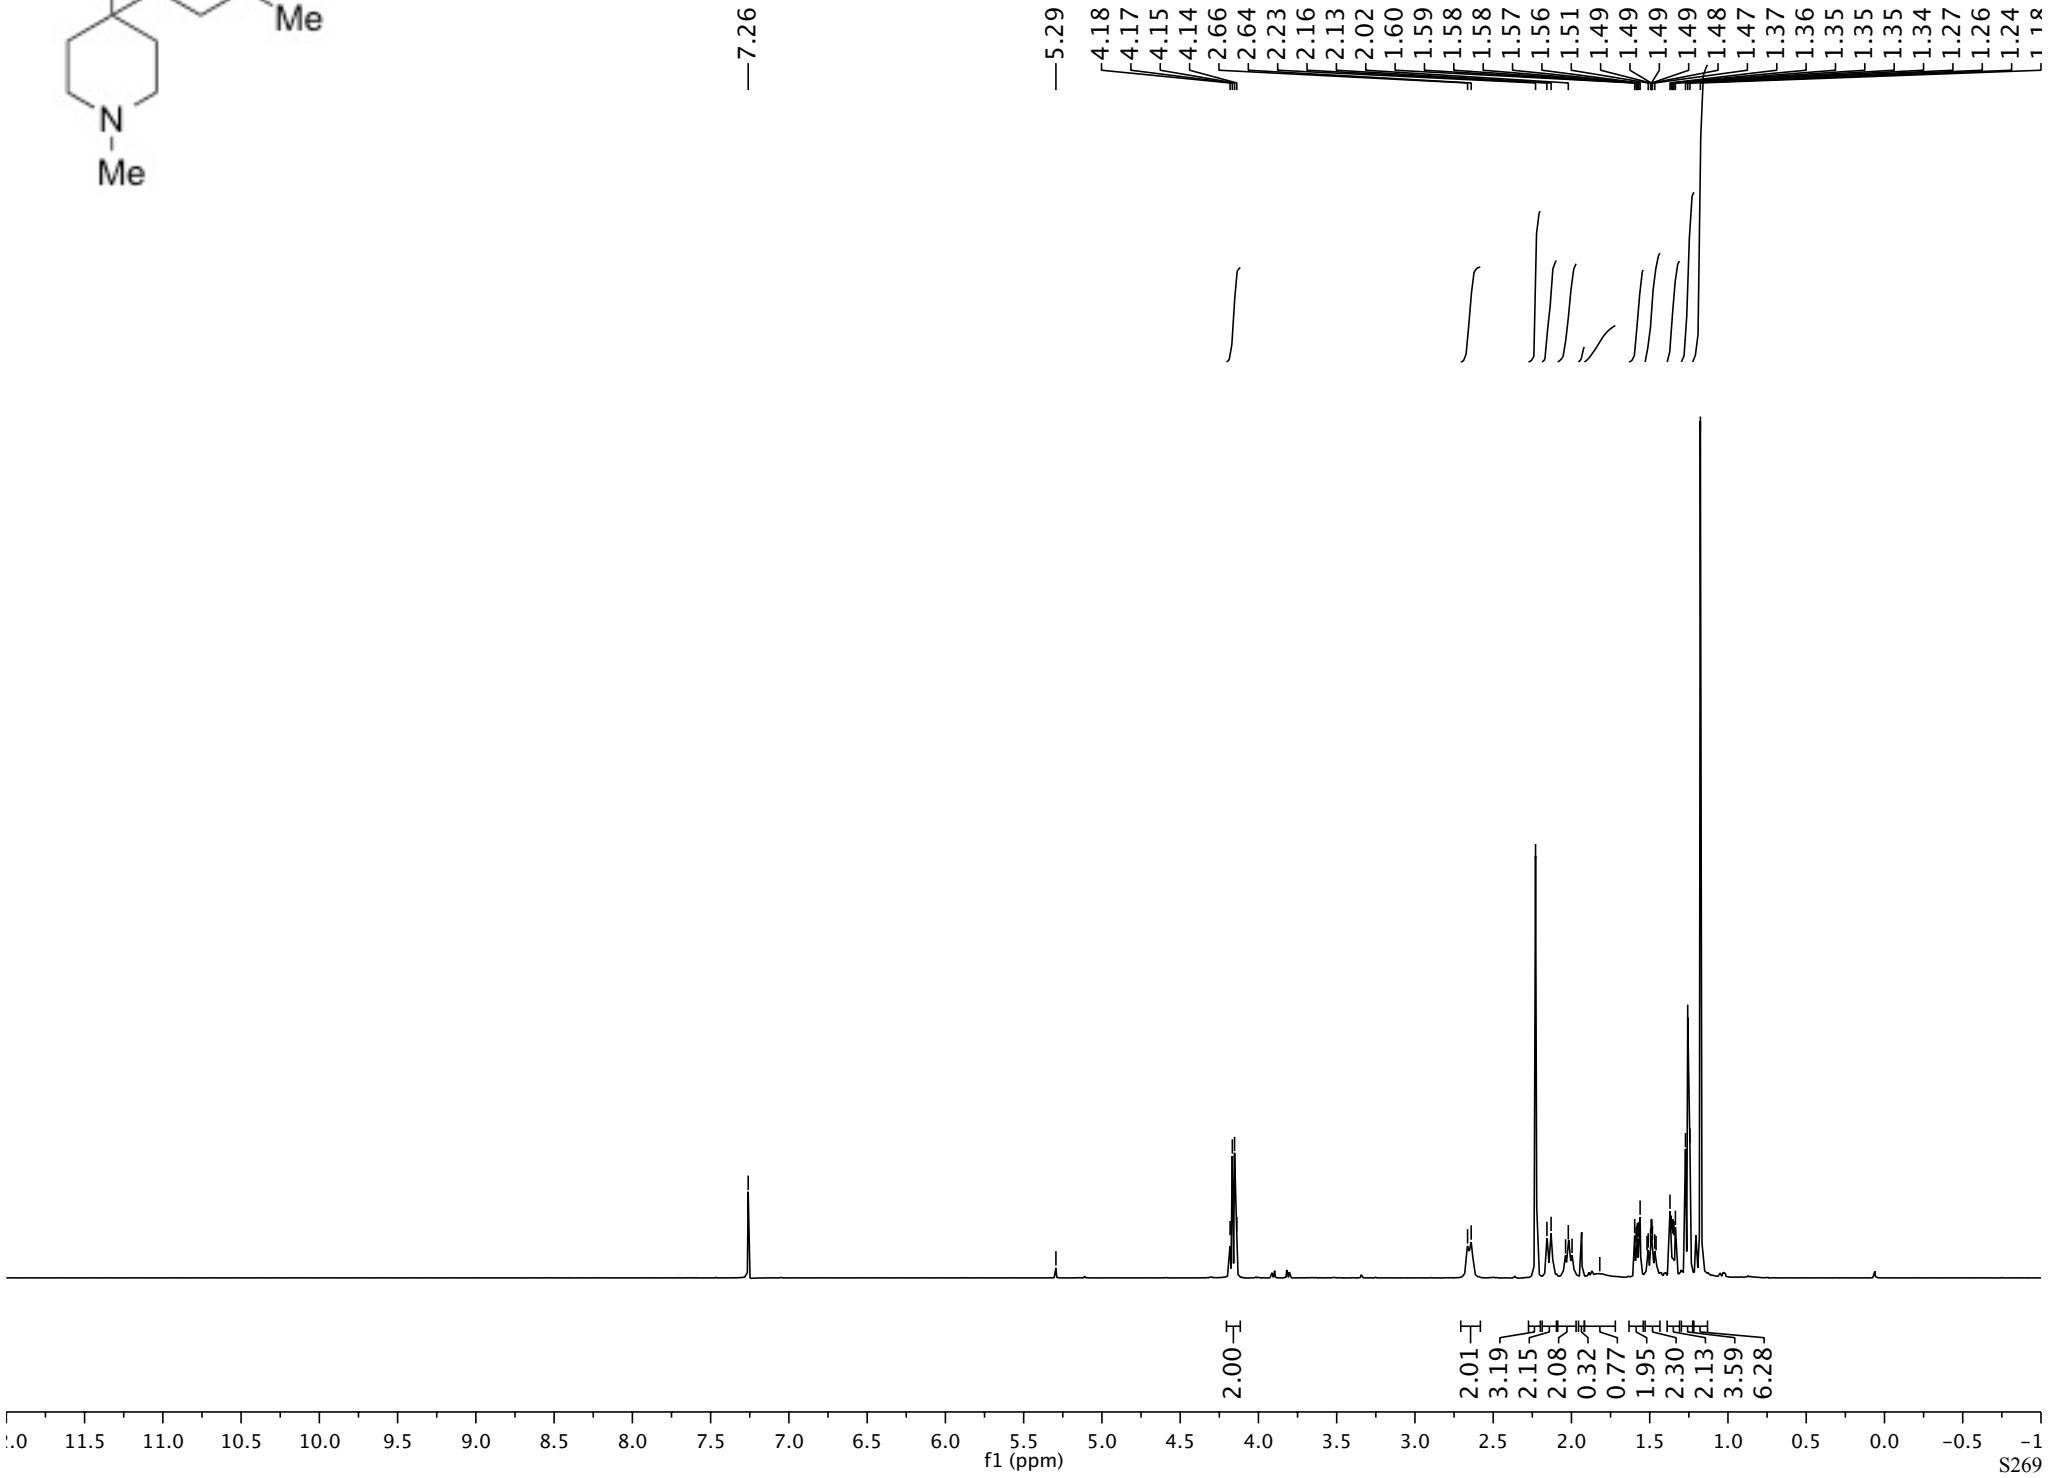

—5.29

2.01  
3.19  
2.15  
2.08  
0.32  
0.77  
1.95  
2.30  
2.13  
3.59  
6.28

| Parameter              | Value           |
|------------------------|-----------------|
| Origin                 | Varian          |
| Spectrometer           | inova           |
| Solvent                | CDCl3           |
| Temperature            | 20.0            |
| Pulse Sequence         | s2pul           |
| Experiment             | 1D              |
| Probe                  | QUAD            |
| Number of Scans        | 2373            |
| Receiver Gain          | 60              |
| Relaxation Delay       | 2.0000          |
| Pulse Width            | 0.0000          |
| Acquisition Time       | 1.0863          |
| Spectrometer Frequency | 125.66          |
| Spectral Width         | 30165.9         |
| Lowest Frequency       | -1272.6         |
| Nucleus                | <sup>13</sup> C |
| Acquired Size          | 32768           |
| Spectral Size          | 65536           |

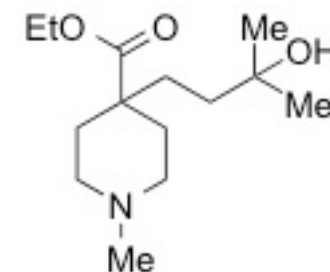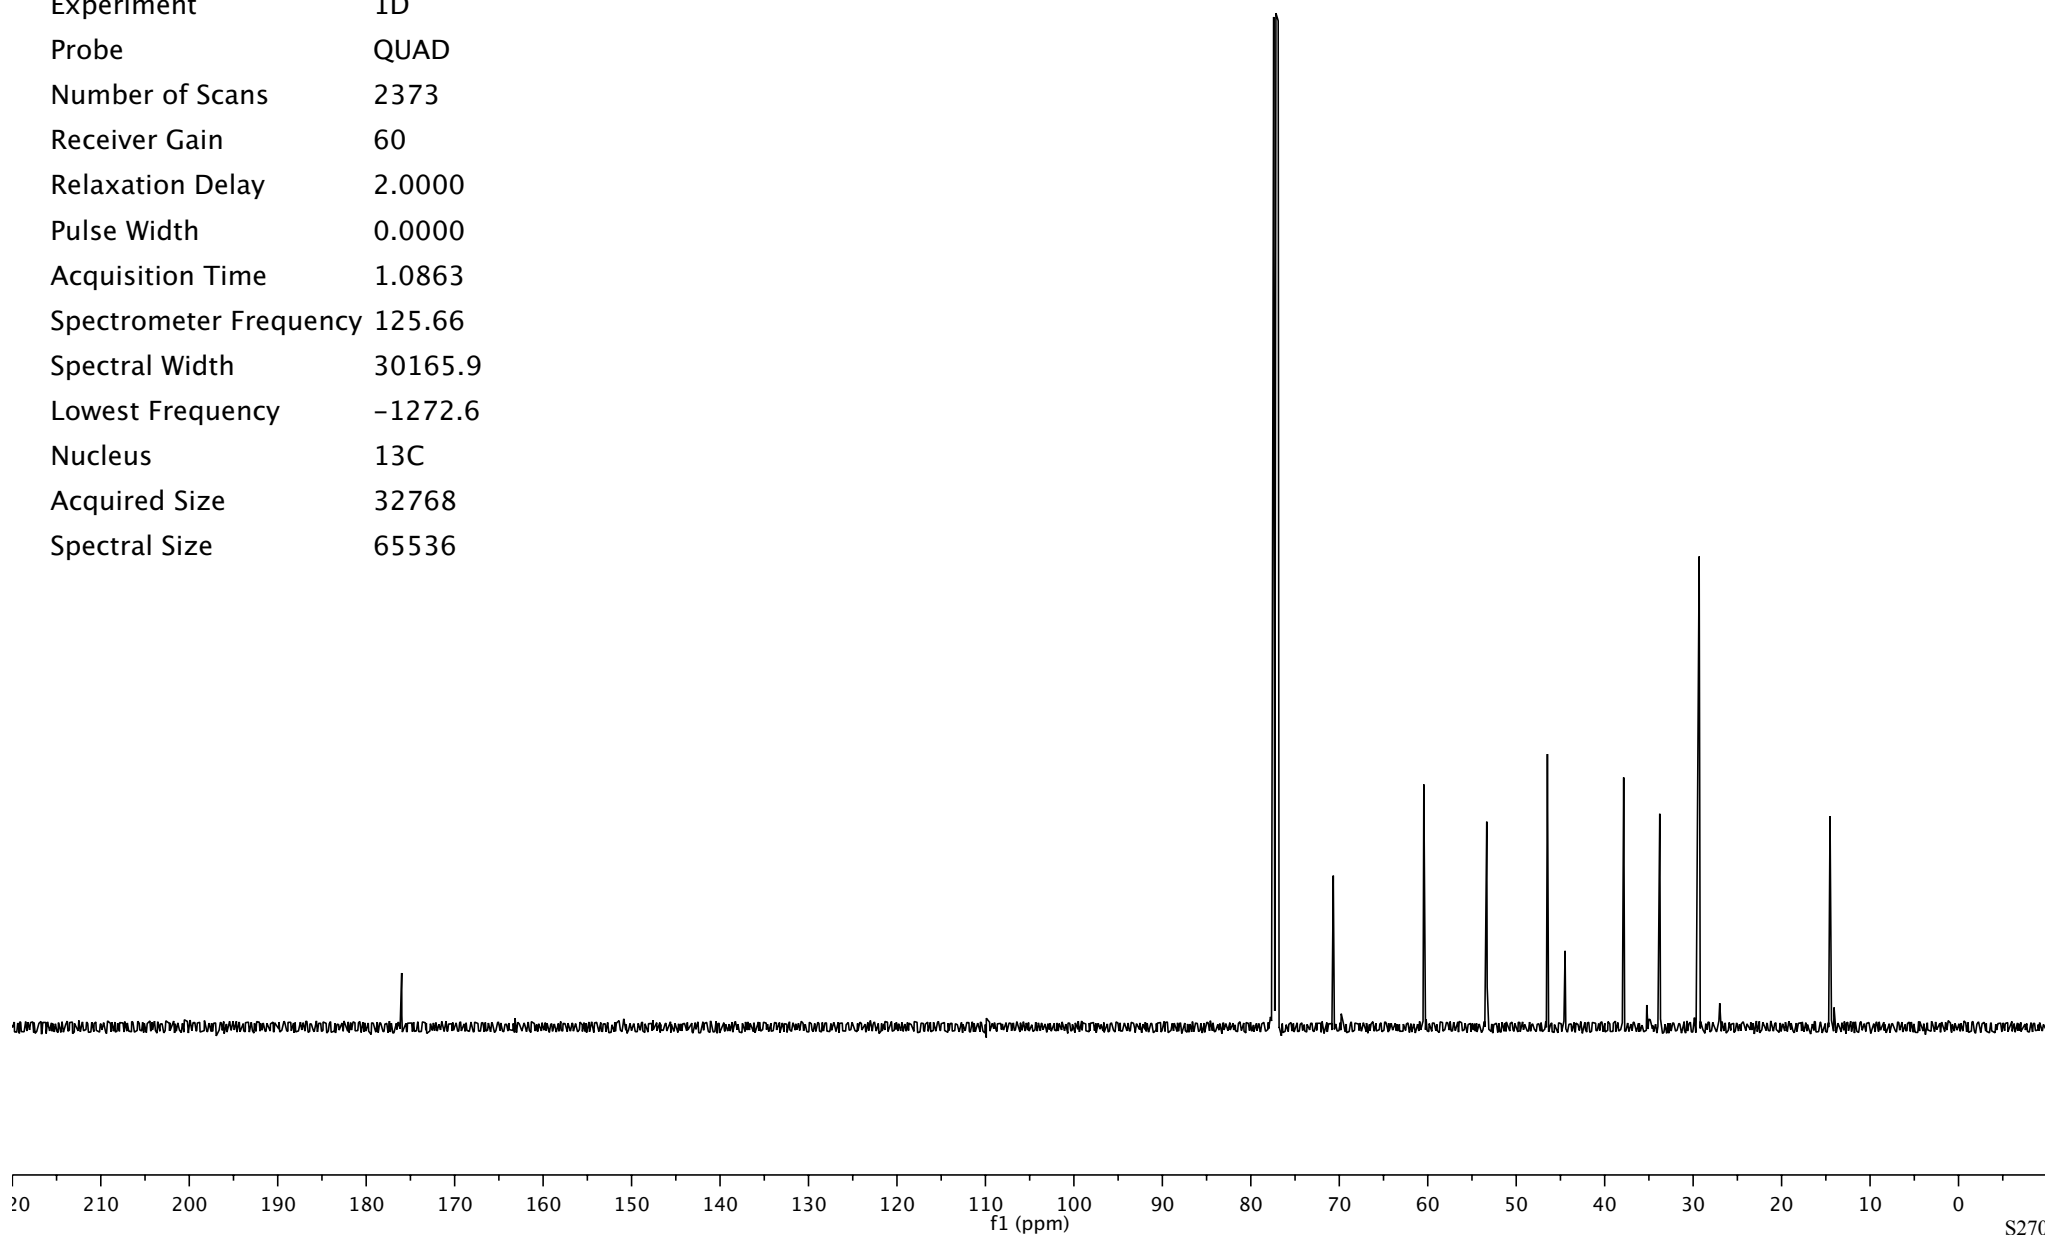

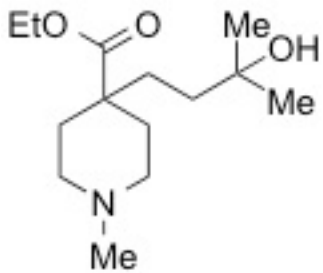

—175.99

—77.16 CDCl<sub>3</sub>

—70.68

—60.44

—53.33

—46.47

—44.48

—37.85

—35.24

—33.78

—29.32

—14.53

20 210 200 190 180 170 160 150 140 130 120 110 100 90 80 70 60 50 40 30 20 10 0 -1  
f1 (ppm) S271



| Parameter              | Value          |
|------------------------|----------------|
| Origin                 | Varian         |
| Spectrometer           | inova          |
| Solvent                | CDCl3          |
| Temperature            | 20.0           |
| Pulse Sequence         | s2pul          |
| Experiment             | 1D             |
| Probe                  | hcn            |
| Number of Scans        | 16             |
| Receiver Gain          | 32             |
| Relaxation Delay       | 2.0000         |
| Pulse Width            | 0.0000         |
| Acquisition Time       | 4.0960         |
| Spectrometer Frequency | 500.07         |
| Spectral Width         | 8000.0         |
| Lowest Frequency       | -1521.1        |
| Nucleus                | <sup>1</sup> H |
| Acquired Size          | 32768          |
| Spectral Size          | 65536          |

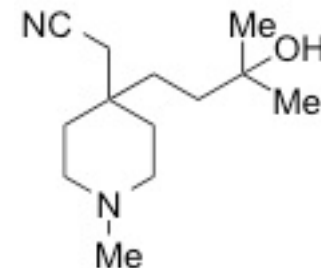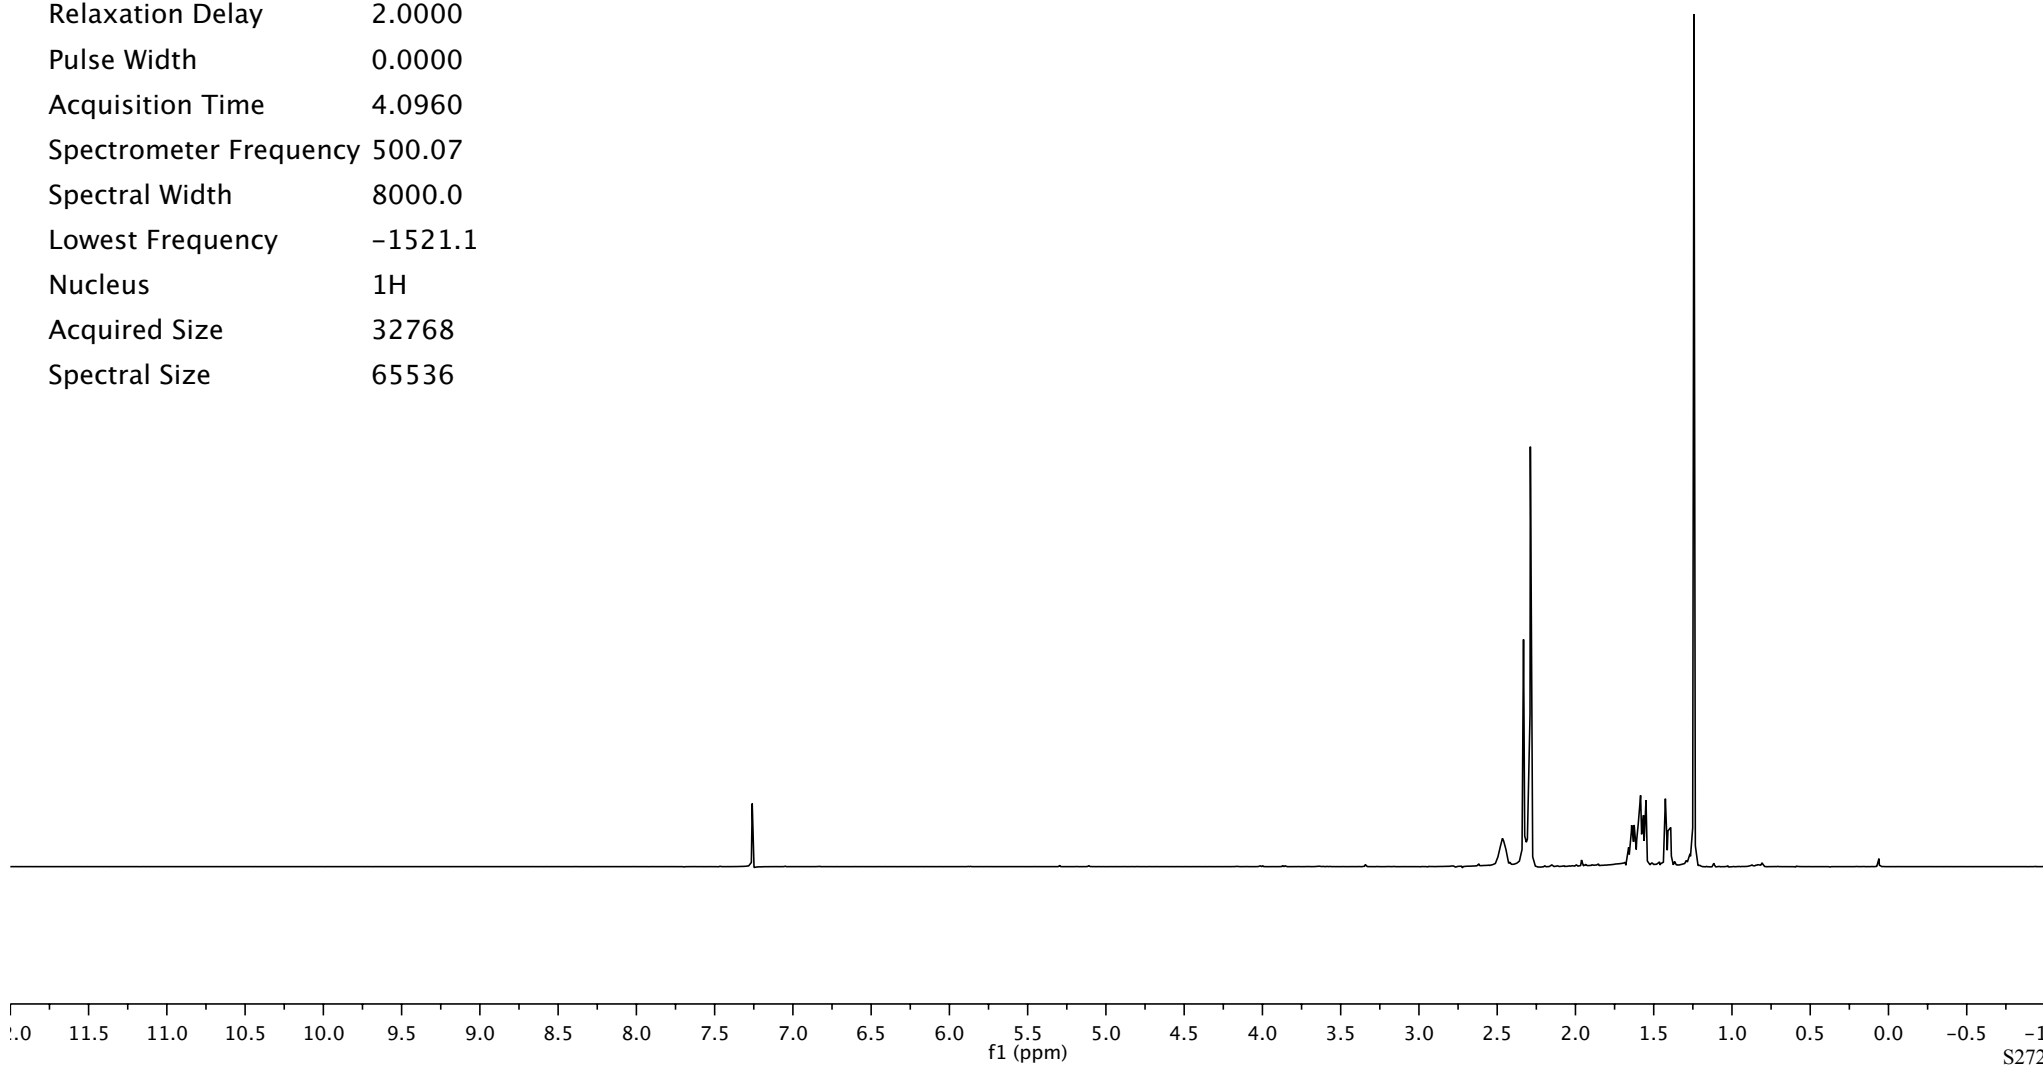



| Parameter              | Value           |
|------------------------|-----------------|
| Origin                 | Varian          |
| Spectrometer           | inova           |
| Solvent                | CDCl3           |
| Temperature            | 20.0            |
| Pulse Sequence         | s2pul           |
| Experiment             | 1D              |
| Probe                  | QUAD            |
| Number of Scans        | 662             |
| Receiver Gain          | 60              |
| Relaxation Delay       | 2.0000          |
| Pulse Width            | 0.0000          |
| Acquisition Time       | 1.0863          |
| Spectrometer Frequency | 125.66          |
| Spectral Width         | 30165.9         |
| Lowest Frequency       | -1273.1         |
| Nucleus                | <sup>13</sup> C |
| Acquired Size          | 32768           |
| Spectral Size          | 65536           |

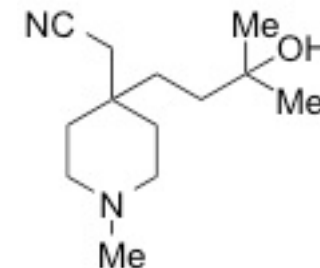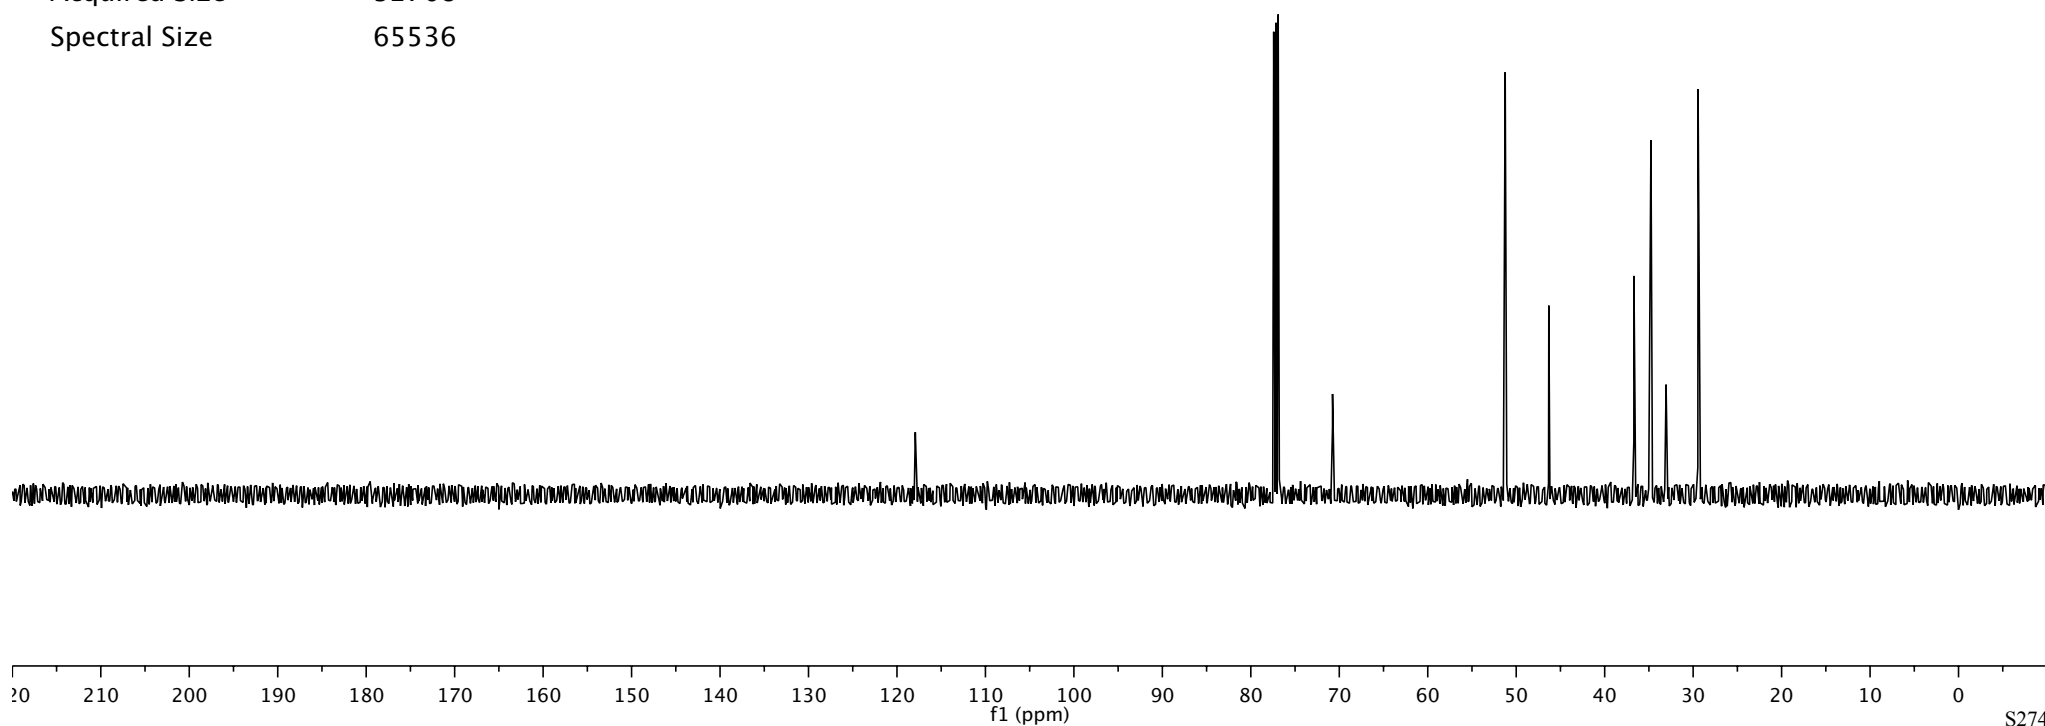

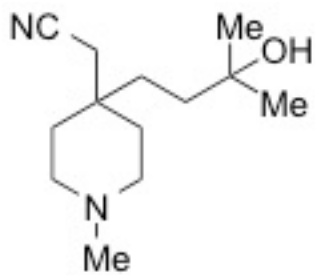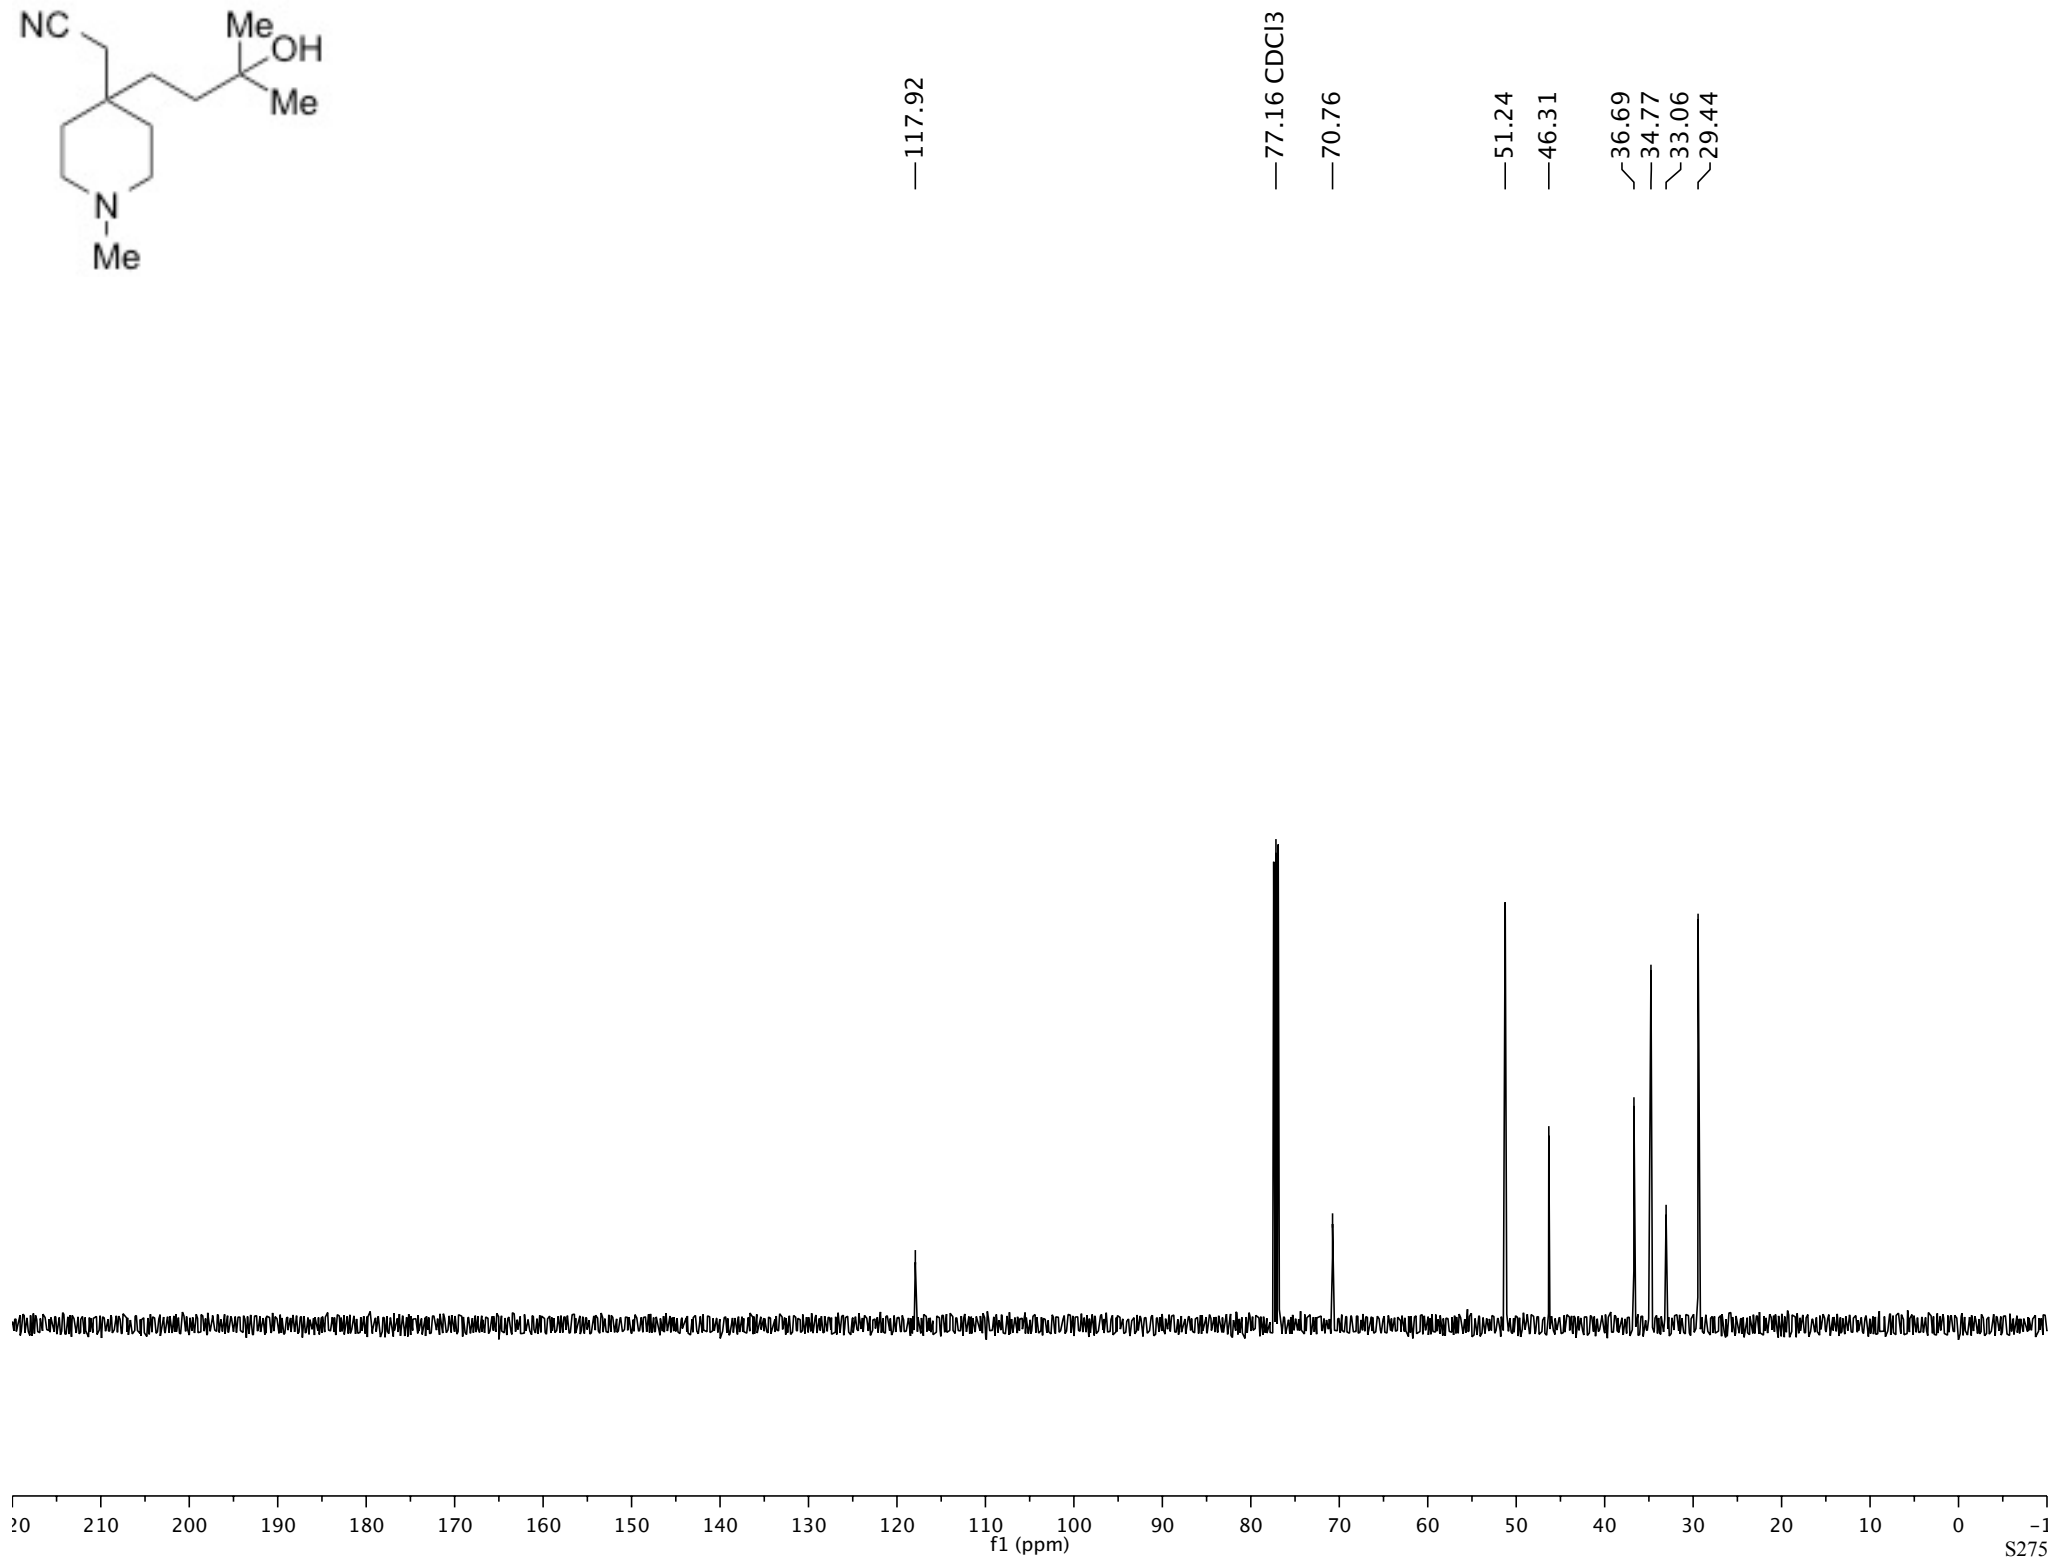

| Parameter              | Value          |
|------------------------|----------------|
| Origin                 | Varian         |
| Spectrometer           | inova          |
| Solvent                | CDCl3          |
| Temperature            | 25.0           |
| Pulse Sequence         | s2pul          |
| Experiment             | 1D             |
| Probe                  | QUAD           |
| Receiver Gain          | 41             |
| Relaxation Delay       | 10.0000        |
| Pulse Width            | 0.0000         |
| Acquisition Time       | 4.6645         |
| Spectrometer Frequency | 499.69         |
| Spectral Width         | 7024.9         |
| Lowest Frequency       | -1021.8        |
| Nucleus                | <sup>1</sup> H |
| Acquired Size          | 32768          |
| Spectral Size          | 65536          |

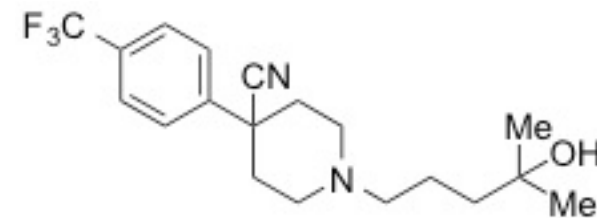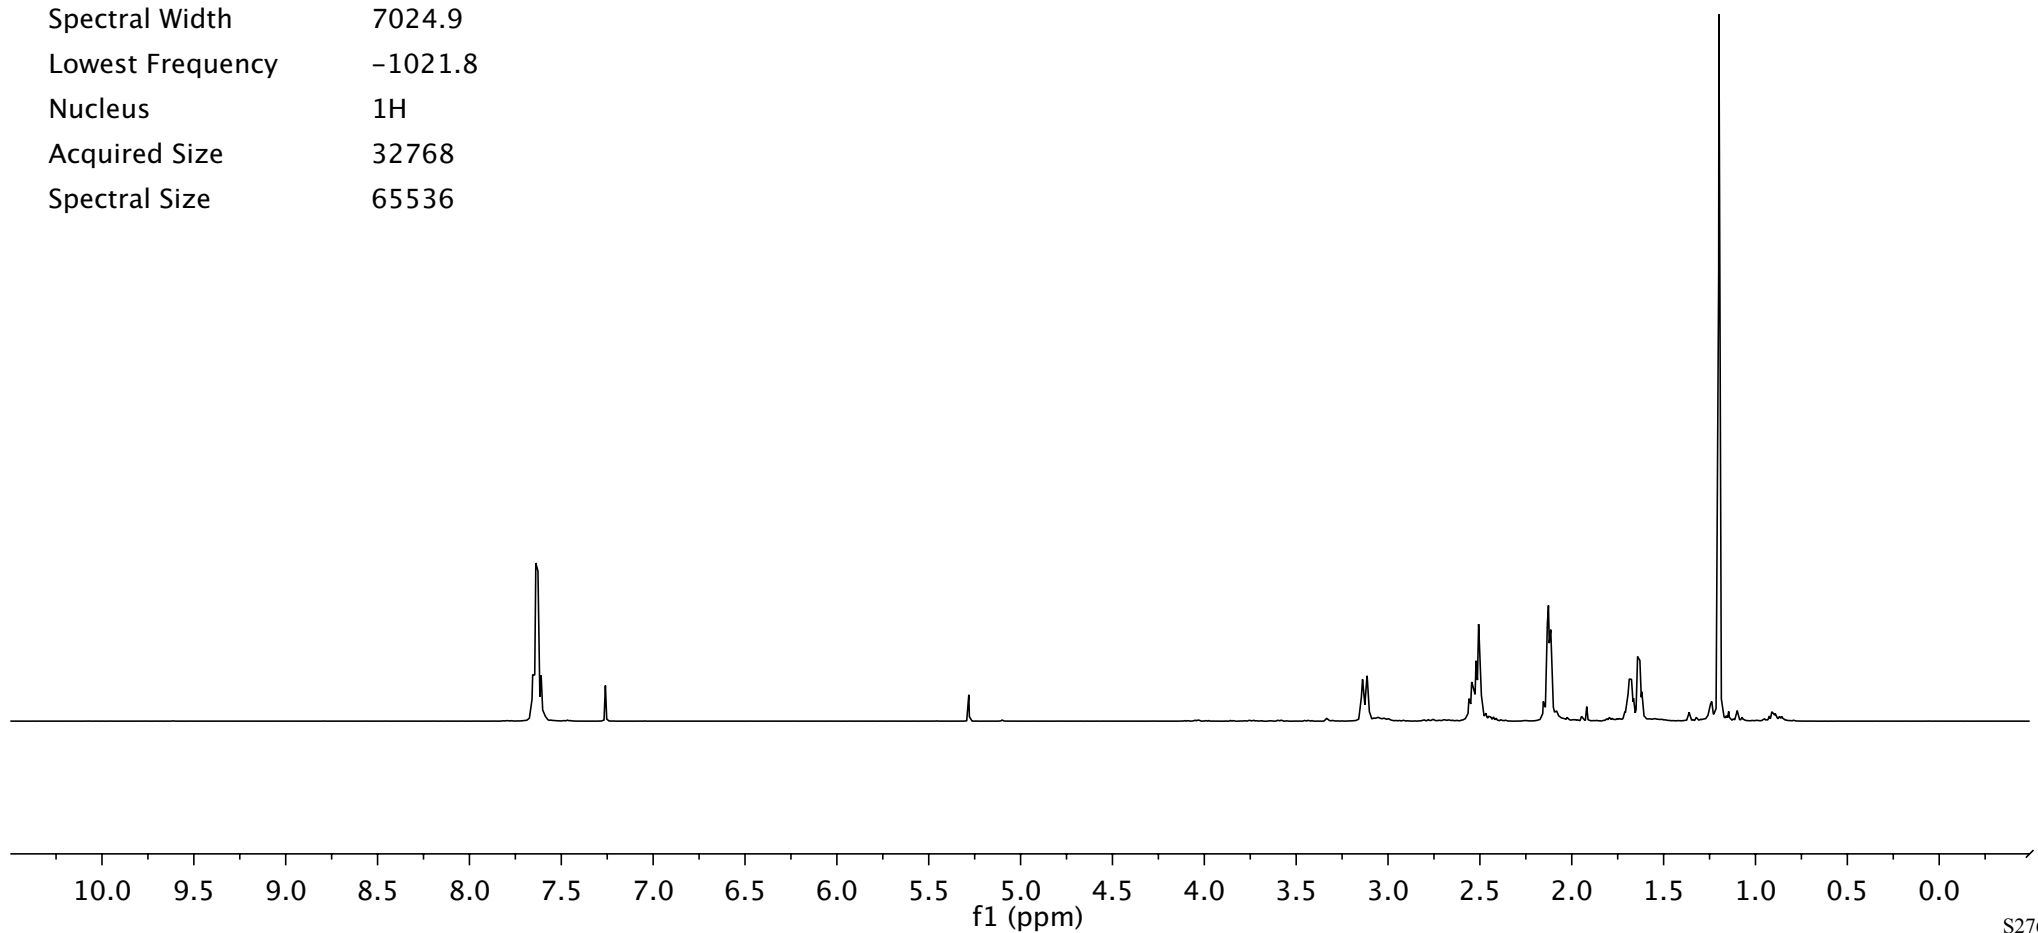

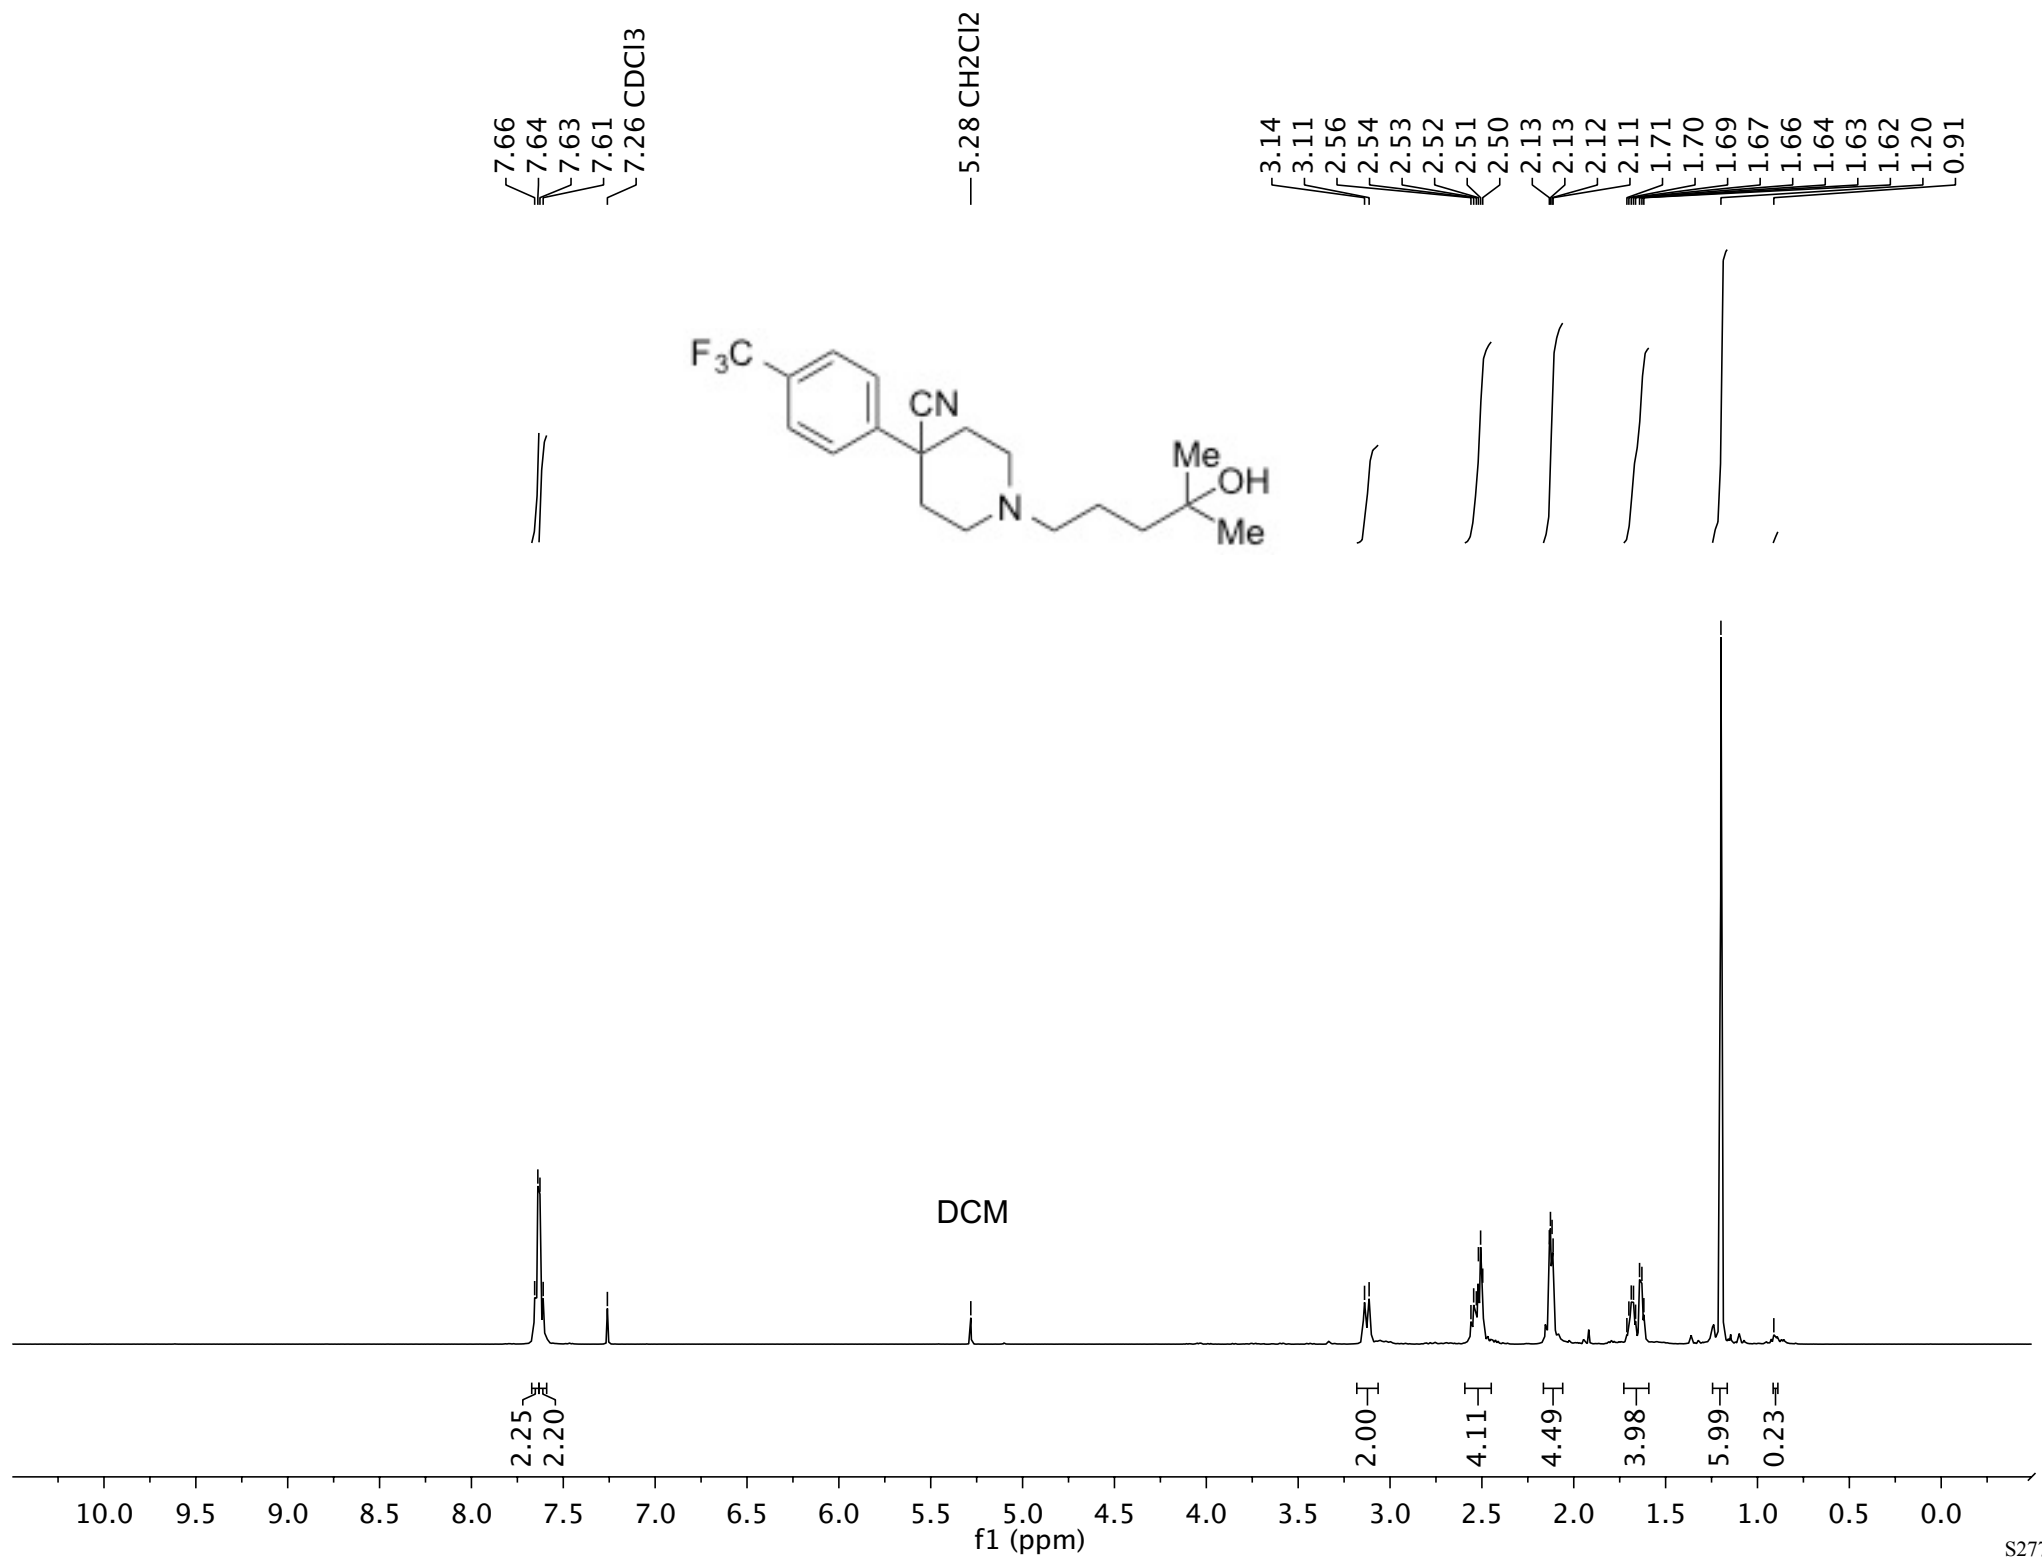

| Parameter              | Value             |
|------------------------|-------------------|
| Origin                 | Varian            |
| Spectrometer           | inova             |
| Solvent                | CDCl <sub>3</sub> |
| Temperature            | 20.0              |
| Pulse Sequence         | s2pul             |
| Experiment             | 1D                |
| Probe                  | QUADG             |
| Receiver Gain          | 60                |
| Relaxation Delay       | 1.0000            |
| Pulse Width            | 0.0000            |
| Acquisition Time       | 1.0240            |
| Spectrometer Frequency | 125.60            |
| Spectral Width         | 32000.0           |
| Lowest Frequency       | -2205.2           |
| Nucleus                | <sup>13</sup> C   |
| Acquired Size          | 32768             |
| Spectral Size          | 65536             |

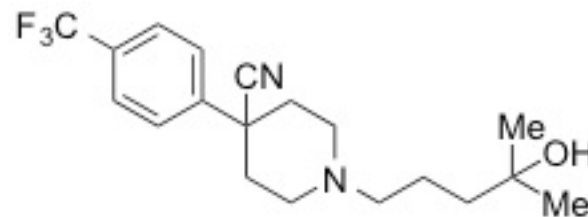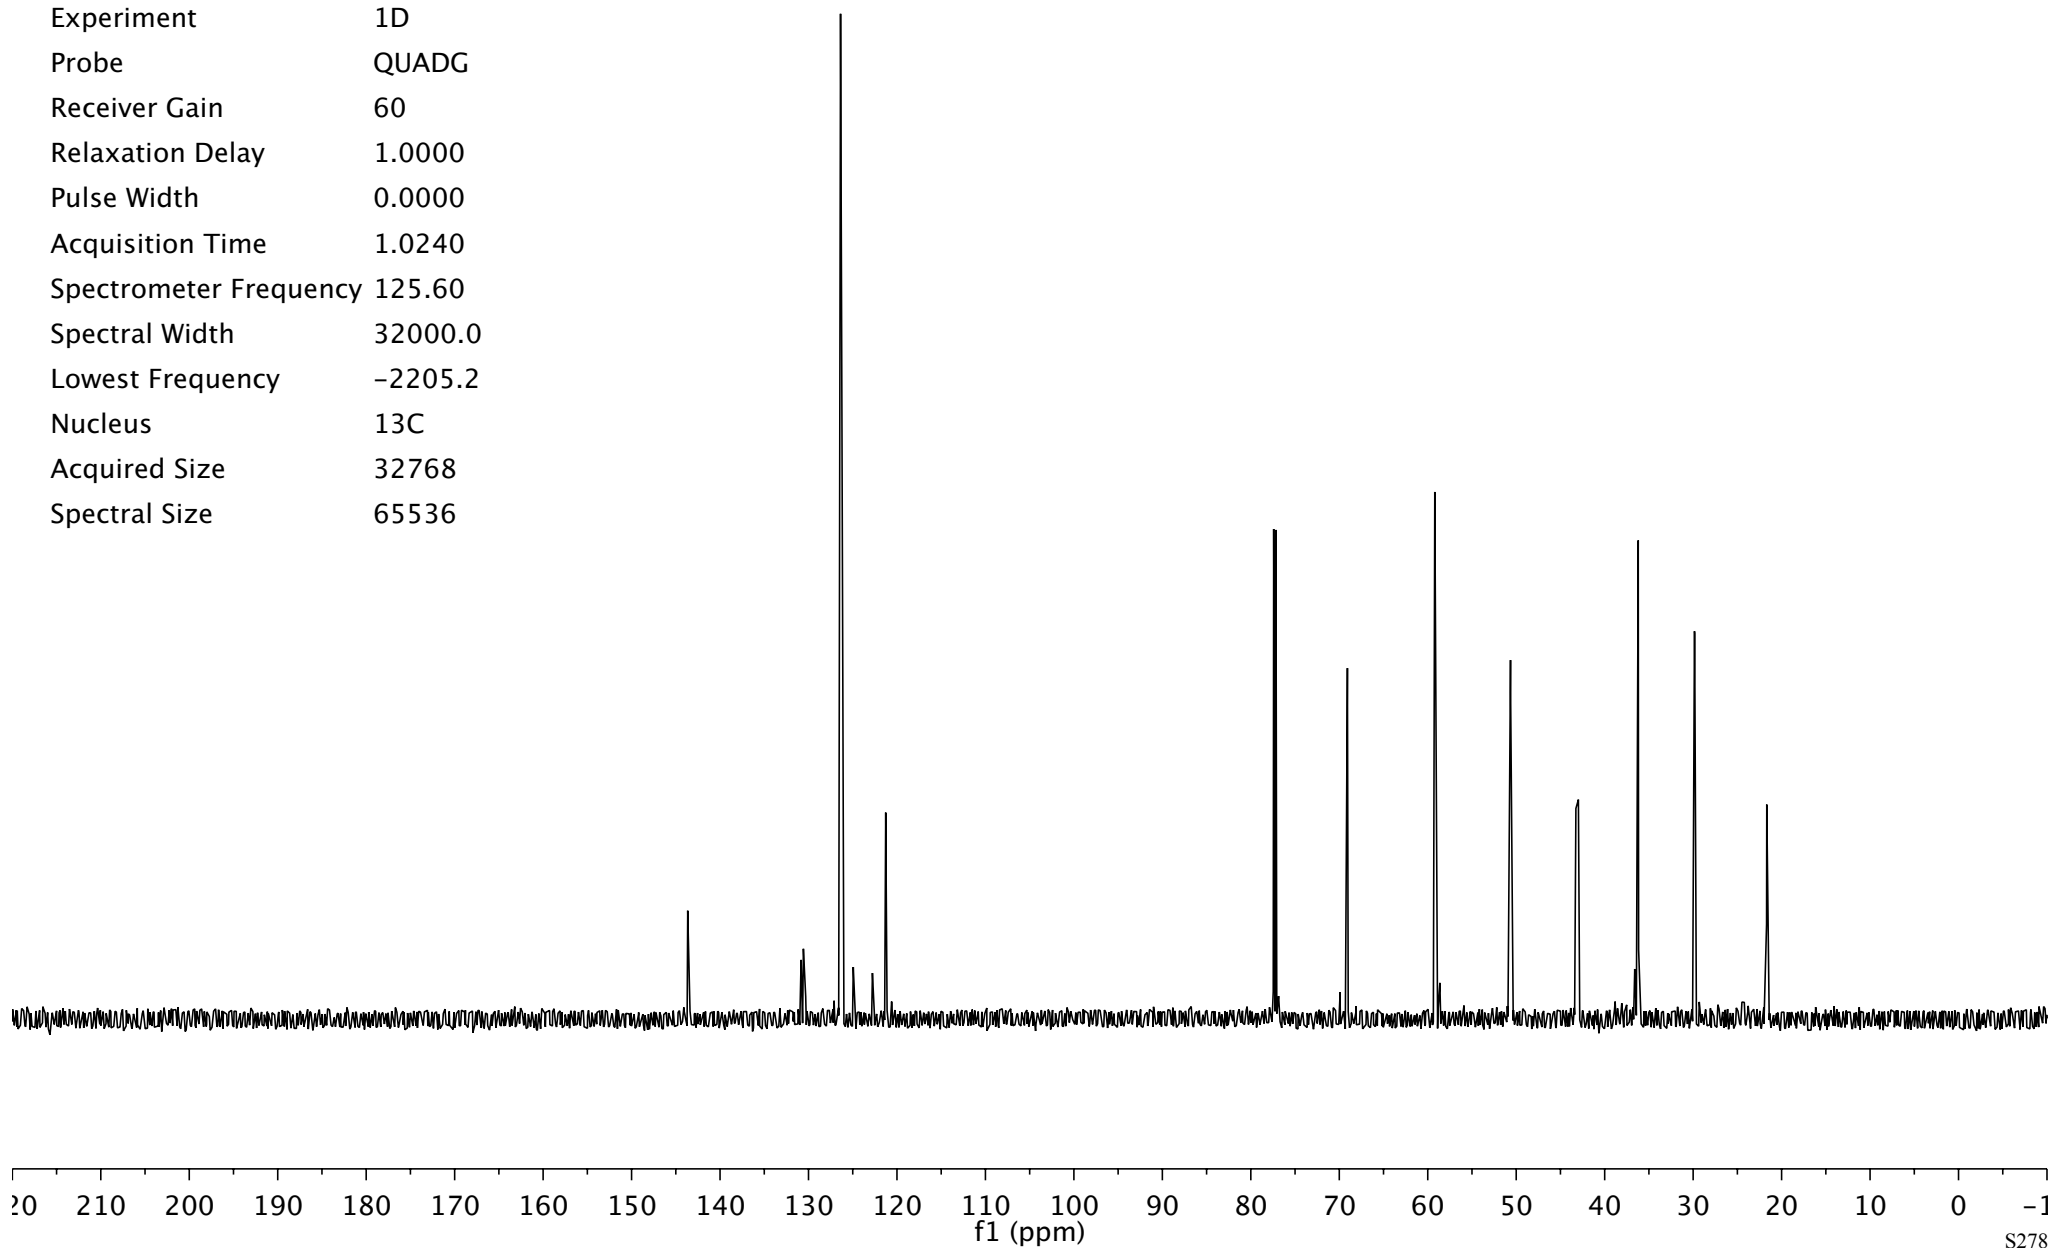

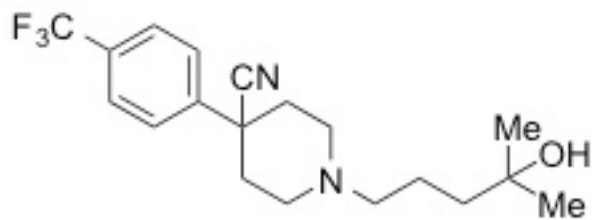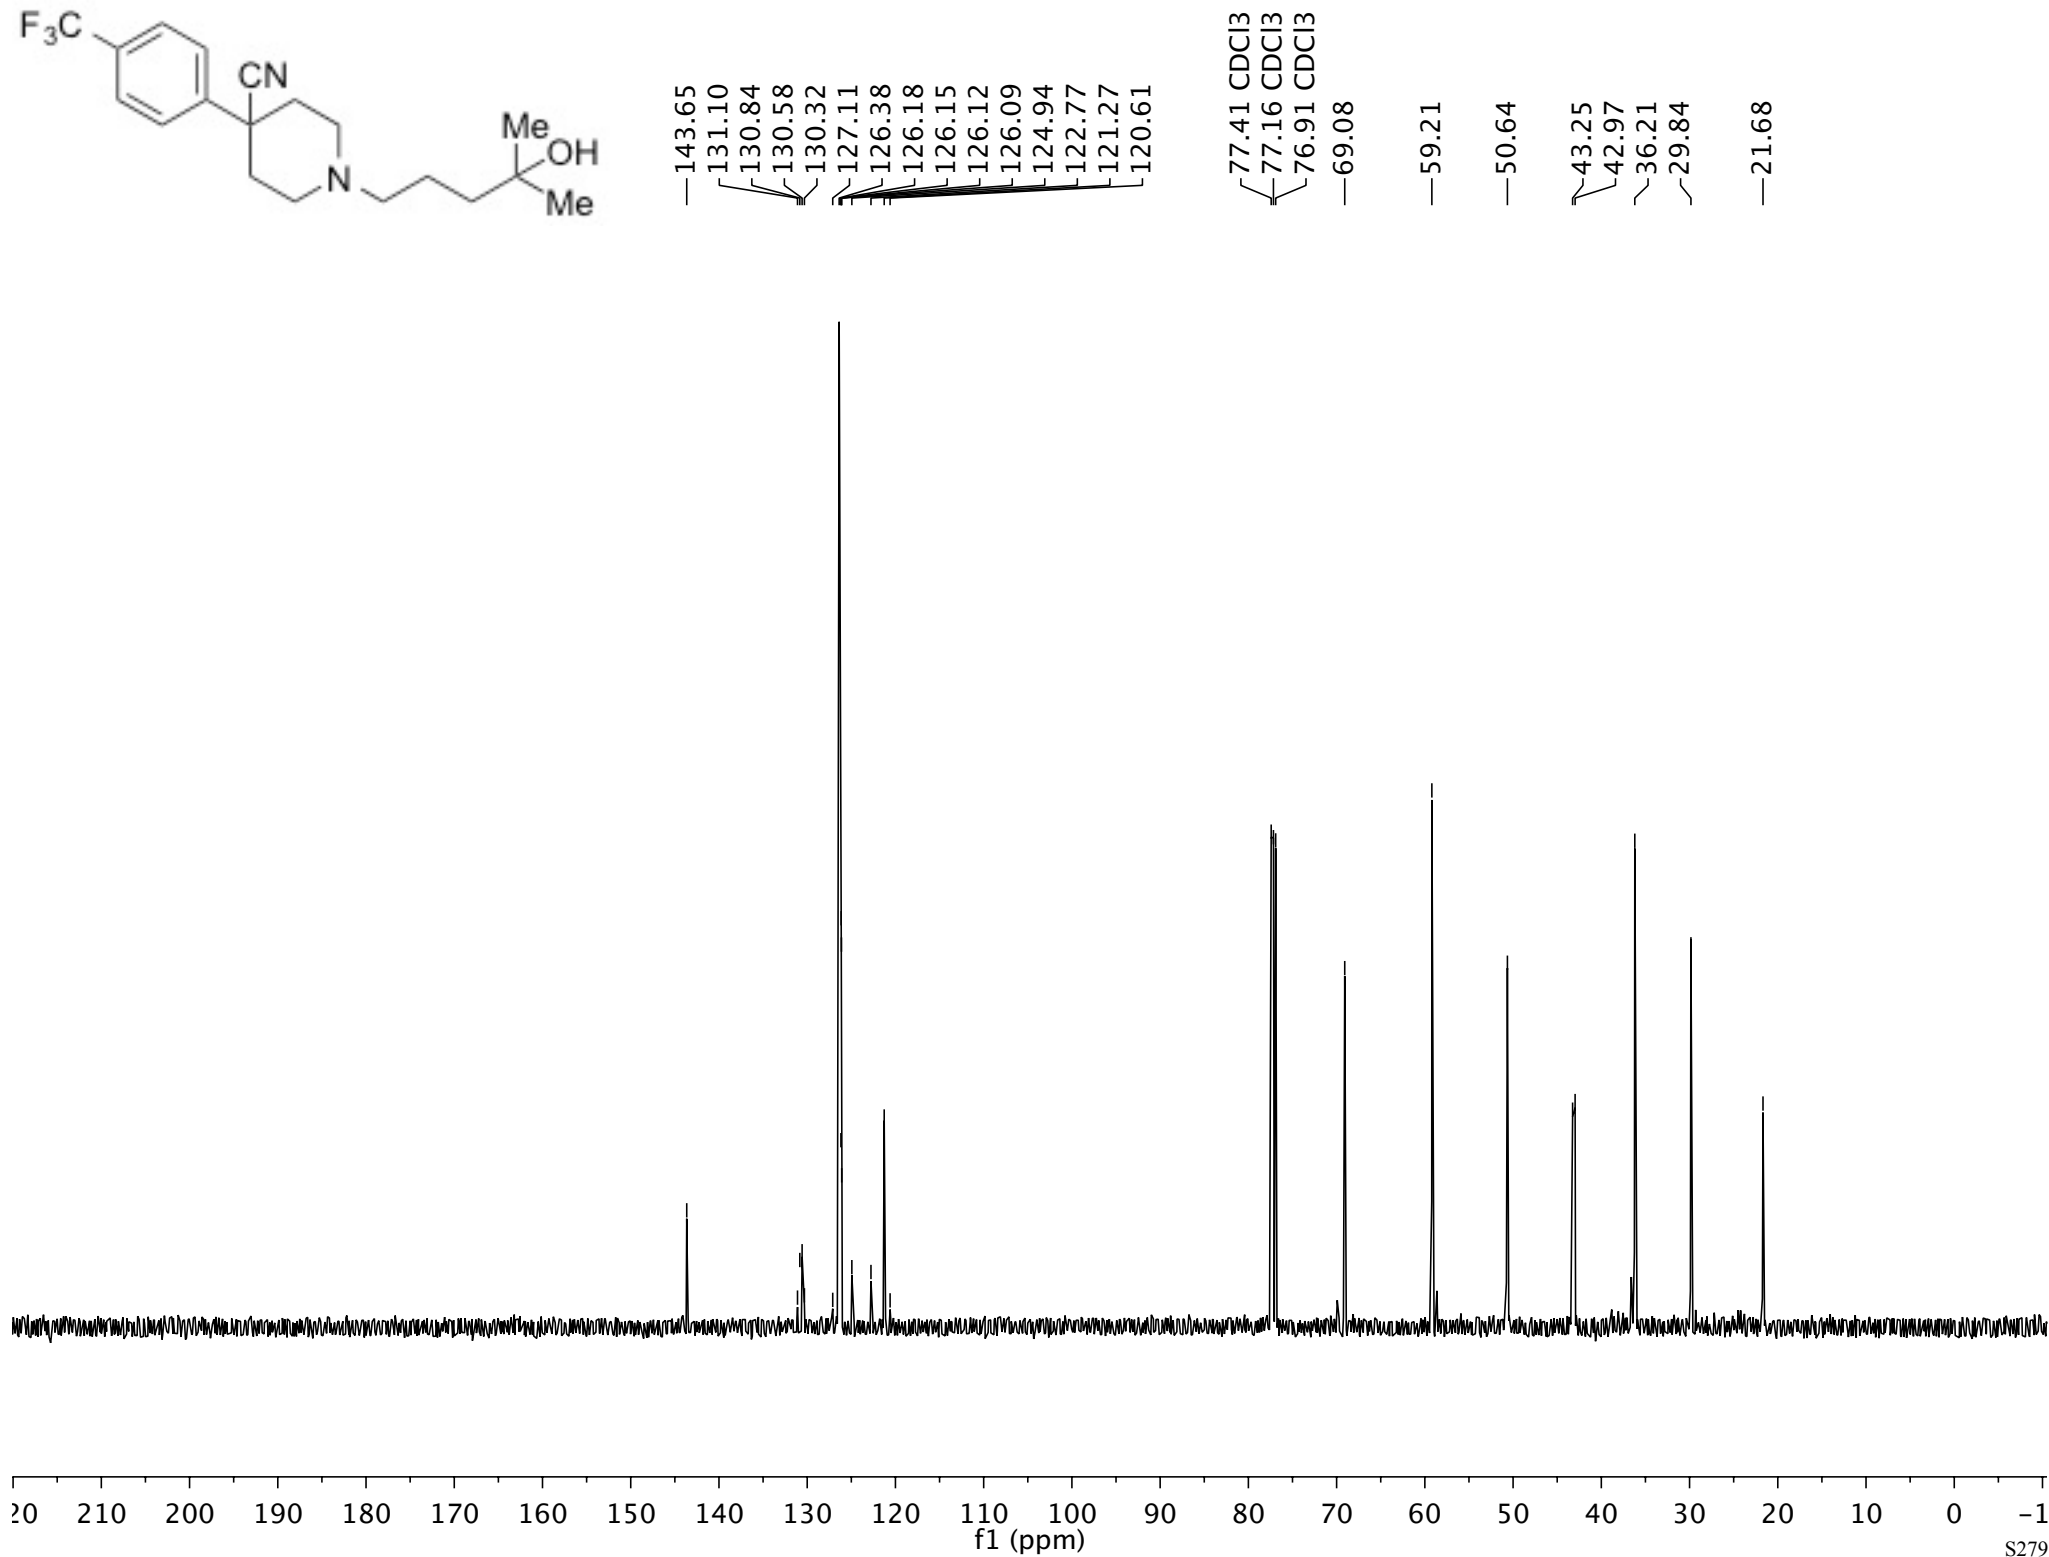



| Parameter              | Value     |
|------------------------|-----------|
| Origin                 | Varian    |
| Spectrometer           | inova     |
| Solvent                | CDCl3     |
| Temperature            | 20.0      |
| Pulse Sequence         | s2pul     |
| Experiment             | 1D        |
| Probe                  | QUADG     |
| Receiver Gain          | 56        |
| Relaxation Delay       | 1.5000    |
| Pulse Width            | 0.0000    |
| Acquisition Time       | 0.3277    |
| Spectrometer Frequency | 469.89    |
| Spectral Width         | 122137.4  |
| Lowest Frequency       | -108111.4 |
| Nucleus                | 19F       |
| Acquired Size          | 40022     |
| Spectral Size          | 131072    |

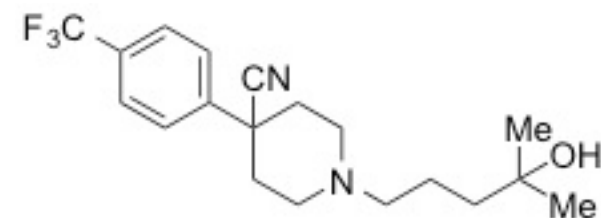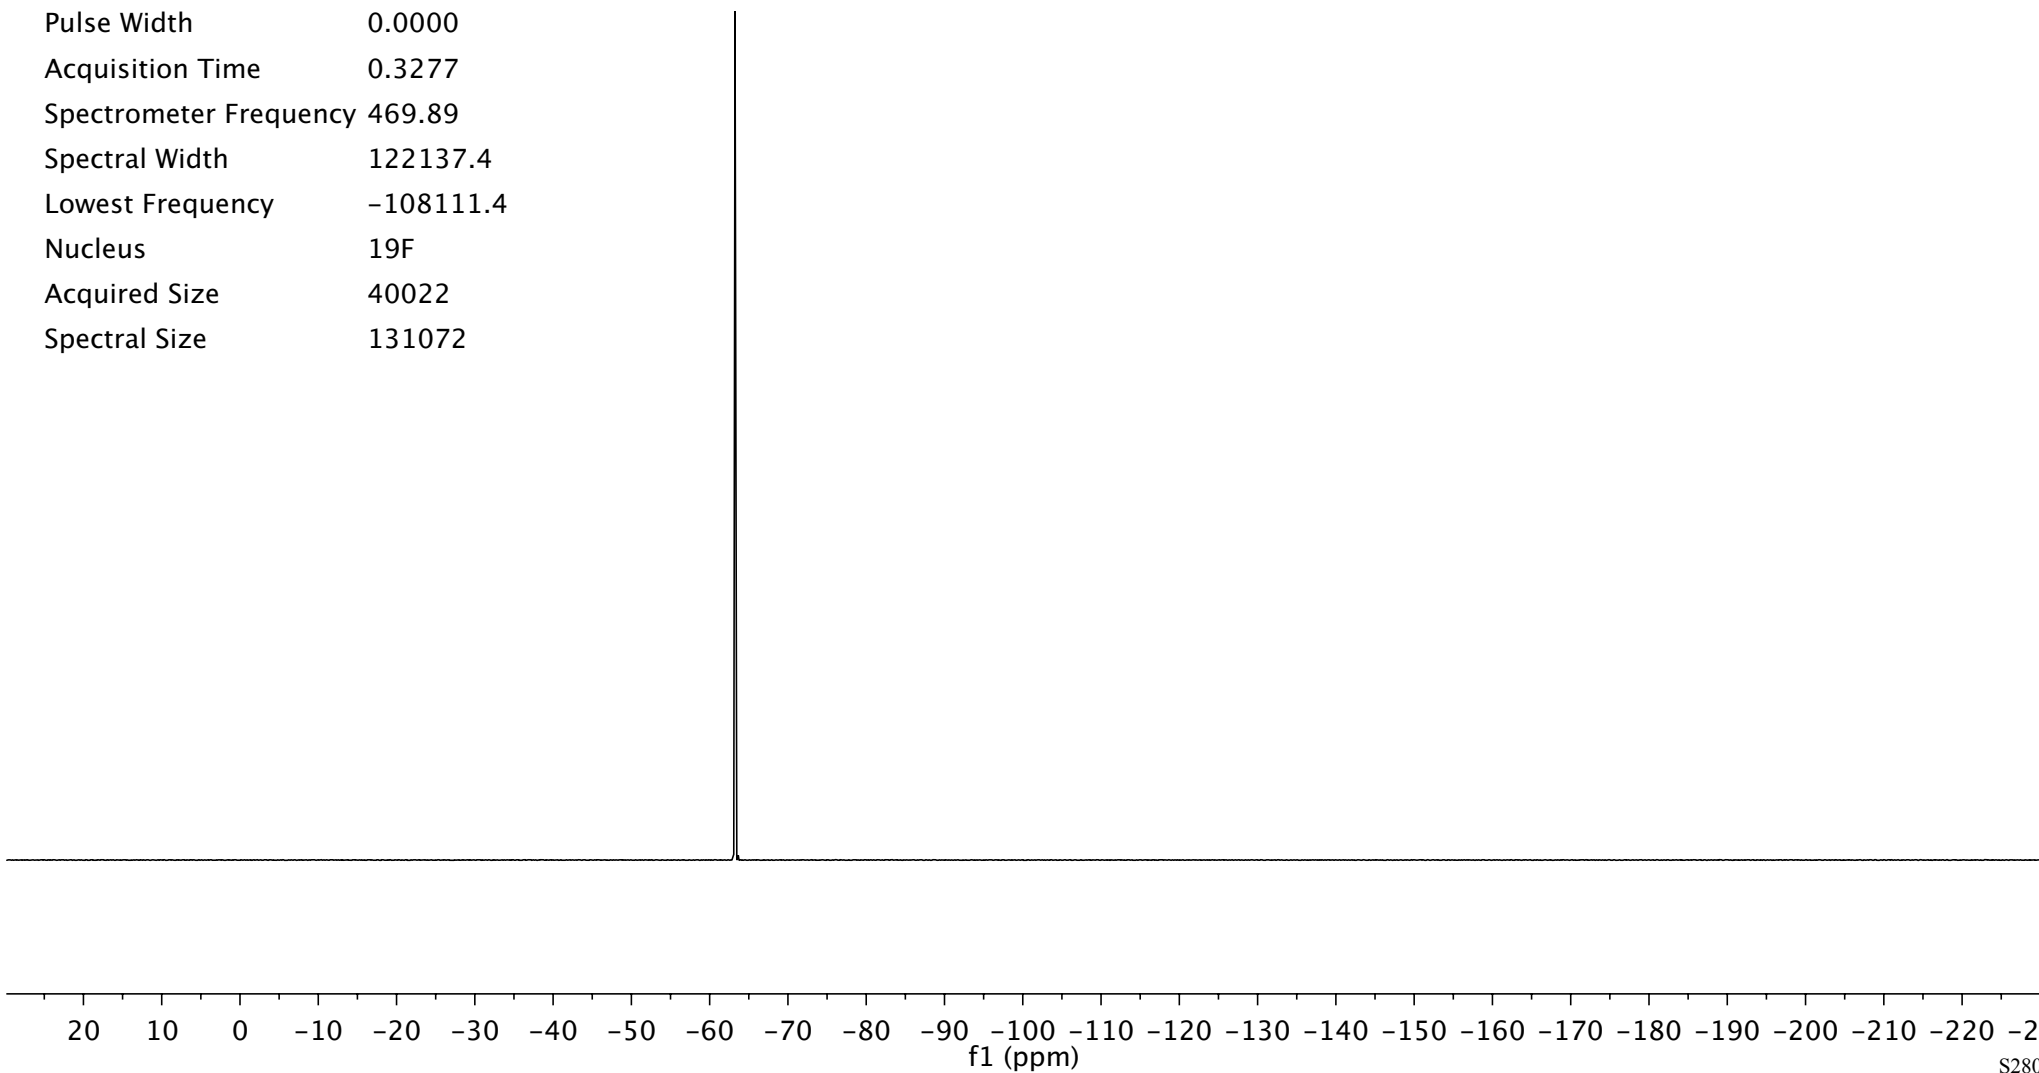

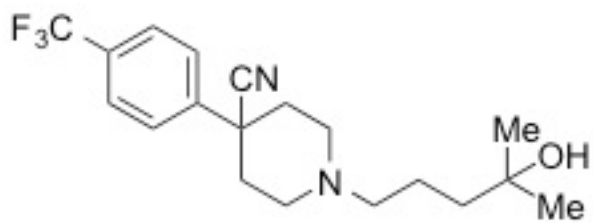

63.24

3.00

f1 (ppm)

| Parameter              | Value          |
|------------------------|----------------|
| Origin                 | Varian         |
| Spectrometer           | inova          |
| Solvent                | CDCl3          |
| Temperature            | 20.0           |
| Pulse Sequence         | s2pul          |
| Experiment             | 1D             |
| Probe                  | quad94         |
| Receiver Gain          | 46             |
| Relaxation Delay       | 0.0000         |
| Pulse Width            | 0.0000         |
| Acquisition Time       | 4.0960         |
| Spectrometer Frequency | 399.95         |
| Spectral Width         | 8000.0         |
| Lowest Frequency       | -2424.5        |
| Nucleus                | <sup>1</sup> H |
| Acquired Size          | 32768          |
| Spectral Size          | 65536          |

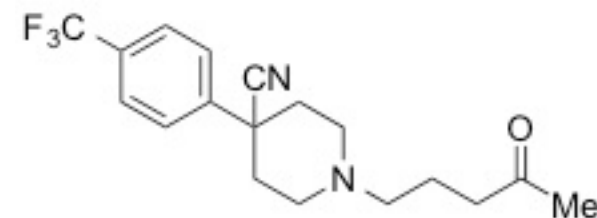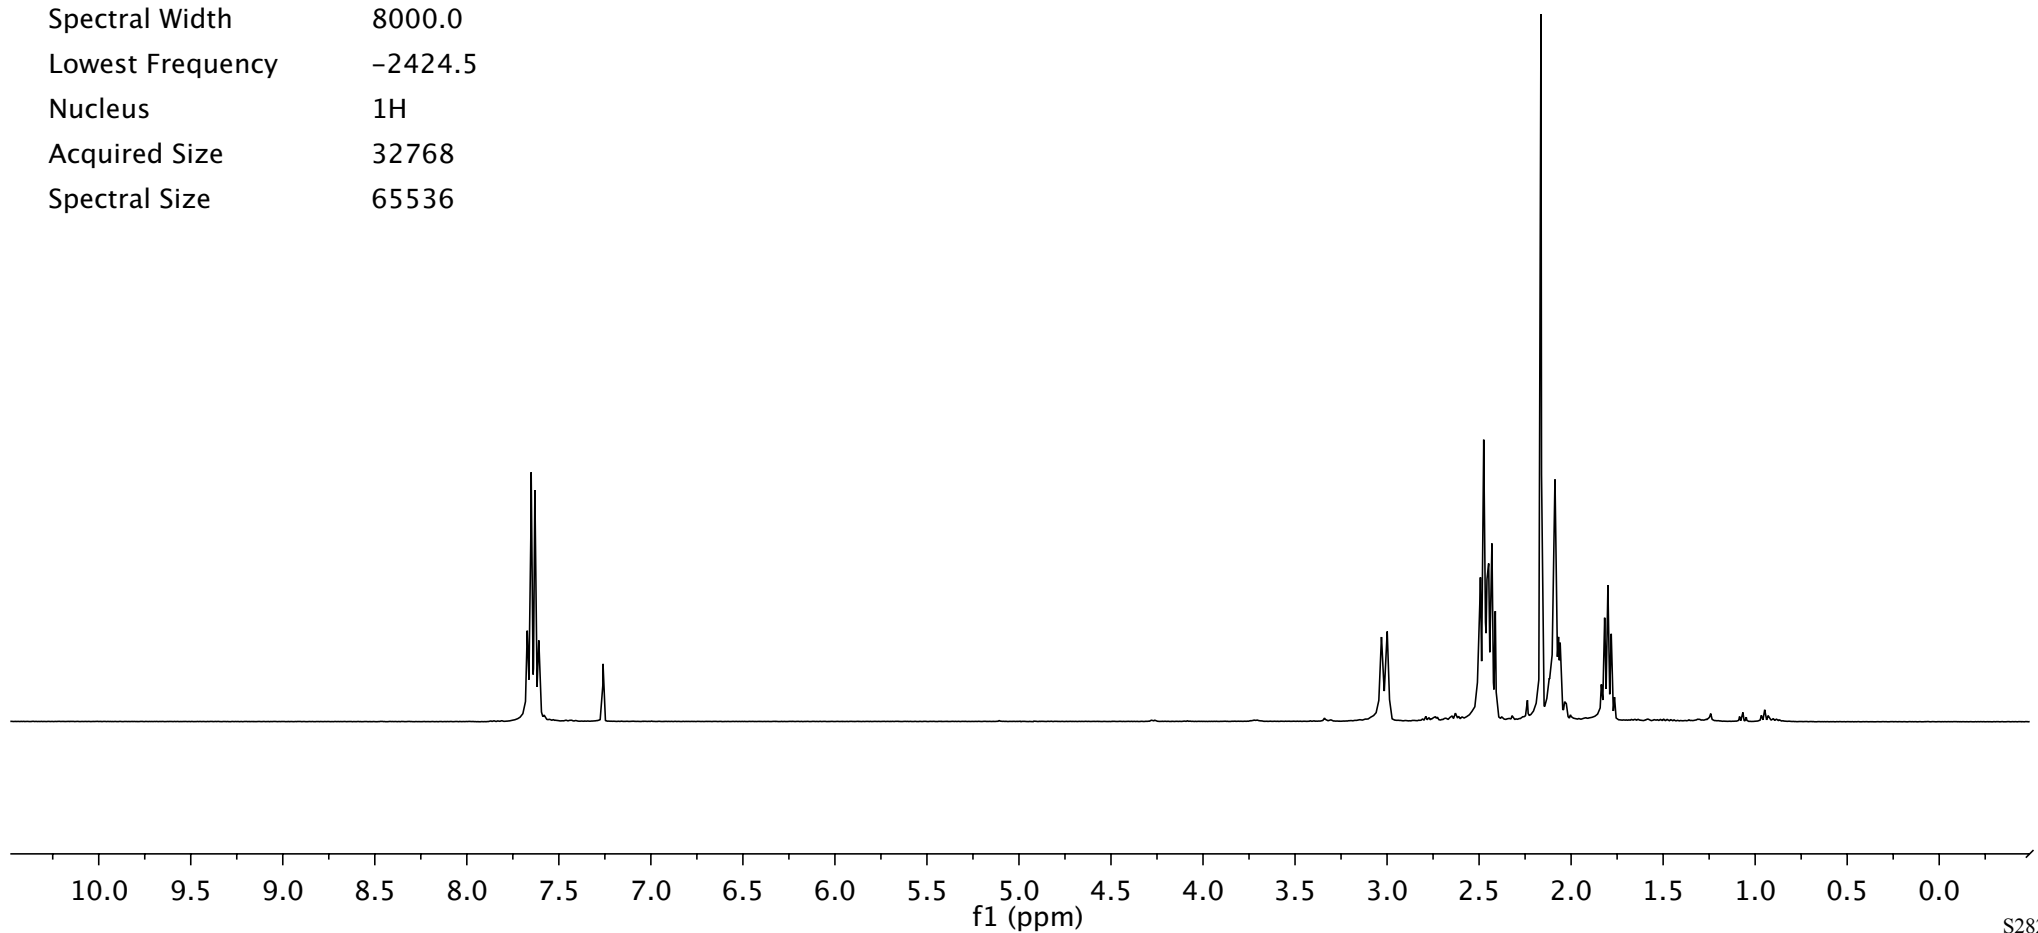

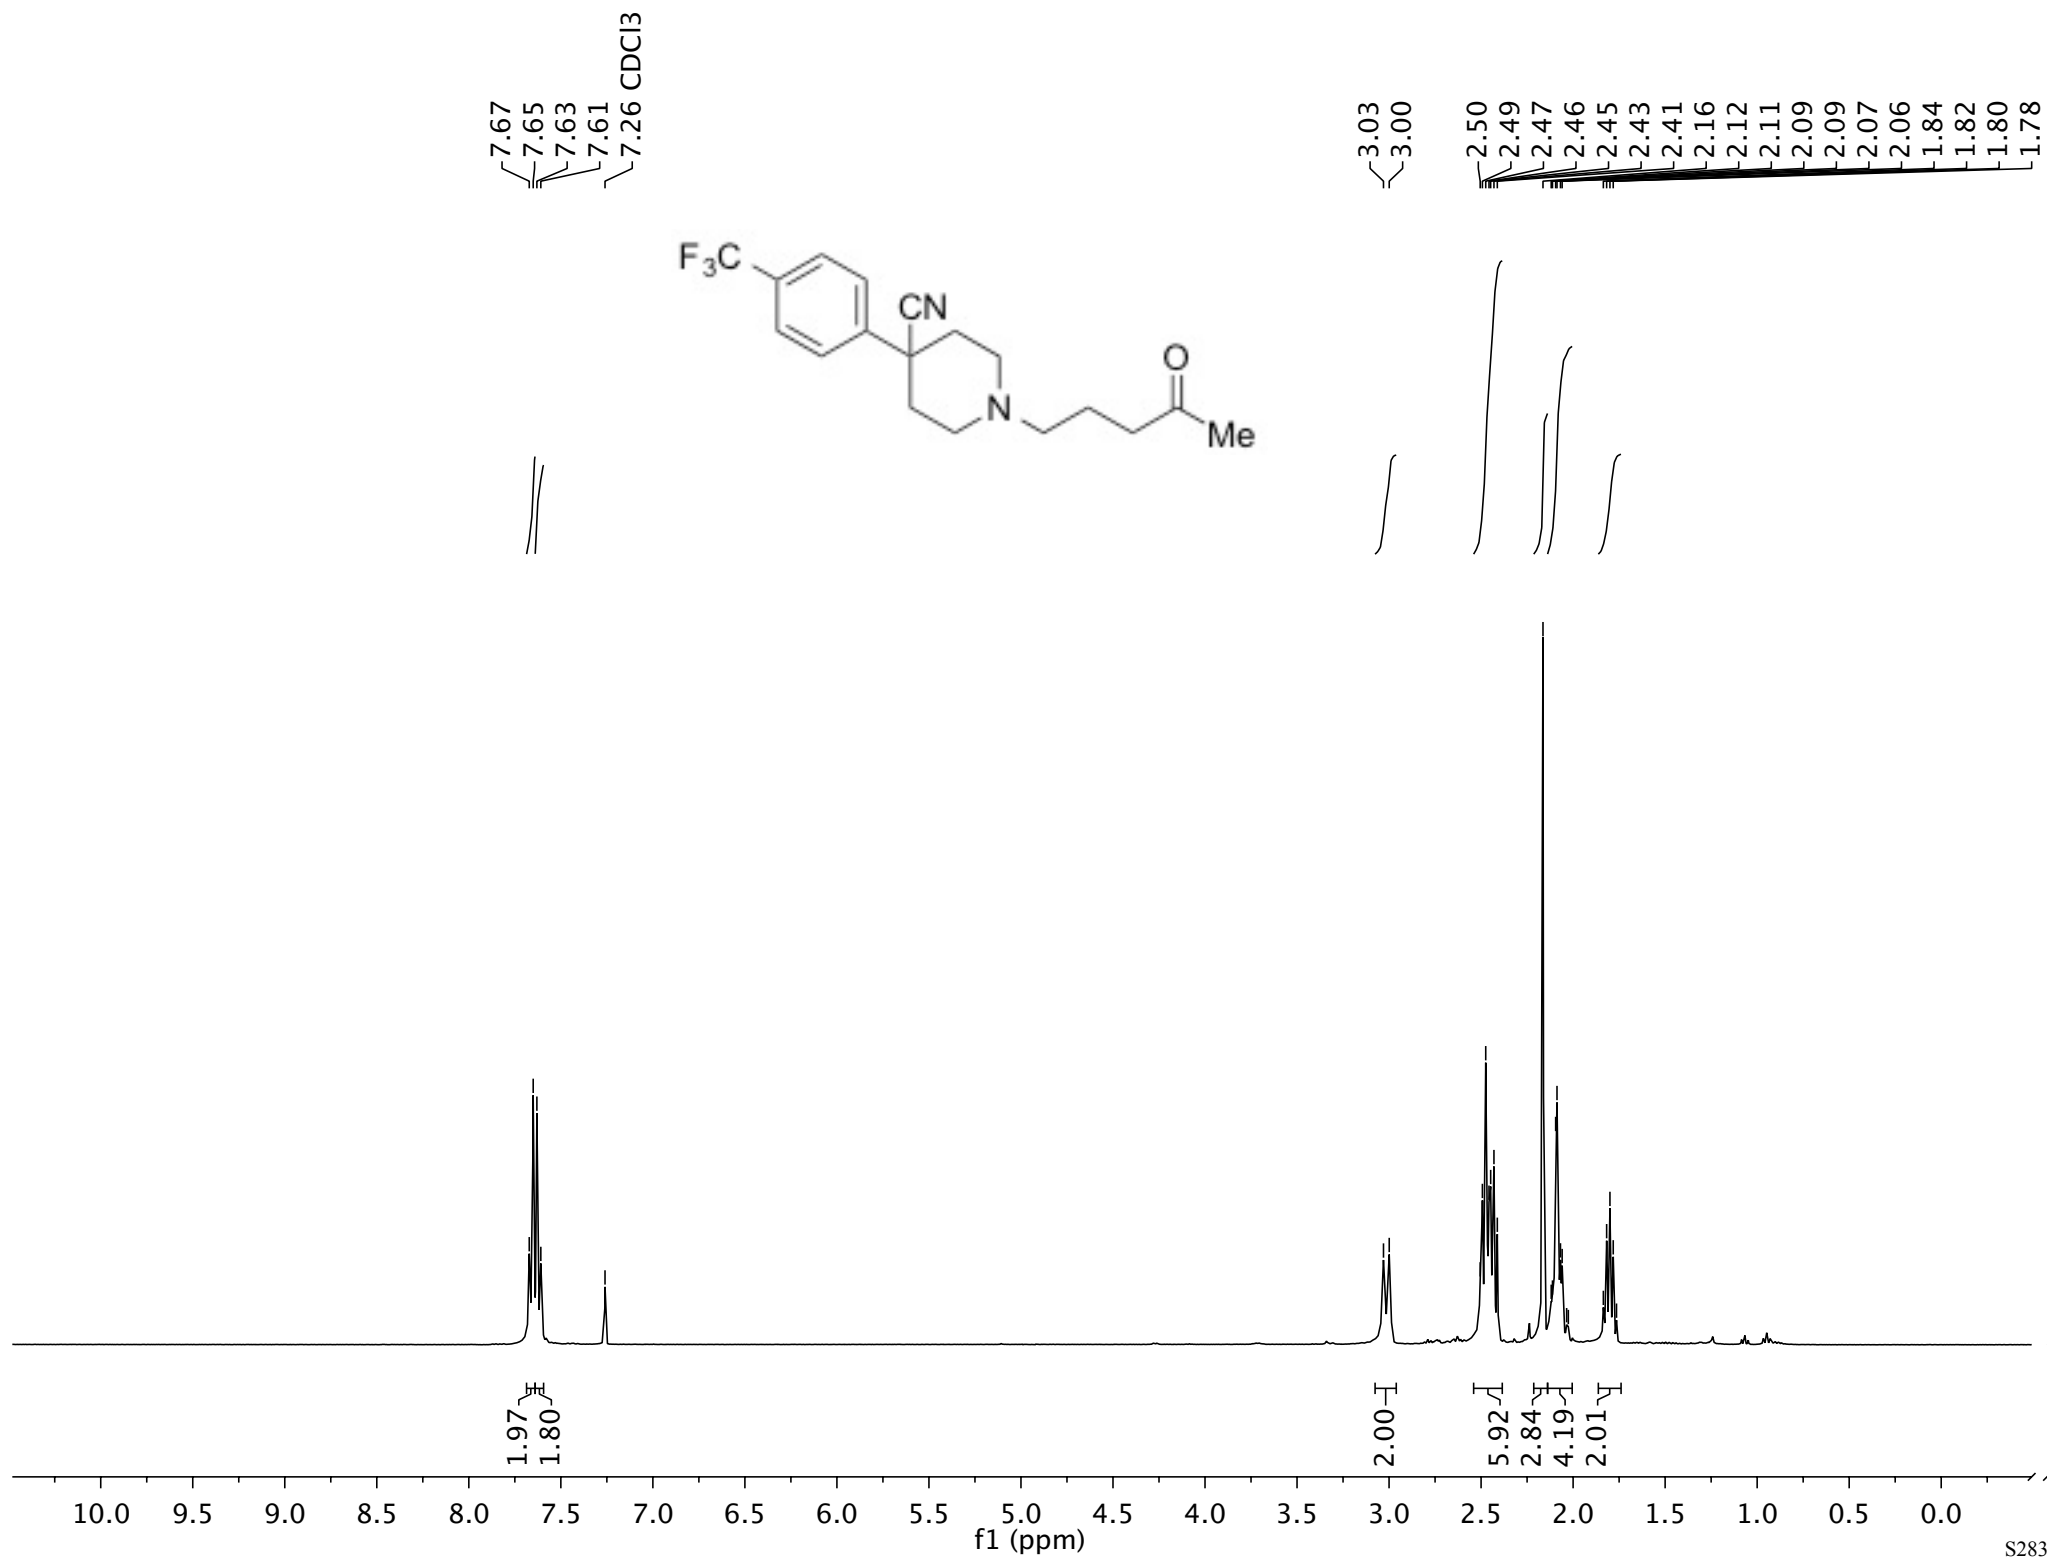

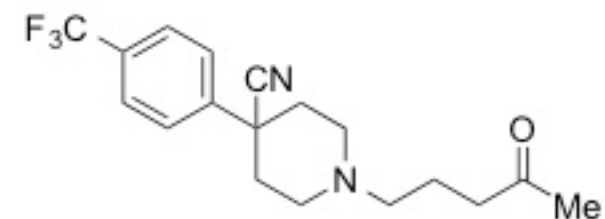

| Parameter              | Value           |
|------------------------|-----------------|
| Origin                 | Varian          |
| Spectrometer           | inova           |
| Solvent                | CDCl3           |
| Temperature            | 25.0            |
| Pulse Sequence         | s2pul           |
| Experiment             | 1D              |
| Probe                  | QUAD            |
| Receiver Gain          | 60              |
| Relaxation Delay       | 1.0000          |
| Pulse Width            | 0.0000          |
| Acquisition Time       | 1.0863          |
| Spectrometer Frequency | 125.66          |
| Spectral Width         | 30165.9         |
| Lowest Frequency       | -1275.8         |
| Nucleus                | <sup>13</sup> C |
| Acquired Size          | 32768           |
| Spectral Size          | 65536           |

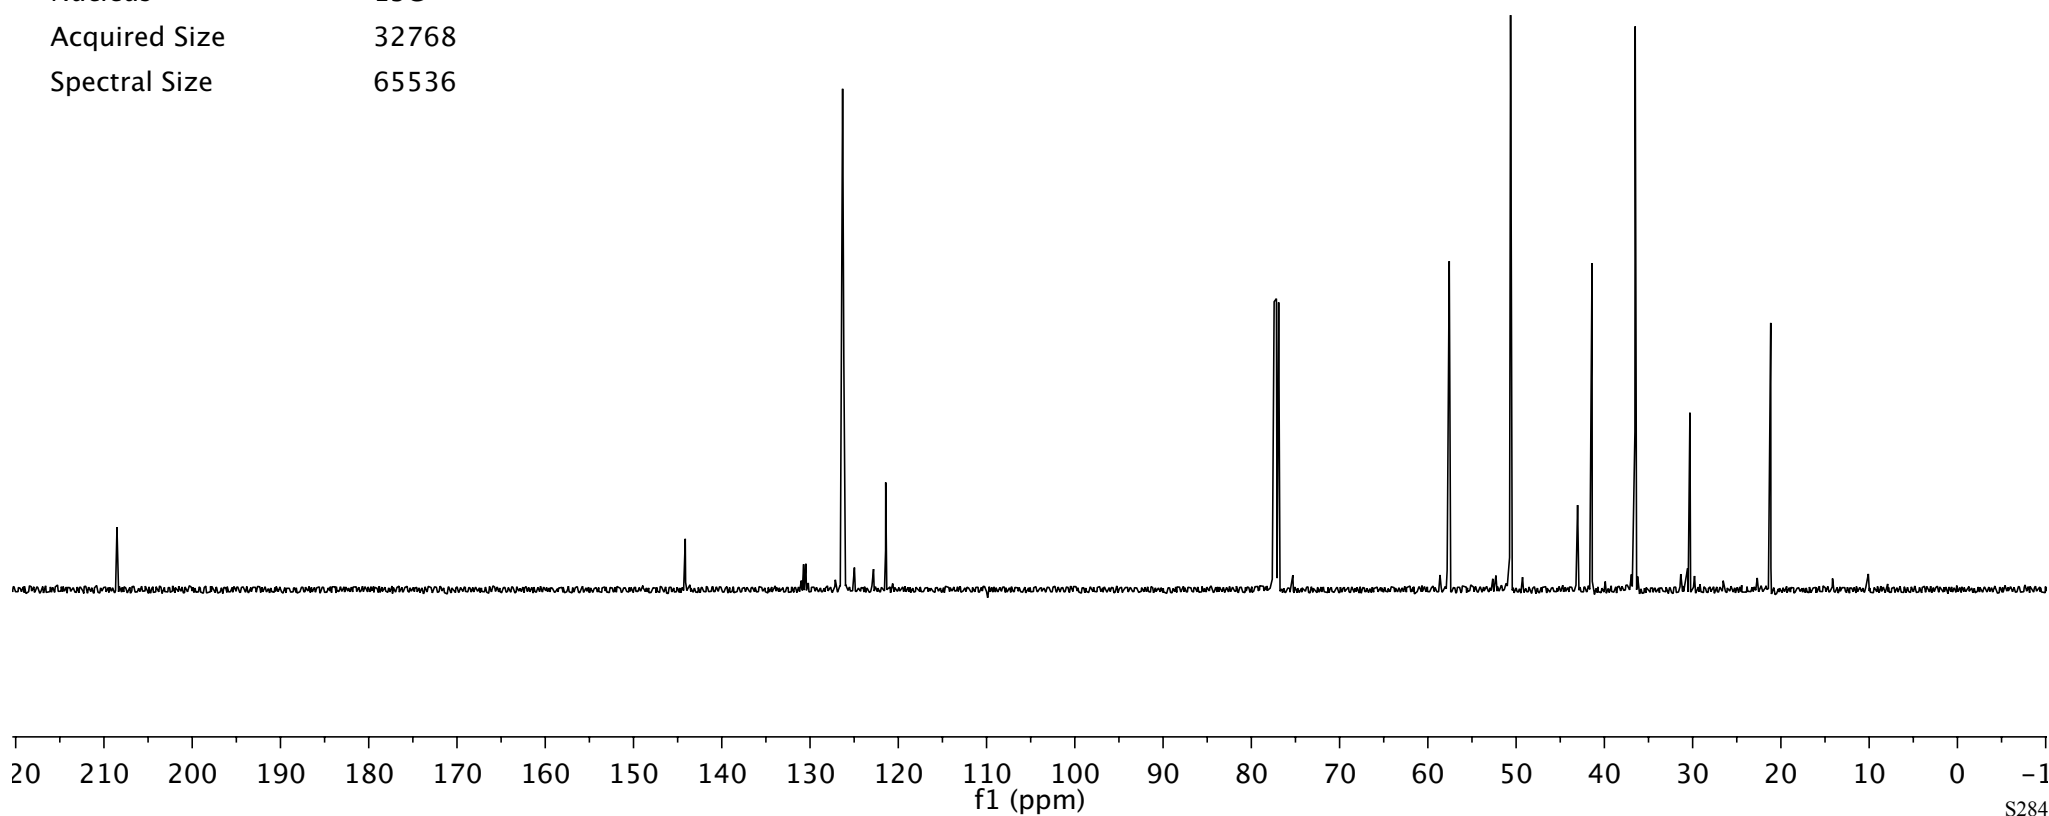

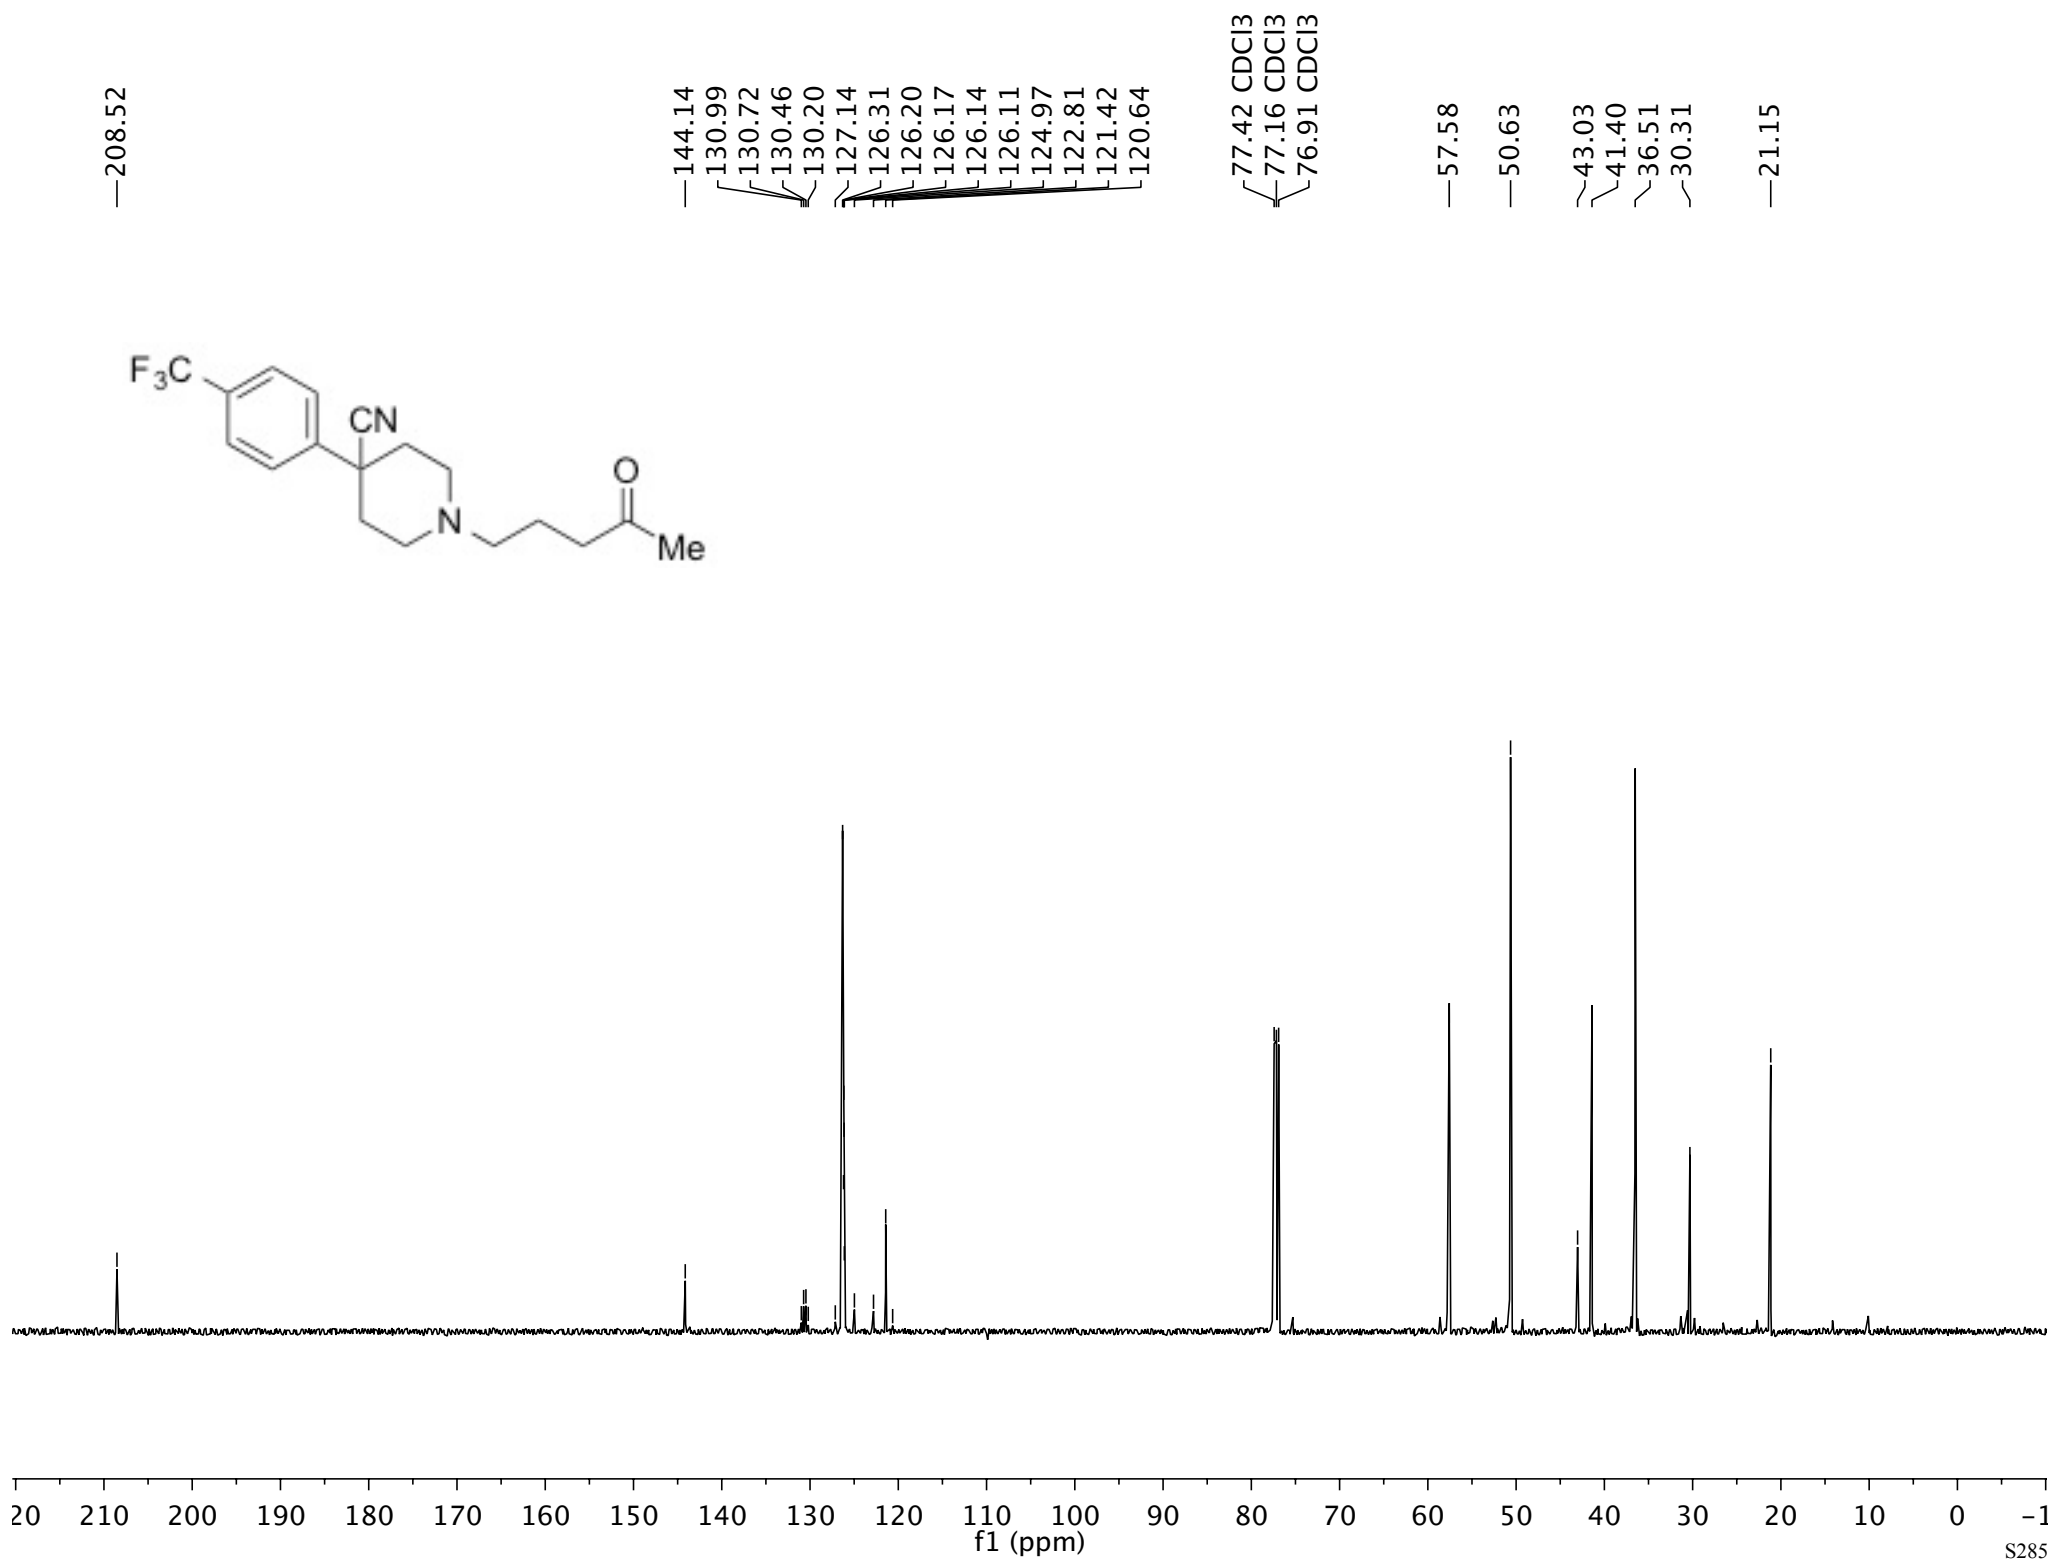

| Parameter              | Value           |
|------------------------|-----------------|
| Origin                 | Varian          |
| Spectrometer           | inova           |
| Solvent                | CDCl3           |
| Temperature            | 25.0            |
| Pulse Sequence         | s2pul           |
| Experiment             | 1D              |
| Probe                  | QUAD            |
| Receiver Gain          | 50              |
| Relaxation Delay       | 0.0000          |
| Pulse Width            | 0.0000          |
| Acquisition Time       | 0.3277          |
| Spectrometer Frequency | 470.15          |
| Spectral Width         | 100000.0        |
| Lowest Frequency       | -79541.0        |
| Nucleus                | <sup>19</sup> F |
| Acquired Size          | 32768           |
| Spectral Size          | 65536           |

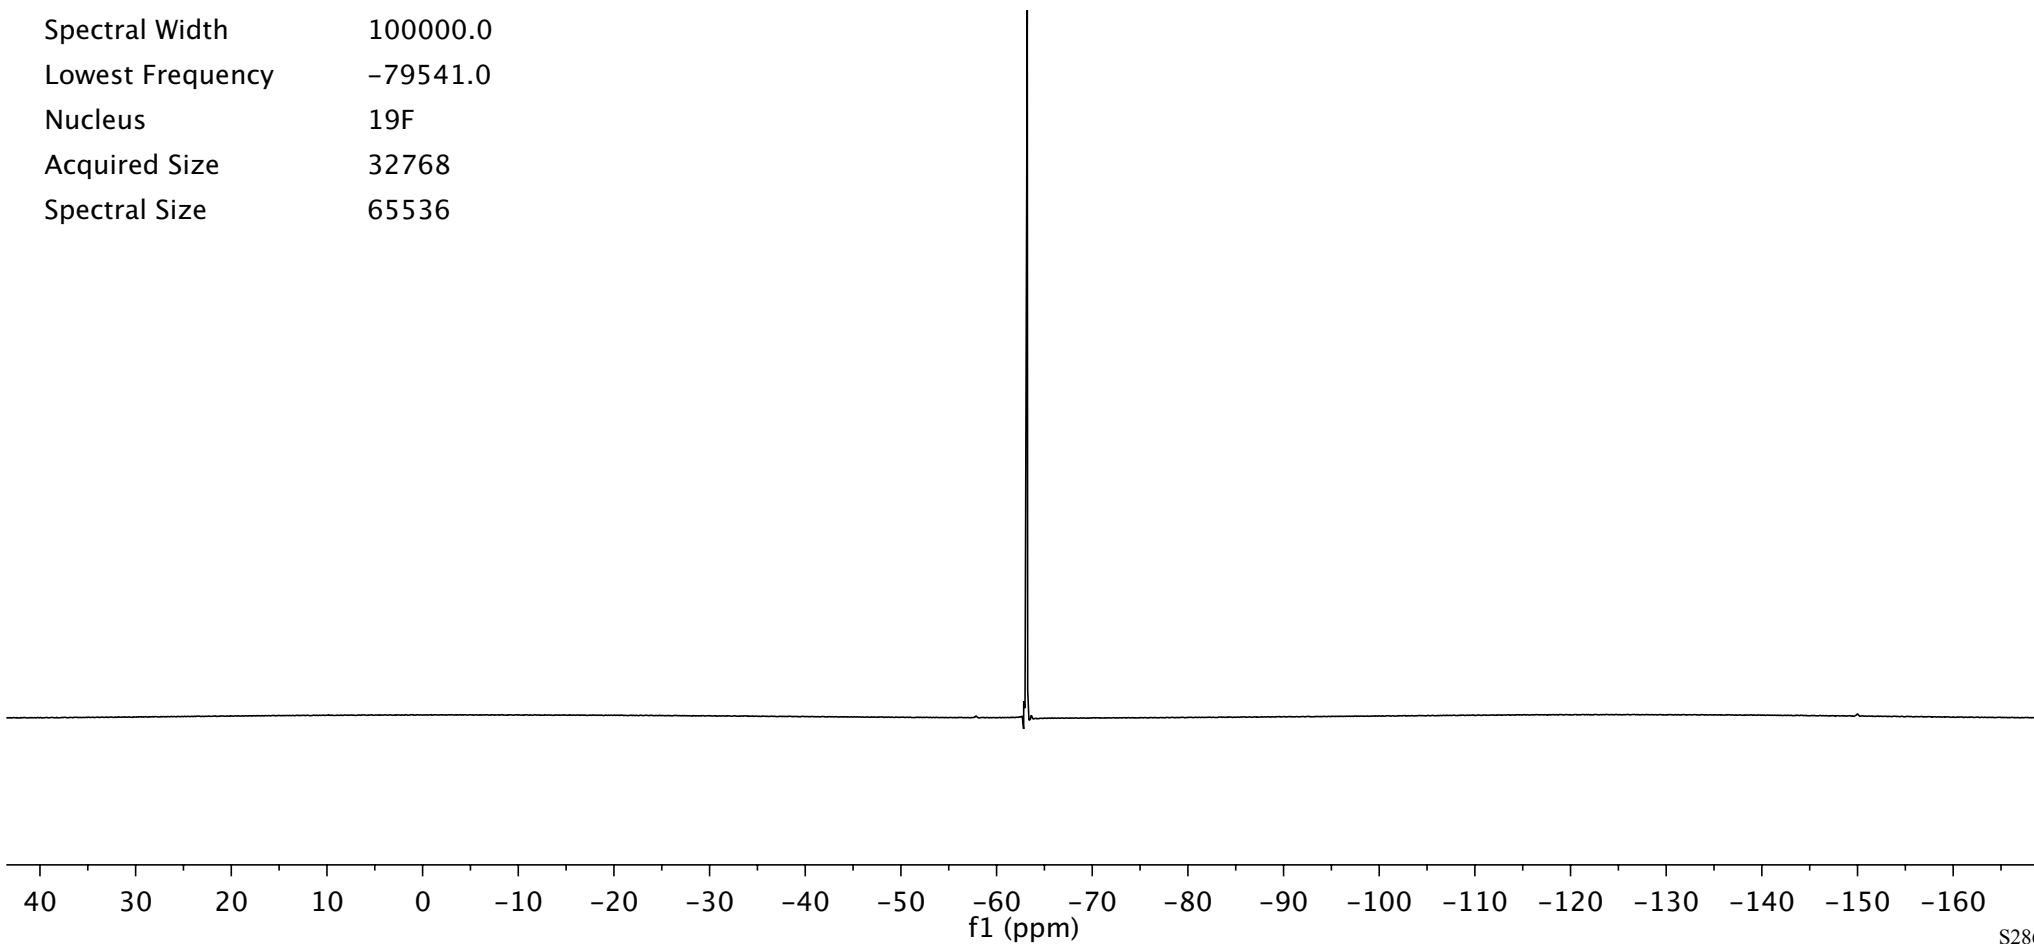

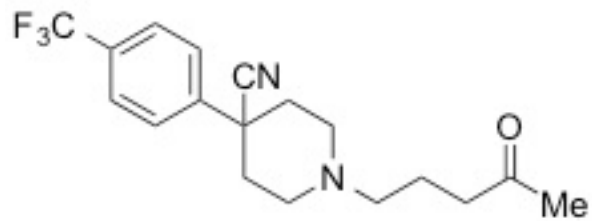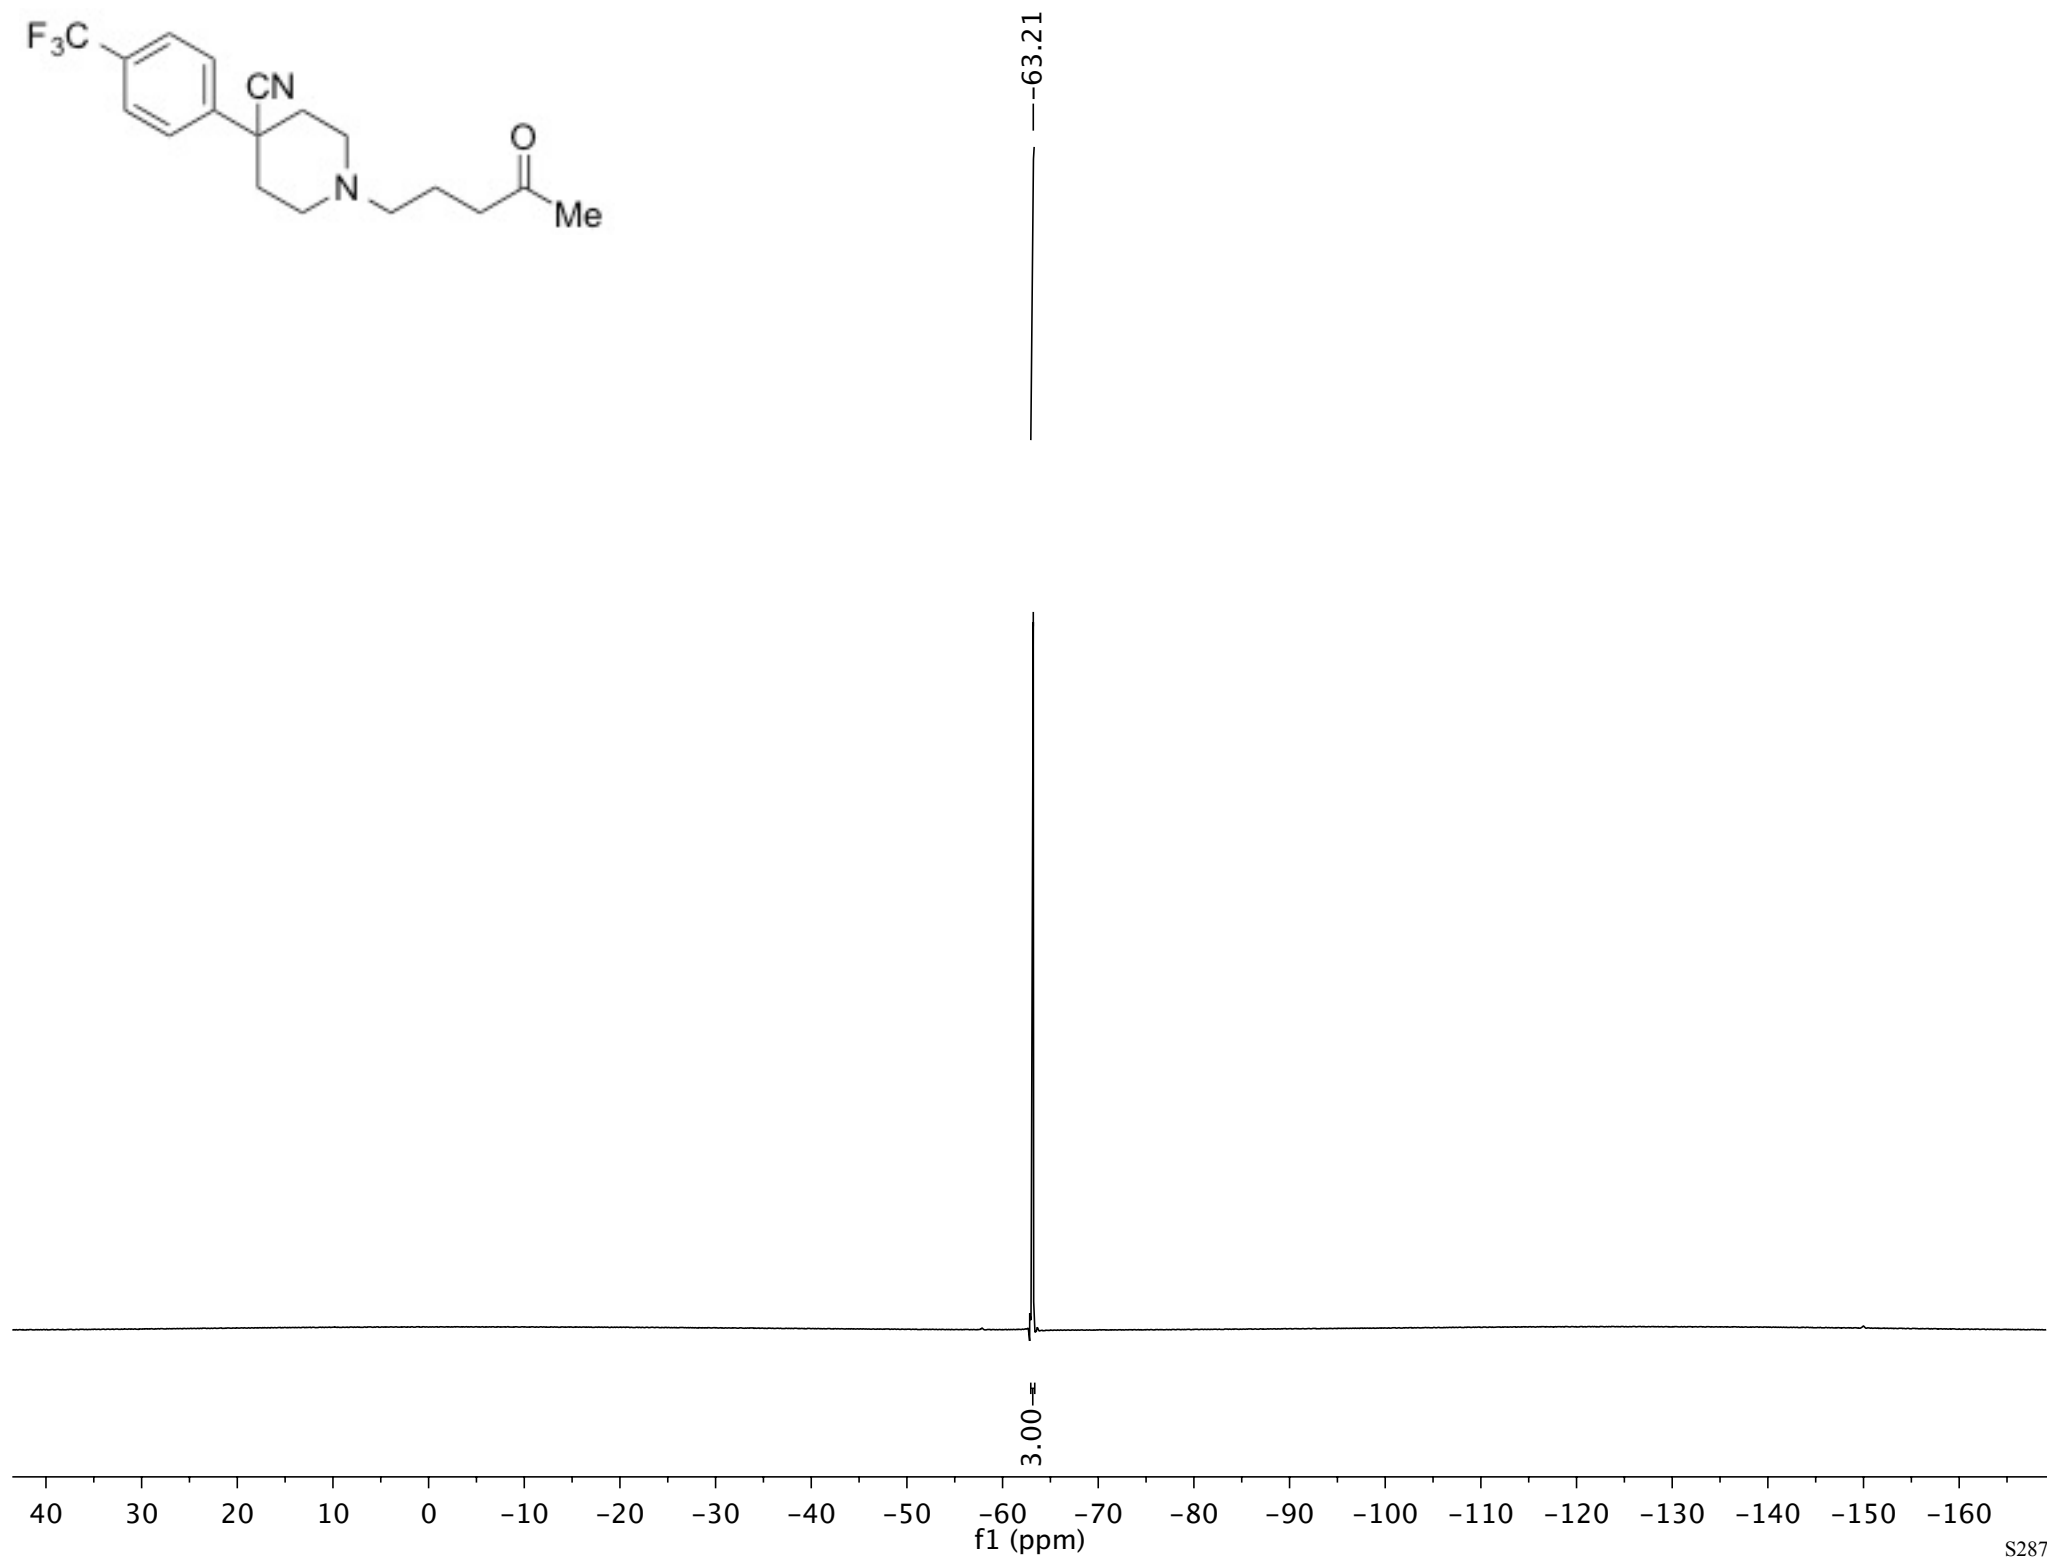



| Parameter              | Value   |
|------------------------|---------|
| Origin                 | Varian  |
| Spectrometer           | inova   |
| Solvent                | CDCl3   |
| Temperature            | 20.0    |
| Pulse Sequence         | s2pul   |
| Experiment             | 1D      |
| Probe                  | QUADG   |
| Receiver Gain          | 44      |
| Relaxation Delay       | 5.0000  |
| Pulse Width            | 0.0000  |
| Acquisition Time       | 4.0960  |
| Spectrometer Frequency | 499.43  |
| Spectral Width         | 8000.0  |
| Lowest Frequency       | -1518.9 |
| Nucleus                | 1H      |
| Acquired Size          | 32768   |
| Spectral Size          | 65536   |

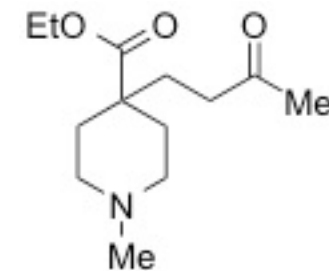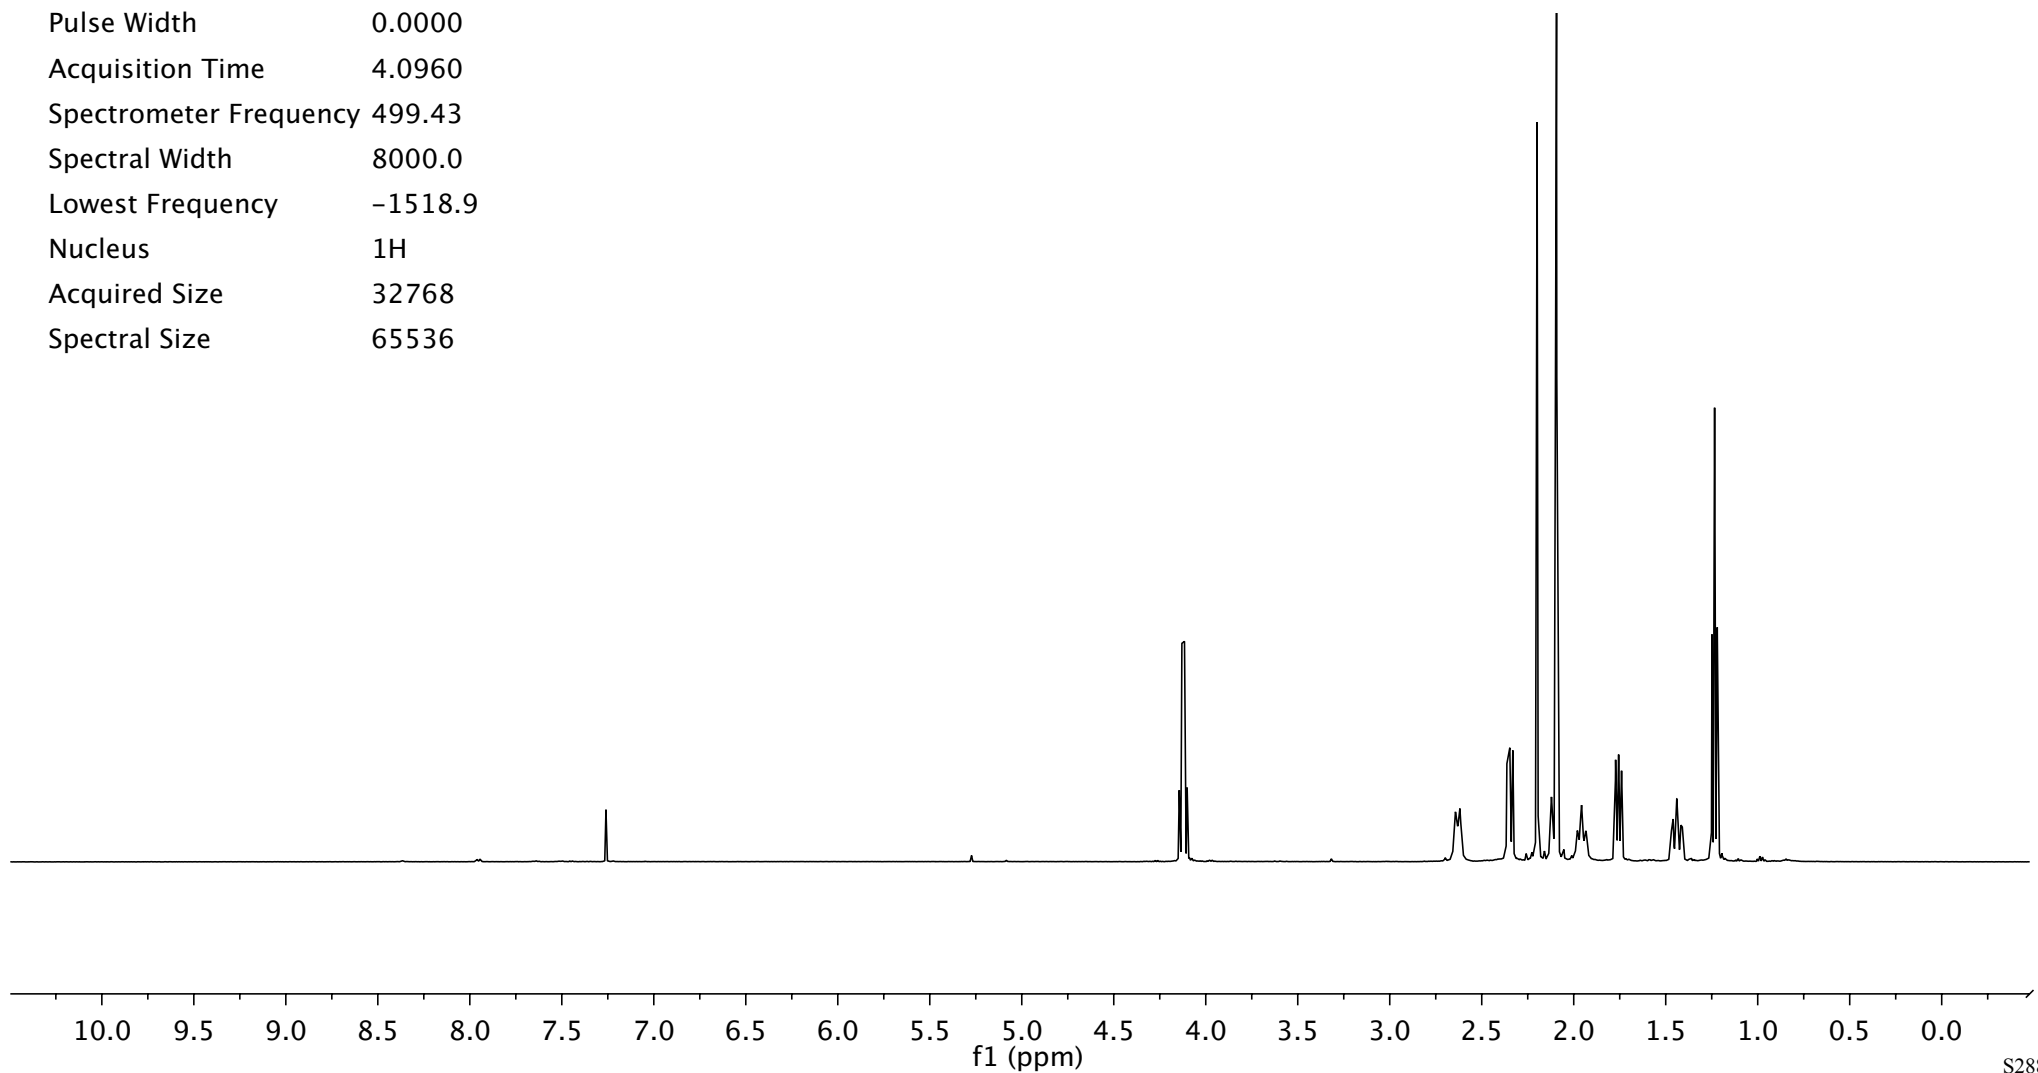

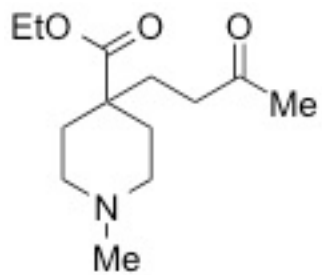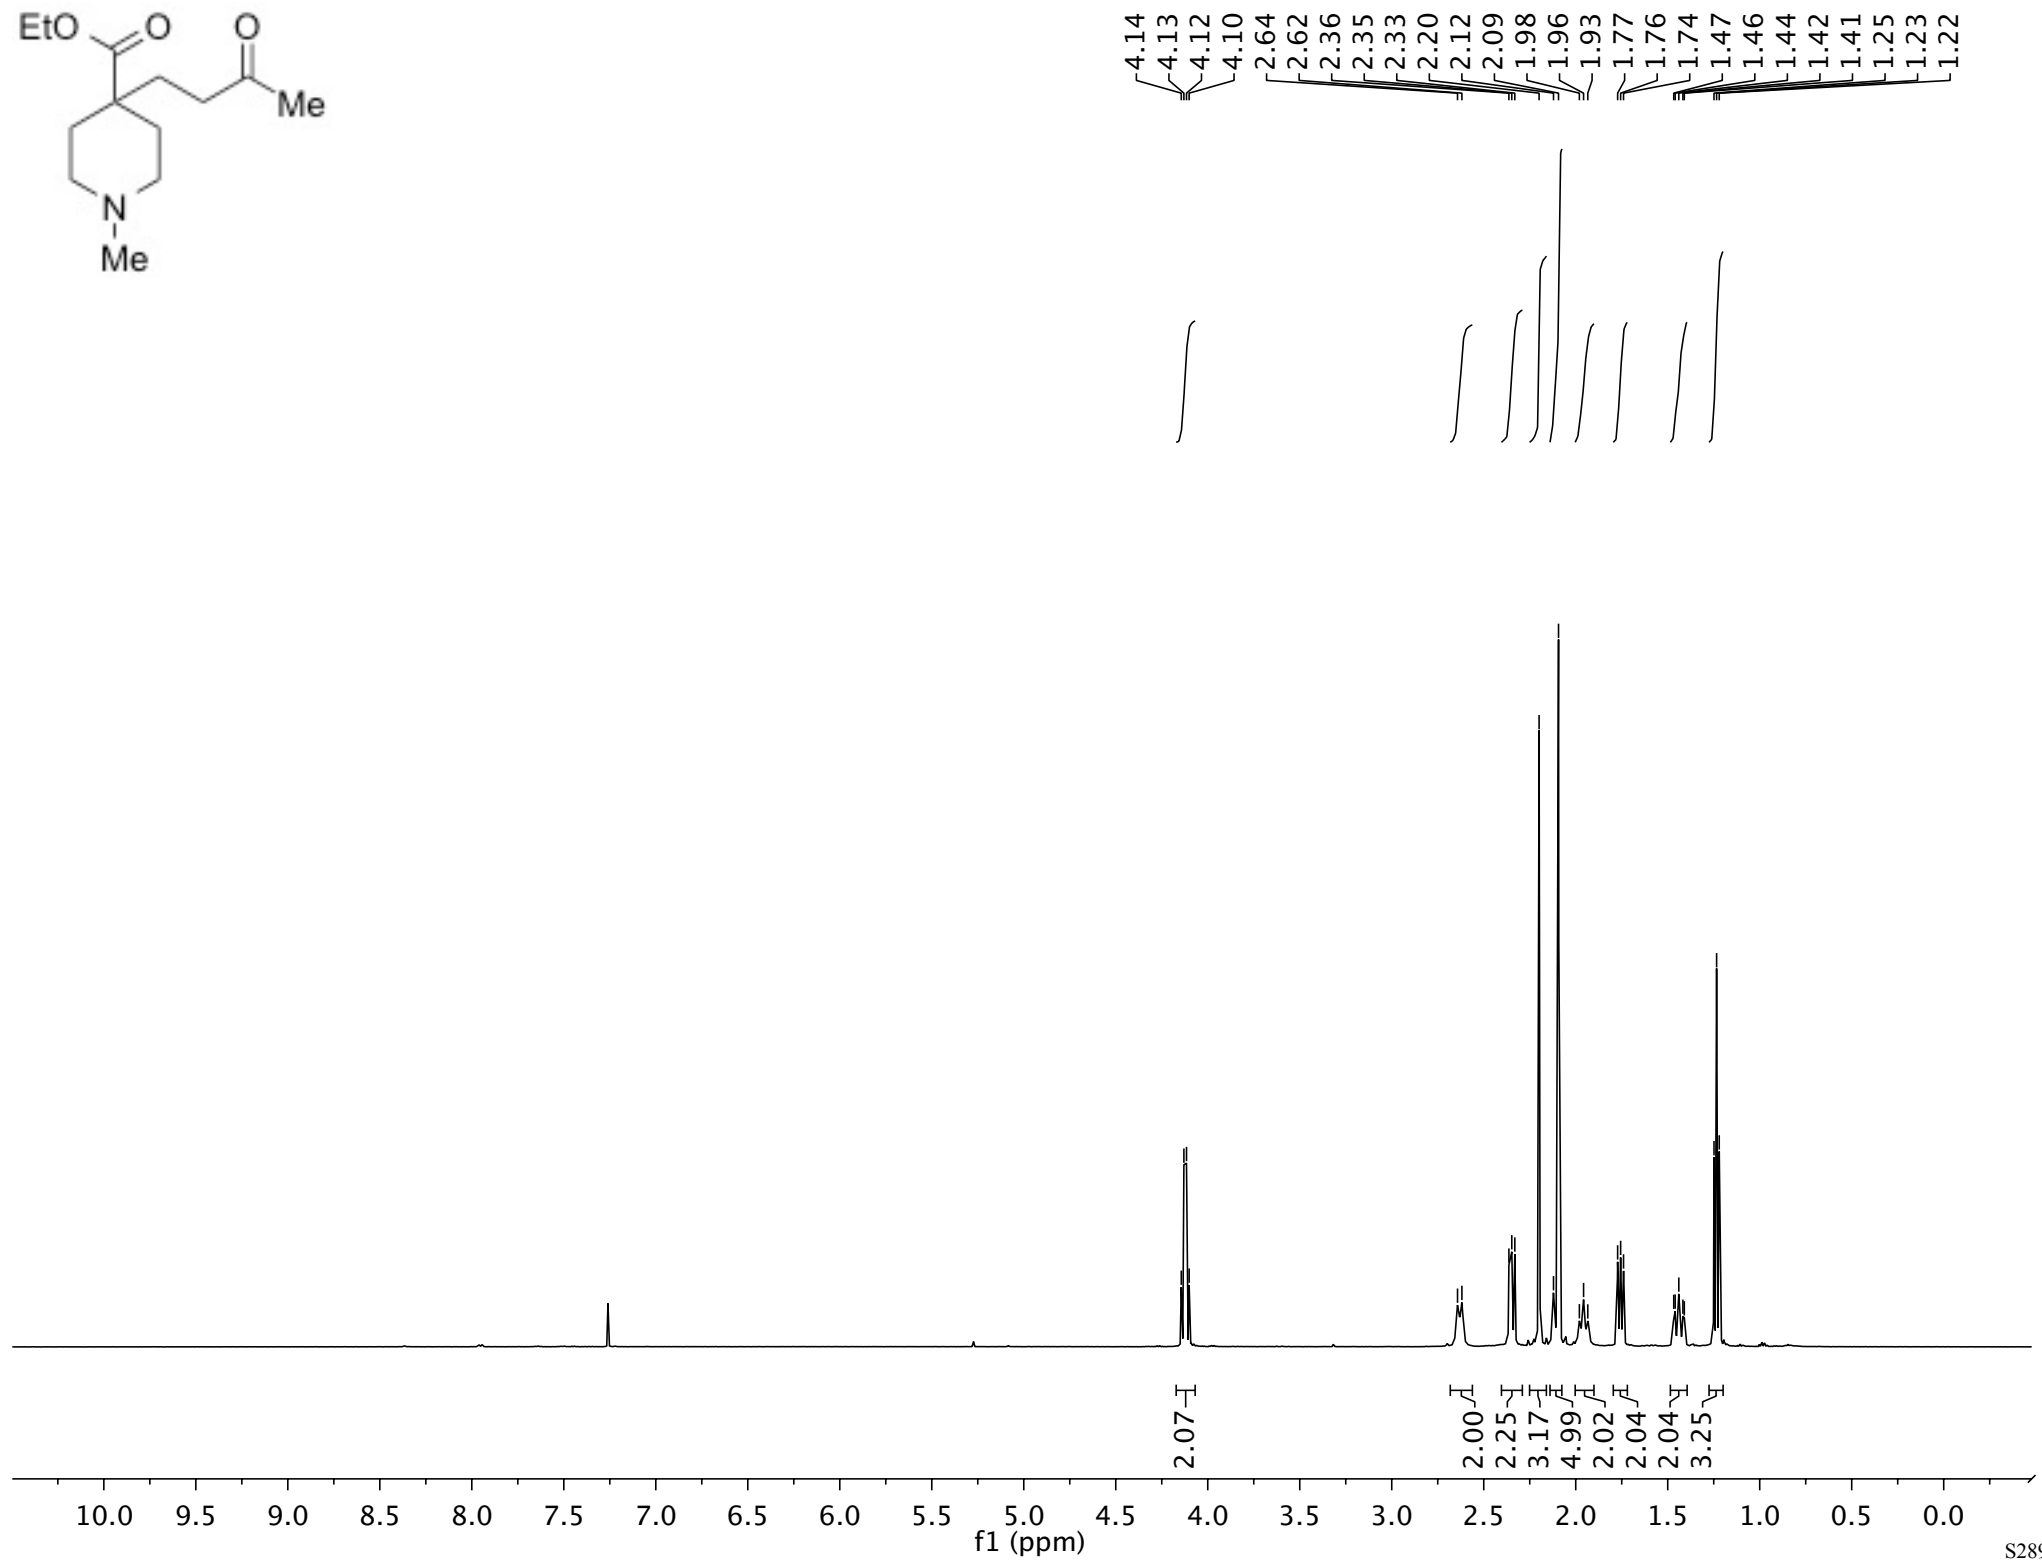

| Parameter              | Value   |
|------------------------|---------|
| Origin                 | Varian  |
| Spectrometer           | inova   |
| Solvent                | CDCl3   |
| Temperature            | 20.0    |
| Pulse Sequence         | s2pul   |
| Experiment             | 1D      |
| Probe                  | quad94  |
| Receiver Gain          | 60      |
| Relaxation Delay       | 2.0000  |
| Pulse Width            | 0.0000  |
| Acquisition Time       | 1.3107  |
| Spectrometer Frequency | 100.58  |
| Spectral Width         | 25000.0 |
| Lowest Frequency       | -1028.1 |
| Nucleus                | 13C     |
| Acquired Size          | 32768   |
| Spectral Size          | 65536   |

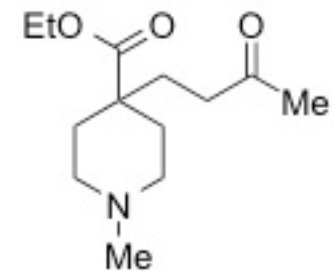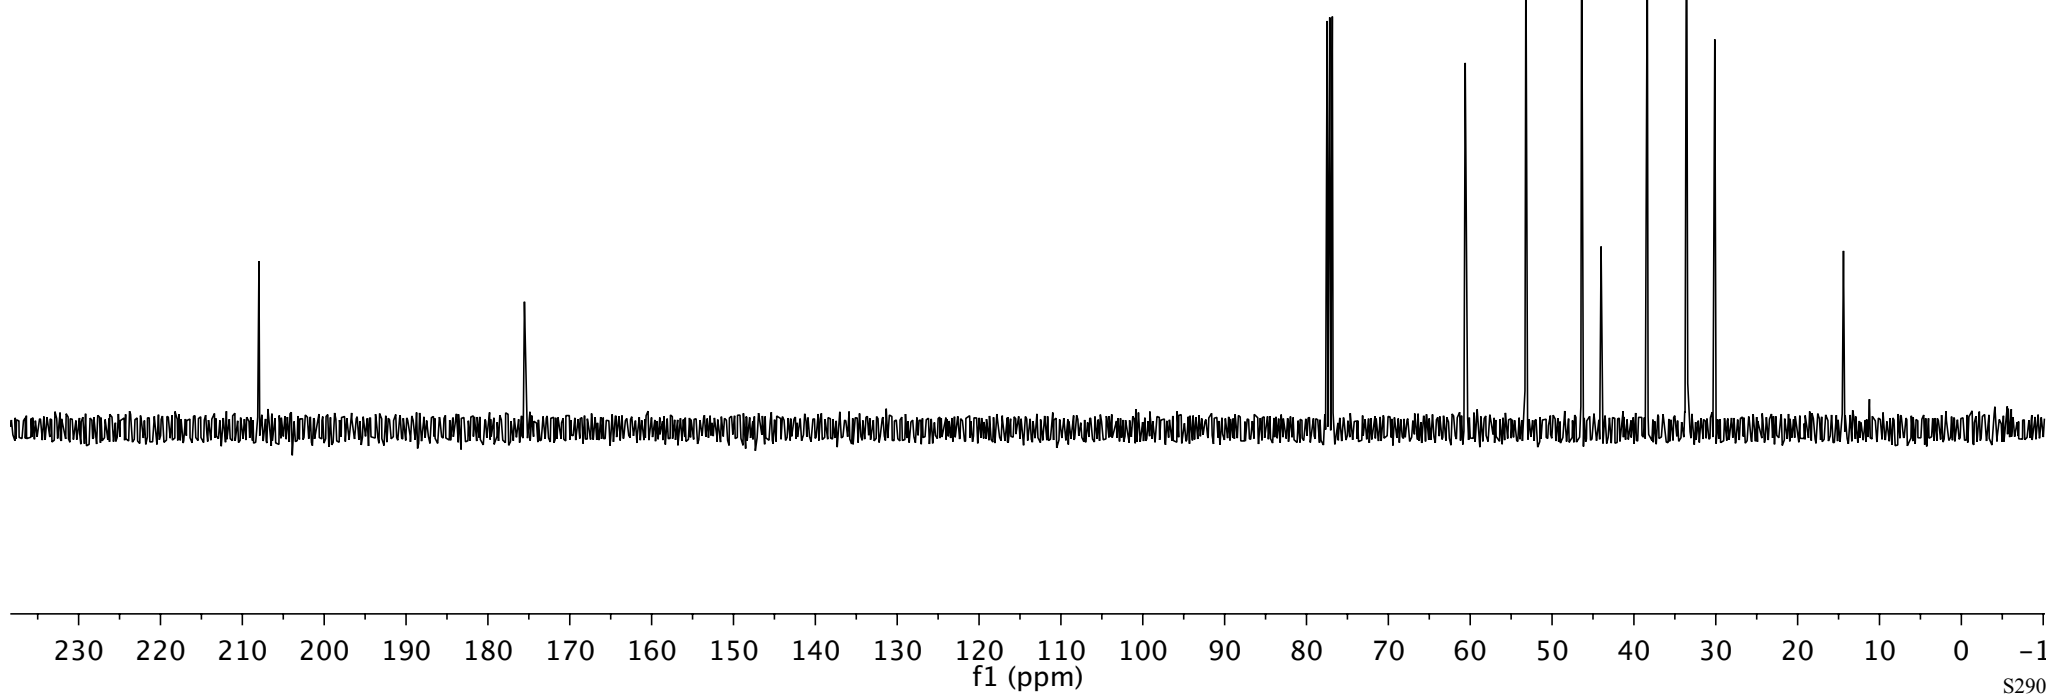

—207.97

—175.54

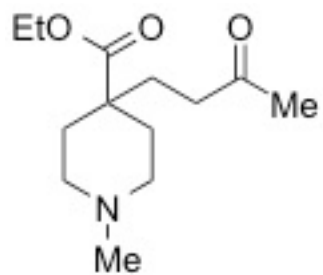

77.48 CDCl<sub>3</sub>  
77.16 CDCl<sub>3</sub>  
76.84 CDCl<sub>3</sub>

60.61  
53.20  
46.39  
44.01  
38.36  
33.57  
30.12

14.40  
14.38

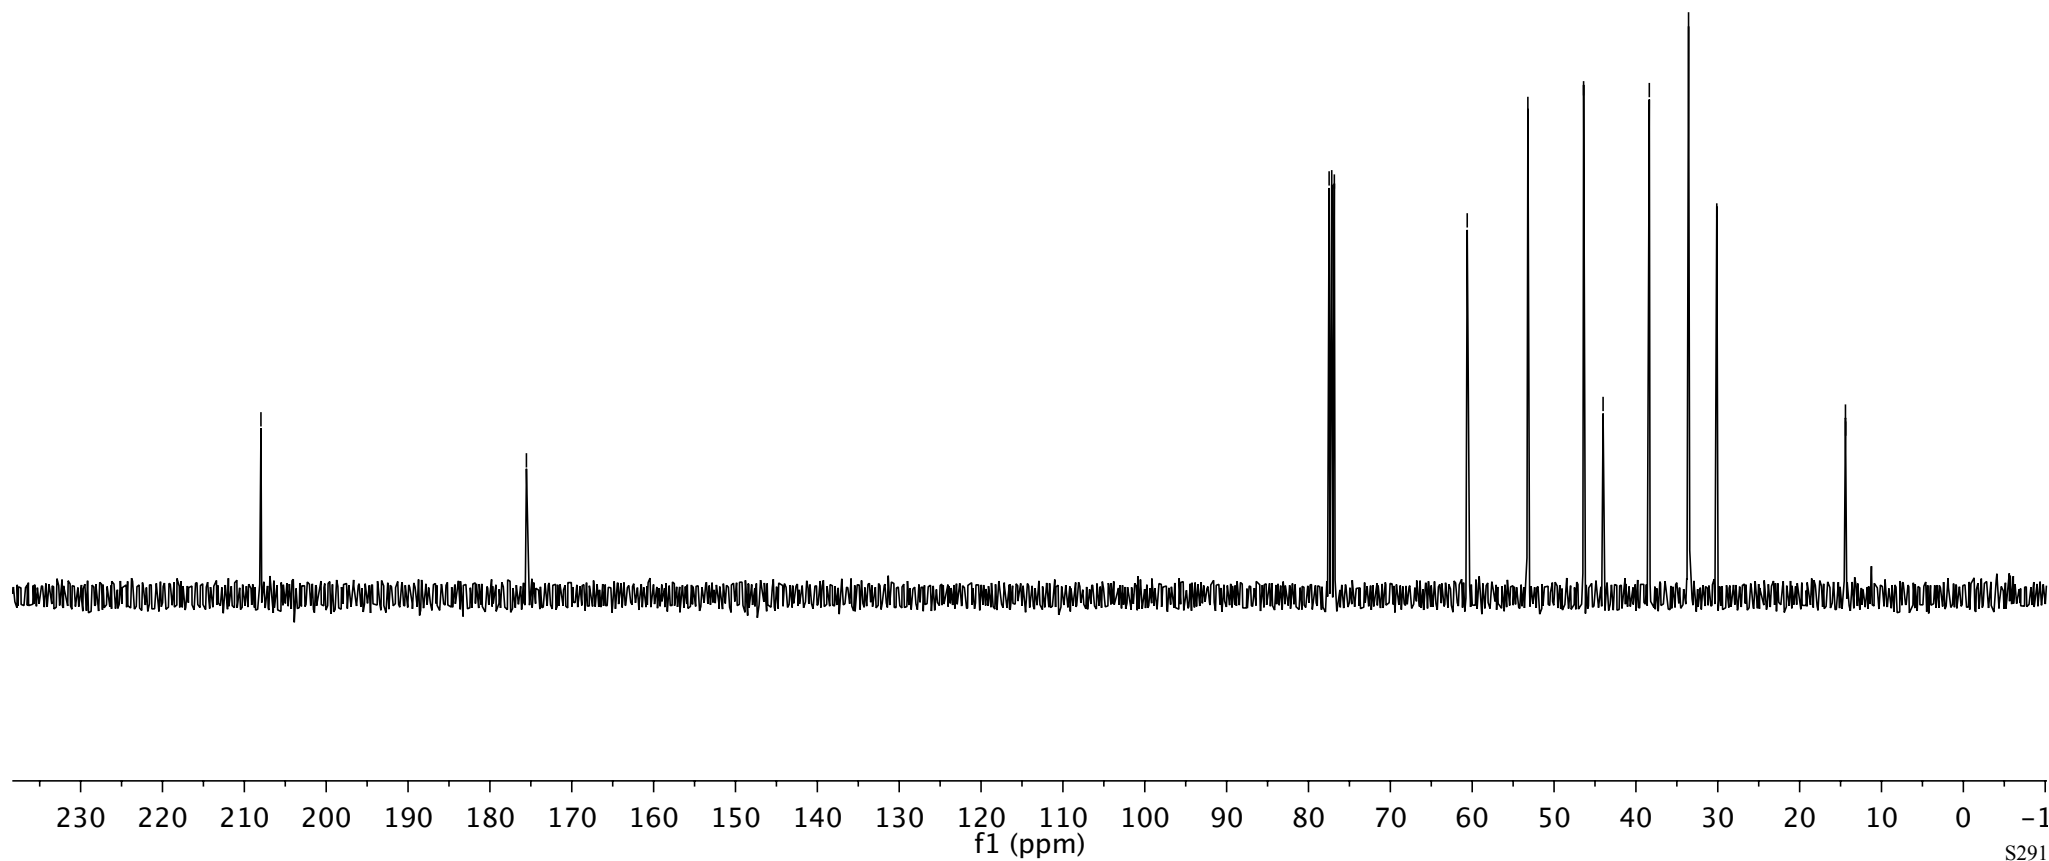

| Parameter              | Value        |
|------------------------|--------------|
| Origin                 | Varian       |
| Spectrometer           | inova        |
| Solvent                | CDCl3        |
| Temperature            | 20.0         |
| Pulse Sequence         | s2pul        |
| Experiment             | 1D           |
| Probe                  | hcn          |
| Number of Scans        | 16           |
| Receiver Gain          | 44           |
| Relaxation Delay       | 2.0000       |
| Pulse Width            | 0.0000       |
| Acquisition Time       | 4.0960       |
| Spectrometer Frequency | 500.07       |
| Spectral Width         | 8000.0       |
| Lowest Frequency       | -1521.1      |
| Nucleus                | $^1\text{H}$ |
| Acquired Size          | 32768        |
| Spectral Size          | 65536        |

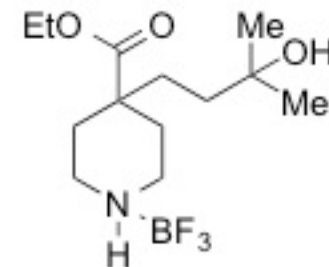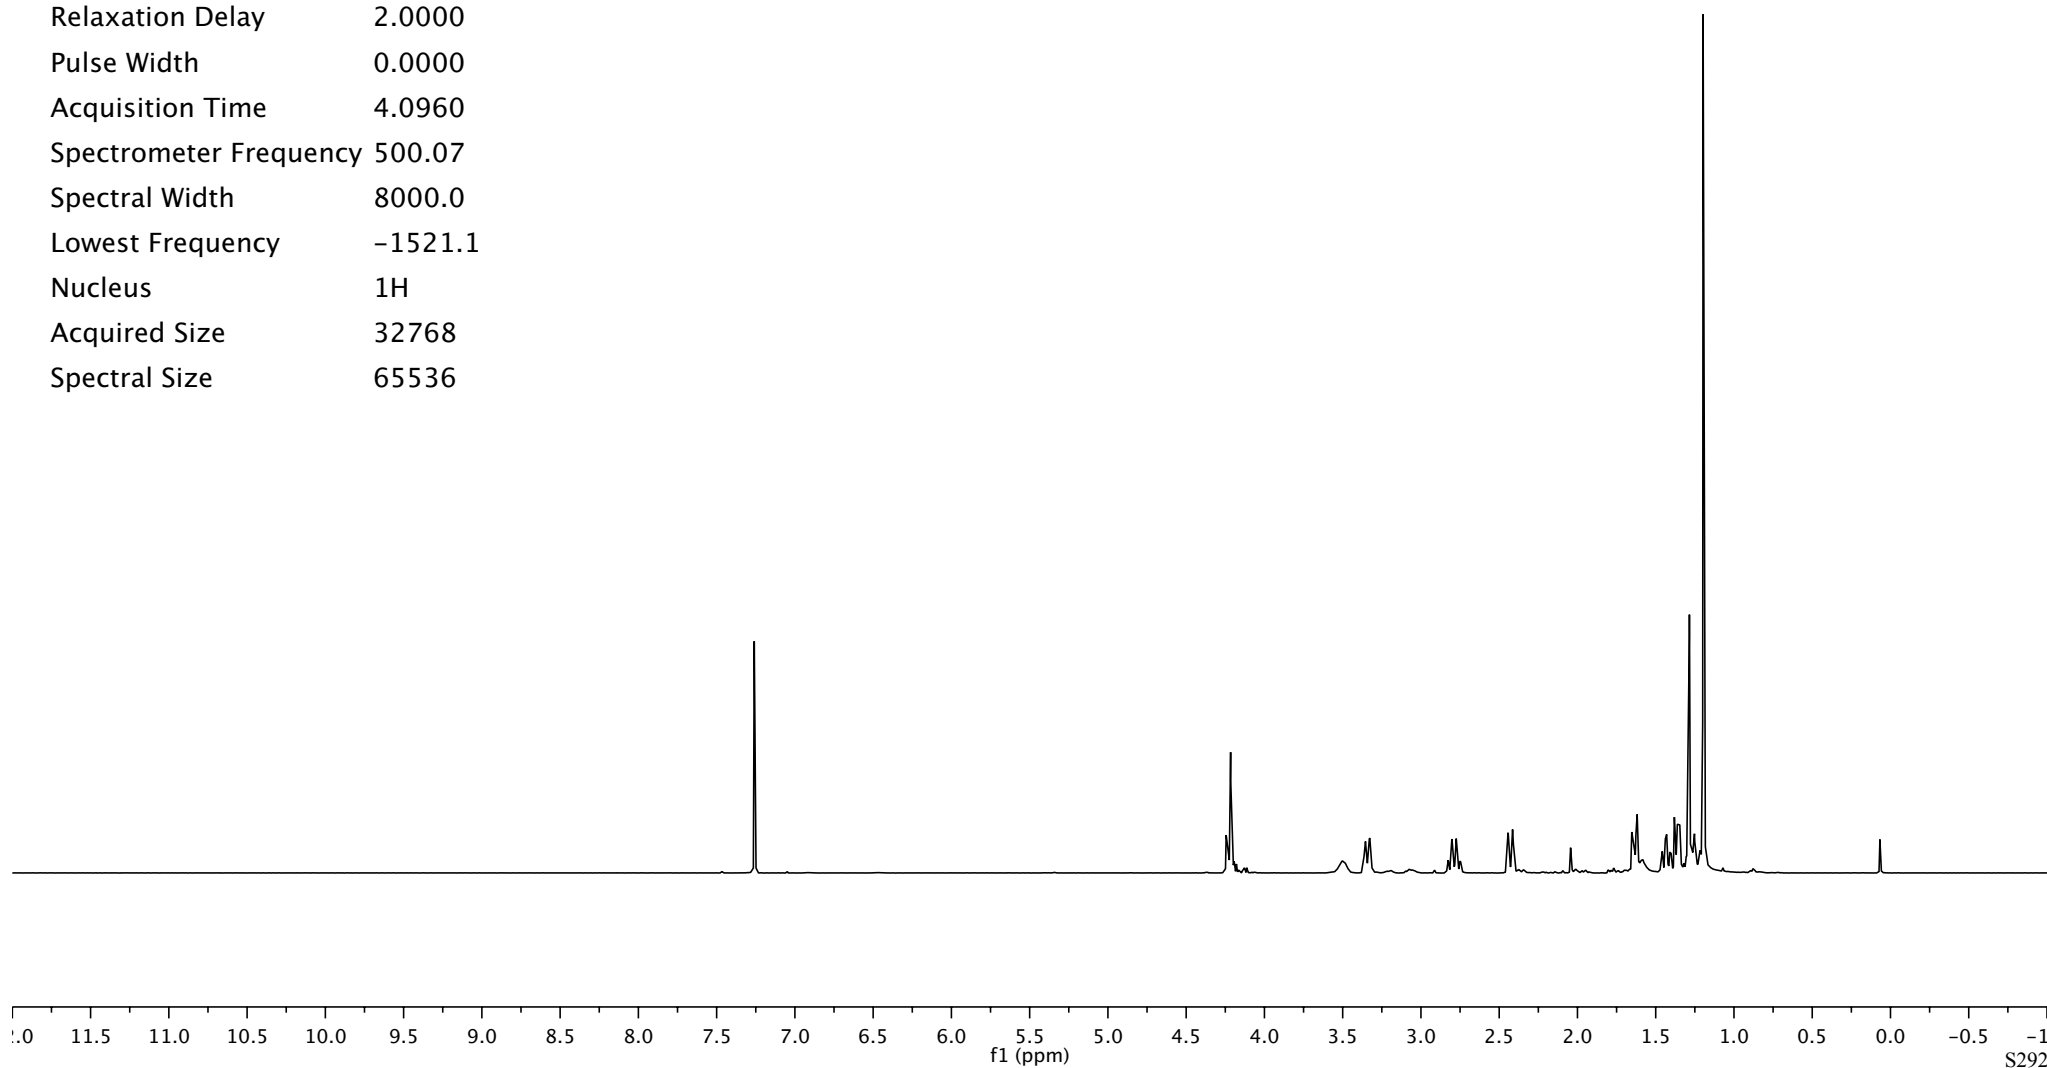

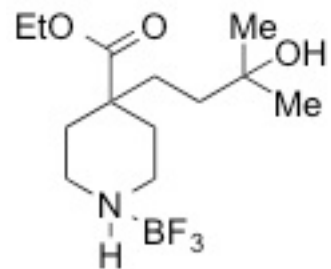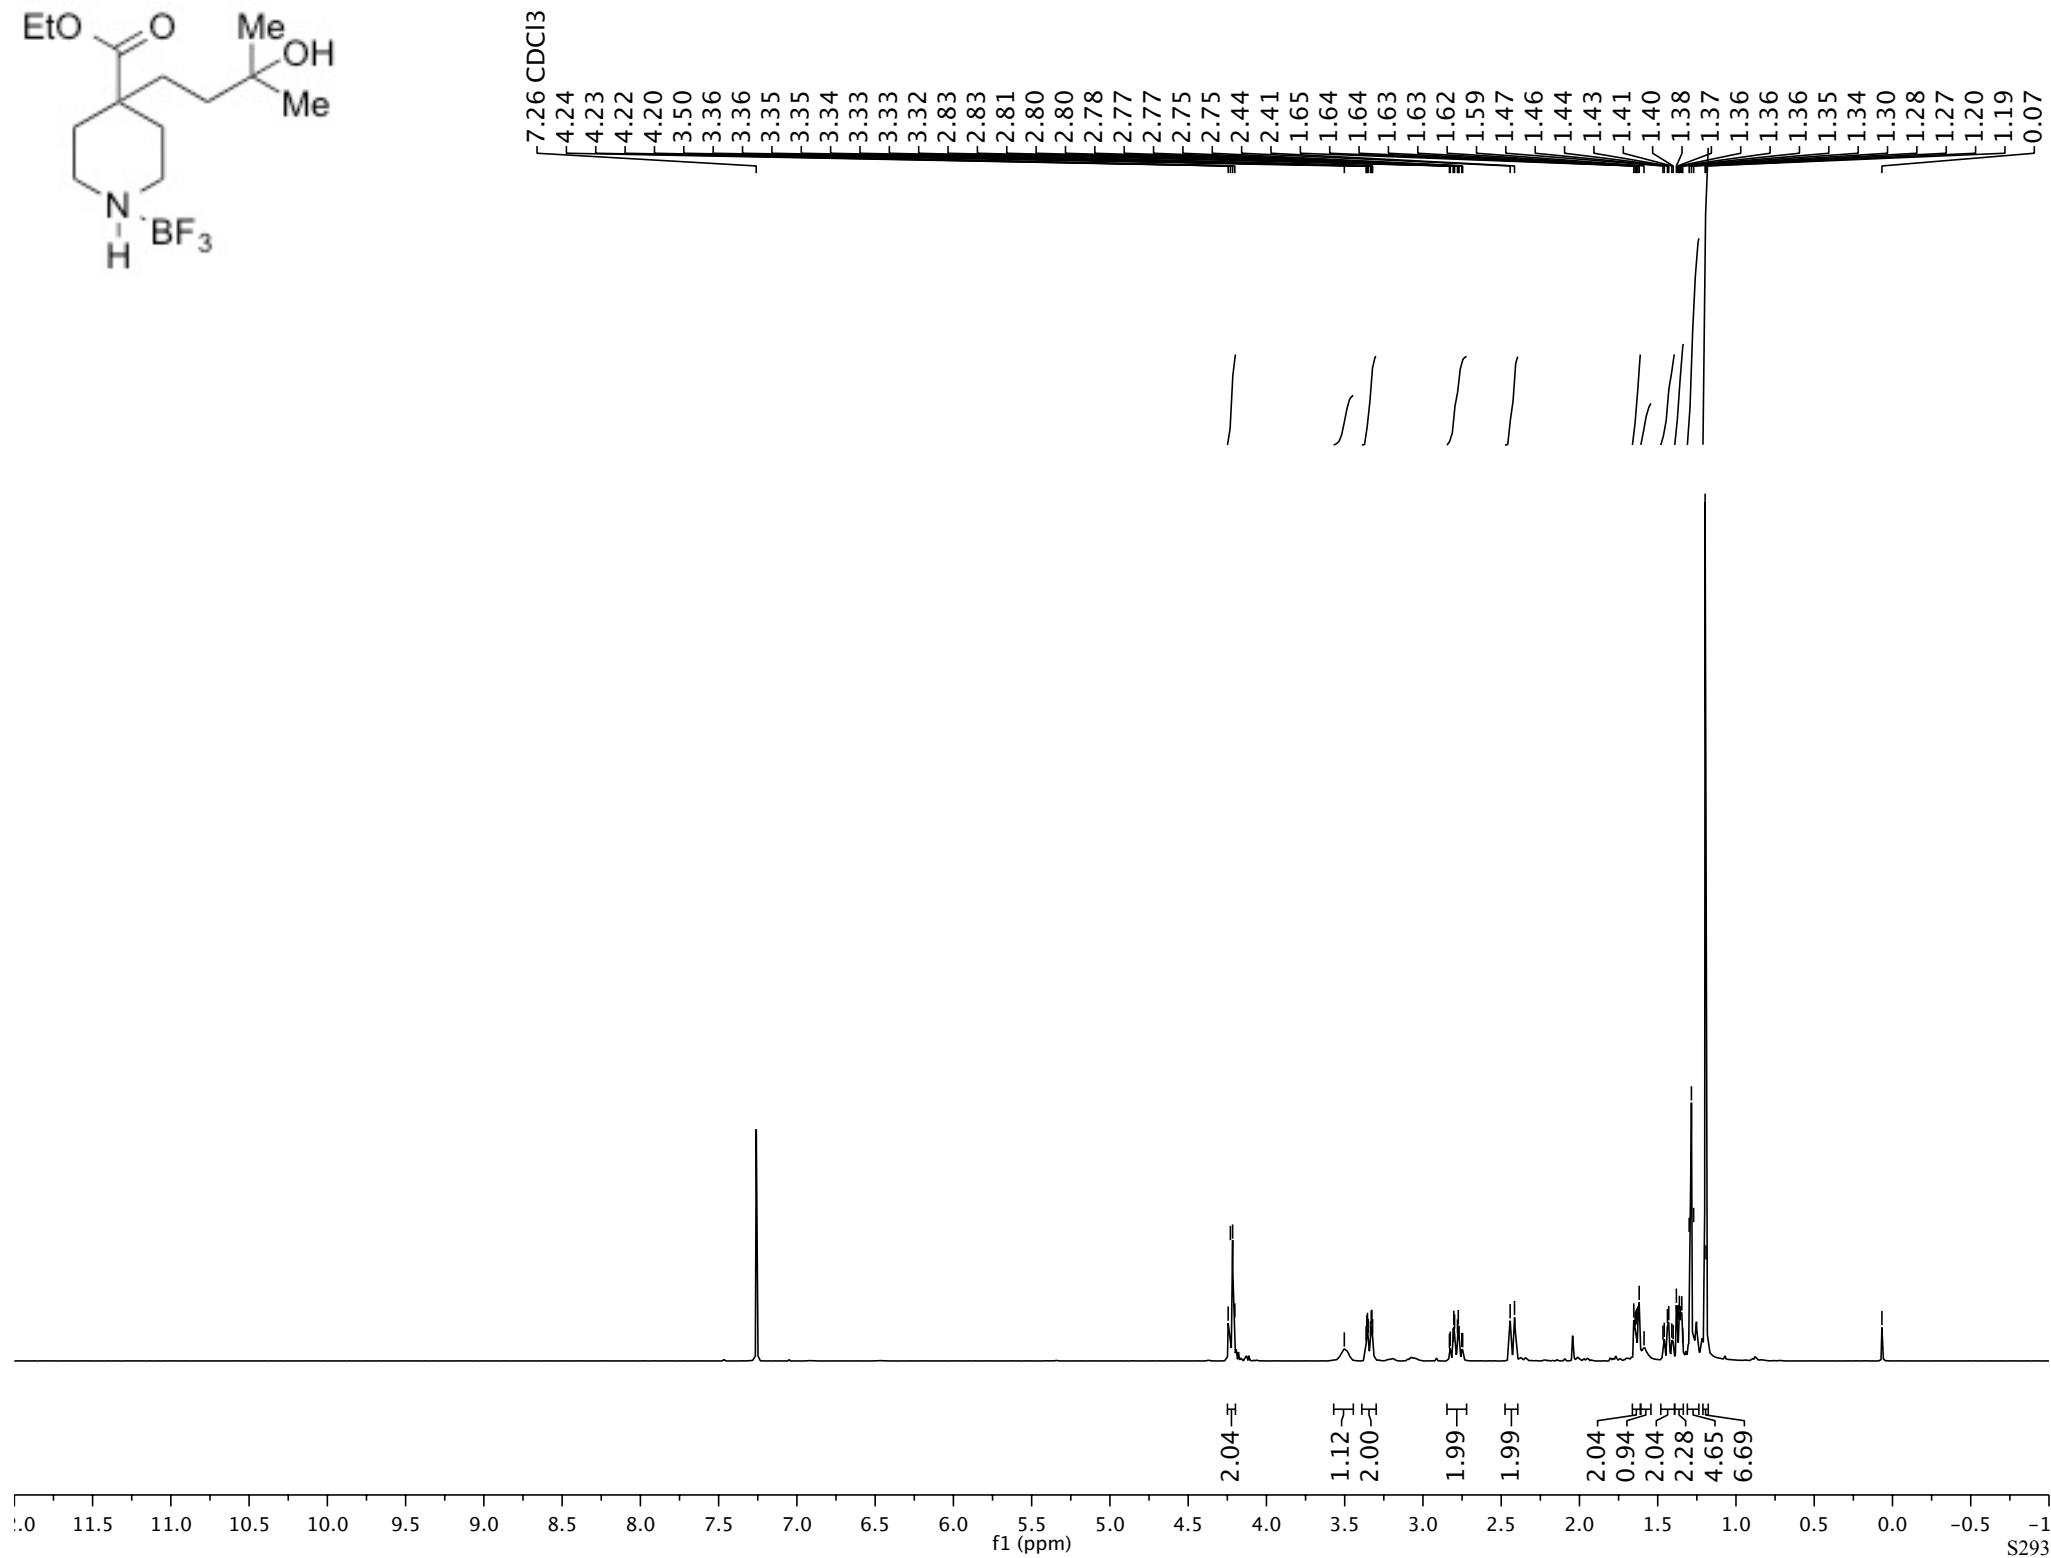

| Parameter              | Value           |
|------------------------|-----------------|
| Origin                 | Varian          |
| Spectrometer           | inova           |
| Solvent                | CDCl3           |
| Temperature            | 22.0            |
| Pulse Sequence         | s2pul           |
| Experiment             | 1D              |
| Probe                  | QUAD            |
| Number of Scans        | 64              |
| Receiver Gain          | 50              |
| Relaxation Delay       | 0.0000          |
| Pulse Width            | 0.0000          |
| Acquisition Time       | 0.3277          |
| Spectrometer Frequency | 470.15          |
| Spectral Width         | 100000.0        |
| Lowest Frequency       | -79501.3        |
| Nucleus                | <sup>19</sup> F |
| Acquired Size          | 32768           |
| Spectral Size          | 65536           |

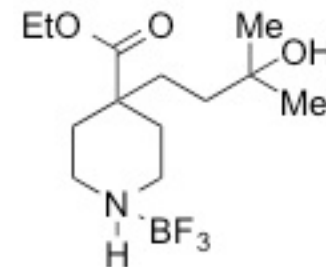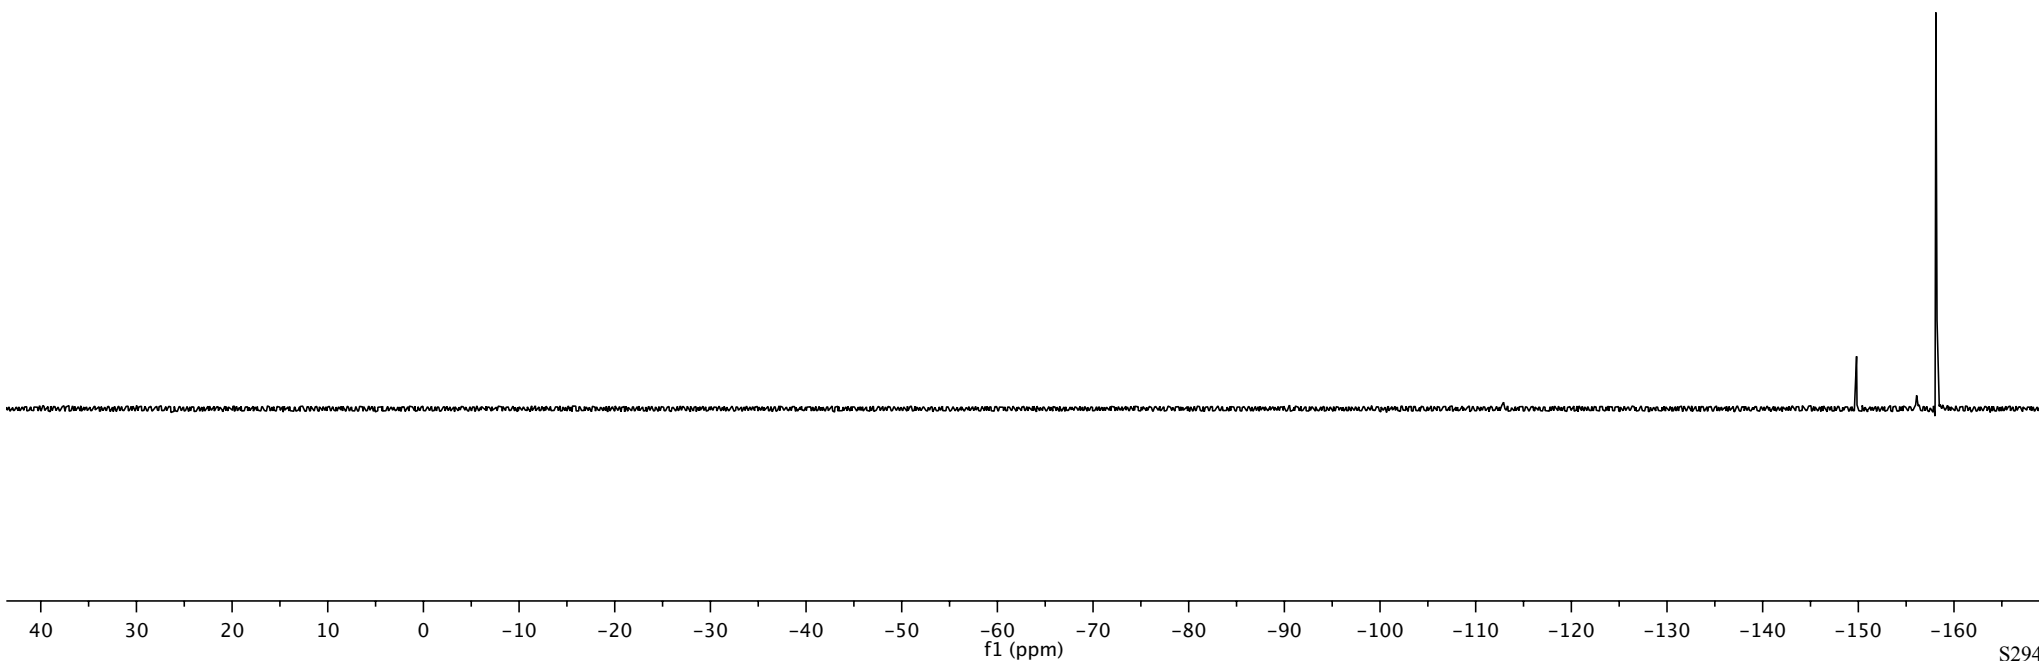

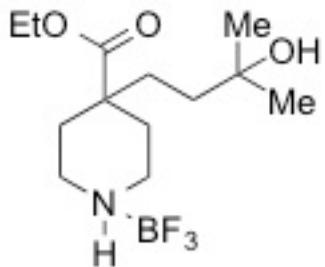

~158.11  
~158.14  
~158.18  
~158.21

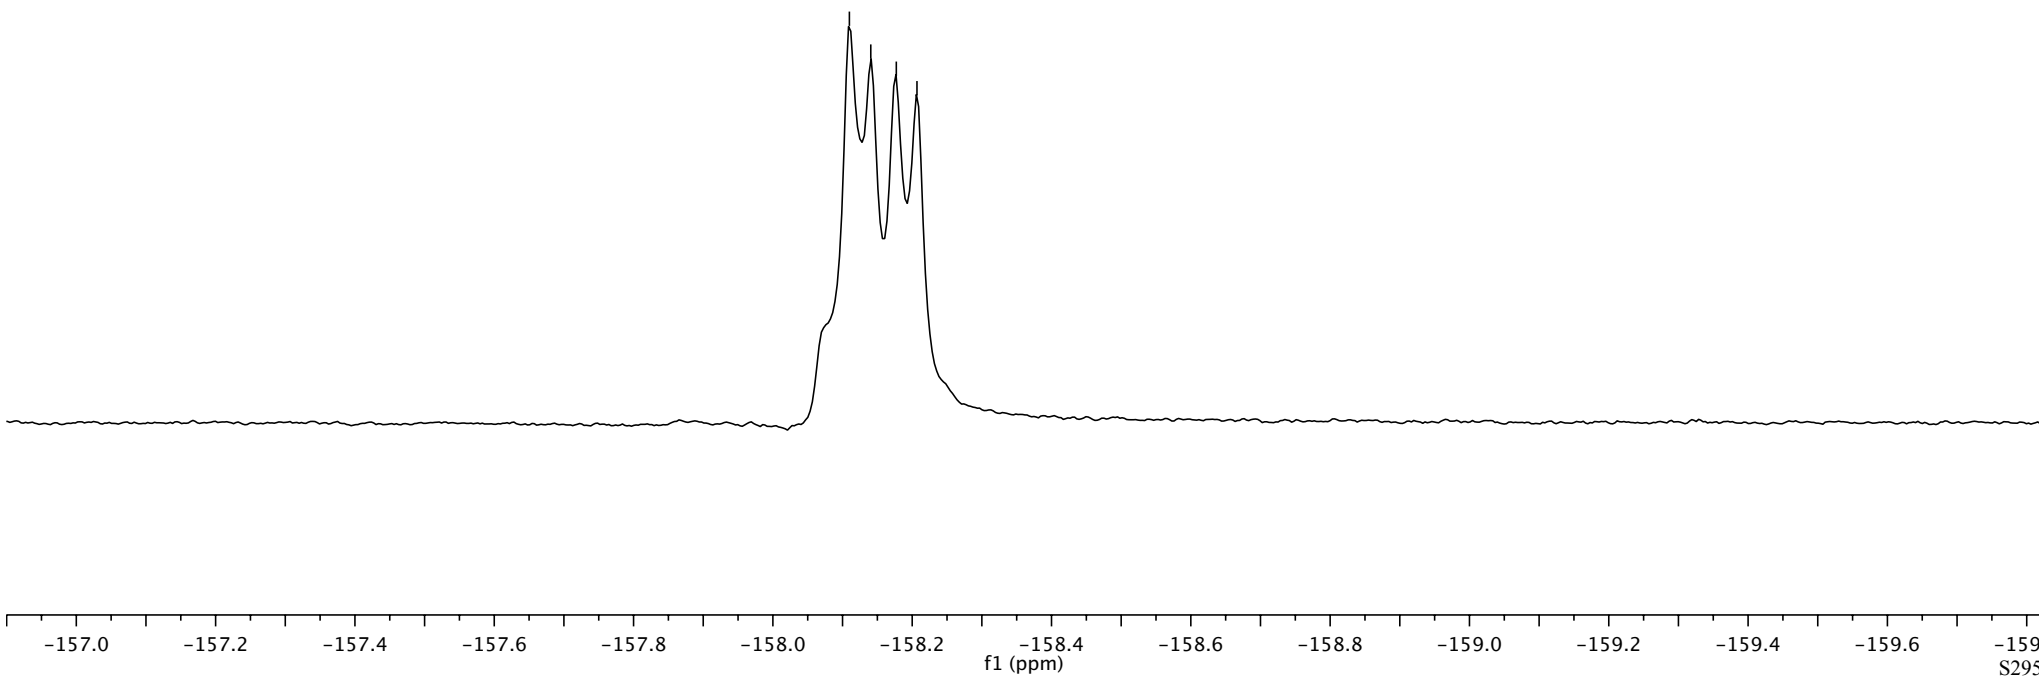



| Parameter              | Value             |
|------------------------|-------------------|
| Origin                 | Varian            |
| Spectrometer           | inova             |
| Solvent                | CDCl <sub>3</sub> |
| Temperature            | 22.0              |
| Pulse Sequence         | s2pul             |
| Experiment             | 1D                |
| Probe                  | QUAD              |
| Number of Scans        | 989               |
| Receiver Gain          | 60                |
| Relaxation Delay       | 2.0000            |
| Pulse Width            | 0.0000            |
| Acquisition Time       | 1.0863            |
| Spectrometer Frequency | 125.66            |
| Spectral Width         | 30165.9           |
| Lowest Frequency       | -1272.4           |
| Nucleus                | <sup>13</sup> C   |
| Acquired Size          | 32768             |
| Spectral Size          | 65536             |

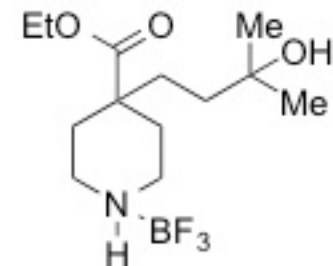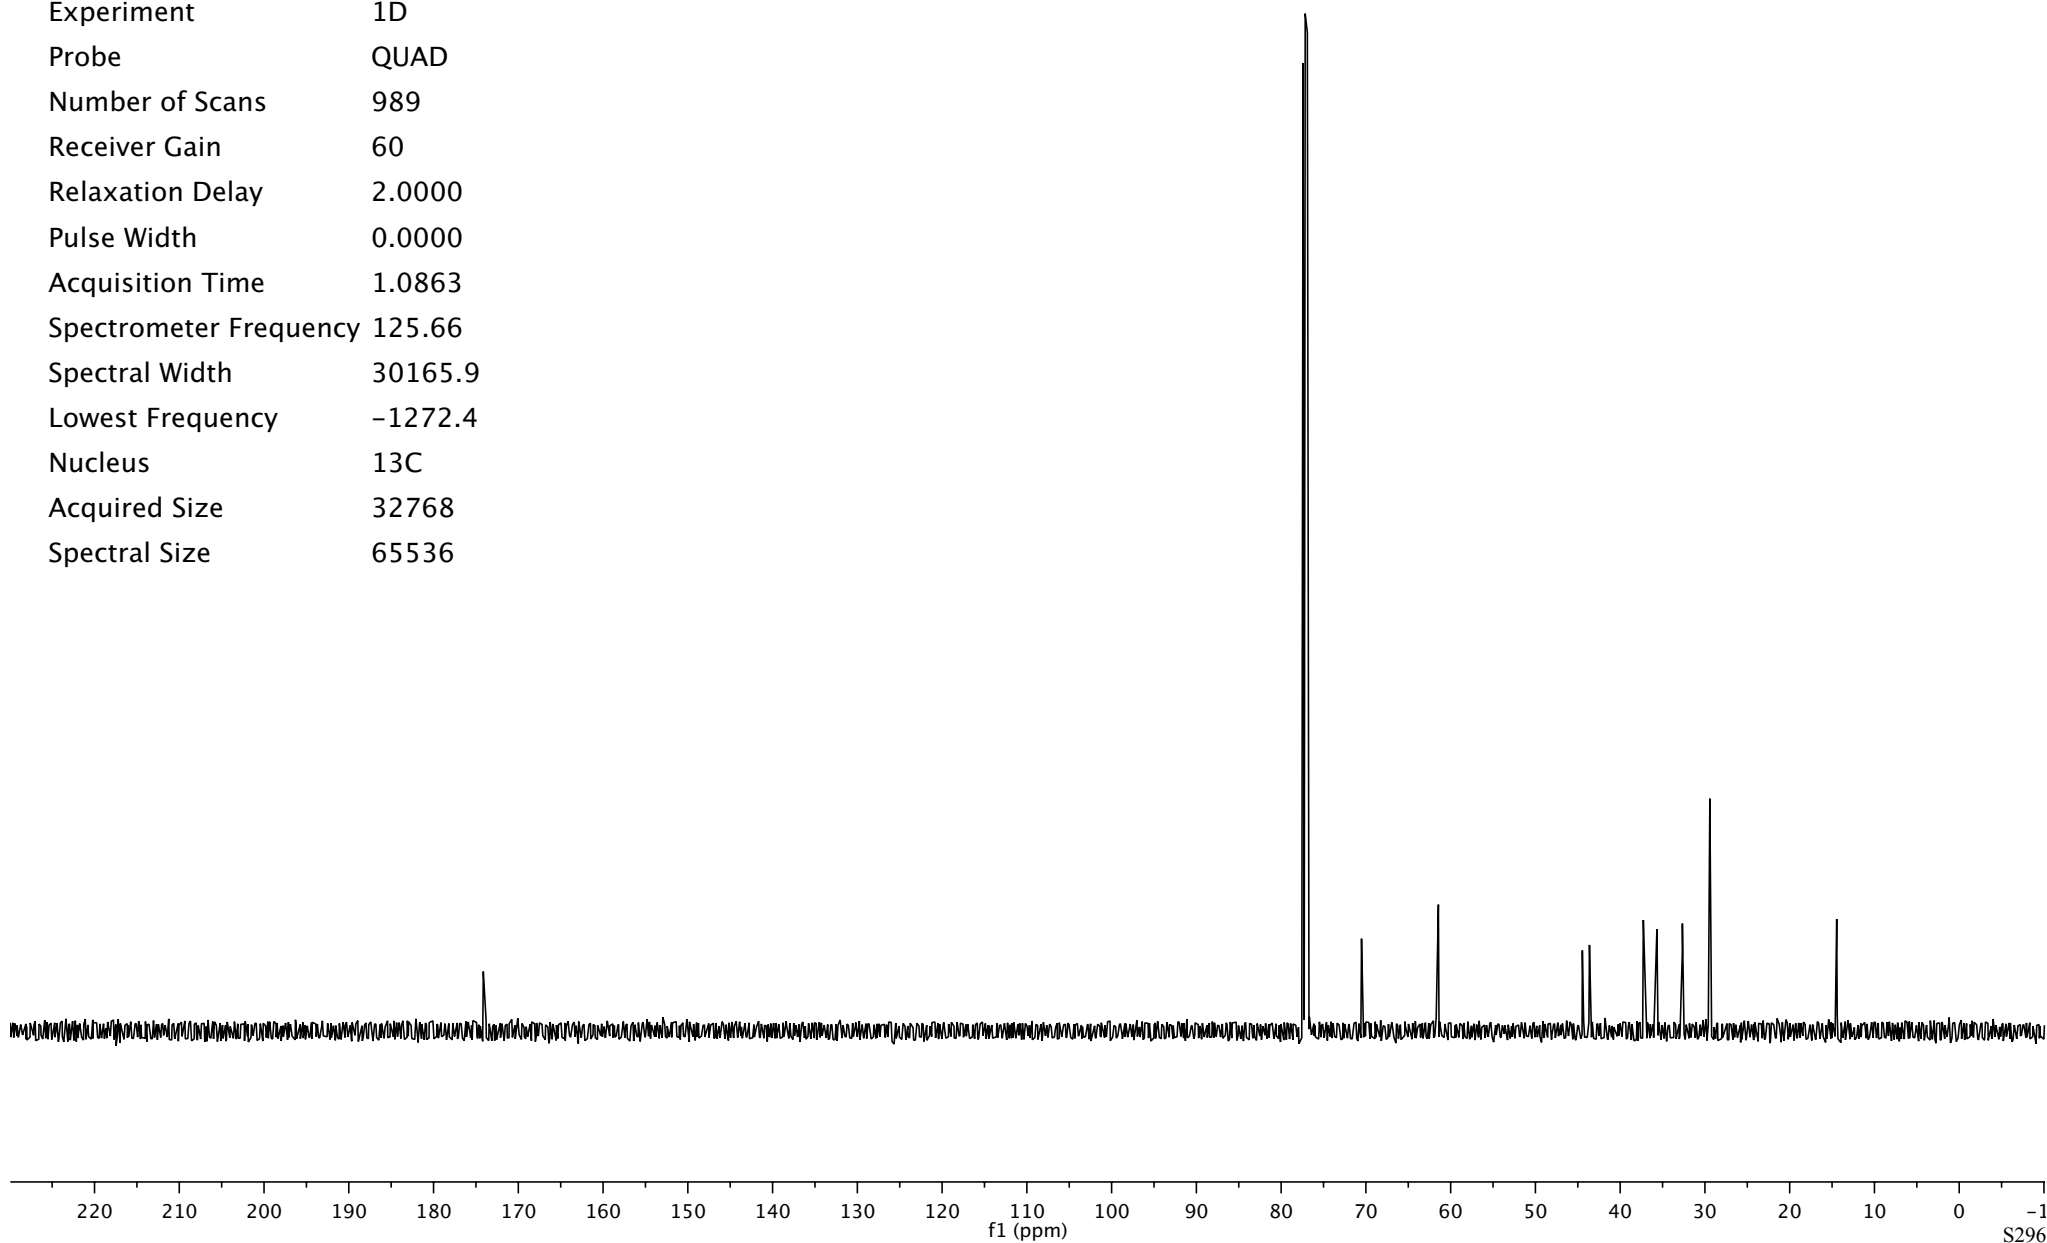

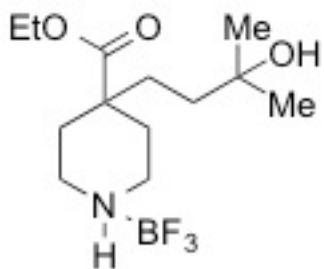

—174.13

—77.16 CDCl<sub>3</sub>

—70.52

—61.45

—44.46

—43.63

—37.27

—35.67

—32.66

—29.42

—14.45

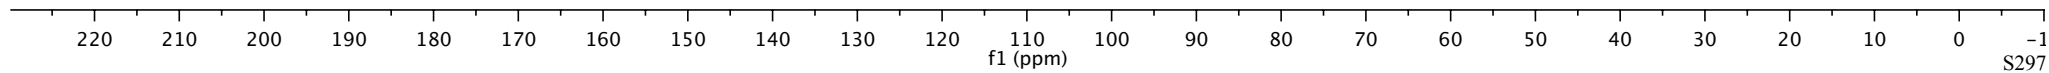

| Parameter              | Value              |
|------------------------|--------------------|
| Origin                 | Varian             |
| Spectrometer           | inova              |
| Solvent                | CD <sub>3</sub> CN |
| Temperature            | 20.0               |
| Pulse Sequence         | s2pul              |
| Experiment             | 1D                 |
| Probe                  | QUADG              |
| Number of Scans        | 8                  |
| Receiver Gain          | 44                 |
| Relaxation Delay       | 0.0000             |
| Pulse Width            | 0.0000             |
| Acquisition Time       | 4.0960             |
| Spectrometer Frequency | 499.44             |
| Spectral Width         | 8000.0             |
| Lowest Frequency       | -1520.7            |
| Nucleus                | <sup>1</sup> H     |
| Acquired Size          | 32768              |
| Spectral Size          | 65536              |

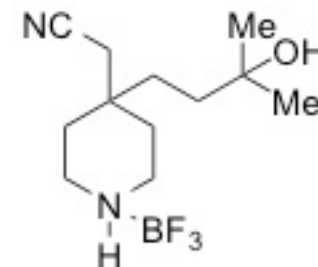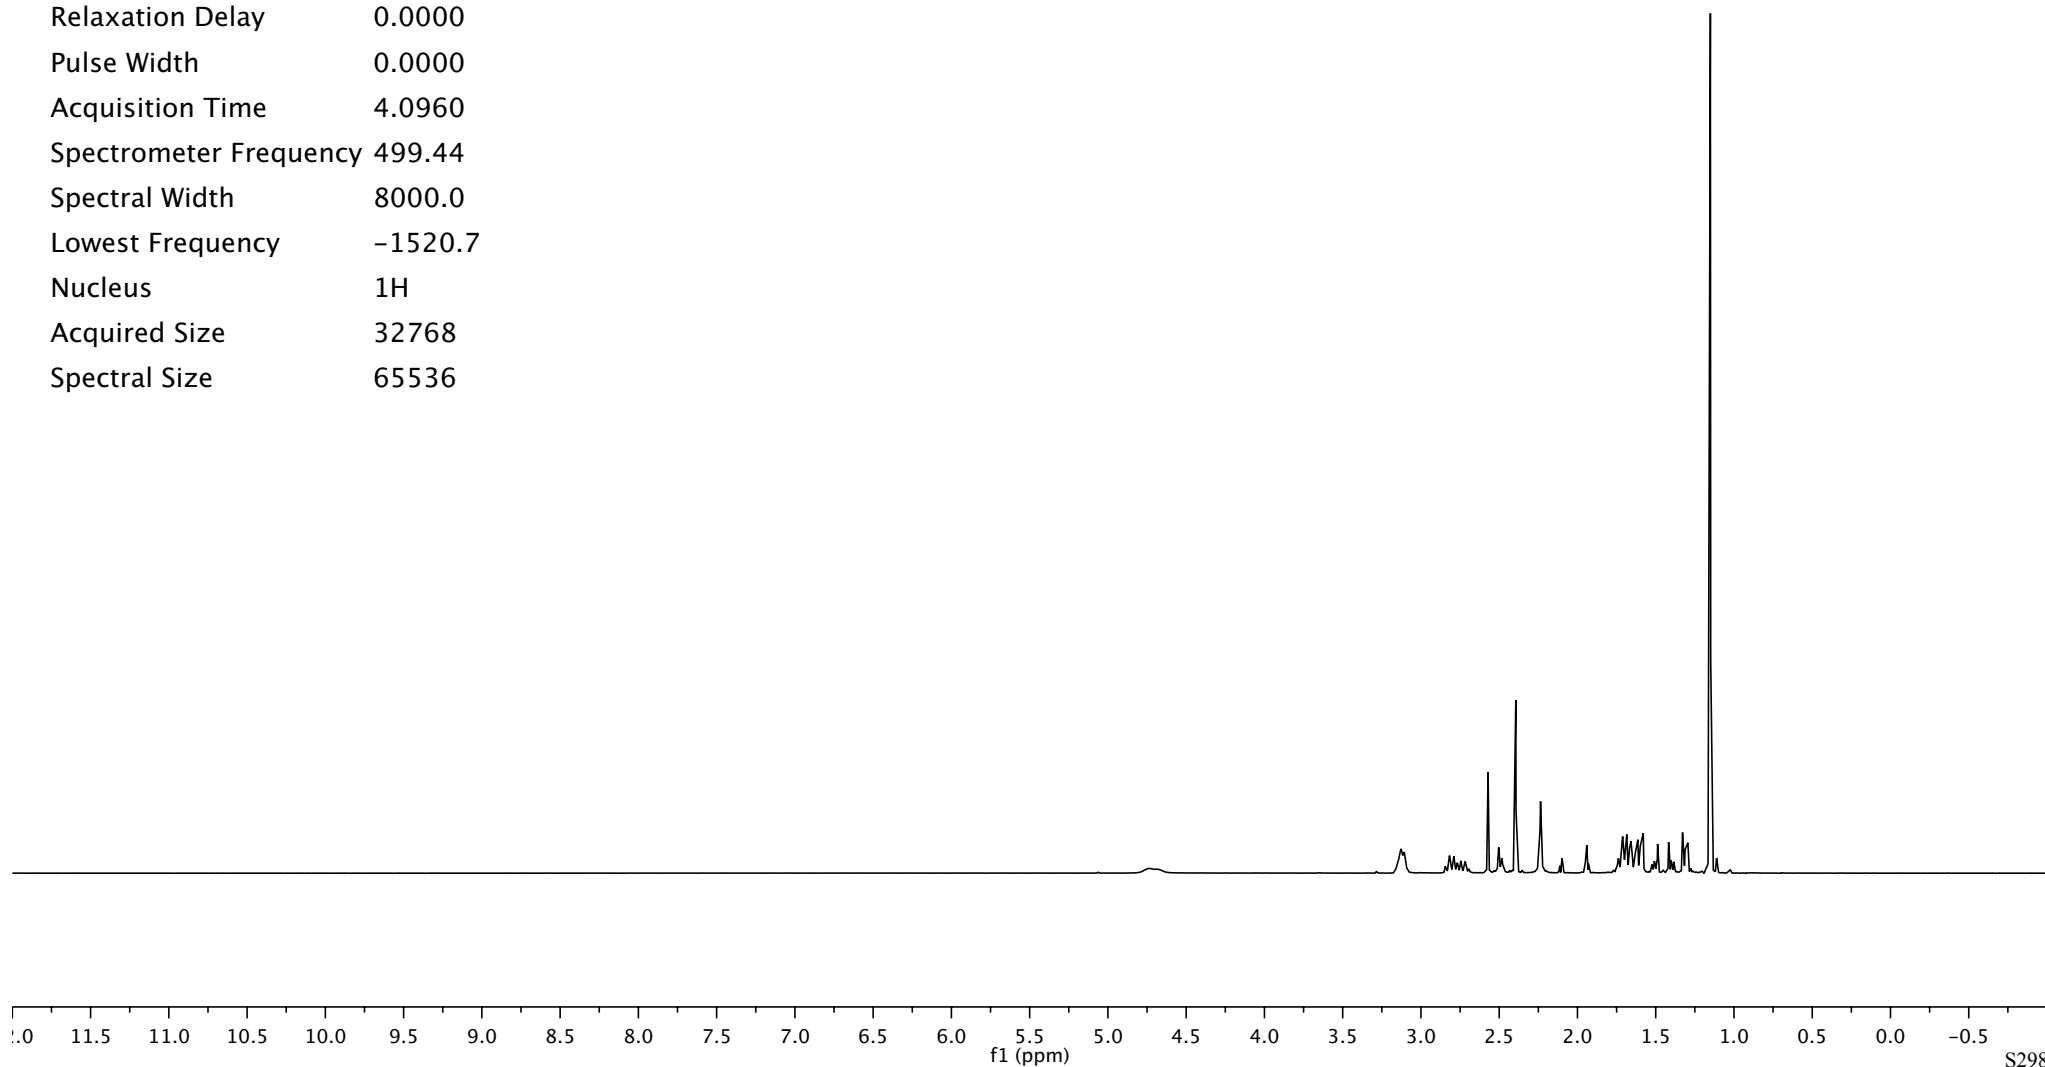

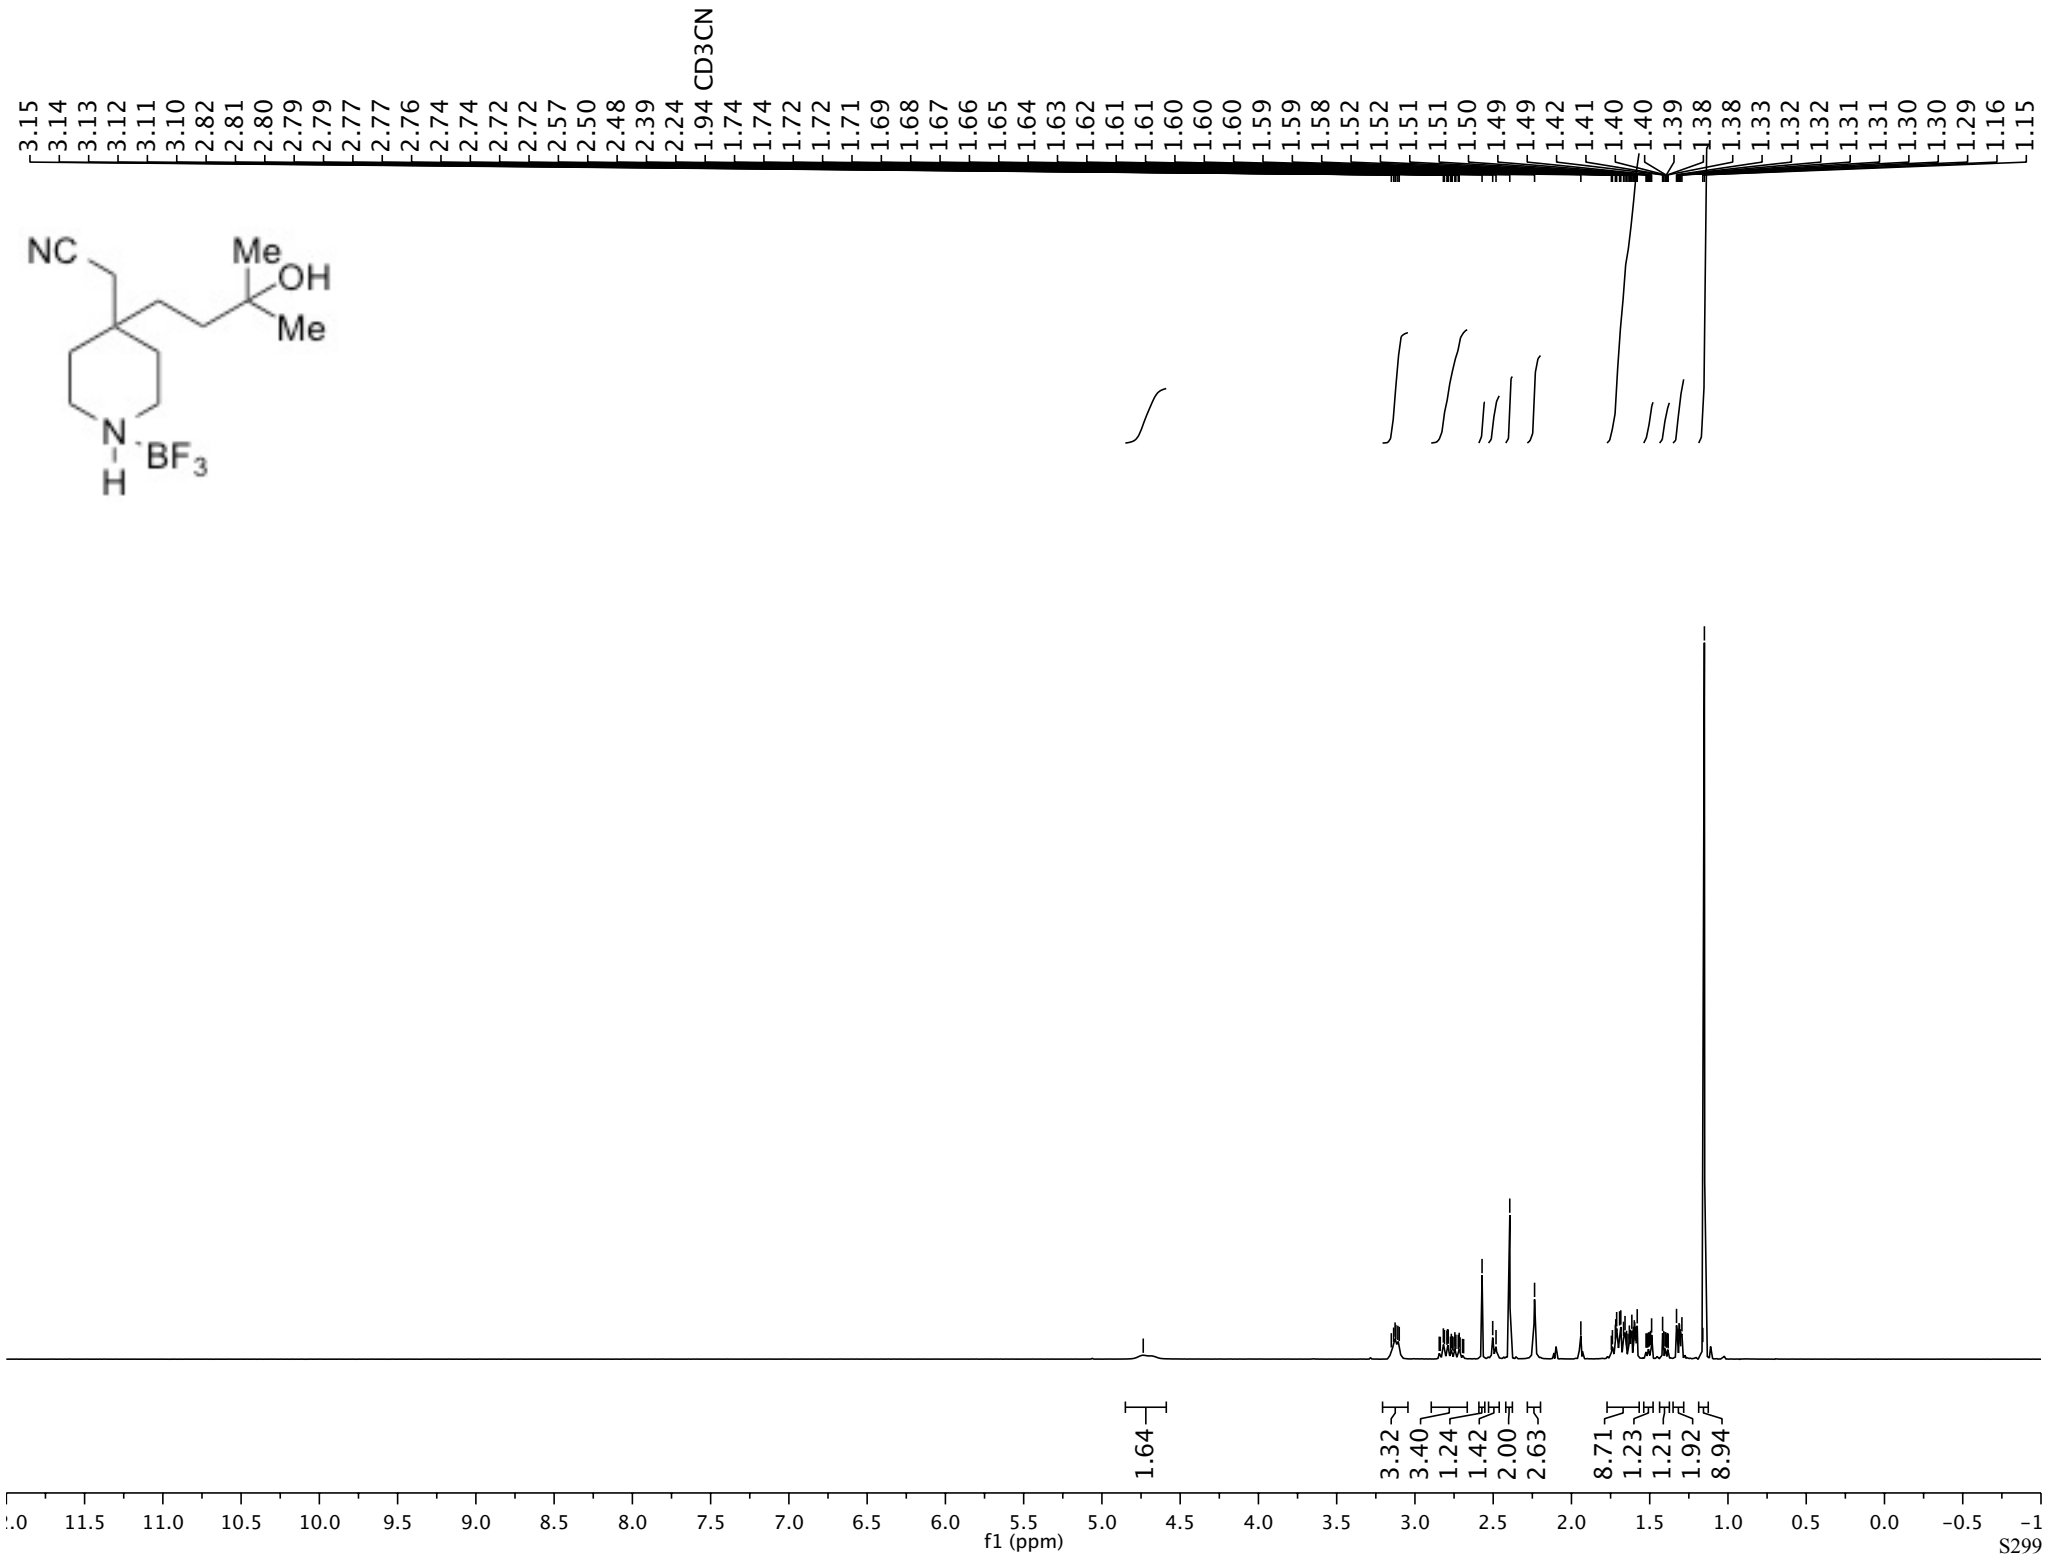

| Parameter              | Value              |
|------------------------|--------------------|
| Origin                 | Varian             |
| Spectrometer           | inova              |
| Solvent                | CD <sub>3</sub> CN |
| Temperature            | 20.0               |
| Pulse Sequence         | s2pul              |
| Experiment             | 1D                 |
| Probe                  | QUADG              |
| Number of Scans        | 928                |
| Receiver Gain          | 60                 |
| Relaxation Delay       | 1.0000             |
| Pulse Width            | 0.0000             |
| Acquisition Time       | 1.0240             |
| Spectrometer Frequency | 125.60             |
| Spectral Width         | 32000.0            |
| Lowest Frequency       | -2100.4            |
| Nucleus                | <sup>13</sup> C    |
| Acquired Size          | 32768              |
| Spectral Size          | 65536              |

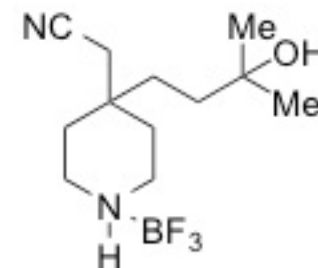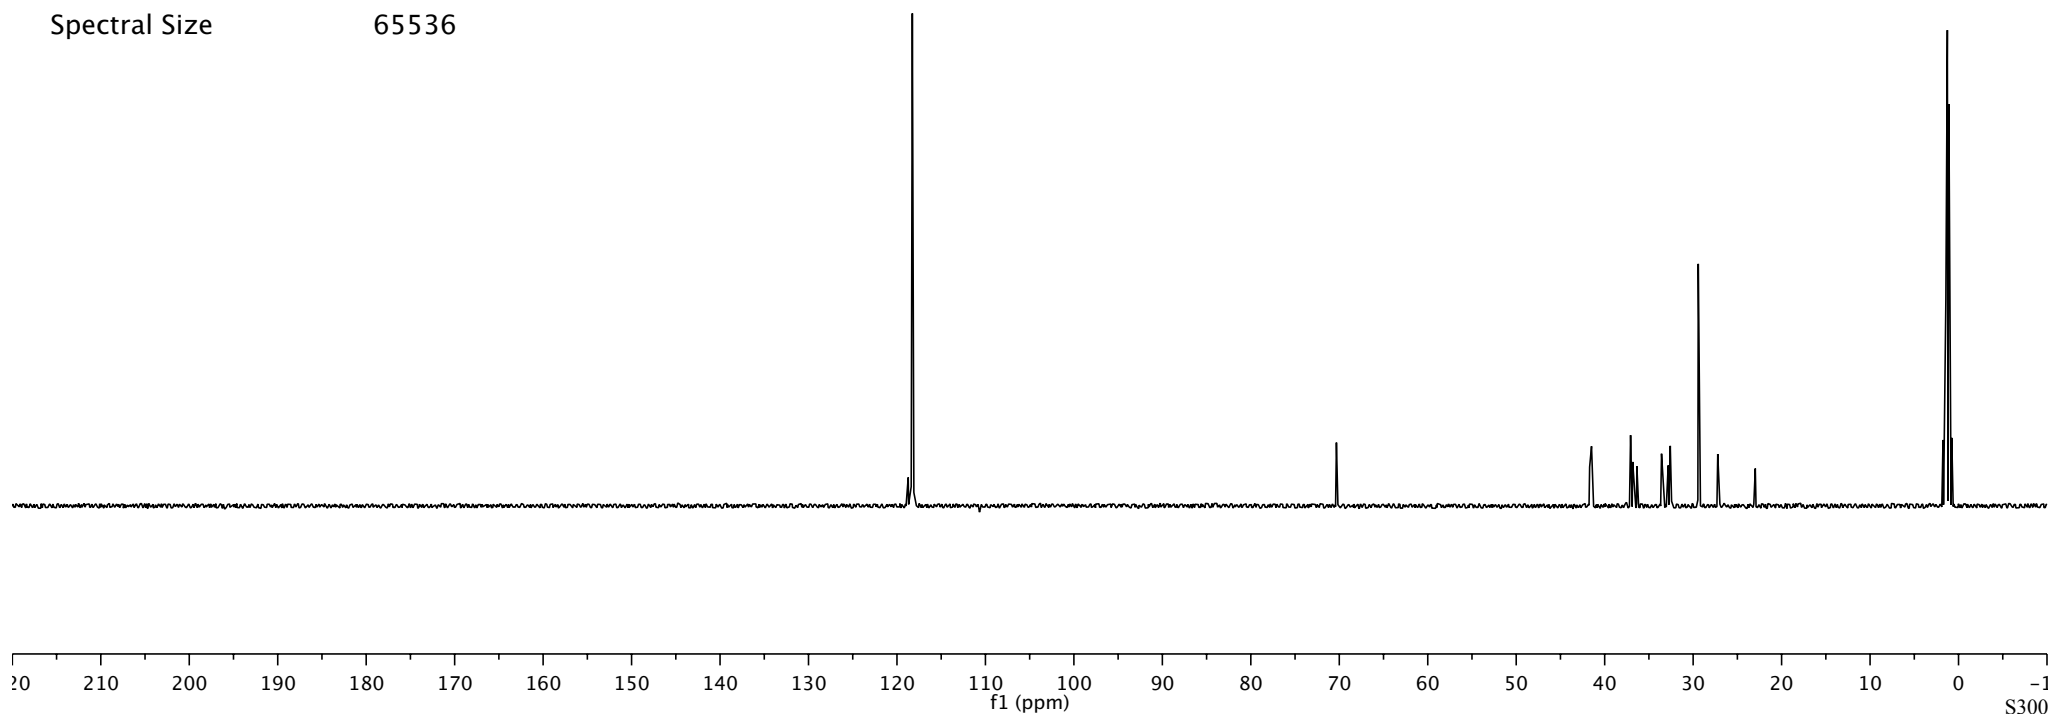

118.81  
118.73  
118.26 CD<sub>3</sub>CN

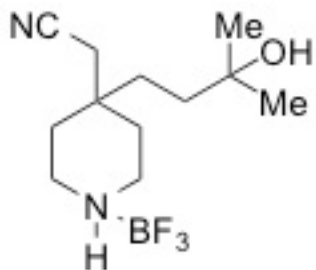

70.32  
70.30

41.70  
41.49  
37.07  
36.83  
36.36  
33.57  
33.51  
32.82  
32.58  
29.42  
29.25  
27.22  
-22.97

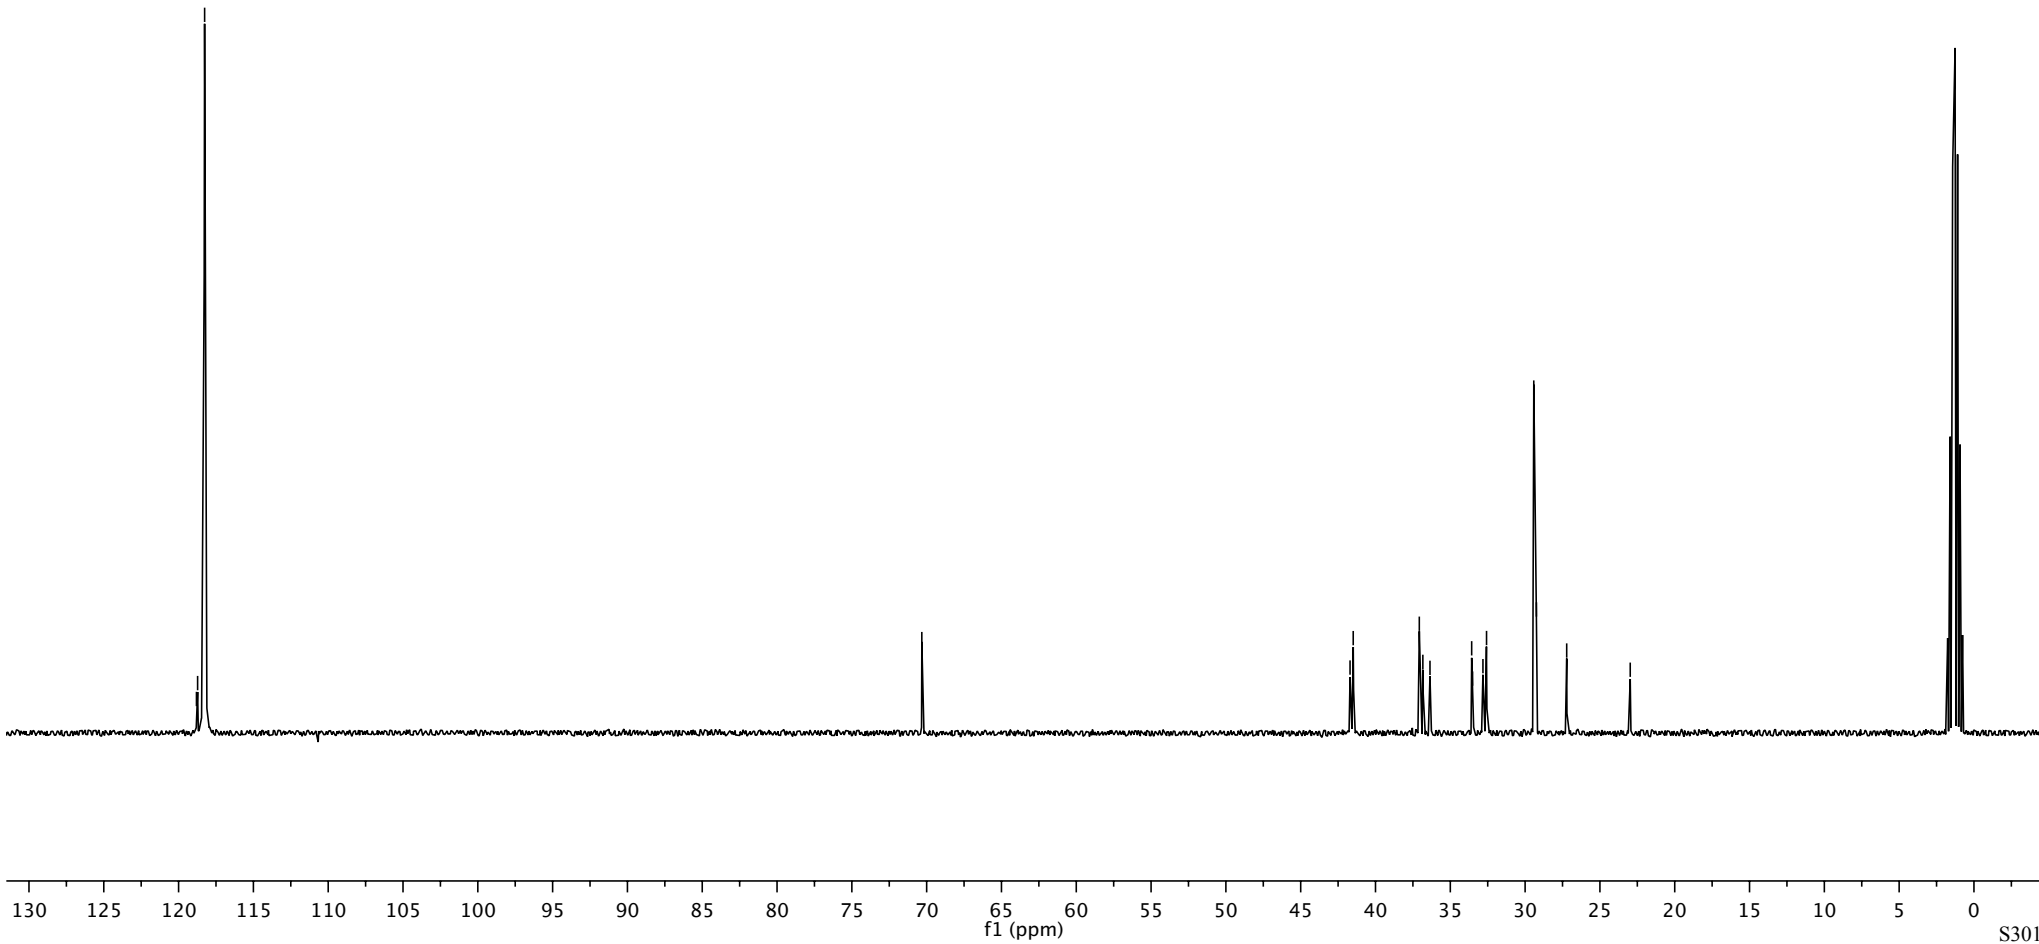

| Parameter              | Value           |
|------------------------|-----------------|
| Origin                 | Varian          |
| Spectrometer           | inova           |
| Solvent                | CDCl3           |
| Temperature            | 25.0            |
| Pulse Sequence         | s2pul           |
| Experiment             | 1D              |
| Probe                  | QUAD            |
| Number of Scans        | 64              |
| Receiver Gain          | 60              |
| Relaxation Delay       | 0.0000          |
| Pulse Width            | 0.0000          |
| Acquisition Time       | 0.3277          |
| Spectrometer Frequency | 470.15          |
| Spectral Width         | 100000.0        |
| Lowest Frequency       | -79501.3        |
| Nucleus                | <sup>19</sup> F |
| Acquired Size          | 32768           |
| Spectral Size          | 65536           |

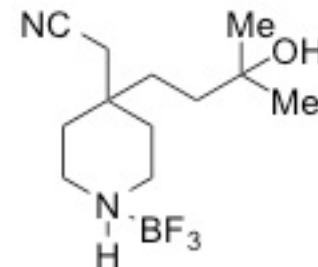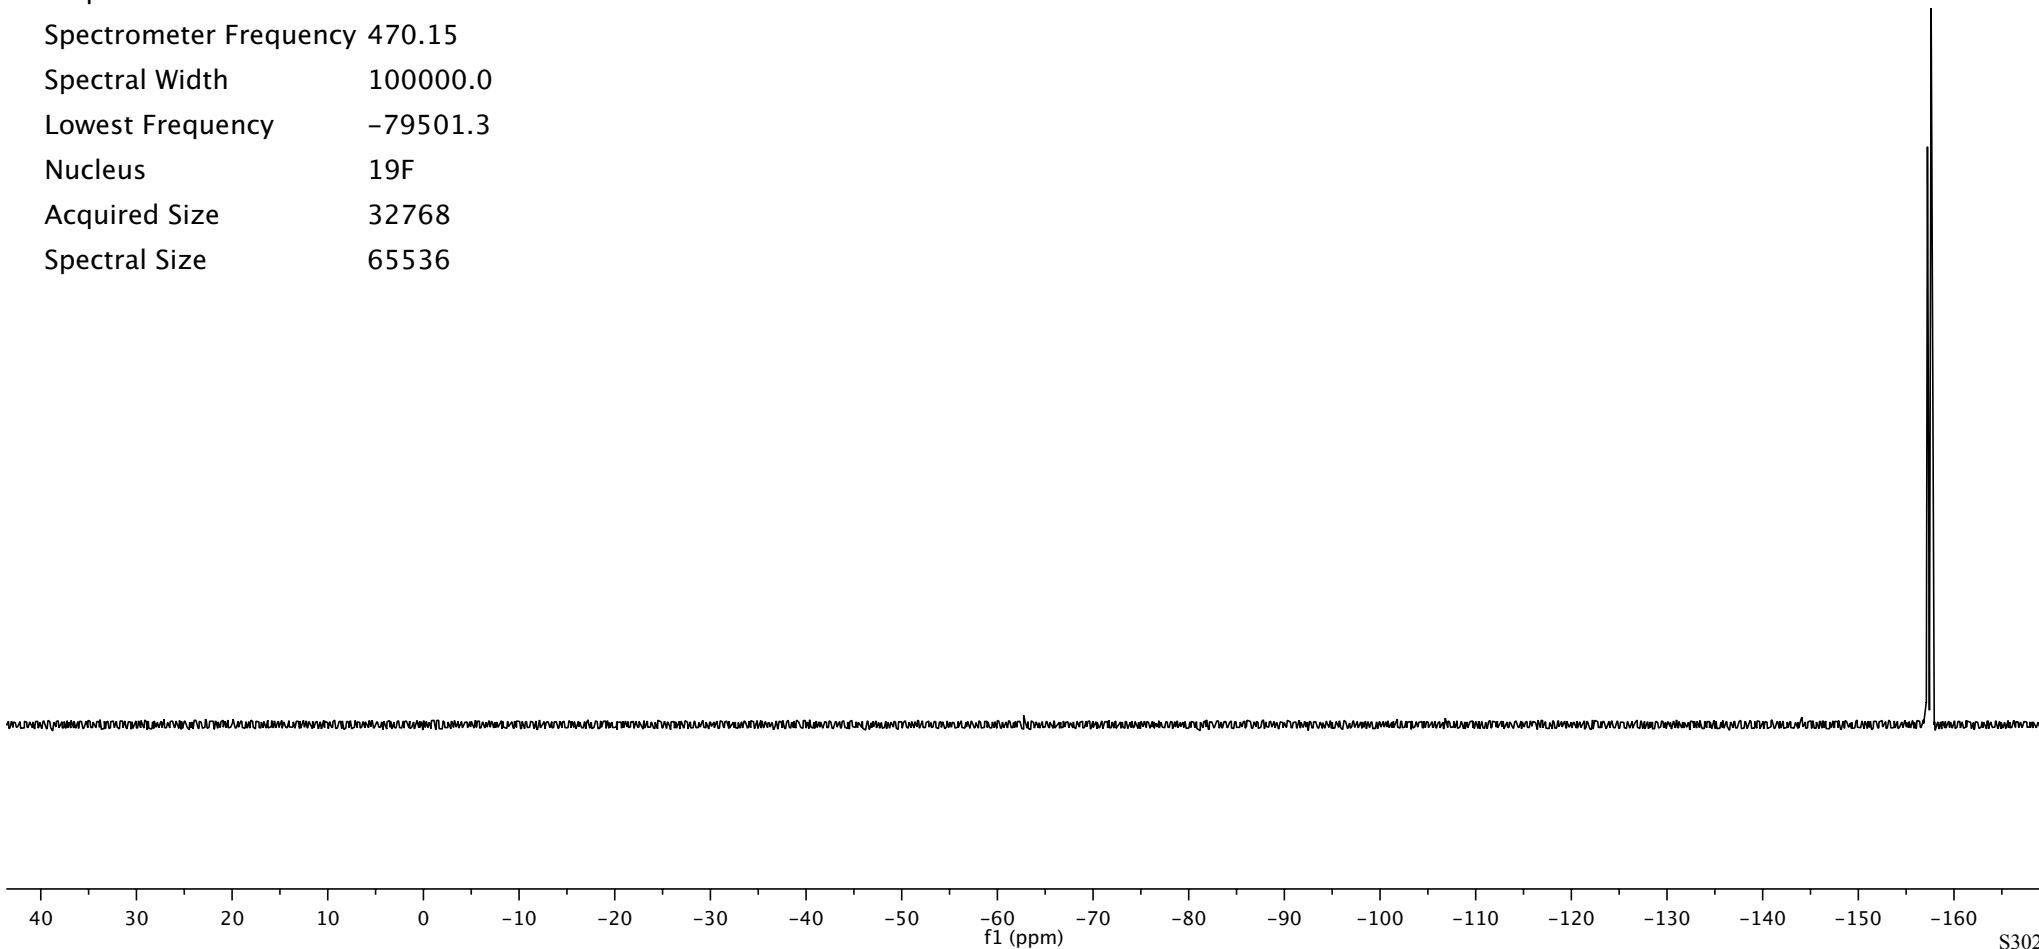

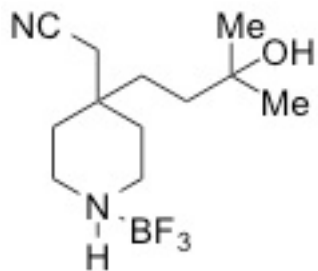

157.23  
157.23  
157.26  
157.29  
157.32

157.61  
157.64  
157.68  
157.71

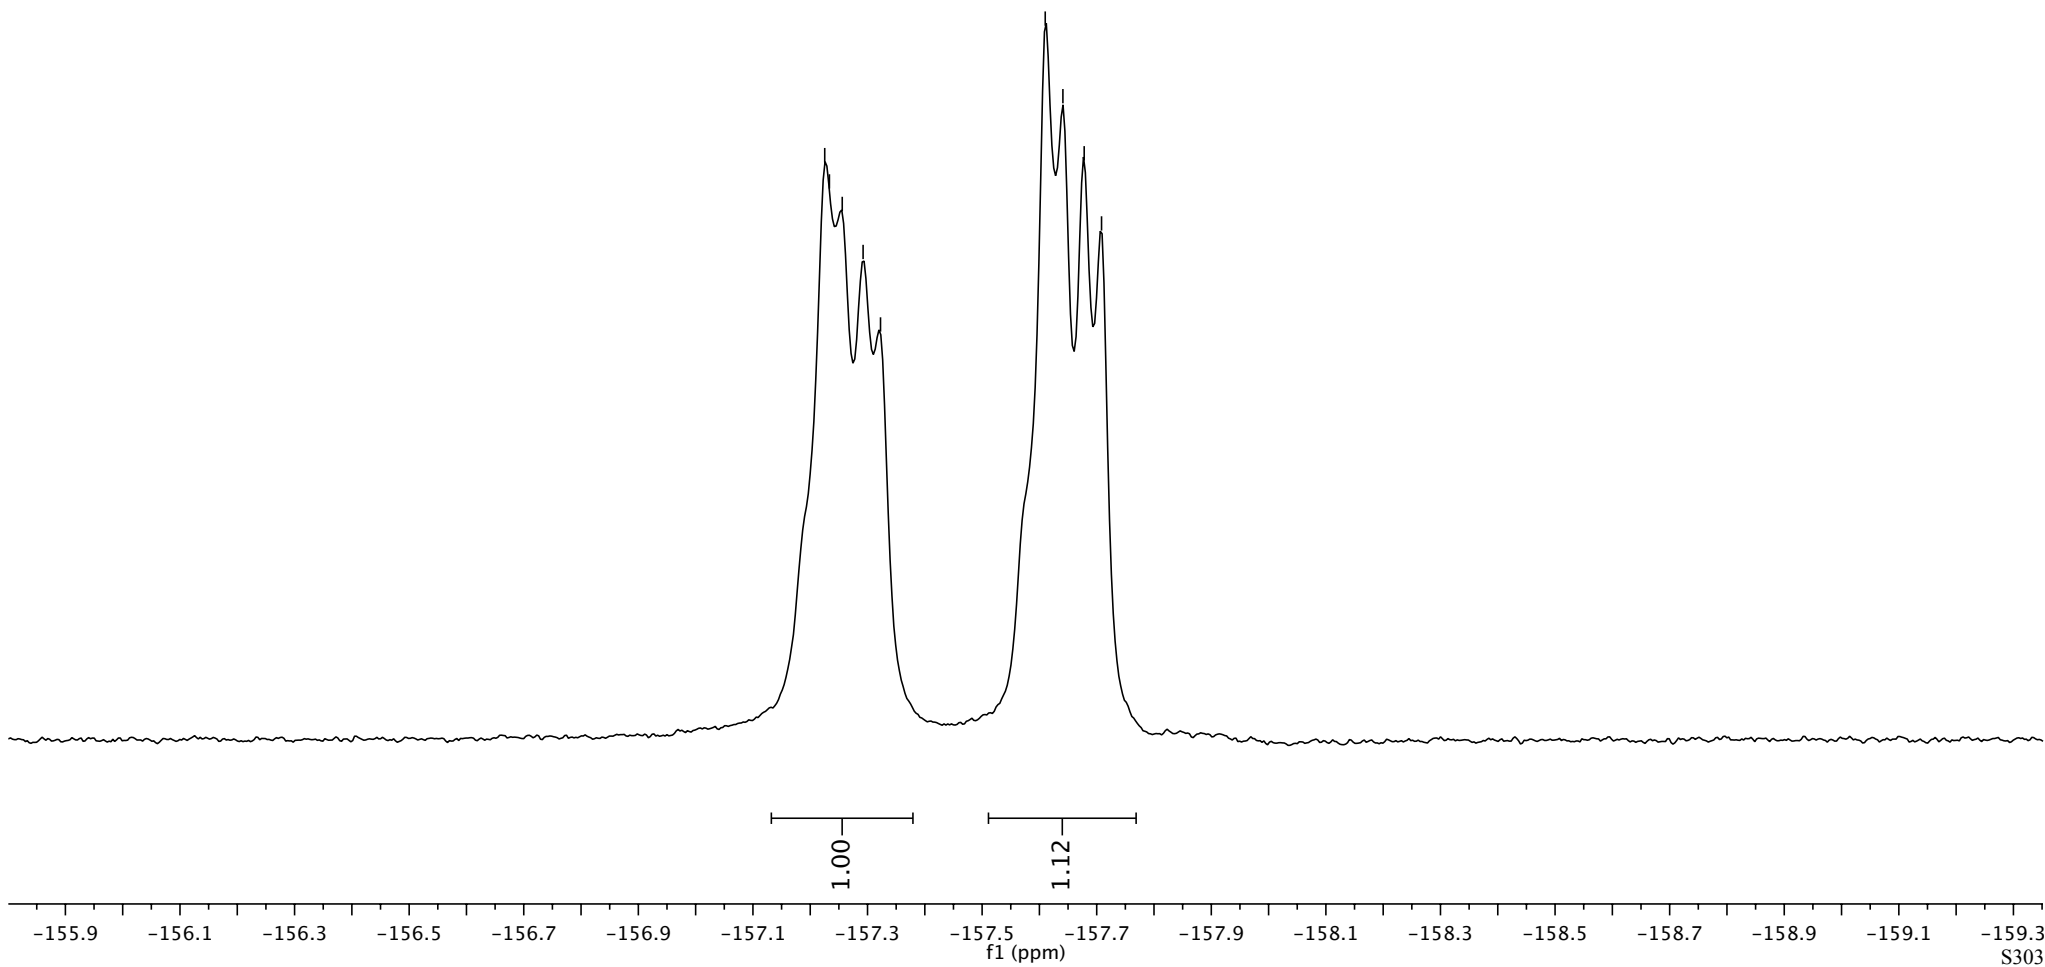



| Parameter              | Value   |
|------------------------|---------|
| Origin                 | Varian  |
| Spectrometer           | inova   |
| Solvent                | CDCl3   |
| Temperature            | 20.0    |
| Pulse Sequence         | s2pul   |
| Experiment             | 1D      |
| Probe                  | hcn     |
| Number of Scans        | 16      |
| Receiver Gain          | 22      |
| Relaxation Delay       | 10.0000 |
| Pulse Width            | 0.0000  |
| Acquisition Time       | 4.0960  |
| Spectrometer Frequency | 500.07  |
| Spectral Width         | 8000.0  |
| Lowest Frequency       | -1511.1 |
| Nucleus                | 1H      |
| Acquired Size          | 32768   |
| Spectral Size          | 65536   |

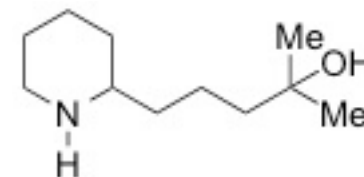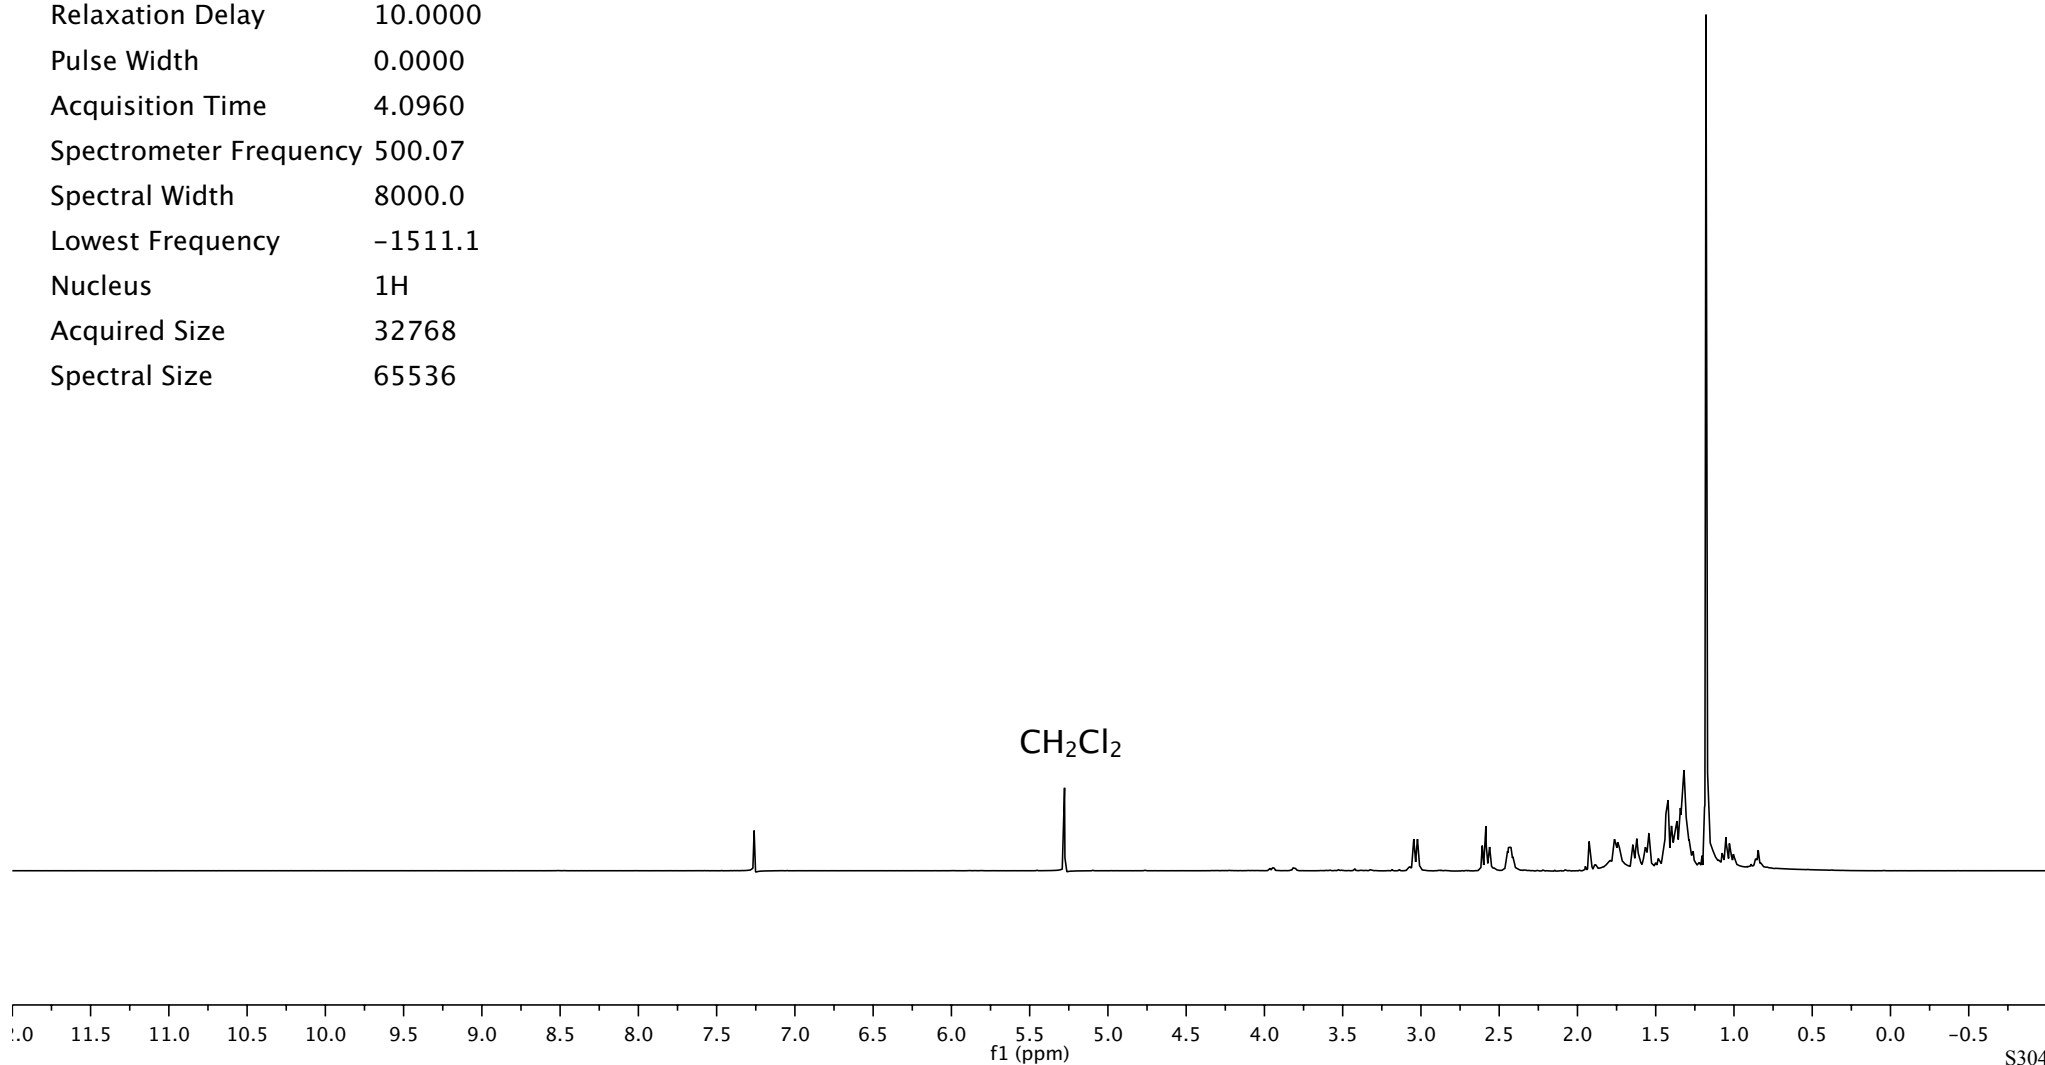

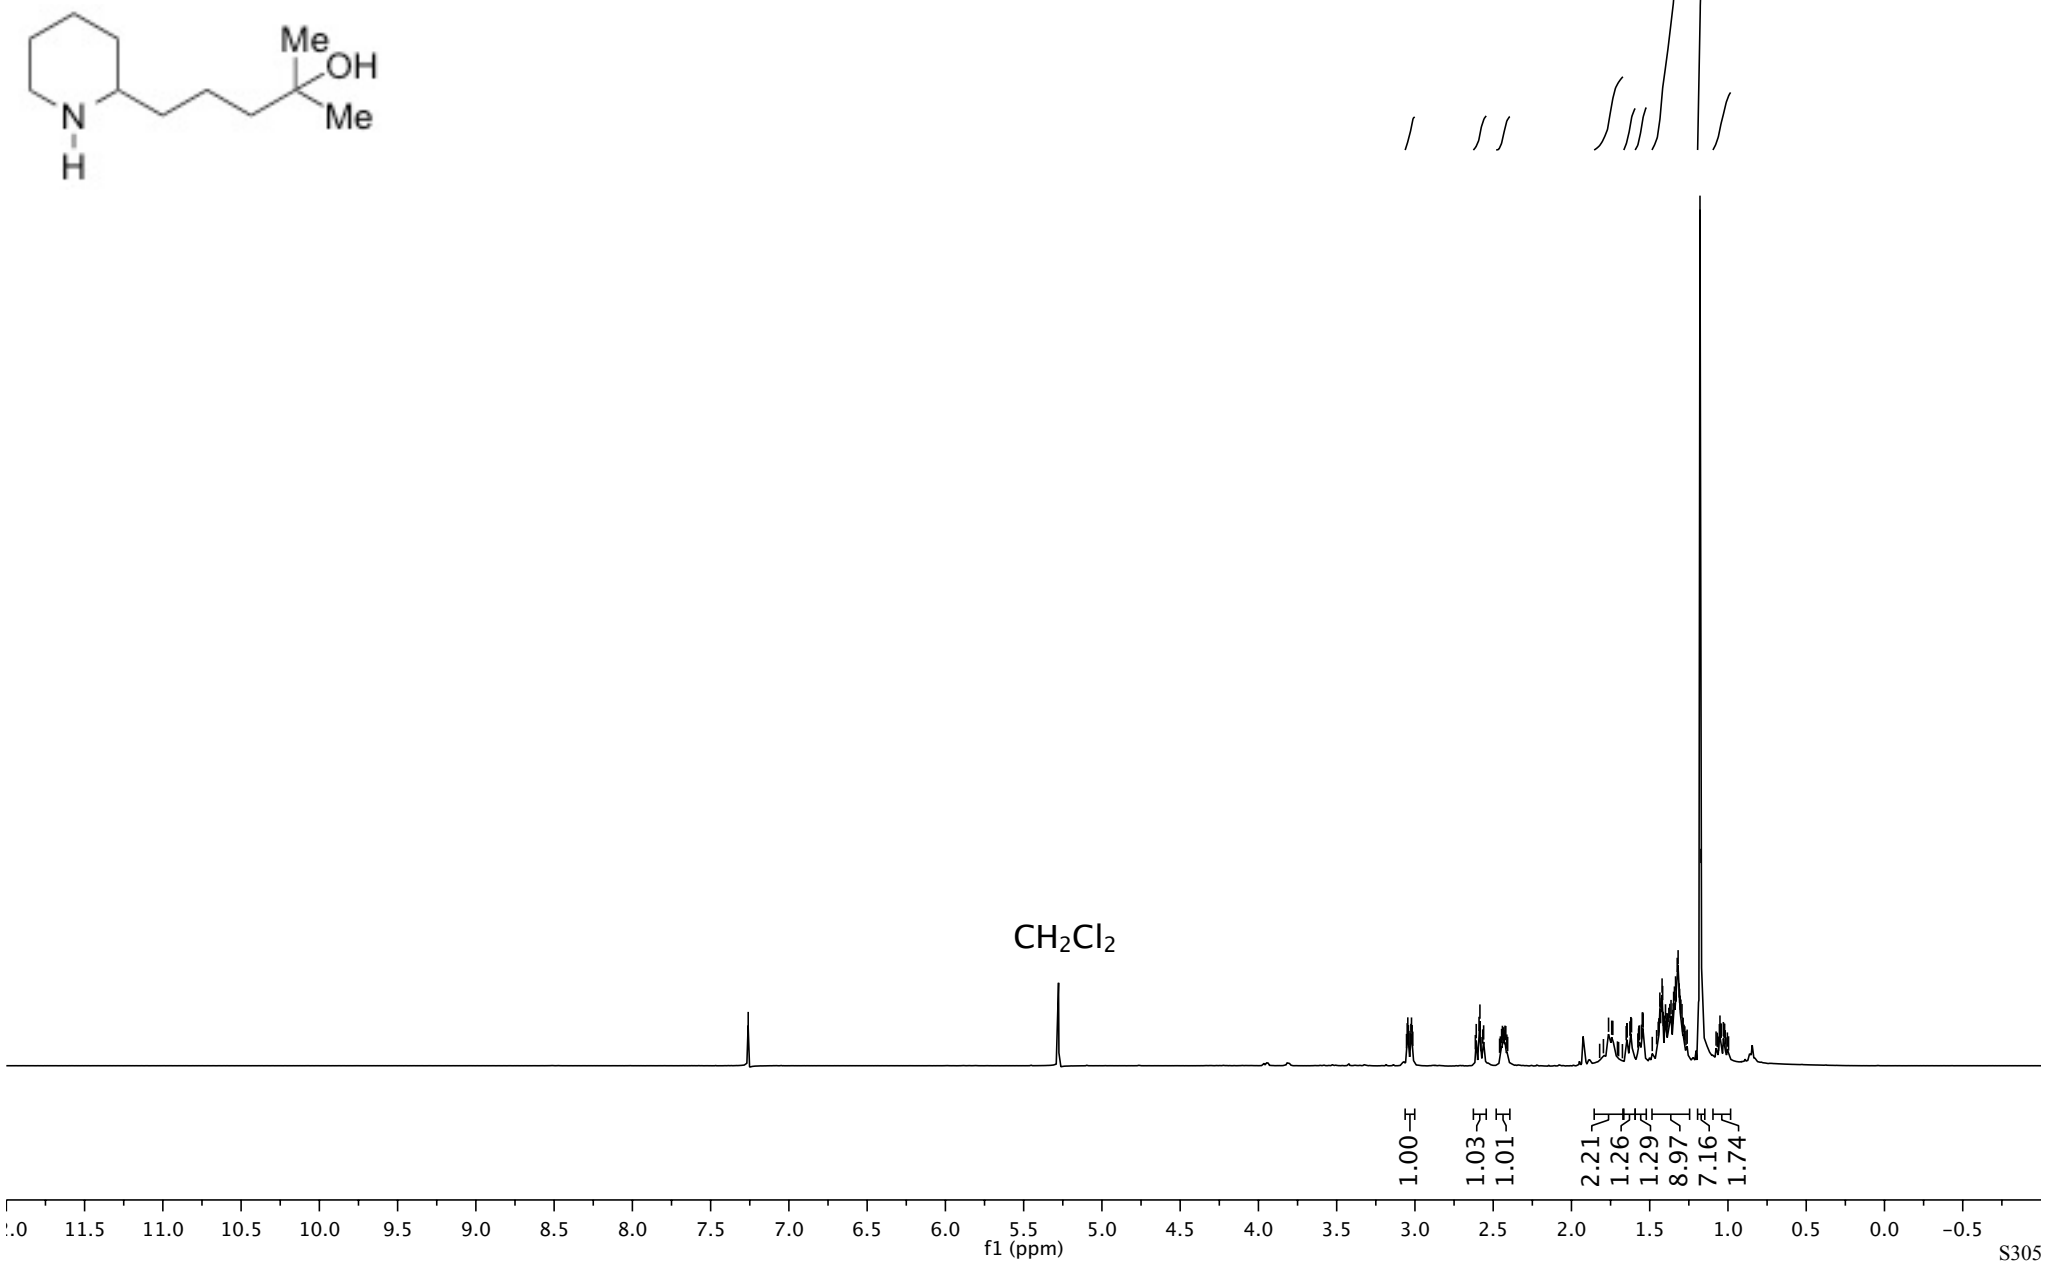

| Parameter              | Value           |
|------------------------|-----------------|
| Origin                 | Varian          |
| Spectrometer           | inova           |
| Solvent                | CDCl3           |
| Temperature            | 20.0            |
| Pulse Sequence         | s2pul           |
| Experiment             | 1D              |
| Probe                  | QUAD            |
| Number of Scans        | 192             |
| Receiver Gain          | 60              |
| Relaxation Delay       | 2.0000          |
| Pulse Width            | 0.0000          |
| Acquisition Time       | 1.0863          |
| Spectrometer Frequency | 125.66          |
| Spectral Width         | 30165.9         |
| Lowest Frequency       | -1273.3         |
| Nucleus                | <sup>13</sup> C |
| Acquired Size          | 32768           |
| Spectral Size          | 65536           |

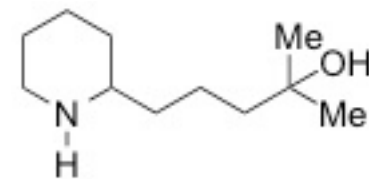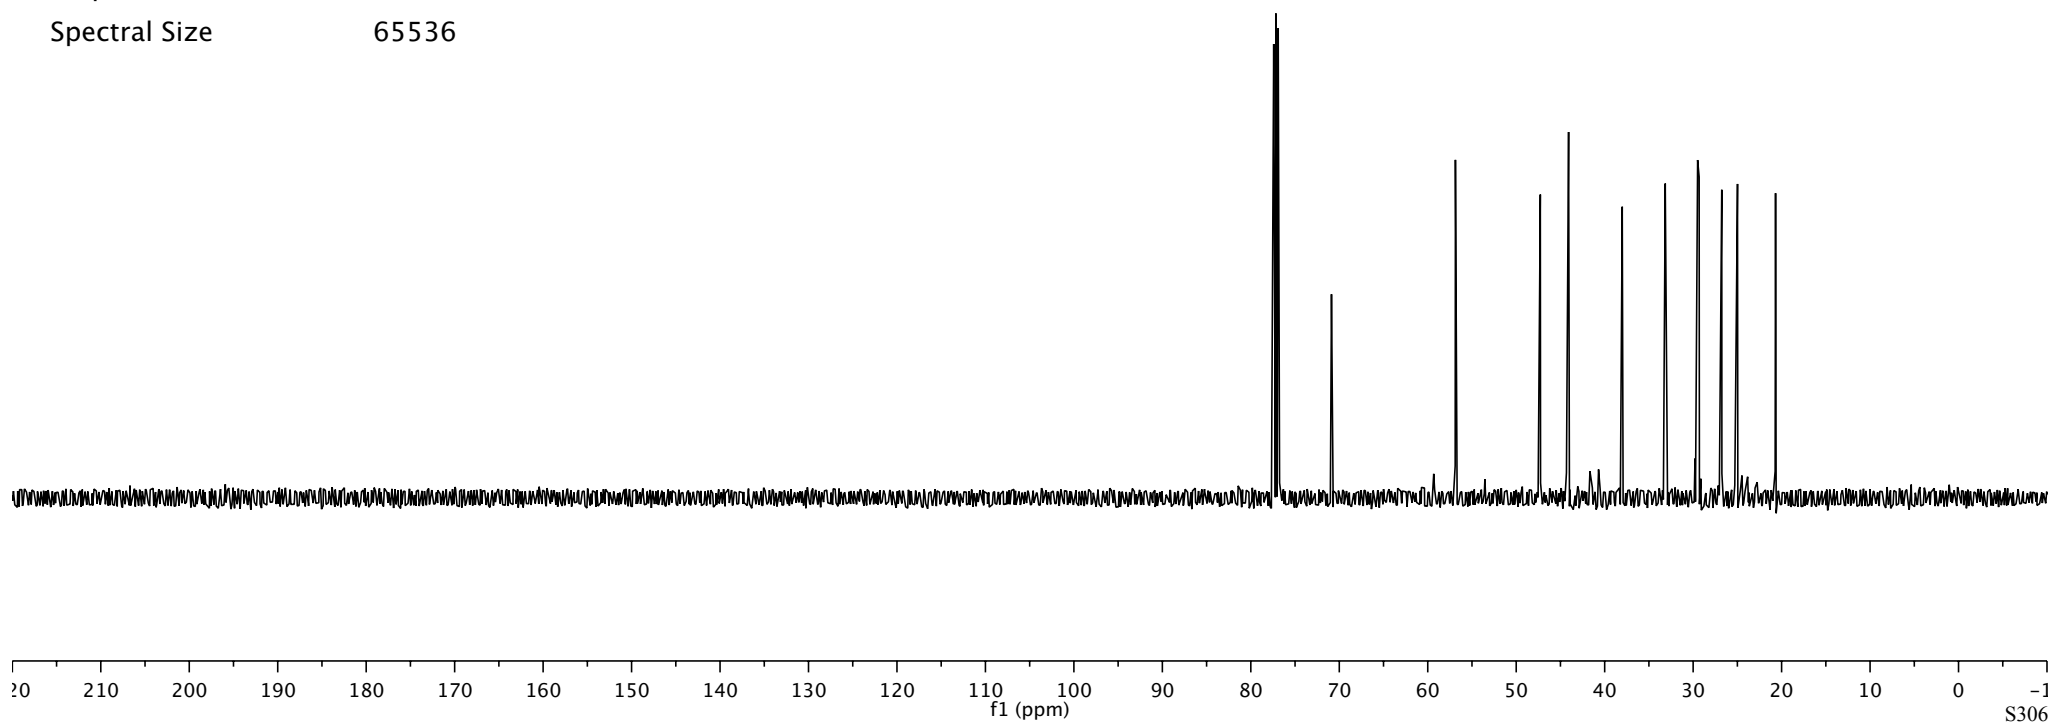

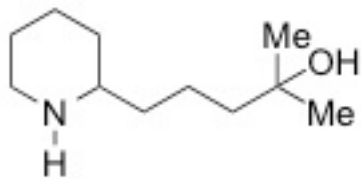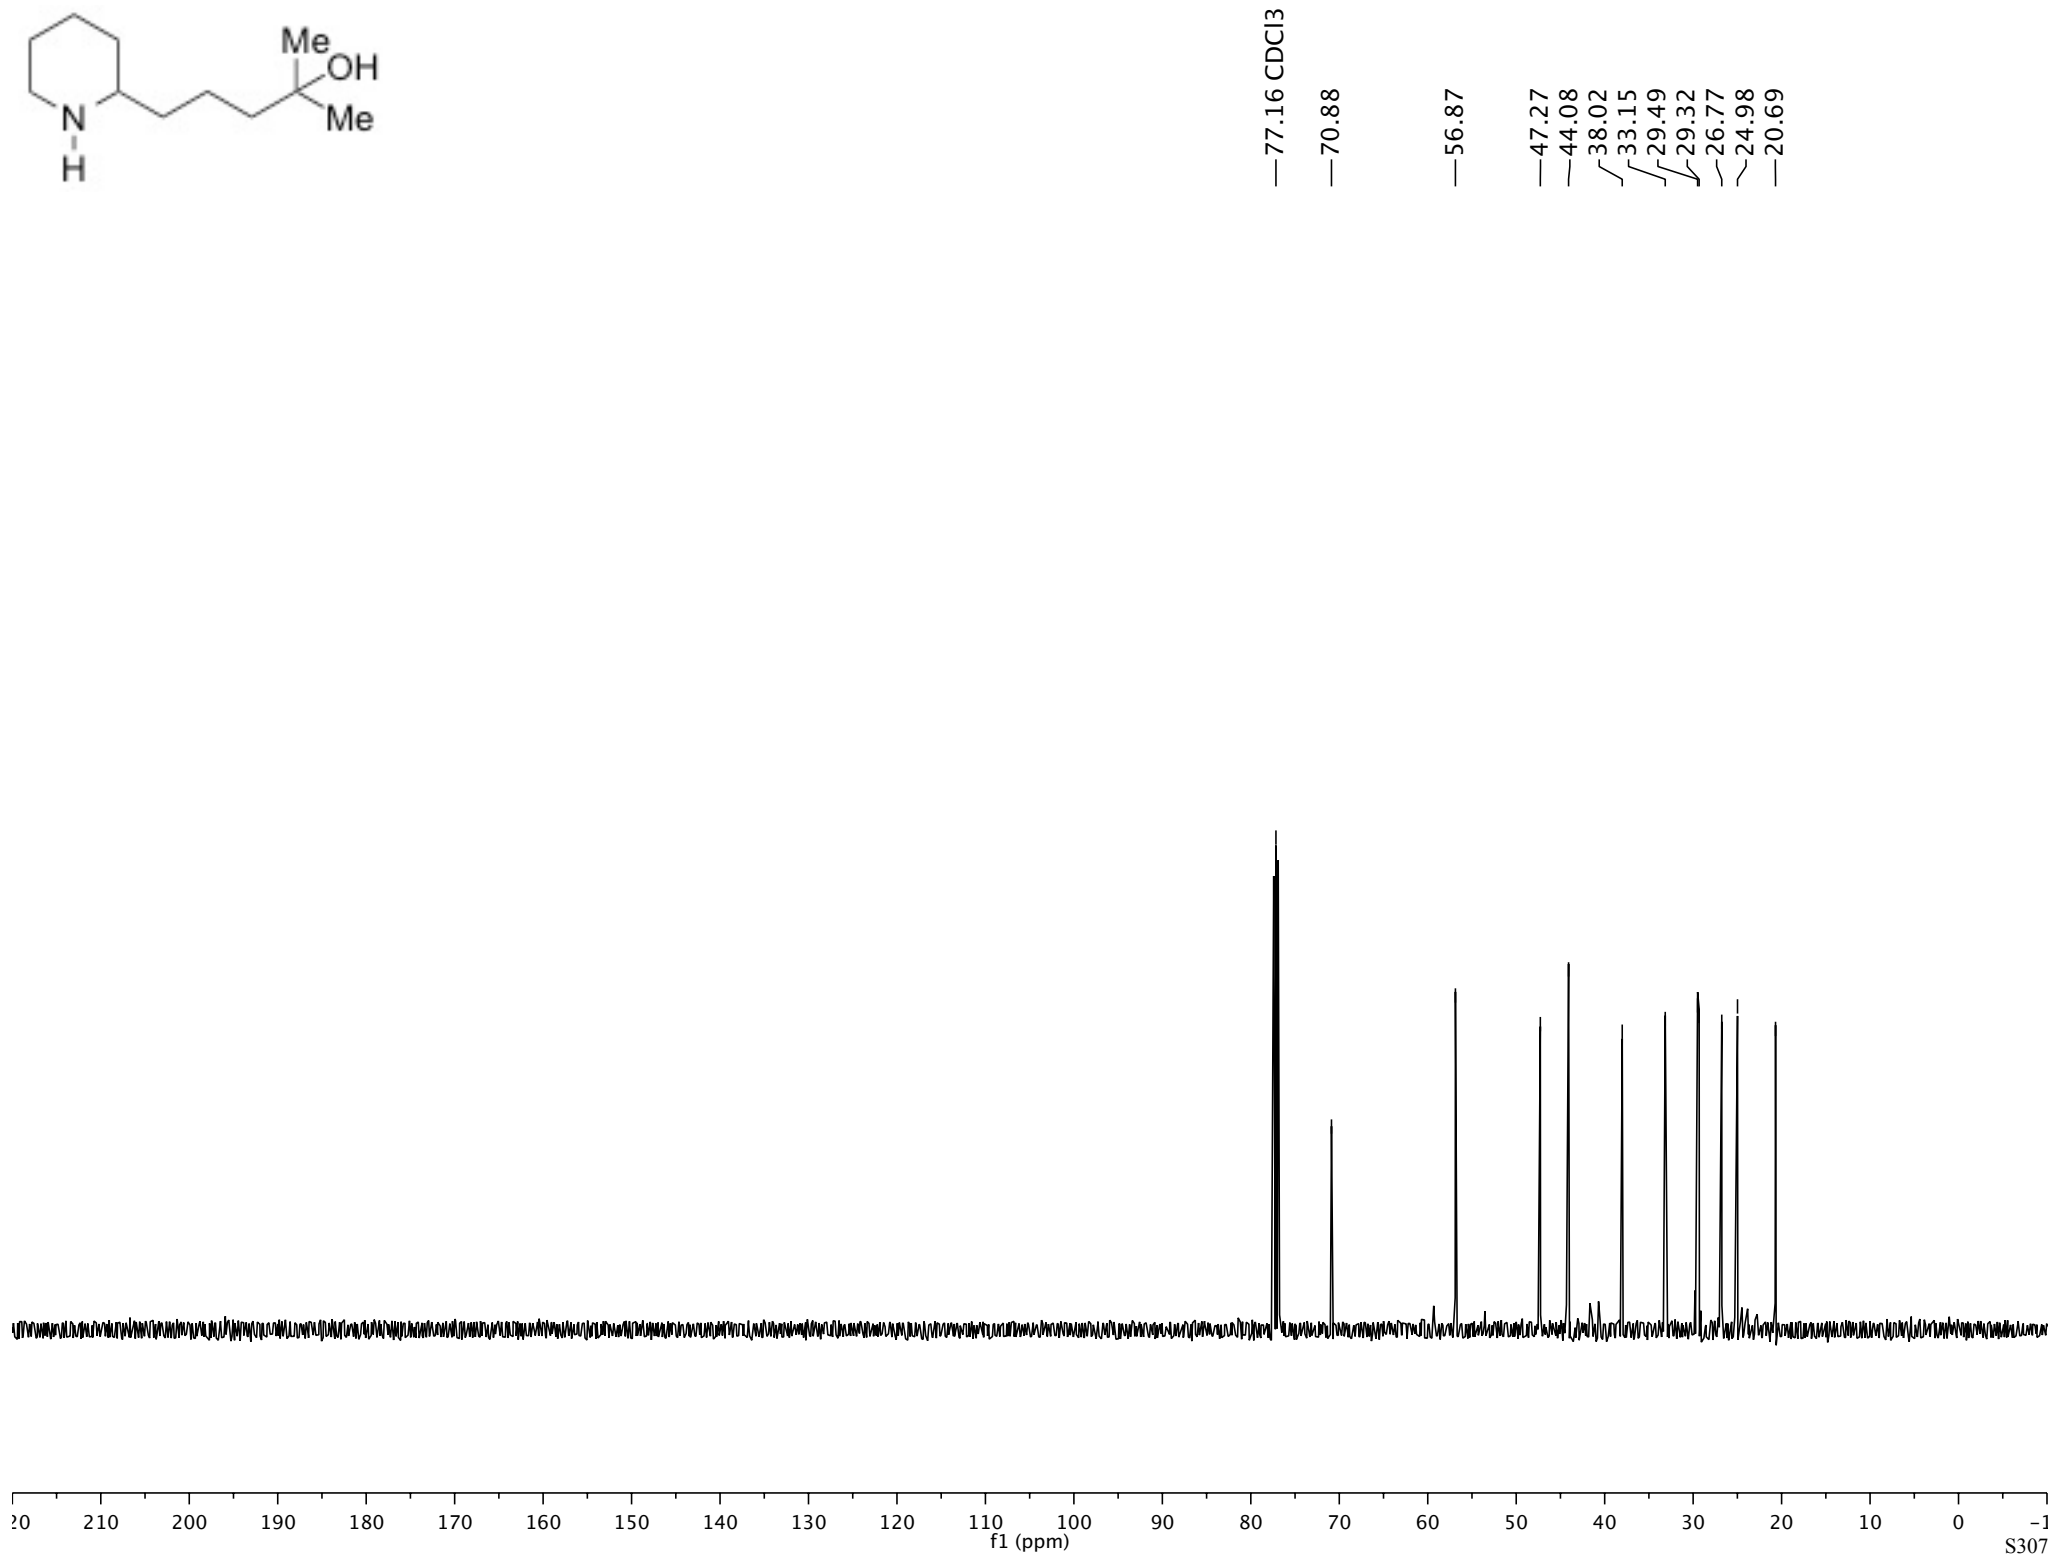

| Parameter              | Value          |
|------------------------|----------------|
| Origin                 | Varian         |
| Spectrometer           | inova          |
| Solvent                | CD3CN          |
| Temperature            | 20.0           |
| Pulse Sequence         | s2pul          |
| Experiment             | 1D             |
| Probe                  | QUAD           |
| Number of Scans        | 8              |
| Receiver Gain          | 41             |
| Relaxation Delay       | 0.0000         |
| Pulse Width            | 0.0000         |
| Acquisition Time       | 4.6645         |
| Spectrometer Frequency | 499.70         |
| Spectral Width         | 7024.9         |
| Lowest Frequency       | -1023.9        |
| Nucleus                | <sup>1</sup> H |
| Acquired Size          | 32768          |
| Spectral Size          | 65536          |

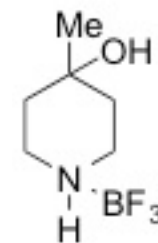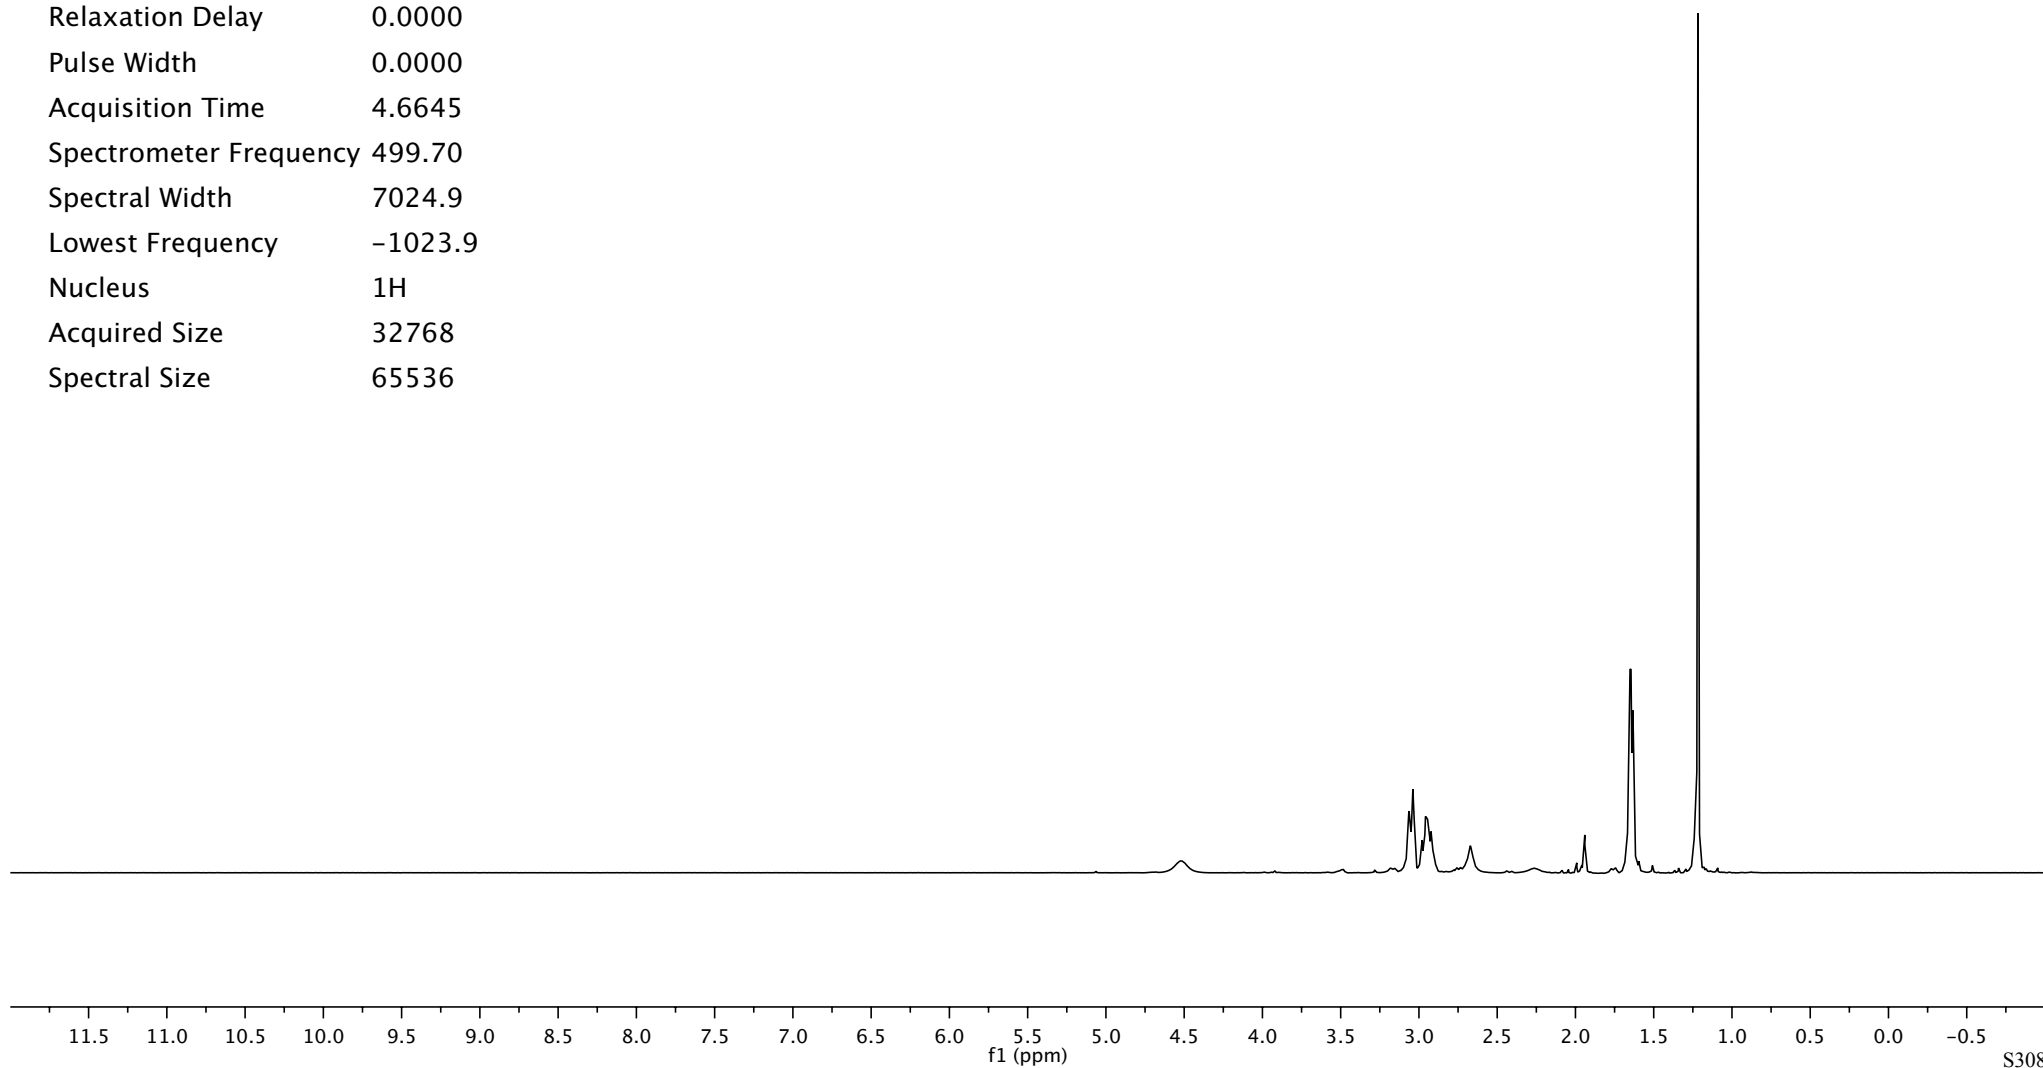

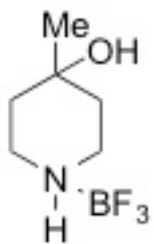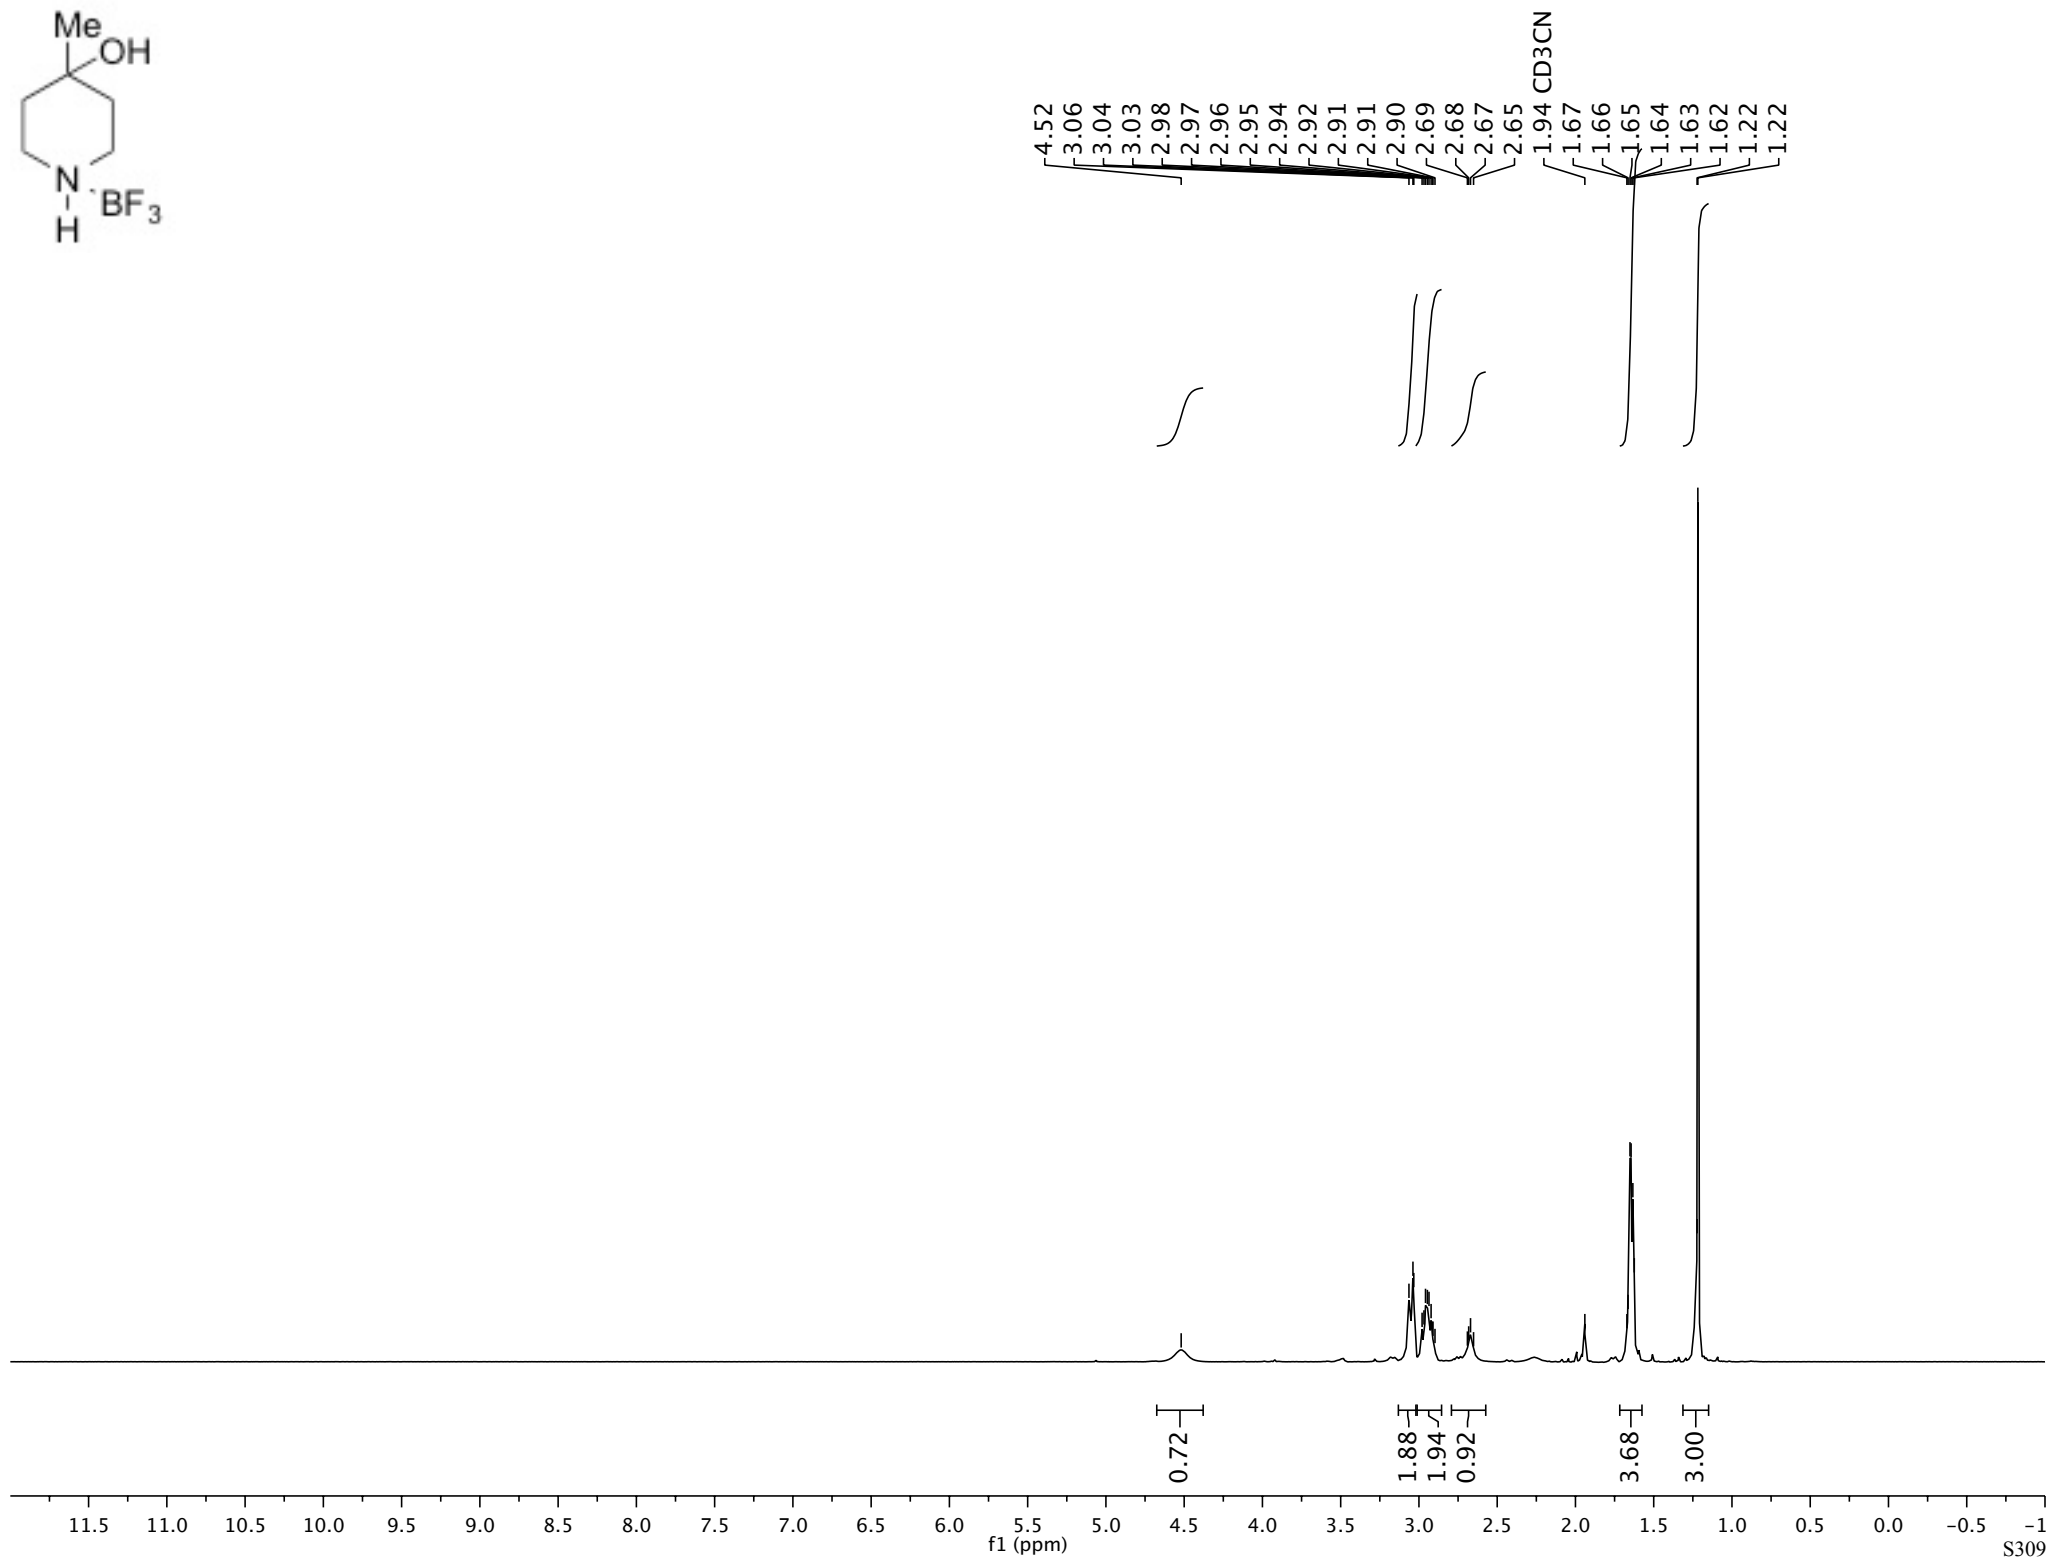

| Parameter              | Value           |
|------------------------|-----------------|
| Origin                 | Varian          |
| Spectrometer           | inova           |
| Solvent                | CD3CN           |
| Temperature            | 20.0            |
| Pulse Sequence         | s2pul           |
| Experiment             | 1D              |
| Probe                  | QUAD            |
| Number of Scans        | 112             |
| Receiver Gain          | 60              |
| Relaxation Delay       | 1.0000          |
| Pulse Width            | 0.0000          |
| Acquisition Time       | 1.0863          |
| Spectrometer Frequency | 125.66          |
| Spectral Width         | 30165.9         |
| Lowest Frequency       | -1178.5         |
| Nucleus                | <sup>13</sup> C |
| Acquired Size          | 32768           |
| Spectral Size          | 65536           |

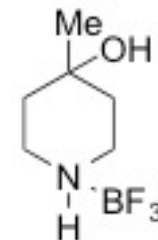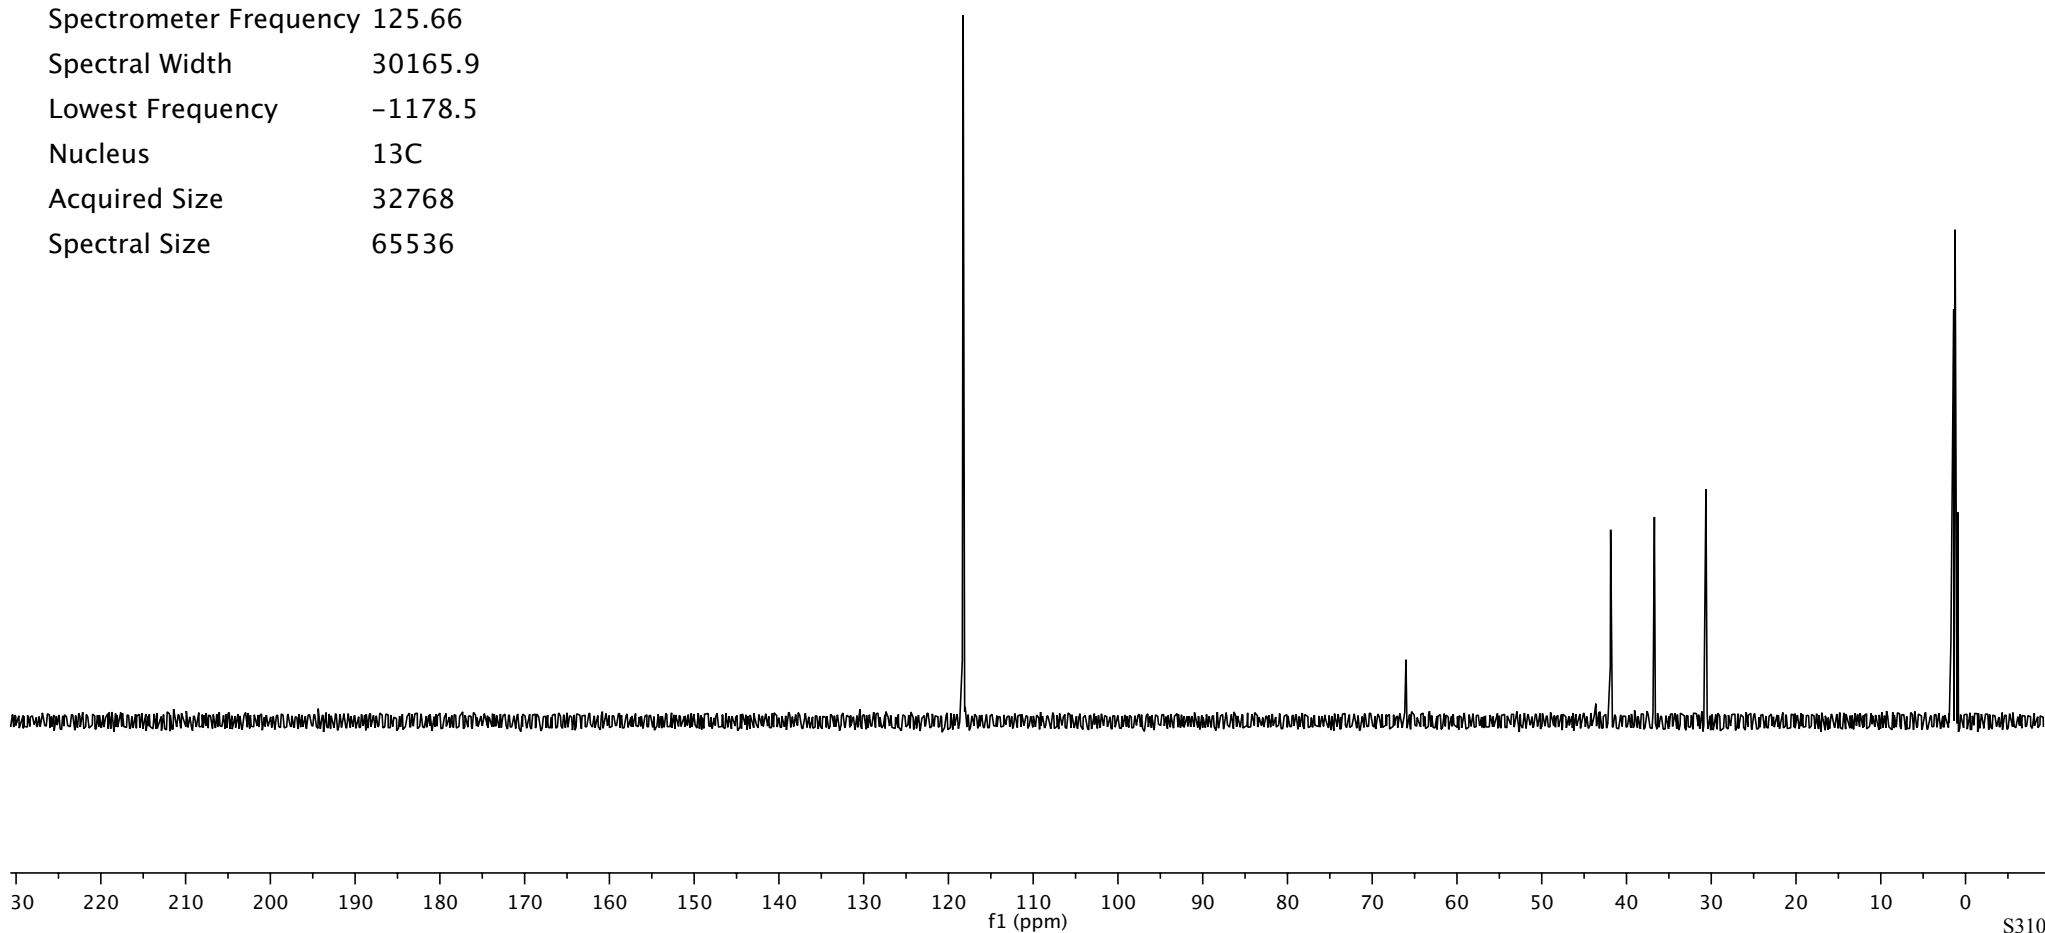

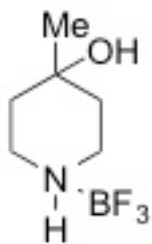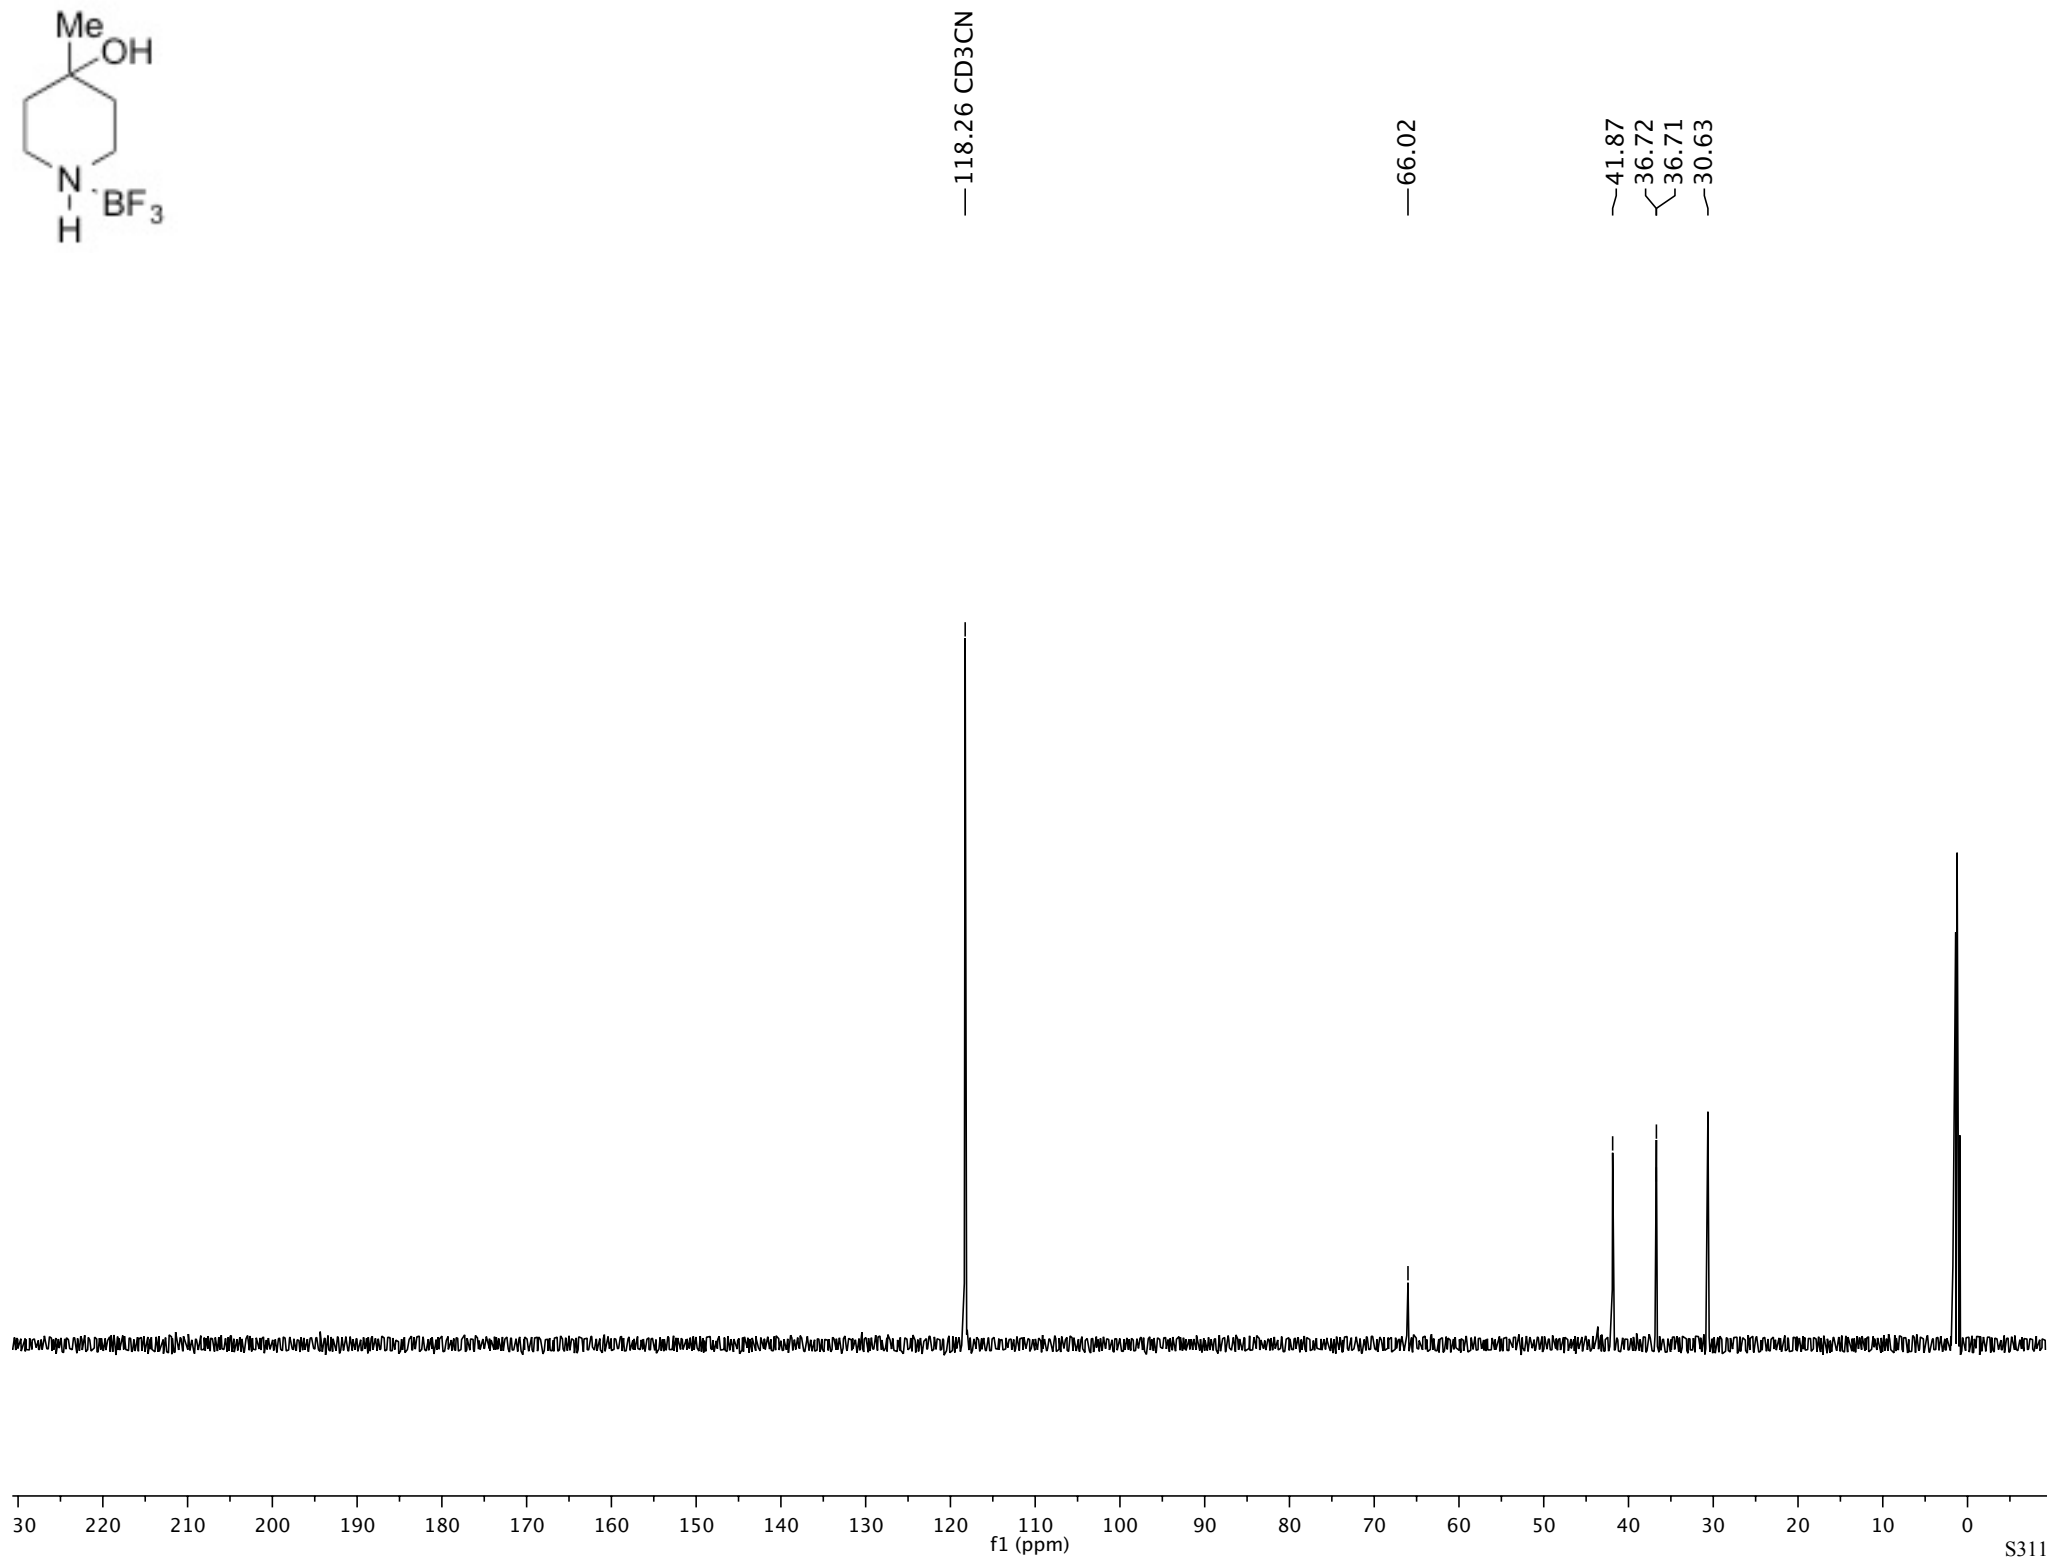



| Parameter              | Value           |
|------------------------|-----------------|
| Origin                 | Varian          |
| Spectrometer           | inova           |
| Solvent                | CD3CN           |
| Temperature            | 20.0            |
| Pulse Sequence         | s2pul           |
| Experiment             | 1D              |
| Probe                  | QUAD            |
| Number of Scans        | 128             |
| Receiver Gain          | 60              |
| Relaxation Delay       | 0.0000          |
| Pulse Width            | 0.0000          |
| Acquisition Time       | 0.3277          |
| Spectrometer Frequency | 470.15          |
| Spectral Width         | 100000.0        |
| Lowest Frequency       | -79501.7        |
| Nucleus                | <sup>19</sup> F |
| Acquired Size          | 32768           |
| Spectral Size          | 65536           |

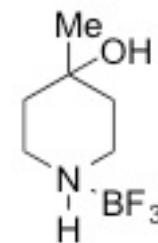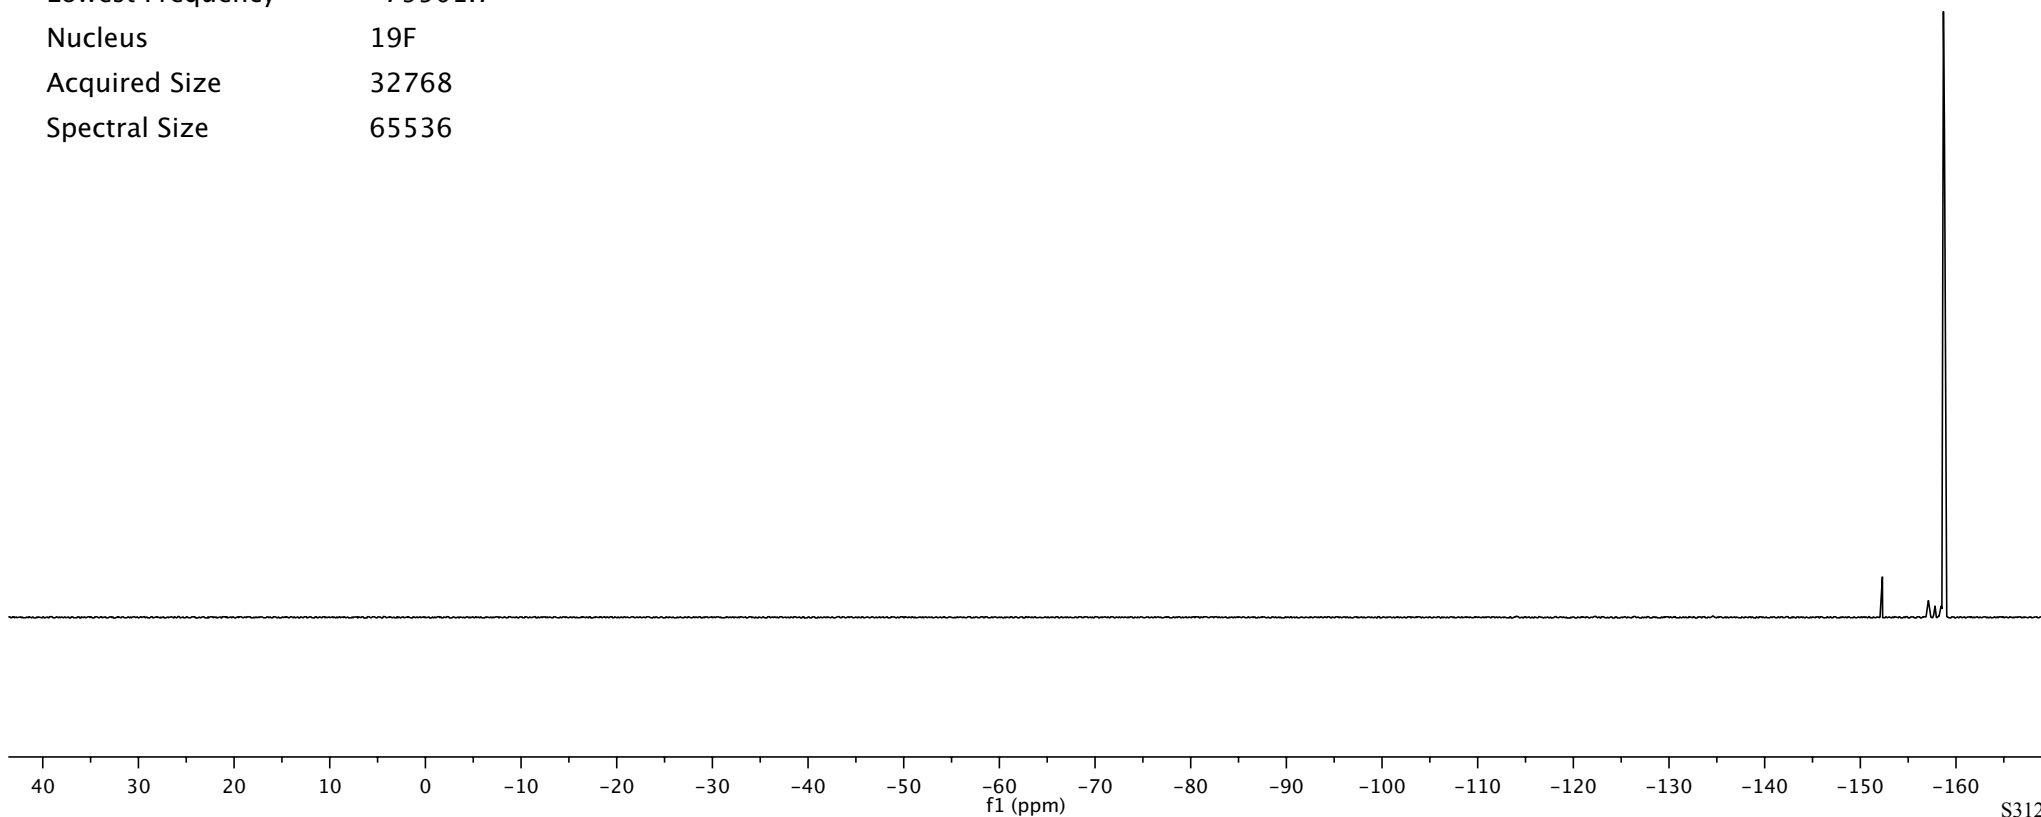

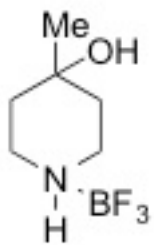

158.68  
158.72  
158.75  
158.79

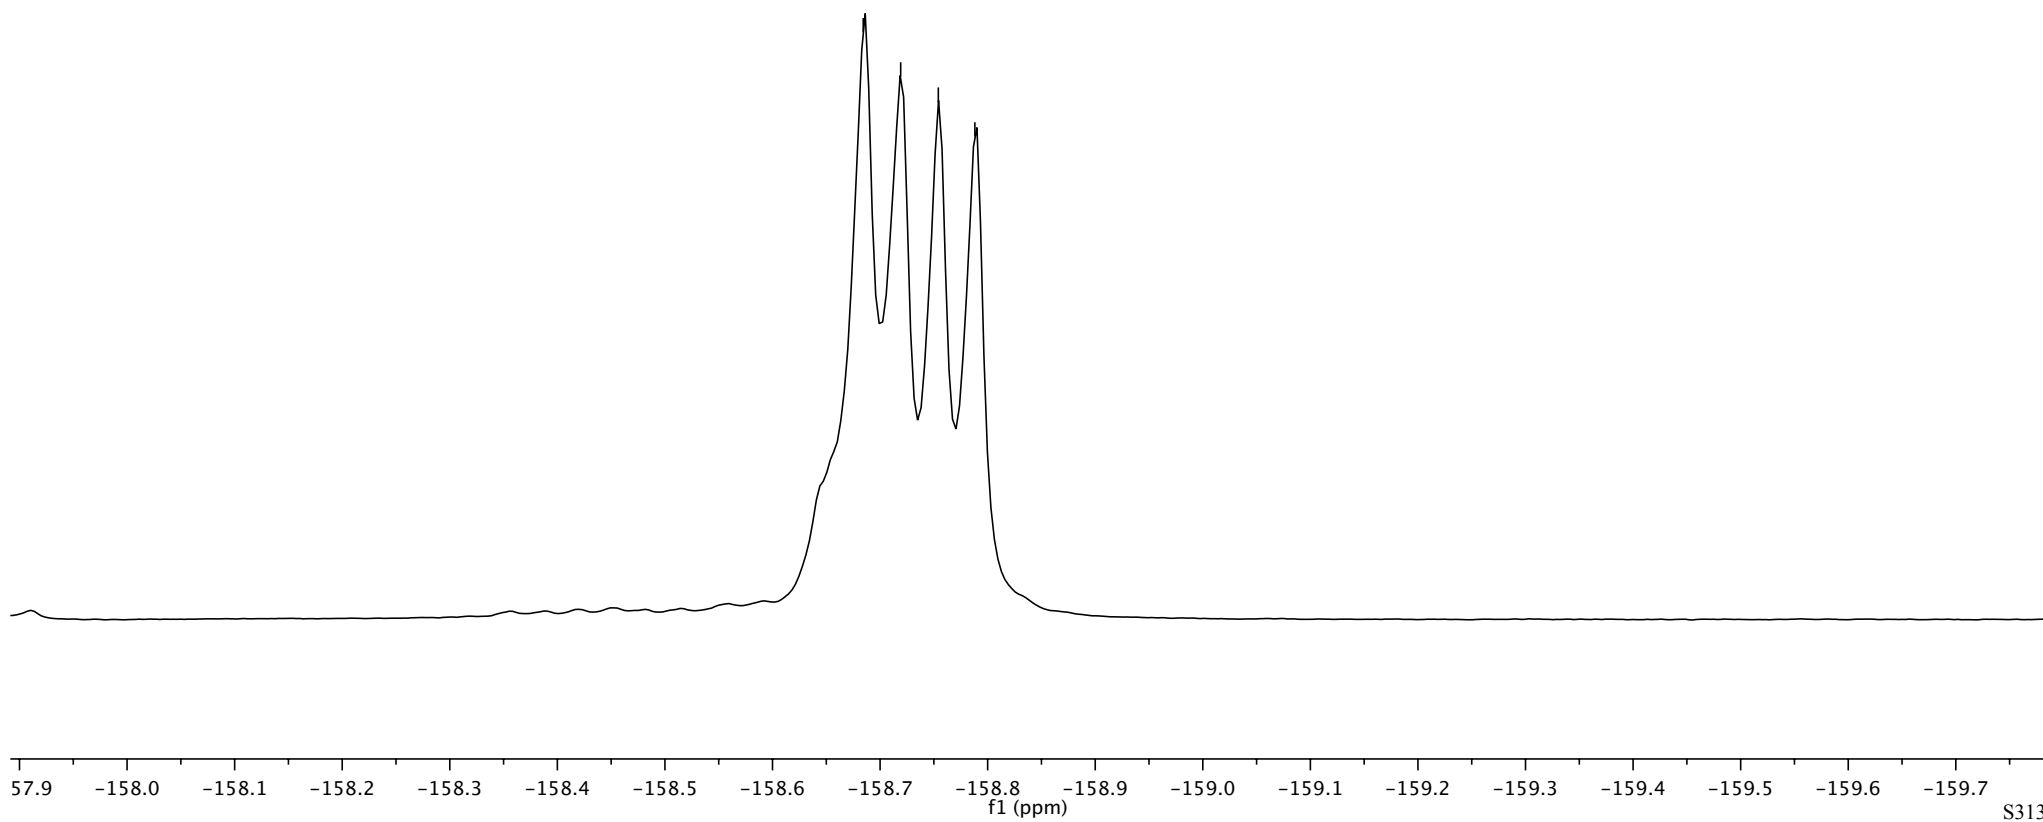

| Parameter              | Value        |
|------------------------|--------------|
| Origin                 | Varian       |
| Spectrometer           | inova        |
| Solvent                | CDCl3        |
| Temperature            | 20.0         |
| Pulse Sequence         | s2pul        |
| Experiment             | 1D           |
| Probe                  | hcn          |
| Number of Scans        | 16           |
| Receiver Gain          | 26           |
| Relaxation Delay       | 2.0000       |
| Pulse Width            | 0.0000       |
| Acquisition Time       | 4.0960       |
| Spectrometer Frequency | 500.07       |
| Spectral Width         | 8000.0       |
| Lowest Frequency       | -1521.1      |
| Nucleus                | $^1\text{H}$ |
| Acquired Size          | 32768        |
| Spectral Size          | 65536        |

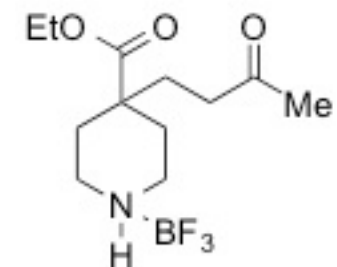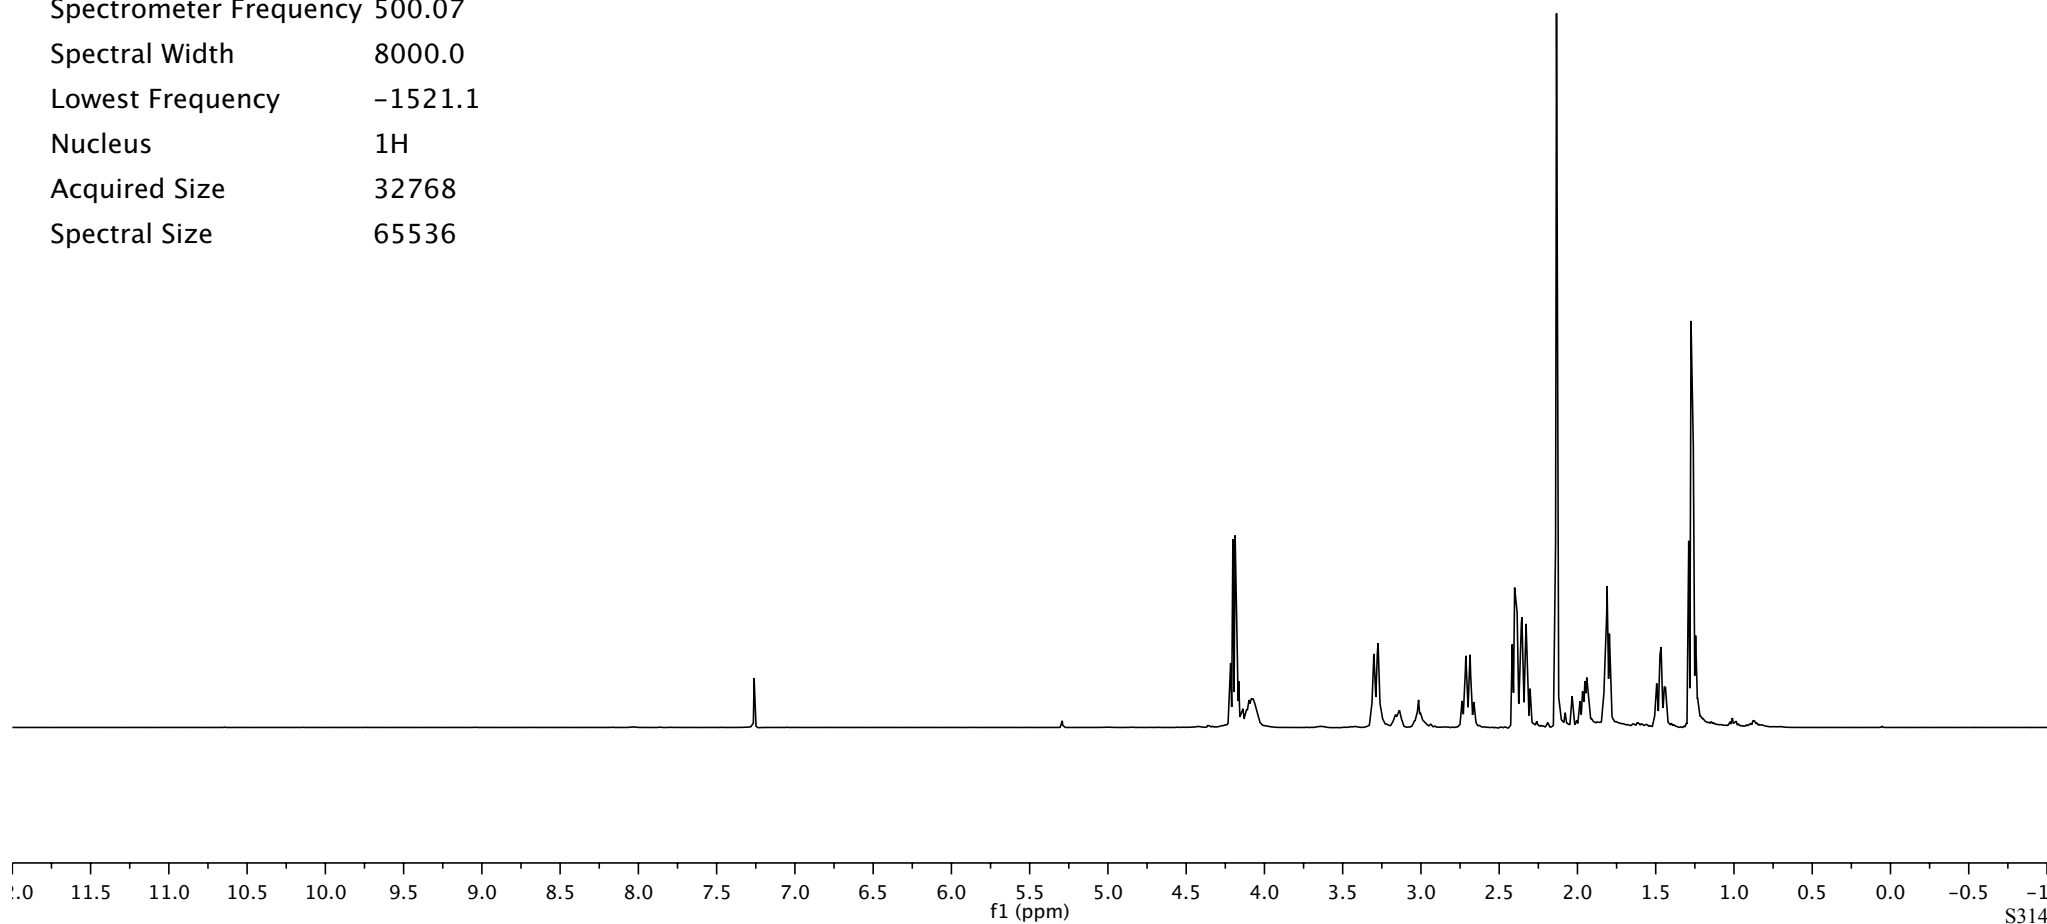

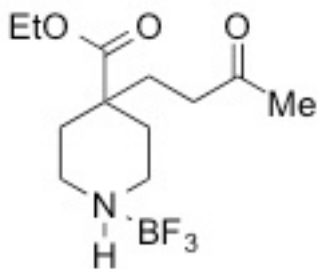

— 7.26 CDCl<sub>3</sub>

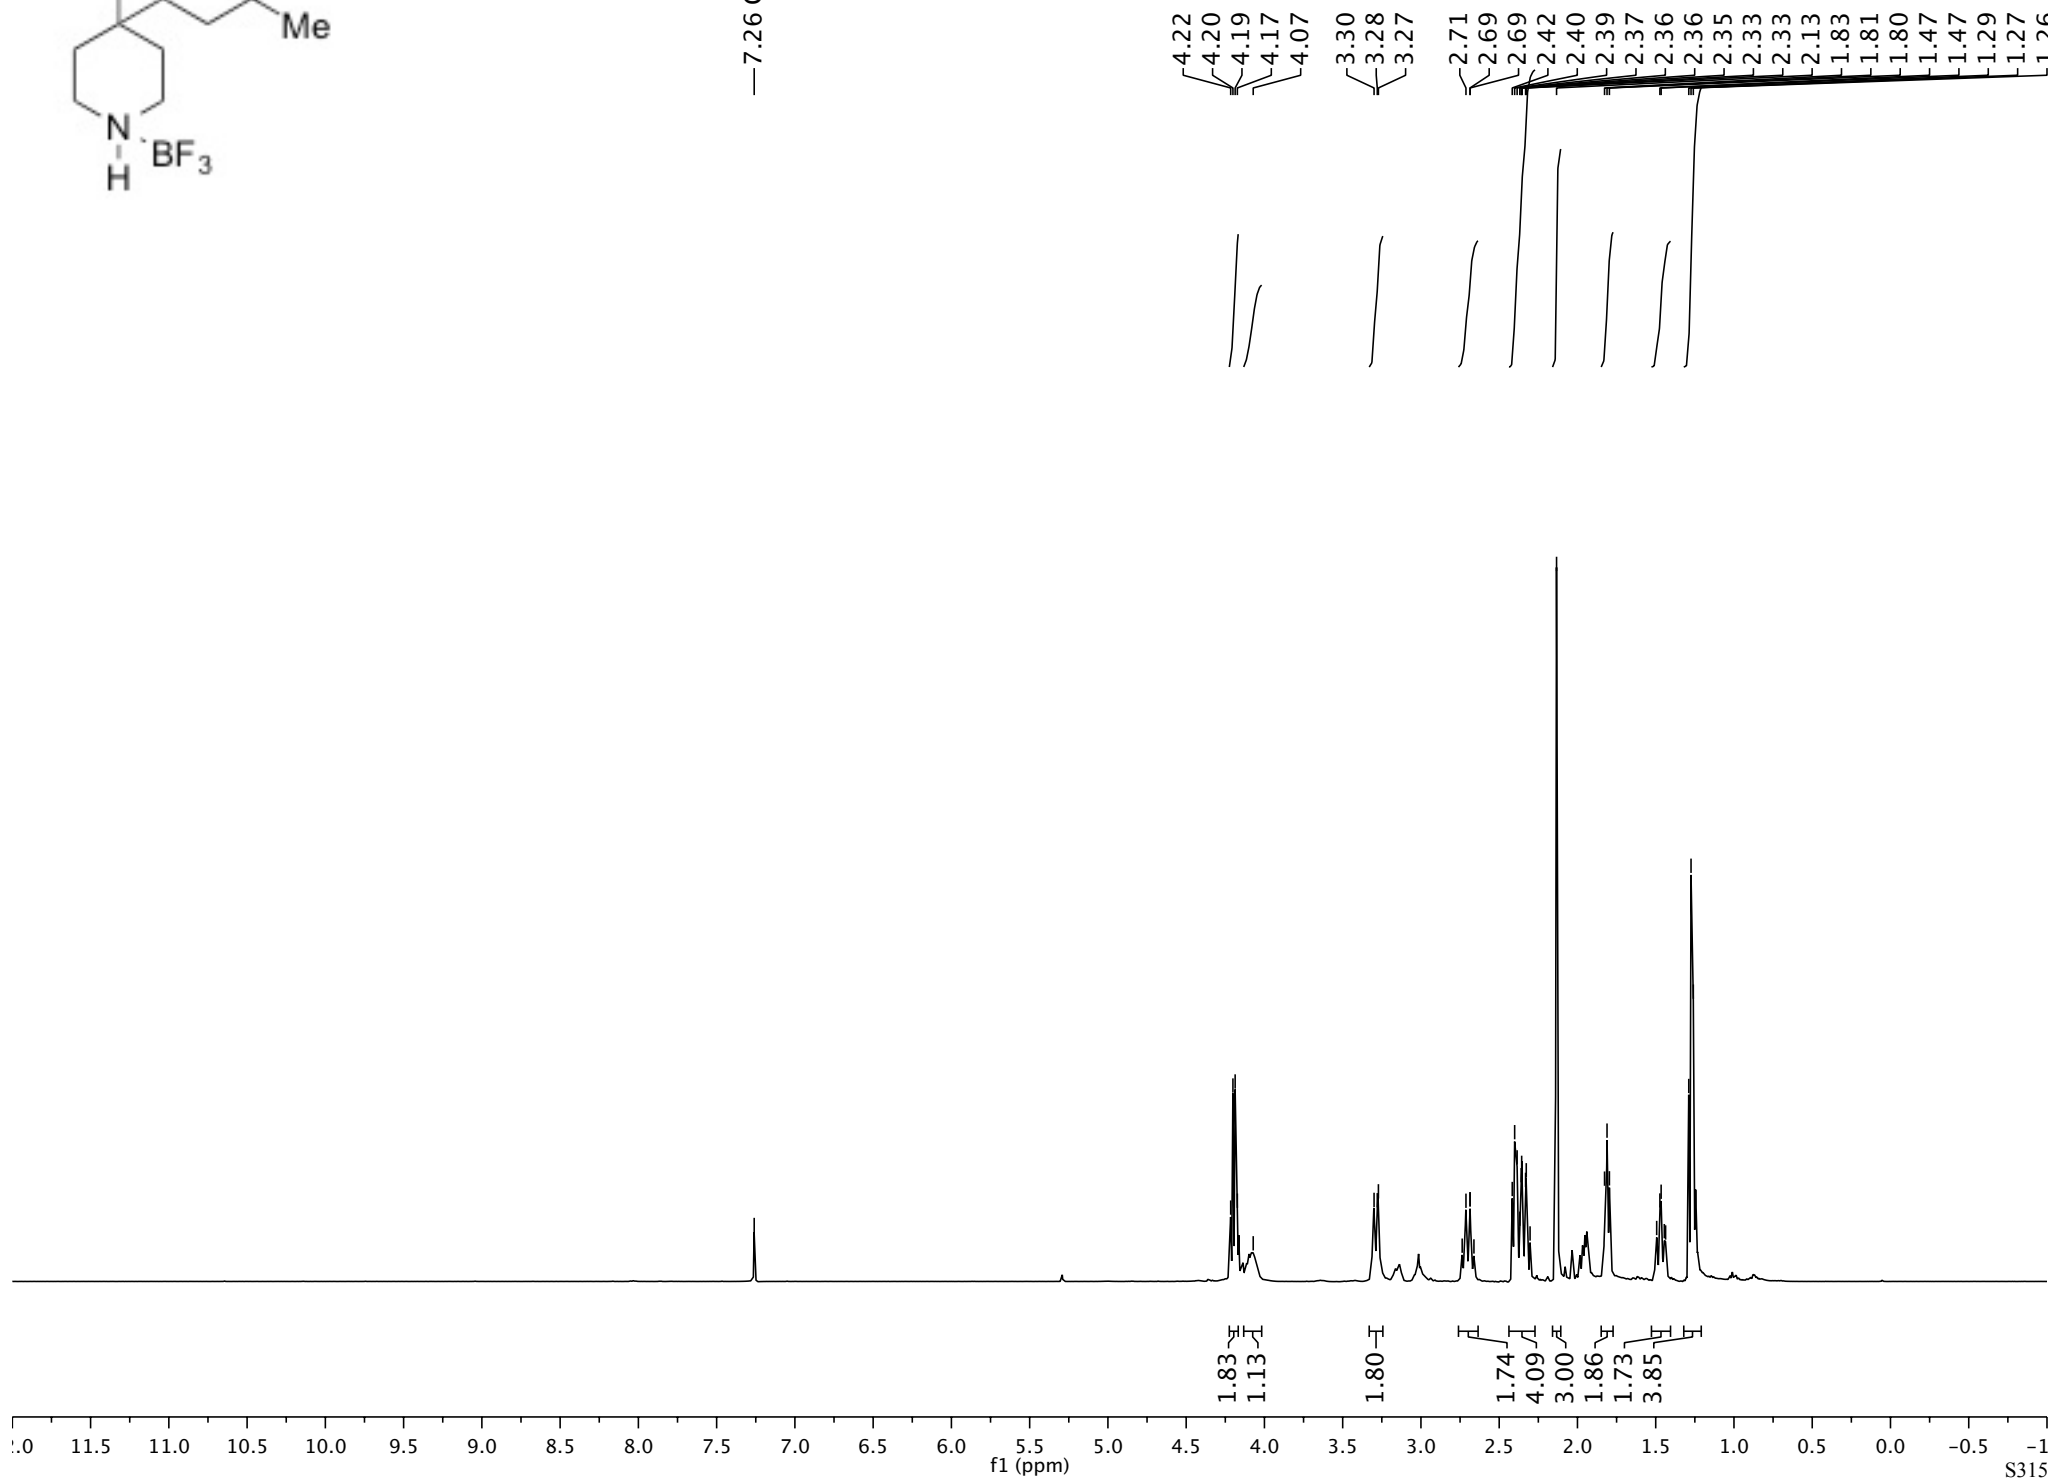

| Parameter              | Value           |
|------------------------|-----------------|
| Origin                 | Varian          |
| Spectrometer           | inova           |
| Solvent                | CDCl3           |
| Temperature            | 20.0            |
| Pulse Sequence         | s2pul           |
| Experiment             | 1D              |
| Probe                  | QUAD            |
| Number of Scans        | 520             |
| Receiver Gain          | 60              |
| Relaxation Delay       | 2.0000          |
| Pulse Width            | 0.0000          |
| Acquisition Time       | 1.0863          |
| Spectrometer Frequency | 125.66          |
| Spectral Width         | 30165.9         |
| Lowest Frequency       | -1275.1         |
| Nucleus                | <sup>13</sup> C |
| Acquired Size          | 32768           |
| Spectral Size          | 65536           |

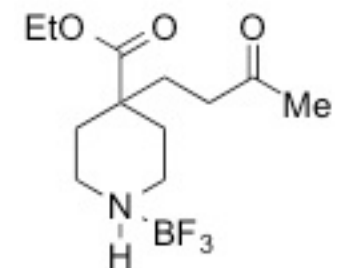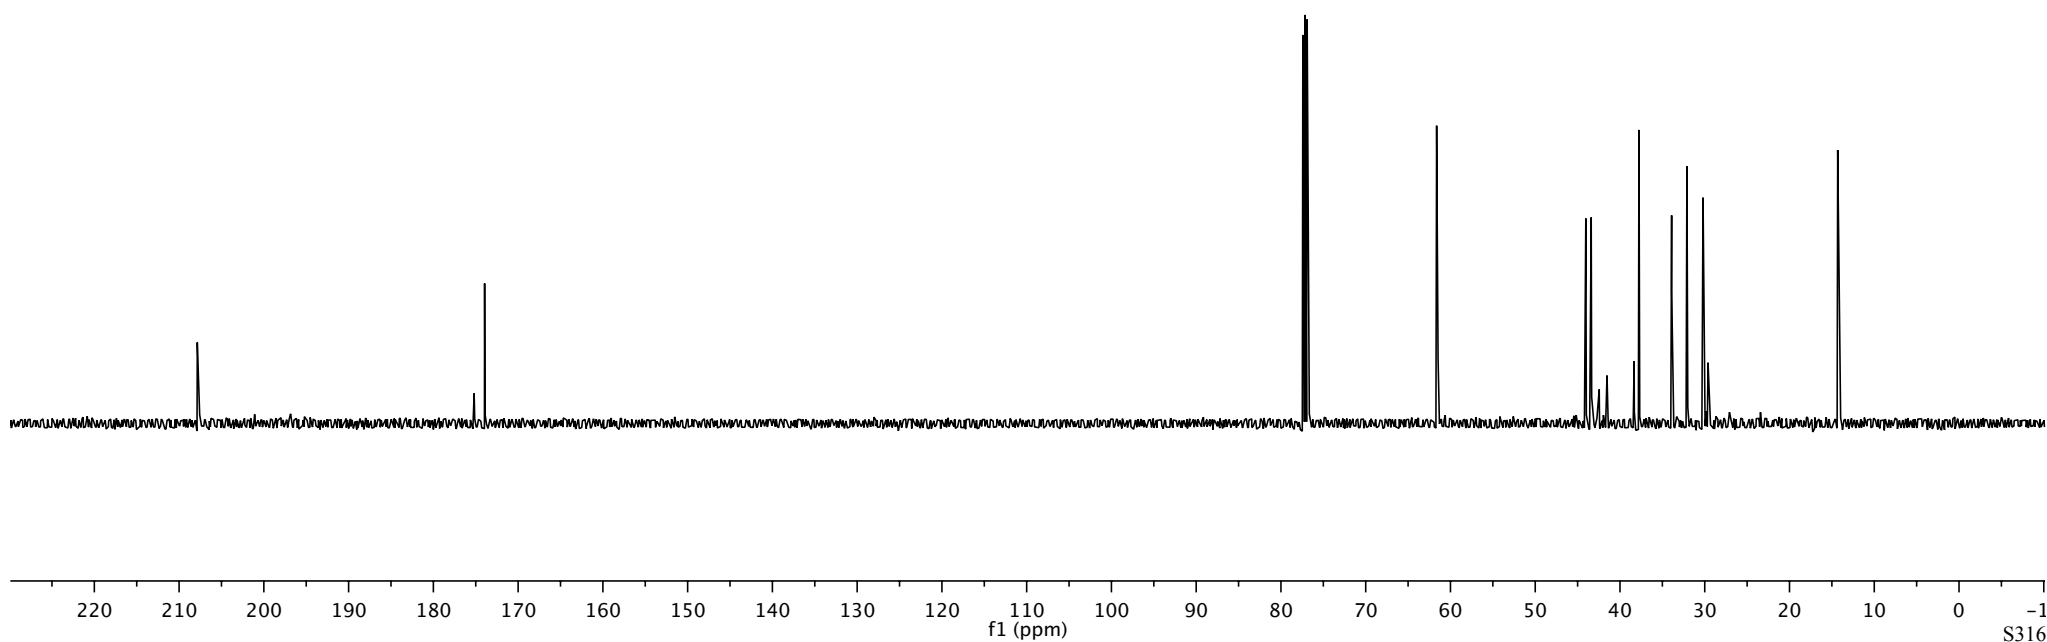

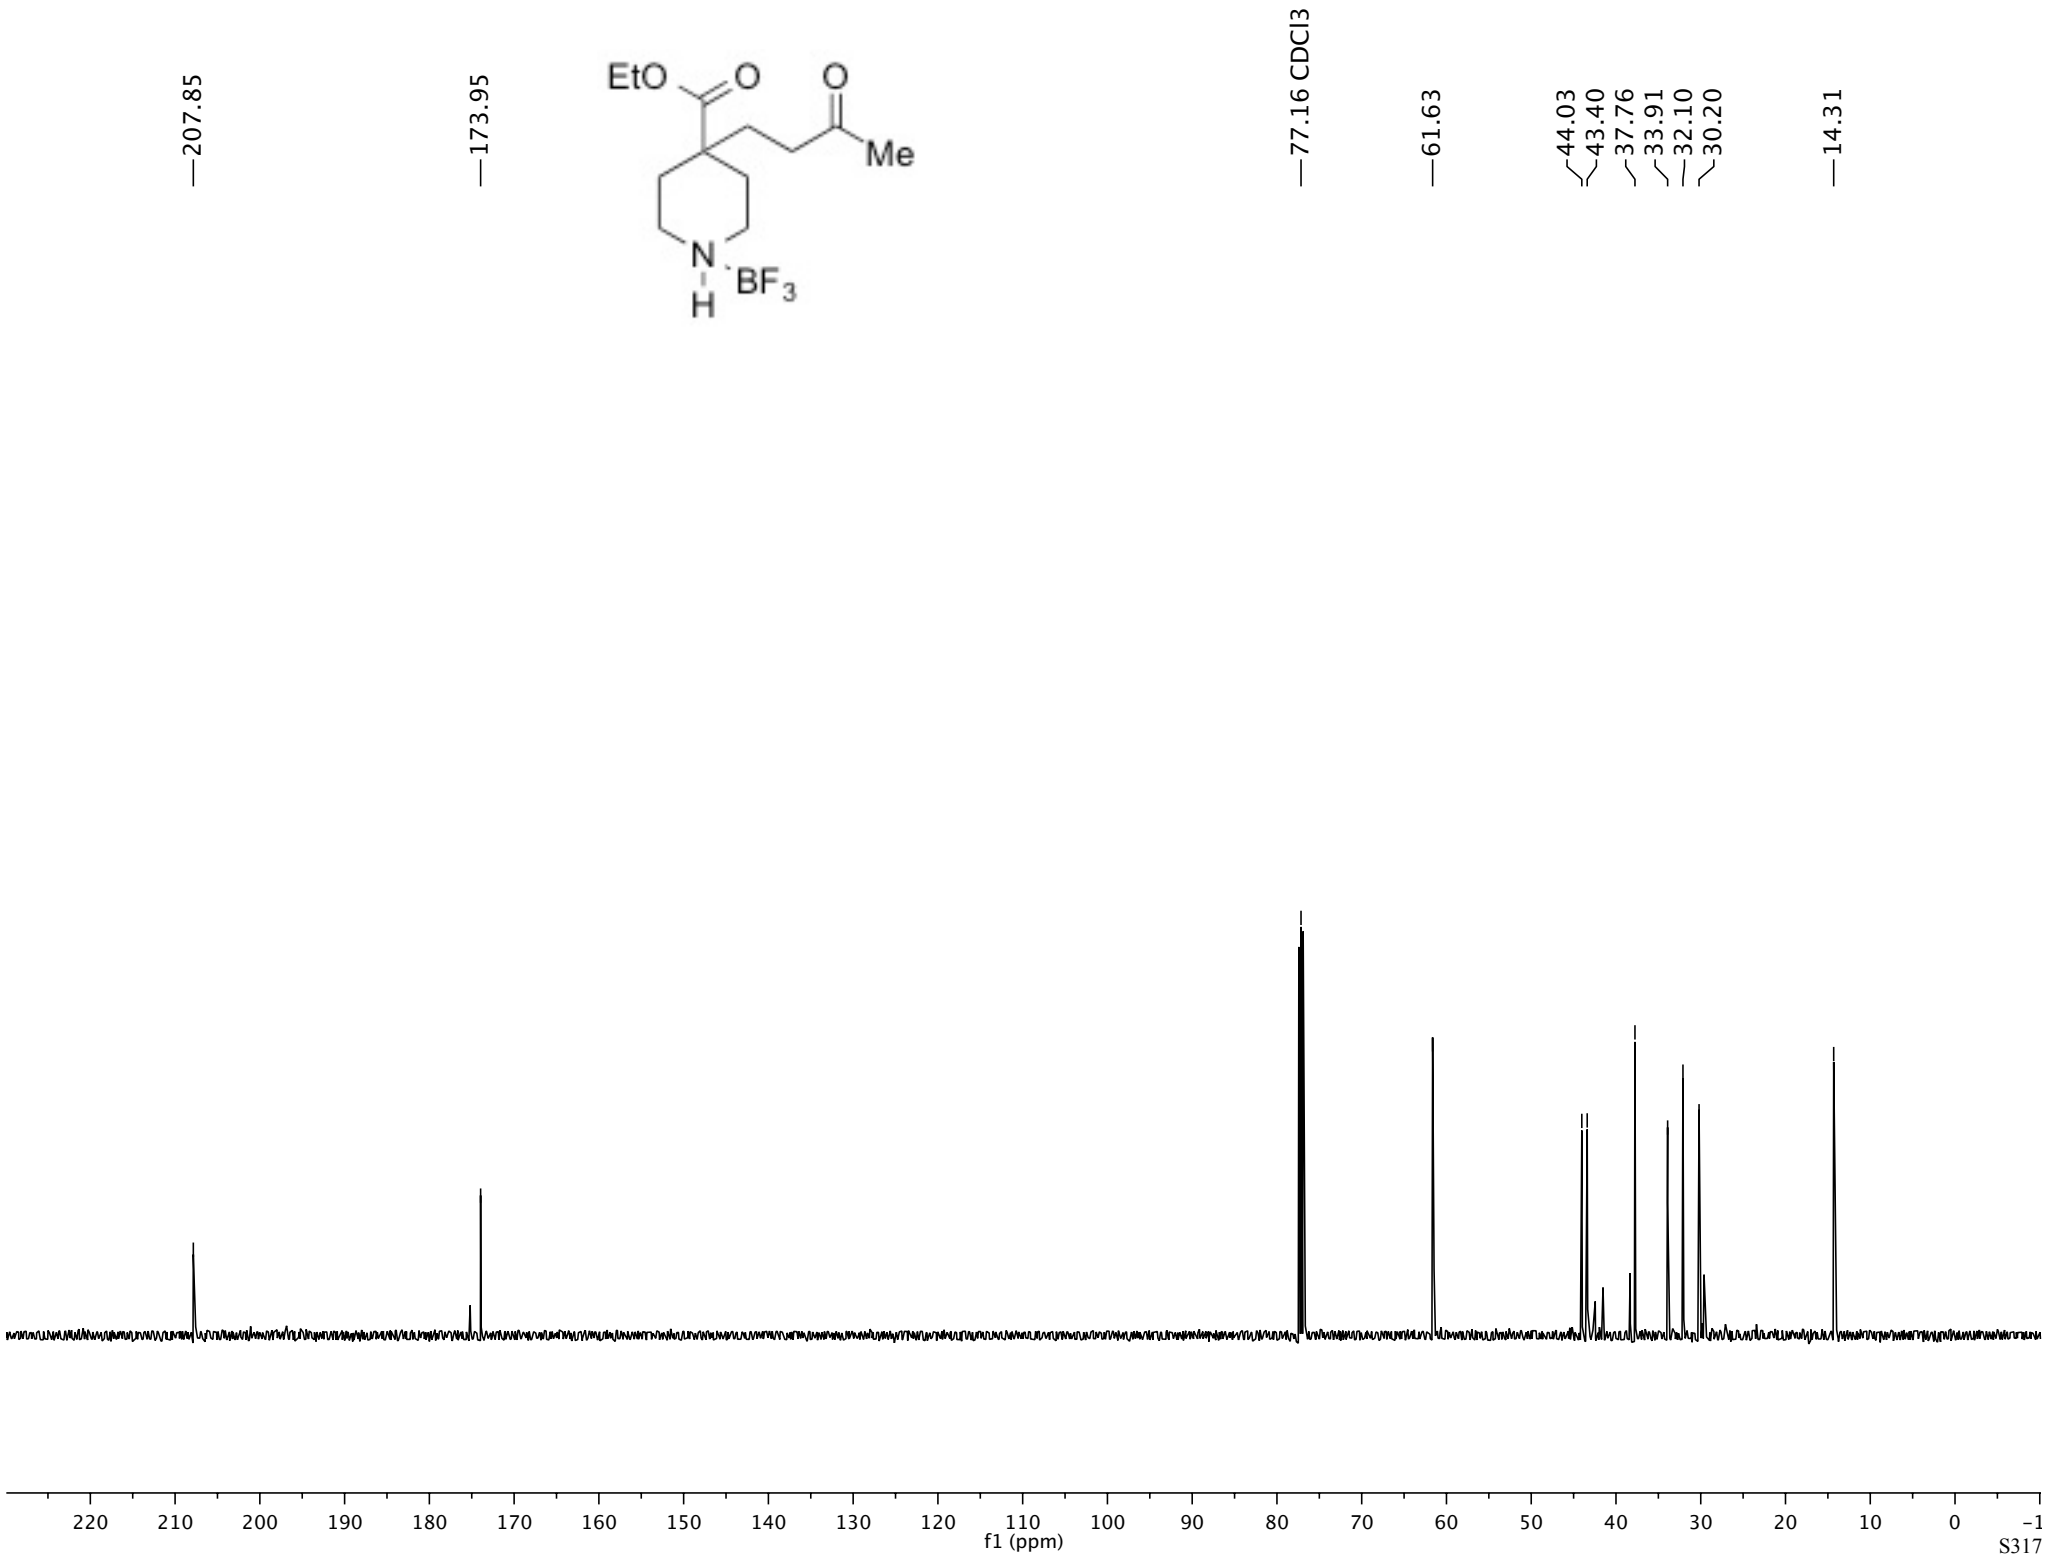

| Parameter              | Value           |
|------------------------|-----------------|
| Origin                 | Varian          |
| Spectrometer           | inova           |
| Solvent                | CDCl3           |
| Temperature            | 20.0            |
| Pulse Sequence         | s2pul           |
| Experiment             | 1D              |
| Probe                  | QUAD            |
| Number of Scans        | 132             |
| Receiver Gain          | 60              |
| Relaxation Delay       | 0.0000          |
| Pulse Width            | 0.0000          |
| Acquisition Time       | 0.3277          |
| Spectrometer Frequency | 470.15          |
| Spectral Width         | 100000.0        |
| Lowest Frequency       | -79501.3        |
| Nucleus                | <sup>19</sup> F |
| Acquired Size          | 32768           |
| Spectral Size          | 65536           |

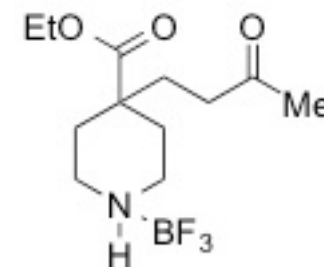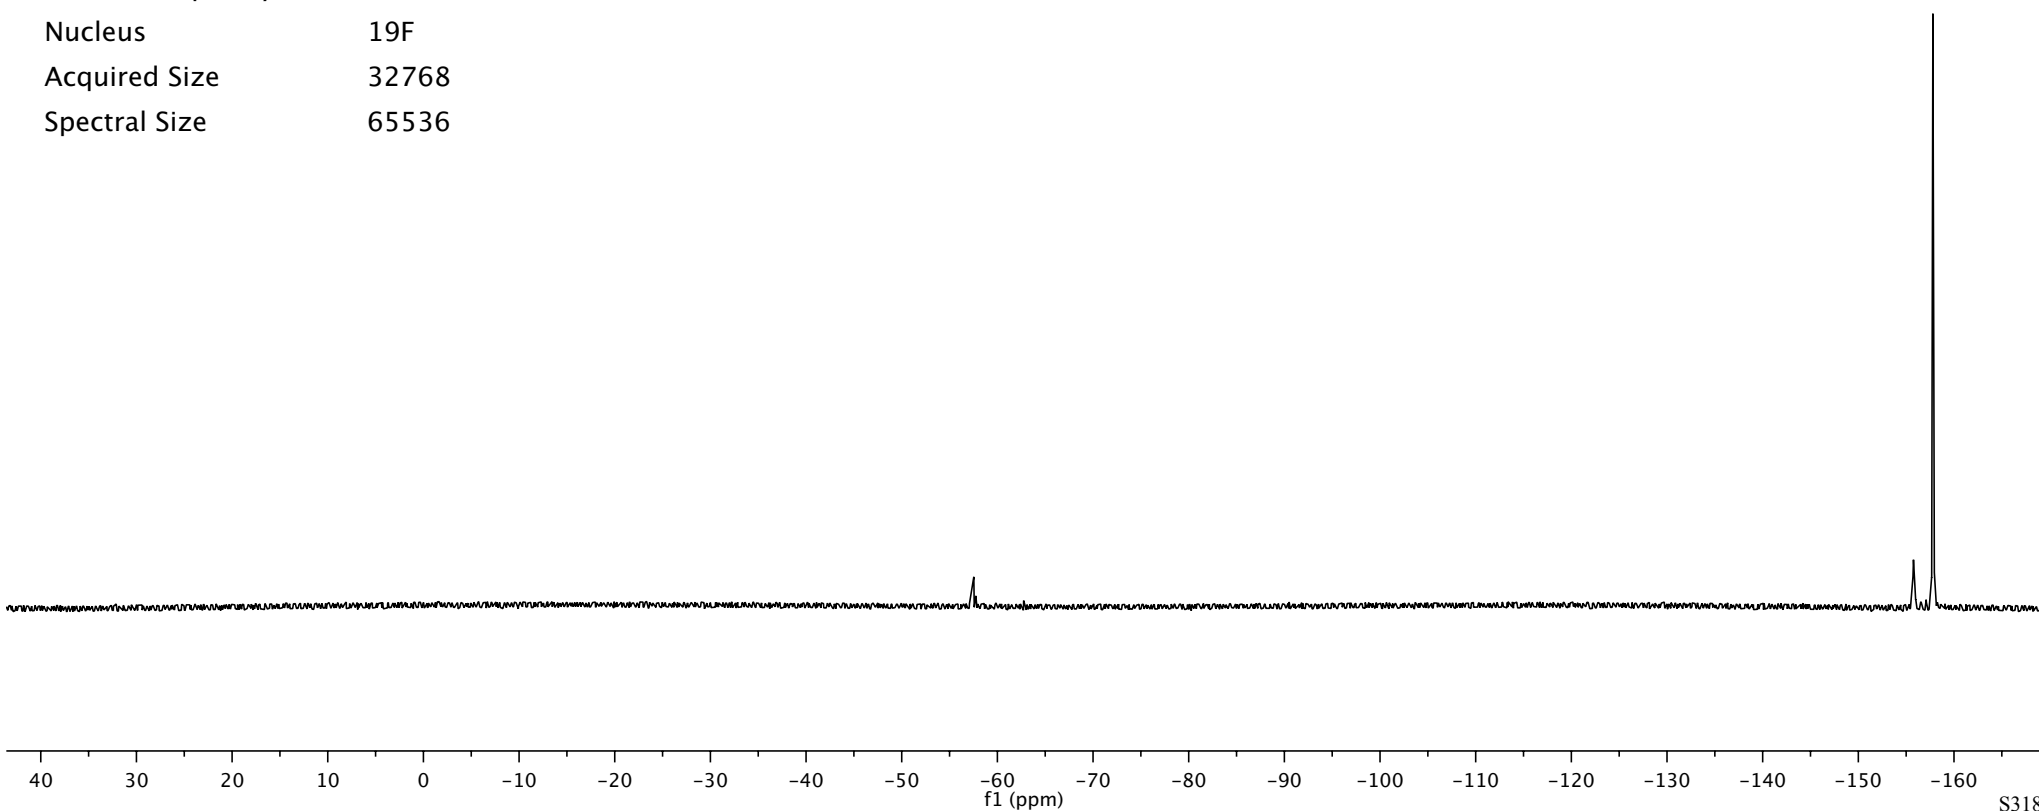

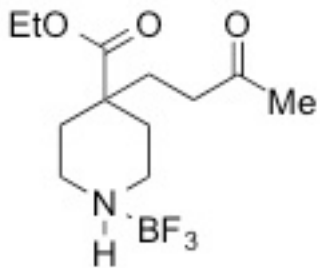

157.79  
157.83  
157.86  
157.89

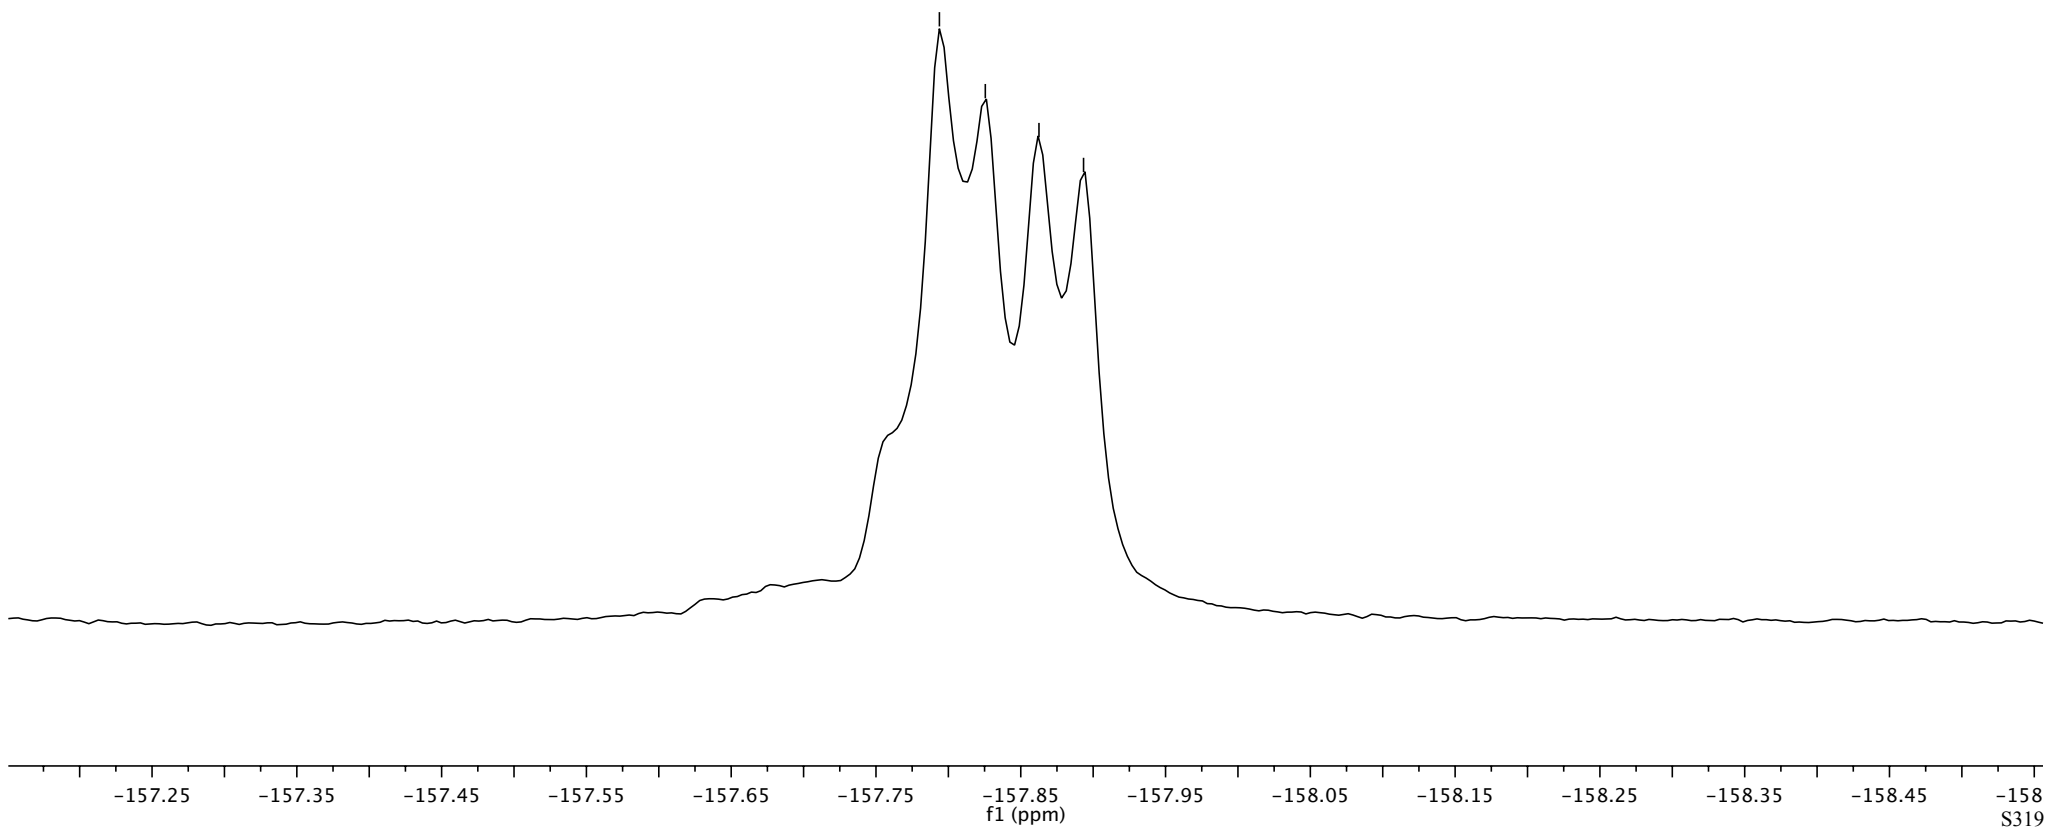



| Parameter              | Value   |
|------------------------|---------|
| Origin                 | Varian  |
| Spectrometer           | inova   |
| Solvent                | CDCl3   |
| Temperature            | 20.0    |
| Pulse Sequence         | s2pul   |
| Experiment             | 1D      |
| Probe                  | quadbp  |
| Receiver Gain          | 58      |
| Relaxation Delay       | 0.0000  |
| Pulse Width            | 0.0000  |
| Acquisition Time       | 4.0960  |
| Spectrometer Frequency | 399.74  |
| Spectral Width         | 8000.0  |
| Lowest Frequency       | -2426.3 |
| Nucleus                | 1H      |
| Acquired Size          | 32768   |
| Spectral Size          | 65536   |

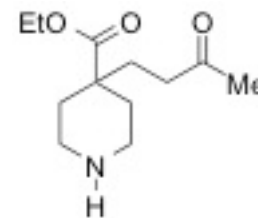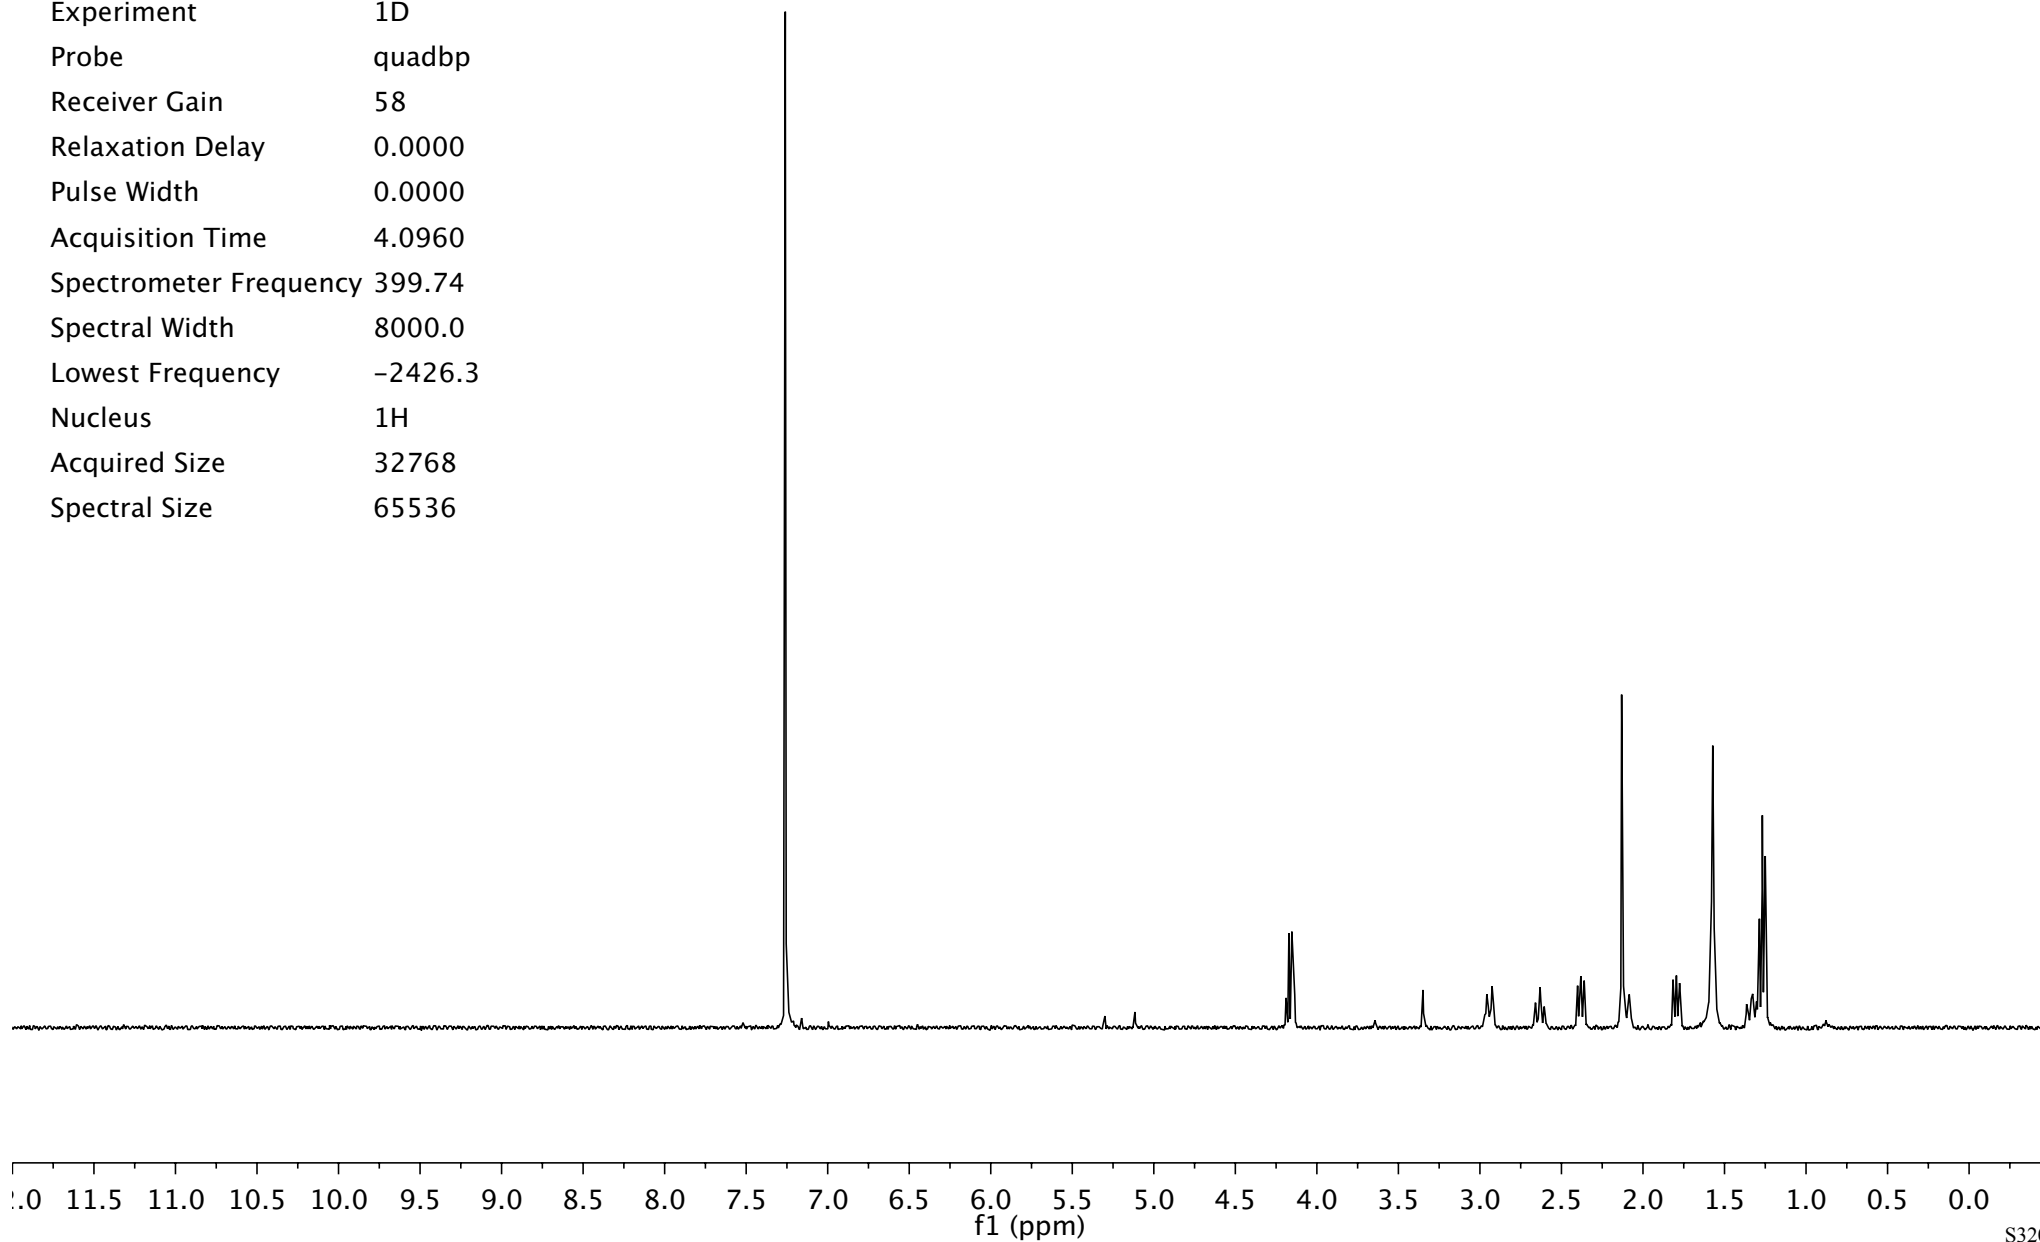

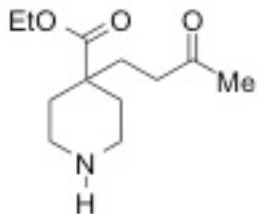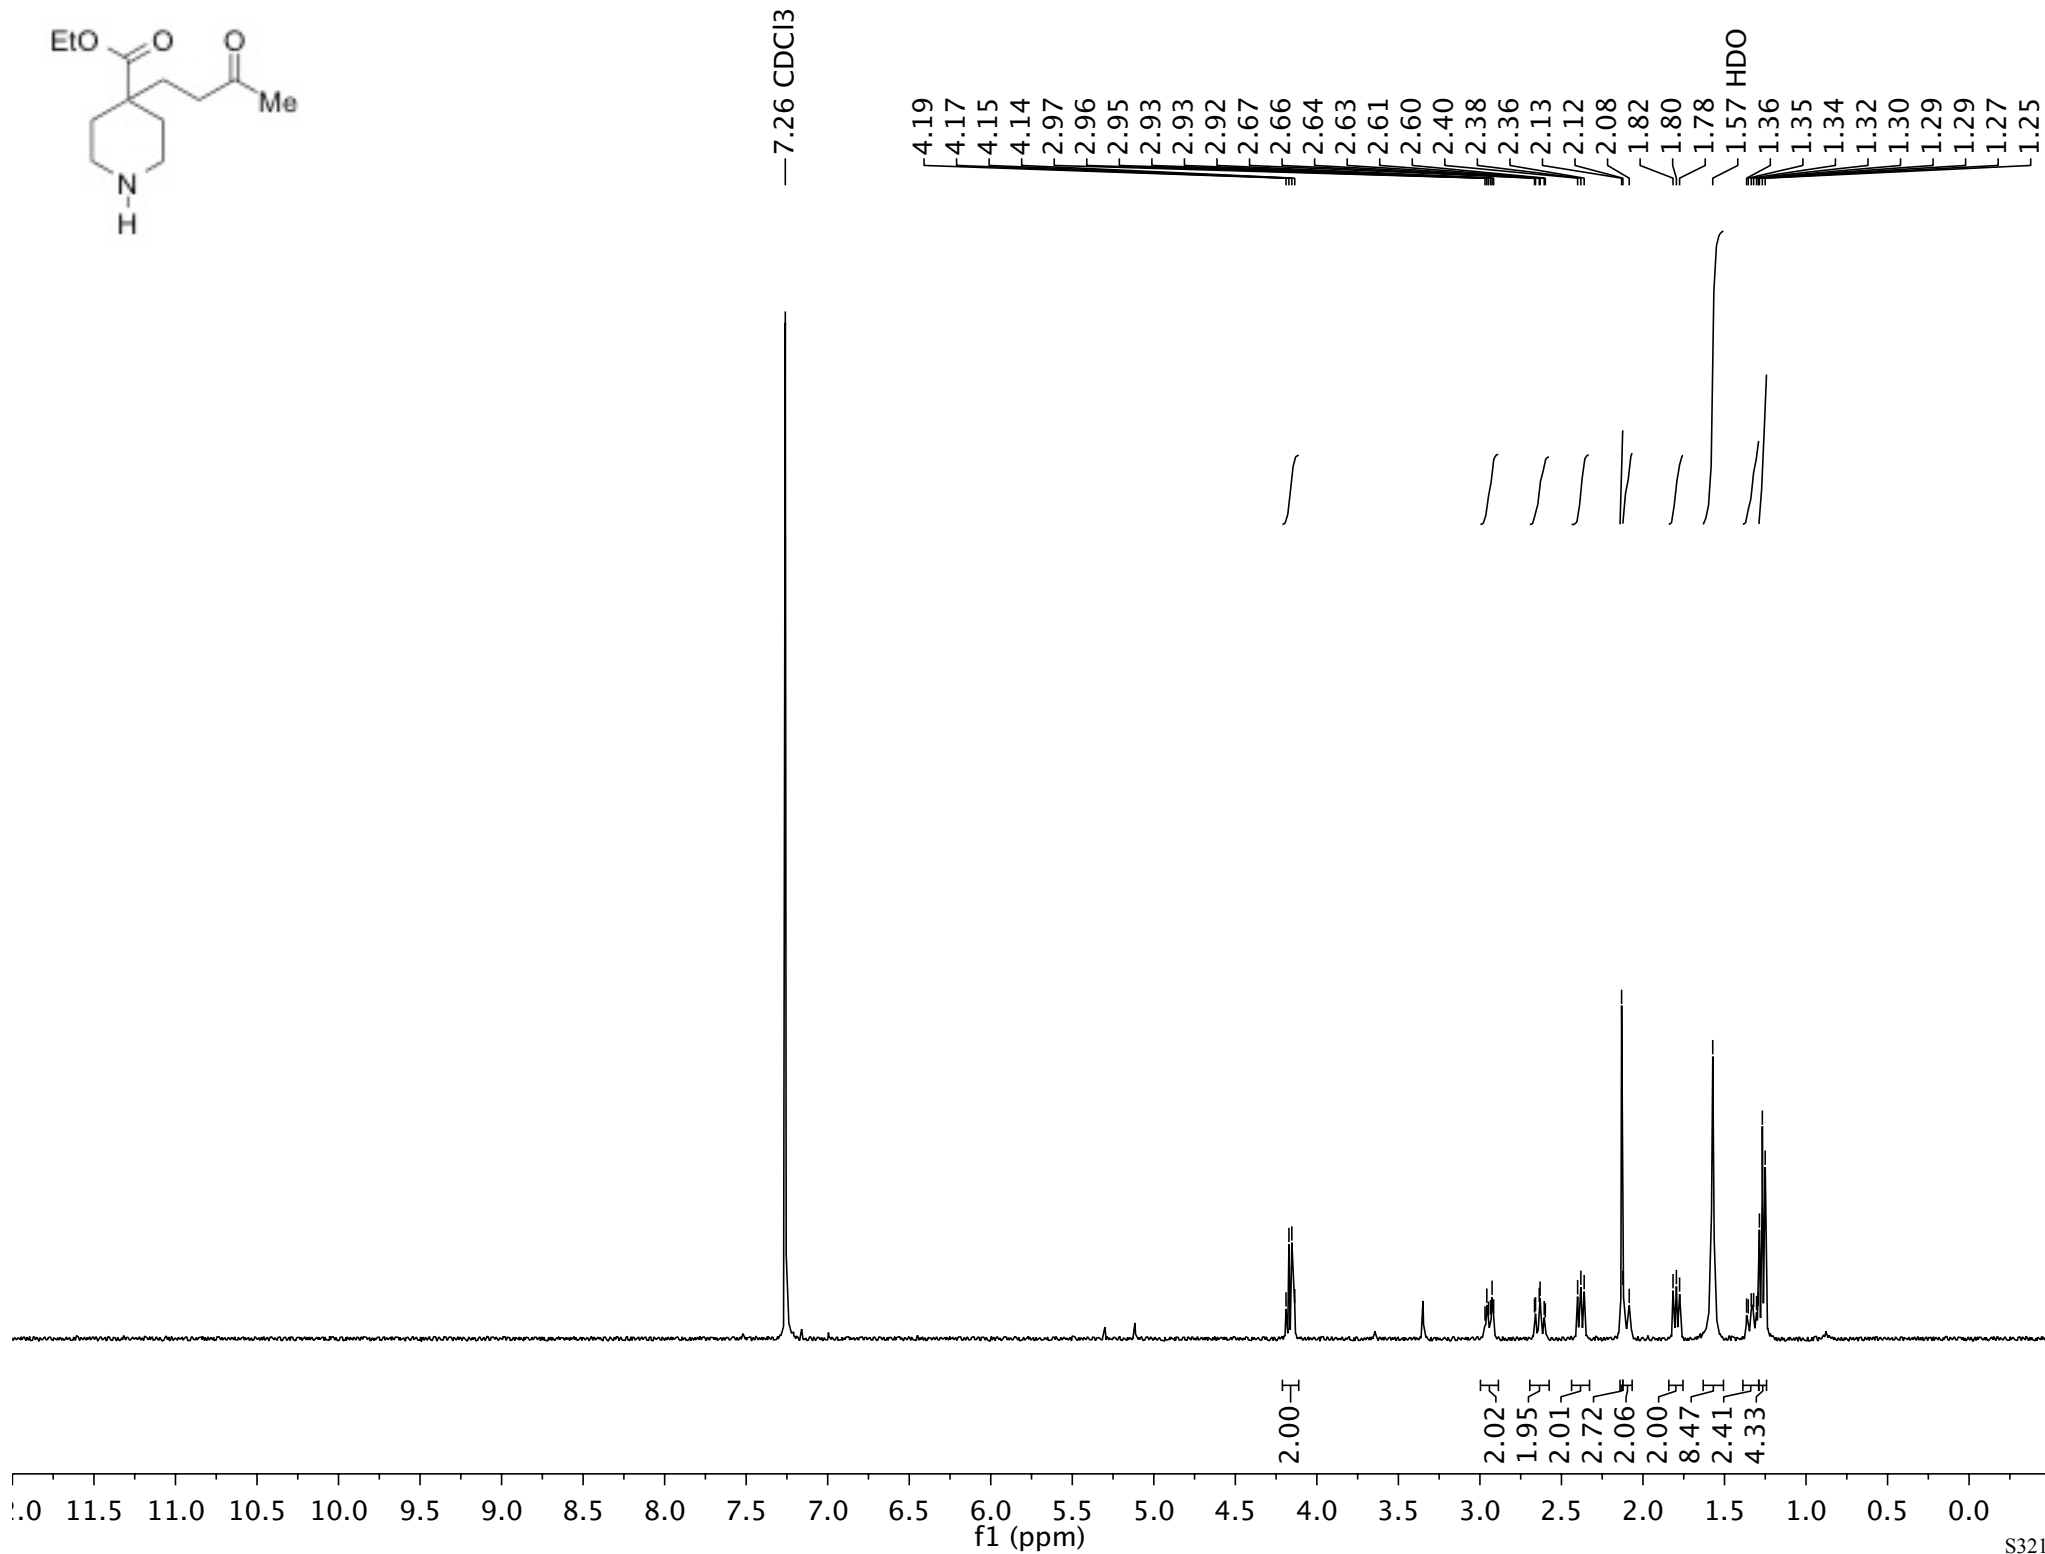

| Parameter              | Value   |
|------------------------|---------|
| Origin                 | Varian  |
| Spectrometer           | inova   |
| Solvent                | CDCl3   |
| Temperature            | 20.0    |
| Pulse Sequence         | s2pul   |
| Experiment             | 1D      |
| Probe                  | QUADG   |
| Receiver Gain          | 56      |
| Relaxation Delay       | 0.0000  |
| Pulse Width            | 0.0000  |
| Acquisition Time       | 4.0960  |
| Spectrometer Frequency | 499.43  |
| Spectral Width         | 8000.0  |
| Lowest Frequency       | -1518.7 |
| Nucleus                | 1H      |
| Acquired Size          | 32768   |
| Spectral Size          | 65536   |

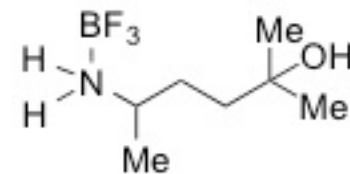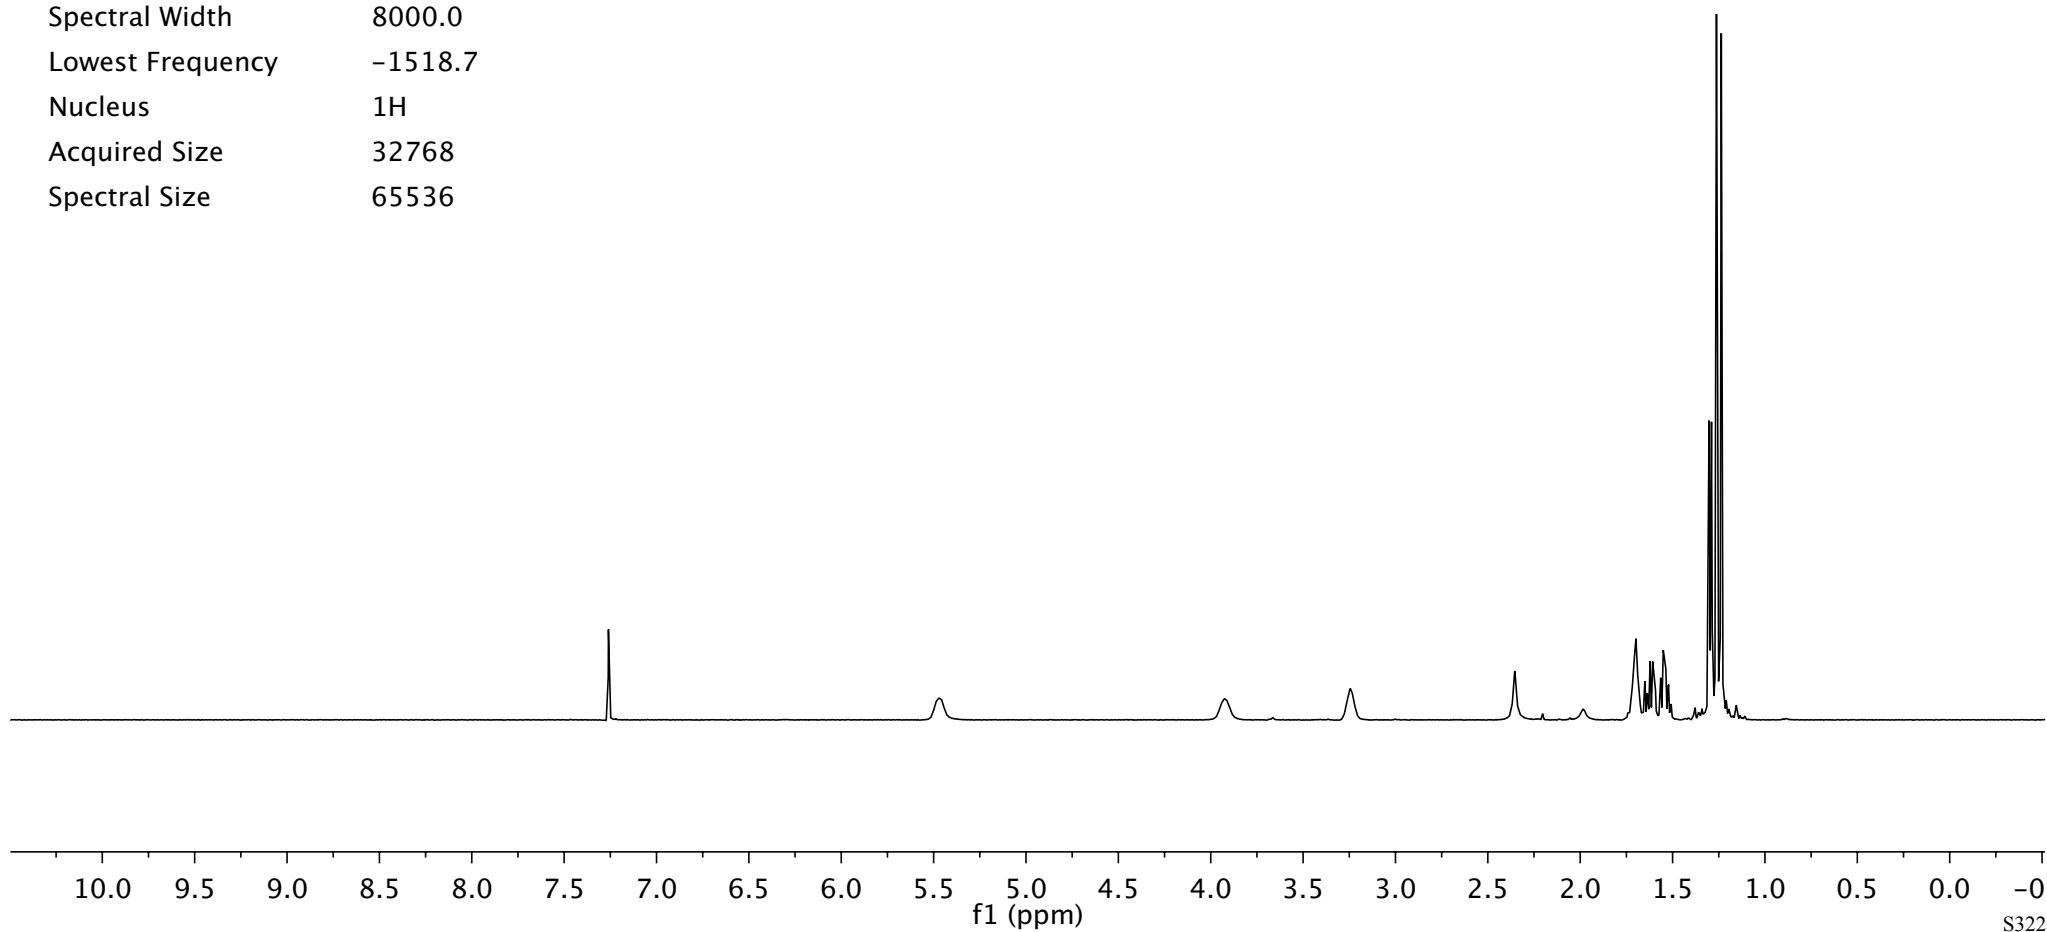

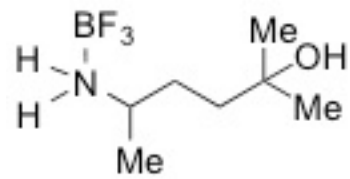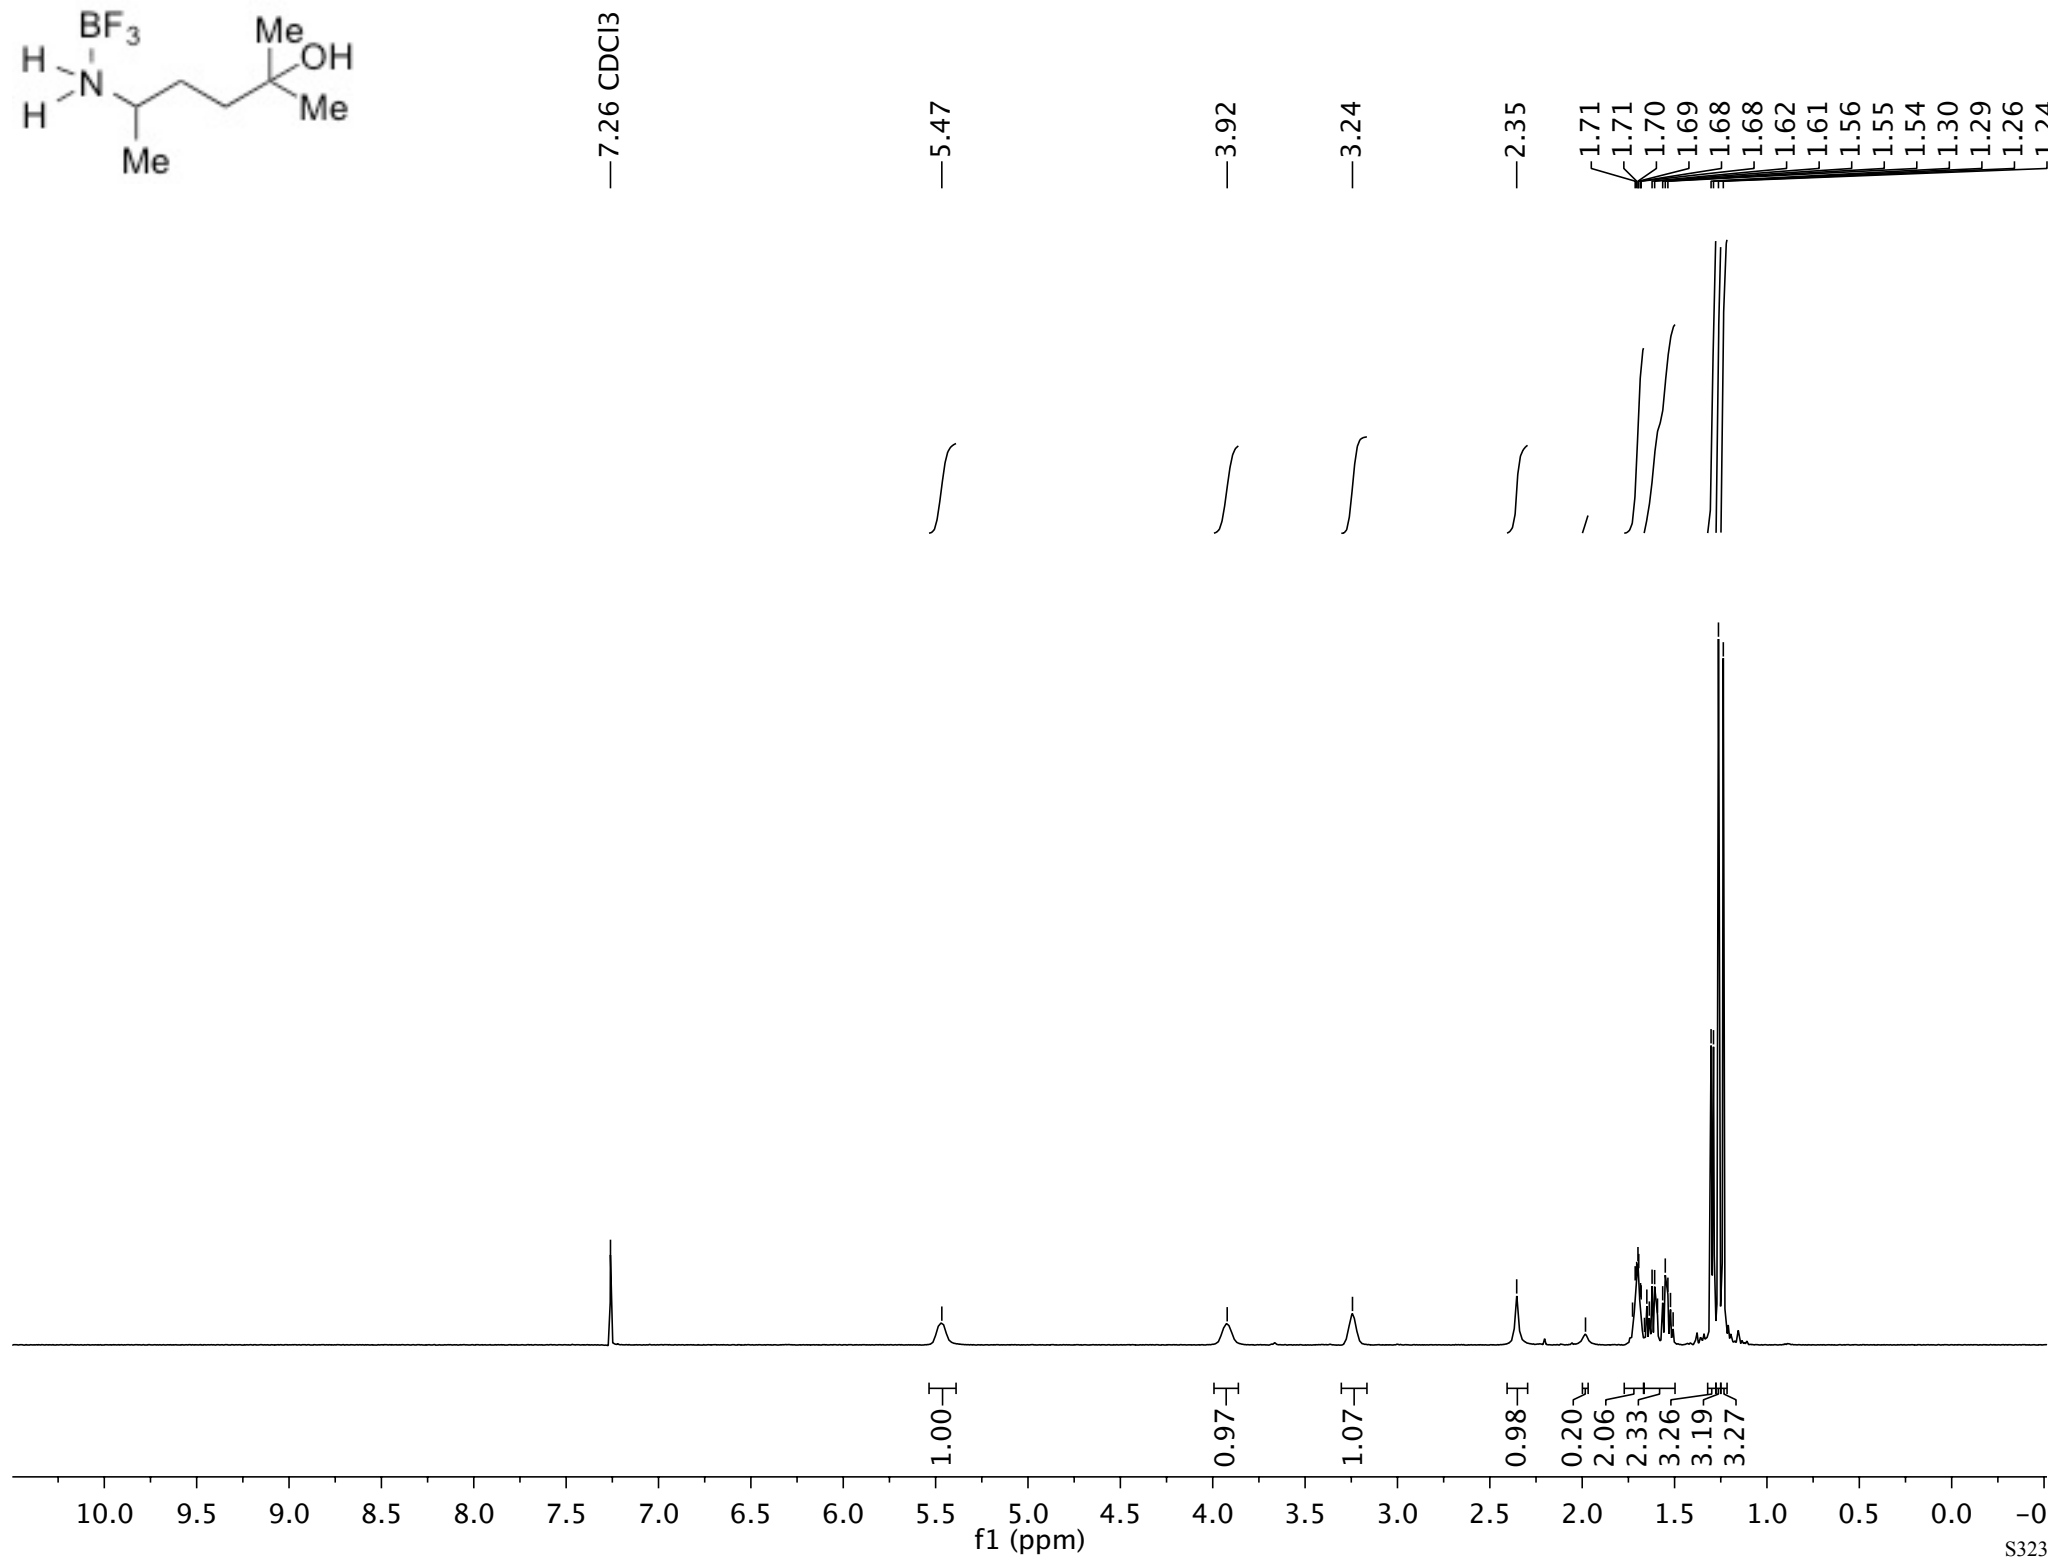

| Parameter              | Value           |
|------------------------|-----------------|
| Origin                 | Varian          |
| Spectrometer           | inova           |
| Solvent                | CDCl3           |
| Temperature            | 20.0            |
| Pulse Sequence         | s2pul           |
| Experiment             | 1D              |
| Probe                  | QUADG           |
| Receiver Gain          | 60              |
| Relaxation Delay       | 2.0000          |
| Pulse Width            | 0.0000          |
| Acquisition Time       | 1.0240          |
| Spectrometer Frequency | 125.60          |
| Spectral Width         | 32000.0         |
| Lowest Frequency       | -2200.8         |
| Nucleus                | <sup>13</sup> C |
| Acquired Size          | 32768           |
| Spectral Size          | 65536           |

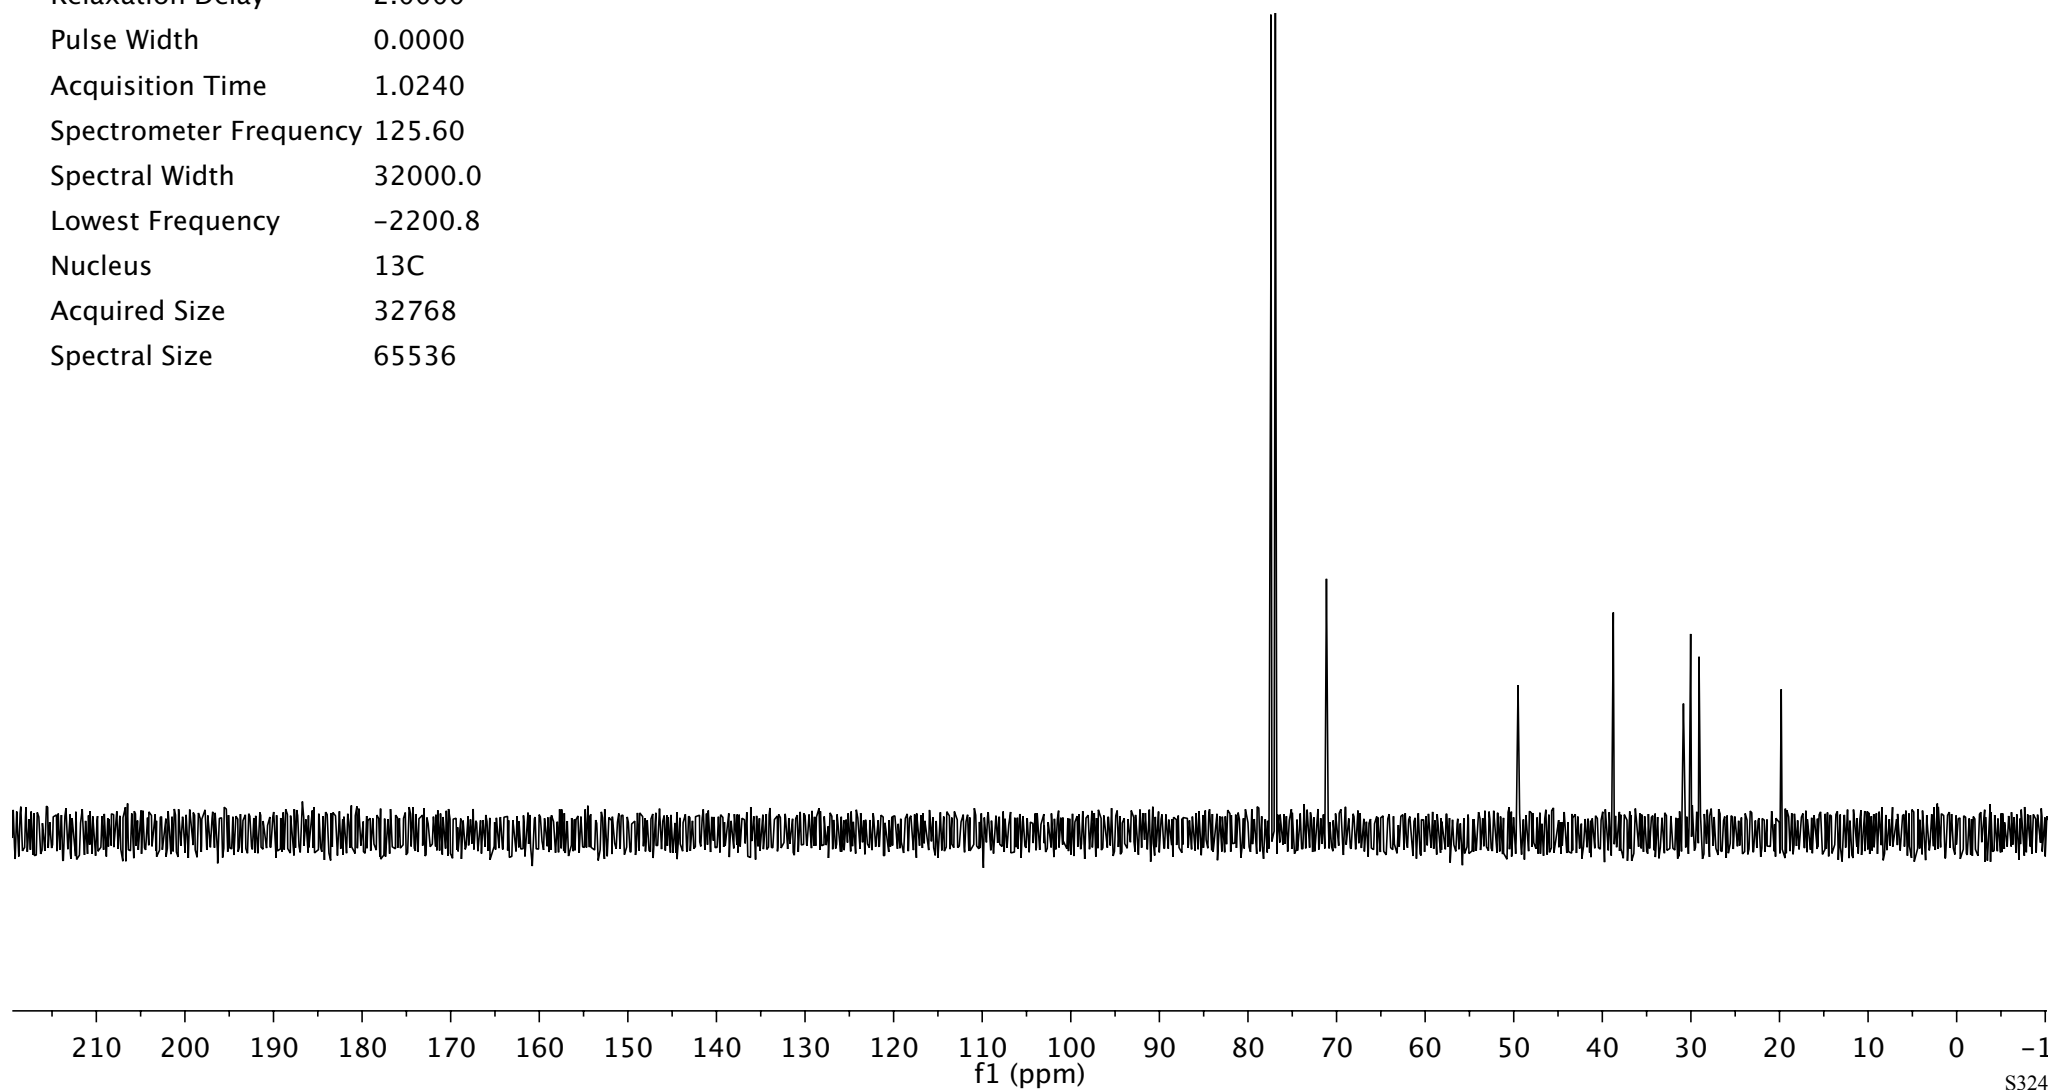

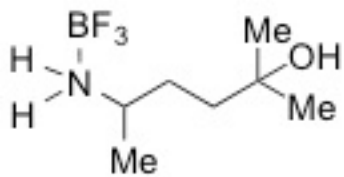

77.41 CDCl<sub>3</sub>  
77.16 CDCl<sub>3</sub>  
76.91 CDCl<sub>3</sub>  
71.14

49.51

38.76

30.84

30.03

29.08

19.80

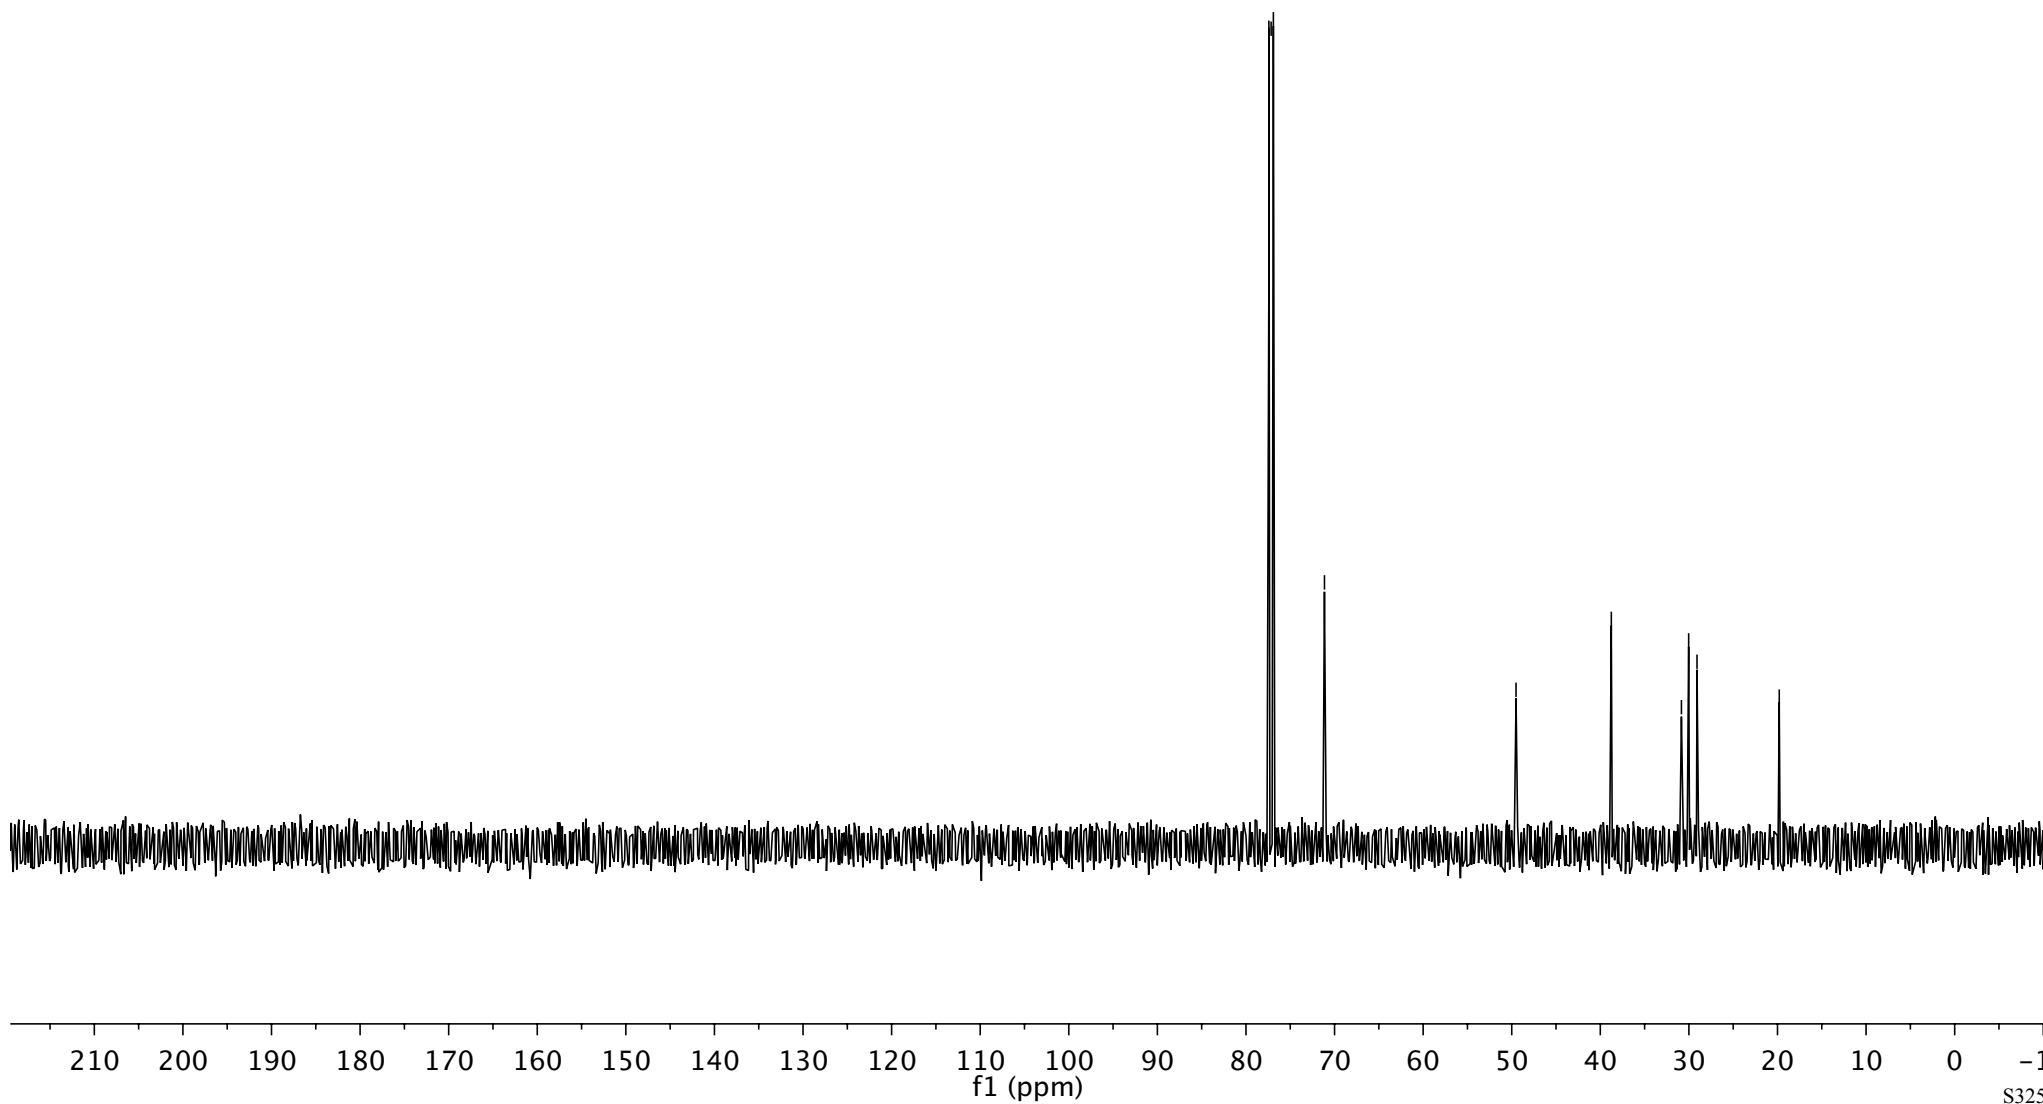

| Parameter              | Value     |
|------------------------|-----------|
| Origin                 | Varian    |
| Spectrometer           | inova     |
| Solvent                | CDCl3     |
| Temperature            | 20.0      |
| Pulse Sequence         | s2pul     |
| Experiment             | 1D        |
| Probe                  | QUADG     |
| Receiver Gain          | 56        |
| Relaxation Delay       | 1.5000    |
| Pulse Width            | 0.0000    |
| Acquisition Time       | 0.3277    |
| Spectrometer Frequency | 469.89    |
| Spectral Width         | 122137.4  |
| Lowest Frequency       | -108111.4 |
| Nucleus                | 19F       |
| Acquired Size          | 40022     |
| Spectral Size          | 131072    |

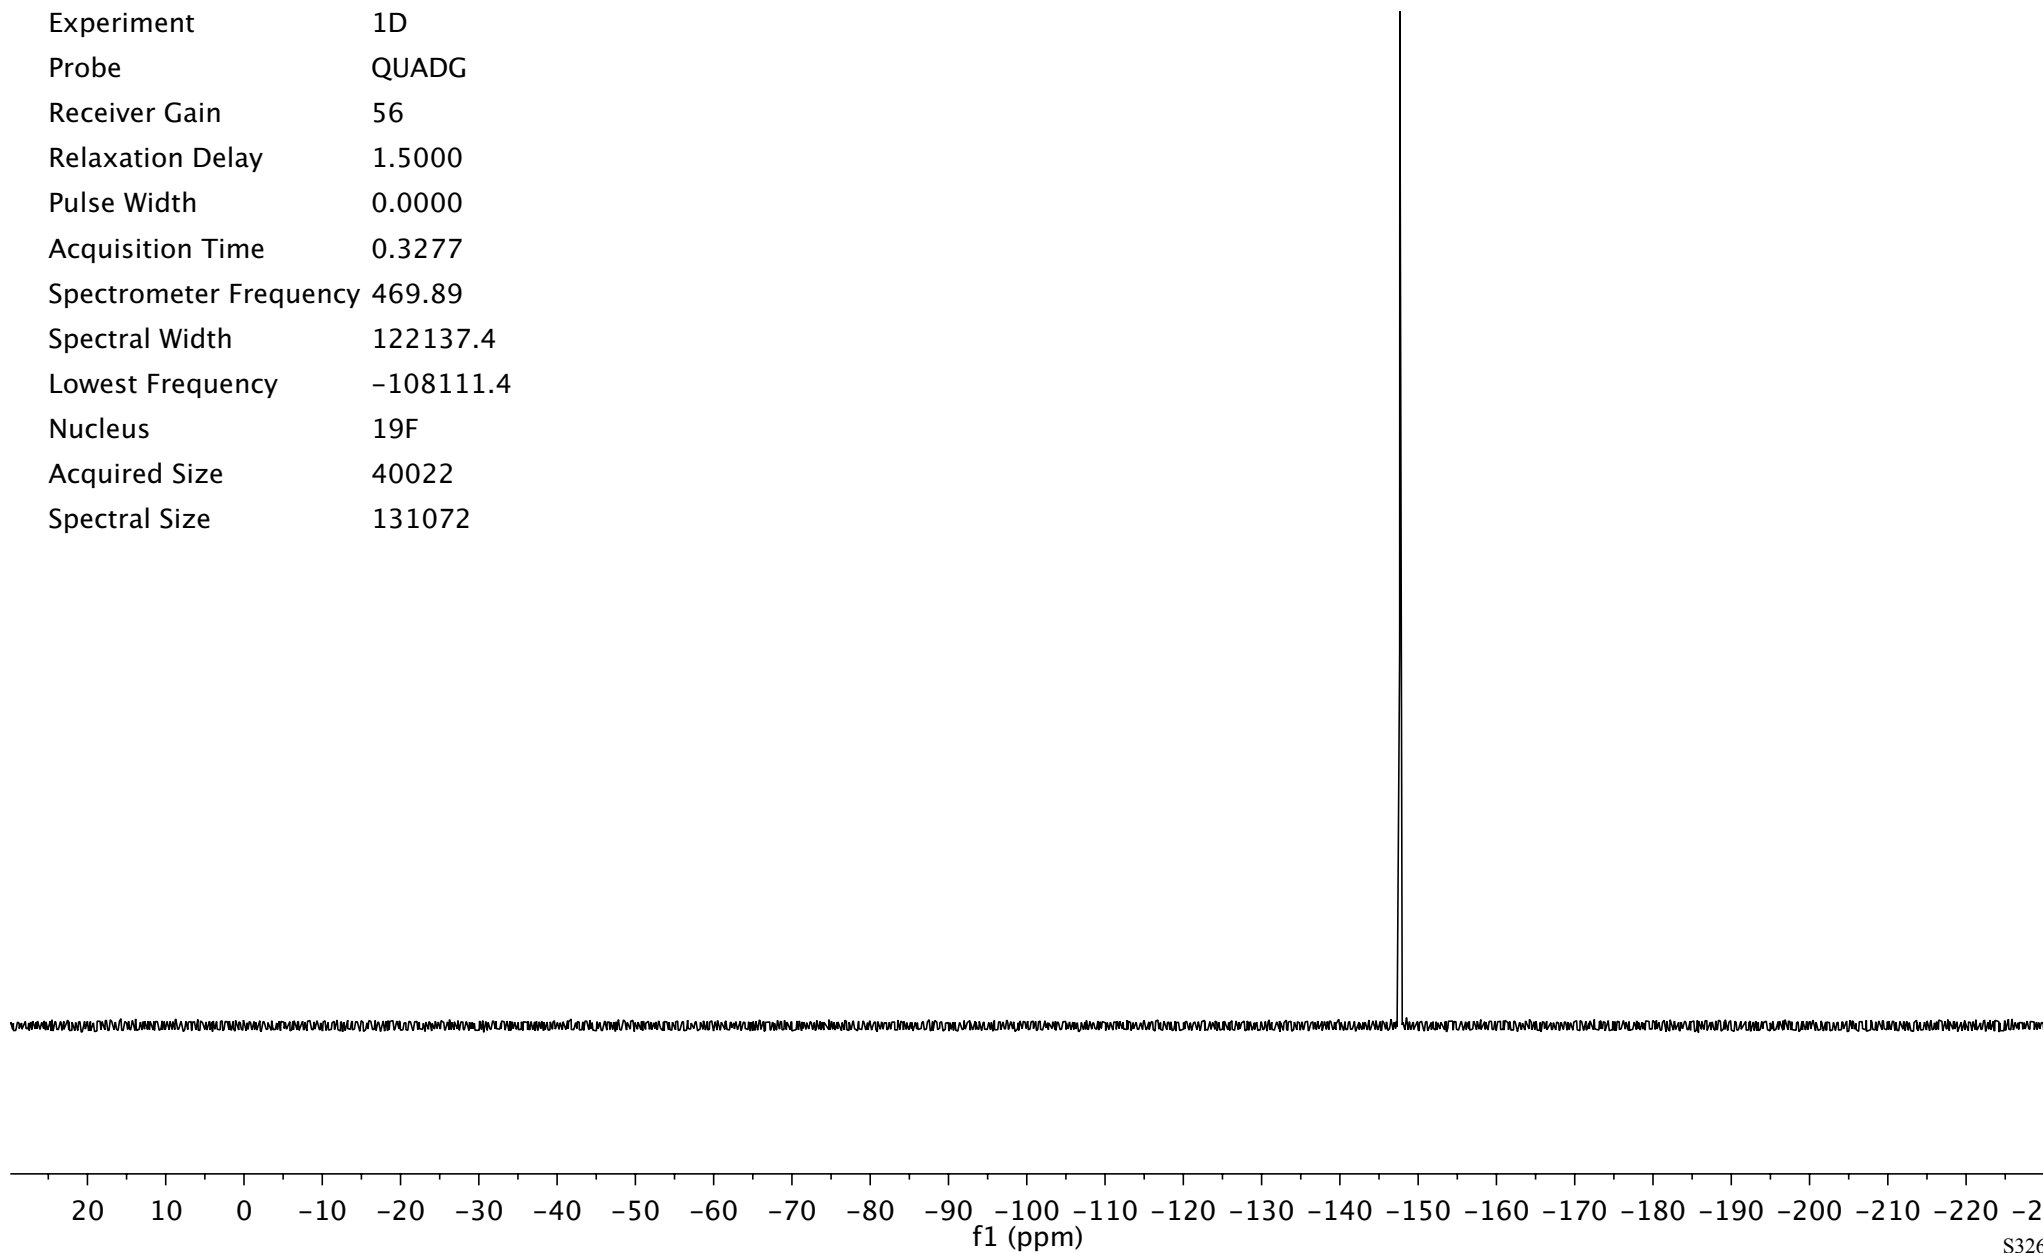

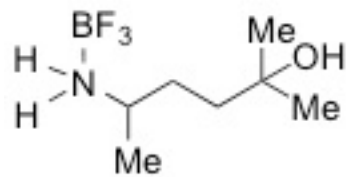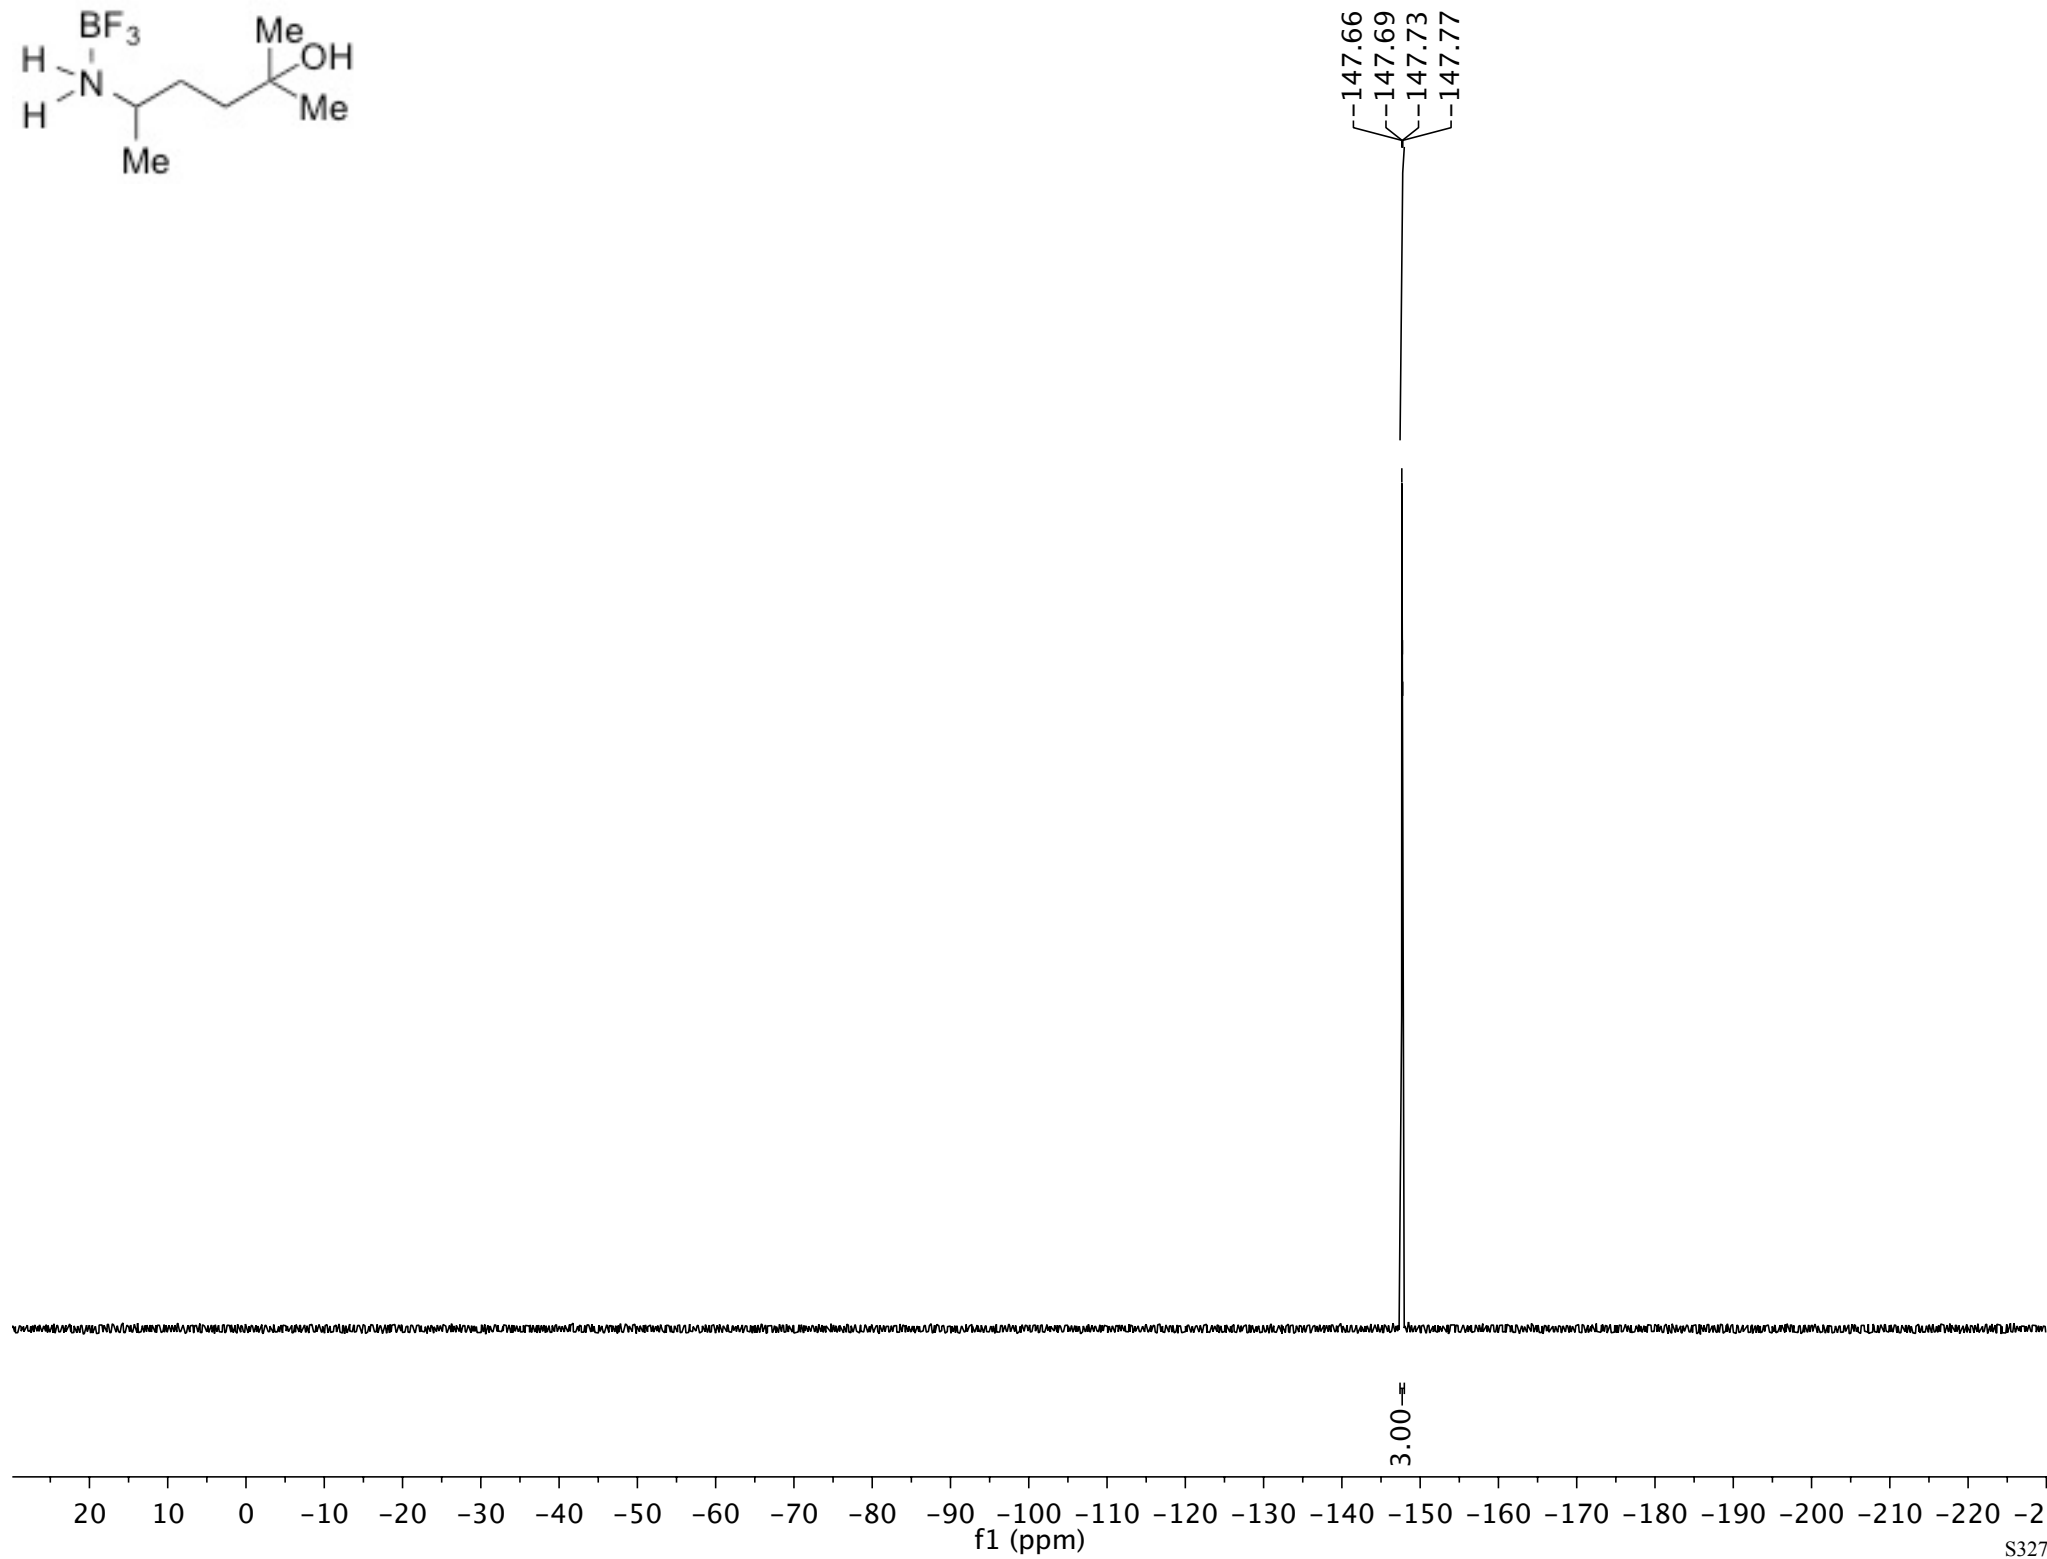



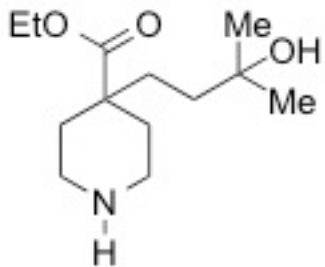

— 7.26 CDCl<sub>3</sub>

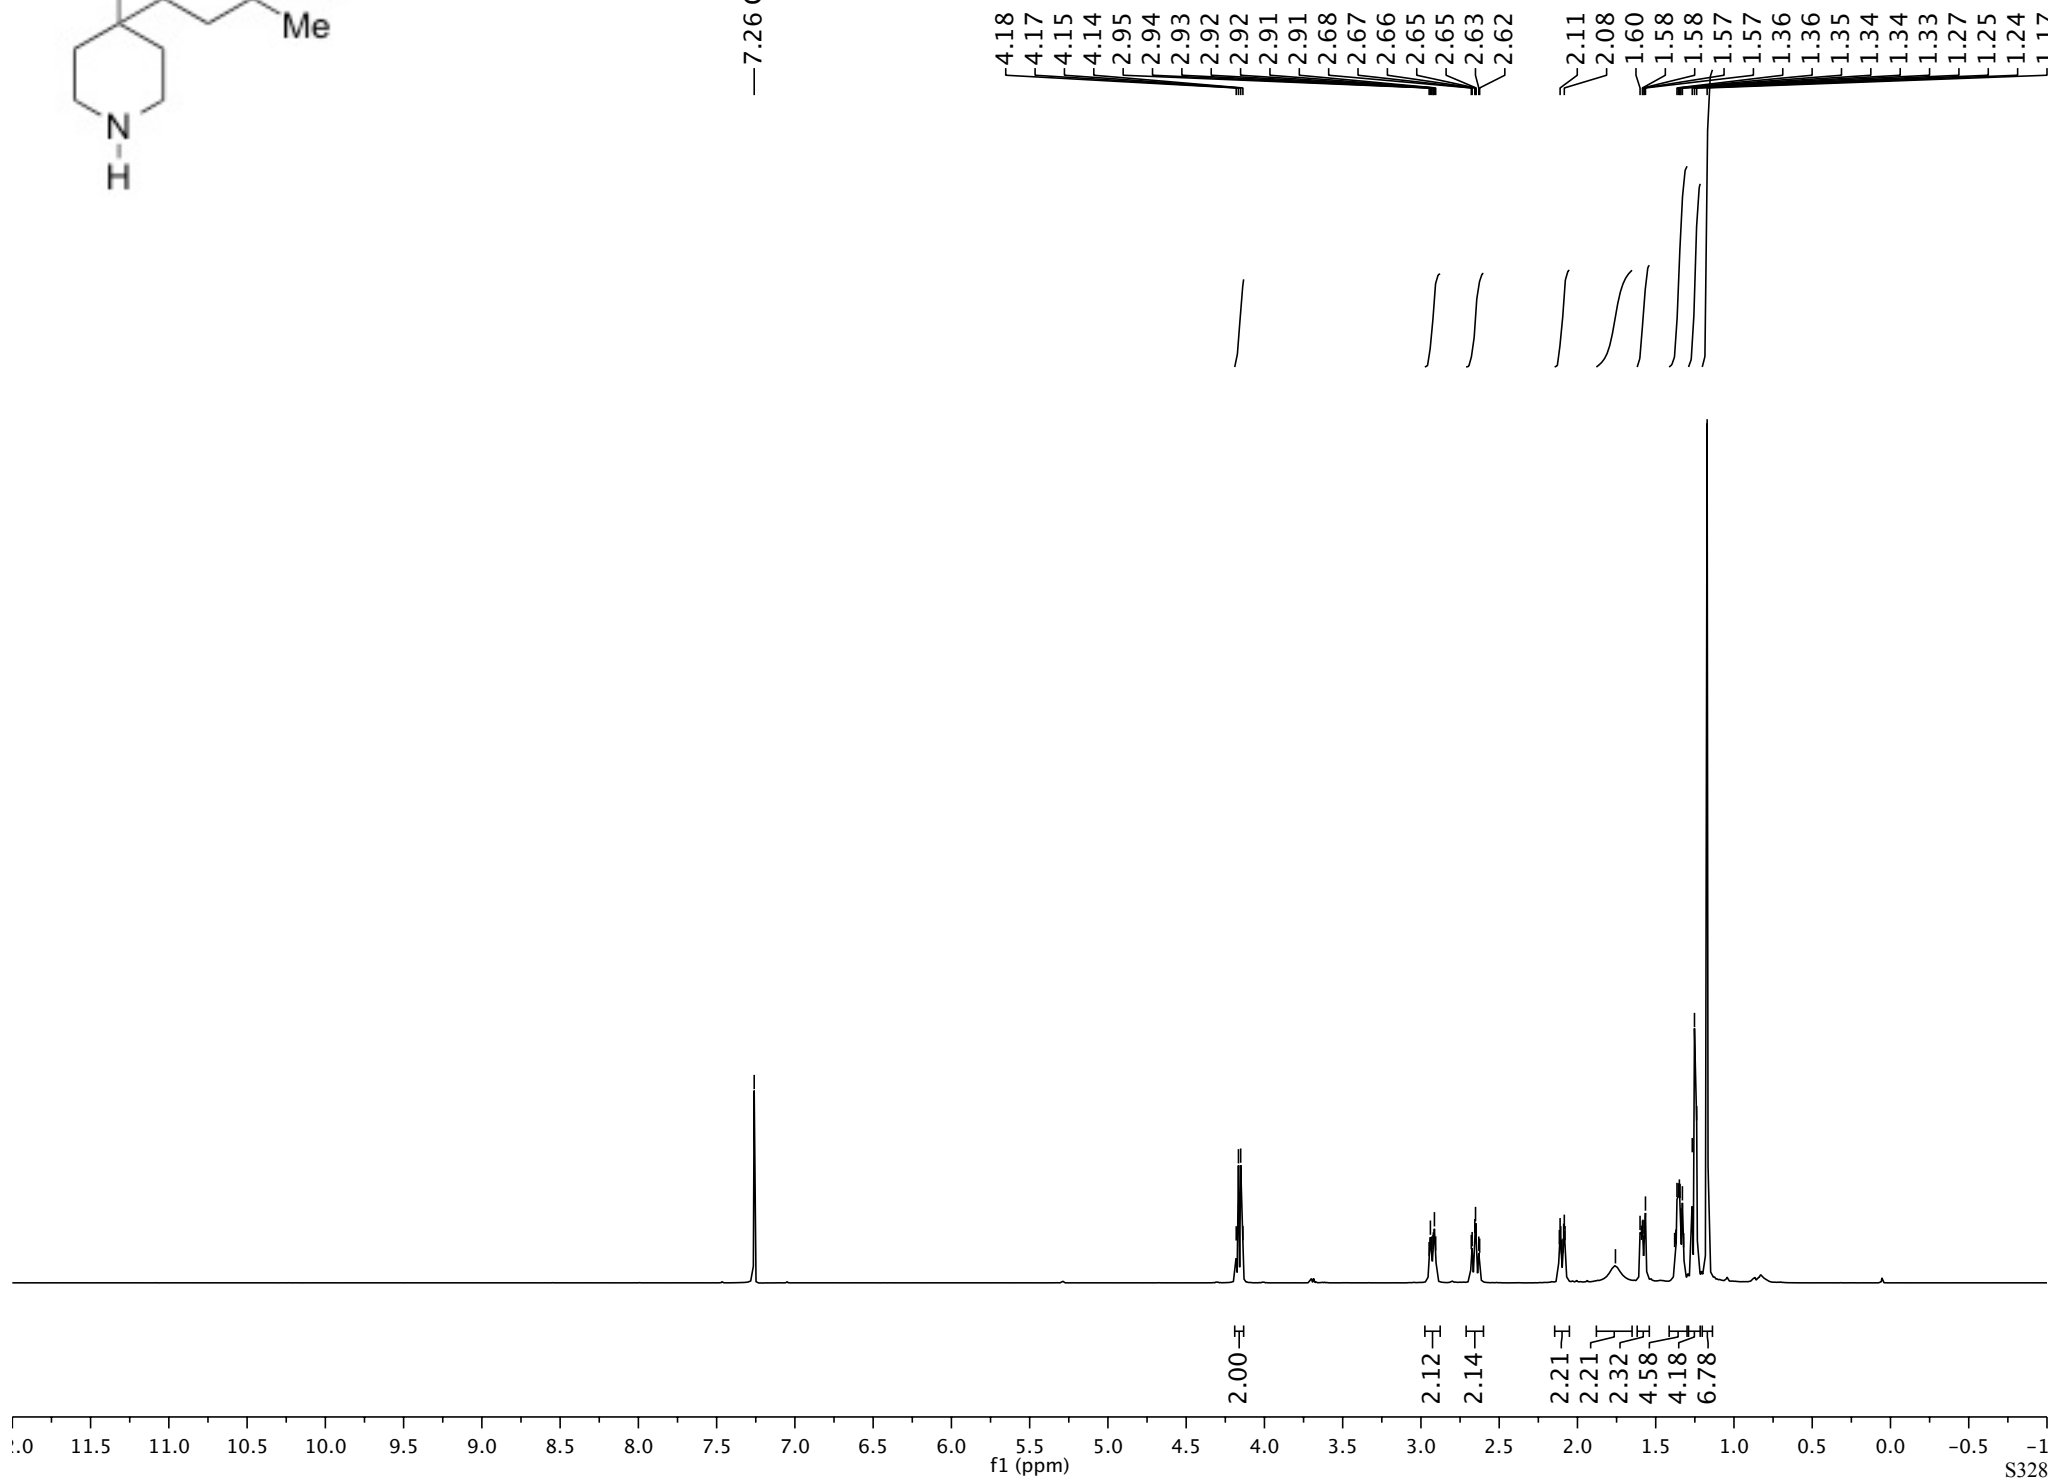

| Parameter              | Value          |
|------------------------|----------------|
| Origin                 | Varian         |
| Spectrometer           | inova          |
| Solvent                | CDCl3          |
| Temperature            | 20.0           |
| Pulse Sequence         | s2pul          |
| Experiment             | 1D             |
| Probe                  | hcn            |
| Number of Scans        | 16             |
| Receiver Gain          | 28             |
| Relaxation Delay       | 2.0000         |
| Pulse Width            | 0.0000         |
| Acquisition Time       | 4.0960         |
| Spectrometer Frequency | 500.07         |
| Spectral Width         | 8000.0         |
| Lowest Frequency       | -1521.1        |
| Nucleus                | <sup>1</sup> H |
| Acquired Size          | 32768          |
| Spectral Size          | 65536          |

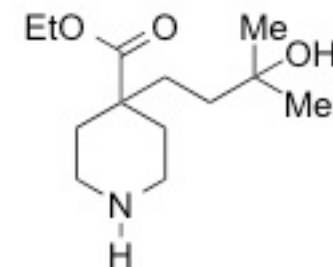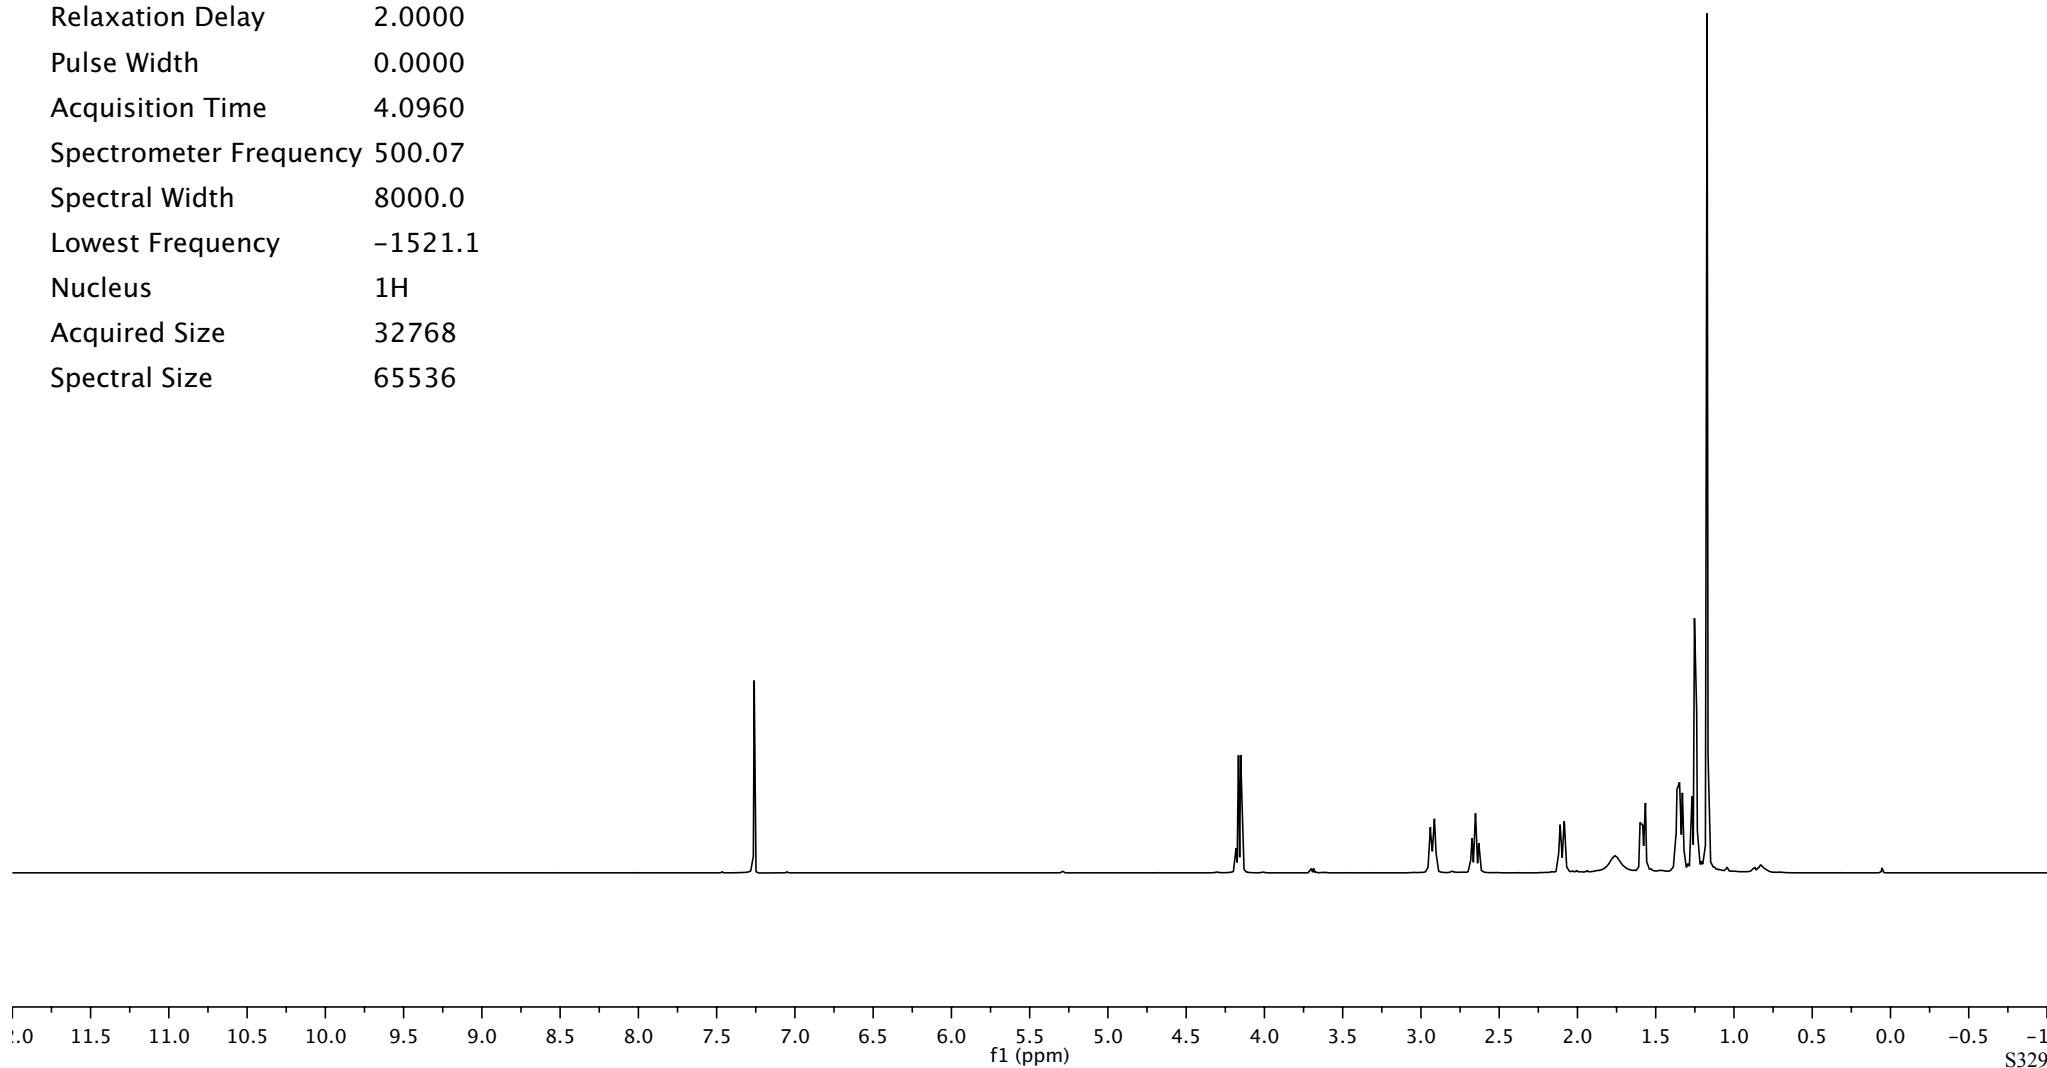

| Parameter              | Value           |
|------------------------|-----------------|
| Origin                 | Varian          |
| Spectrometer           | inova           |
| Solvent                | CDCl3           |
| Temperature            | 20.0            |
| Pulse Sequence         | s2pul           |
| Experiment             | 1D              |
| Probe                  | QUAD            |
| Number of Scans        | 11999           |
| Receiver Gain          | 60              |
| Relaxation Delay       | 2.0000          |
| Pulse Width            | 0.0000          |
| Acquisition Time       | 1.0863          |
| Spectrometer Frequency | 125.66          |
| Spectral Width         | 30165.9         |
| Lowest Frequency       | -1273.8         |
| Nucleus                | <sup>13</sup> C |
| Acquired Size          | 32768           |
| Spectral Size          | 65536           |

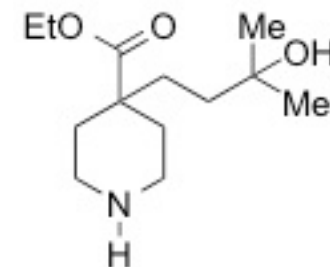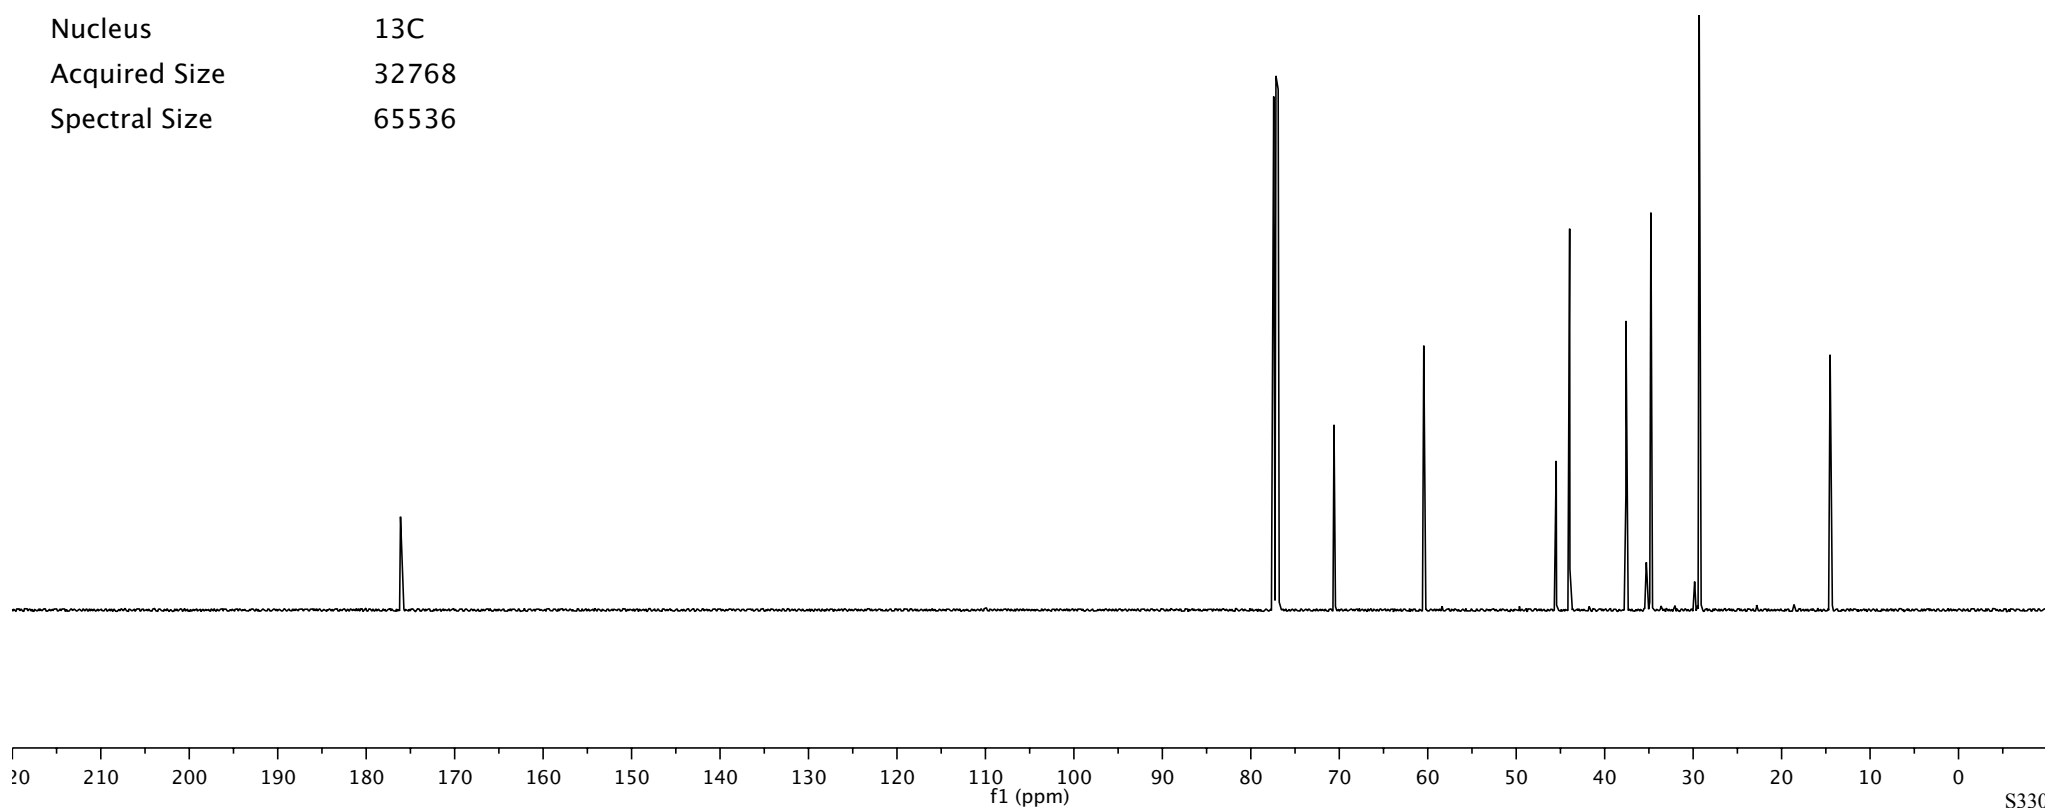



—176.12

—77.16 CDCl<sub>3</sub>

—70.59

—60.45

—45.48

—43.96

—37.59

—35.29

—34.78

—29.31

—14.52

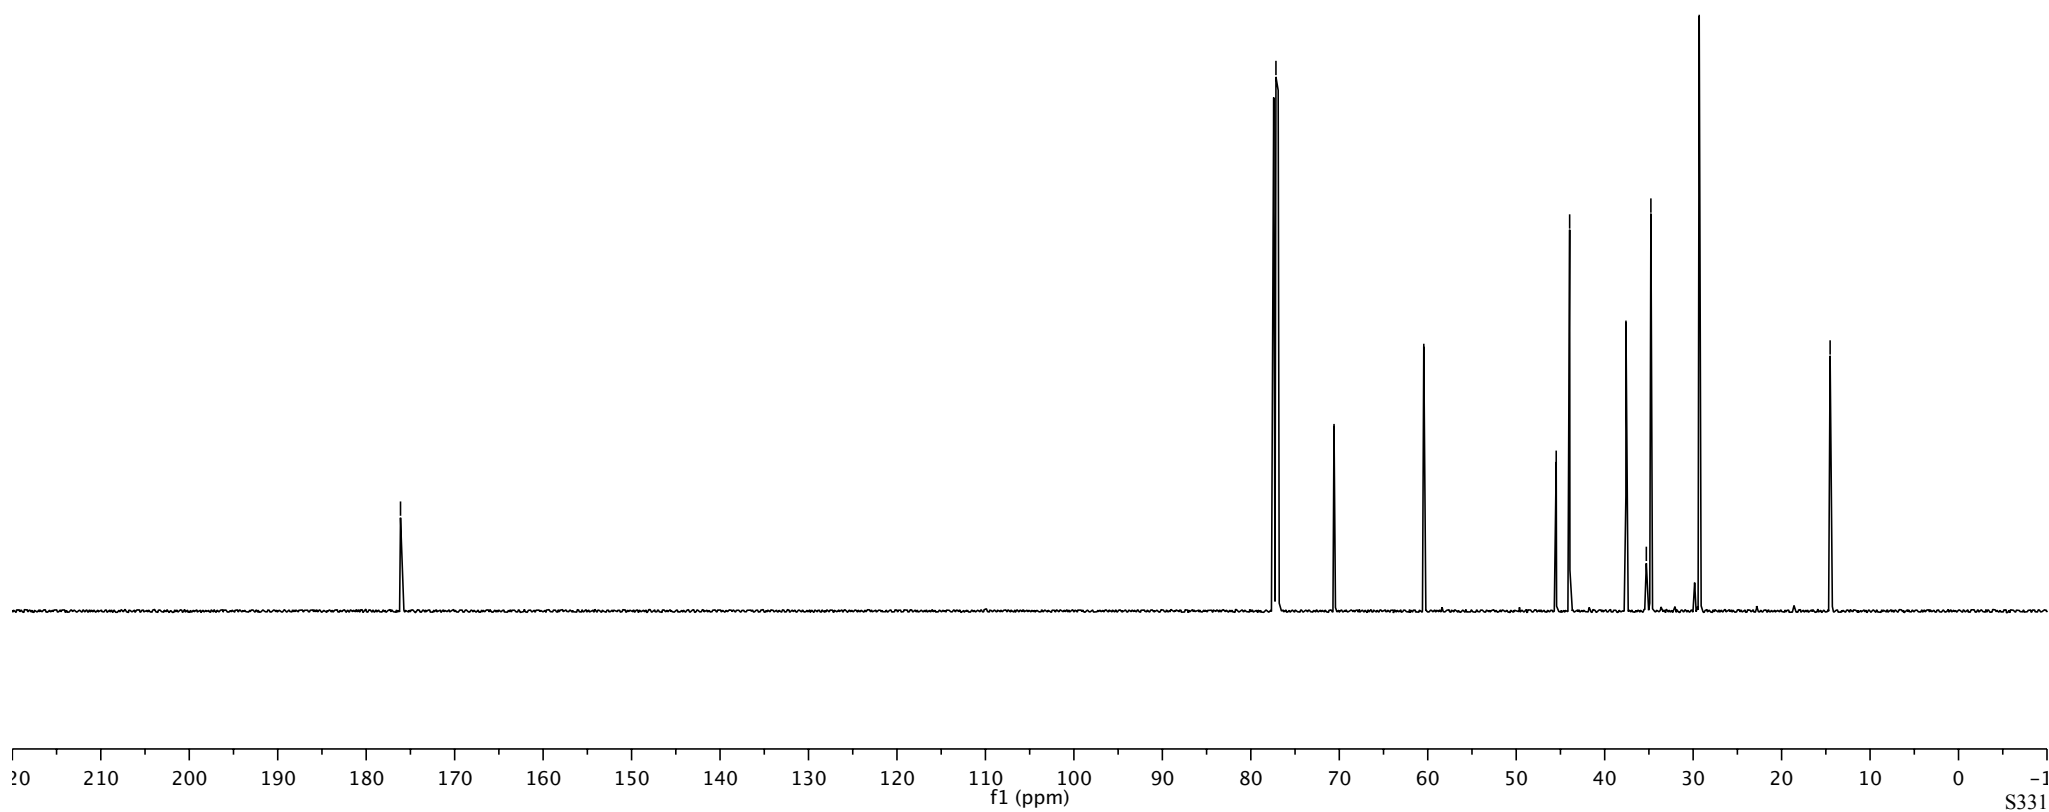

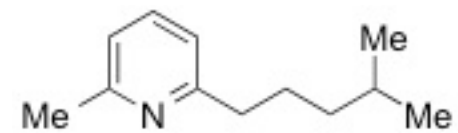

| Parameter              | Value          |
|------------------------|----------------|
| Origin                 | Varian         |
| Spectrometer           | inova          |
| Solvent                | CDCl3          |
| Temperature            | 20.0           |
| Pulse Sequence         | s2pul          |
| Experiment             | 1D             |
| Probe                  | QUAD           |
| Receiver Gain          | 42             |
| Relaxation Delay       | 5.0000         |
| Pulse Width            | 0.0000         |
| Acquisition Time       | 4.6645         |
| Spectrometer Frequency | 499.69         |
| Spectral Width         | 7024.9         |
| Lowest Frequency       | -1021.6        |
| Nucleus                | <sup>1</sup> H |
| Acquired Size          | 32768          |
| Spectral Size          | 65536          |

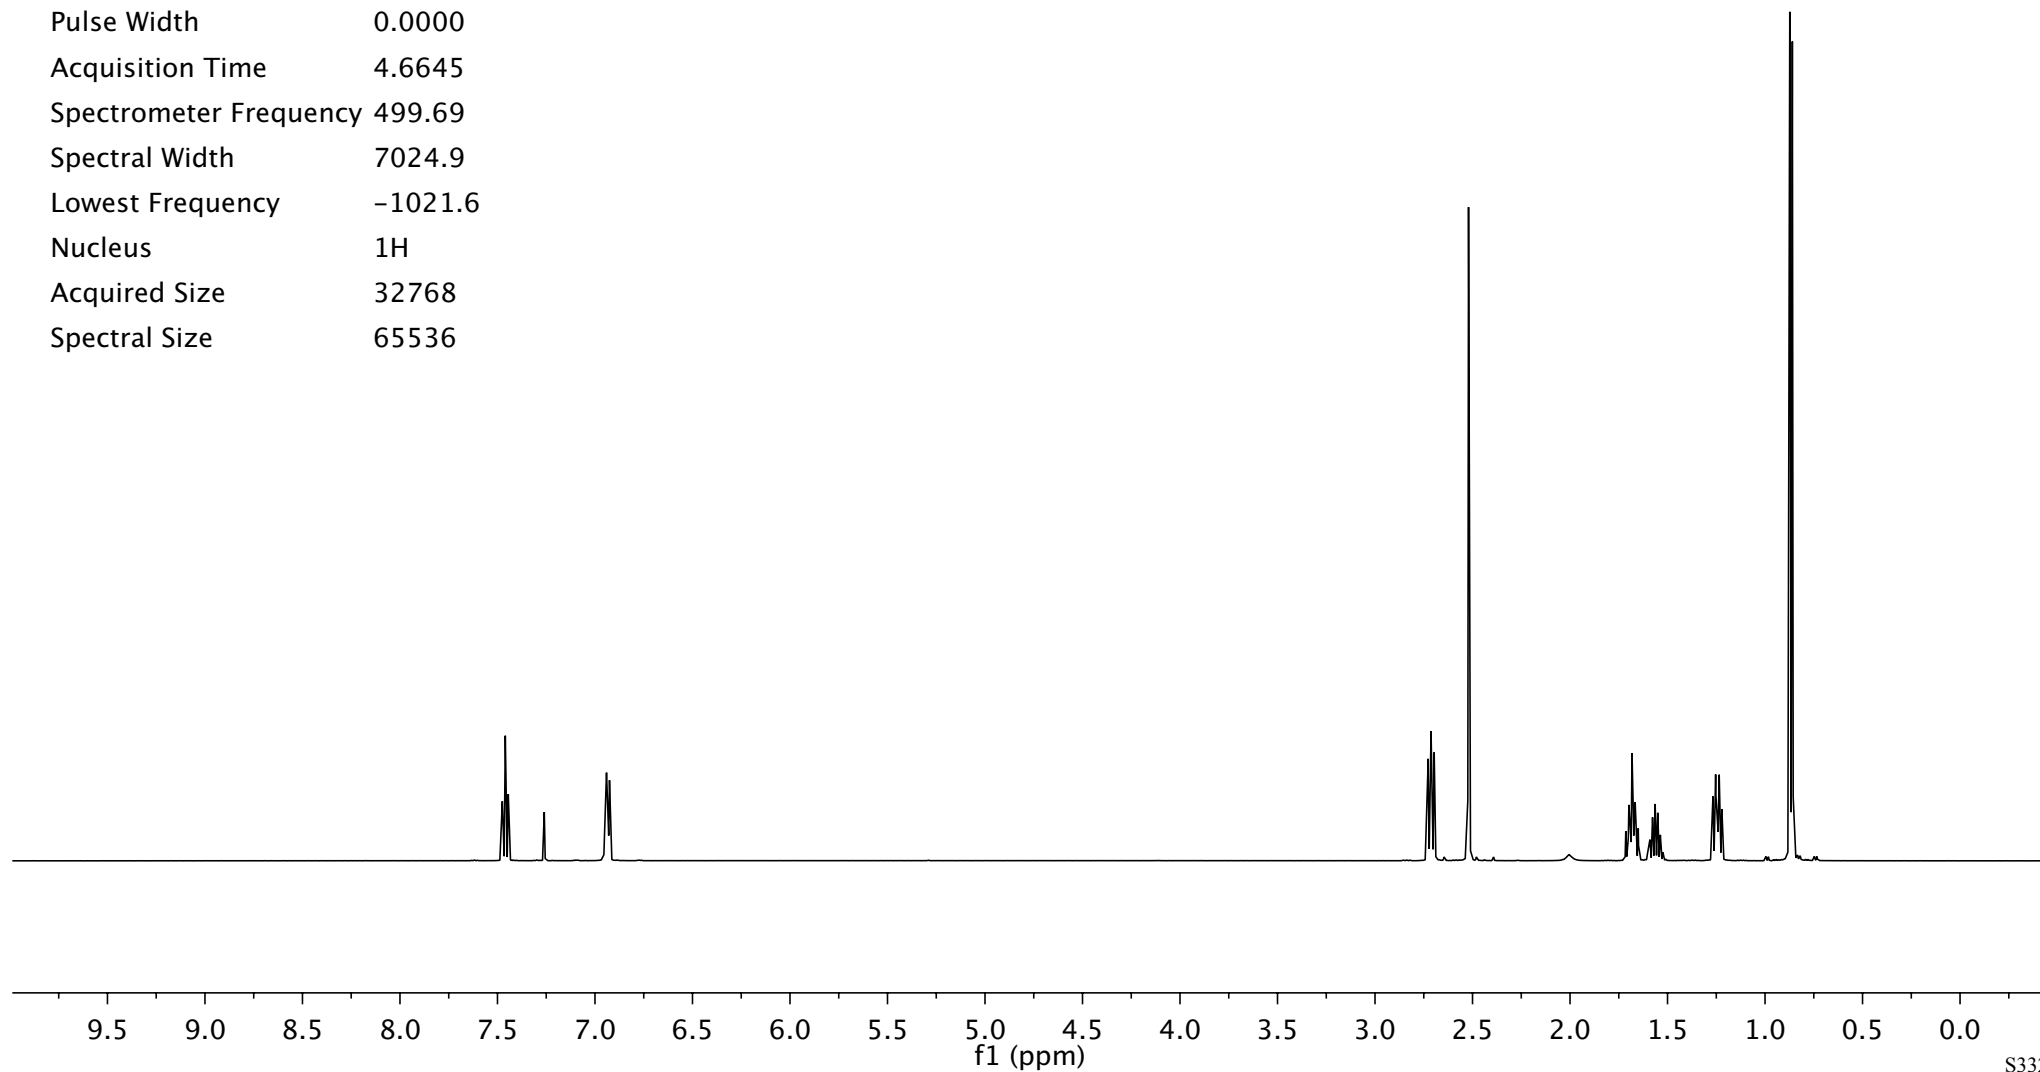

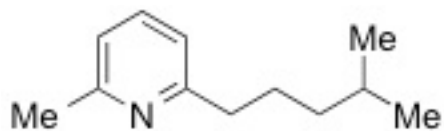

7.48  
7.46  
7.44  
7.26 CDCl<sub>3</sub>  
6.95  
6.94  
6.93  
6.93

2.73  
2.71  
2.70  
2.52  
2.01  
1.71  
1.70  
1.70  
1.69  
1.68  
1.67  
1.67  
1.67  
1.66  
1.65  
1.60  
1.59  
1.58  
1.56  
1.55  
1.54  
1.52  
1.27  
1.25  
1.24  
1.24  
1.22  
0.87  
0.86

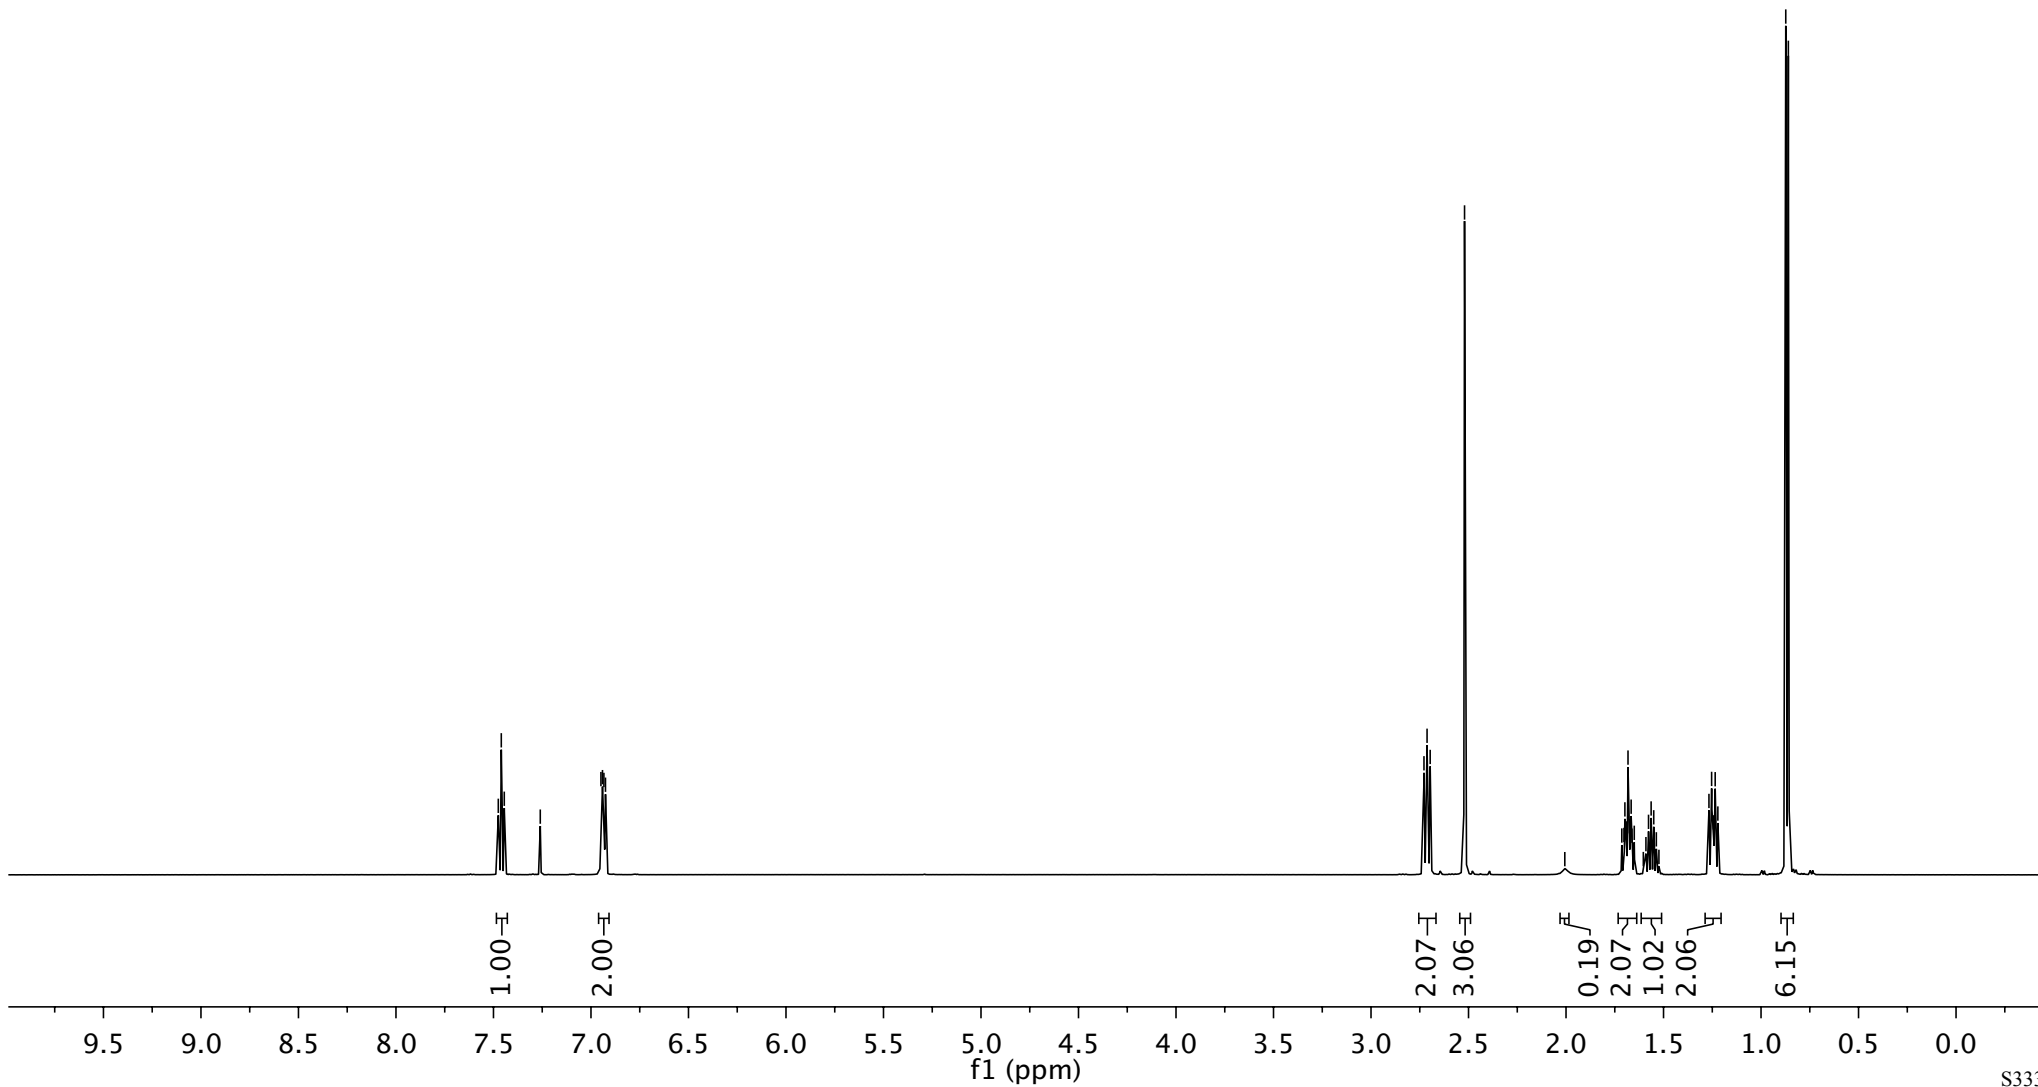

| Parameter              | Value   |
|------------------------|---------|
| Origin                 | Varian  |
| Spectrometer           | inova   |
| Solvent                | CDCl3   |
| Temperature            | 20.0    |
| Pulse Sequence         | s2pul   |
| Experiment             | 1D      |
| Probe                  | QUAD    |
| Receiver Gain          | 60      |
| Relaxation Delay       | 1.0000  |
| Pulse Width            | 0.0000  |
| Acquisition Time       | 1.0863  |
| Spectrometer Frequency | 125.66  |
| Spectral Width         | 30165.9 |
| Lowest Frequency       | -1274.8 |
| Nucleus                | 13C     |
| Acquired Size          | 32768   |
| Spectral Size          | 65536   |

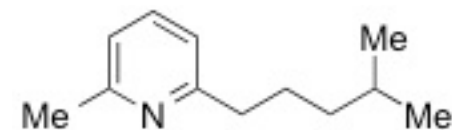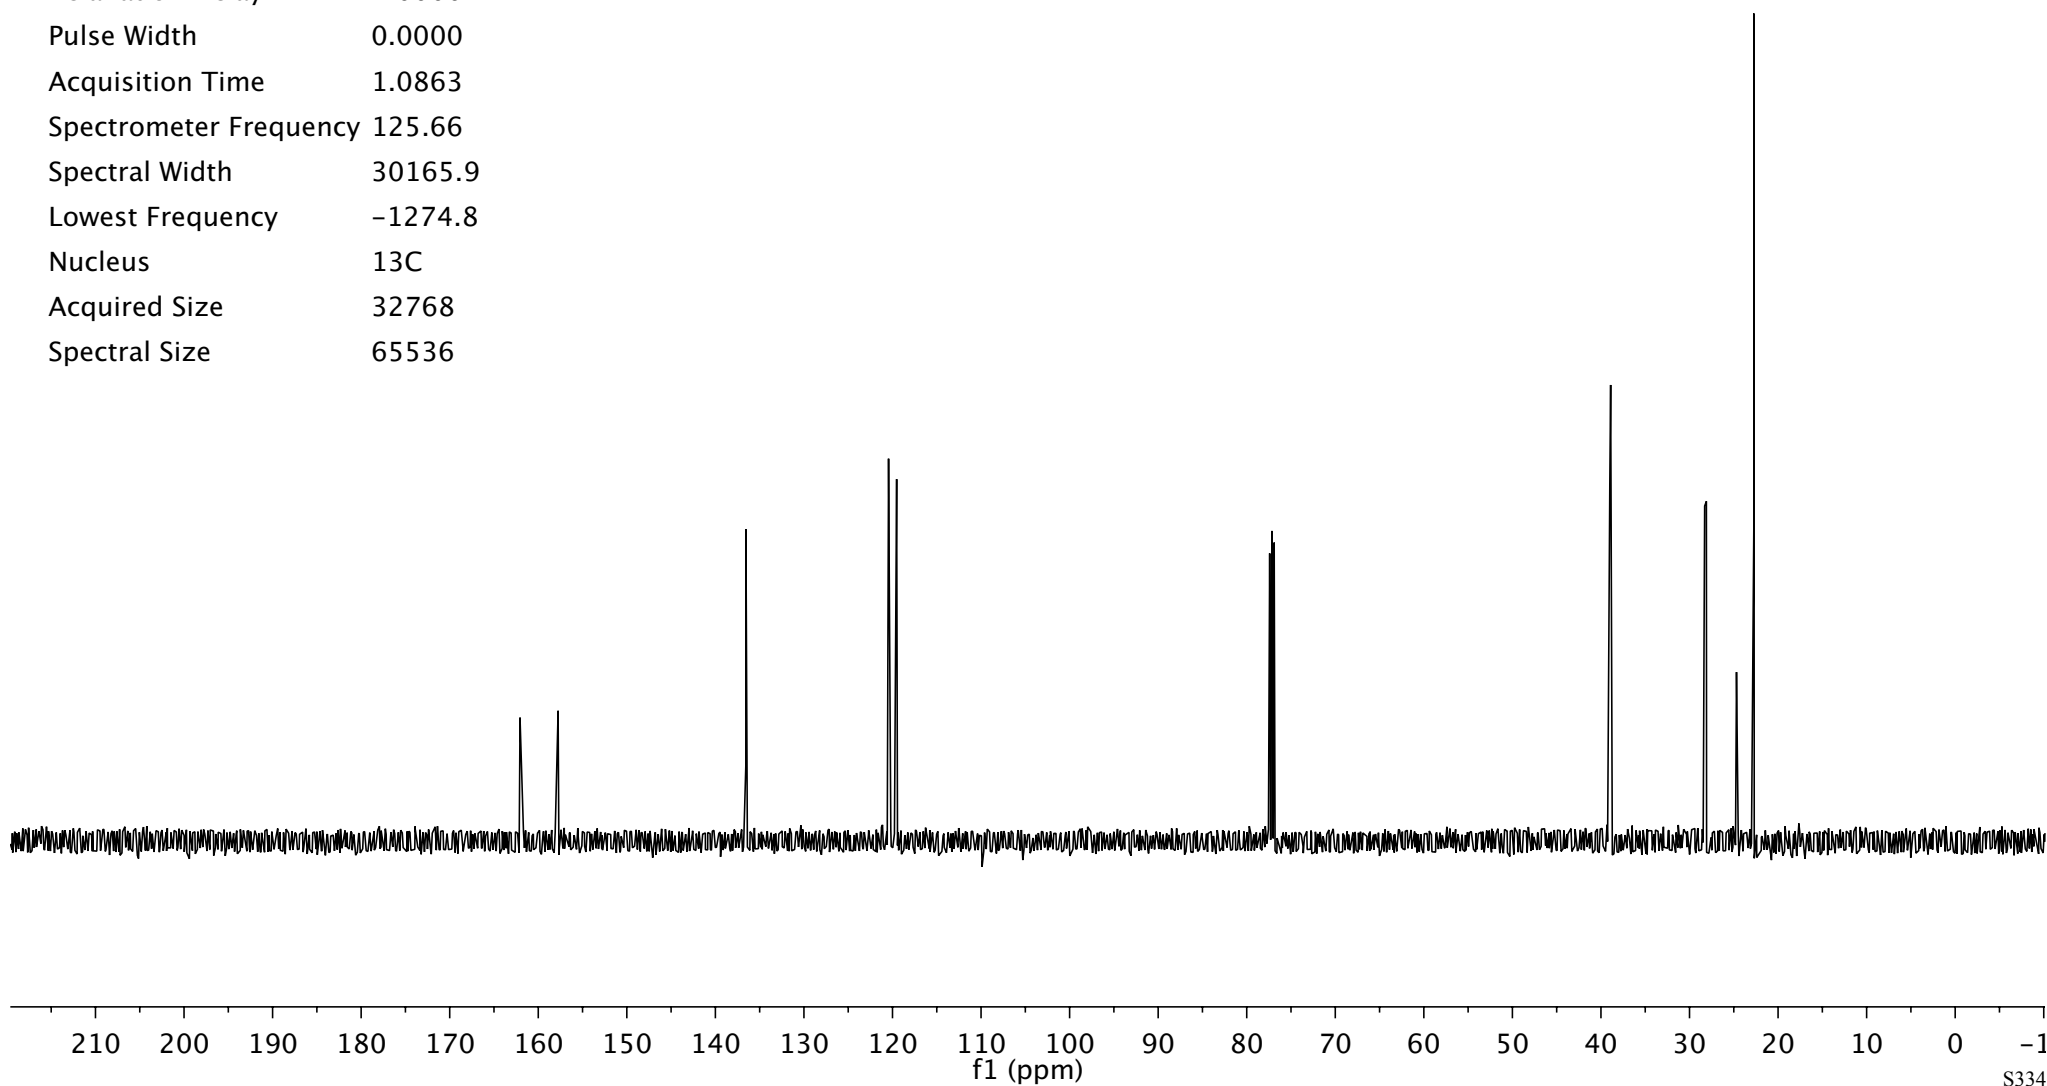

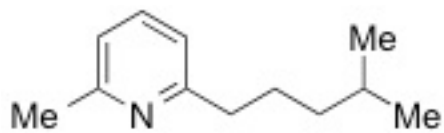

—162.07  
—157.77

—136.56

—120.45  
—119.54

77.41 CDCl<sub>3</sub>  
77.16 CDCl<sub>3</sub>  
76.91 CDCl<sub>3</sub>

39.01  
38.92

28.30  
28.10

24.70  
22.74

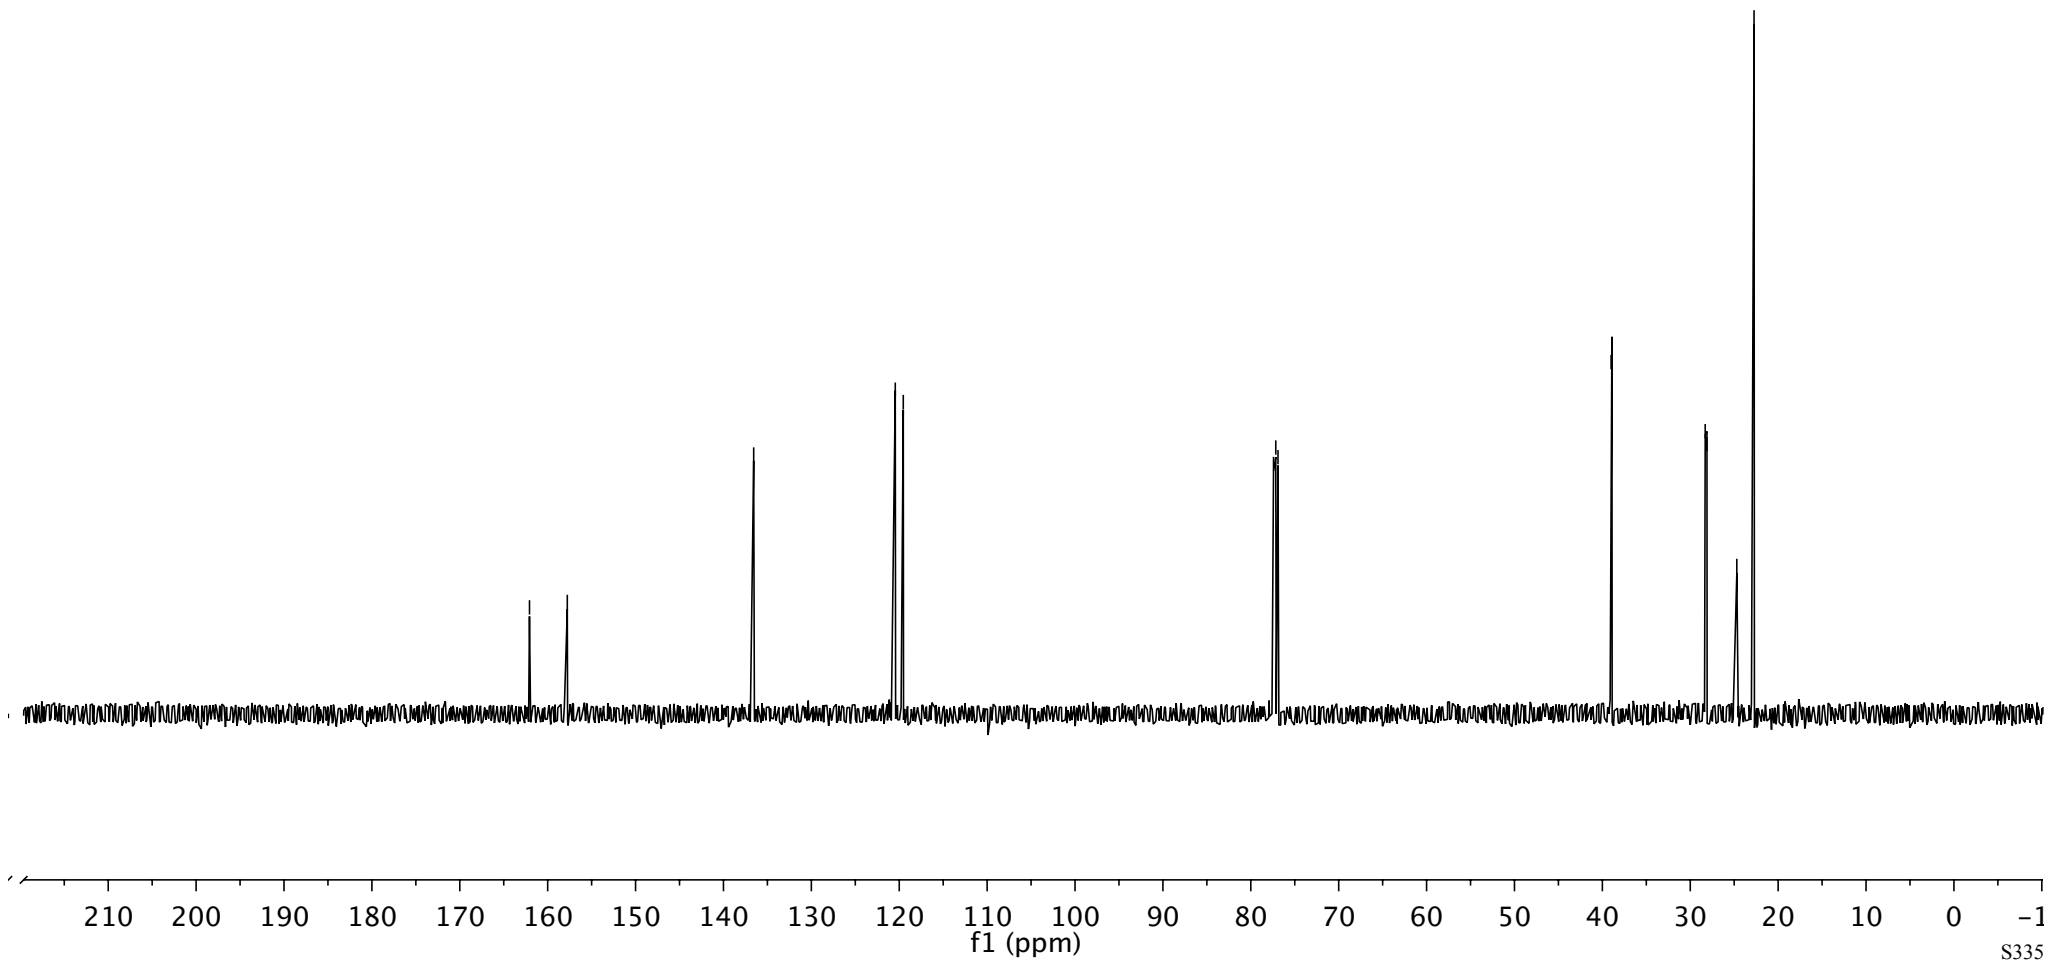



| Parameter              | Value          |
|------------------------|----------------|
| Origin                 | Varian         |
| Spectrometer           | inova          |
| Solvent                | CDCl3          |
| Temperature            | 20.0           |
| Pulse Sequence         | s2pul          |
| Experiment             | 1D             |
| Probe                  | QUAD           |
| Receiver Gain          | 46             |
| Relaxation Delay       | 5.0000         |
| Pulse Width            | 0.0000         |
| Acquisition Time       | 4.6645         |
| Spectrometer Frequency | 499.69         |
| Spectral Width         | 7024.9         |
| Lowest Frequency       | -1021.6        |
| Nucleus                | <sup>1</sup> H |
| Acquired Size          | 32768          |
| Spectral Size          | 65536          |

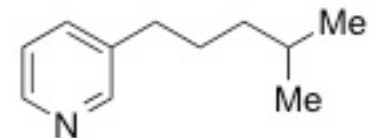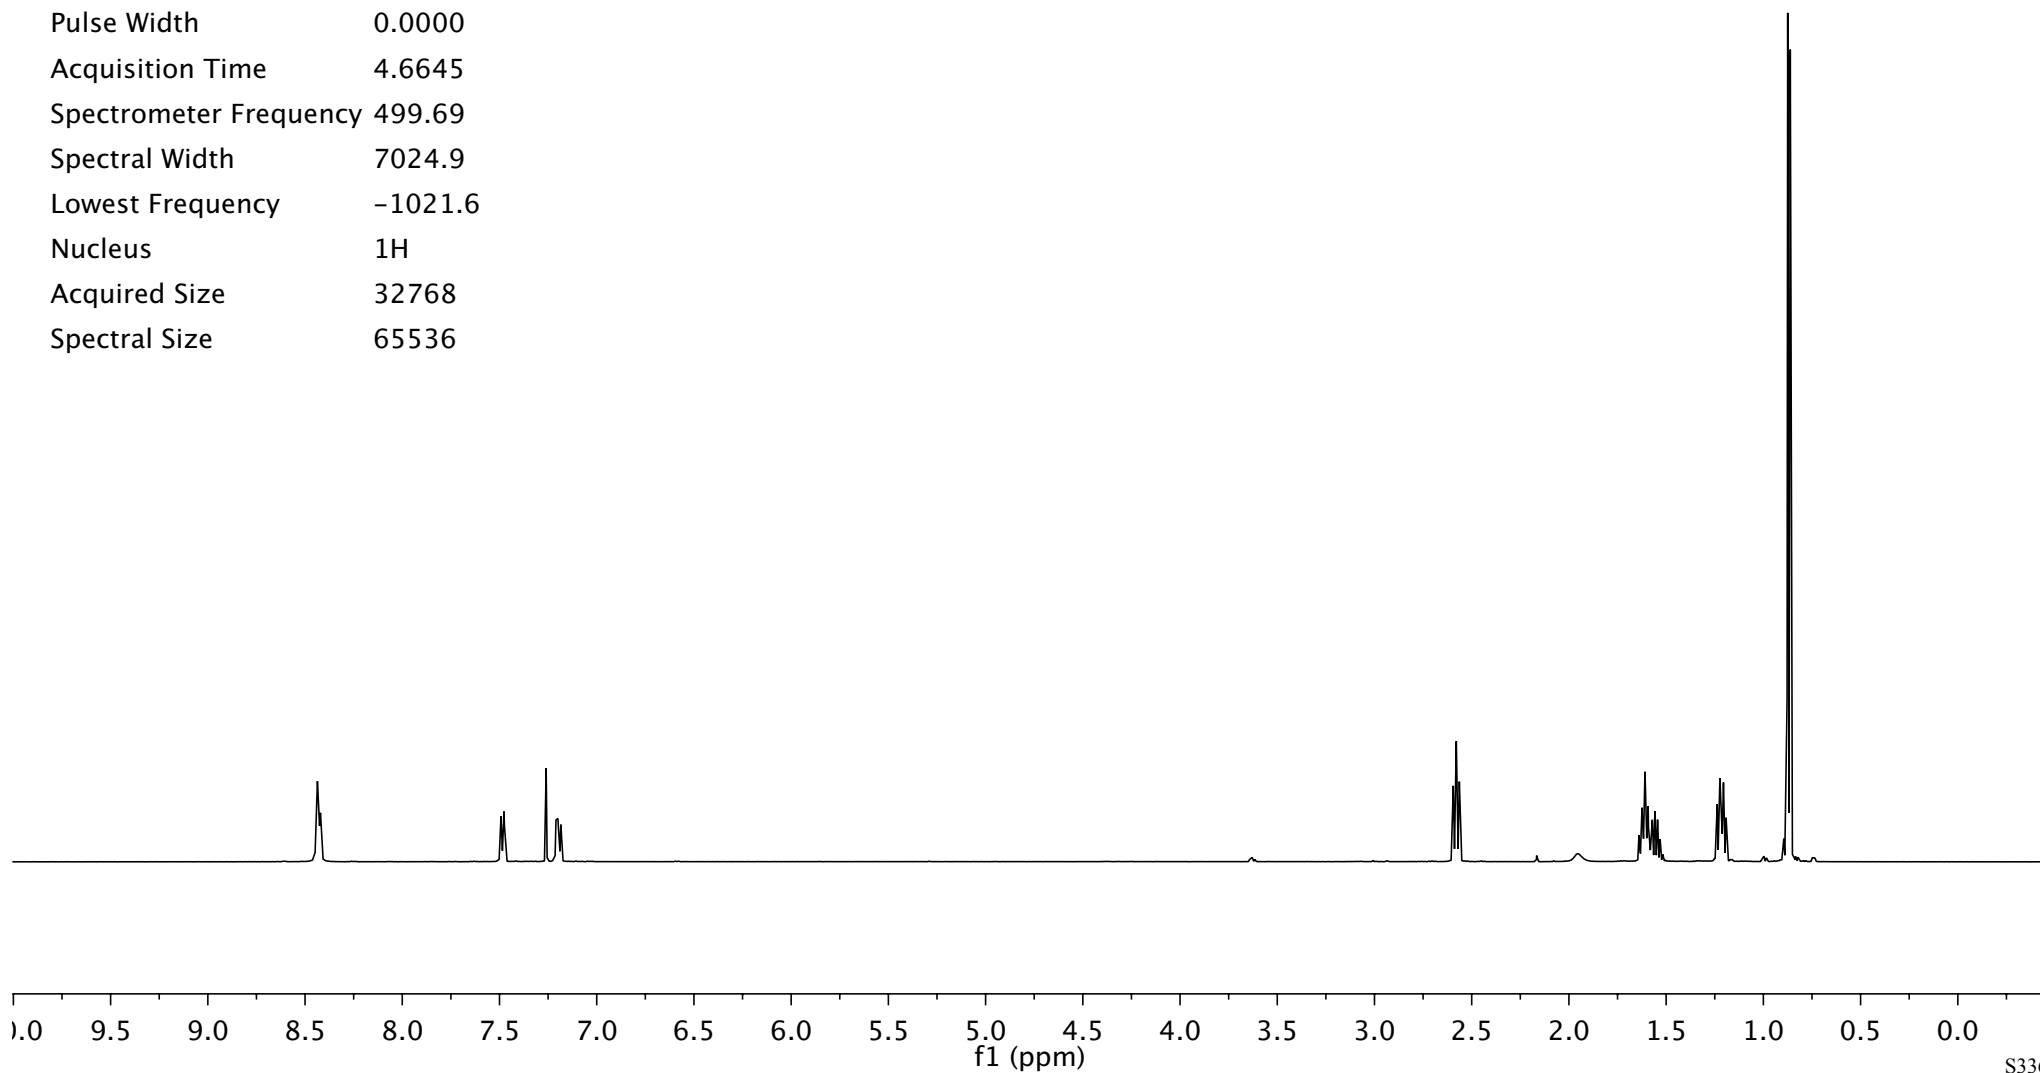

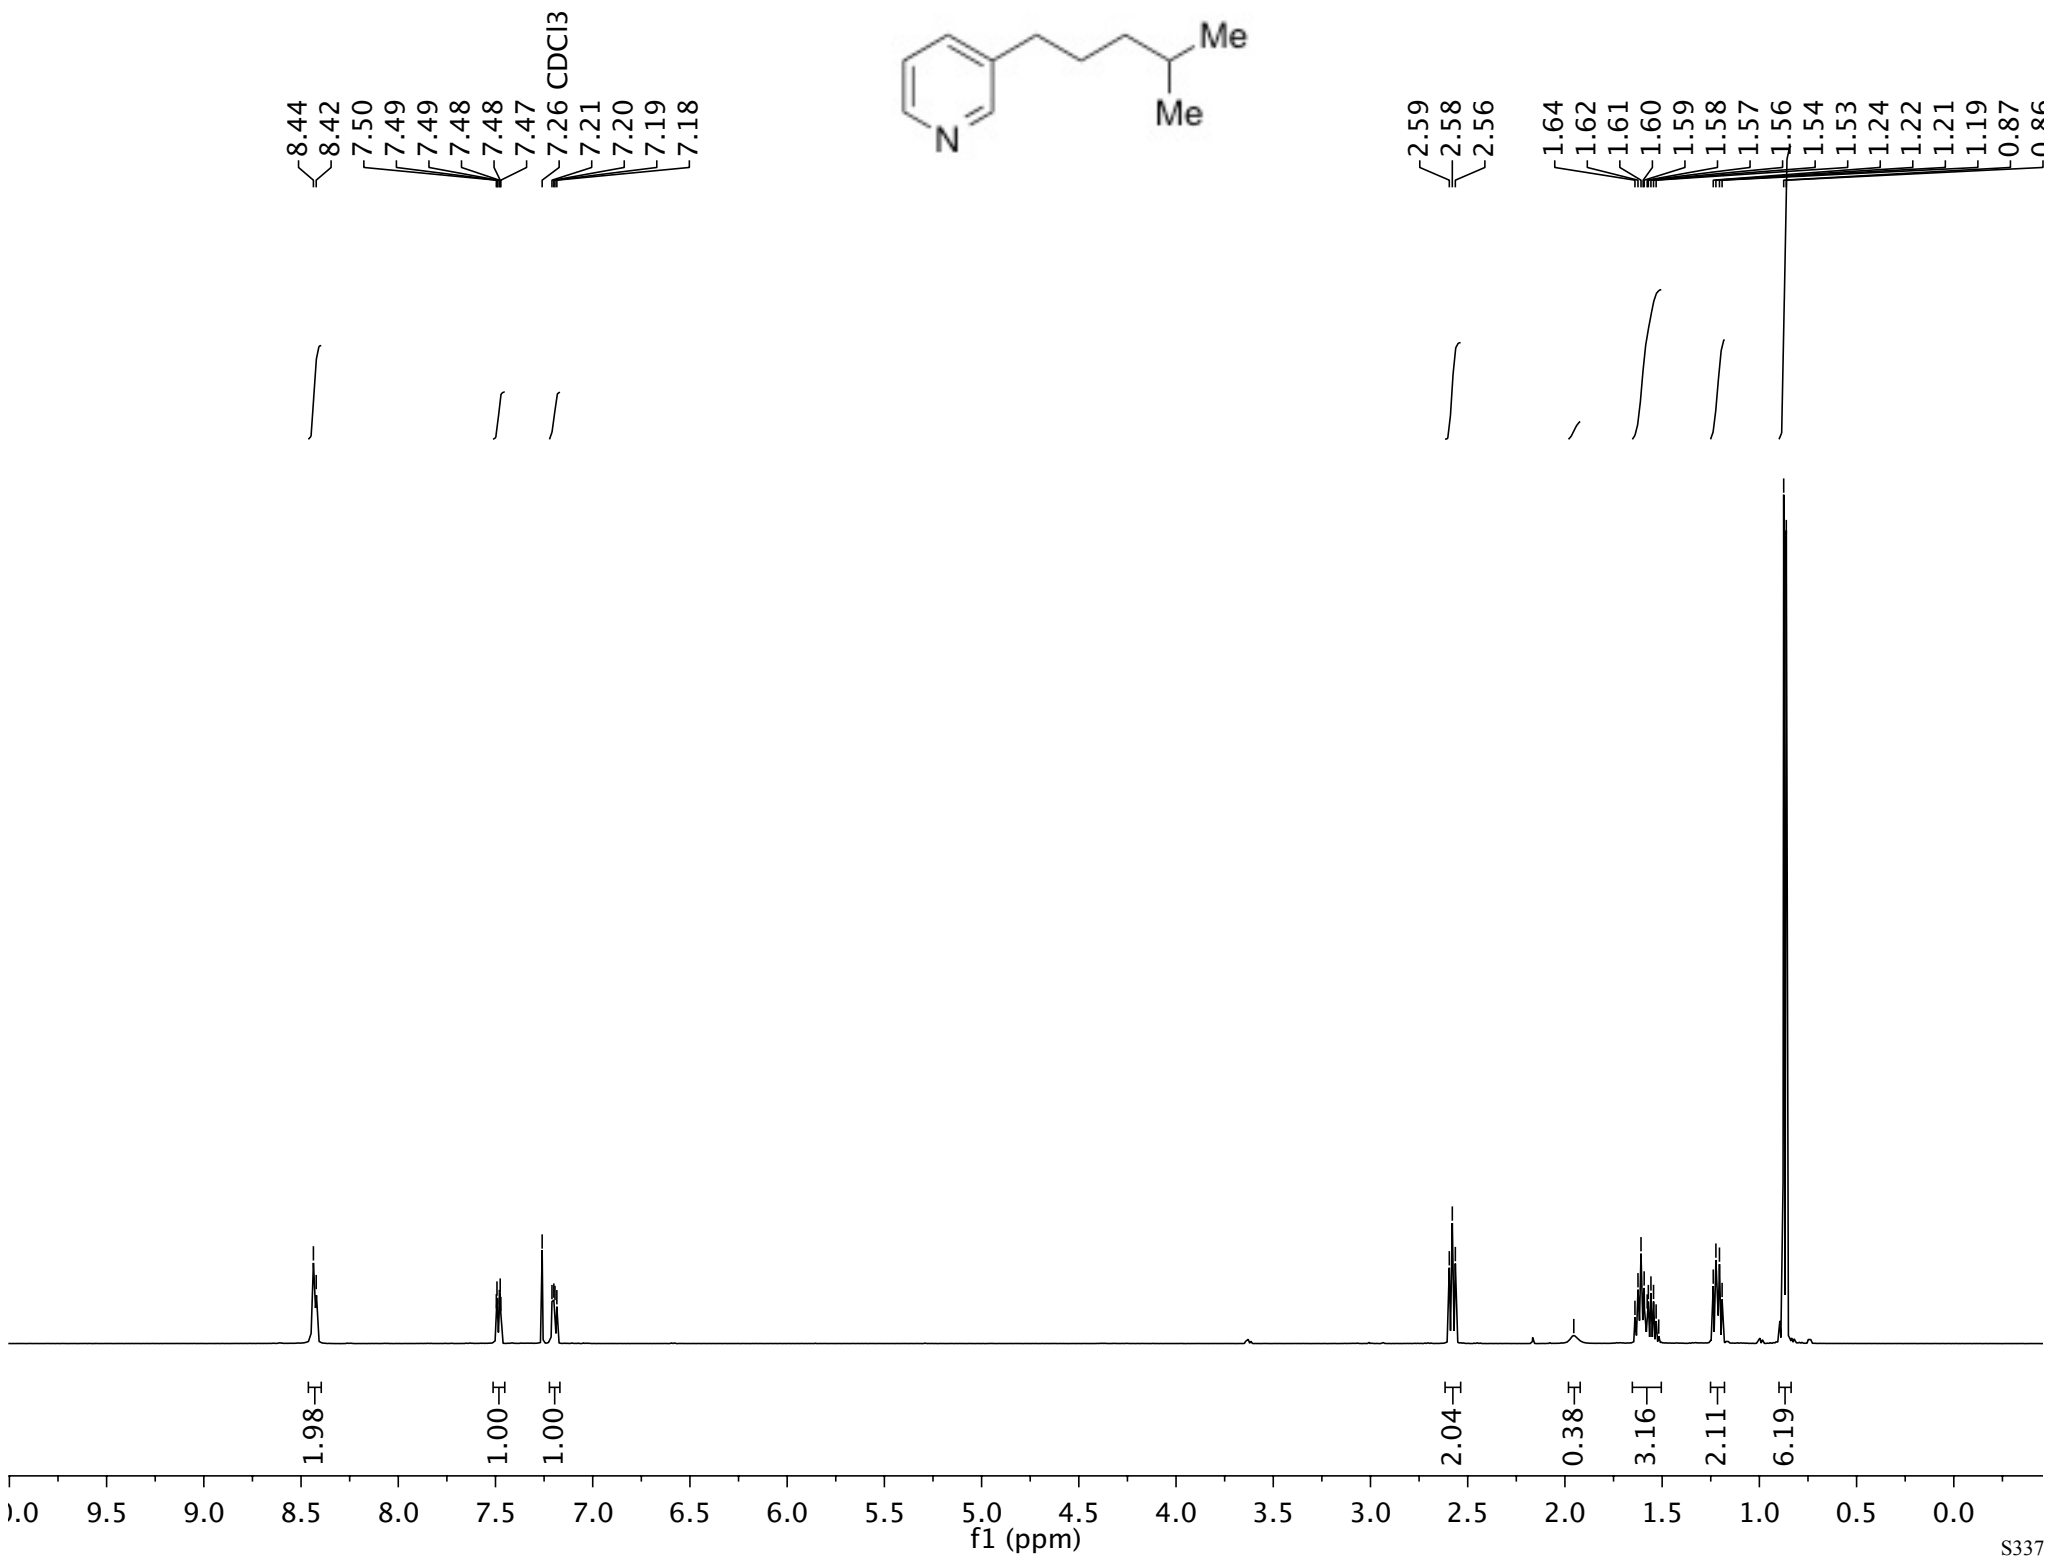

| Parameter              | Value           |
|------------------------|-----------------|
| Origin                 | Varian          |
| Spectrometer           | inova           |
| Solvent                | CDCl3           |
| Temperature            | 20.0            |
| Pulse Sequence         | s2pul           |
| Experiment             | 1D              |
| Probe                  | QUAD            |
| Receiver Gain          | 60              |
| Relaxation Delay       | 1.0000          |
| Pulse Width            | 0.0000          |
| Acquisition Time       | 1.0863          |
| Spectrometer Frequency | 125.66          |
| Spectral Width         | 30165.9         |
| Lowest Frequency       | -1273.3         |
| Nucleus                | <sup>13</sup> C |
| Acquired Size          | 32768           |
| Spectral Size          | 65536           |

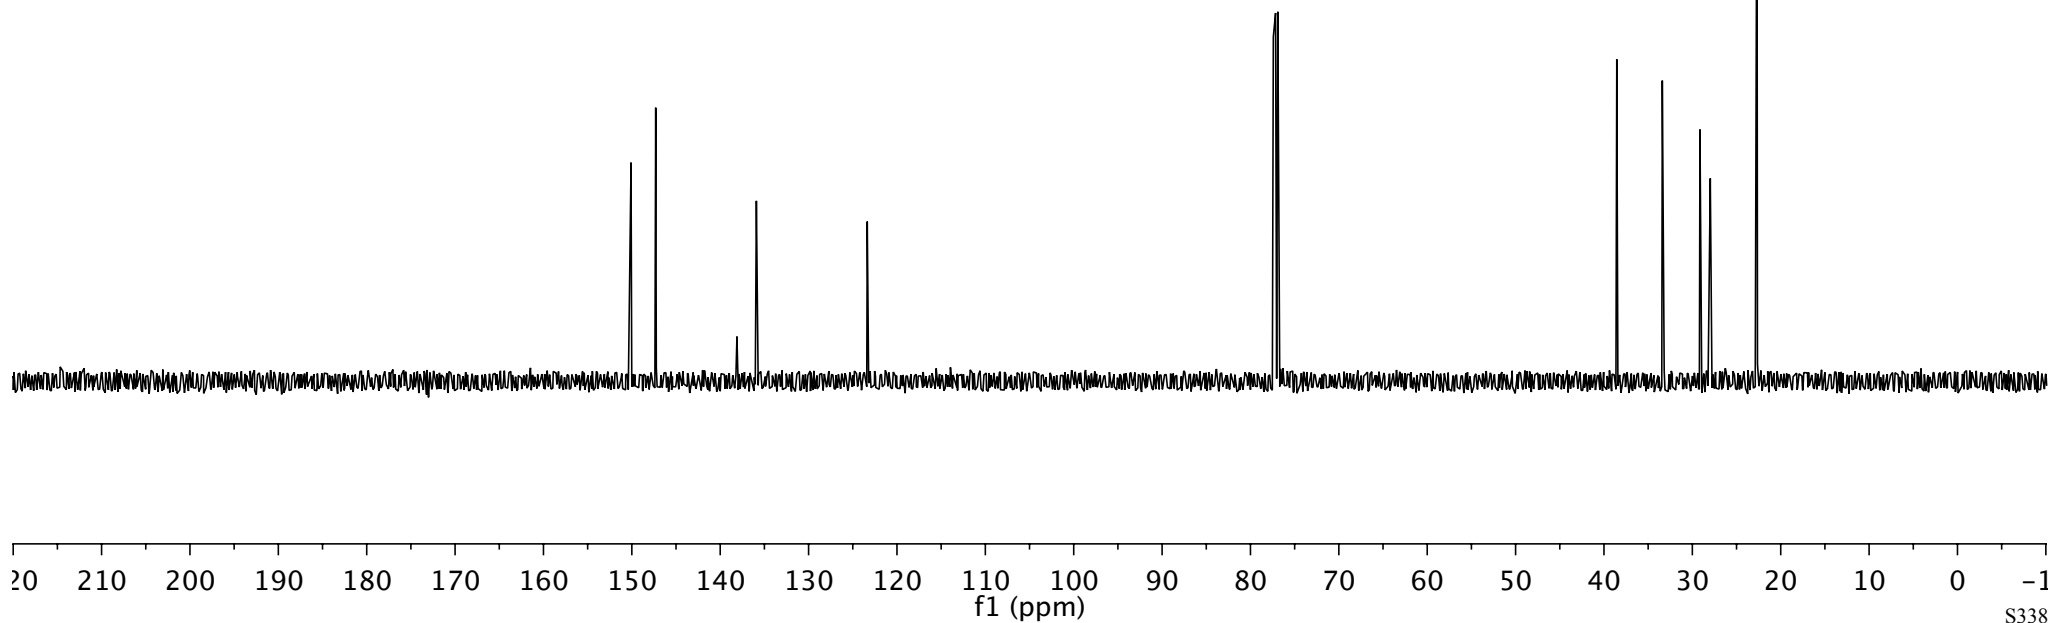

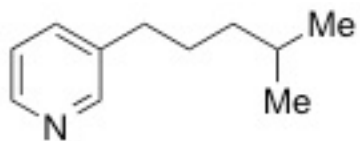

~150.09  
 ~147.30  
 ~138.11  
 ~135.91  
 —123.36  
 77.41 CDCl<sub>3</sub>  
 77.16 CDCl<sub>3</sub>  
 76.90 CDCl<sub>3</sub>  
 ~38.55  
 ~33.40  
 ~29.14  
 ~27.97  
 ~22.69

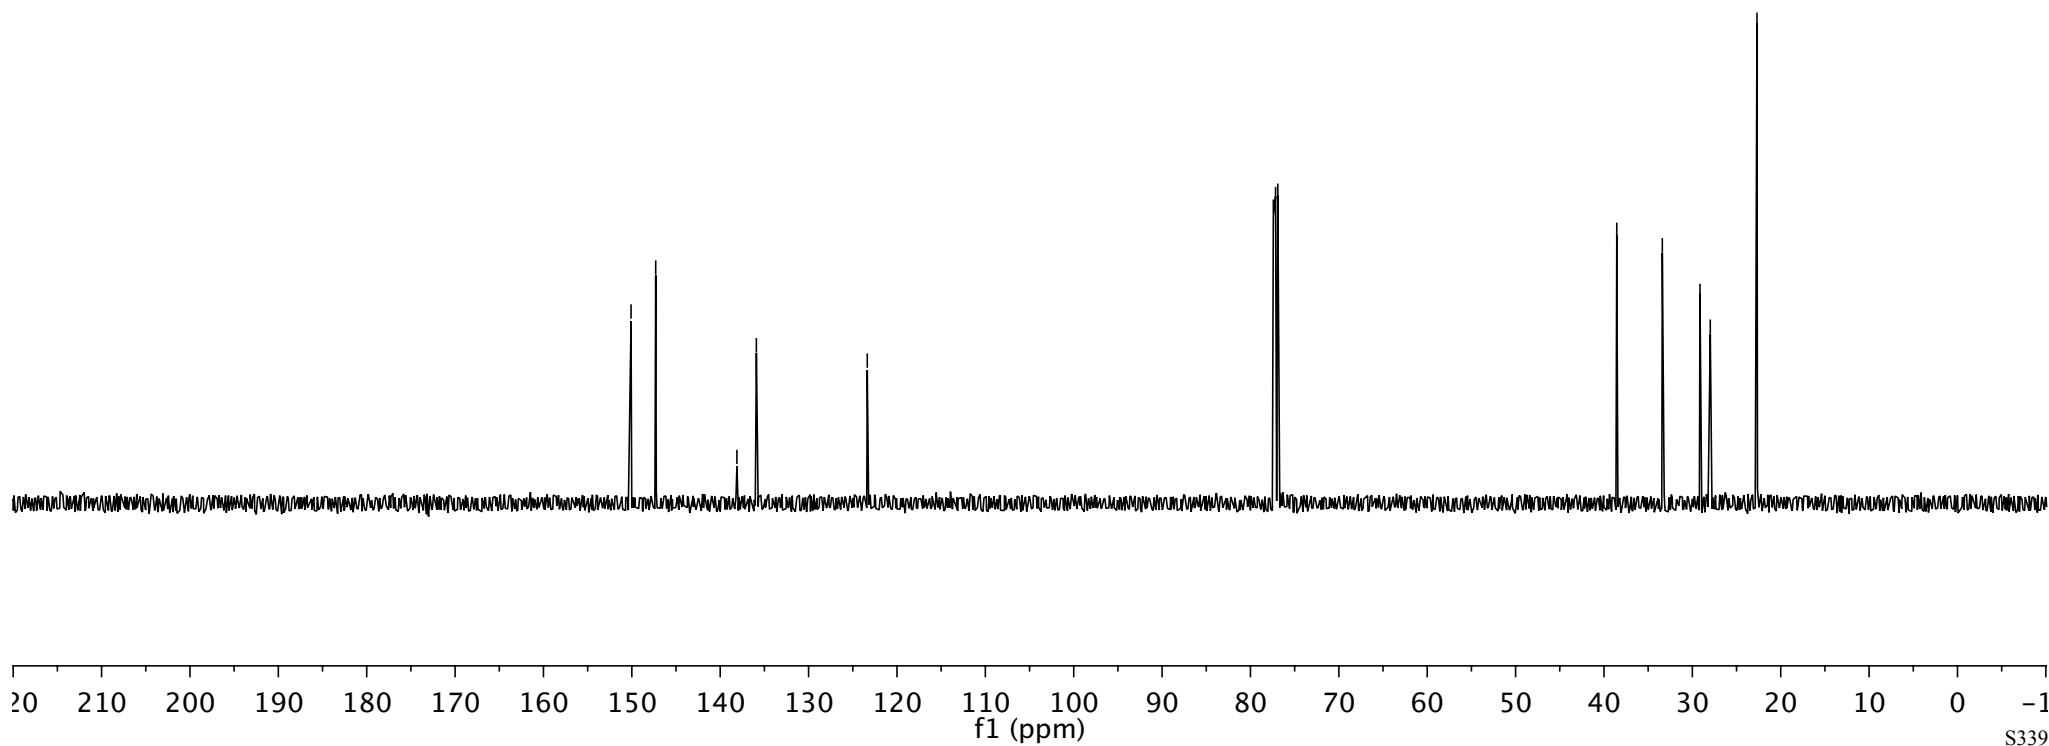

| Parameter              | Value   |
|------------------------|---------|
| Origin                 | Varian  |
| Spectrometer           | inova   |
| Solvent                | CDCl3   |
| Temperature            | 20.0    |
| Pulse Sequence         | s2pul   |
| Experiment             | 1D      |
| Probe                  | quad94  |
| Receiver Gain          | 40      |
| Relaxation Delay       | 5.0000  |
| Pulse Width            | 0.0000  |
| Acquisition Time       | 4.0960  |
| Spectrometer Frequency | 399.95  |
| Spectral Width         | 8000.0  |
| Lowest Frequency       | -2424.8 |
| Nucleus                | 1H      |
| Acquired Size          | 32768   |
| Spectral Size          | 65536   |

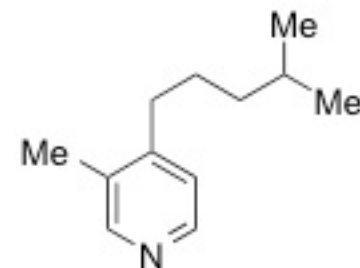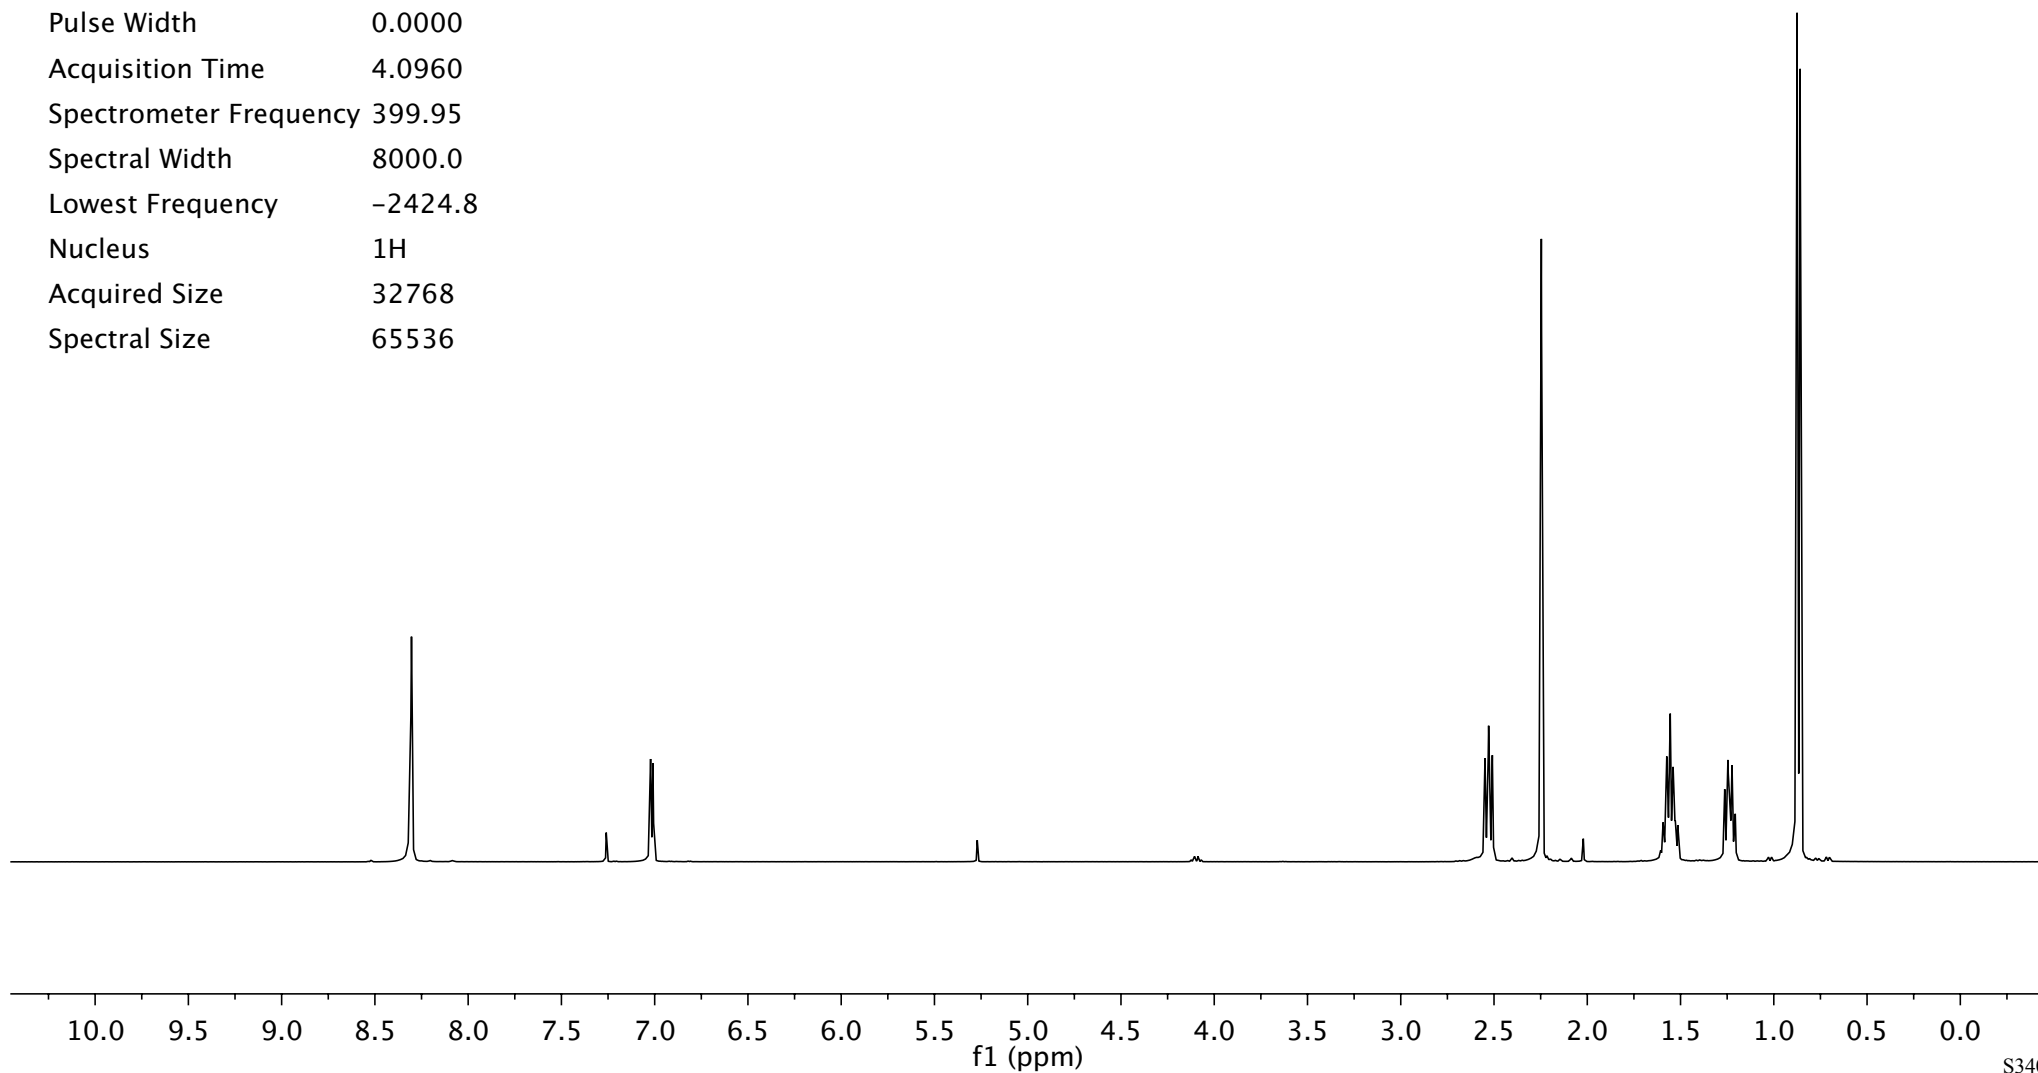

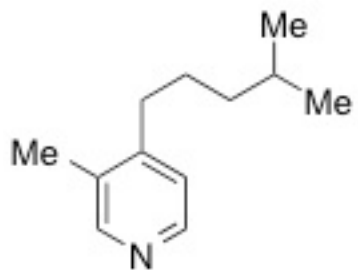

8.31  
8.30

7.26 CDCl<sub>3</sub>  
7.02  
7.01

5.27

2.55  
2.53  
2.51  
2.25  
2.02  
1.61  
1.59  
1.59  
1.58  
1.57  
1.57  
1.56  
1.56  
1.55  
1.54  
1.53  
1.52  
1.51  
1.26  
1.25  
1.24  
1.22  
1.21  
0.88  
0.86

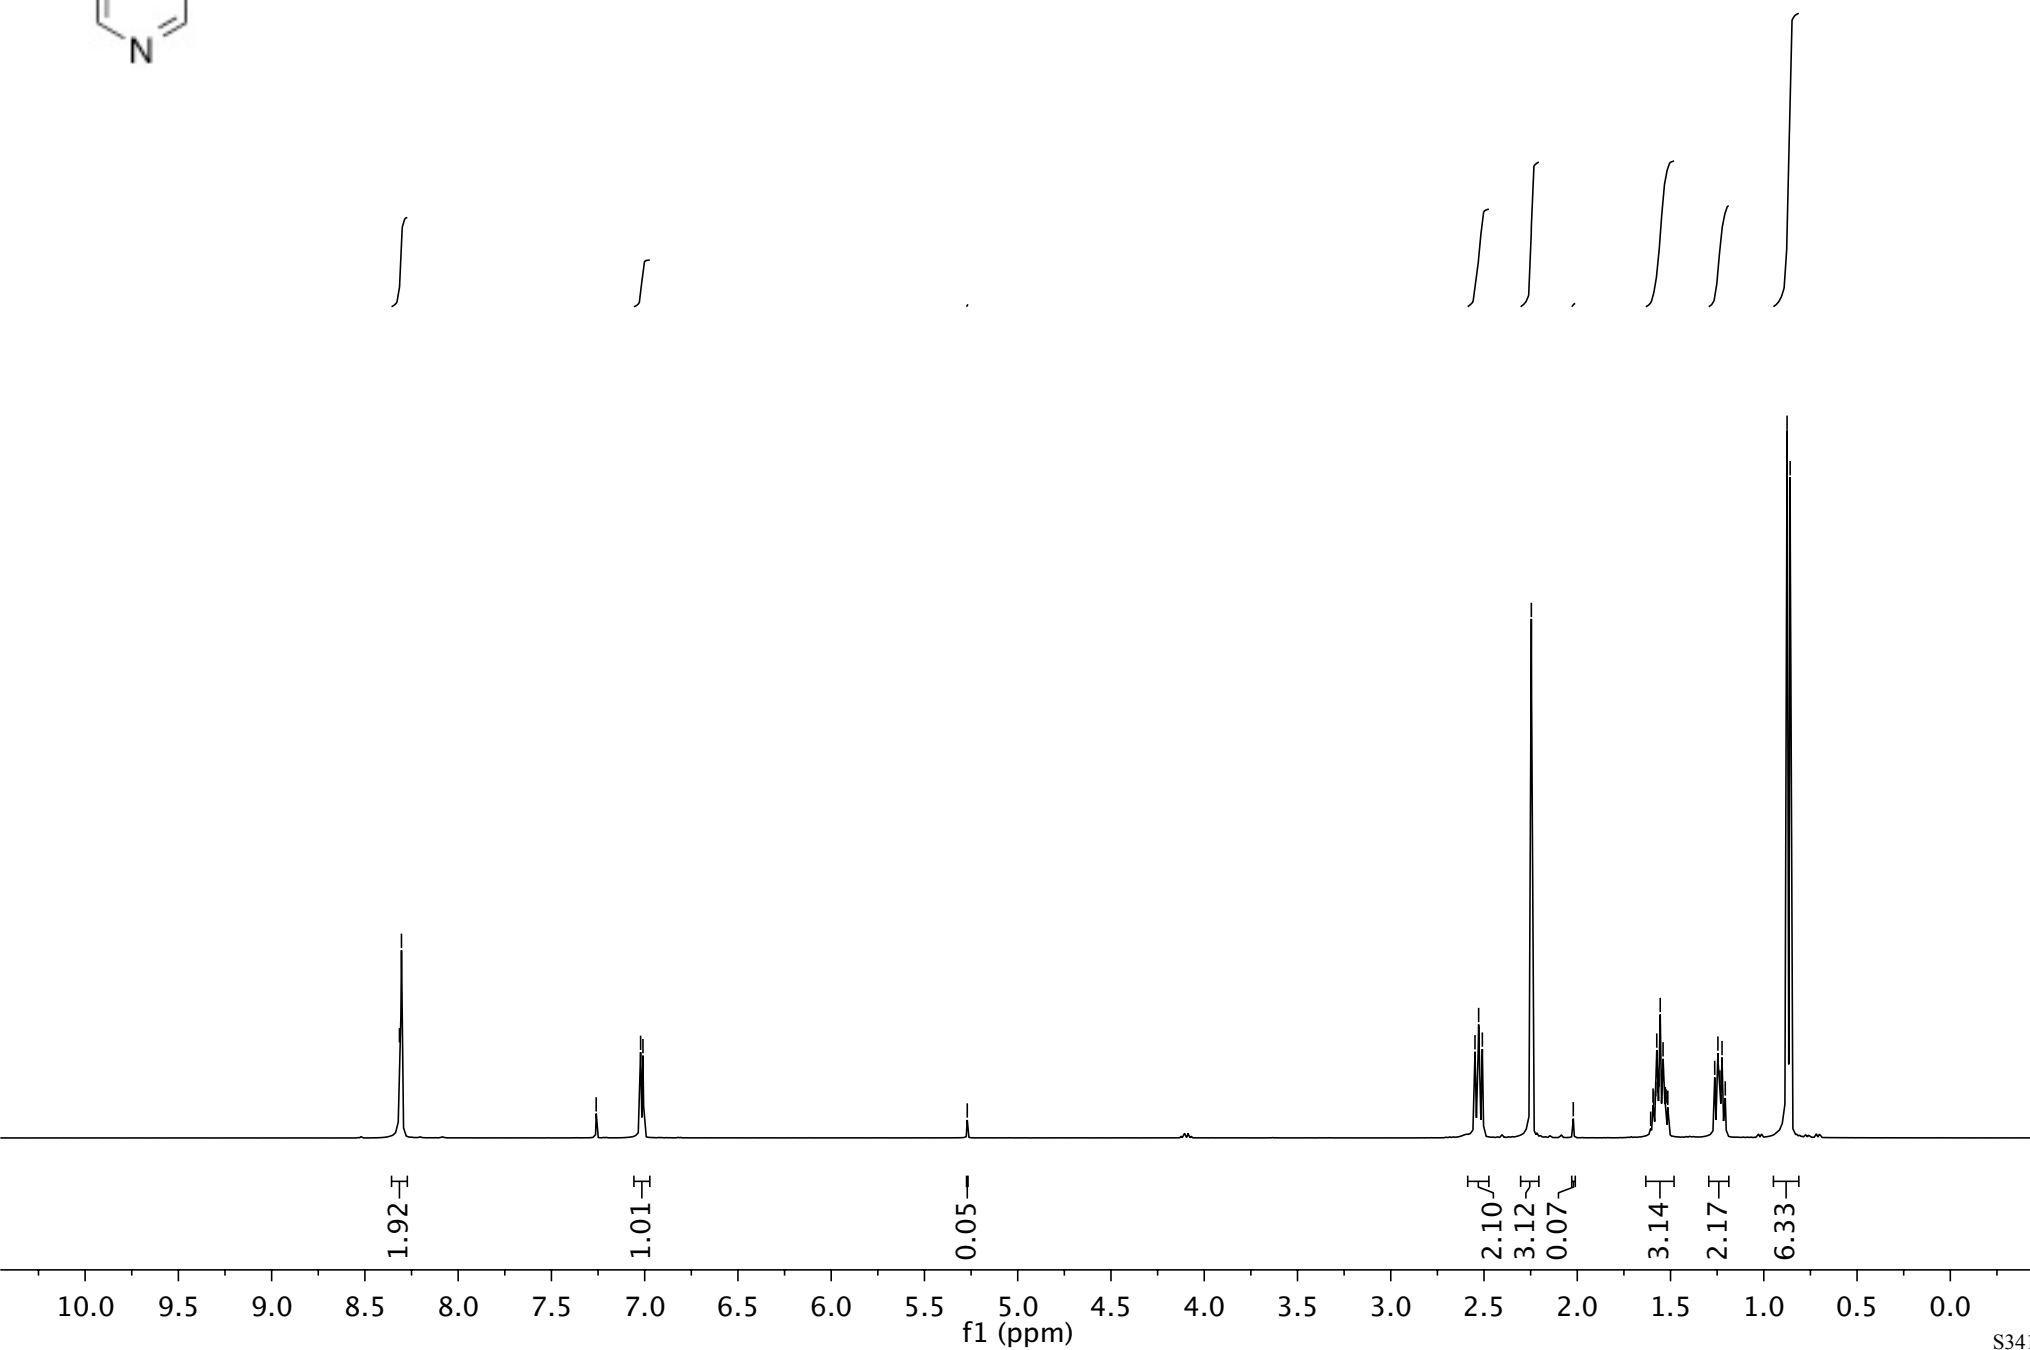

| Parameter              | Value           |
|------------------------|-----------------|
| Origin                 | Varian          |
| Spectrometer           | inova           |
| Solvent                | CDCl3           |
| Temperature            | 20.0            |
| Pulse Sequence         | s2pul           |
| Experiment             | 1D              |
| Probe                  | quad94          |
| Receiver Gain          | 60              |
| Relaxation Delay       | 2.0000          |
| Pulse Width            | 0.0000          |
| Acquisition Time       | 1.3107          |
| Spectrometer Frequency | 100.58          |
| Spectral Width         | 25000.0         |
| Lowest Frequency       | -1029.5         |
| Nucleus                | <sup>13</sup> C |
| Acquired Size          | 32768           |
| Spectral Size          | 65536           |

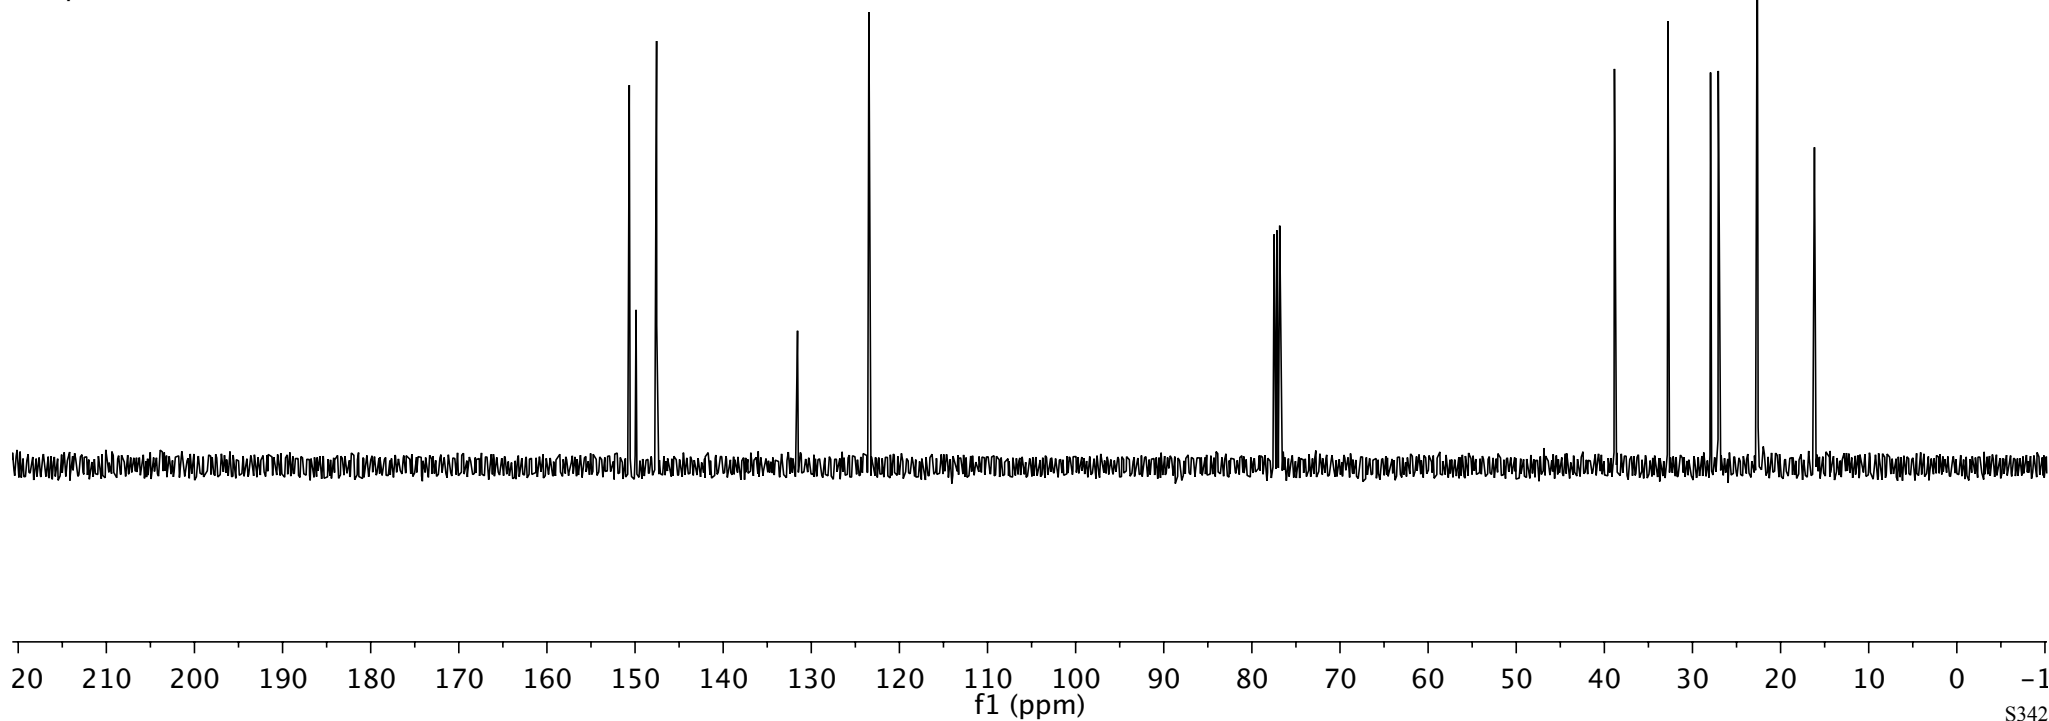

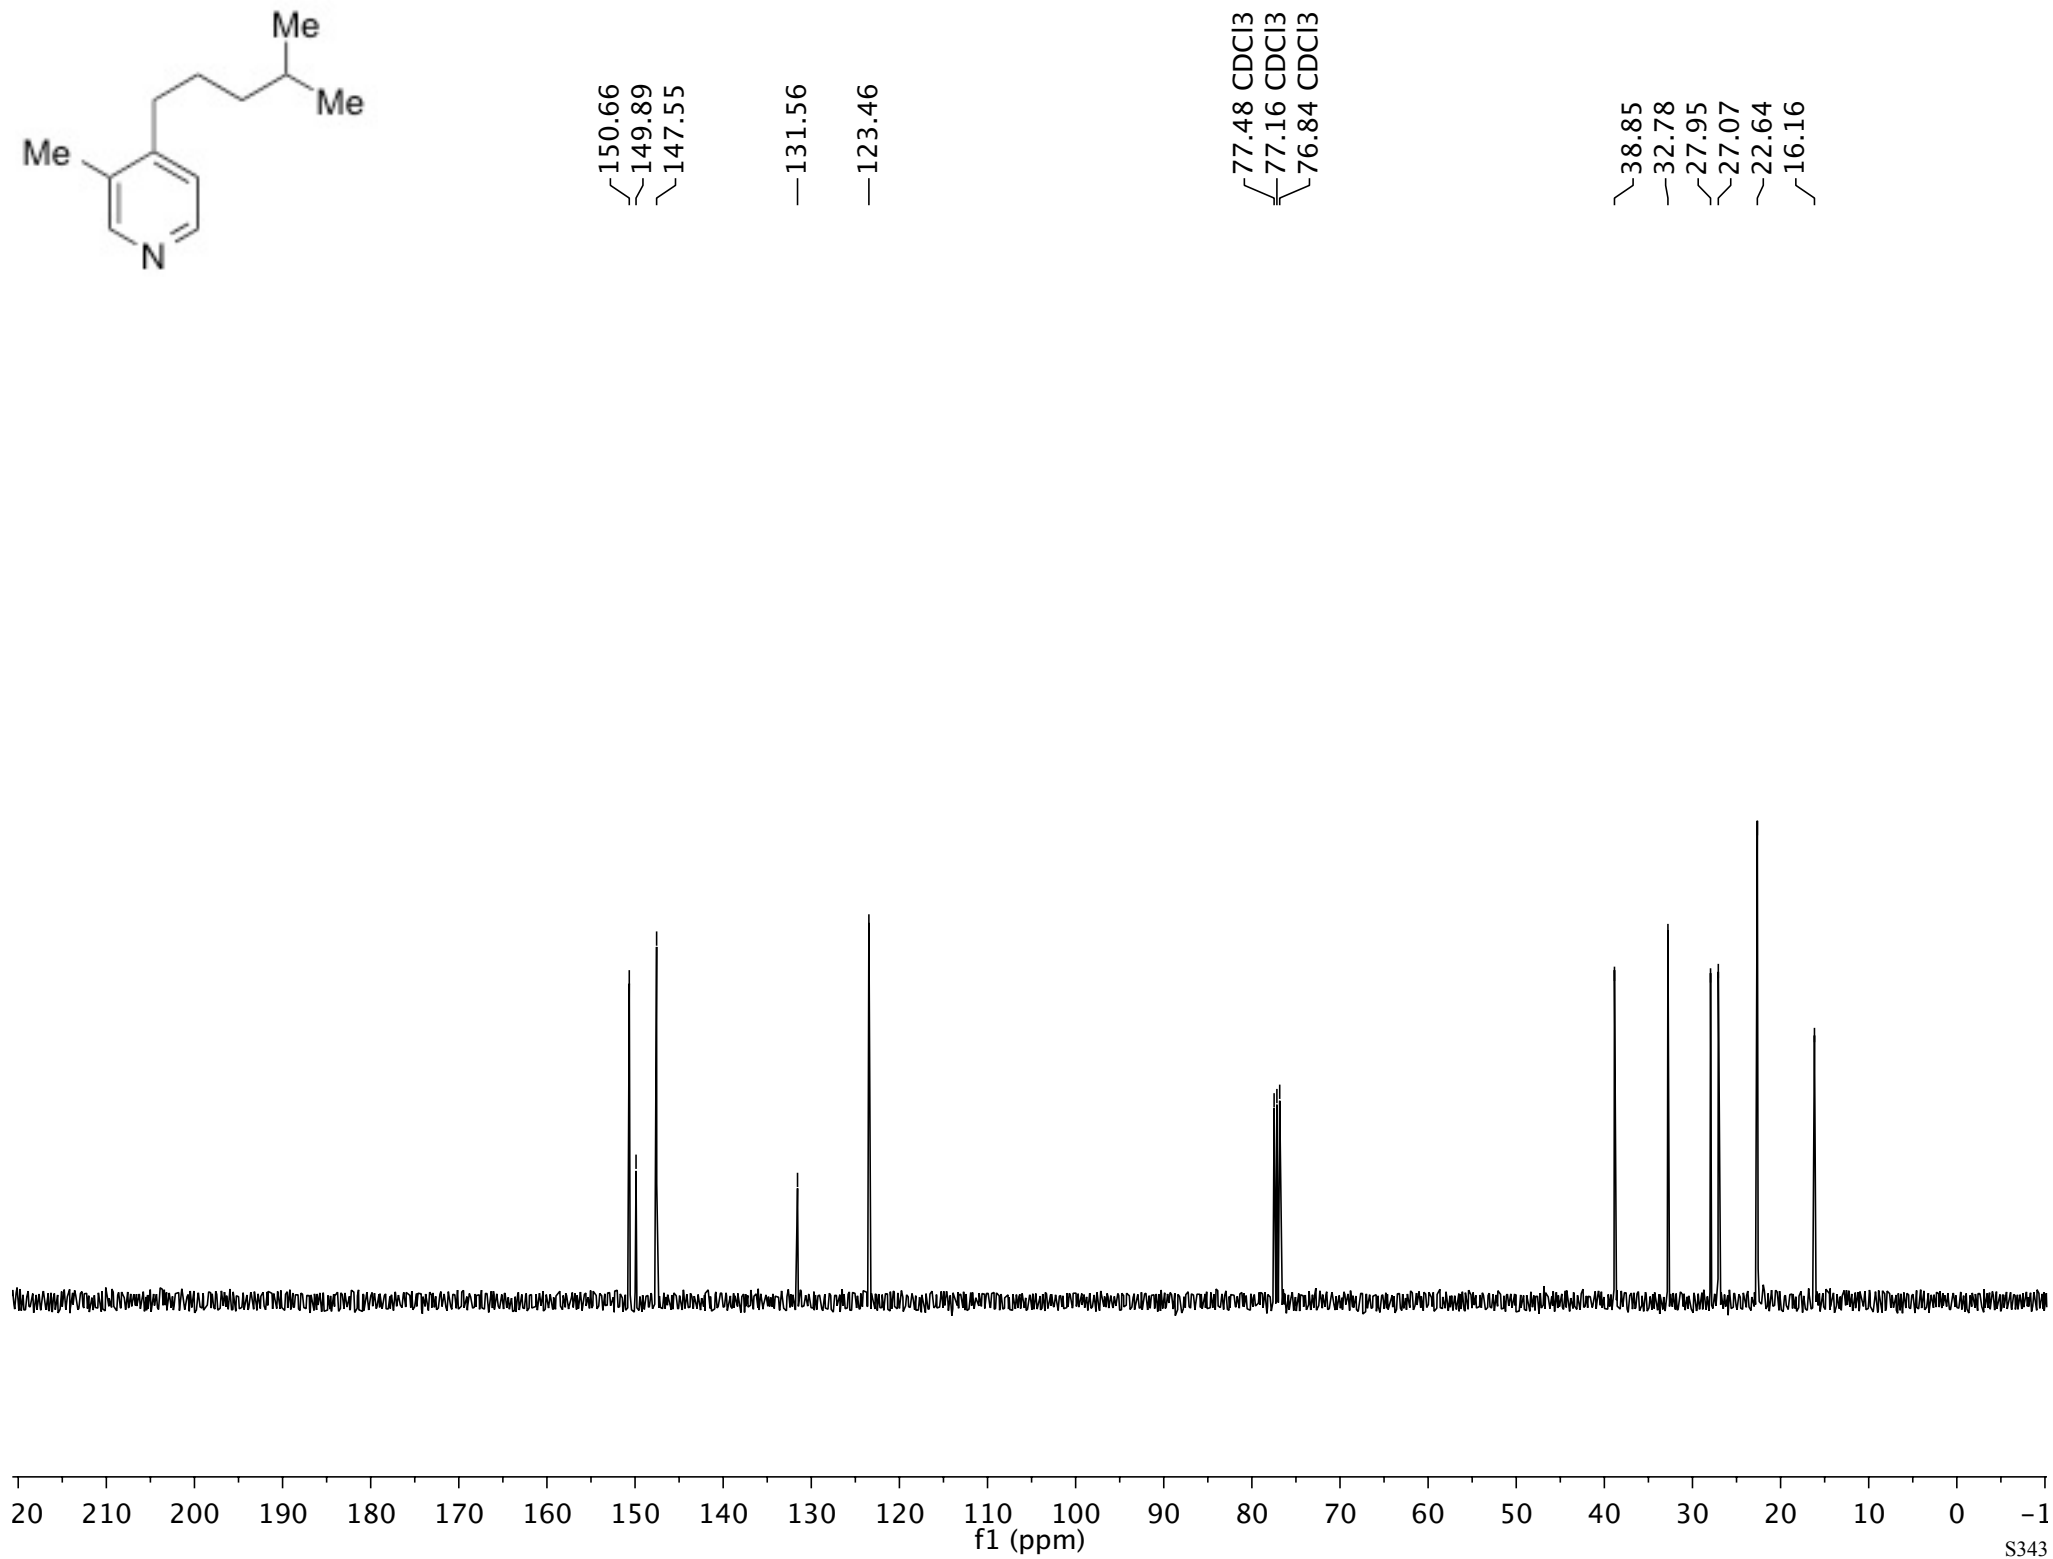



| Parameter              | Value   |
|------------------------|---------|
| Origin                 | Varian  |
| Spectrometer           | inova   |
| Solvent                | CDCl3   |
| Temperature            | 20.0    |
| Pulse Sequence         | s2pul   |
| Experiment             | 1D      |
| Probe                  | hcn     |
| Receiver Gain          | 26      |
| Relaxation Delay       | 10.0000 |
| Pulse Width            | 0.0000  |
| Acquisition Time       | 4.0960  |
| Spectrometer Frequency | 500.07  |
| Spectral Width         | 8000.0  |
| Lowest Frequency       | -1521.1 |
| Nucleus                | 1H      |
| Acquired Size          | 32768   |
| Spectral Size          | 65536   |

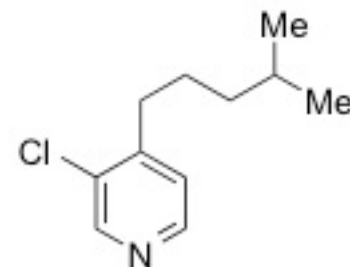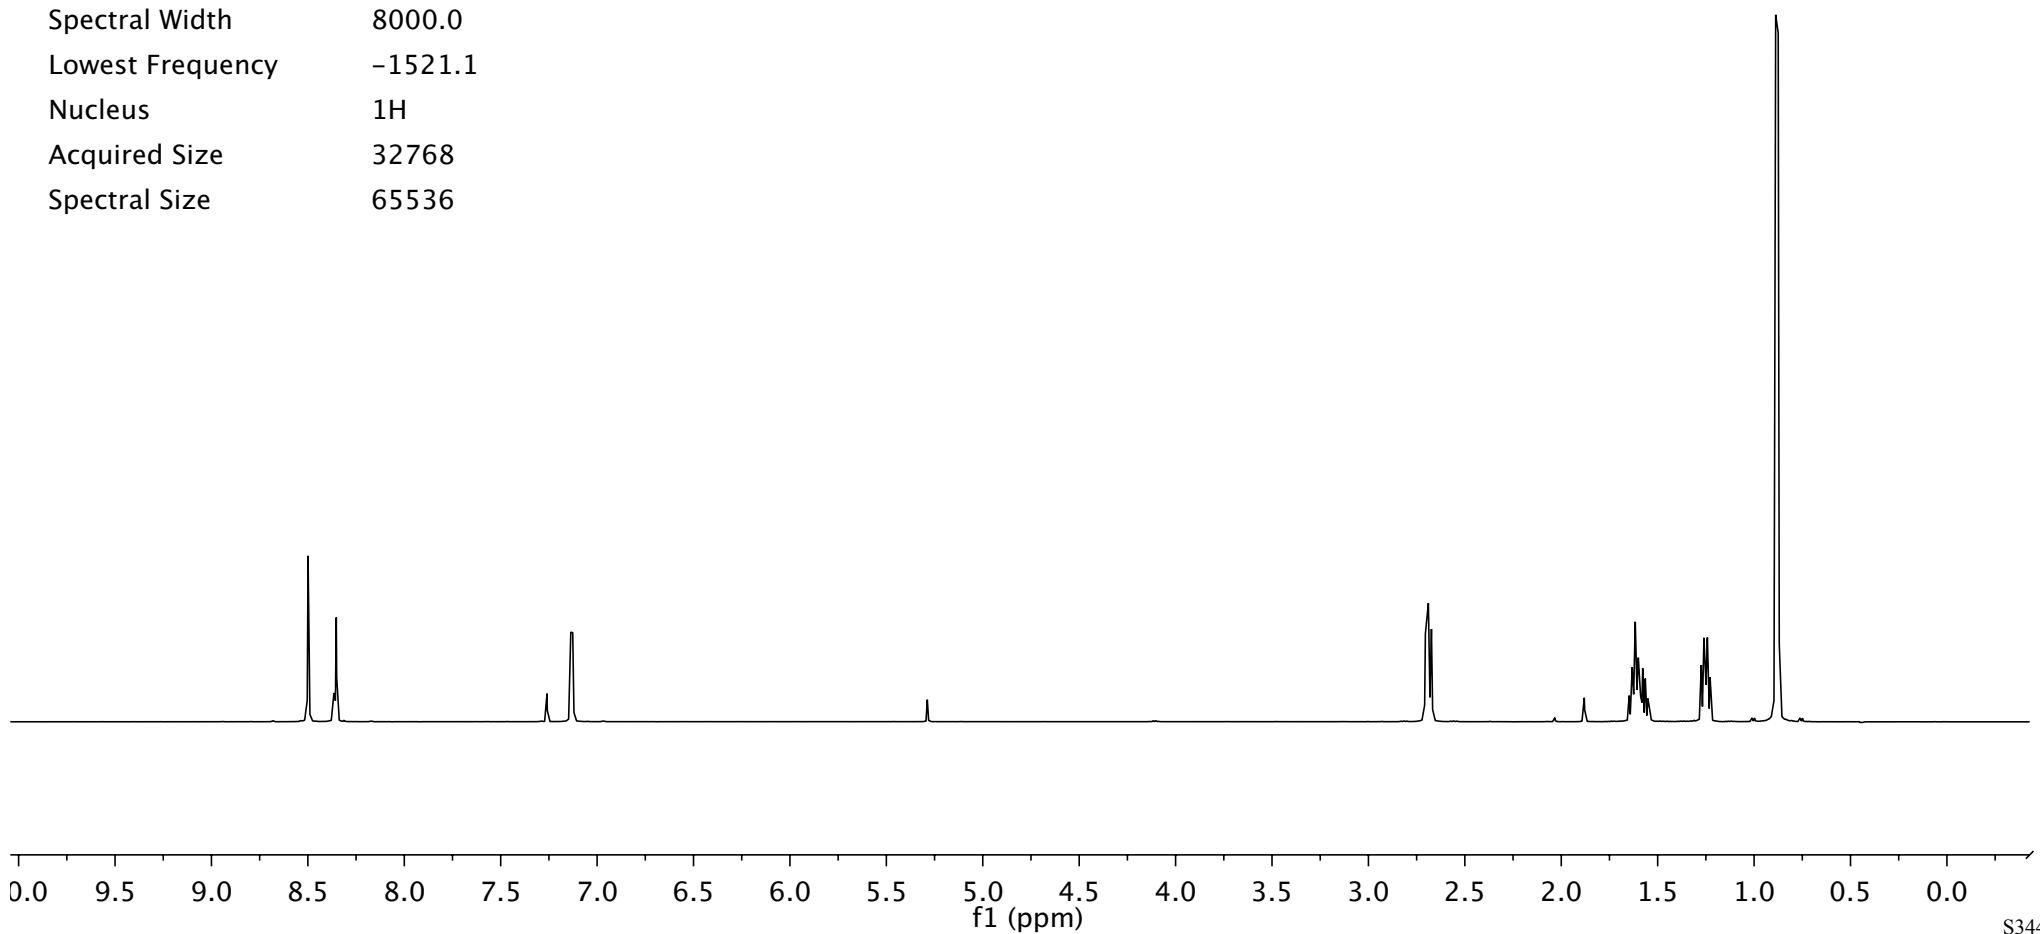

| Parameter              | Value           |
|------------------------|-----------------|
| Origin                 | Varian          |
| Spectrometer           | inova           |
| Solvent                | CDCl3           |
| Temperature            | 20.0            |
| Pulse Sequence         | s2pul           |
| Experiment             | 1D              |
| Probe                  | QUADG           |
| Receiver Gain          | 60              |
| Relaxation Delay       | 1.0000          |
| Pulse Width            | 0.0000          |
| Acquisition Time       | 1.0240          |
| Spectrometer Frequency | 125.60          |
| Spectral Width         | 32000.0         |
| Lowest Frequency       | -2202.7         |
| Nucleus                | <sup>13</sup> C |
| Acquired Size          | 32768           |
| Spectral Size          | 65536           |

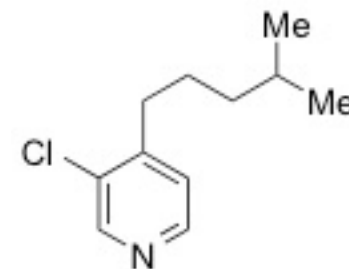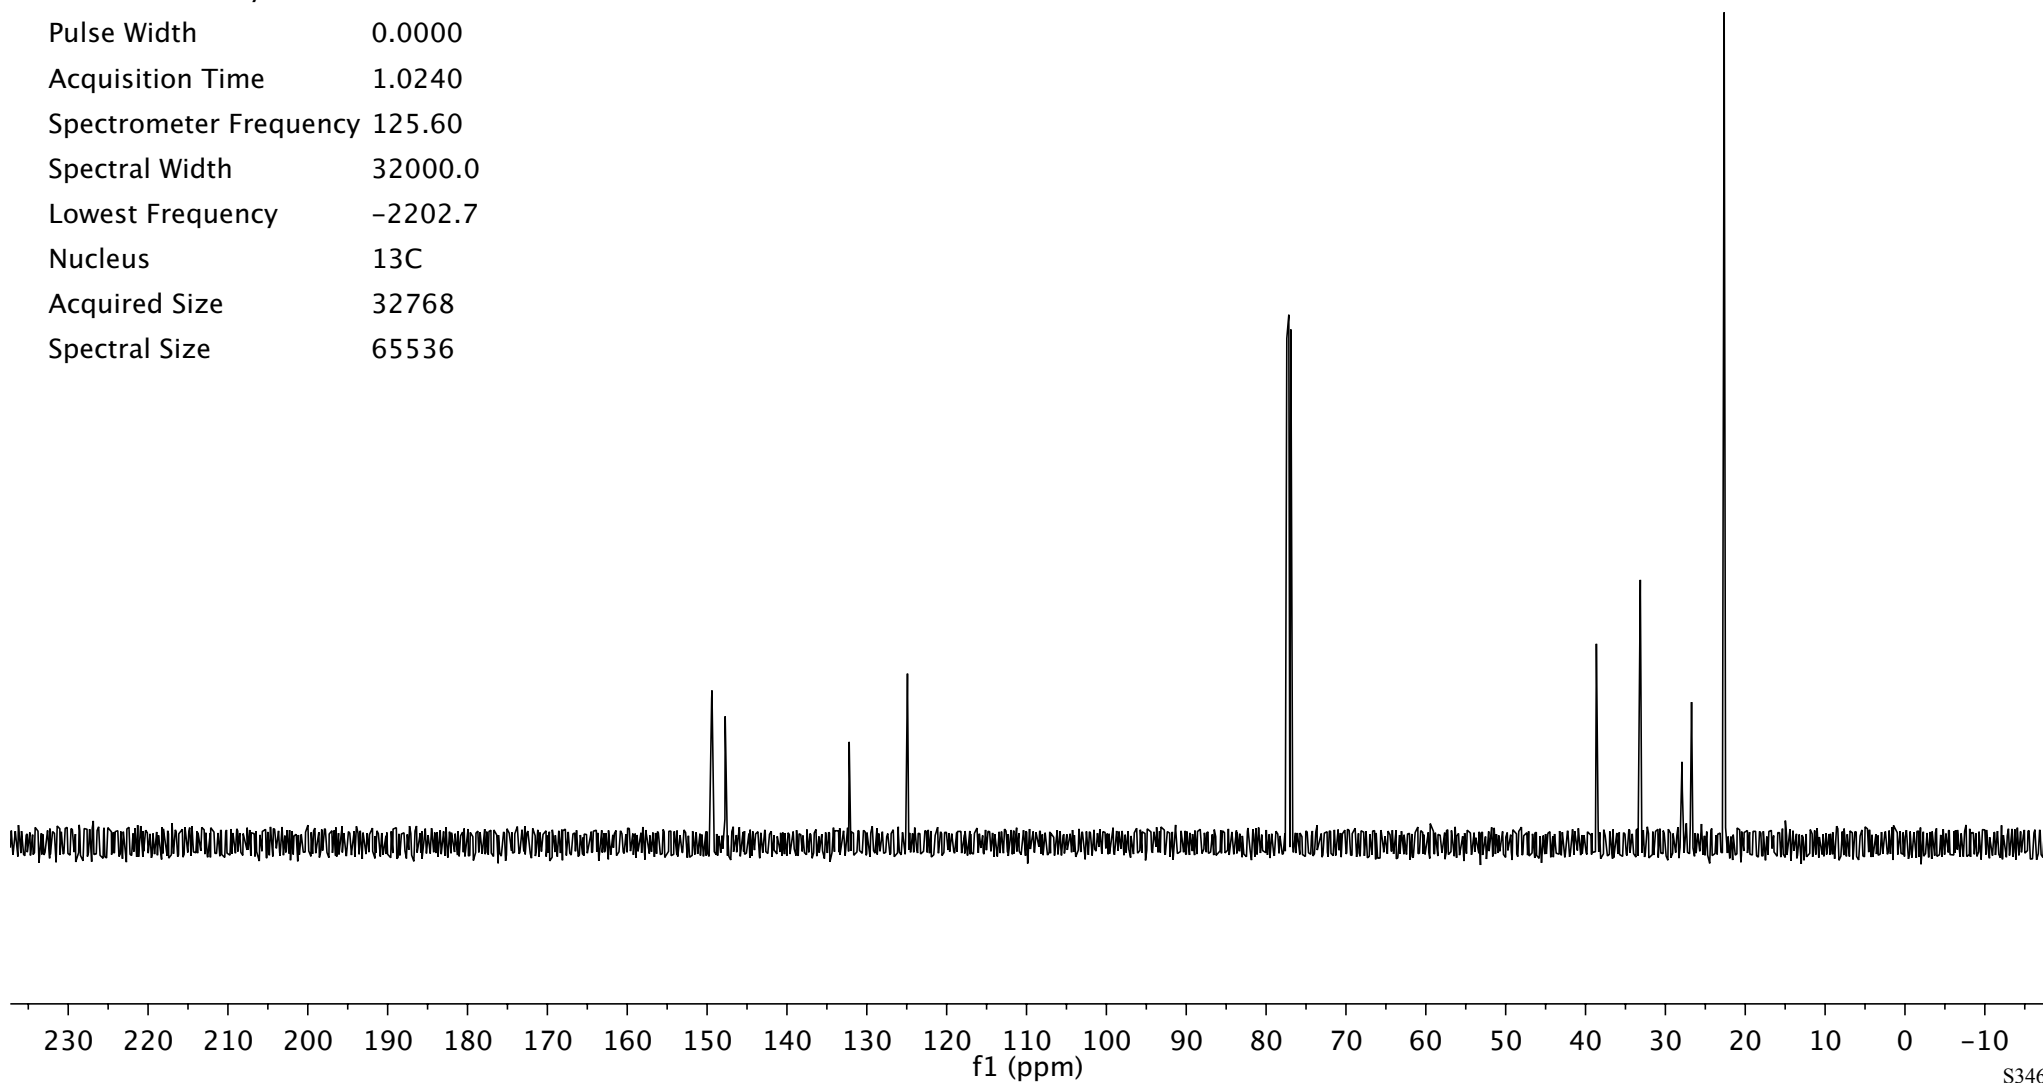

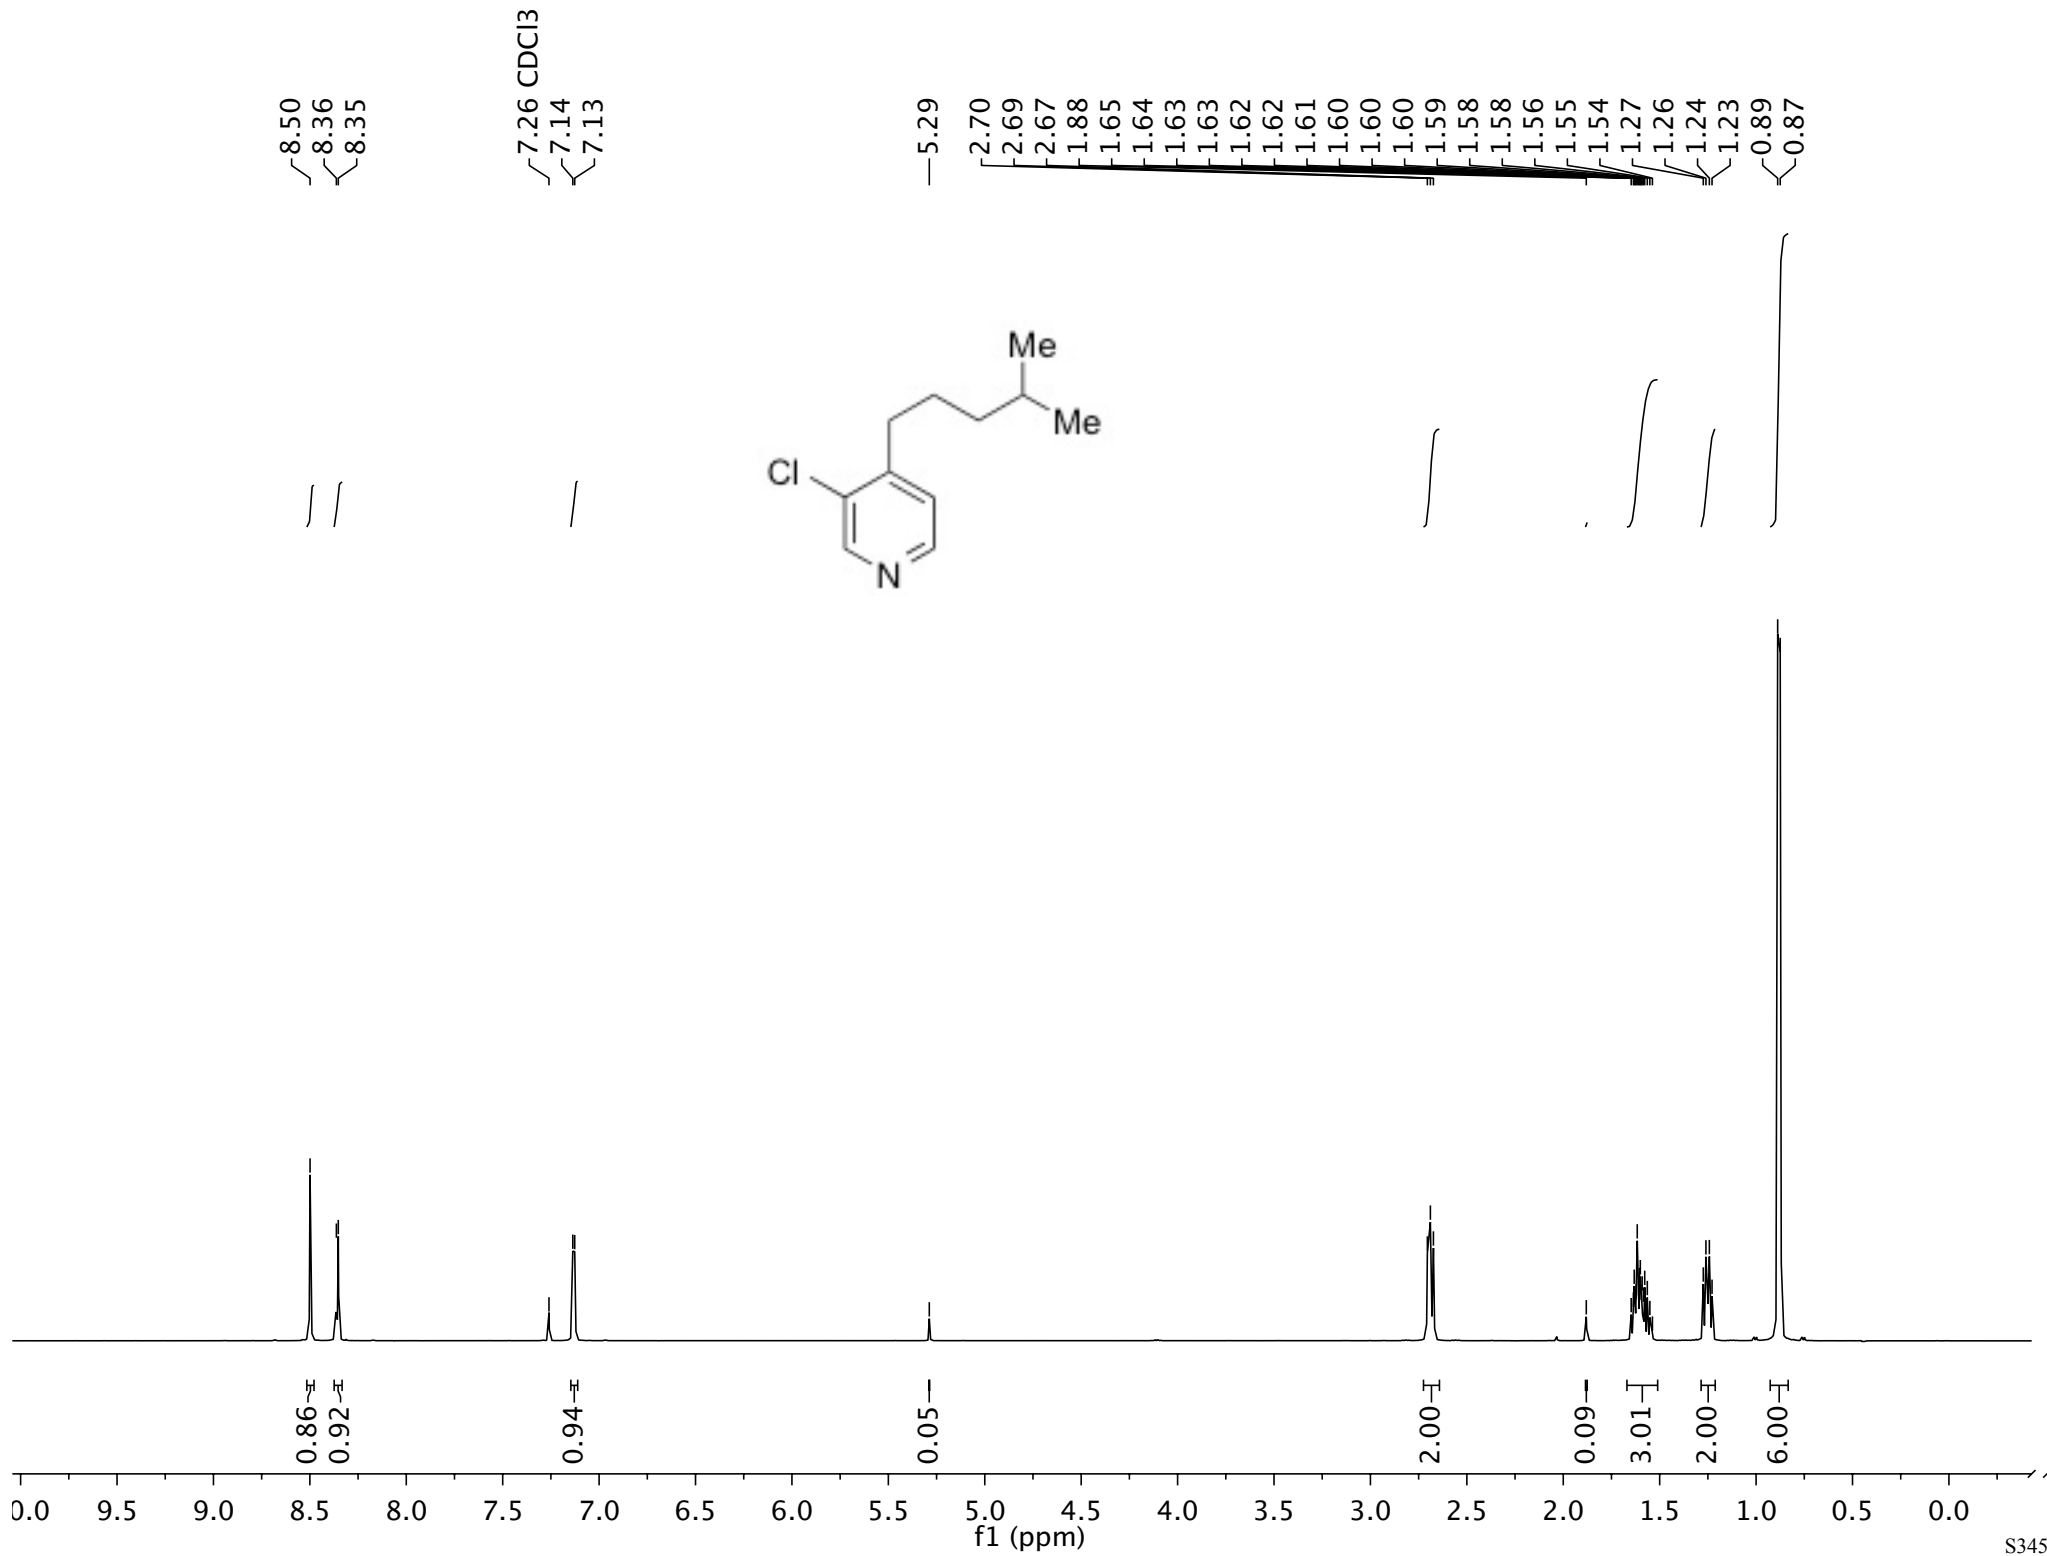

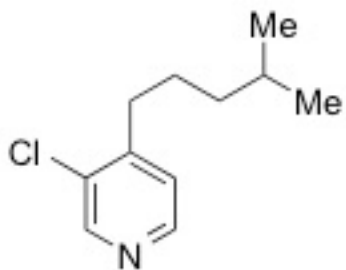

149.41  
149.22  
147.72

132.21

124.90

77.41 CDCl<sub>3</sub>  
77.16 CDCl<sub>3</sub>  
76.90 CDCl<sub>3</sub>

38.64

33.14

27.91

26.73

22.64

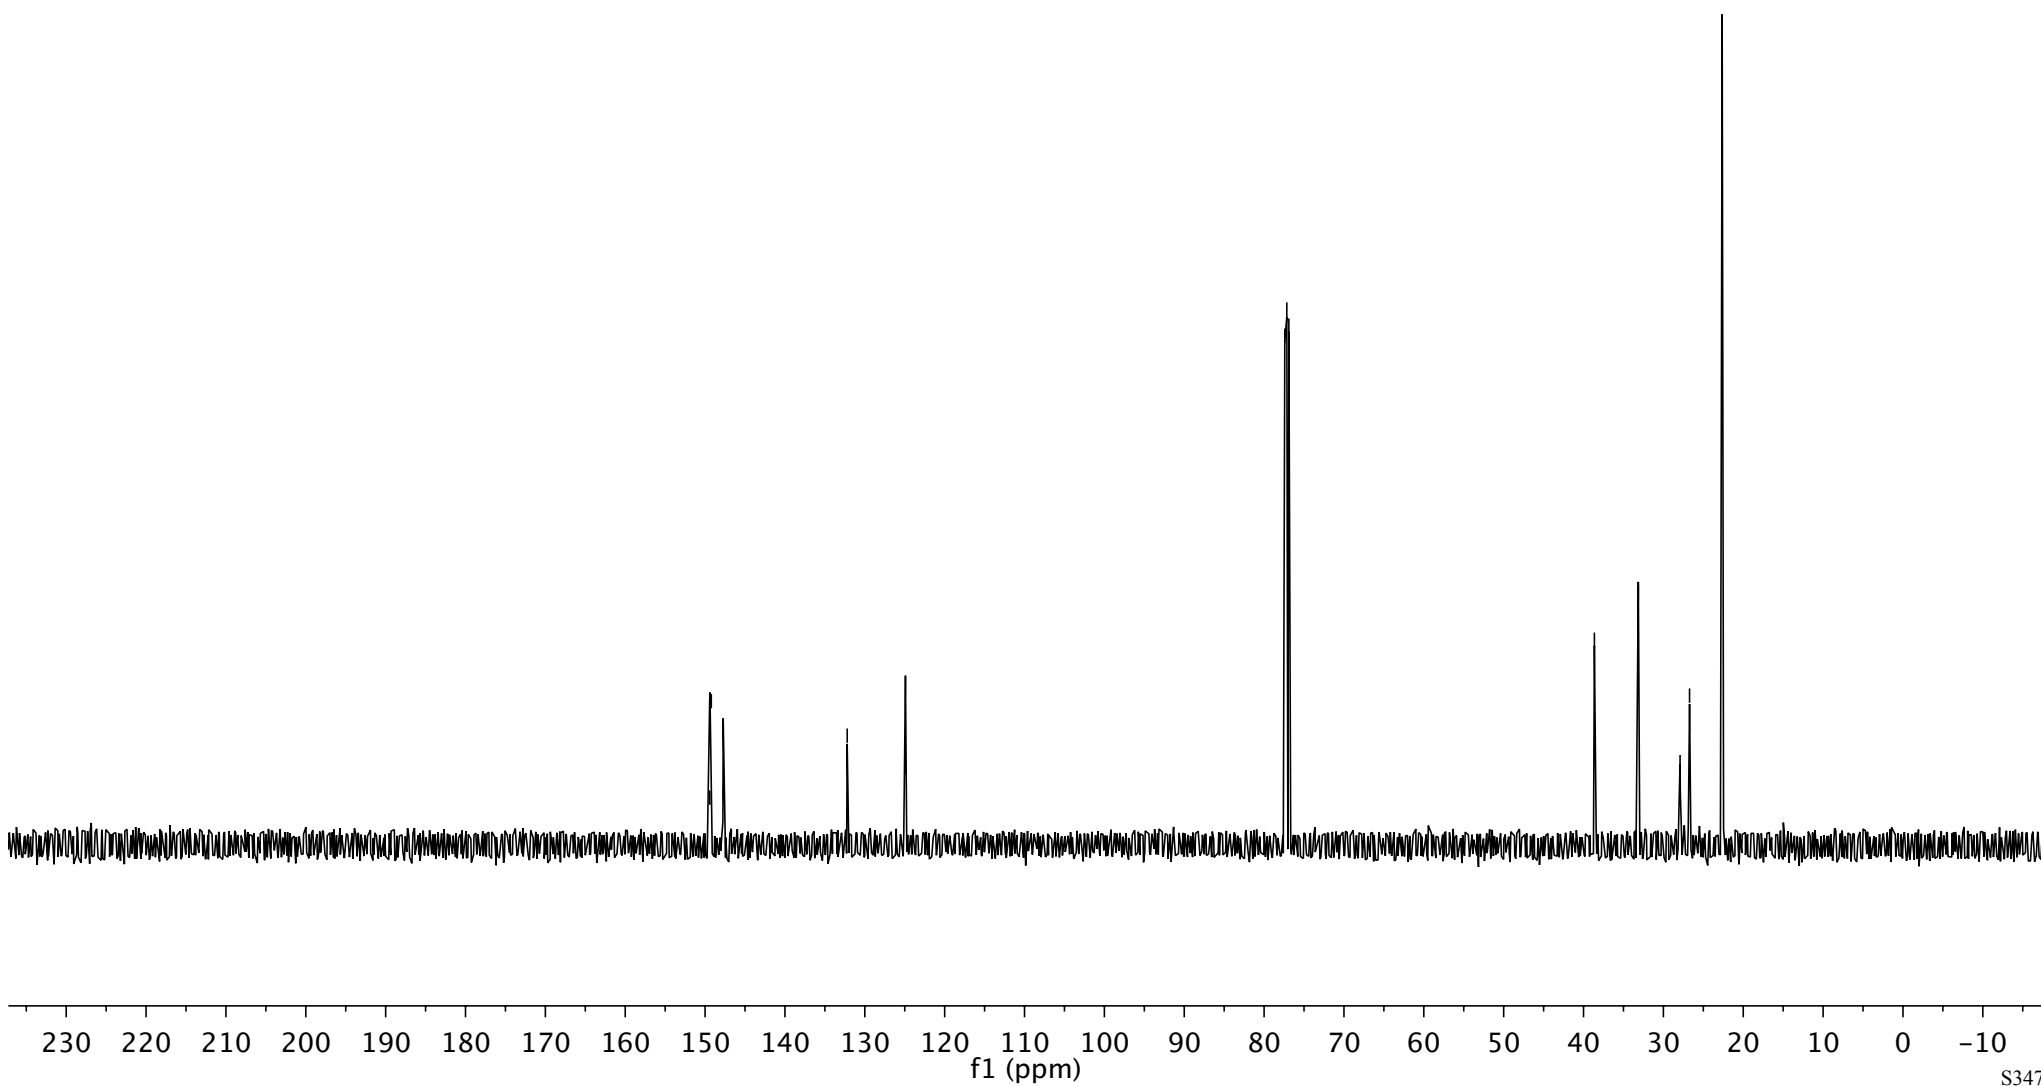

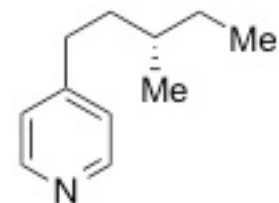

| Parameter              | Value   |
|------------------------|---------|
| Origin                 | Varian  |
| Spectrometer           | inova   |
| Solvent                | CDCl3   |
| Temperature            | 20.0    |
| Pulse Sequence         | s2pul   |
| Experiment             | 1D      |
| Probe                  | hcn     |
| Receiver Gain          | 22      |
| Relaxation Delay       | 0.0000  |
| Pulse Width            | 0.0000  |
| Acquisition Time       | 4.0960  |
| Spectrometer Frequency | 500.07  |
| Spectral Width         | 8000.0  |
| Lowest Frequency       | -1510.9 |
| Nucleus                | 1H      |
| Acquired Size          | 32768   |
| Spectral Size          | 65536   |

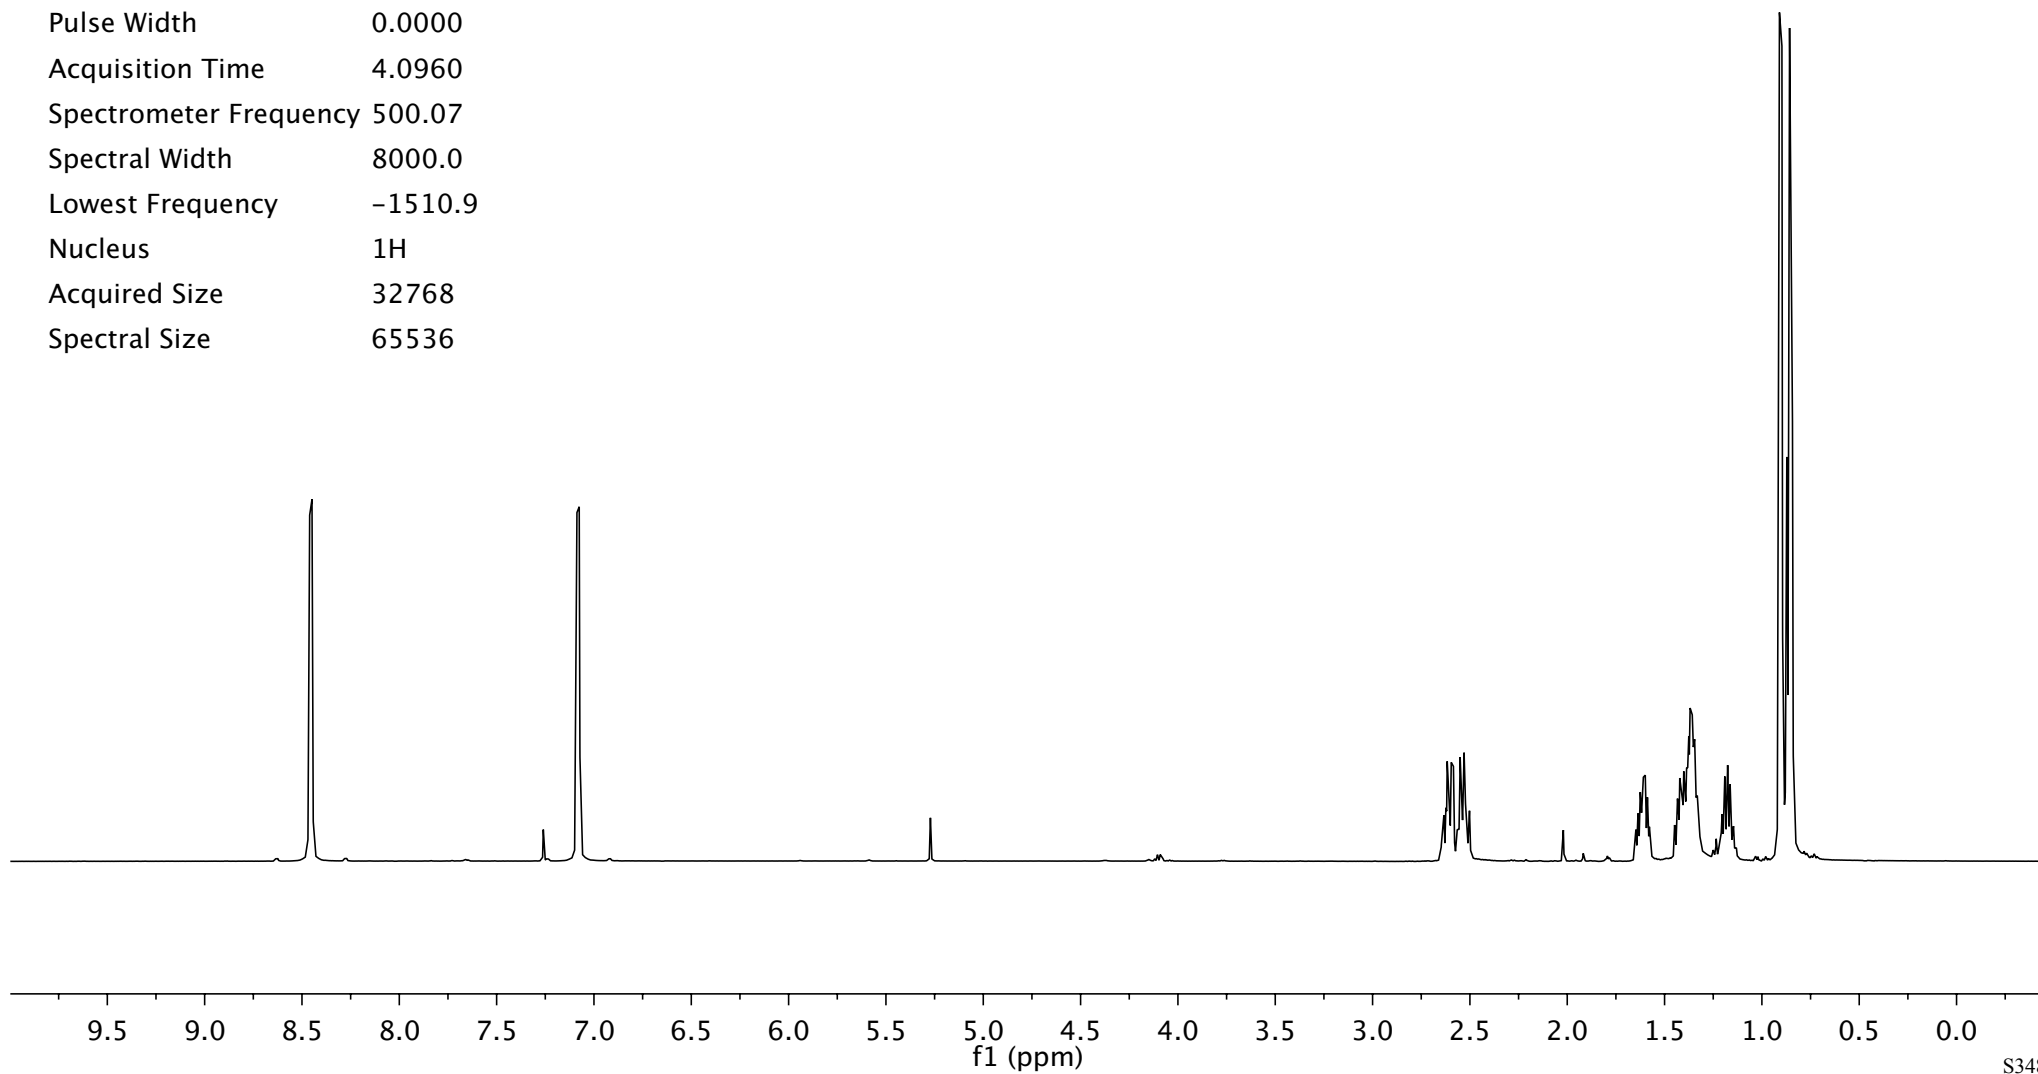

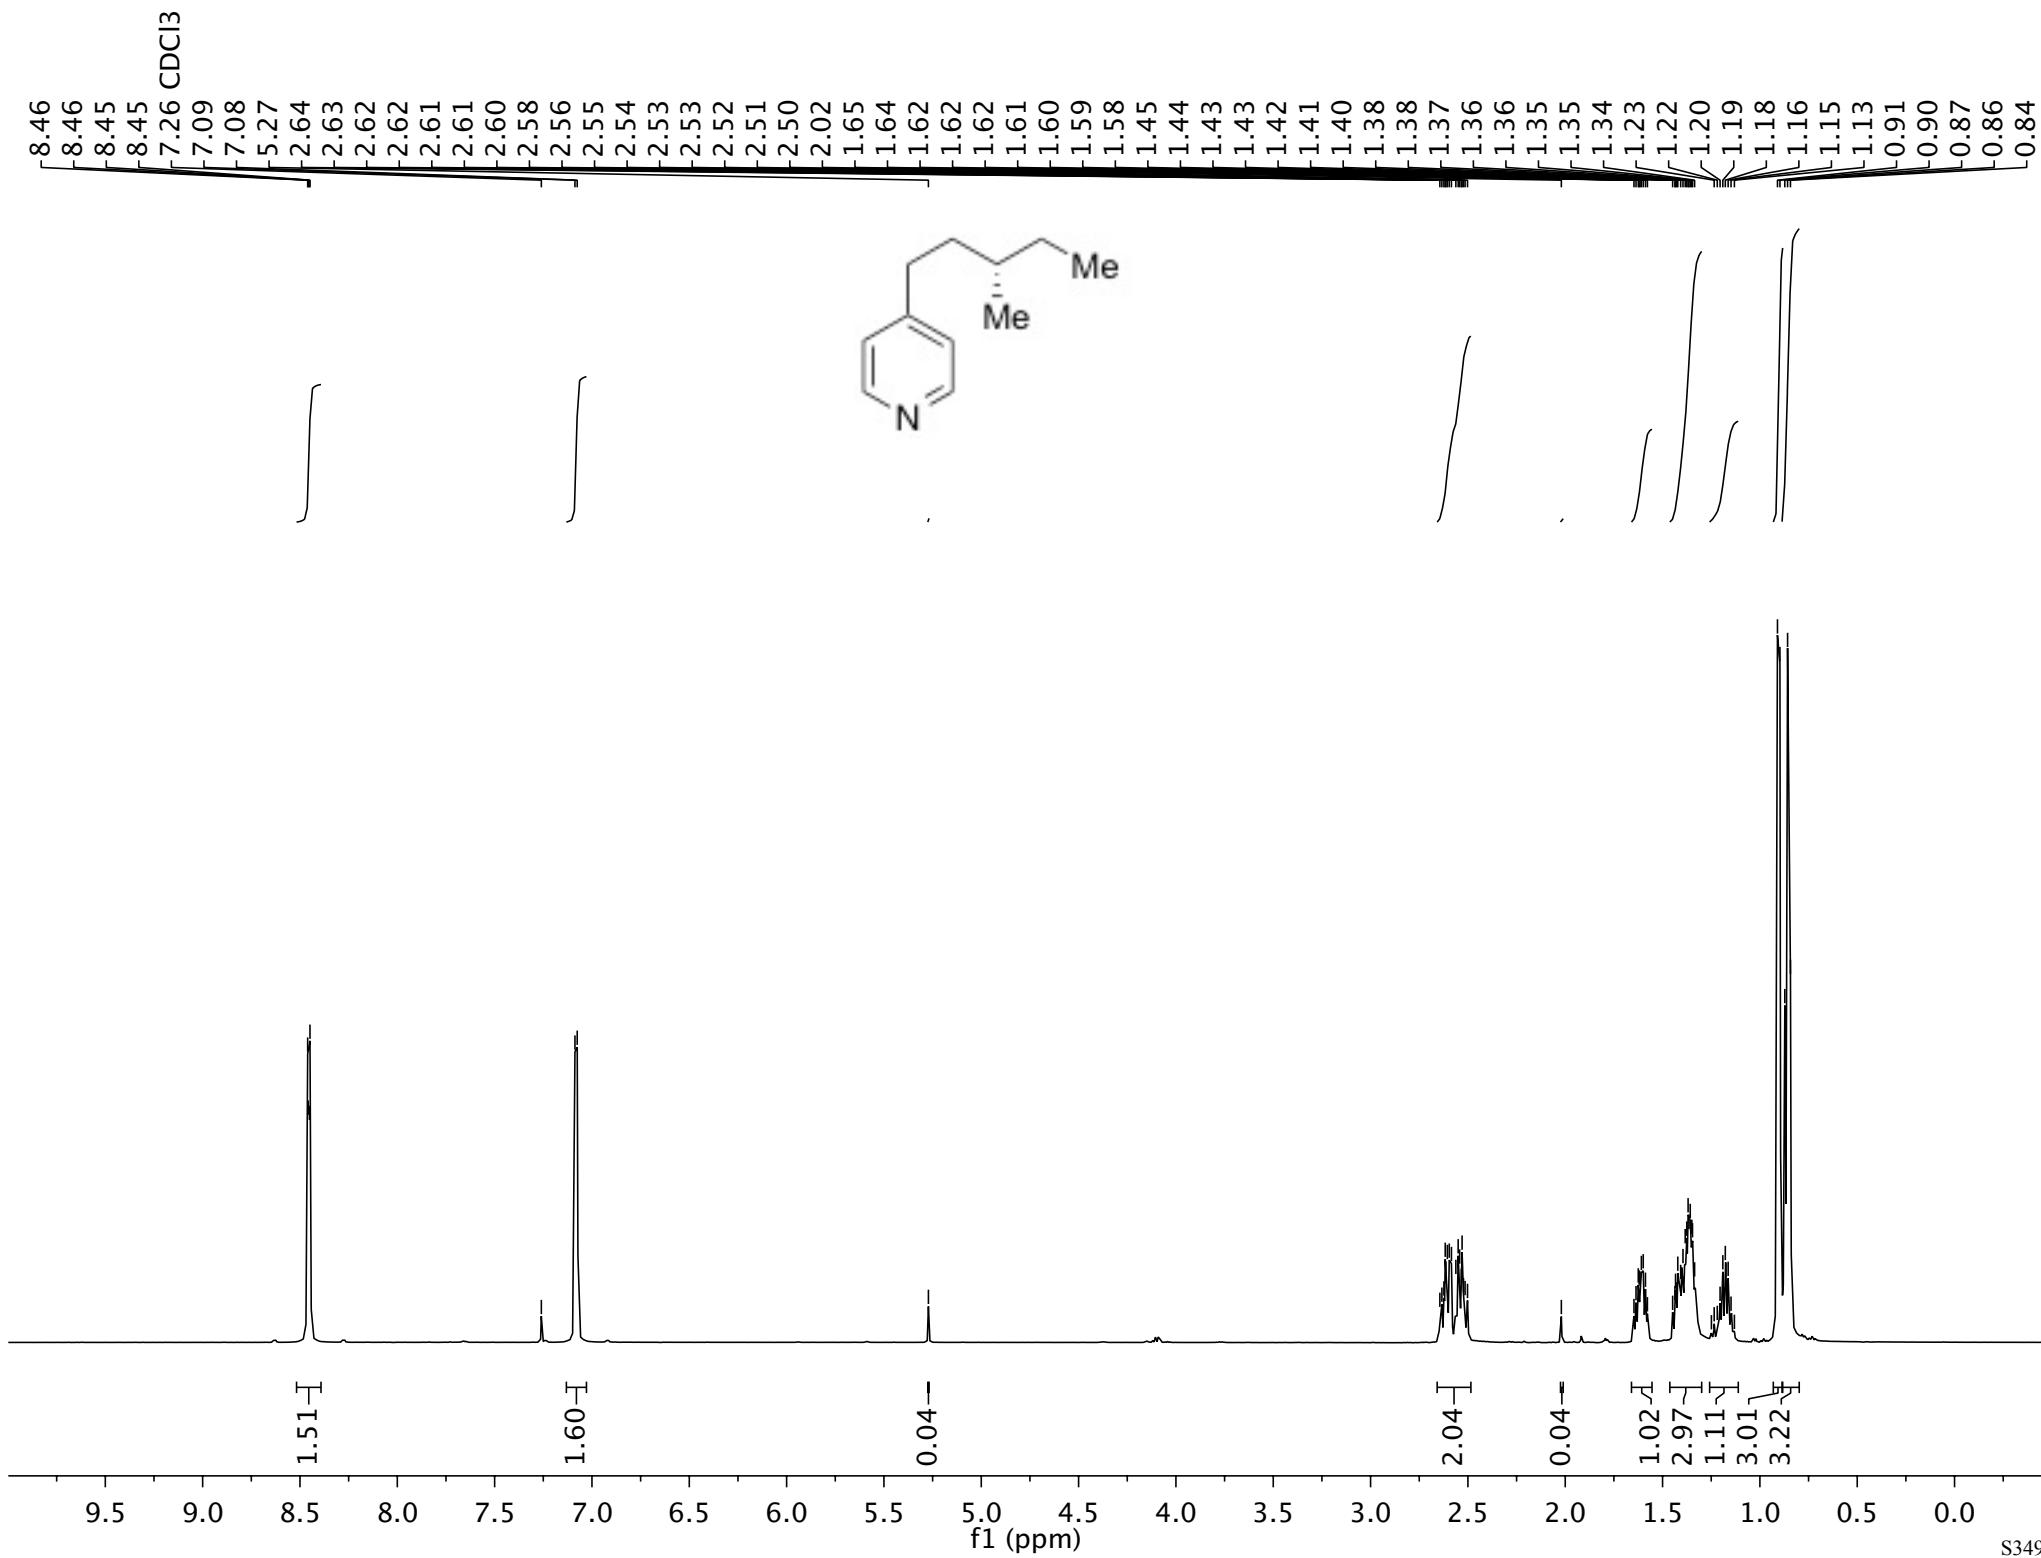

| Parameter              | Value   |
|------------------------|---------|
| Origin                 | Varian  |
| Spectrometer           | inova   |
| Solvent                | CDCl3   |
| Temperature            | 20.0    |
| Pulse Sequence         | s2pul   |
| Experiment             | 1D      |
| Probe                  | QUADG   |
| Receiver Gain          | 60      |
| Relaxation Delay       | 1.0000  |
| Pulse Width            | 0.0000  |
| Acquisition Time       | 1.0240  |
| Spectrometer Frequency | 125.60  |
| Spectral Width         | 32000.0 |
| Lowest Frequency       | -2204.6 |
| Nucleus                | 13C     |
| Acquired Size          | 32768   |
| Spectral Size          | 65536   |

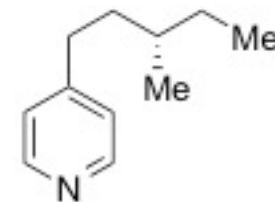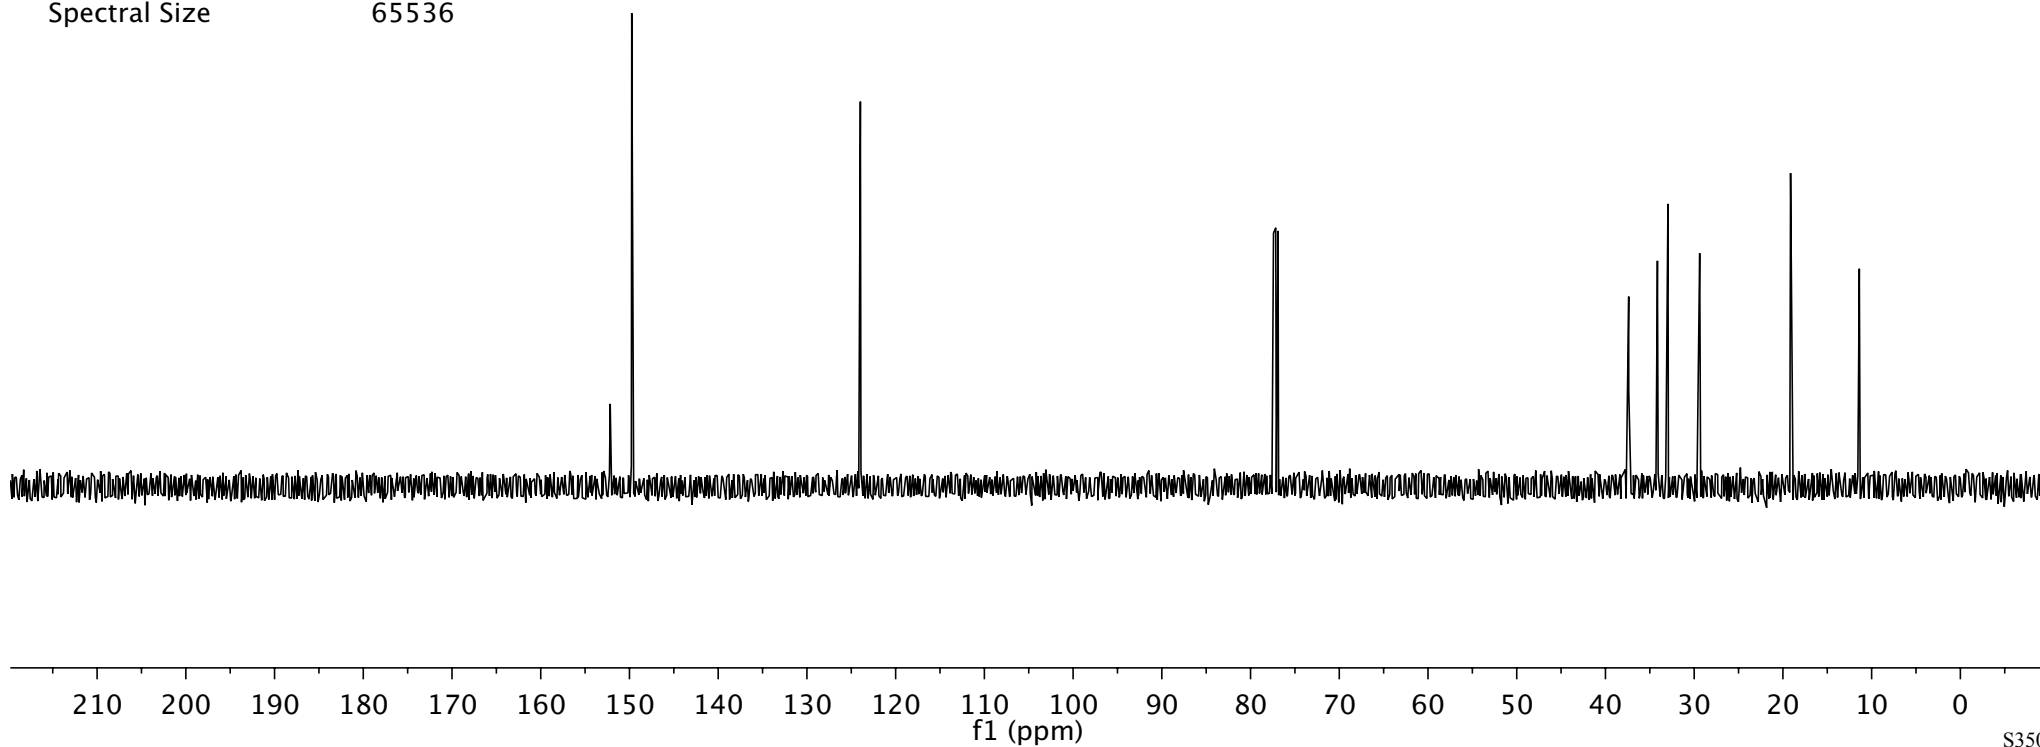

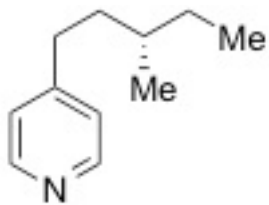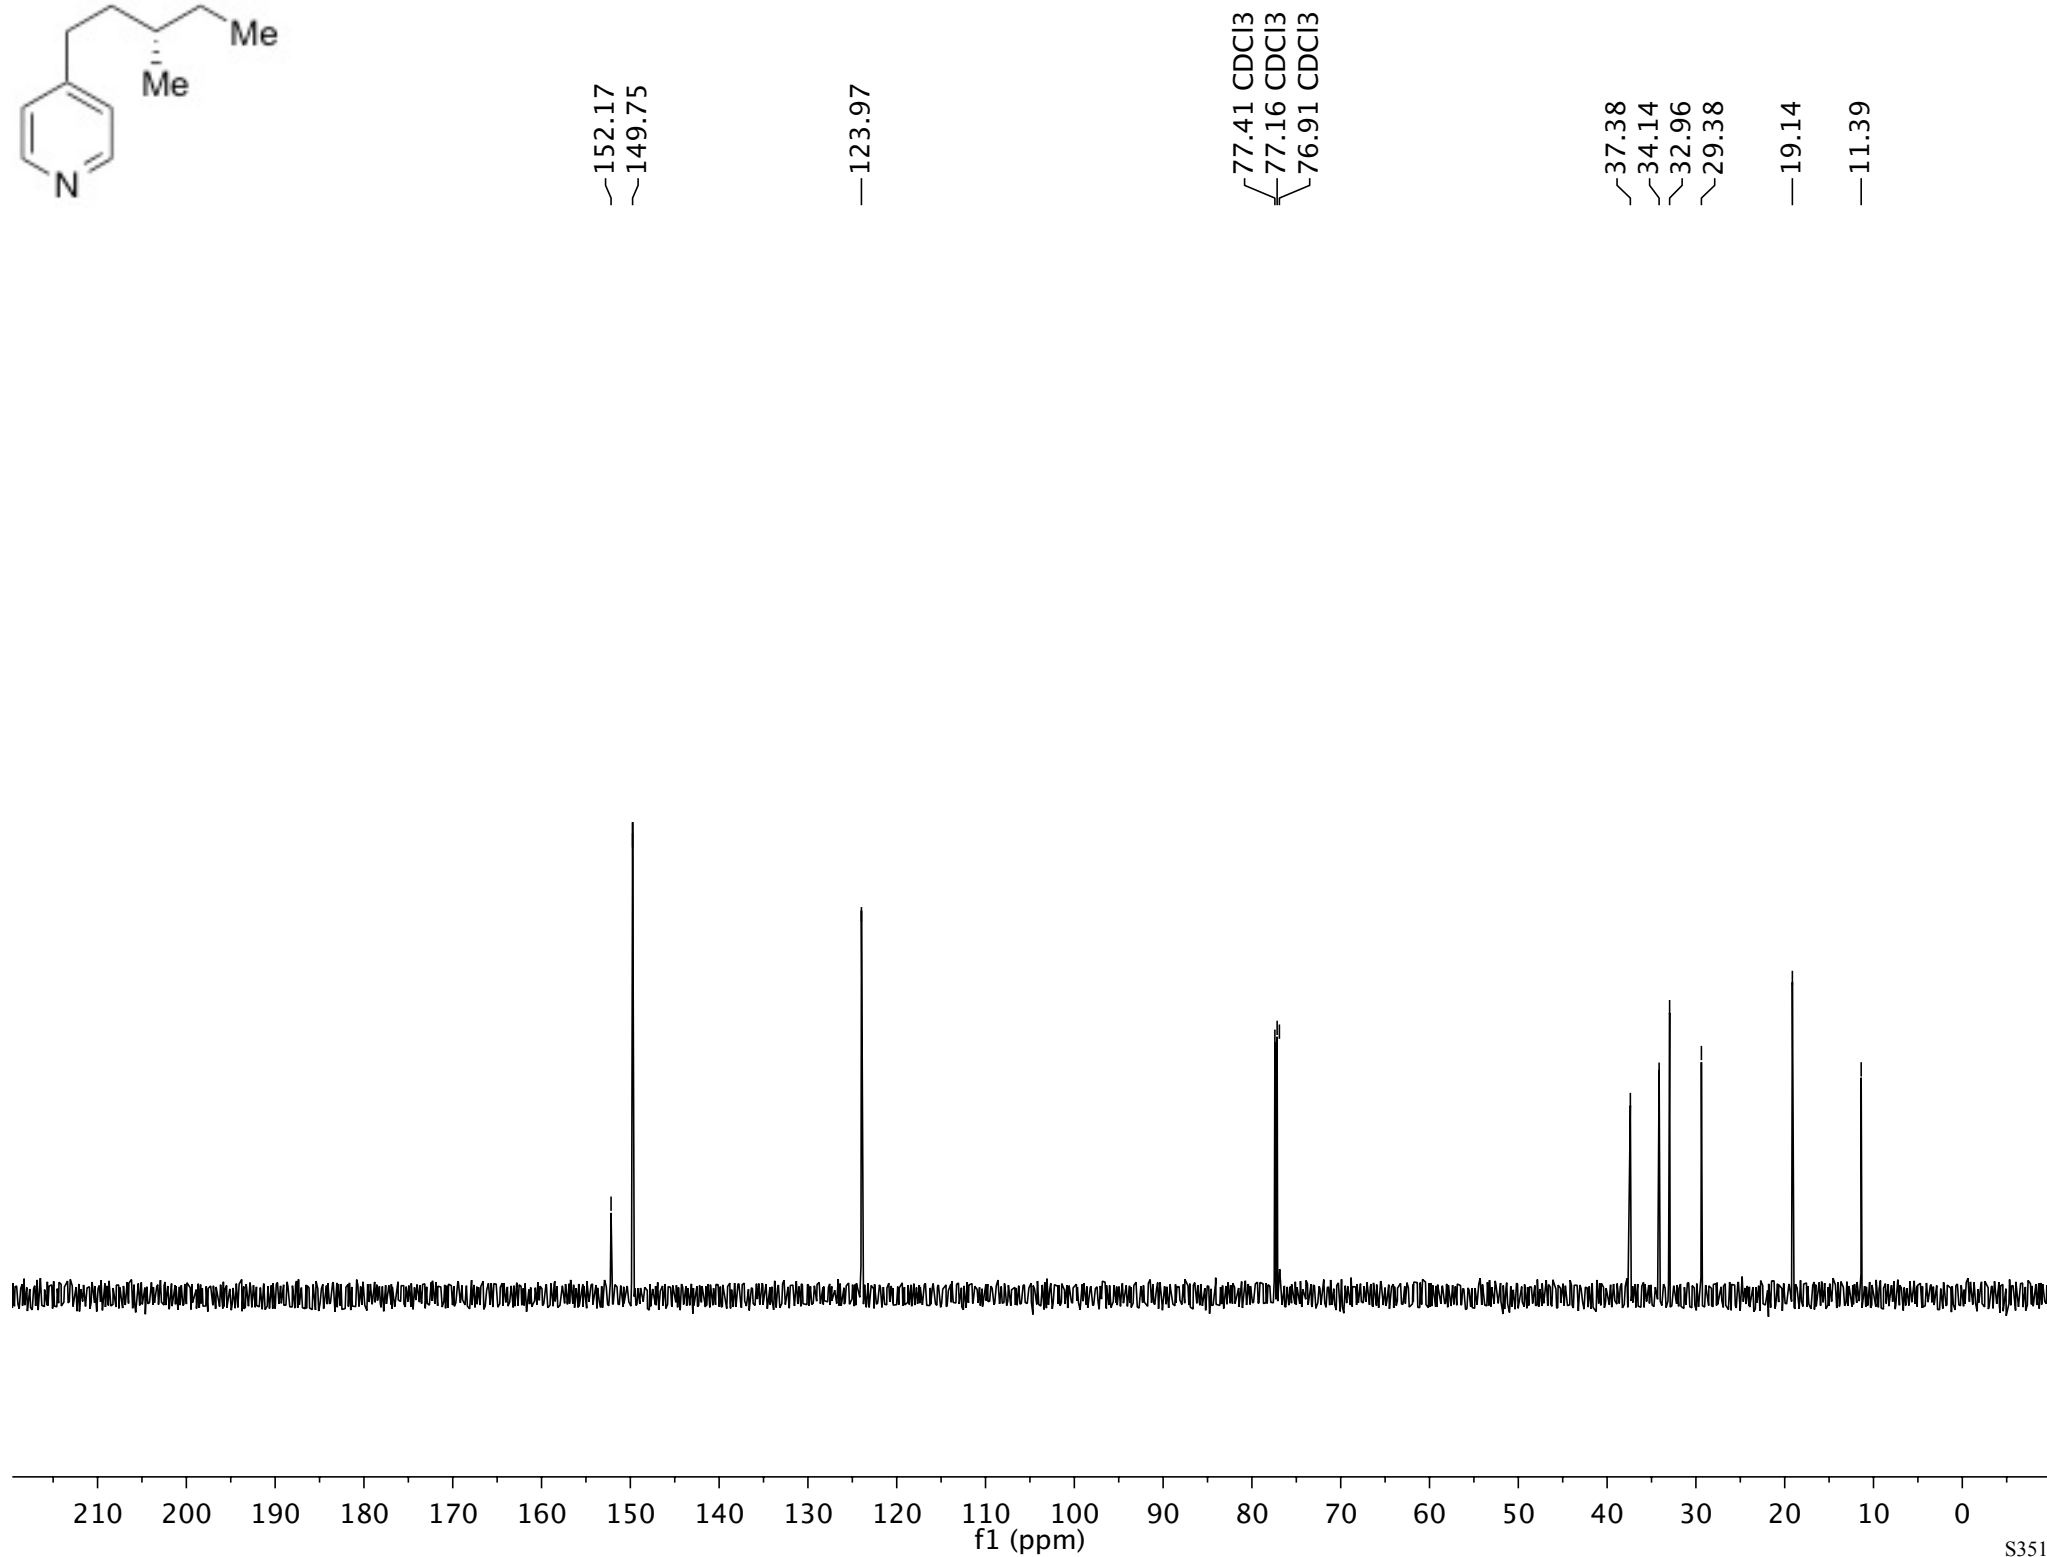



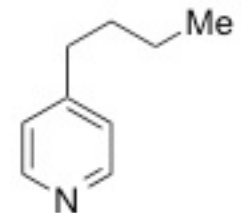

| Parameter              | Value          |
|------------------------|----------------|
| Origin                 | Varian         |
| Spectrometer           | inova          |
| Solvent                | CDCl3          |
| Temperature            | 20.0           |
| Pulse Sequence         | s2pul          |
| Experiment             | 1D             |
| Probe                  | quad94         |
| Receiver Gain          | 60             |
| Relaxation Delay       | 0.0000         |
| Pulse Width            | 0.0000         |
| Acquisition Time       | 4.0960         |
| Spectrometer Frequency | 399.95         |
| Spectral Width         | 8000.0         |
| Lowest Frequency       | -2424.5        |
| Nucleus                | <sup>1</sup> H |
| Acquired Size          | 32768          |
| Spectral Size          | 65536          |

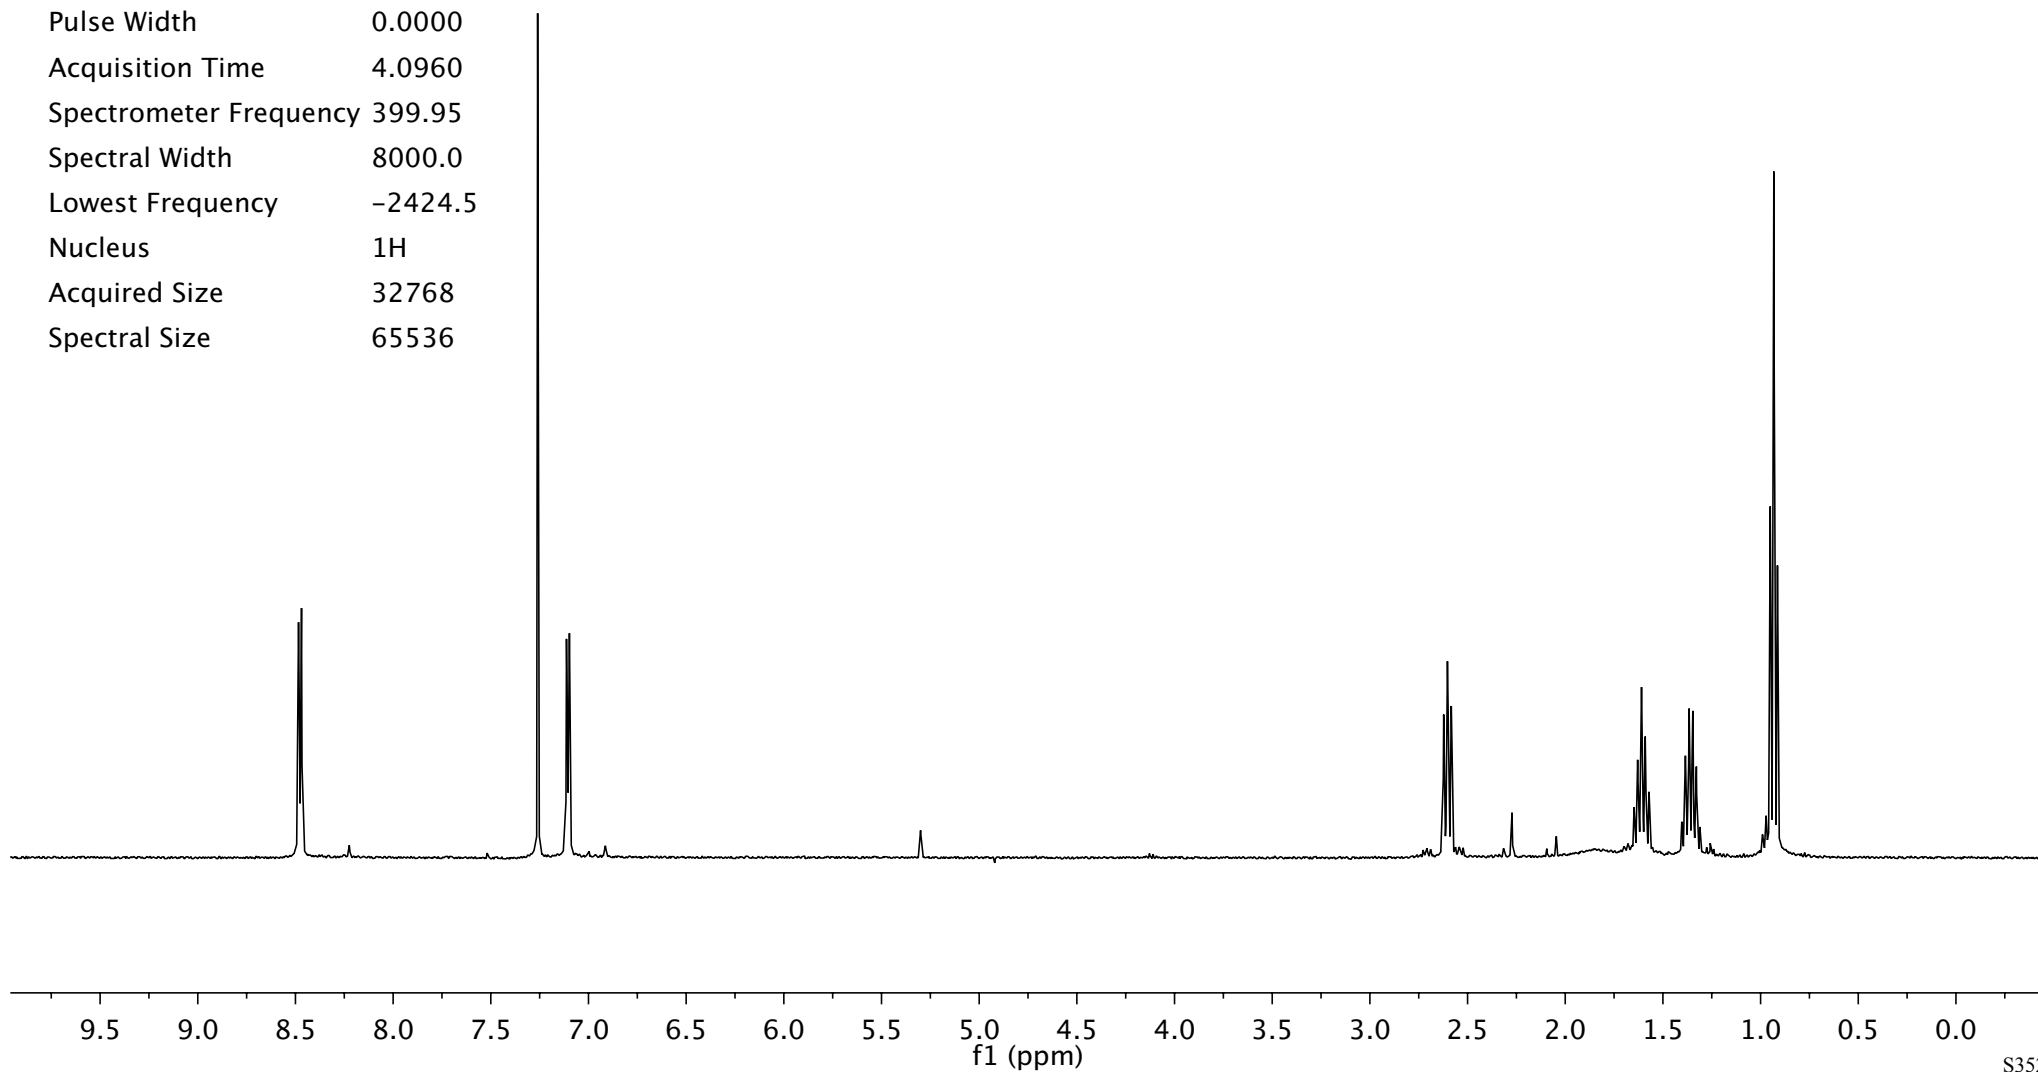

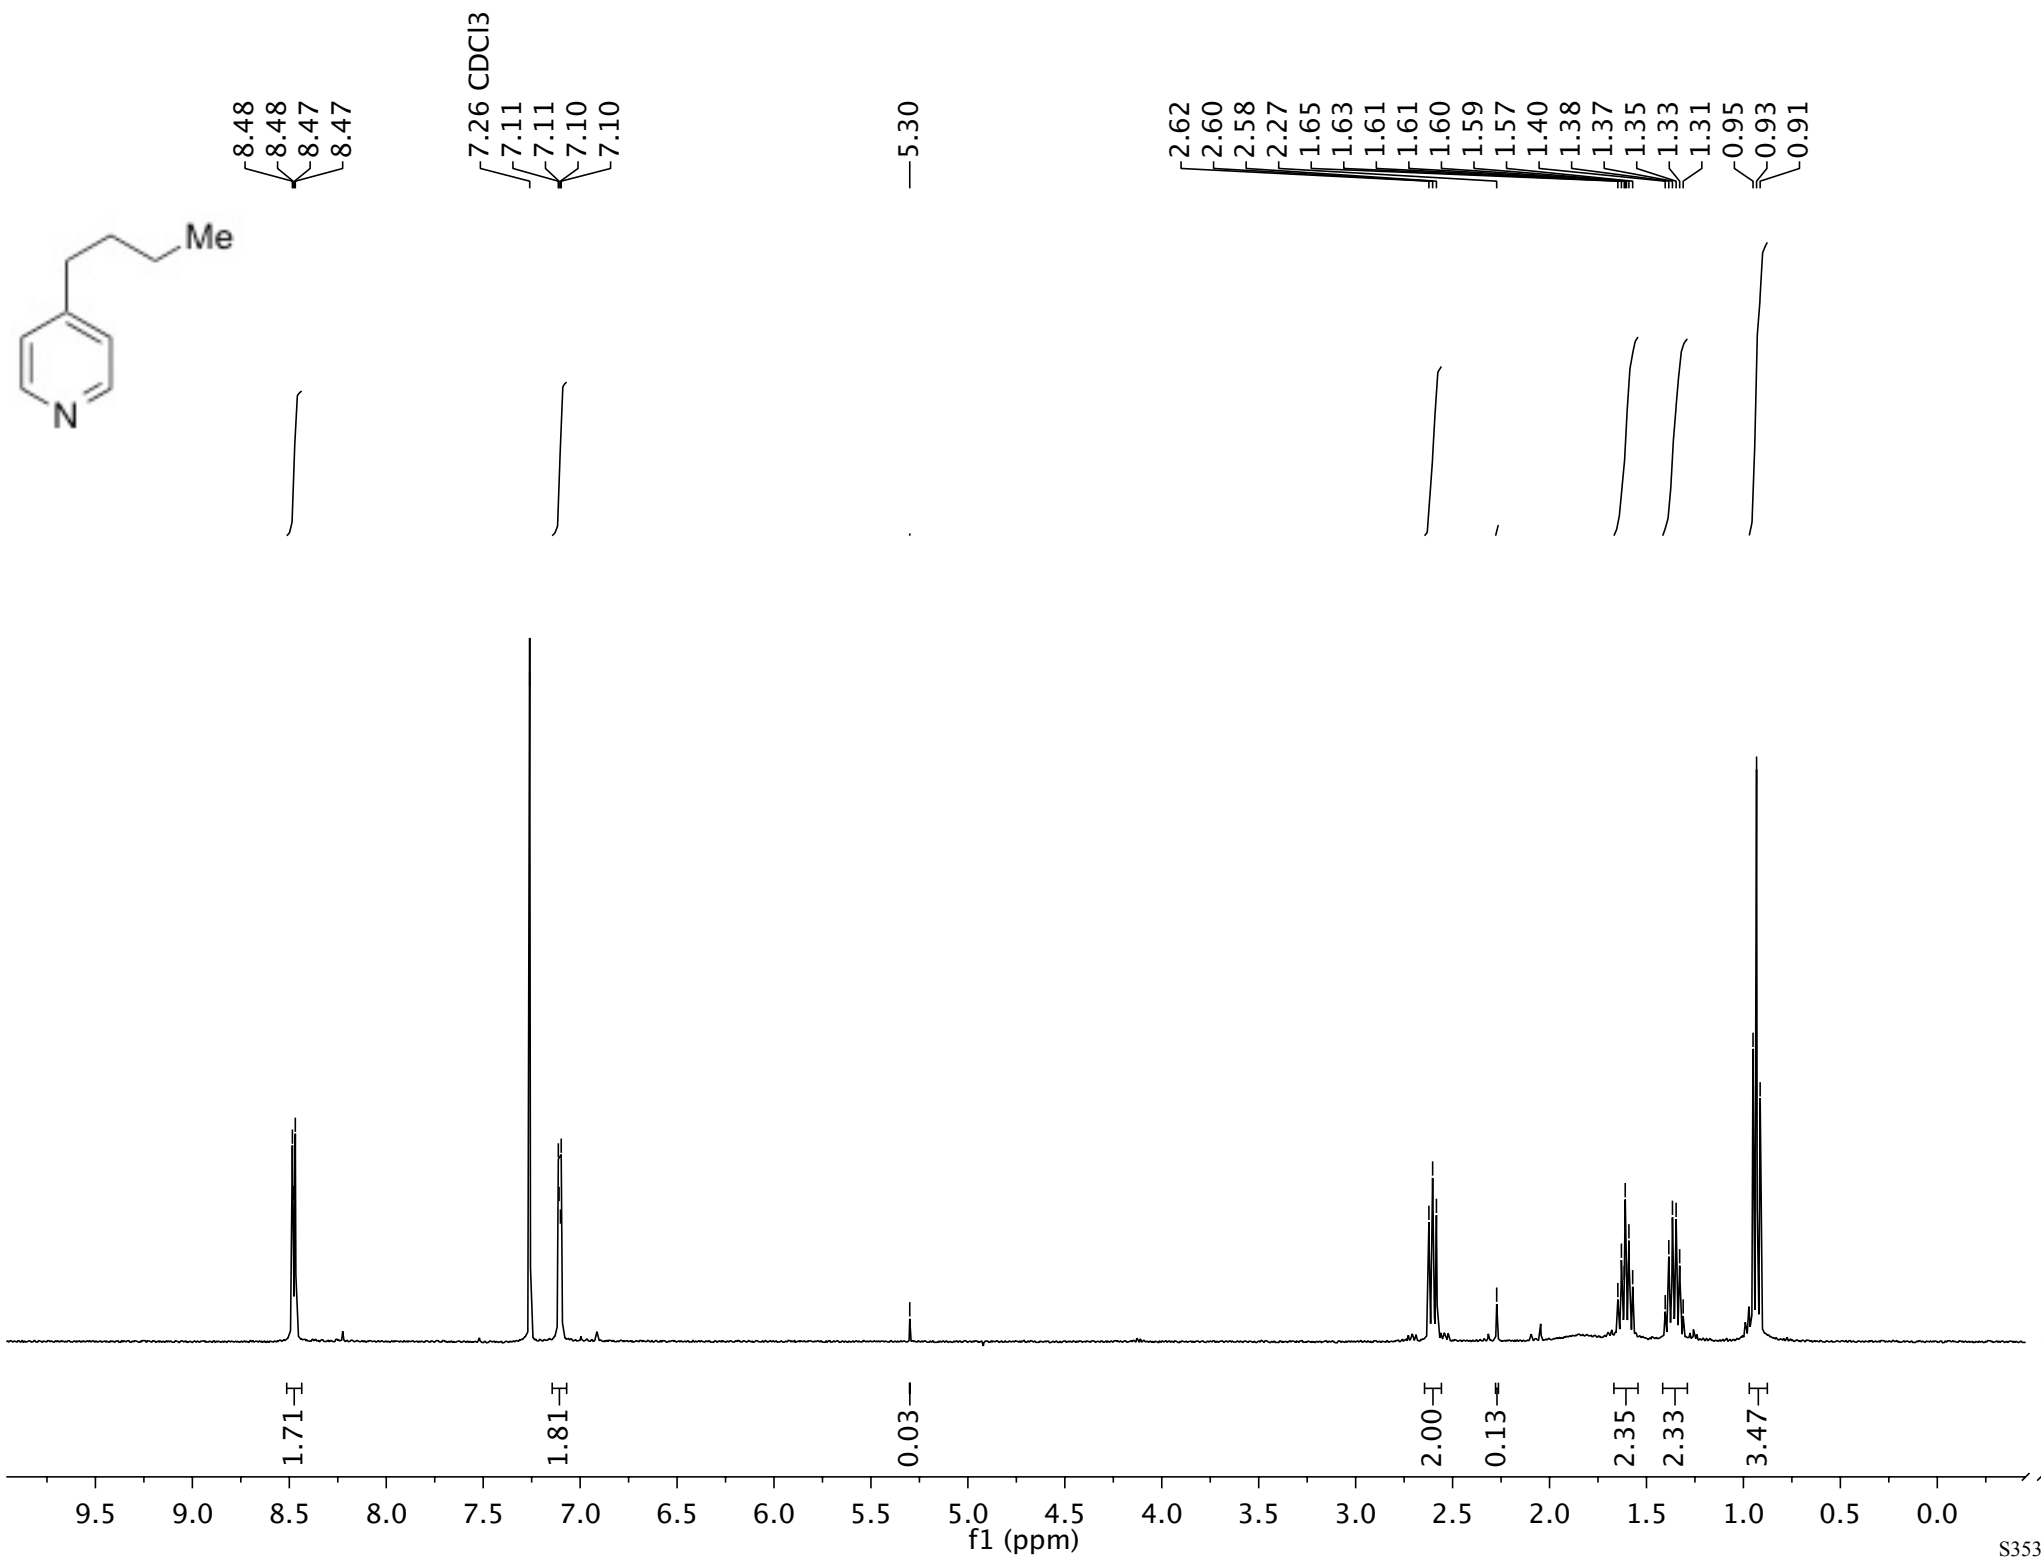

| Parameter              | Value   |
|------------------------|---------|
| Origin                 | Varian  |
| Spectrometer           | inova   |
| Solvent                | CDCl3   |
| Temperature            | 20.0    |
| Pulse Sequence         | s2pul   |
| Experiment             | 1D      |
| Probe                  | QUADG   |
| Receiver Gain          | 60      |
| Relaxation Delay       | 2.0000  |
| Pulse Width            | 0.0000  |
| Acquisition Time       | 1.0240  |
| Spectrometer Frequency | 125.60  |
| Spectral Width         | 32000.0 |
| Lowest Frequency       | -2199.3 |
| Nucleus                | 13C     |
| Acquired Size          | 32768   |
| Spectral Size          | 65536   |

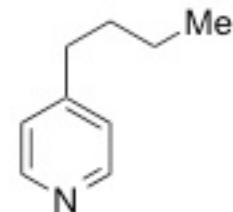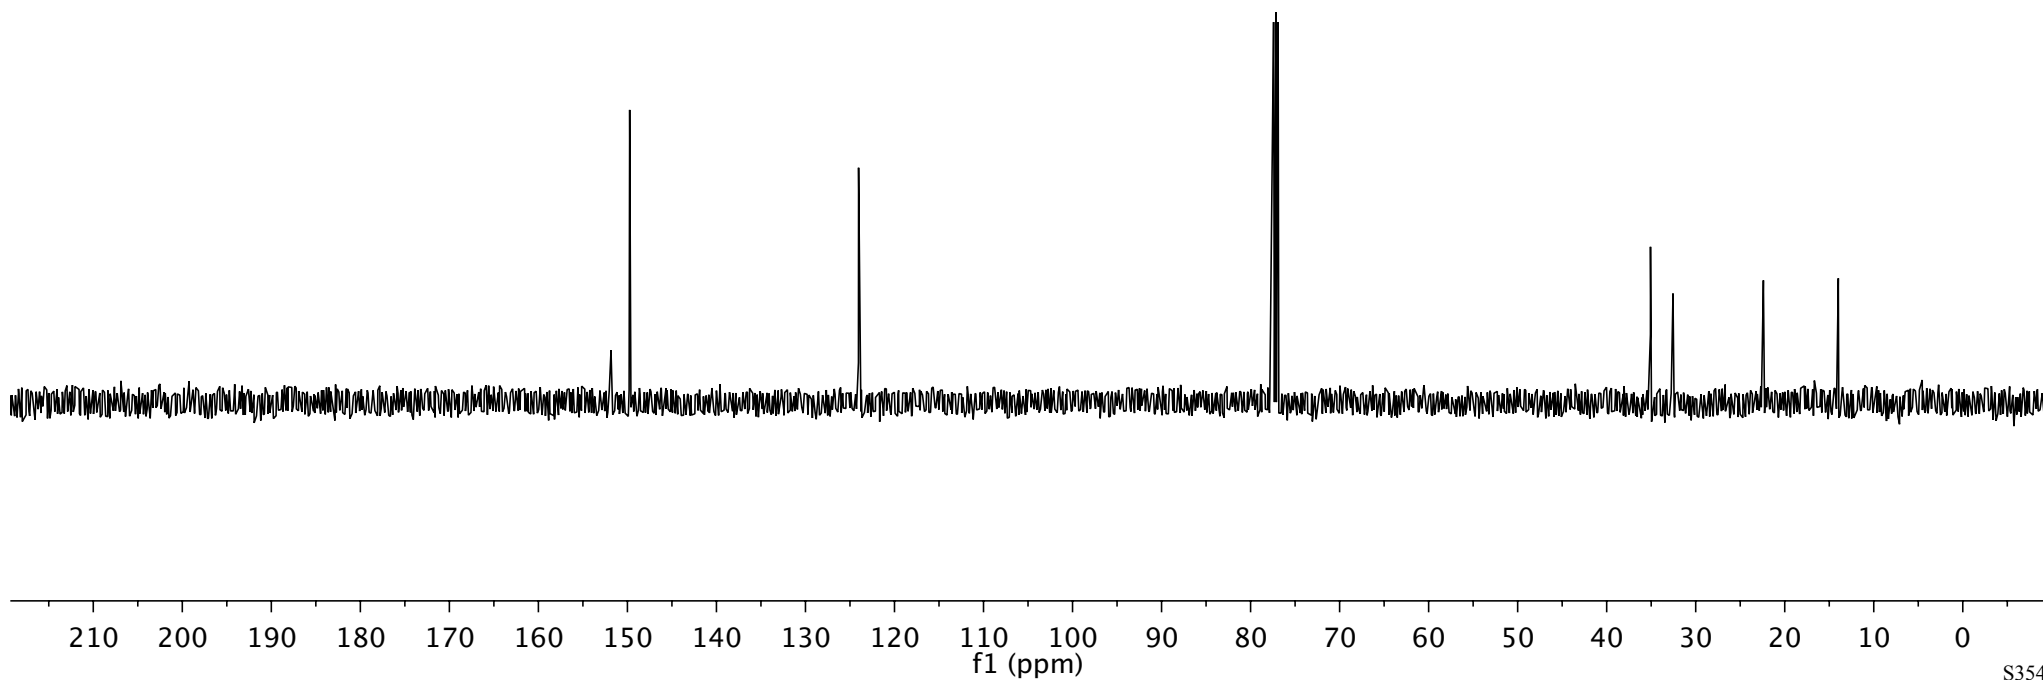

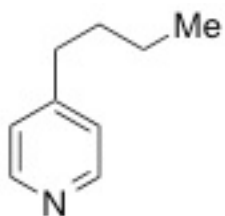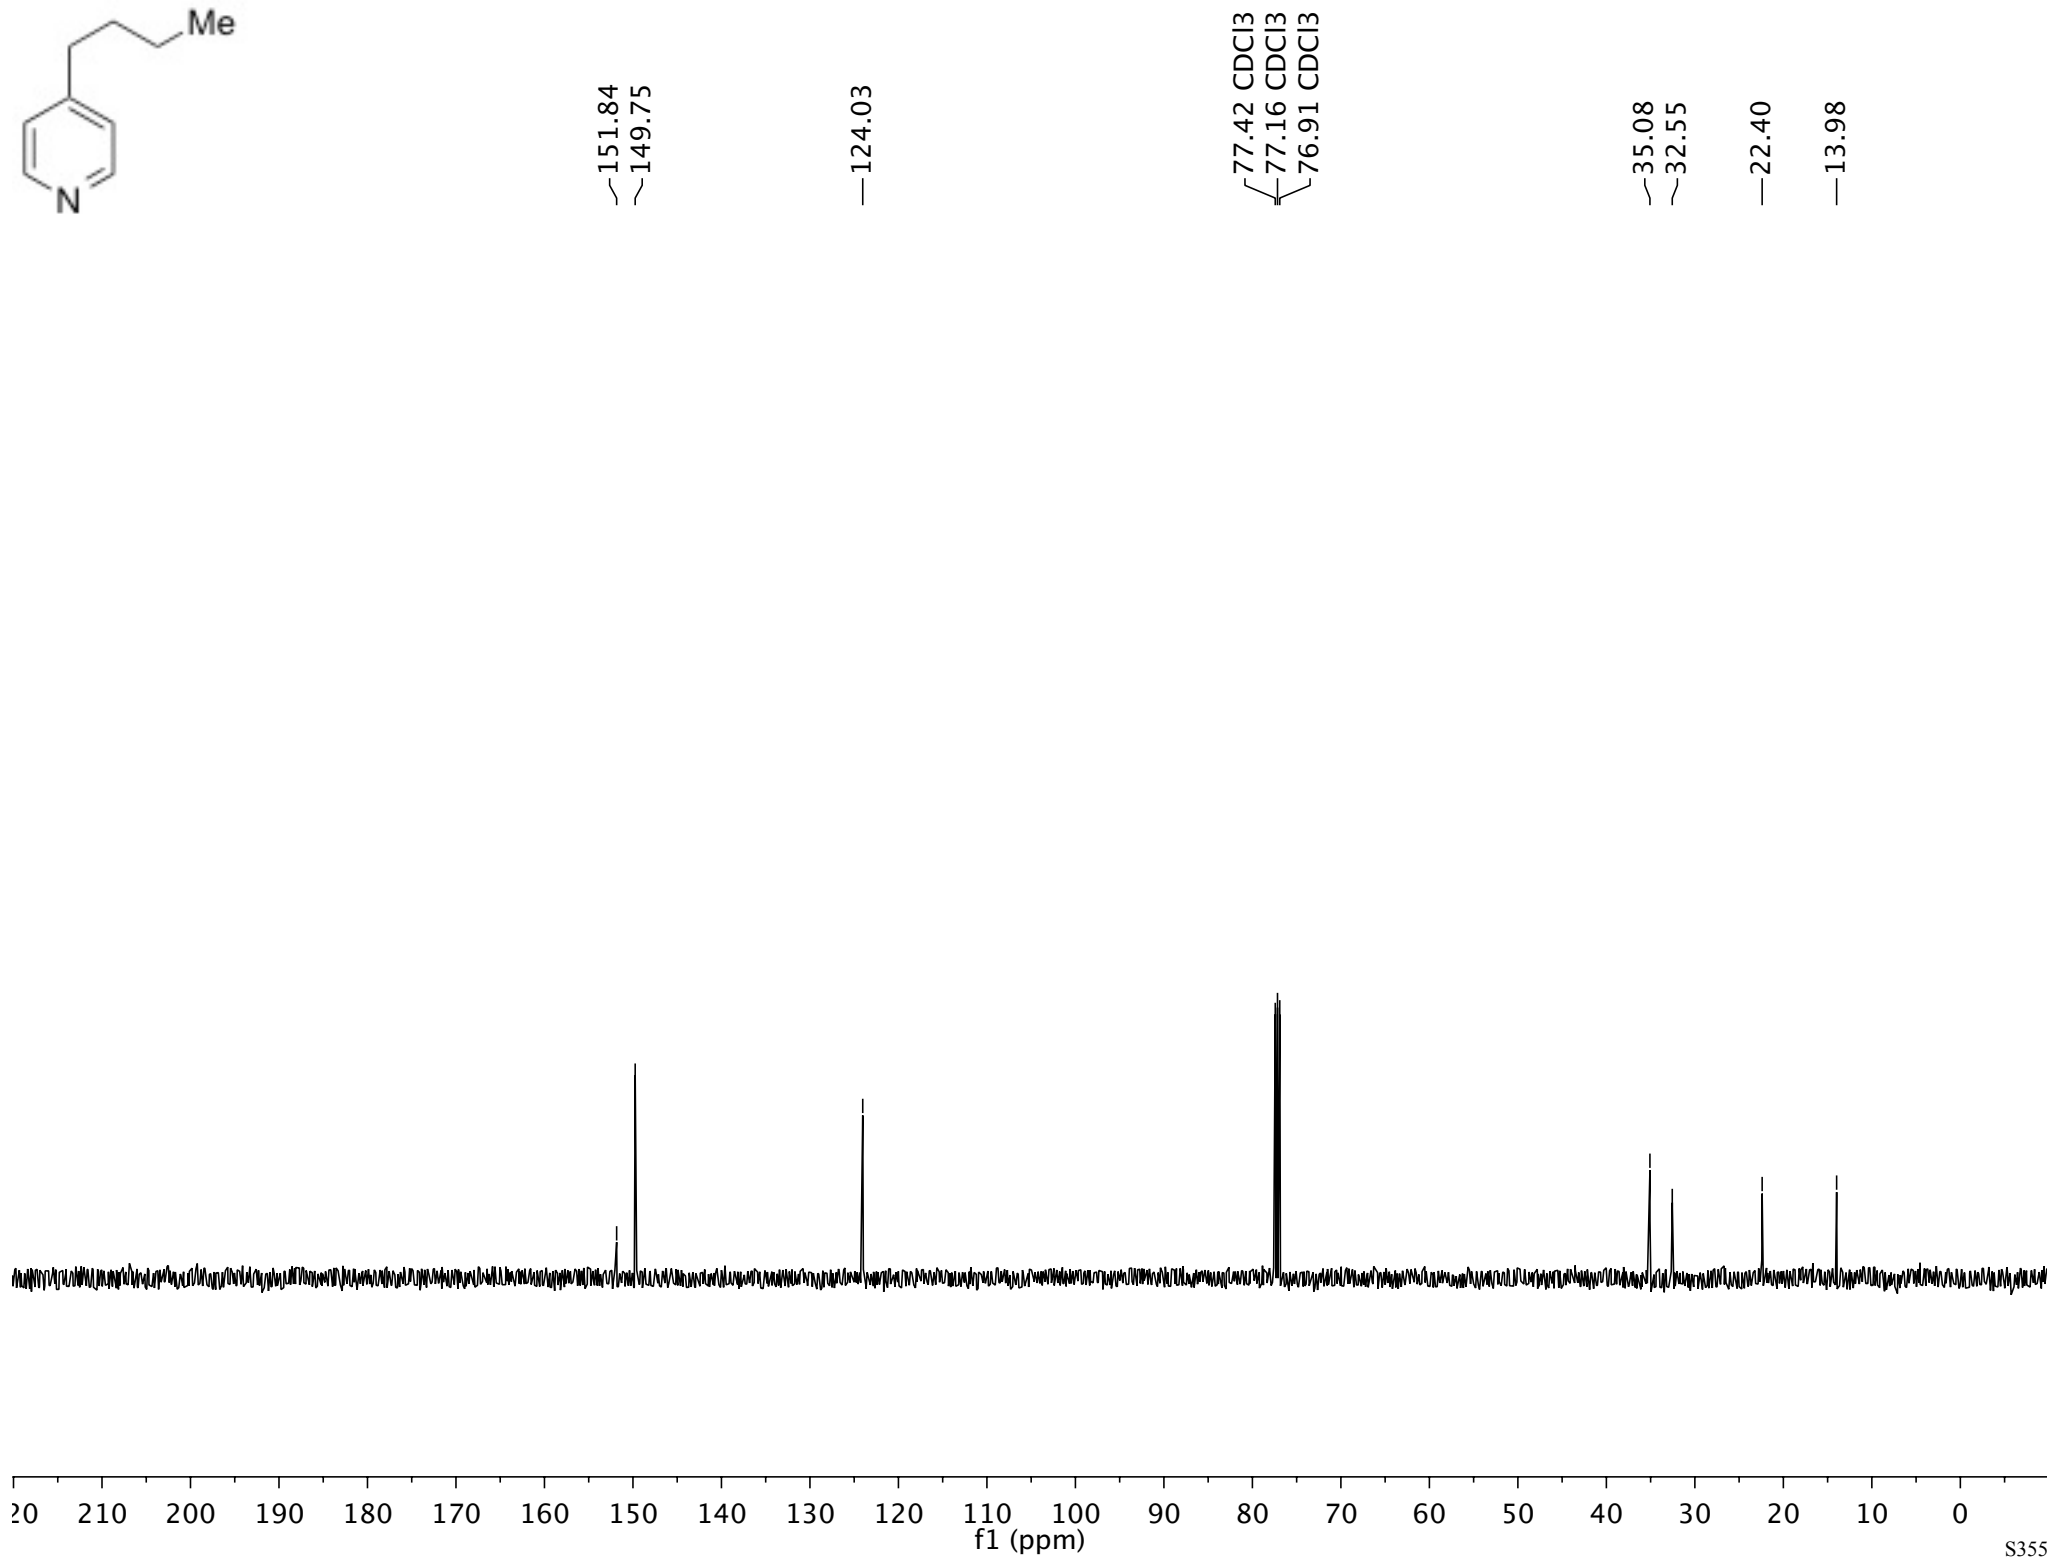

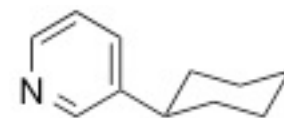

| Parameter              | Value          |
|------------------------|----------------|
| Origin                 | Varian         |
| Spectrometer           | inova          |
| Solvent                | CDCl3          |
| Temperature            | 20.0           |
| Pulse Sequence         | s2pul          |
| Experiment             | 1D             |
| Probe                  | hcn            |
| Receiver Gain          | 22             |
| Relaxation Delay       | 15.0000        |
| Pulse Width            | 0.0000         |
| Acquisition Time       | 4.0960         |
| Spectrometer Frequency | 500.07         |
| Spectral Width         | 8000.0         |
| Lowest Frequency       | -1521.1        |
| Nucleus                | <sup>1</sup> H |
| Acquired Size          | 32768          |
| Spectral Size          | 65536          |

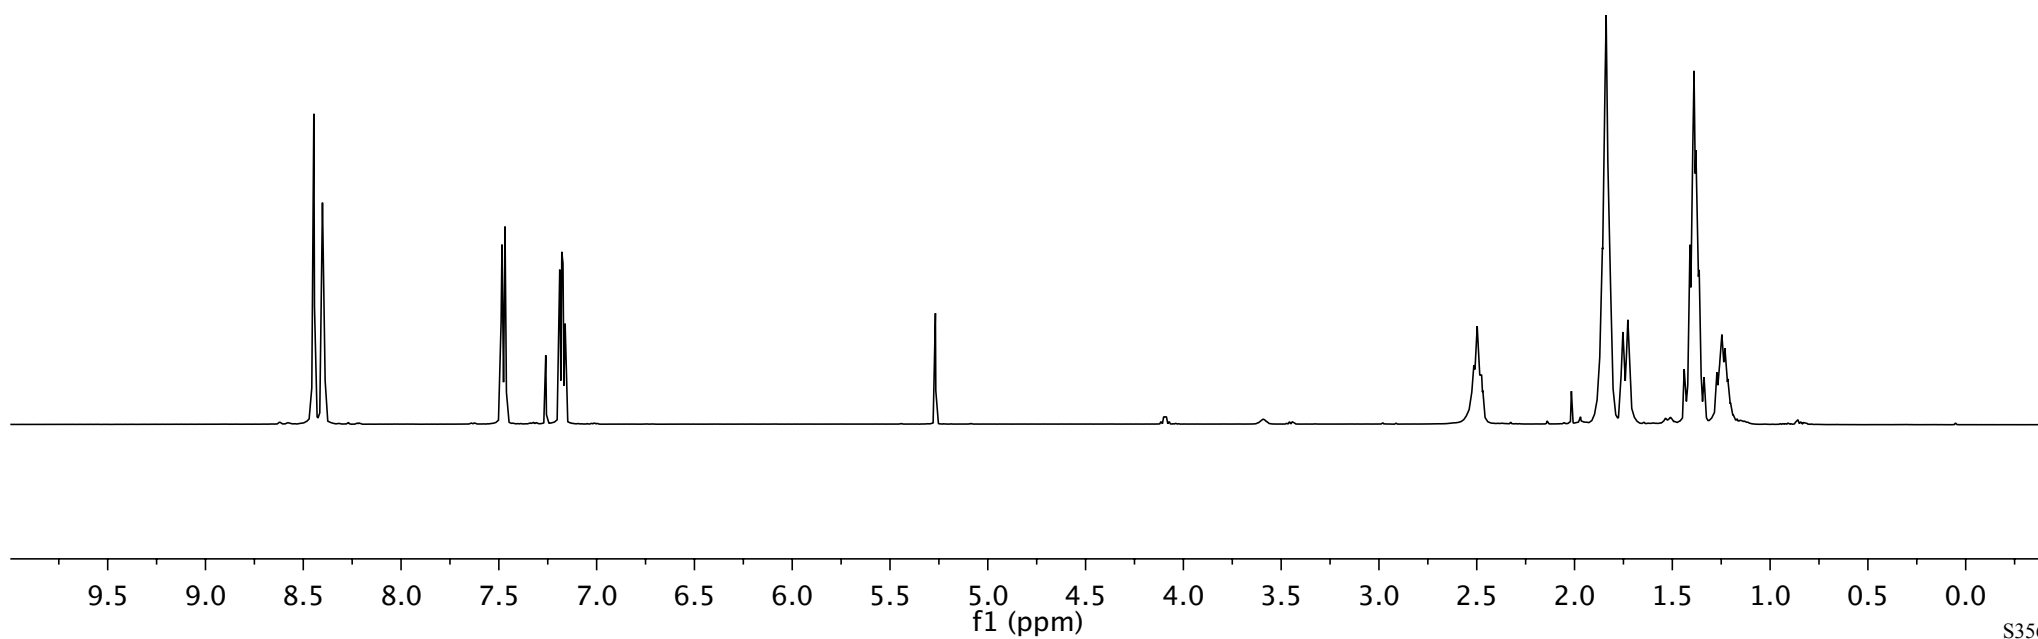

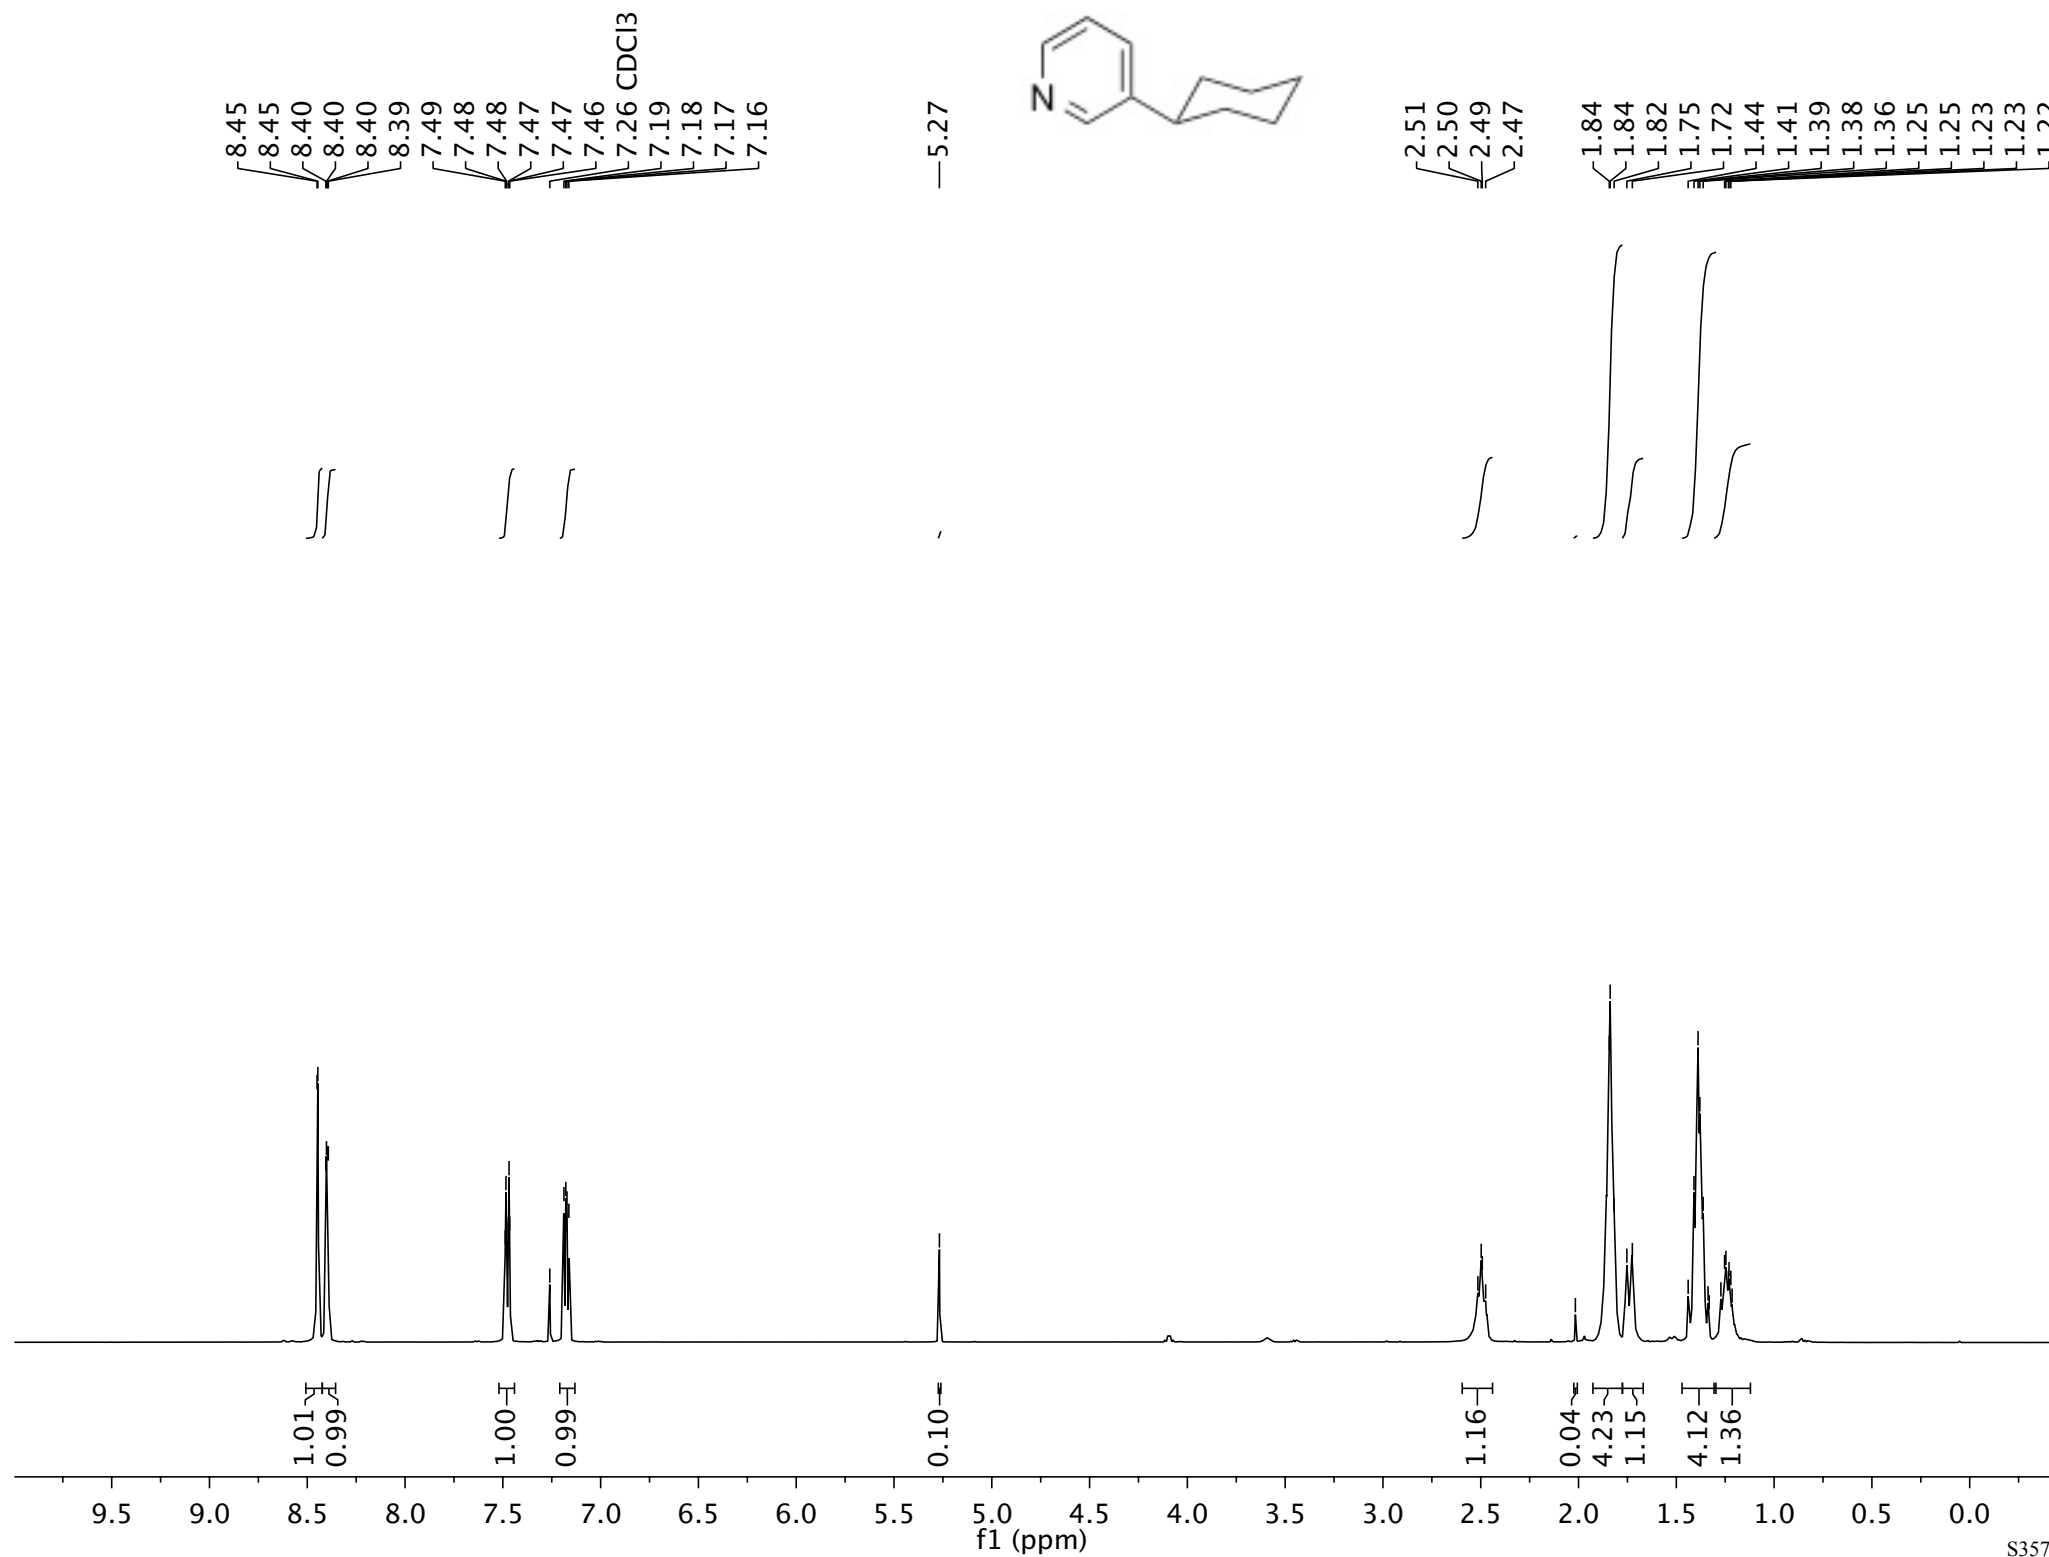

| Parameter              | Value   |
|------------------------|---------|
| Origin                 | Varian  |
| Spectrometer           | inova   |
| Solvent                | CDCl3   |
| Temperature            | 20.0    |
| Pulse Sequence         | s2pul   |
| Experiment             | 1D      |
| Probe                  | hcn     |
| Receiver Gain          | 22      |
| Relaxation Delay       | 10.0000 |
| Pulse Width            | 0.0000  |
| Acquisition Time       | 4.0960  |
| Spectrometer Frequency | 500.07  |
| Spectral Width         | 8000.0  |
| Lowest Frequency       | -1520.9 |
| Nucleus                | 1H      |
| Acquired Size          | 32768   |
| Spectral Size          | 65536   |

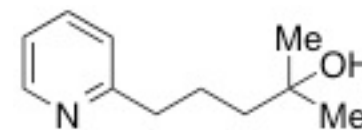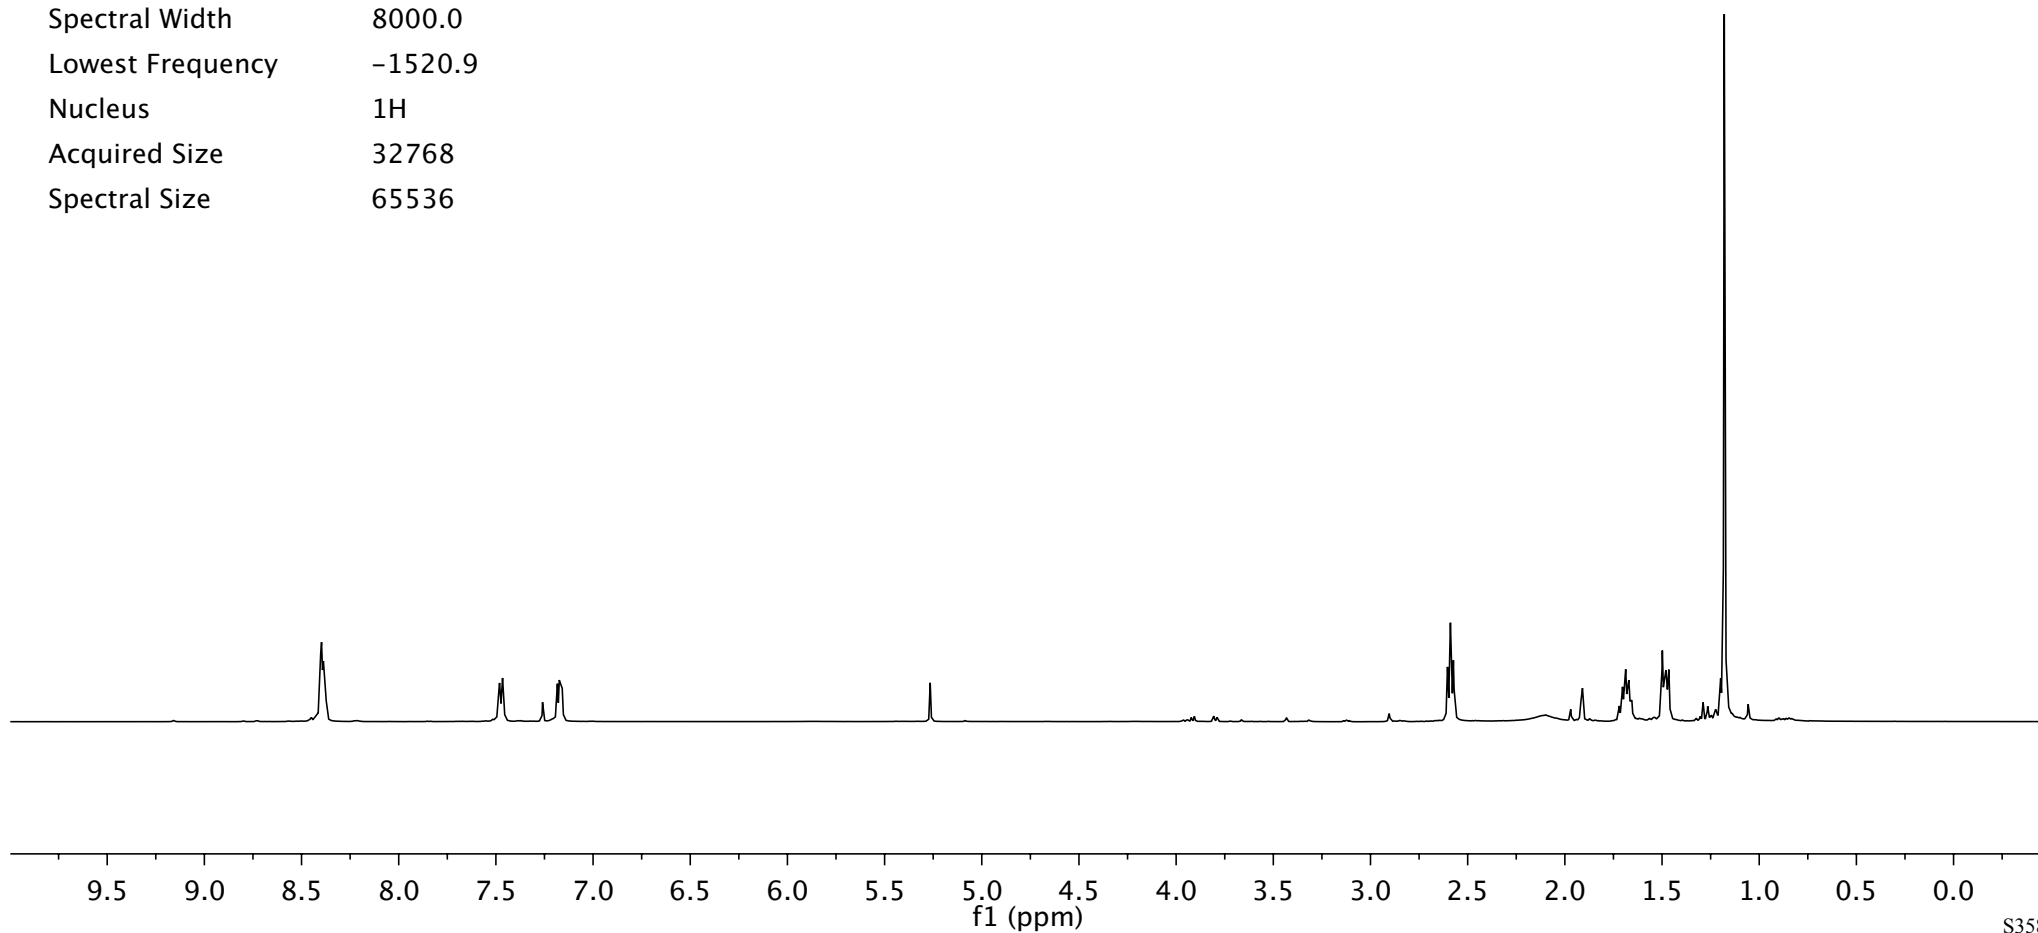

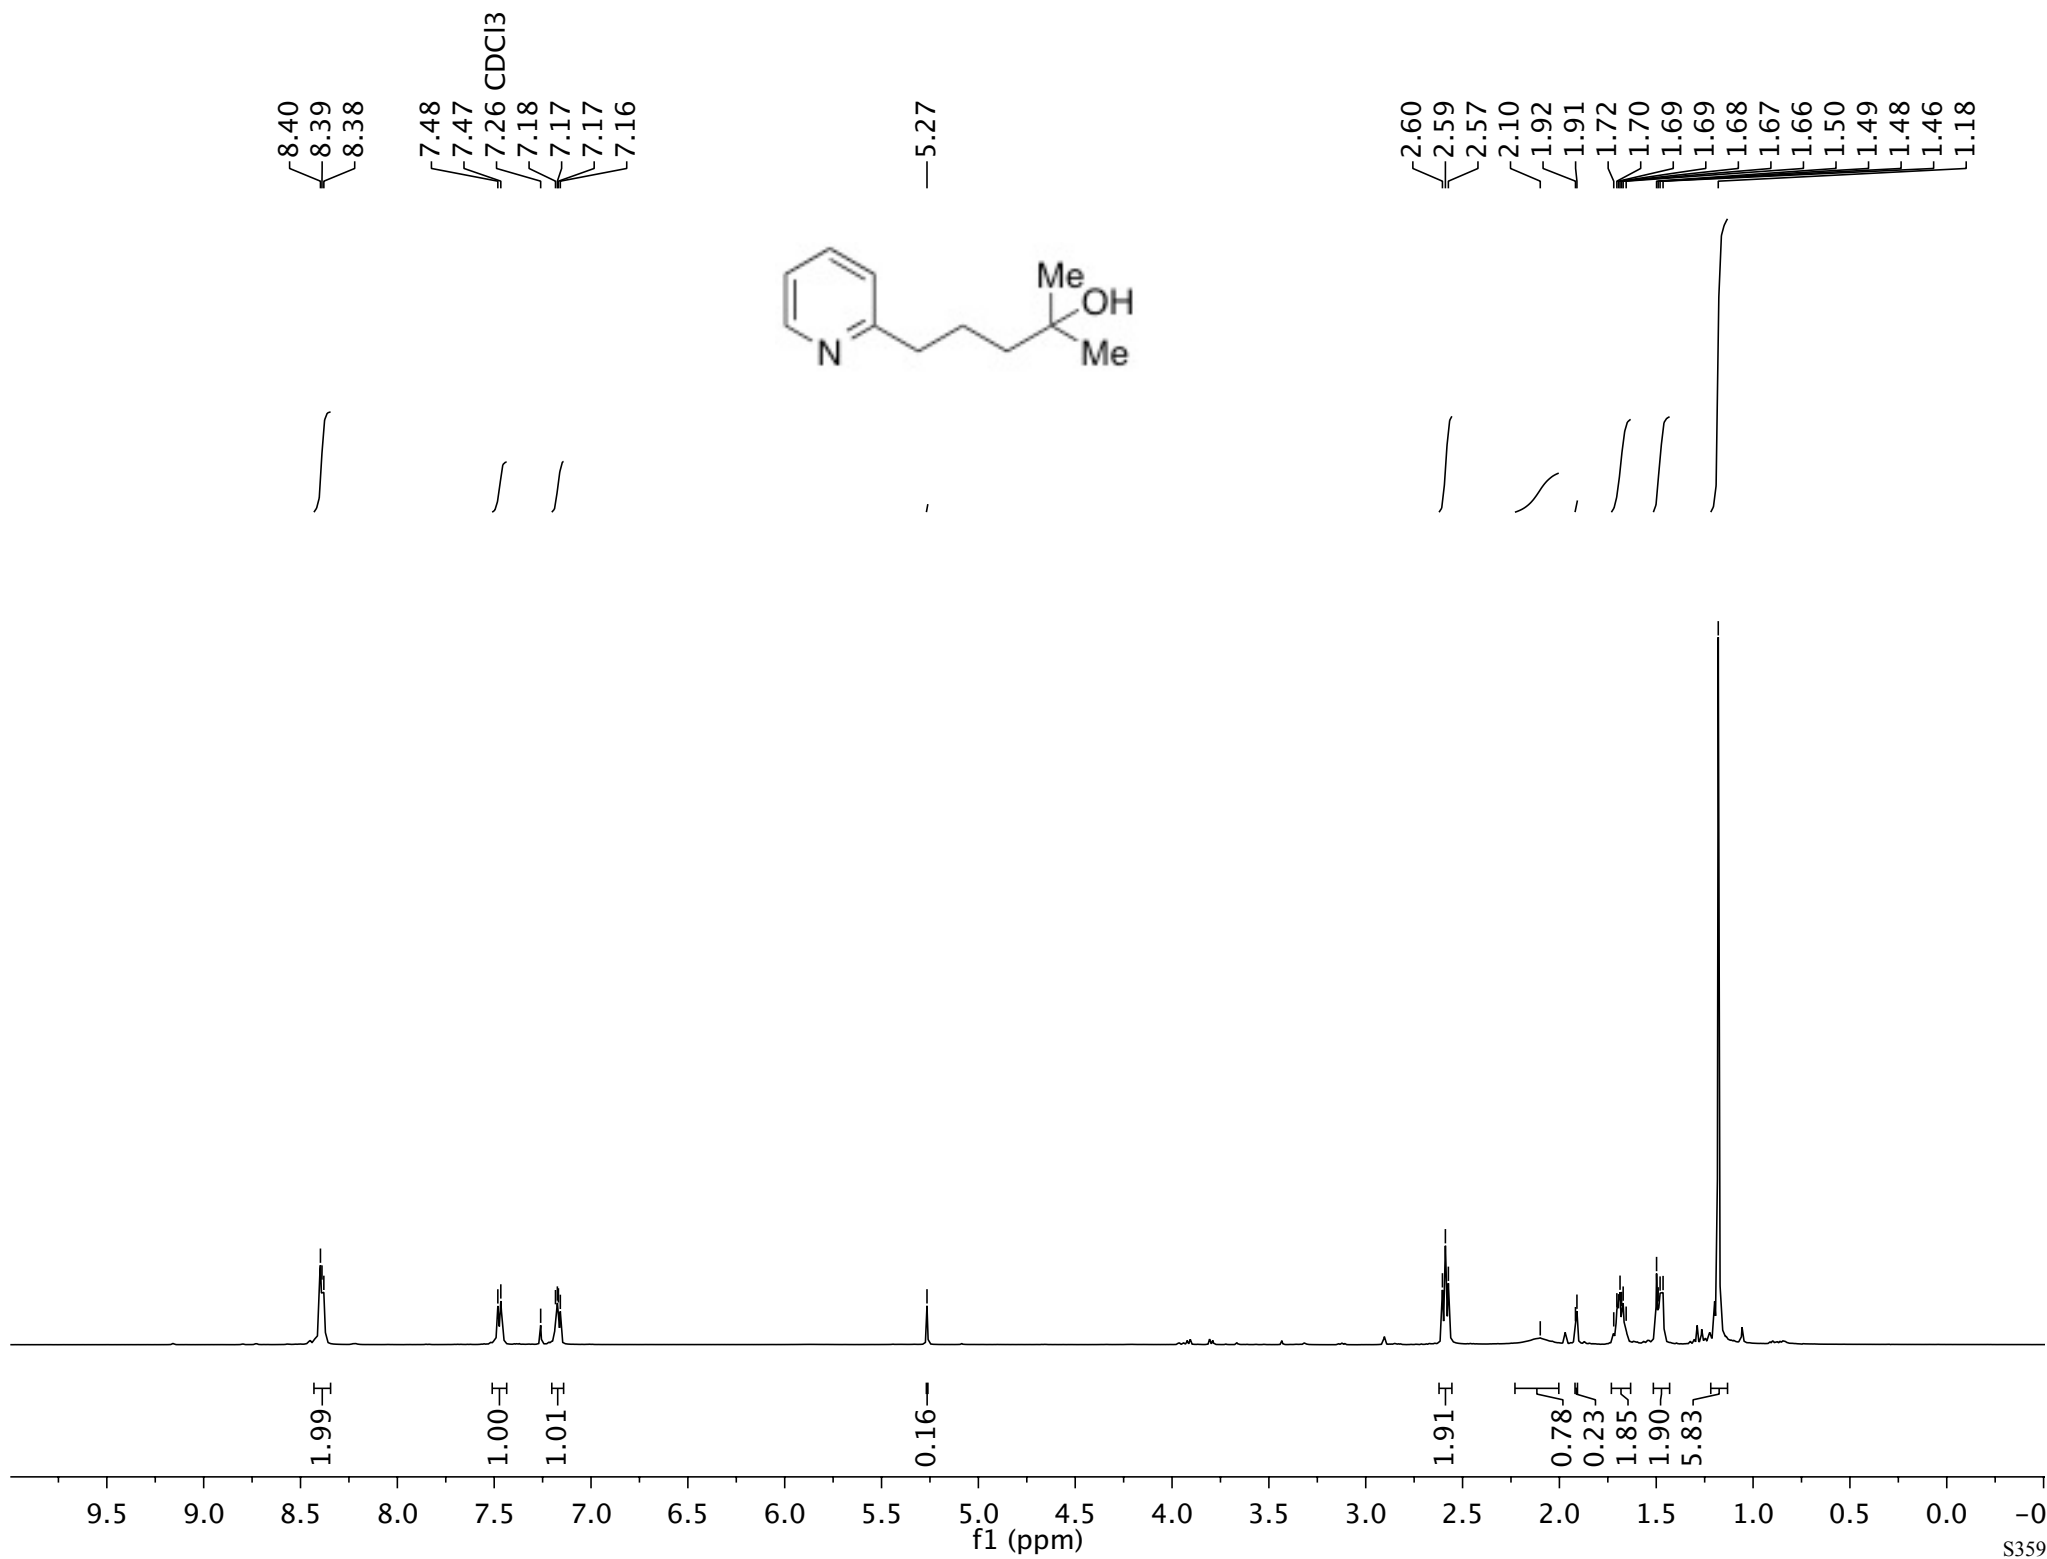



| Parameter              | Value   |
|------------------------|---------|
| Origin                 | Varian  |
| Spectrometer           | inova   |
| Solvent                | CDCl3   |
| Temperature            | 20.0    |
| Pulse Sequence         | s2pul   |
| Experiment             | 1D      |
| Probe                  | quad94  |
| Receiver Gain          | 60      |
| Relaxation Delay       | 1.0000  |
| Pulse Width            | 0.0000  |
| Acquisition Time       | 1.3107  |
| Spectrometer Frequency | 100.58  |
| Spectral Width         | 25000.0 |
| Lowest Frequency       | -1027.1 |
| Nucleus                | 13C     |
| Acquired Size          | 32768   |
| Spectral Size          | 65536   |

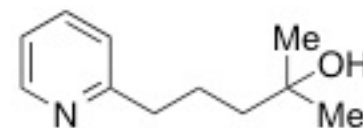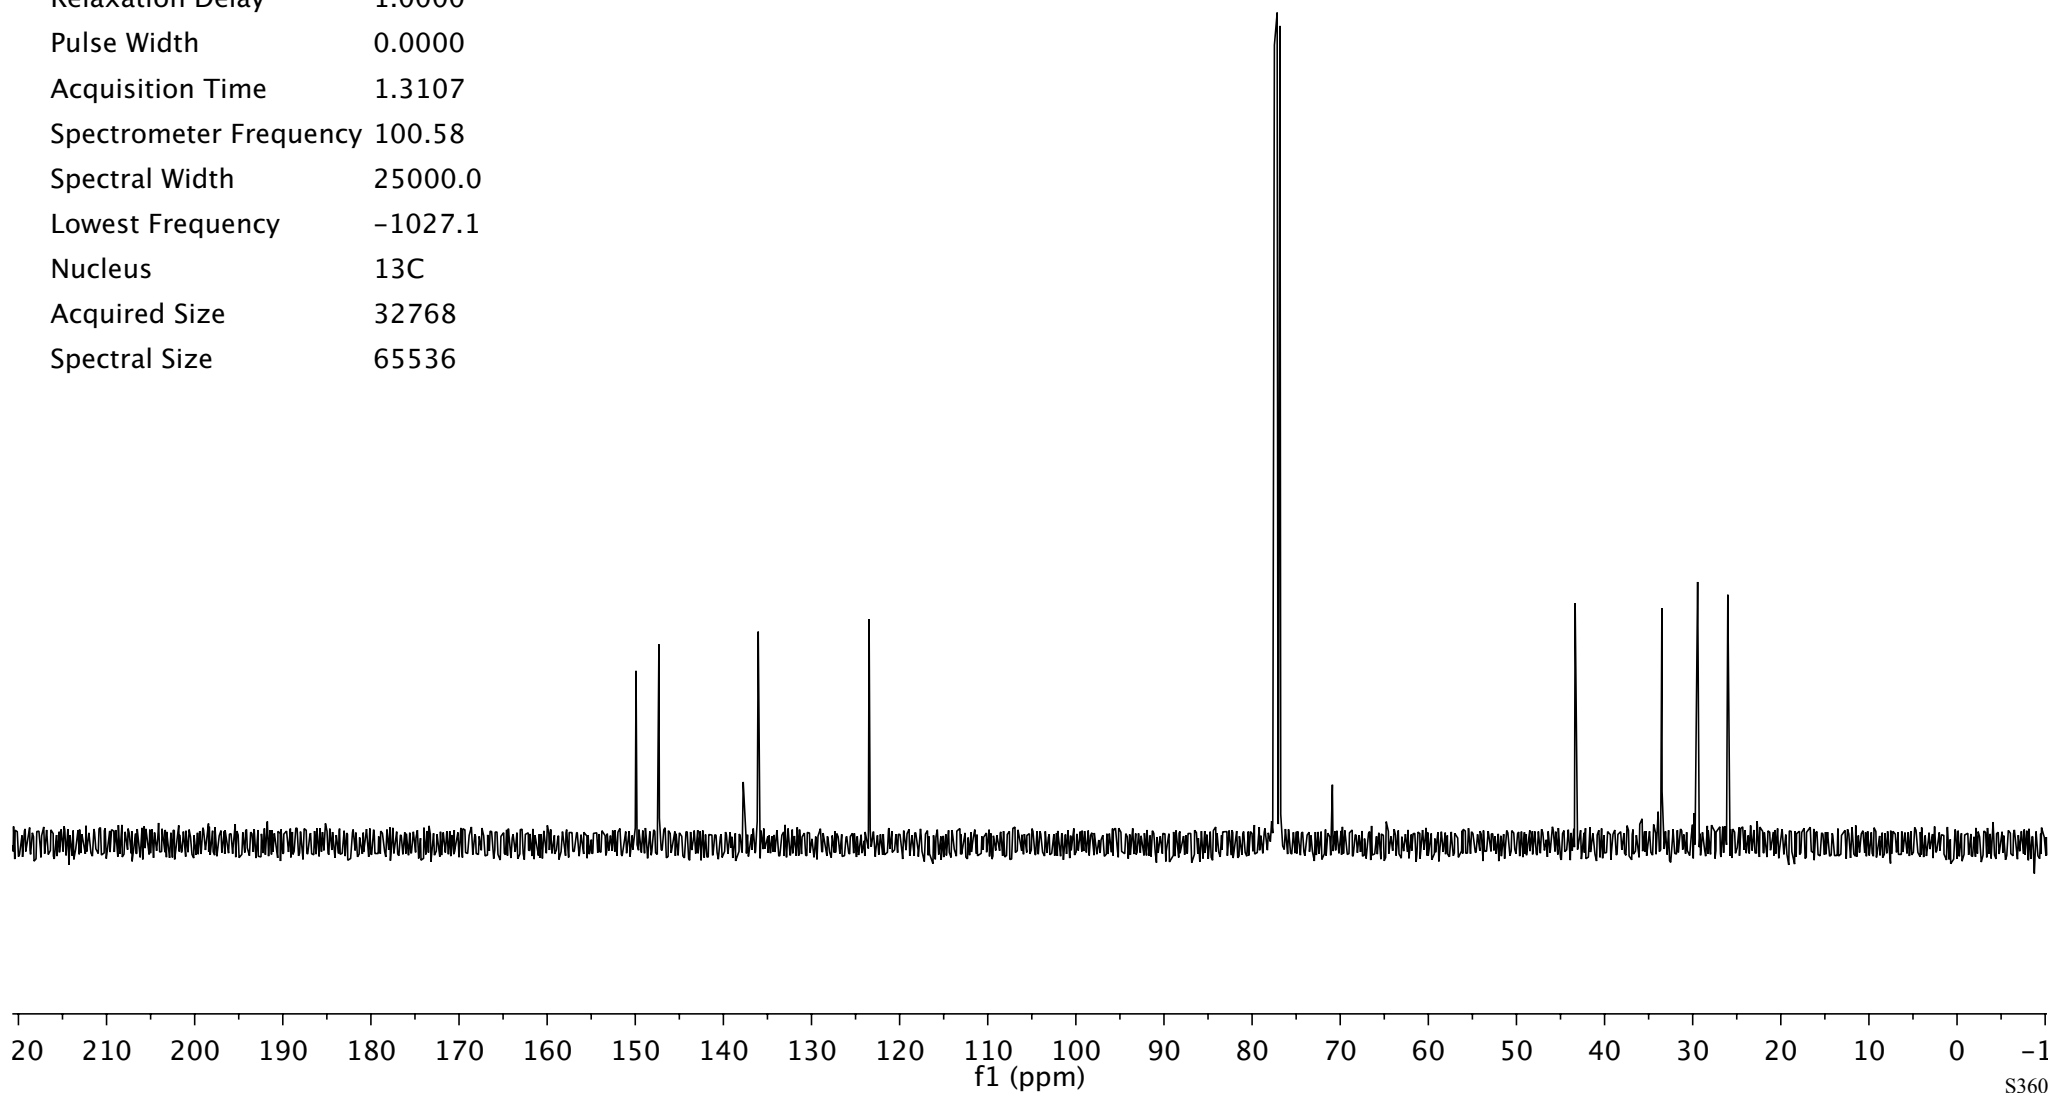

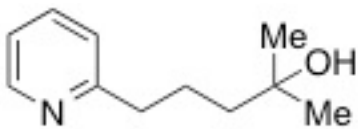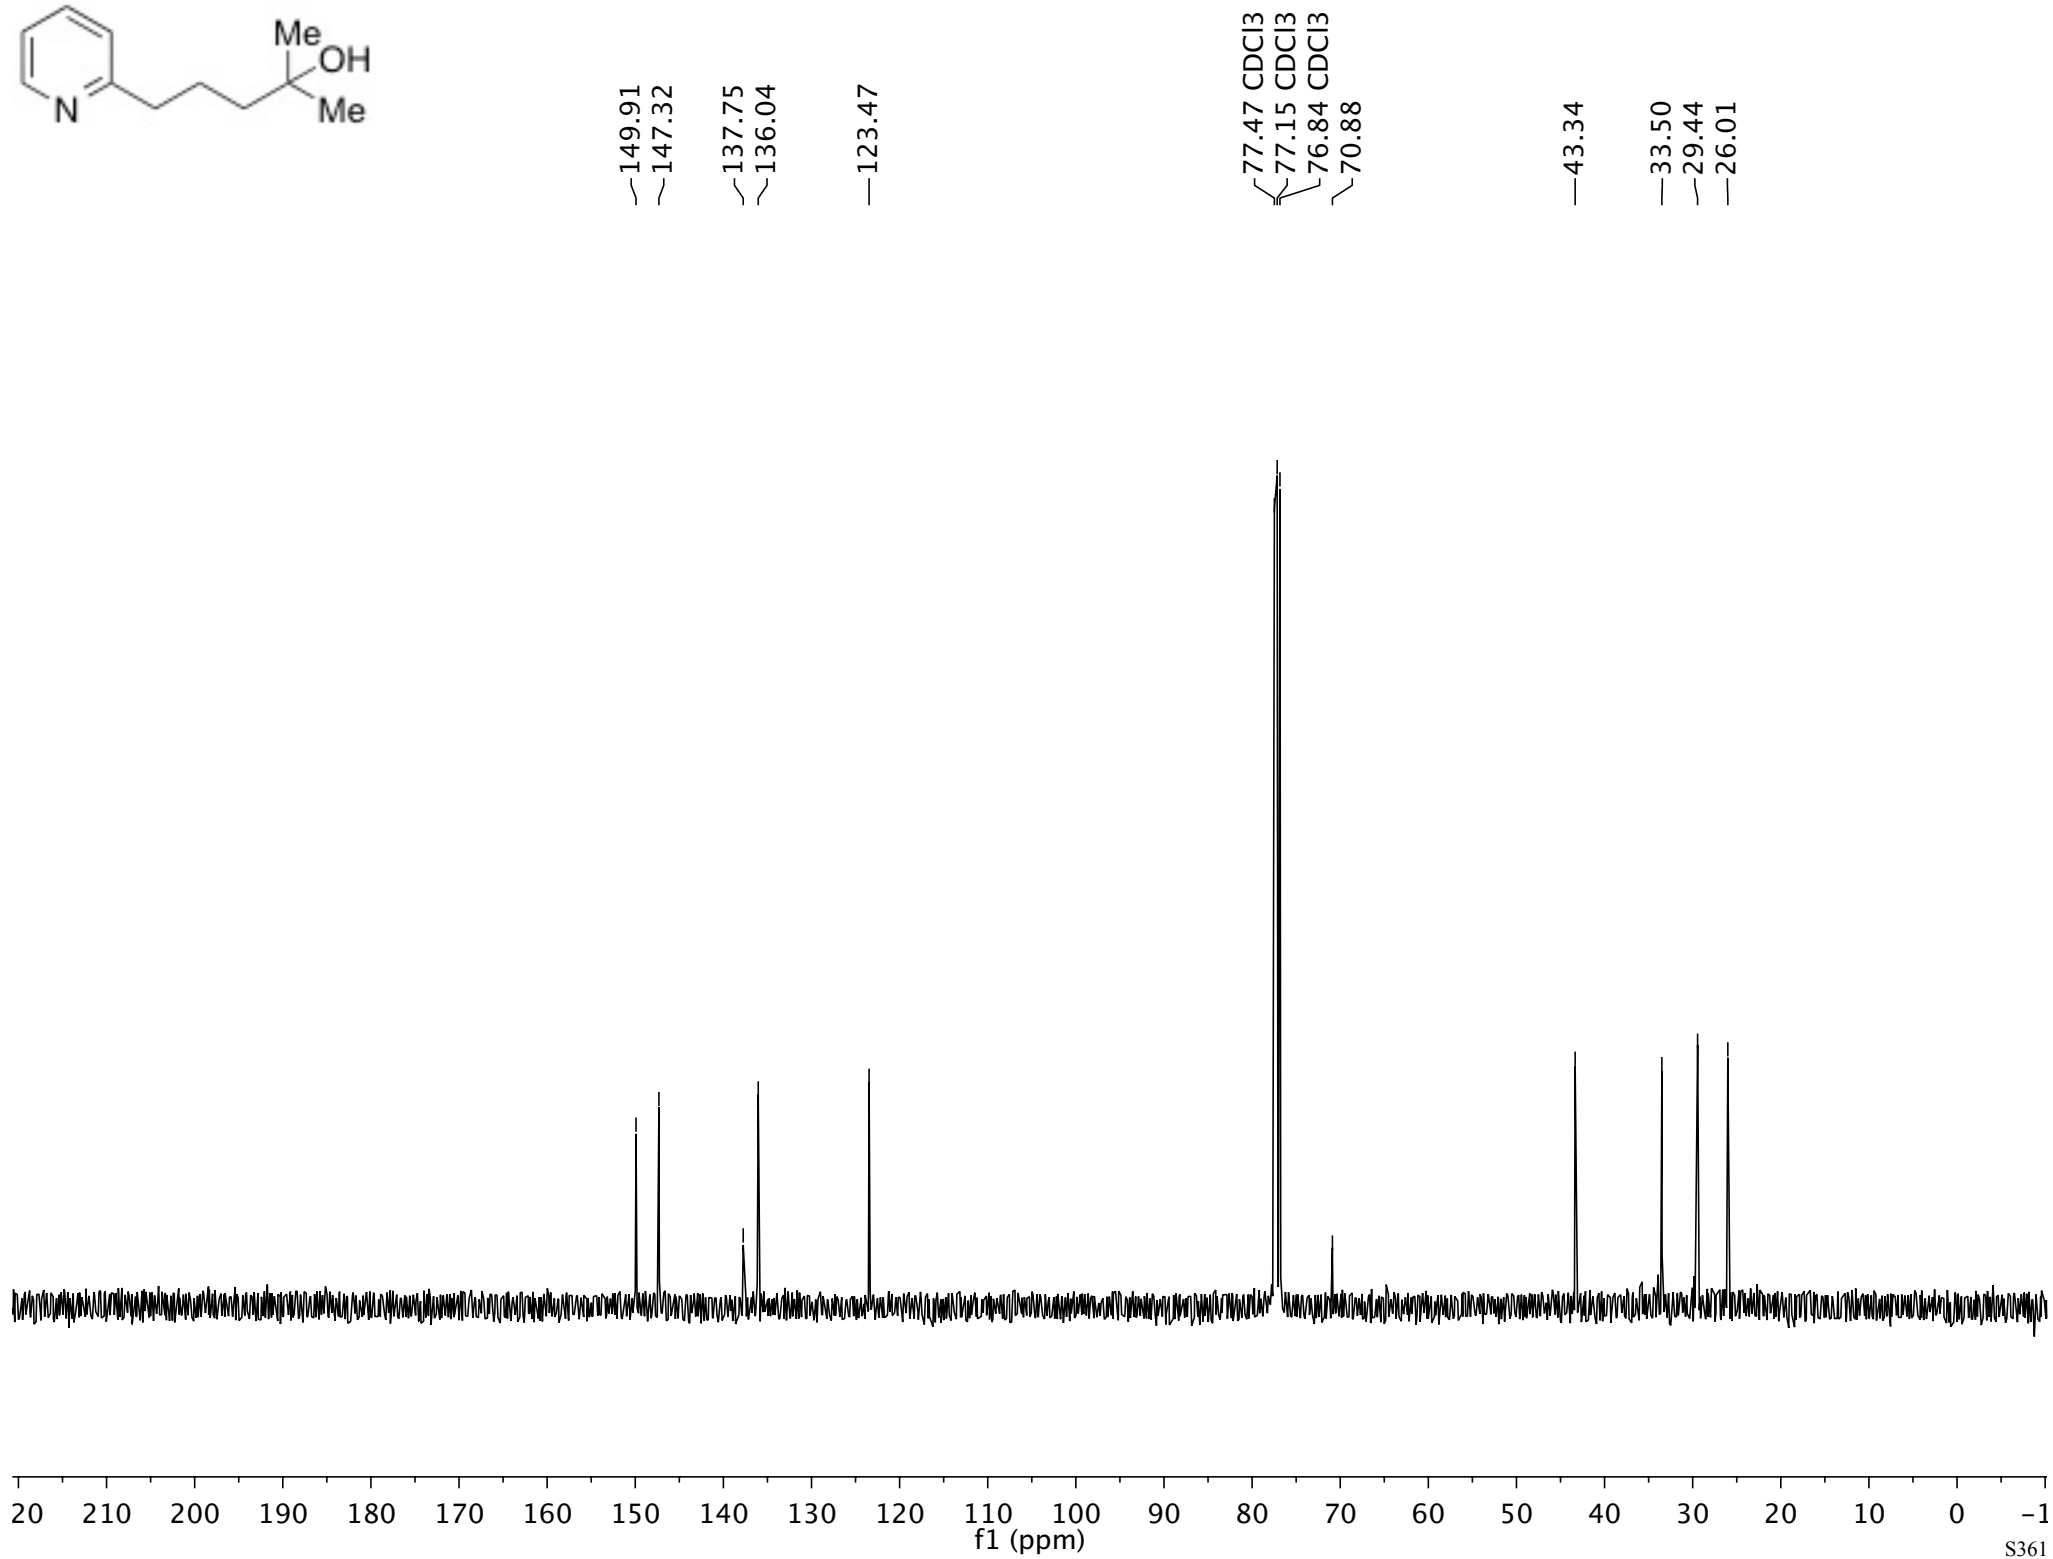

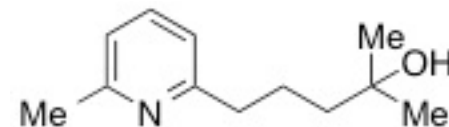

| Parameter              | Value   |
|------------------------|---------|
| Origin                 | Varian  |
| Spectrometer           | inova   |
| Solvent                | CDCl3   |
| Temperature            | 20.0    |
| Pulse Sequence         | s2pul   |
| Experiment             | 1D      |
| Probe                  | QUAD    |
| Receiver Gain          | 41      |
| Relaxation Delay       | 0.0000  |
| Pulse Width            | 0.0000  |
| Acquisition Time       | 4.6645  |
| Spectrometer Frequency | 499.69  |
| Spectral Width         | 7024.9  |
| Lowest Frequency       | -1021.6 |
| Nucleus                | 1H      |
| Acquired Size          | 32768   |
| Spectral Size          | 65536   |

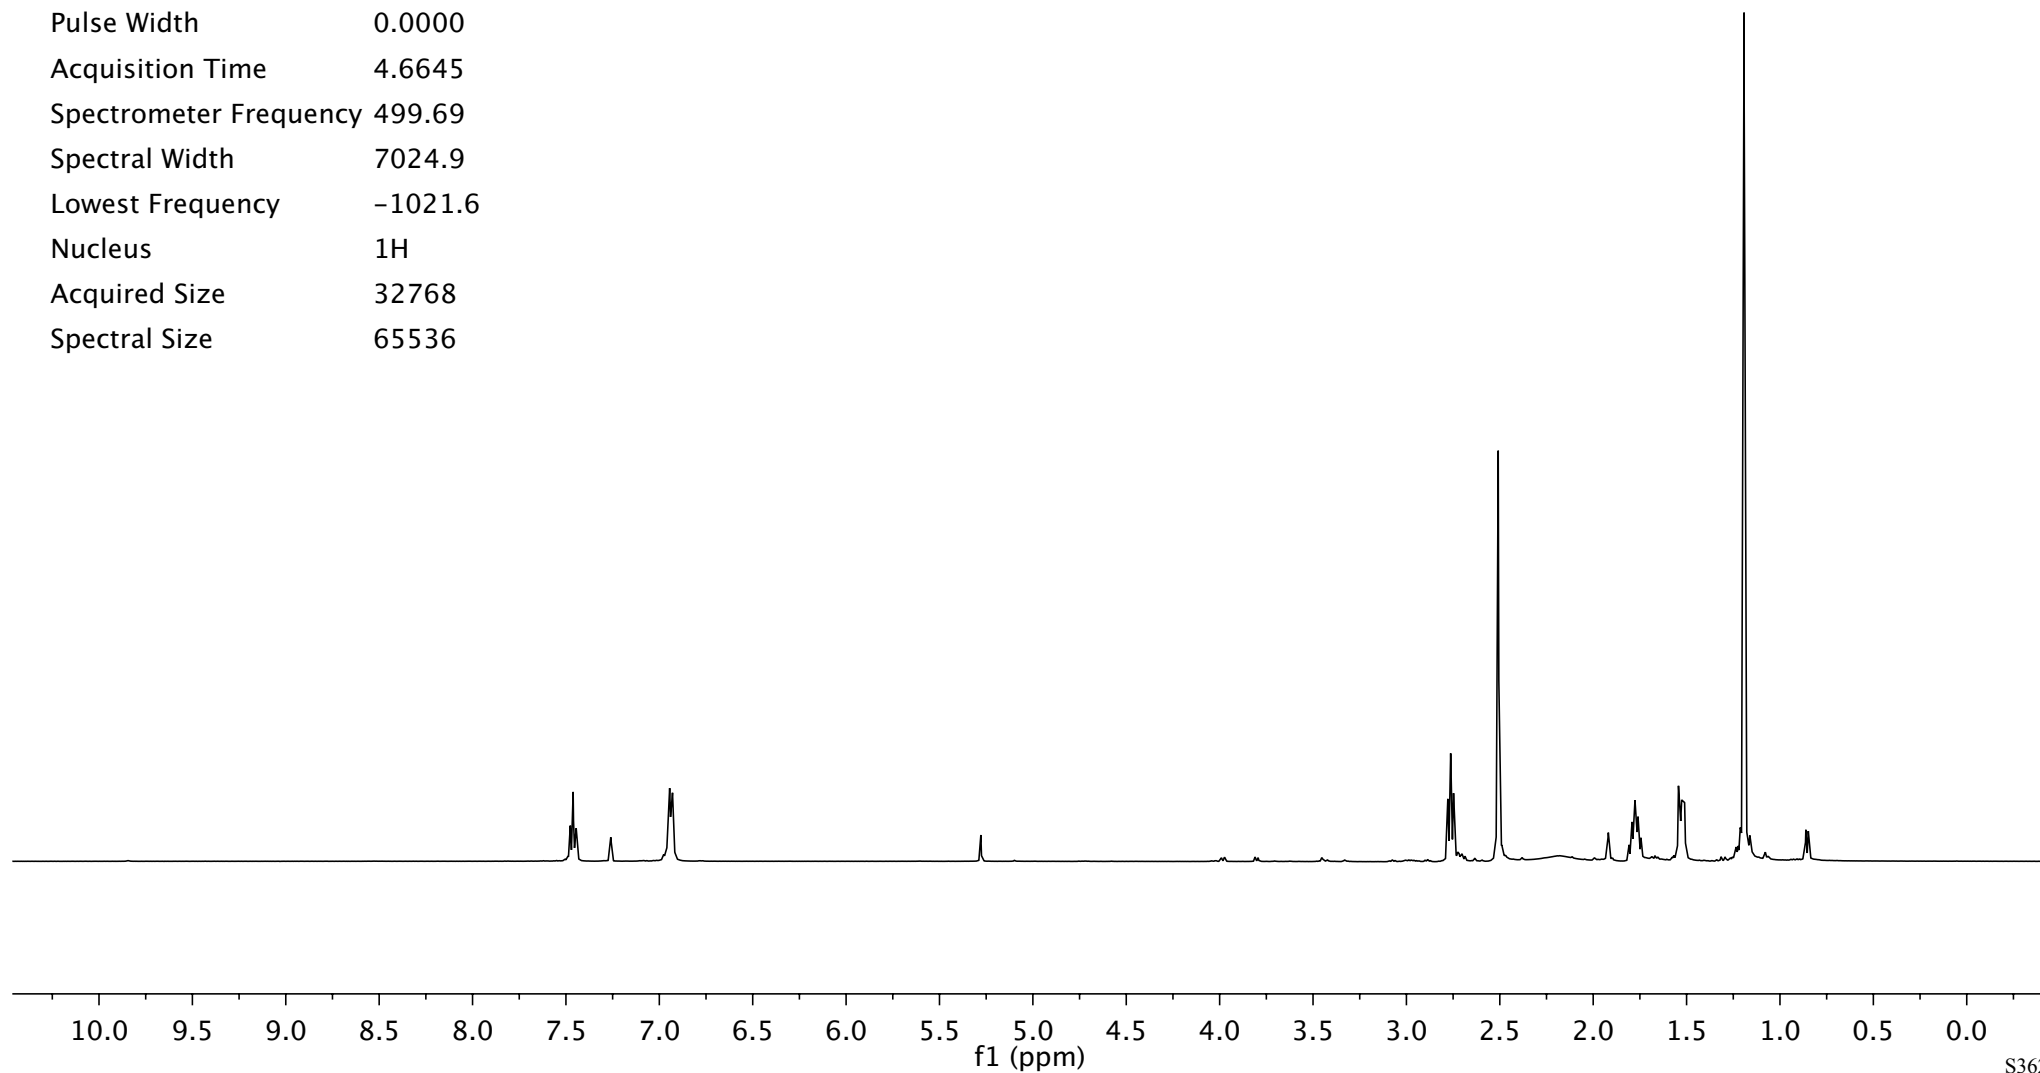

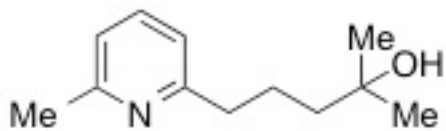

7.48  
7.46  
7.45  
7.26 CDCl<sub>3</sub>  
6.95  
6.94  
6.94  
6.93

5.28

2.78  
2.76  
2.75  
2.51  
2.19  
1.92  
1.81  
1.79  
1.78  
1.78  
1.77  
1.76  
1.74  
1.54  
1.53  
1.53  
1.51  
1.19  
0.86  
0.85

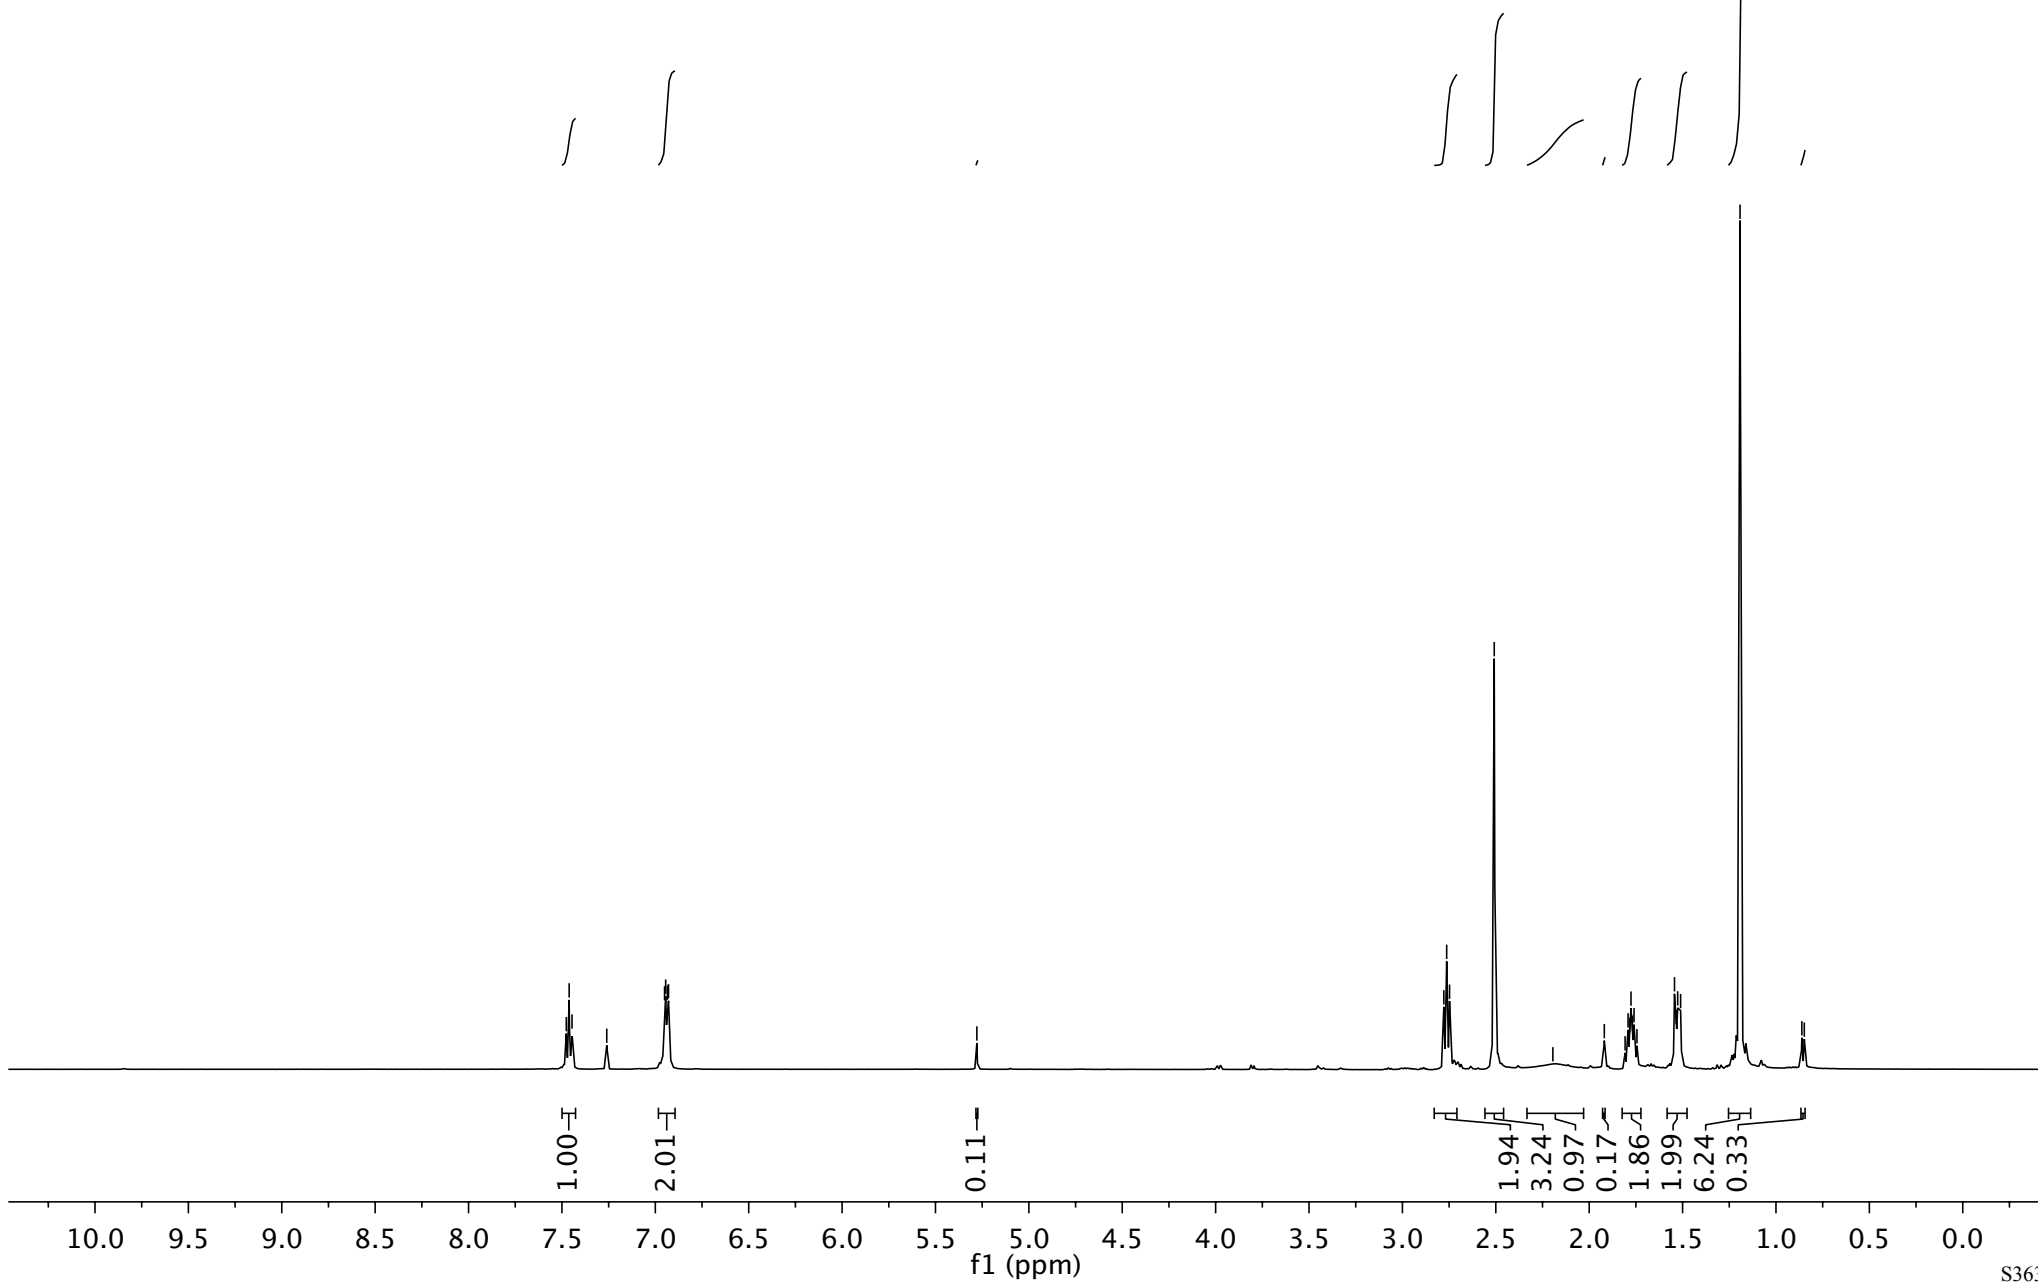

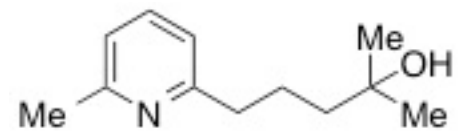

| Parameter              | Value   |
|------------------------|---------|
| Origin                 | Varian  |
| Spectrometer           | inova   |
| Solvent                | CDCl3   |
| Temperature            | 20.0    |
| Pulse Sequence         | s2pul   |
| Experiment             | 1D      |
| Probe                  | QUAD    |
| Receiver Gain          | 60      |
| Relaxation Delay       | 1.0000  |
| Pulse Width            | 0.0000  |
| Acquisition Time       | 1.0863  |
| Spectrometer Frequency | 125.66  |
| Spectral Width         | 30165.9 |
| Lowest Frequency       | -1276.7 |
| Nucleus                | 13C     |
| Acquired Size          | 32768   |
| Spectral Size          | 65536   |

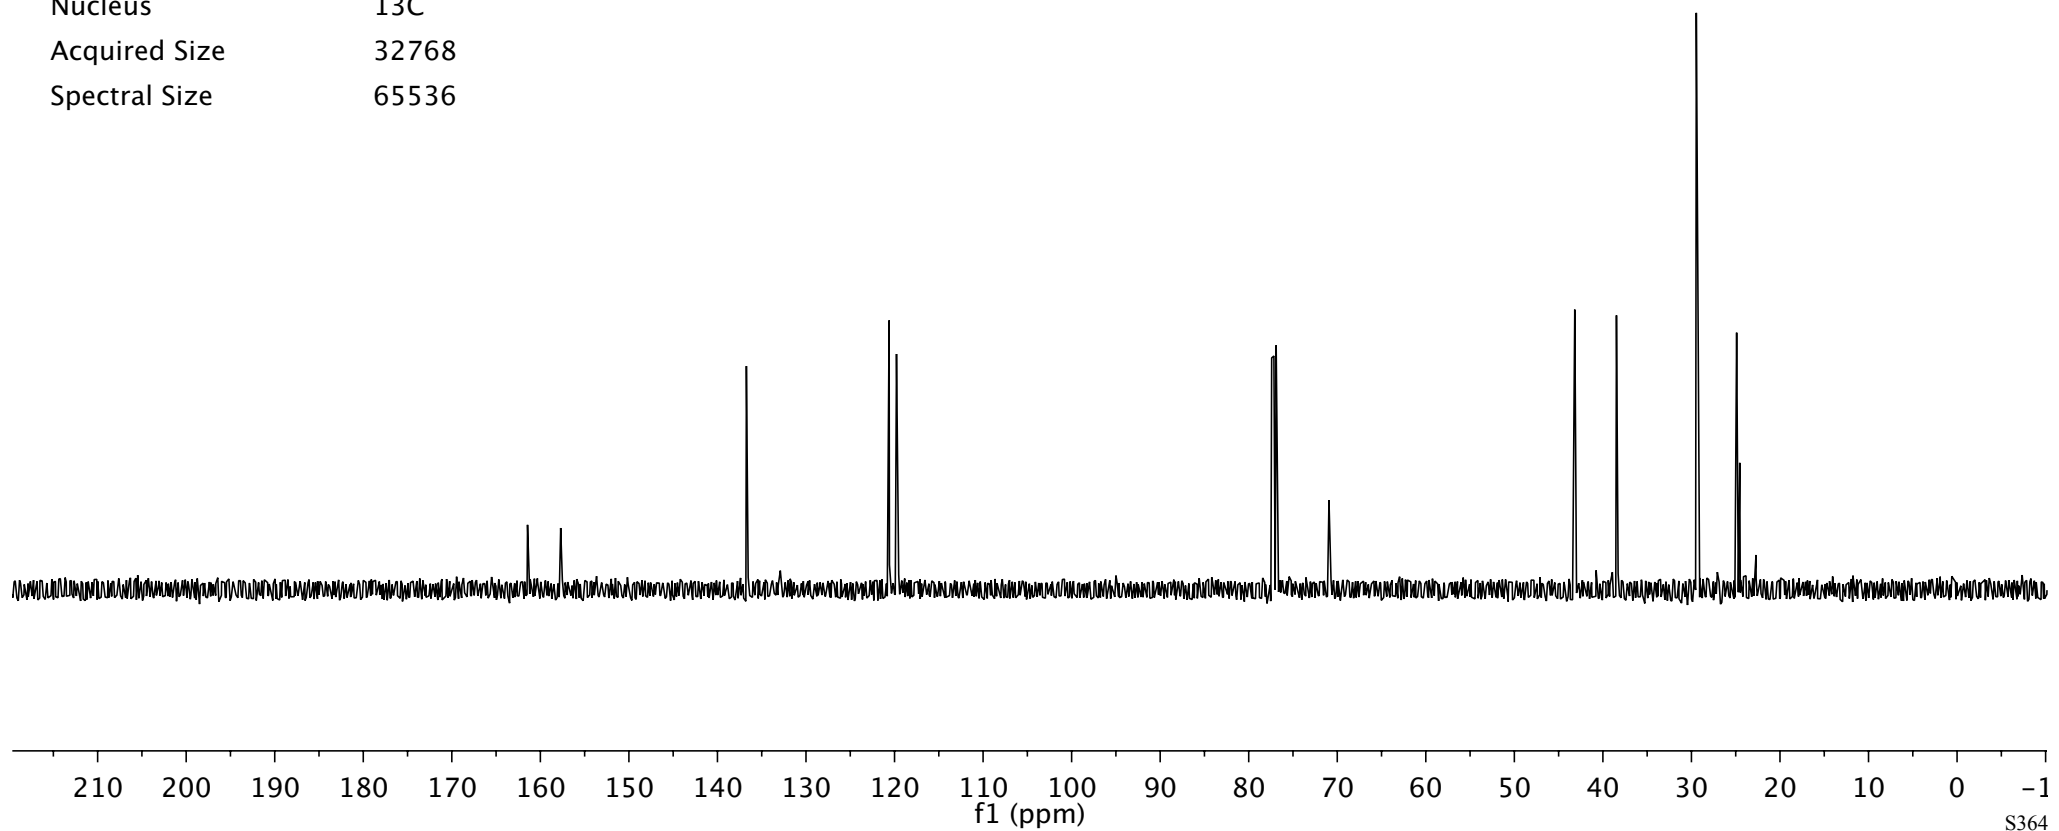

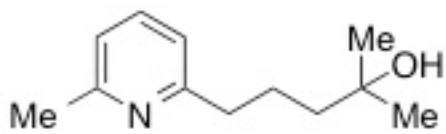

—161.45  
—157.70

—136.73

—120.61  
—119.78

77.41 CDCl<sub>3</sub>  
77.15 CDCl<sub>3</sub>  
76.90 CDCl<sub>3</sub>  
70.94

—43.17  
—38.47

—29.45  
—24.90  
—24.54

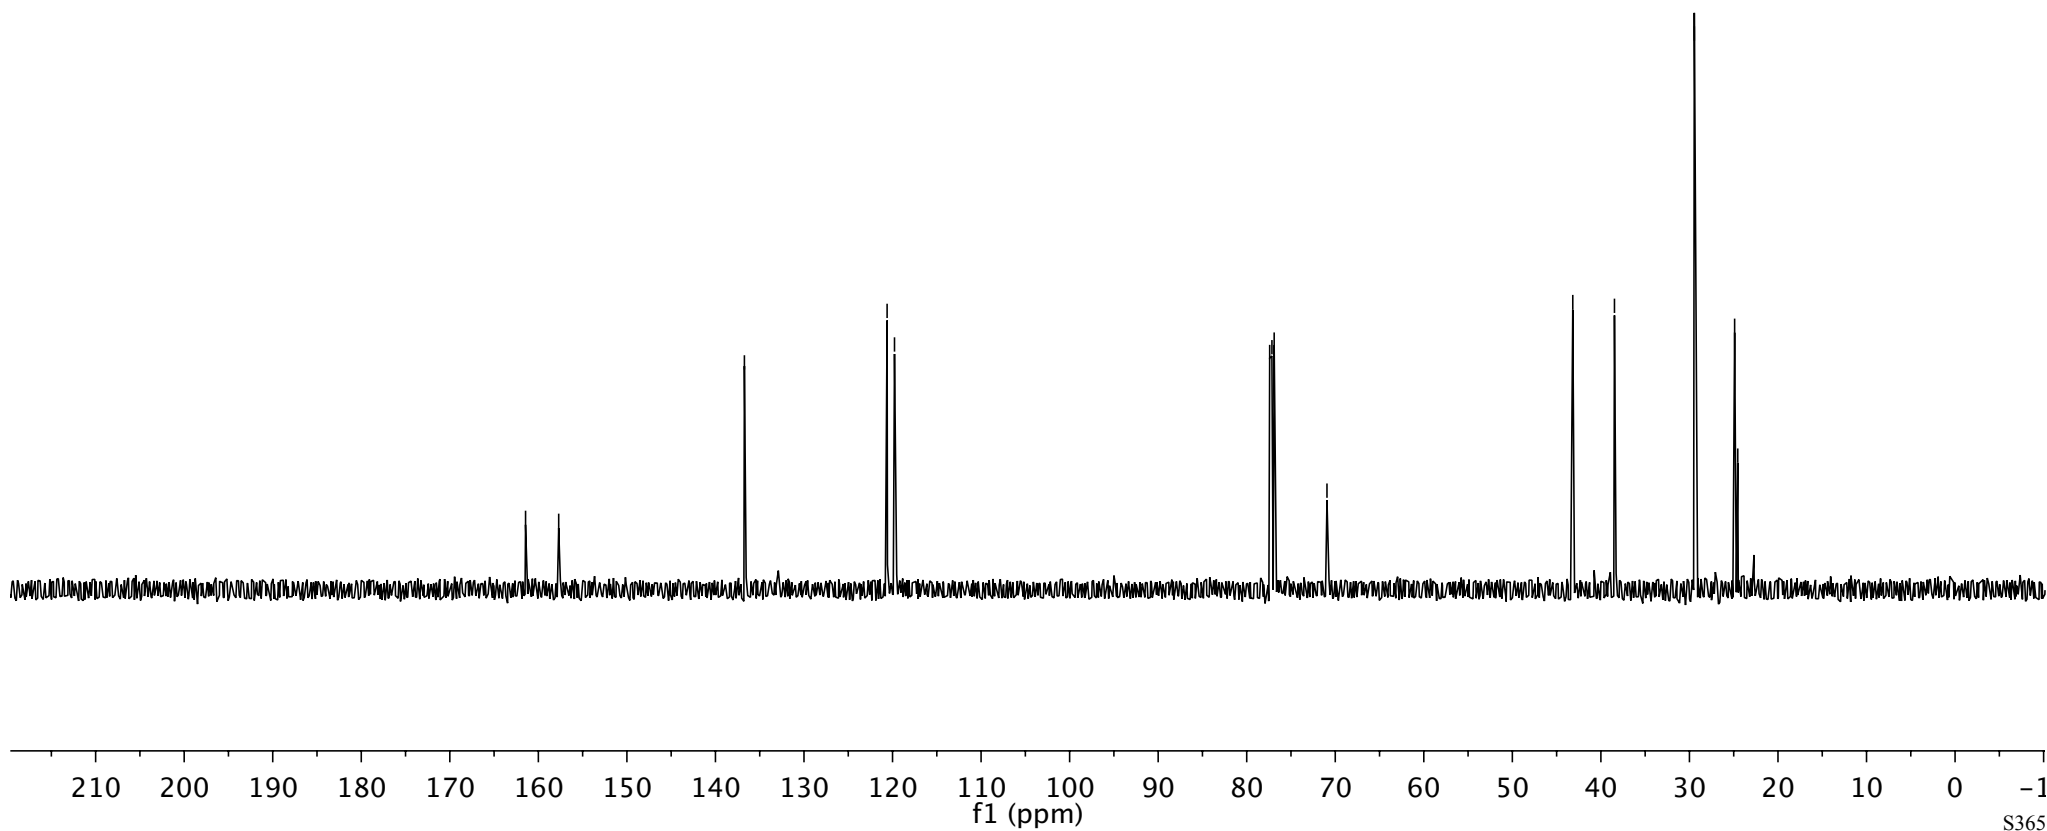

| Parameter              | Value   |
|------------------------|---------|
| Origin                 | Varian  |
| Spectrometer           | inova   |
| Solvent                | CDCl3   |
| Temperature            | 20.0    |
| Pulse Sequence         | s2pul   |
| Experiment             | 1D      |
| Probe                  | hcn     |
| Receiver Gain          | 22      |
| Relaxation Delay       | 10.0000 |
| Pulse Width            | 0.0000  |
| Acquisition Time       | 4.0960  |
| Spectrometer Frequency | 500.07  |
| Spectral Width         | 8000.0  |
| Lowest Frequency       | -1520.9 |
| Nucleus                | 1H      |
| Acquired Size          | 32768   |
| Spectral Size          | 65536   |

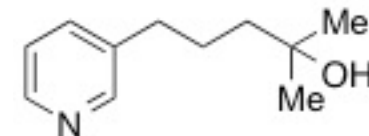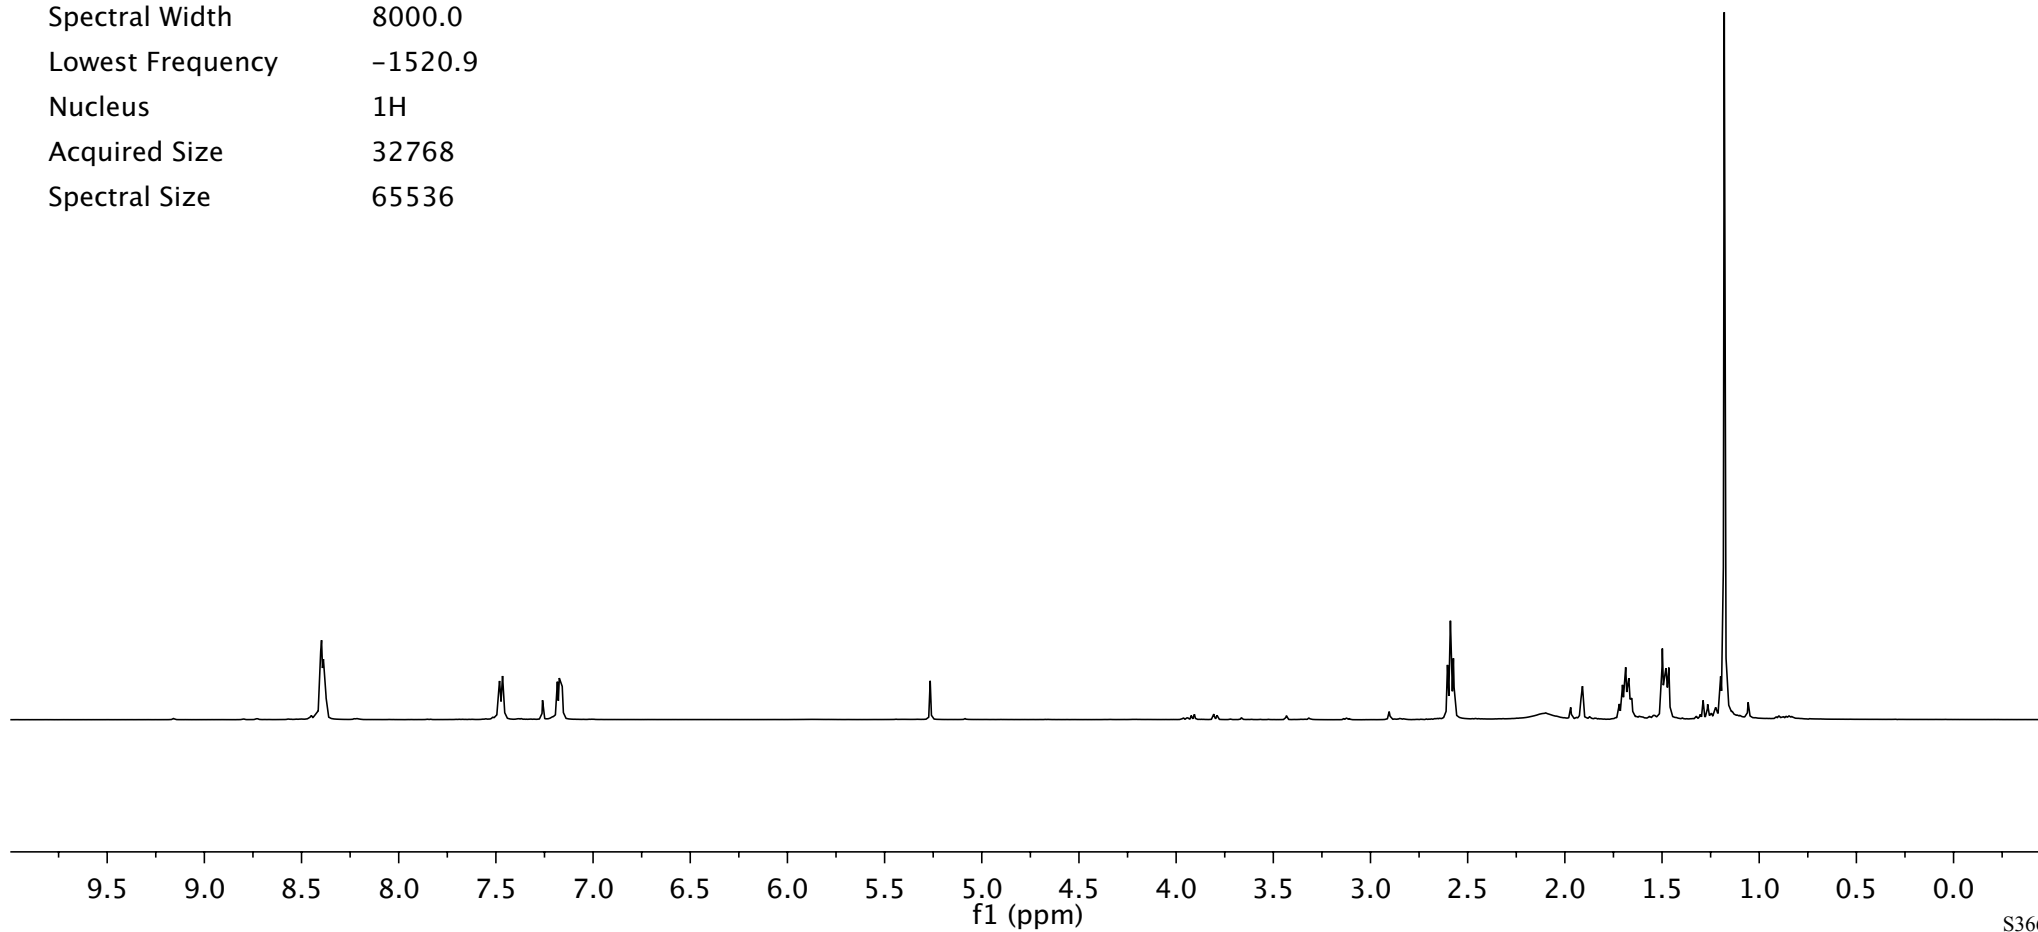

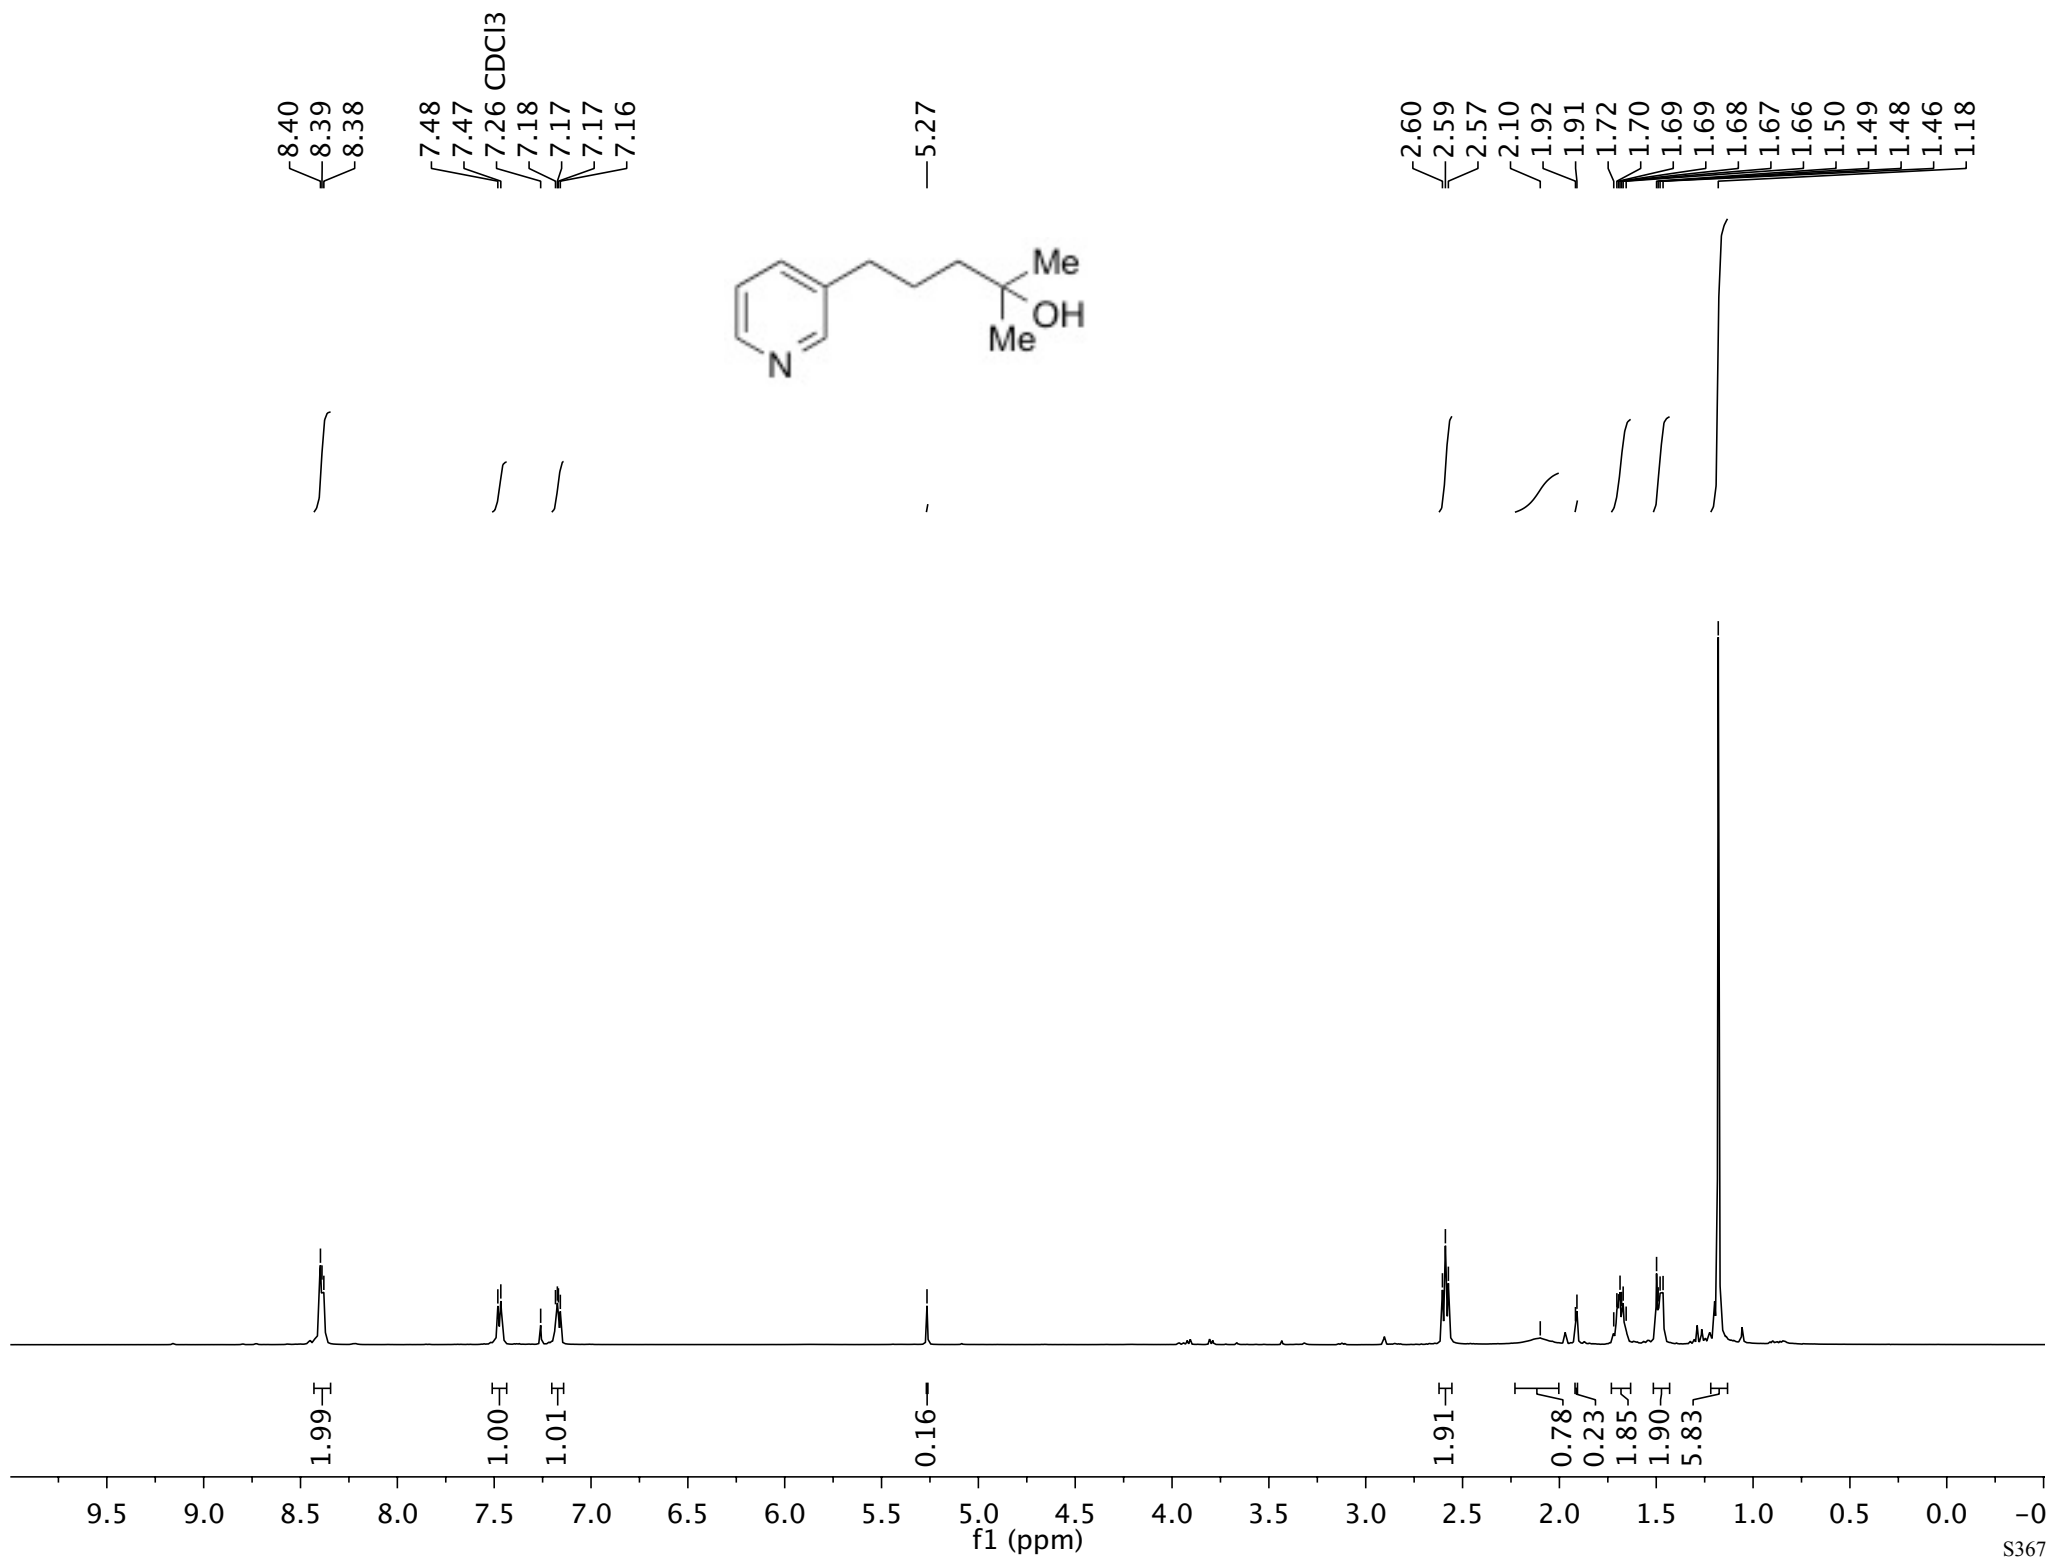



| Parameter              | Value           |
|------------------------|-----------------|
| Origin                 | Varian          |
| Spectrometer           | inova           |
| Solvent                | CDCl3           |
| Temperature            | 20.0            |
| Pulse Sequence         | s2pul           |
| Experiment             | 1D              |
| Probe                  | quad94          |
| Receiver Gain          | 60              |
| Relaxation Delay       | 1.0000          |
| Pulse Width            | 0.0000          |
| Acquisition Time       | 1.3107          |
| Spectrometer Frequency | 100.58          |
| Spectral Width         | 25000.0         |
| Lowest Frequency       | -1027.1         |
| Nucleus                | <sup>13</sup> C |
| Acquired Size          | 32768           |
| Spectral Size          | 65536           |

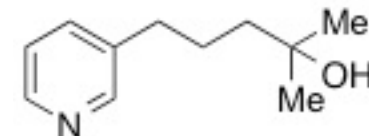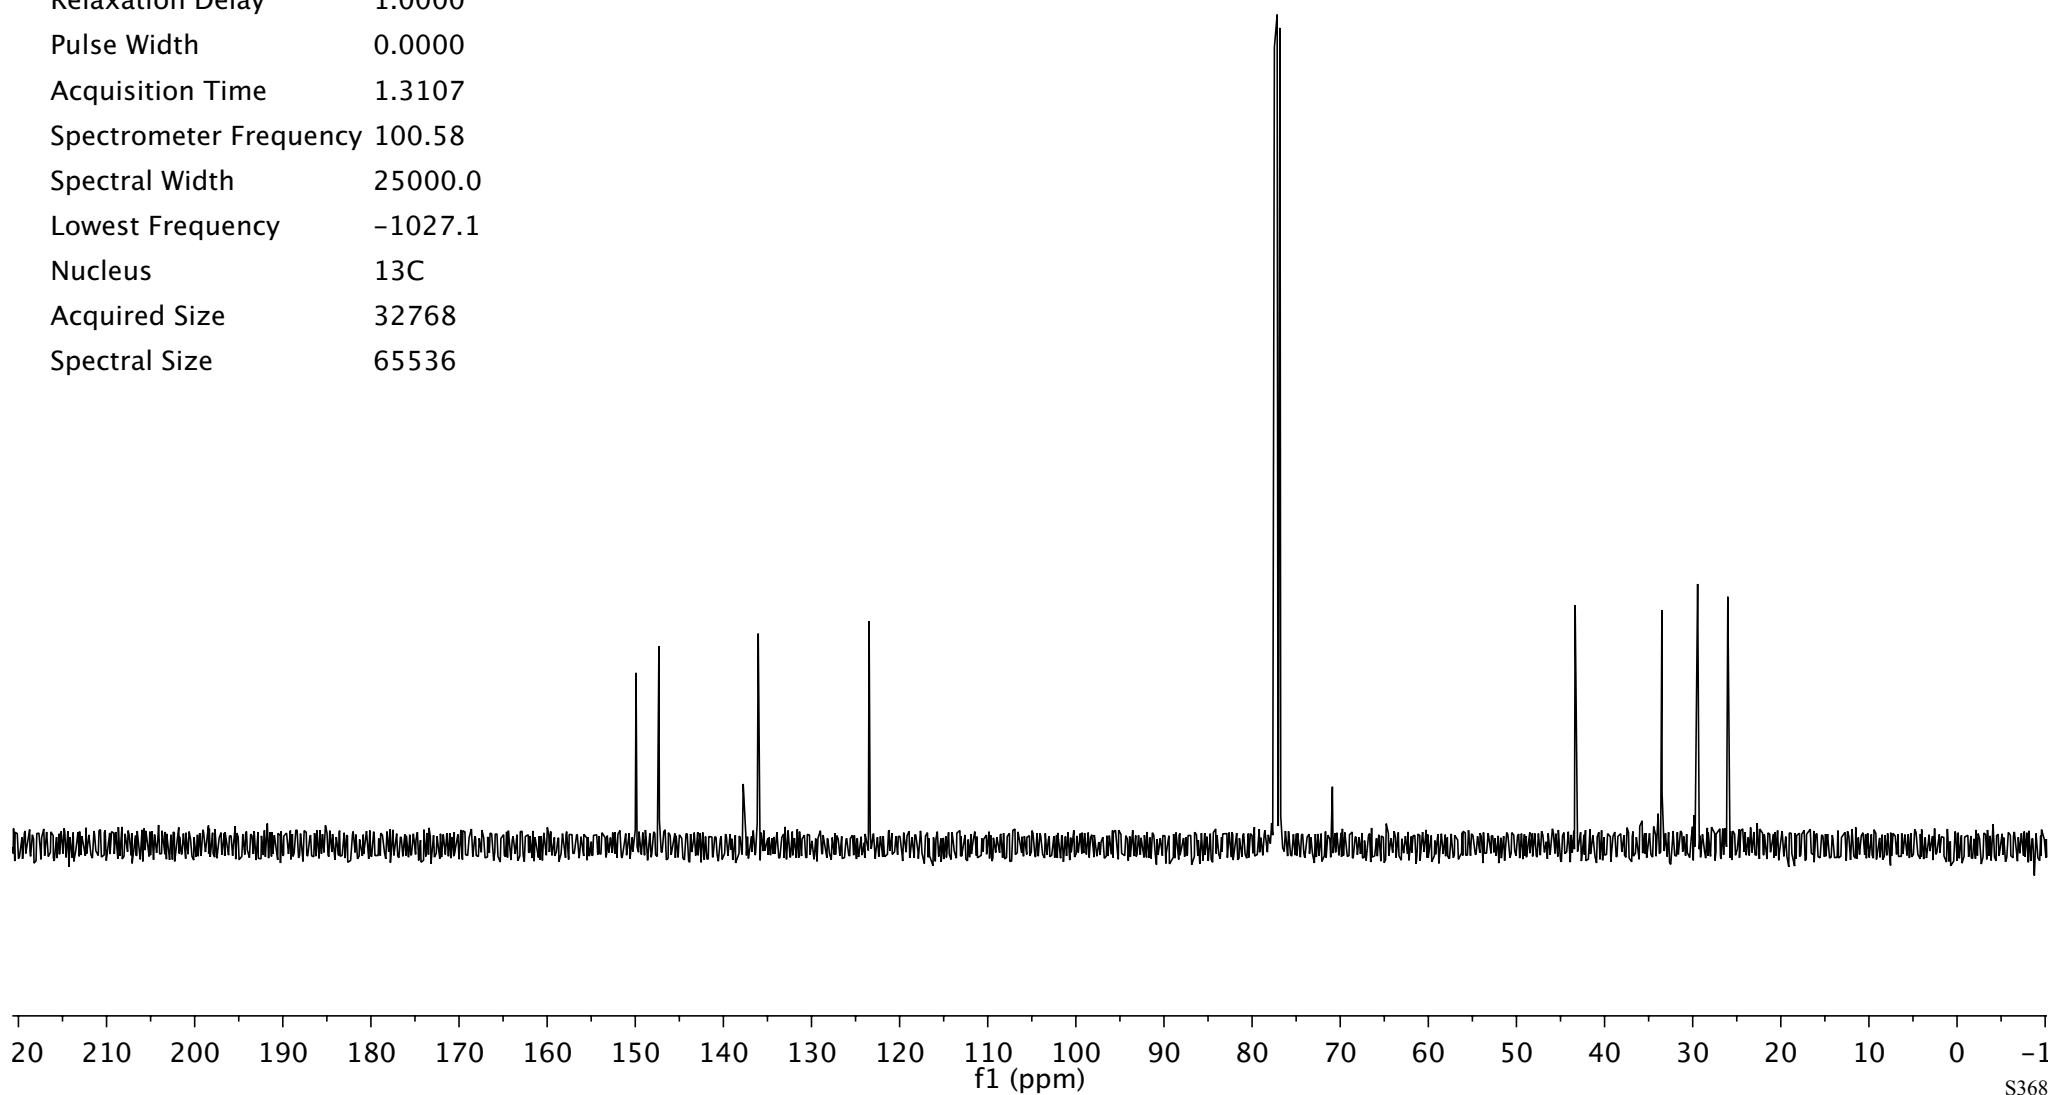

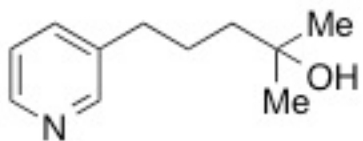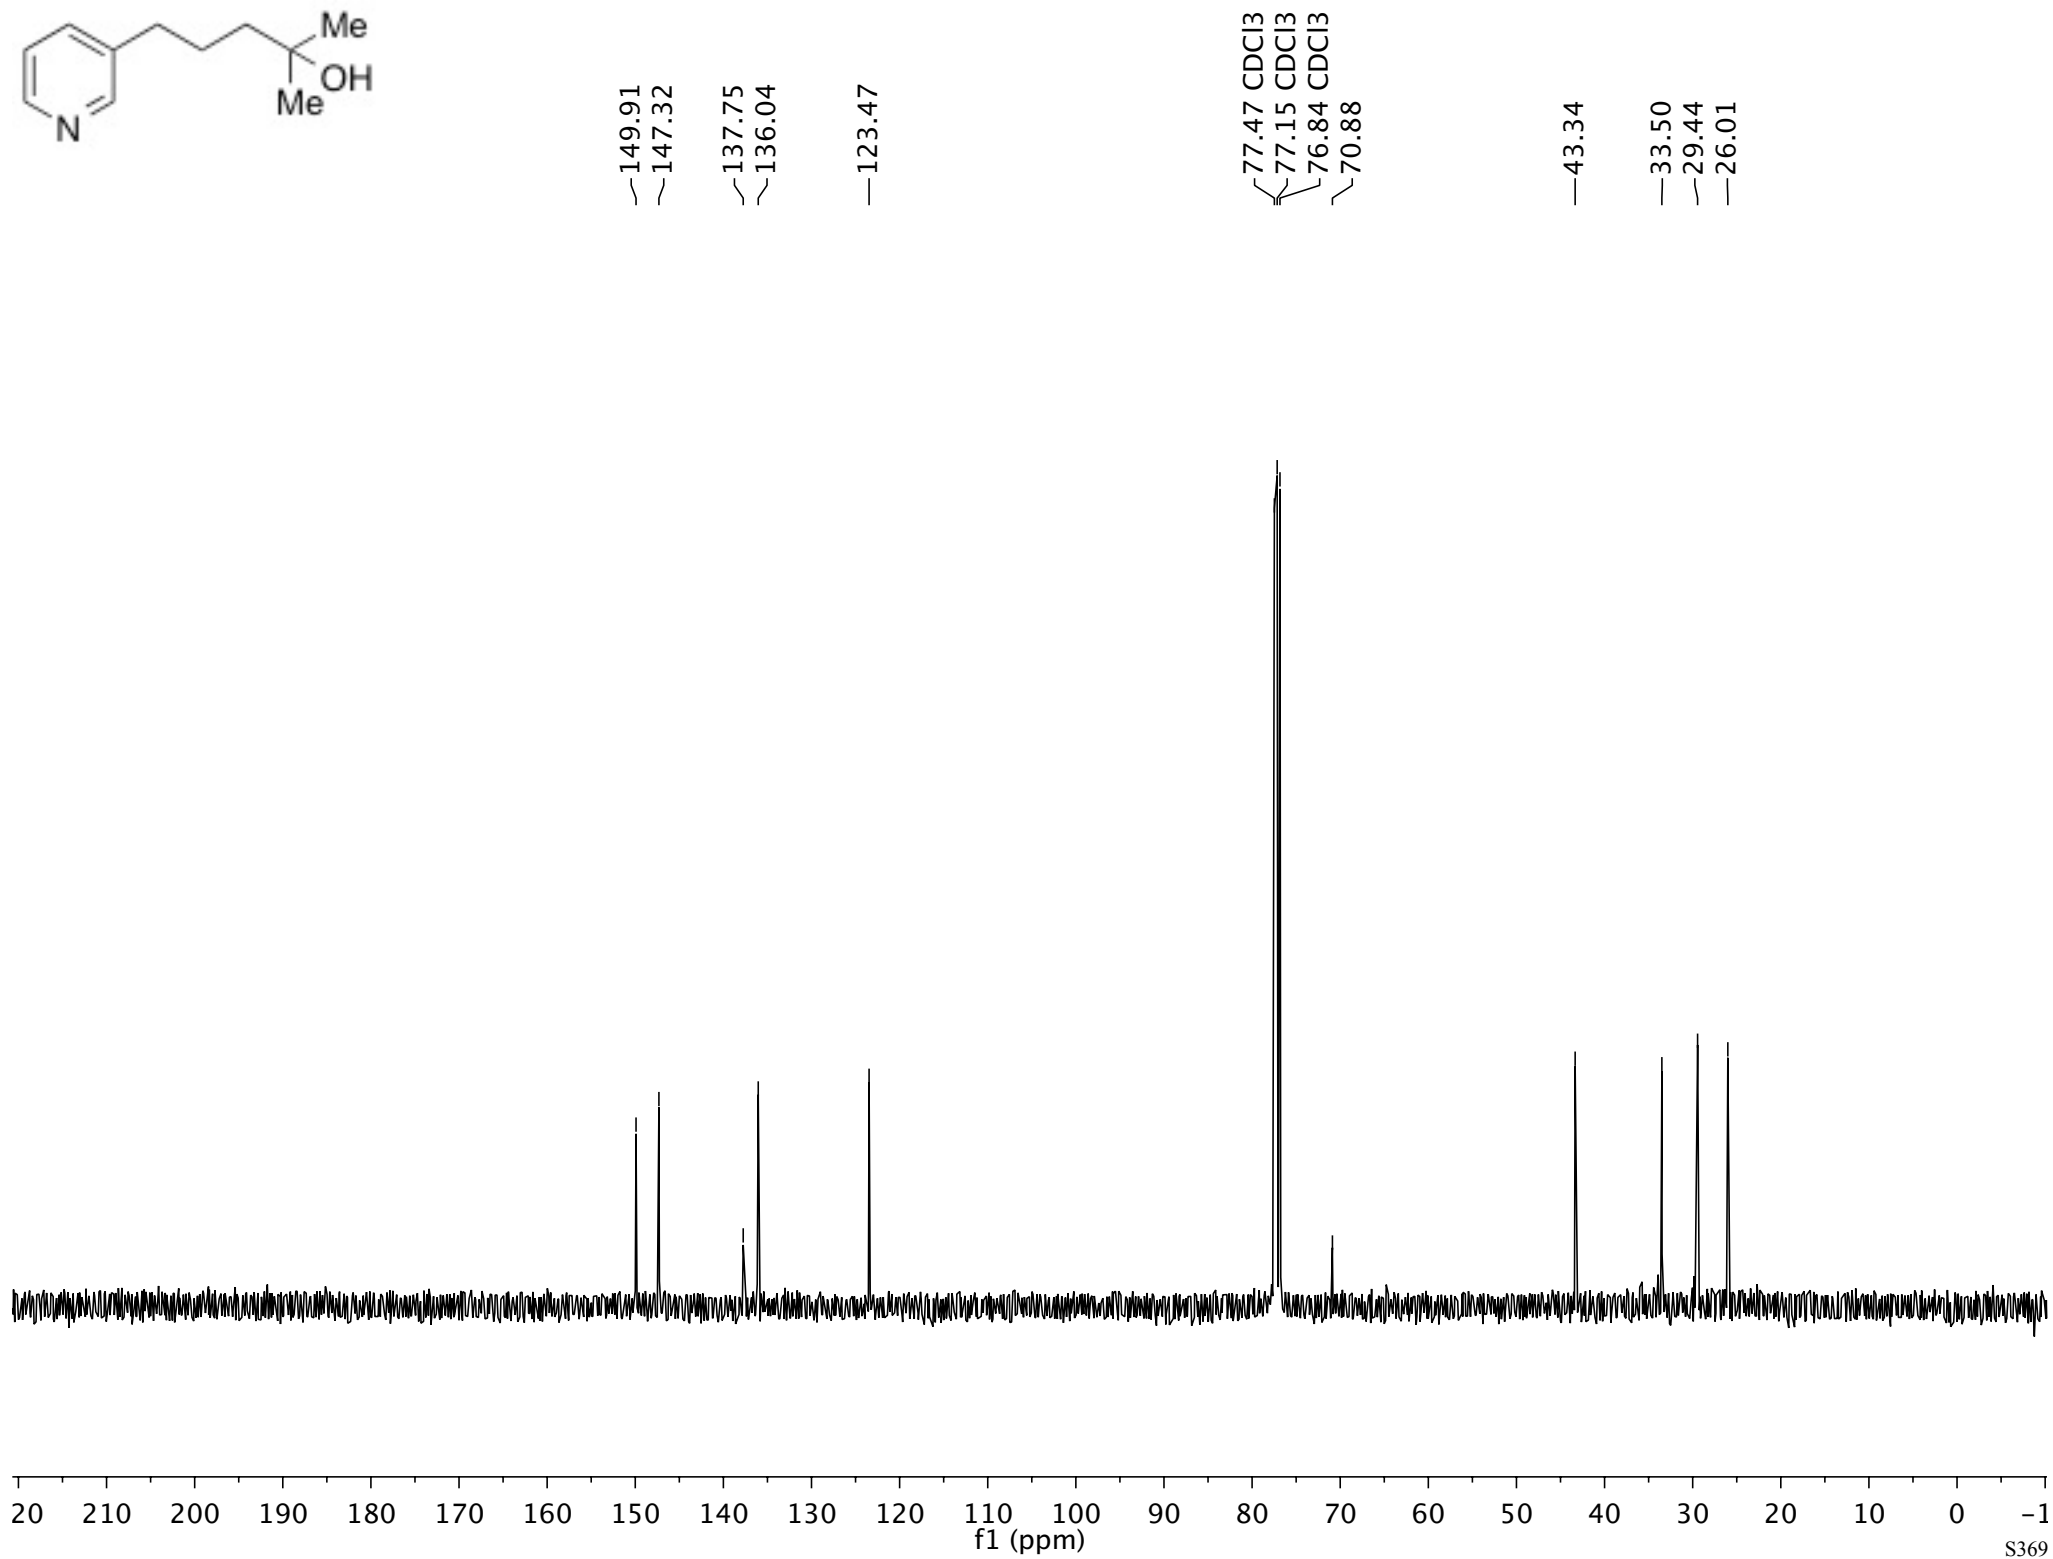

| Parameter              | Value   |
|------------------------|---------|
| Origin                 | Varian  |
| Spectrometer           | inova   |
| Solvent                | CDCl3   |
| Temperature            | 20.0    |
| Pulse Sequence         | s2pul   |
| Experiment             | 1D      |
| Probe                  | hcn     |
| Receiver Gain          | 28      |
| Relaxation Delay       | 10.0000 |
| Pulse Width            | 0.0000  |
| Acquisition Time       | 4.0960  |
| Spectrometer Frequency | 500.07  |
| Spectral Width         | 8000.0  |
| Lowest Frequency       | -1521.1 |
| Nucleus                | 1H      |
| Acquired Size          | 32768   |
| Spectral Size          | 65536   |

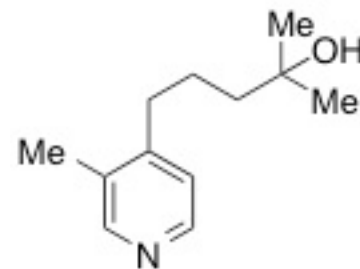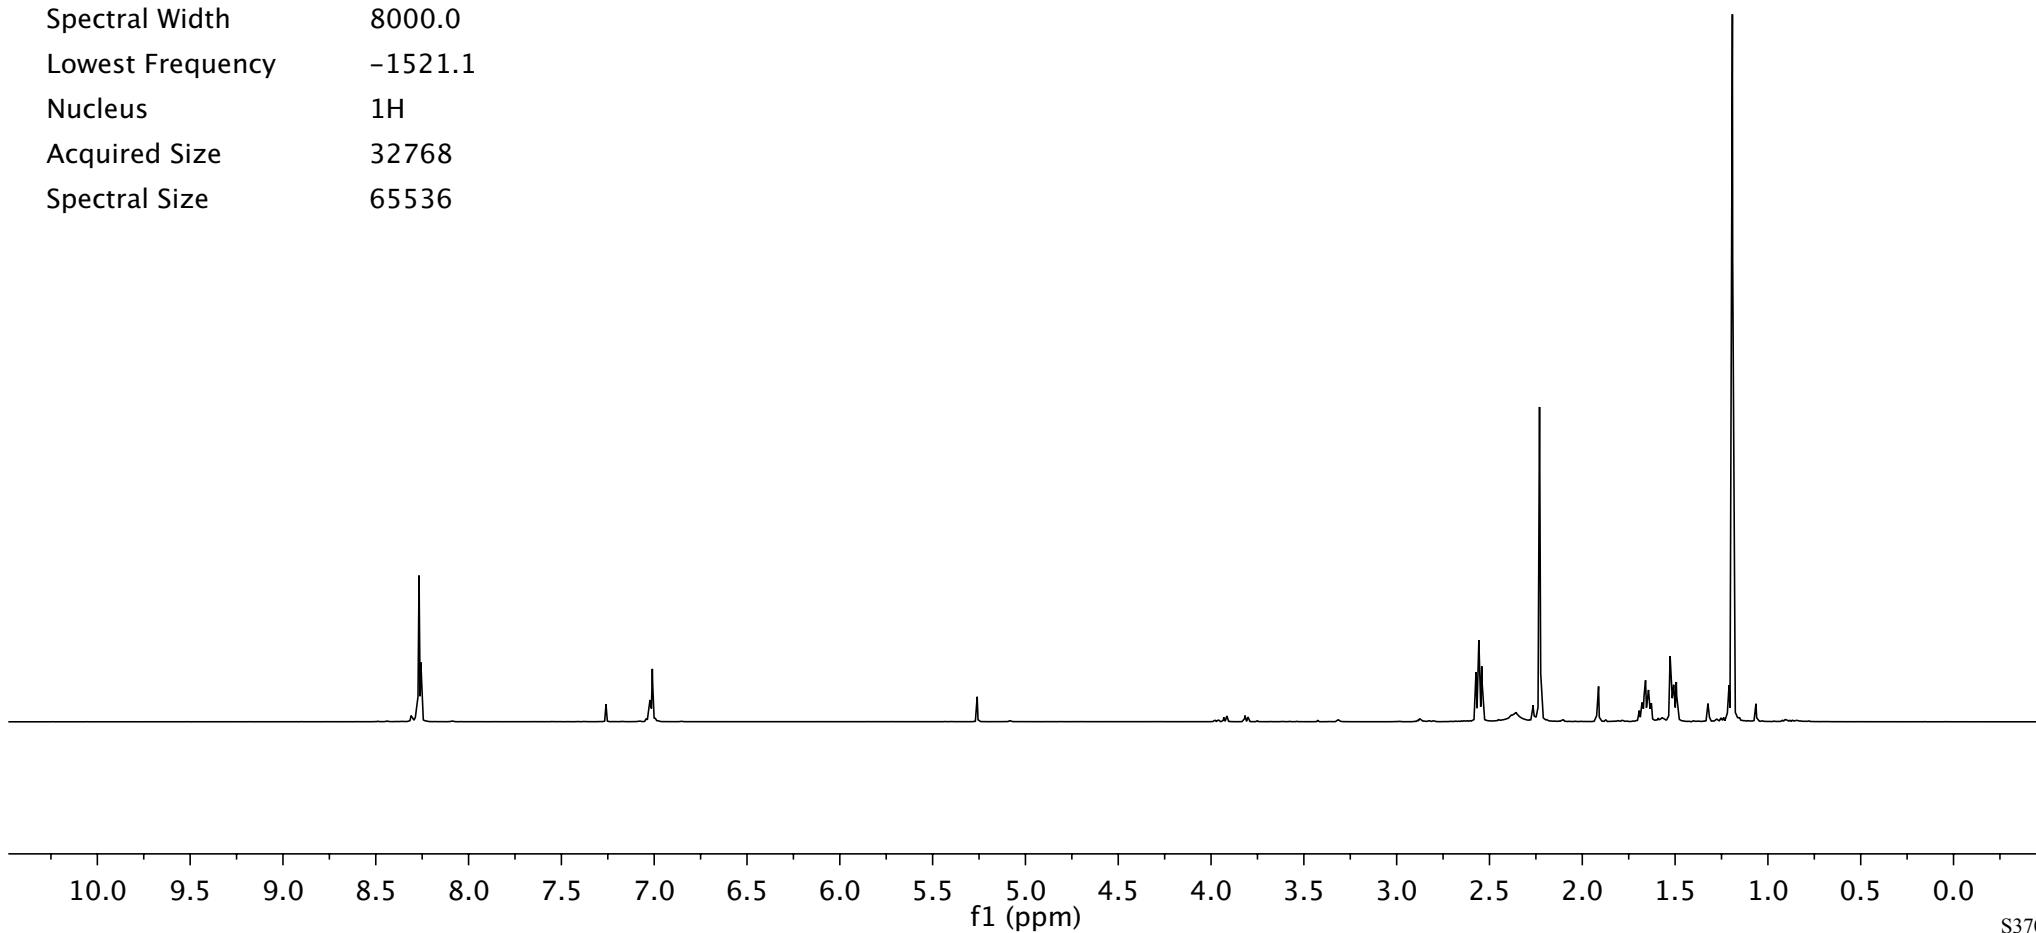

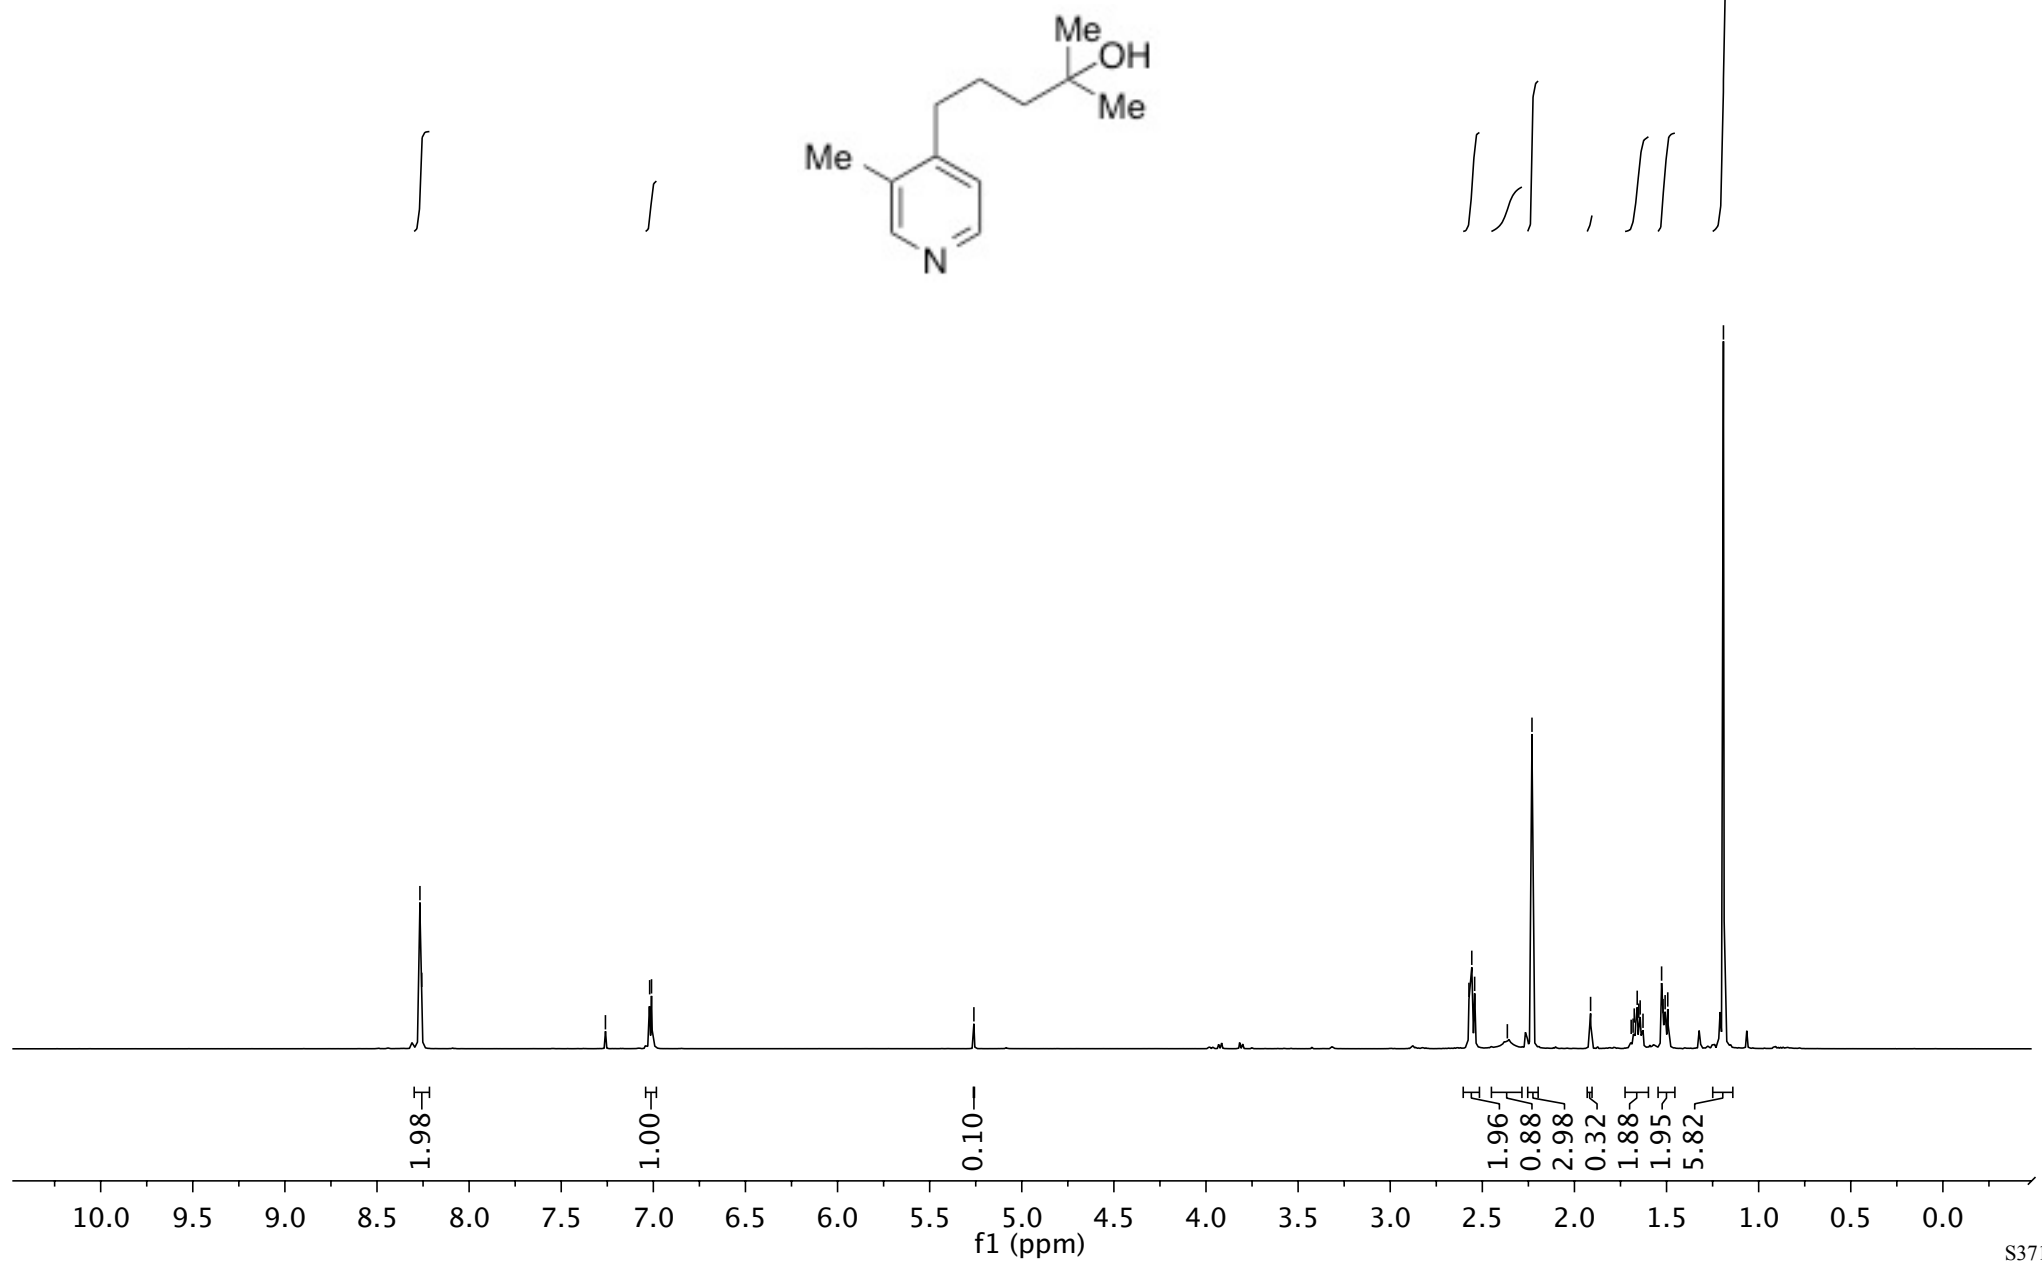

| Parameter              | Value           |
|------------------------|-----------------|
| Origin                 | Varian          |
| Spectrometer           | inova           |
| Solvent                | CDCl3           |
| Temperature            | 20.0            |
| Pulse Sequence         | s2pul           |
| Experiment             | 1D              |
| Probe                  | QUADG           |
| Receiver Gain          | 60              |
| Relaxation Delay       | 2.0000          |
| Pulse Width            | 0.0000          |
| Acquisition Time       | 1.0240          |
| Spectrometer Frequency | 125.60          |
| Spectral Width         | 32000.0         |
| Lowest Frequency       | -2208.3         |
| Nucleus                | <sup>13</sup> C |
| Acquired Size          | 32768           |
| Spectral Size          | 65536           |

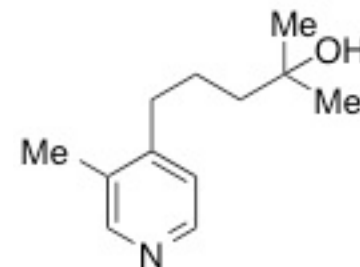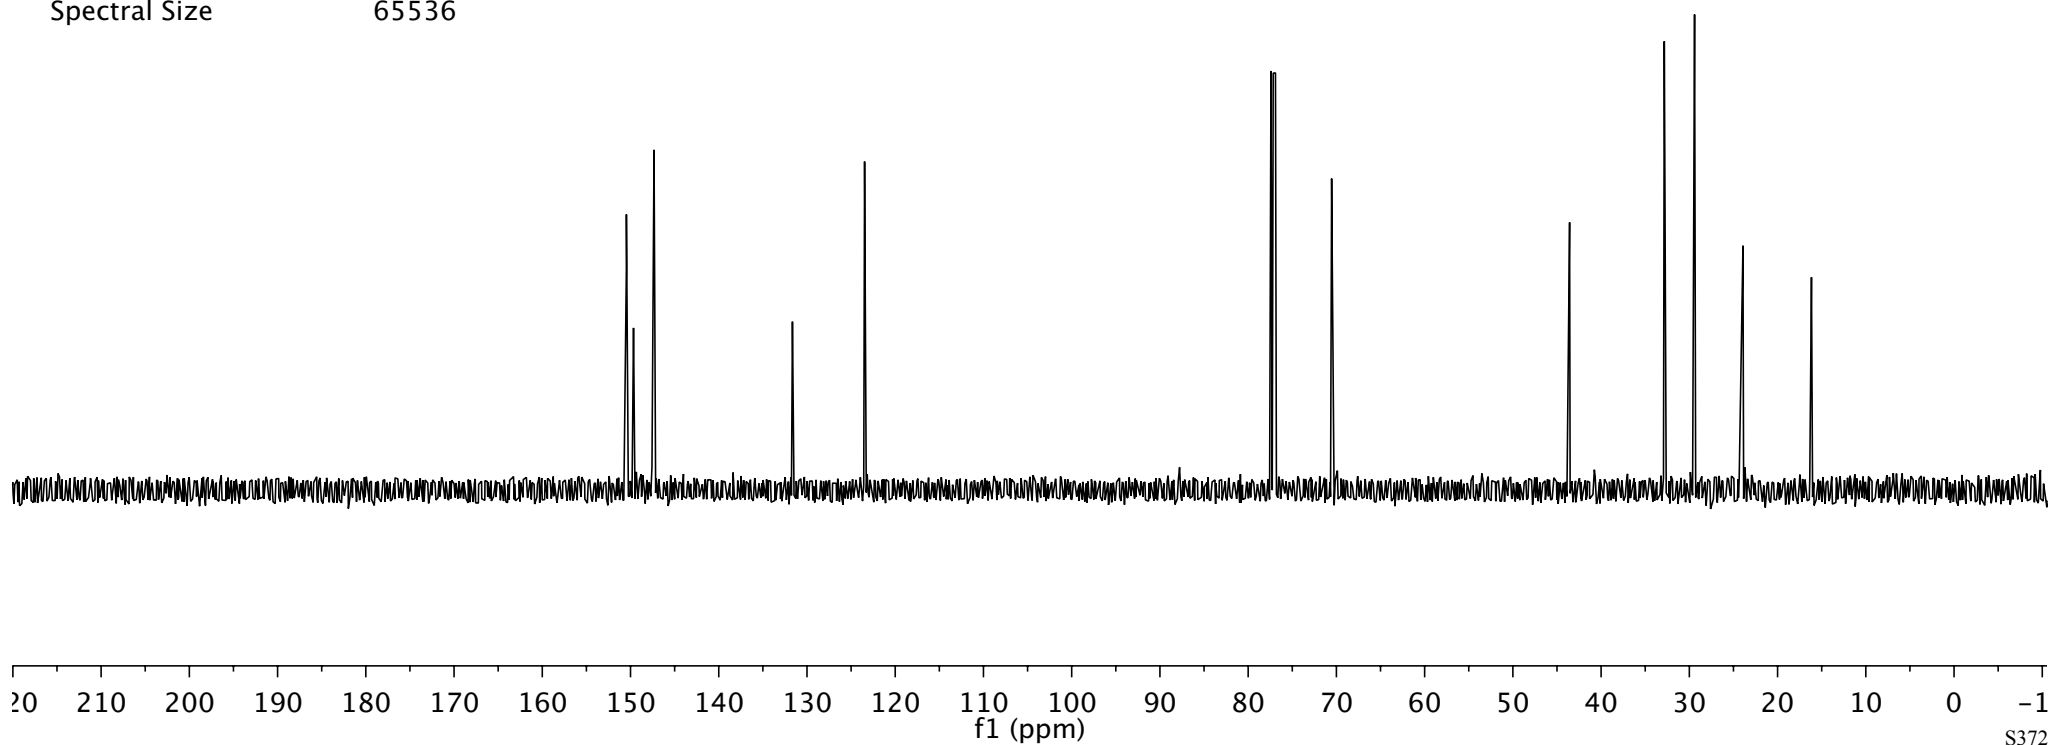

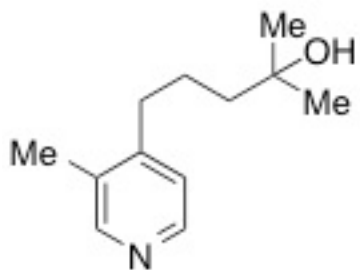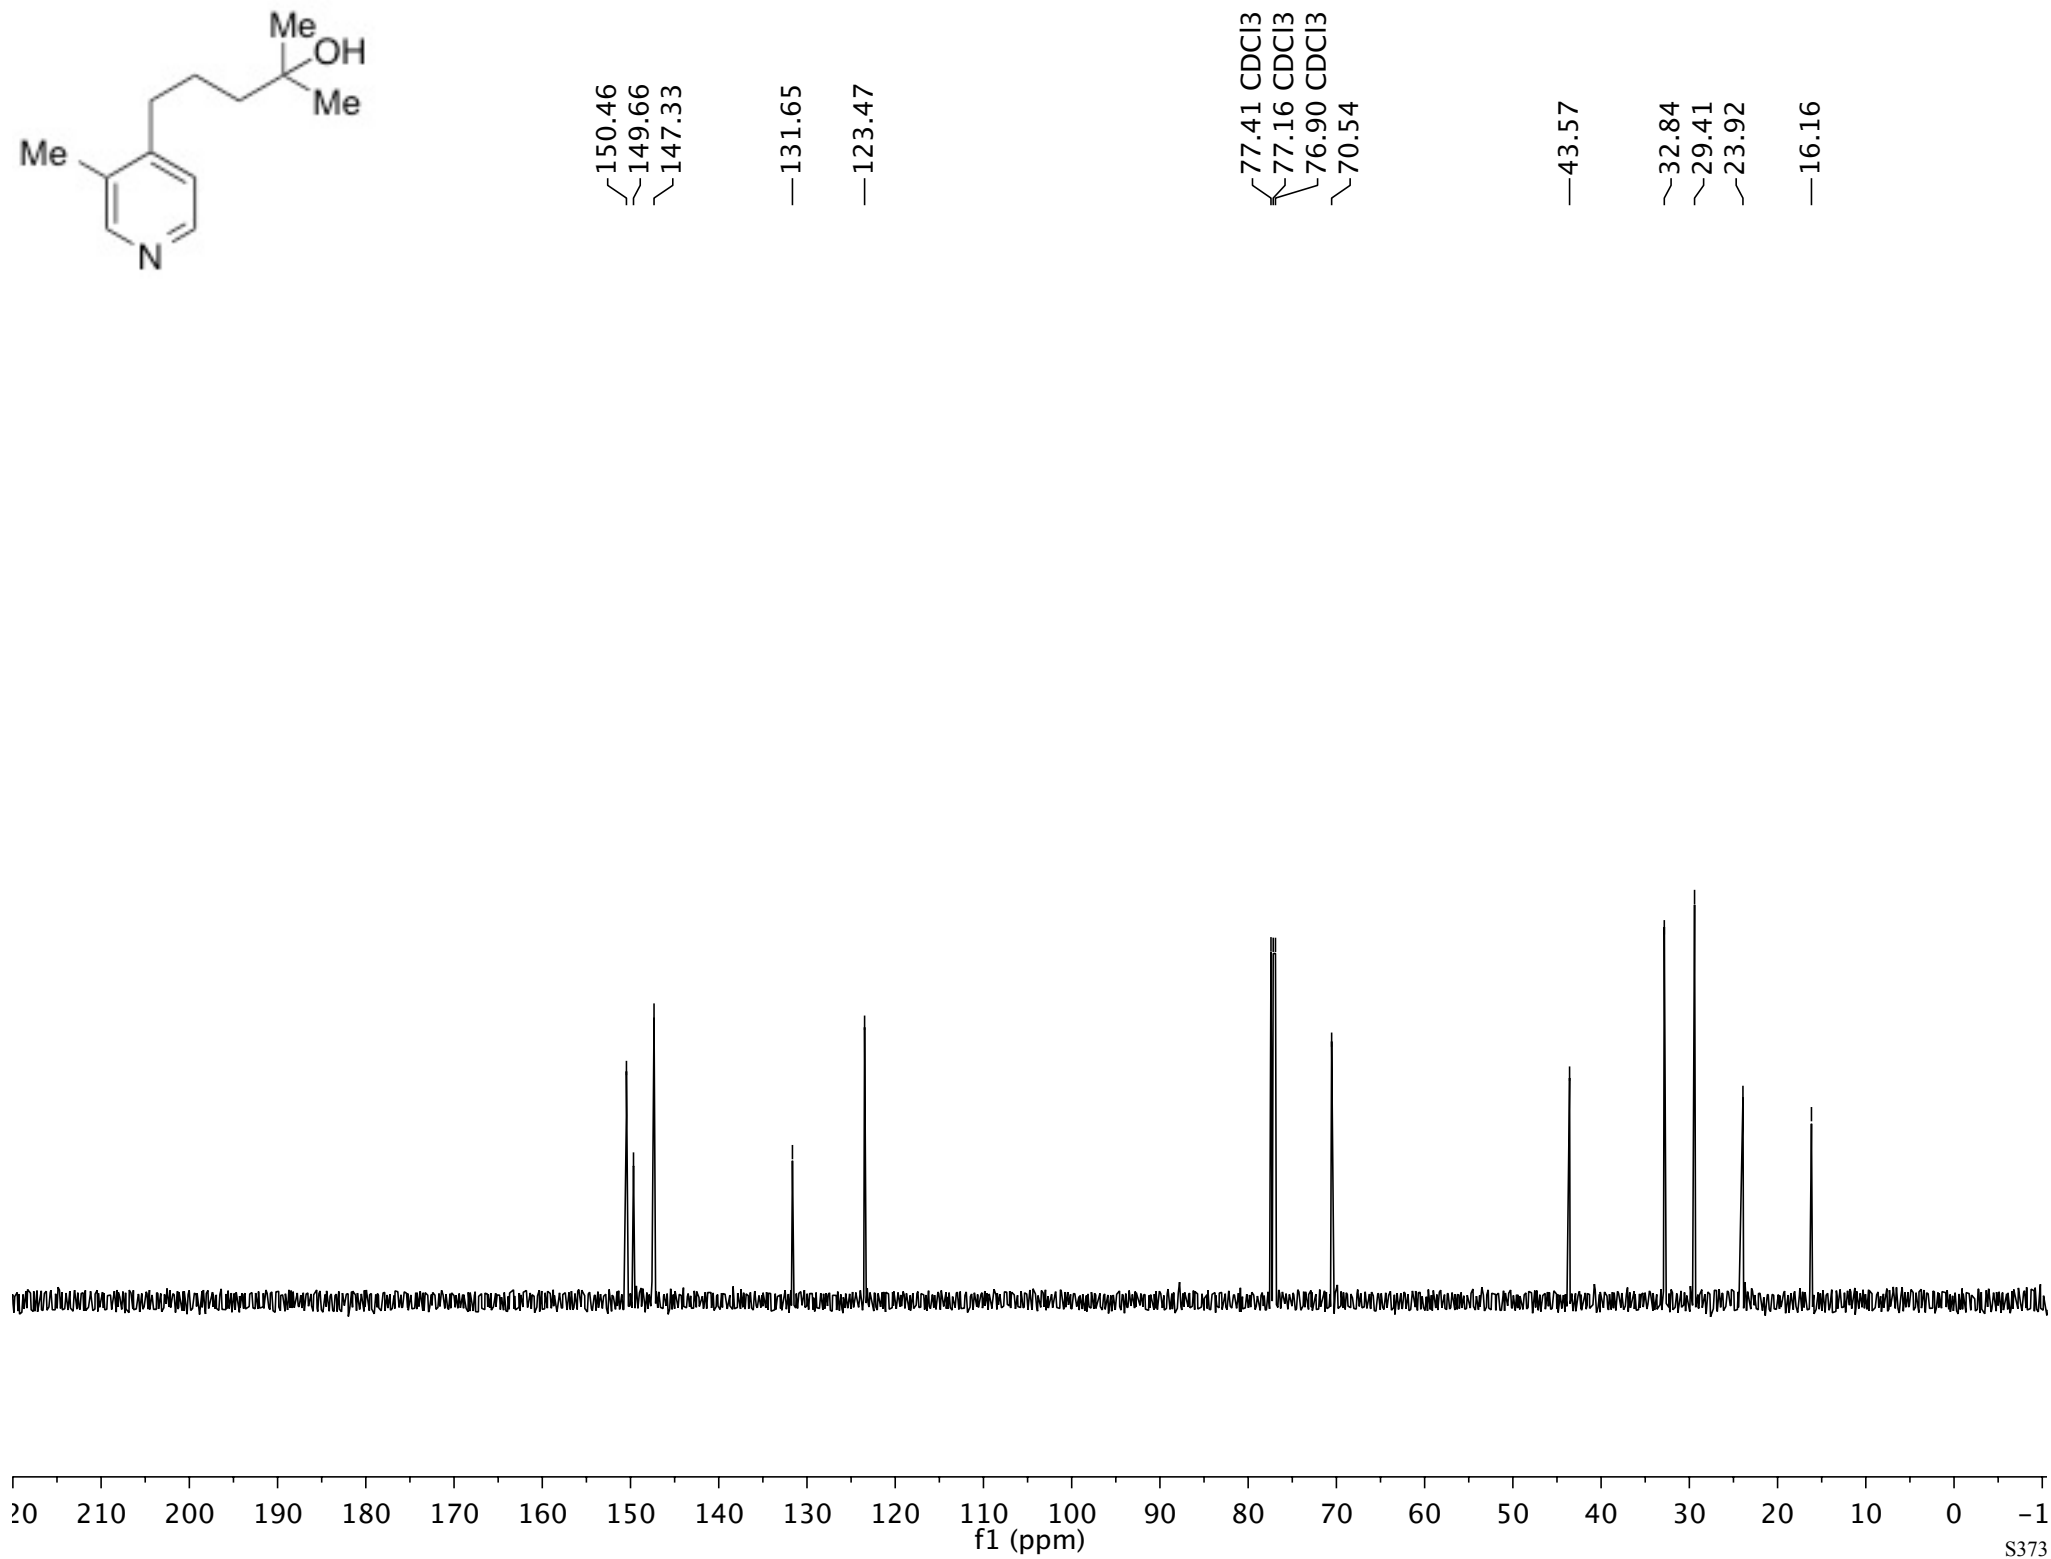

| Parameter              | Value   |
|------------------------|---------|
| Origin                 | Varian  |
| Spectrometer           | inova   |
| Solvent                | CDCl3   |
| Temperature            | 20.0    |
| Pulse Sequence         | s2pul   |
| Experiment             | 1D      |
| Probe                  | hcn     |
| Receiver Gain          | 26      |
| Relaxation Delay       | 10.0000 |
| Pulse Width            | 0.0000  |
| Acquisition Time       | 4.0960  |
| Spectrometer Frequency | 500.07  |
| Spectral Width         | 8000.0  |
| Lowest Frequency       | -1520.6 |
| Nucleus                | 1H      |
| Acquired Size          | 32768   |
| Spectral Size          | 65536   |

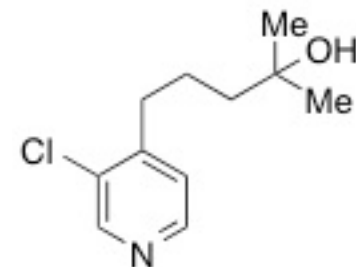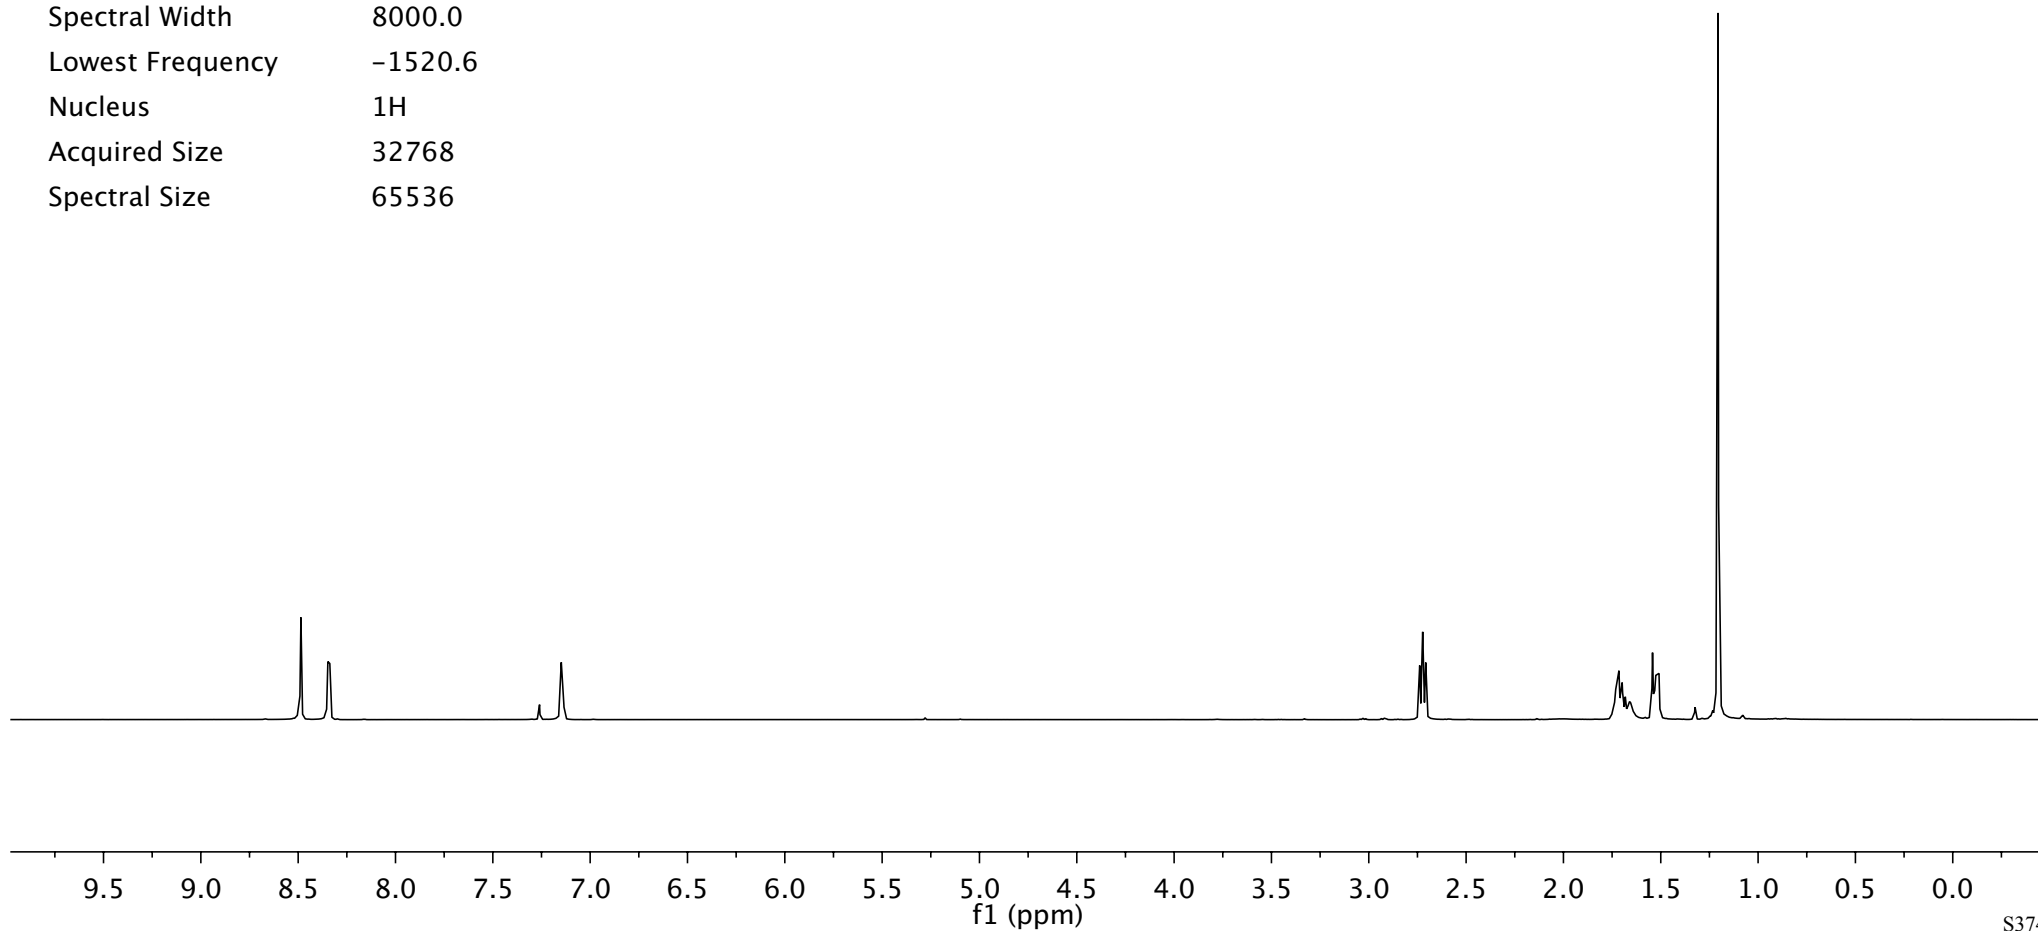

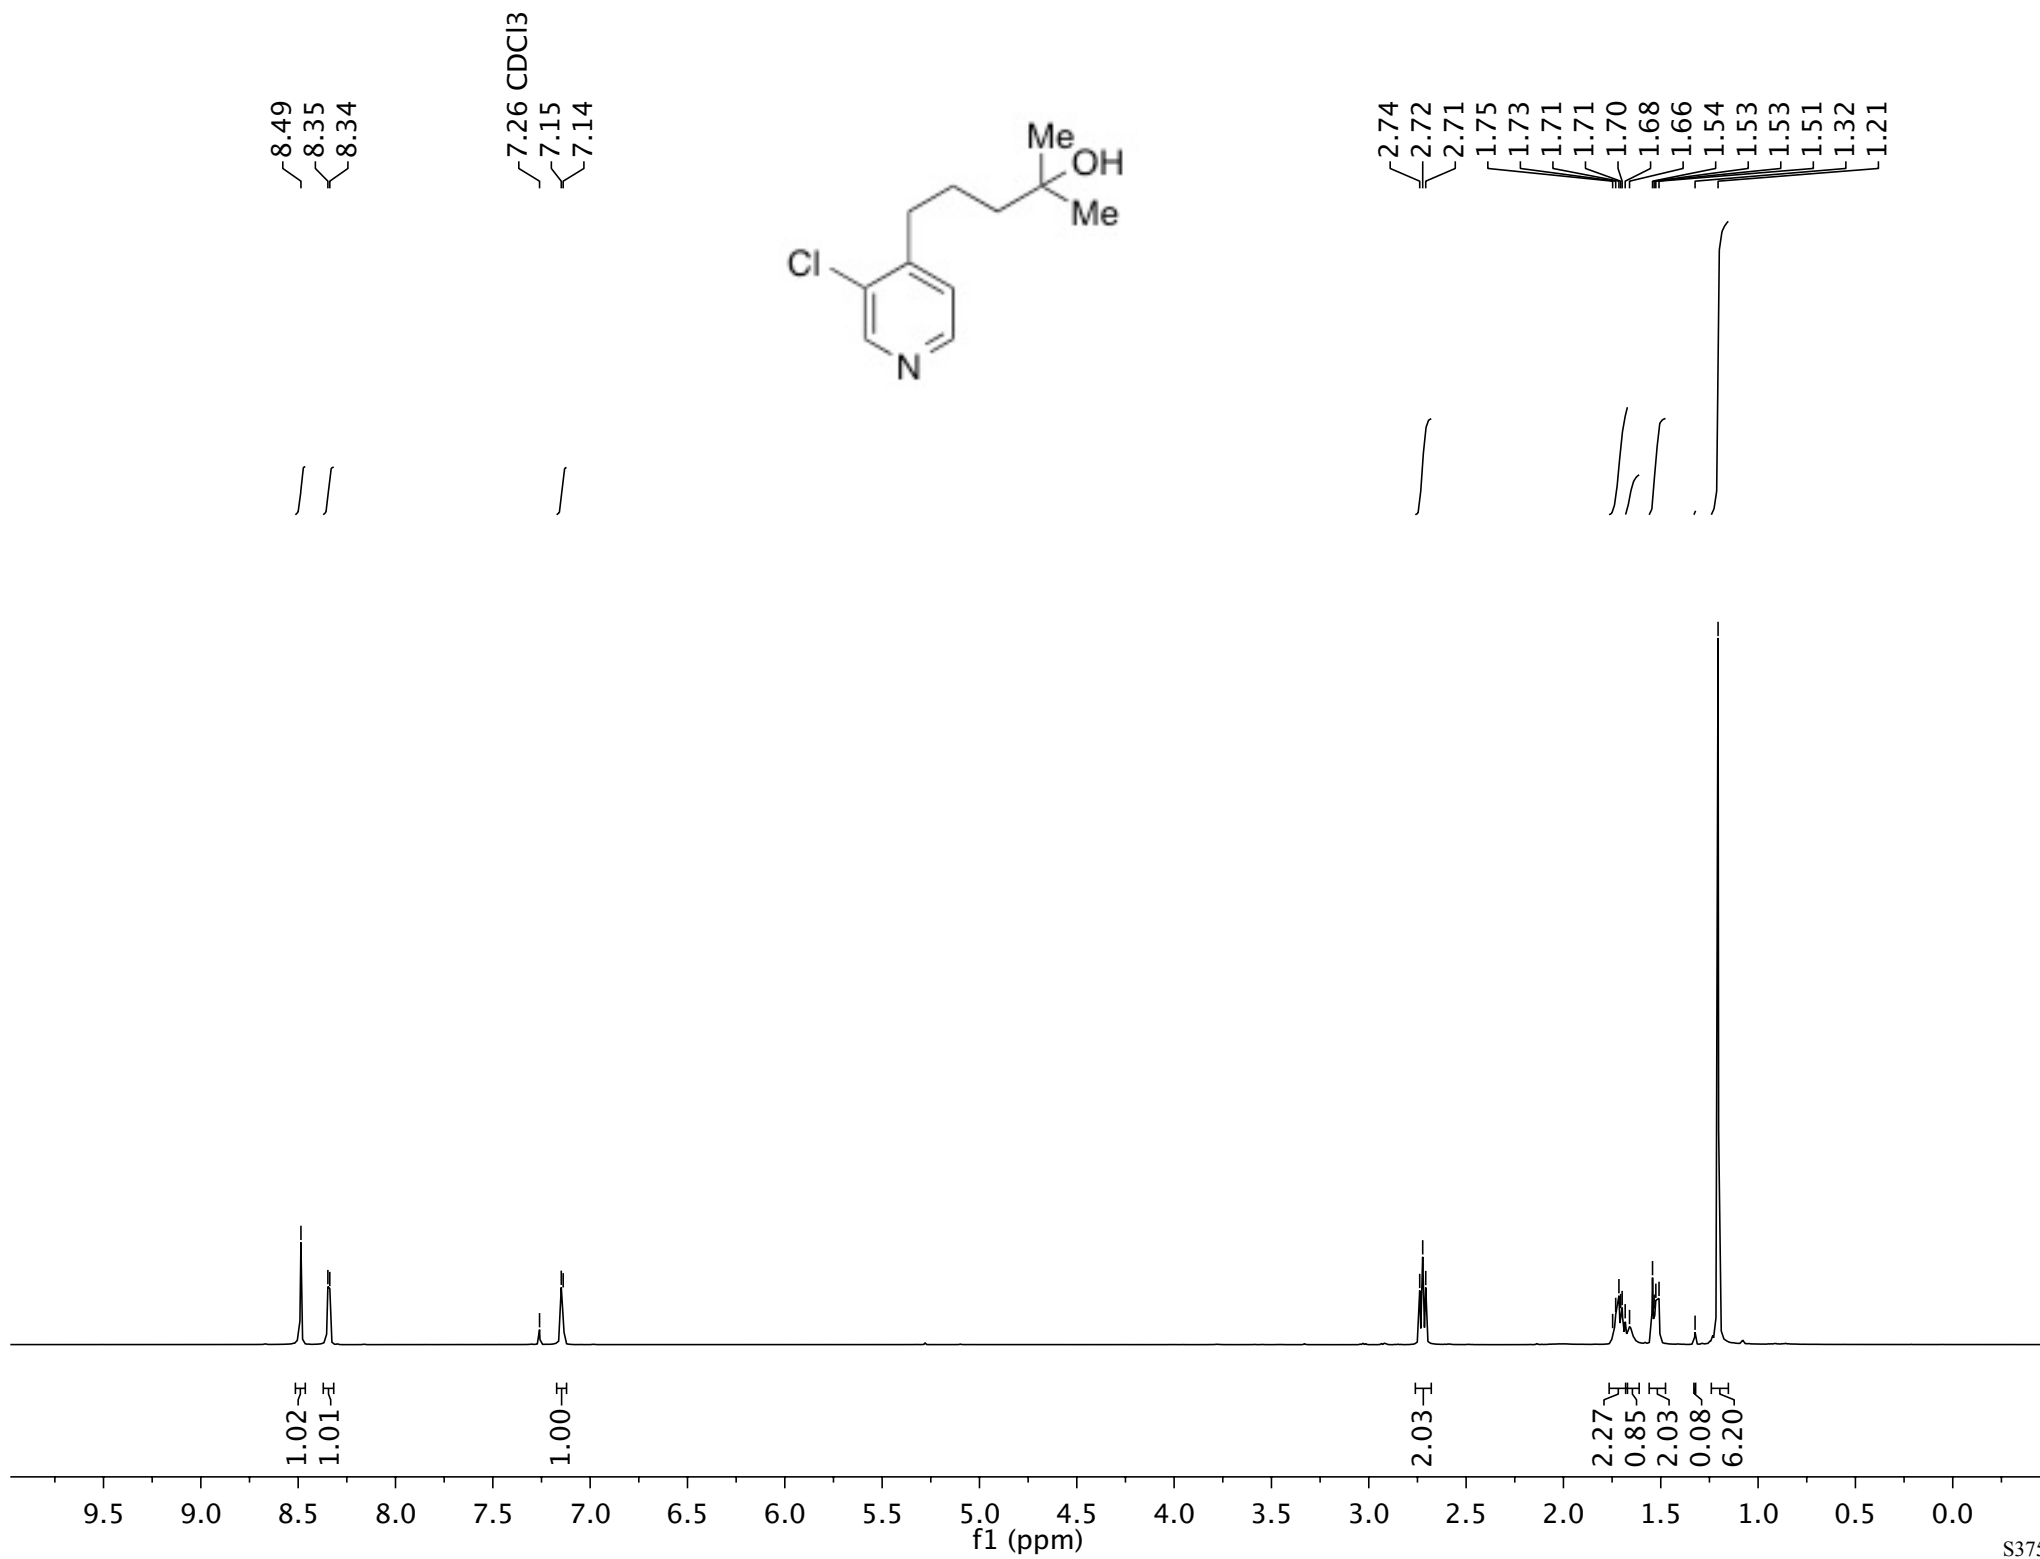



| Parameter              | Value   |
|------------------------|---------|
| Origin                 | Varian  |
| Spectrometer           | inova   |
| Solvent                | CDCl3   |
| Temperature            | 20.0    |
| Pulse Sequence         | s2pul   |
| Experiment             | 1D      |
| Probe                  | QUADG   |
| Receiver Gain          | 60      |
| Relaxation Delay       | 1.0000  |
| Pulse Width            | 0.0000  |
| Acquisition Time       | 1.0240  |
| Spectrometer Frequency | 125.60  |
| Spectral Width         | 32000.0 |
| Lowest Frequency       | -2205.0 |
| Nucleus                | 13C     |
| Acquired Size          | 32768   |
| Spectral Size          | 65536   |

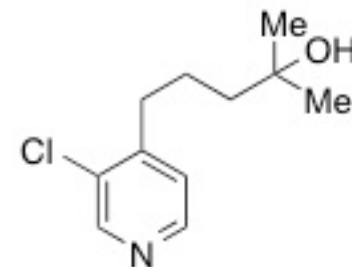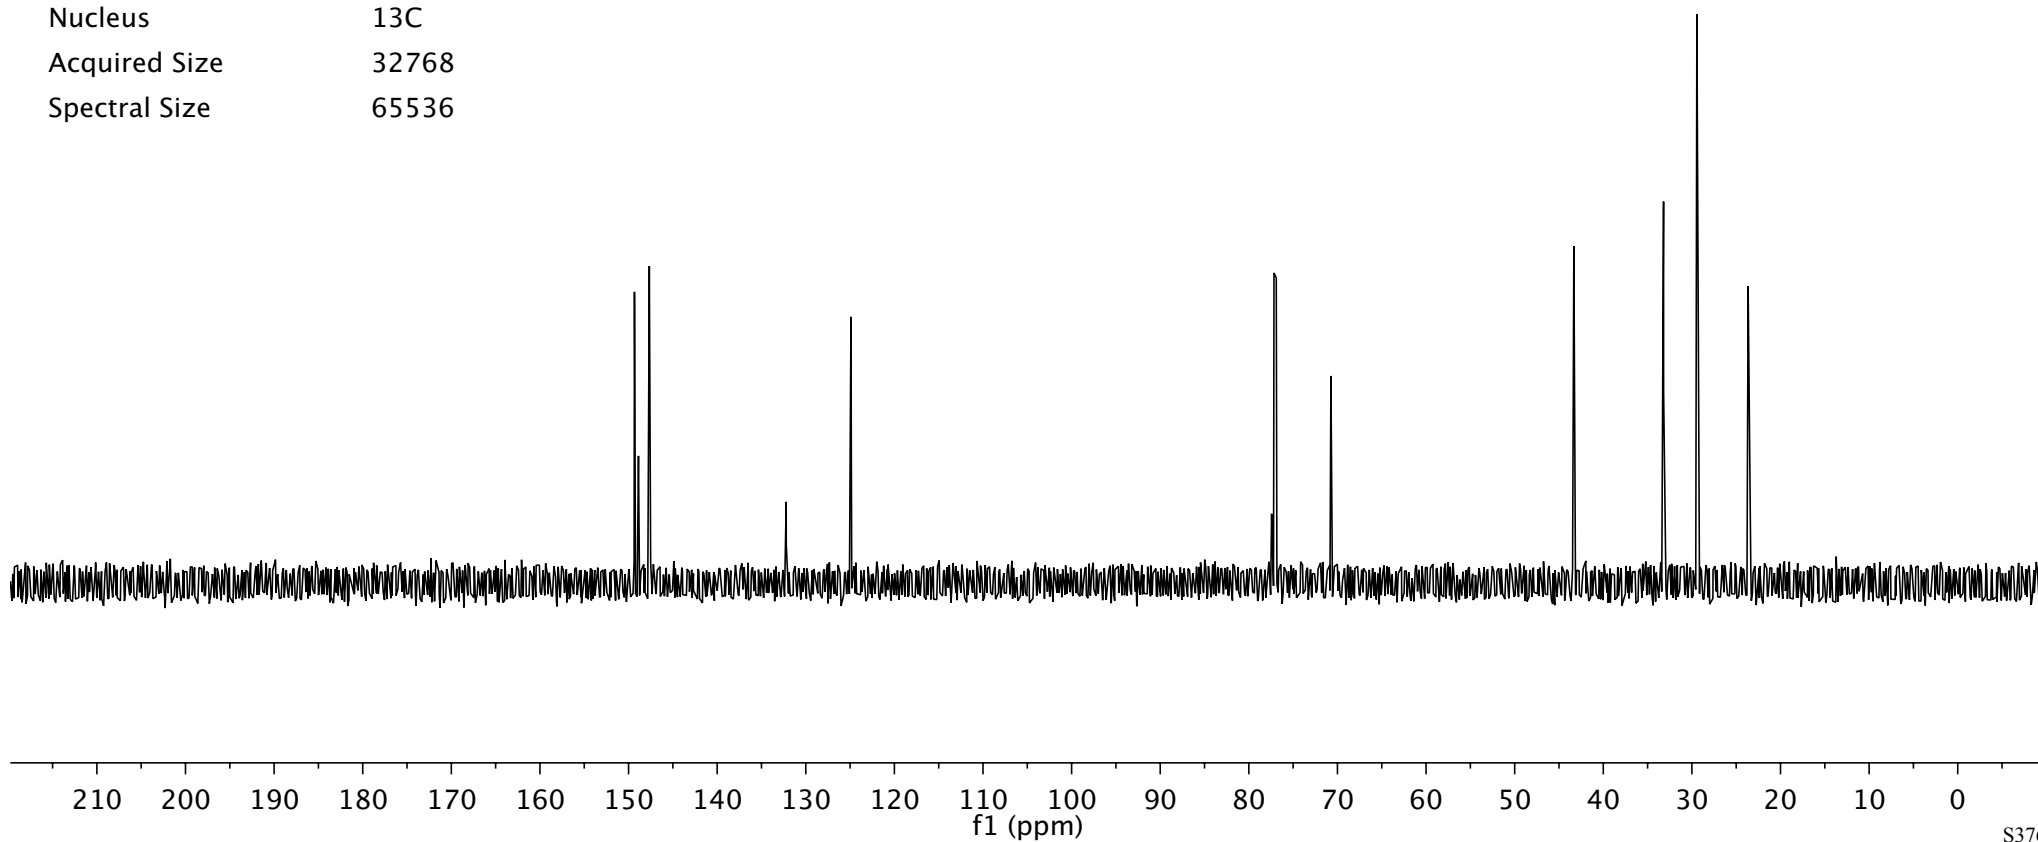

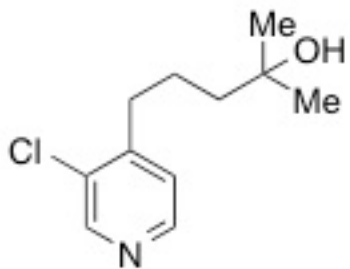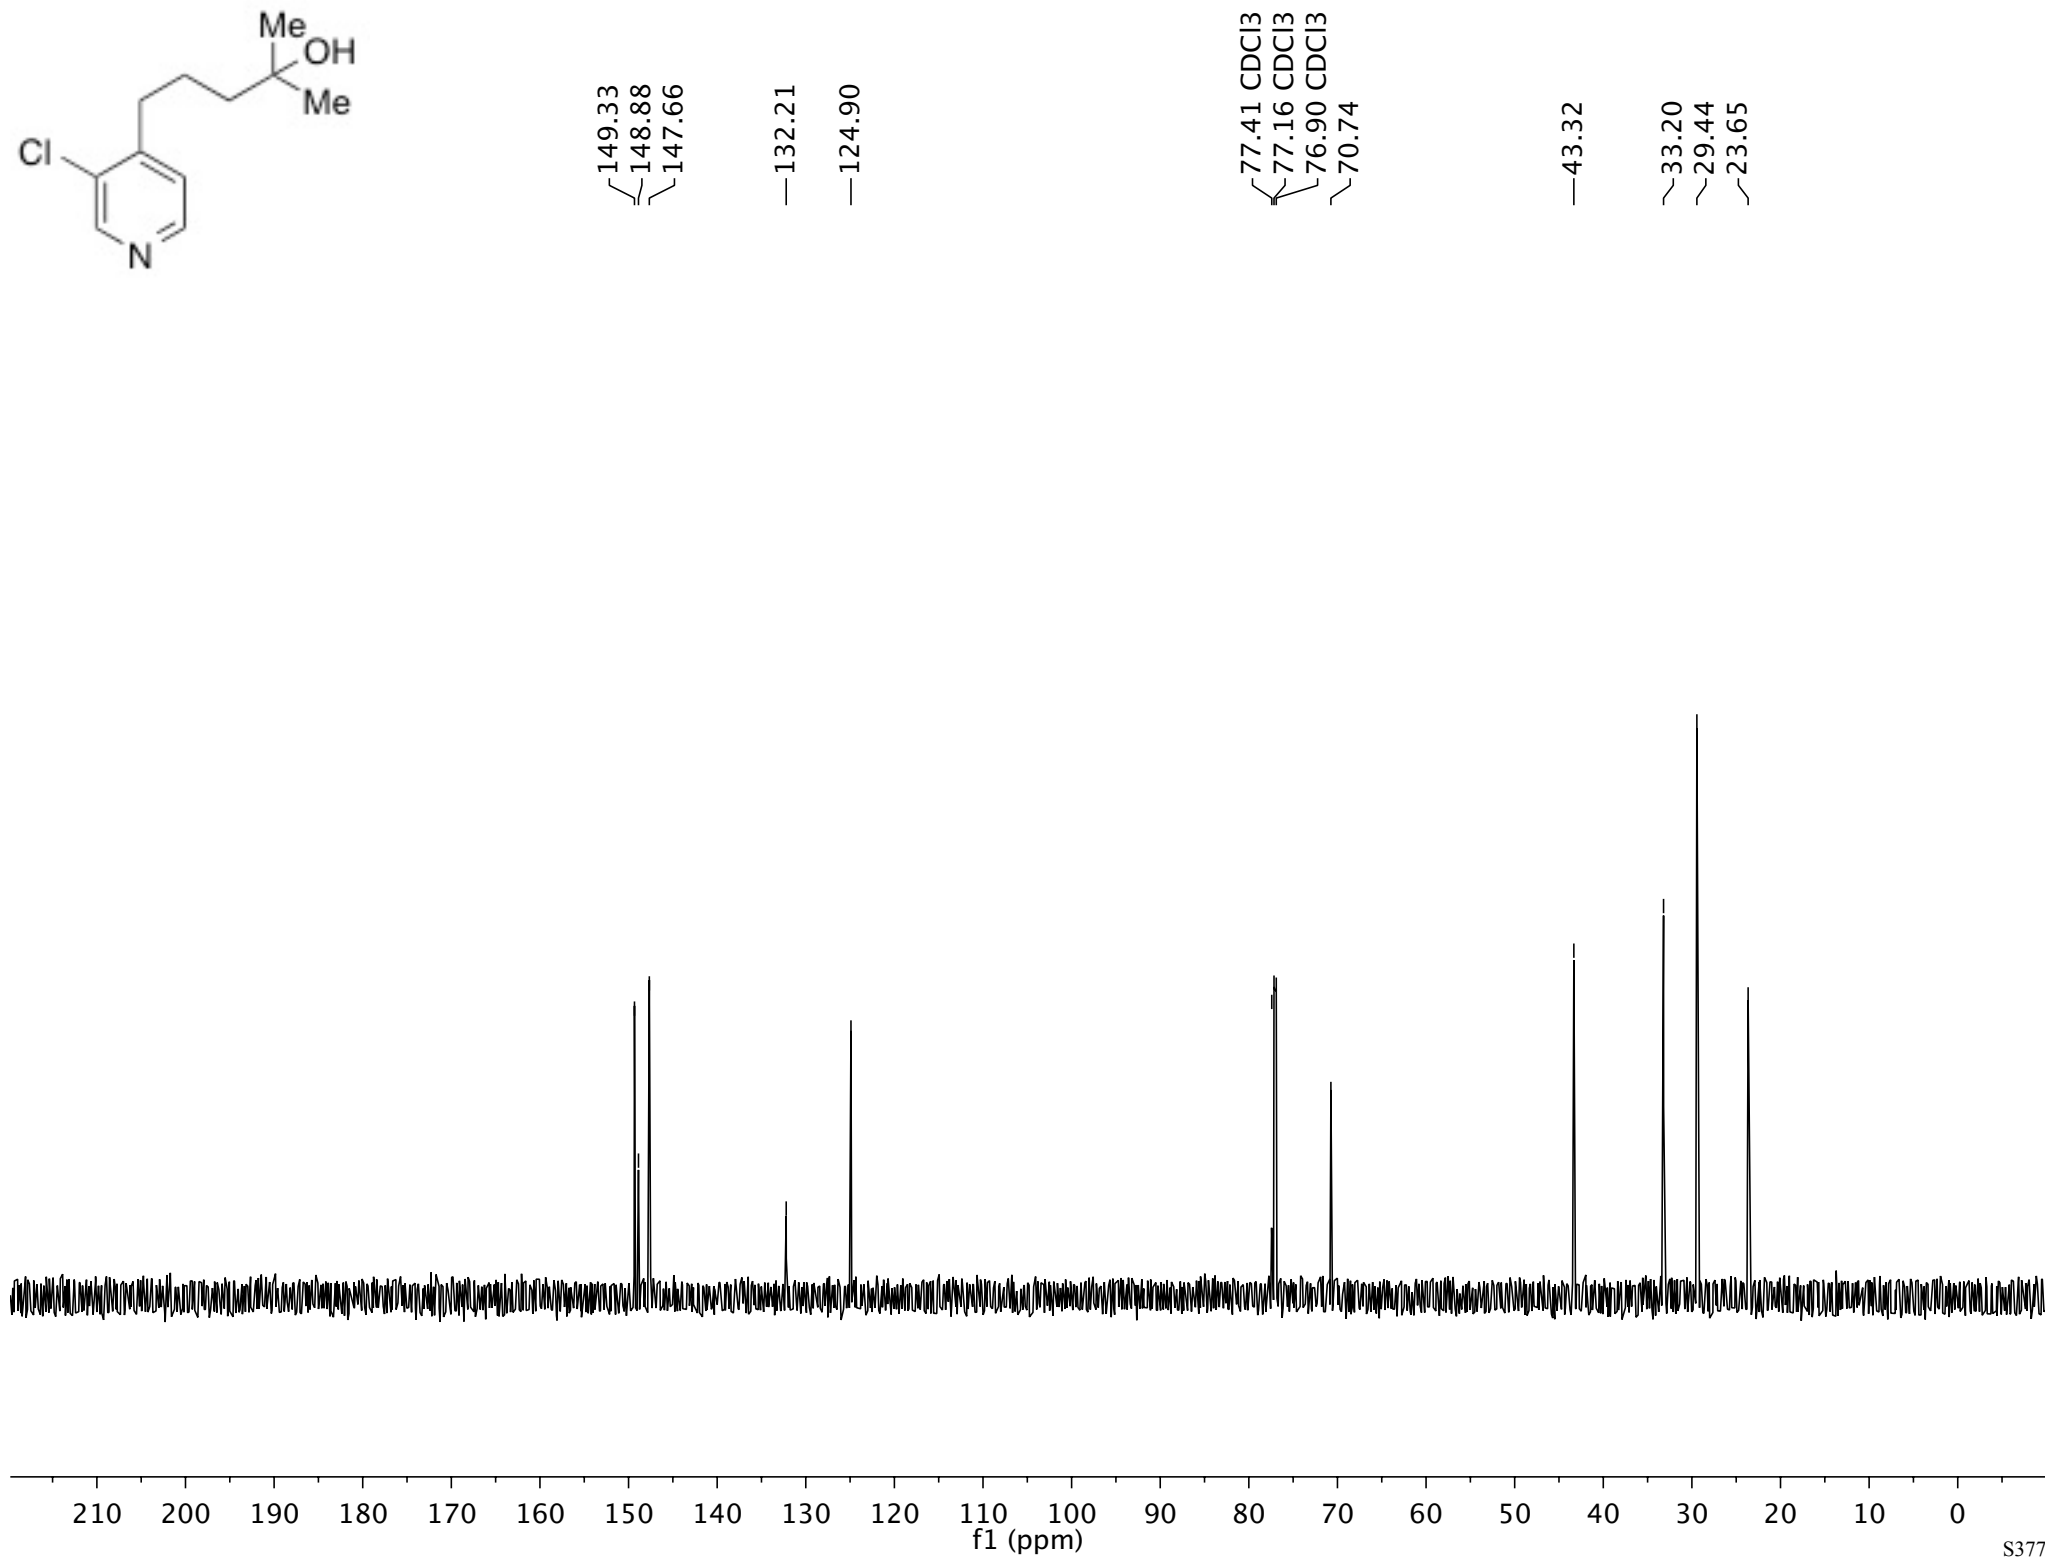

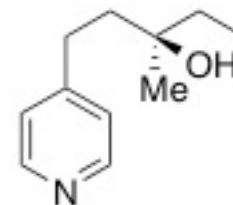

| Parameter              | Value   |
|------------------------|---------|
| Origin                 | Varian  |
| Spectrometer           | inova   |
| Solvent                | CDCl3   |
| Temperature            | 20.0    |
| Pulse Sequence         | s2pul   |
| Experiment             | 1D      |
| Probe                  | QUADG   |
| Receiver Gain          | 56      |
| Relaxation Delay       | 0.0000  |
| Pulse Width            | 0.0000  |
| Acquisition Time       | 4.0960  |
| Spectrometer Frequency | 499.43  |
| Spectral Width         | 8000.0  |
| Lowest Frequency       | -1508.4 |
| Nucleus                | 1H      |
| Acquired Size          | 32768   |
| Spectral Size          | 65536   |

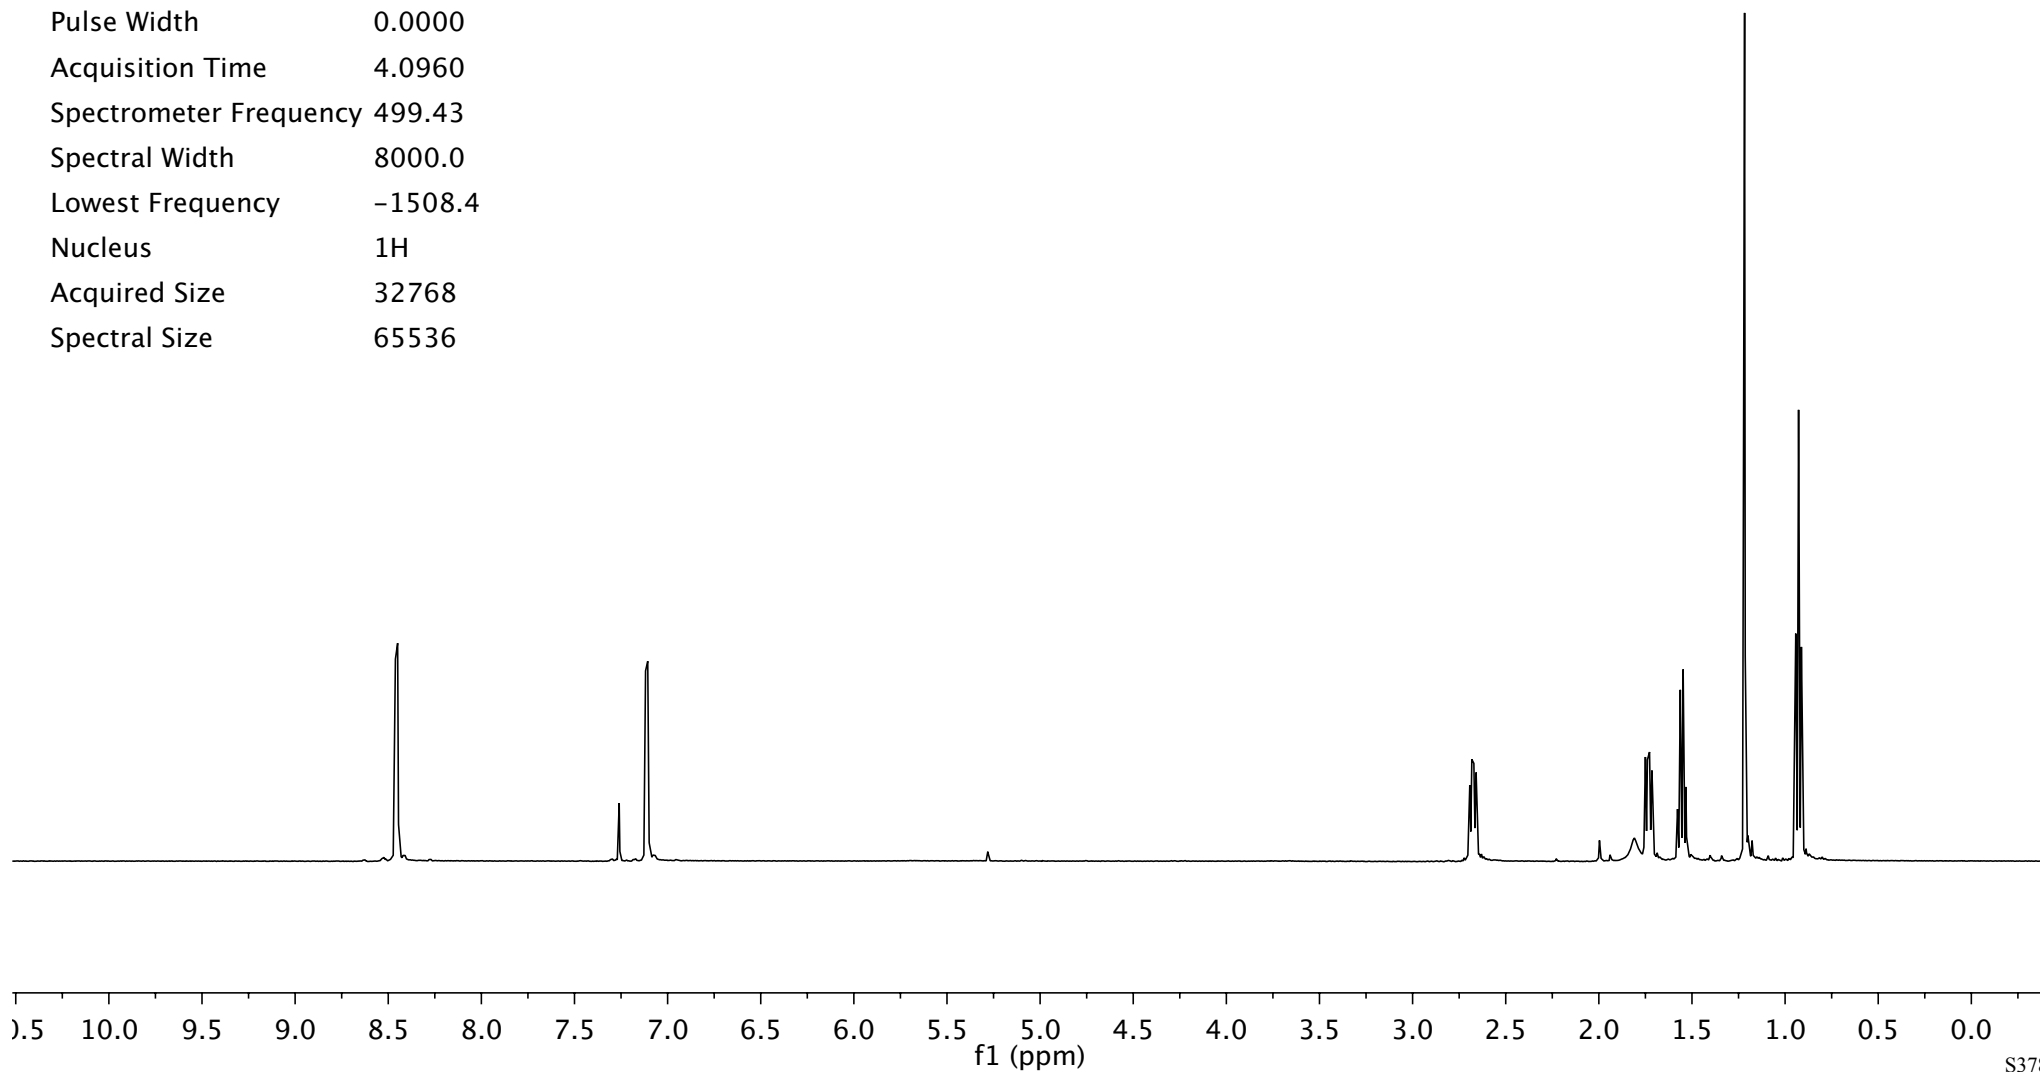

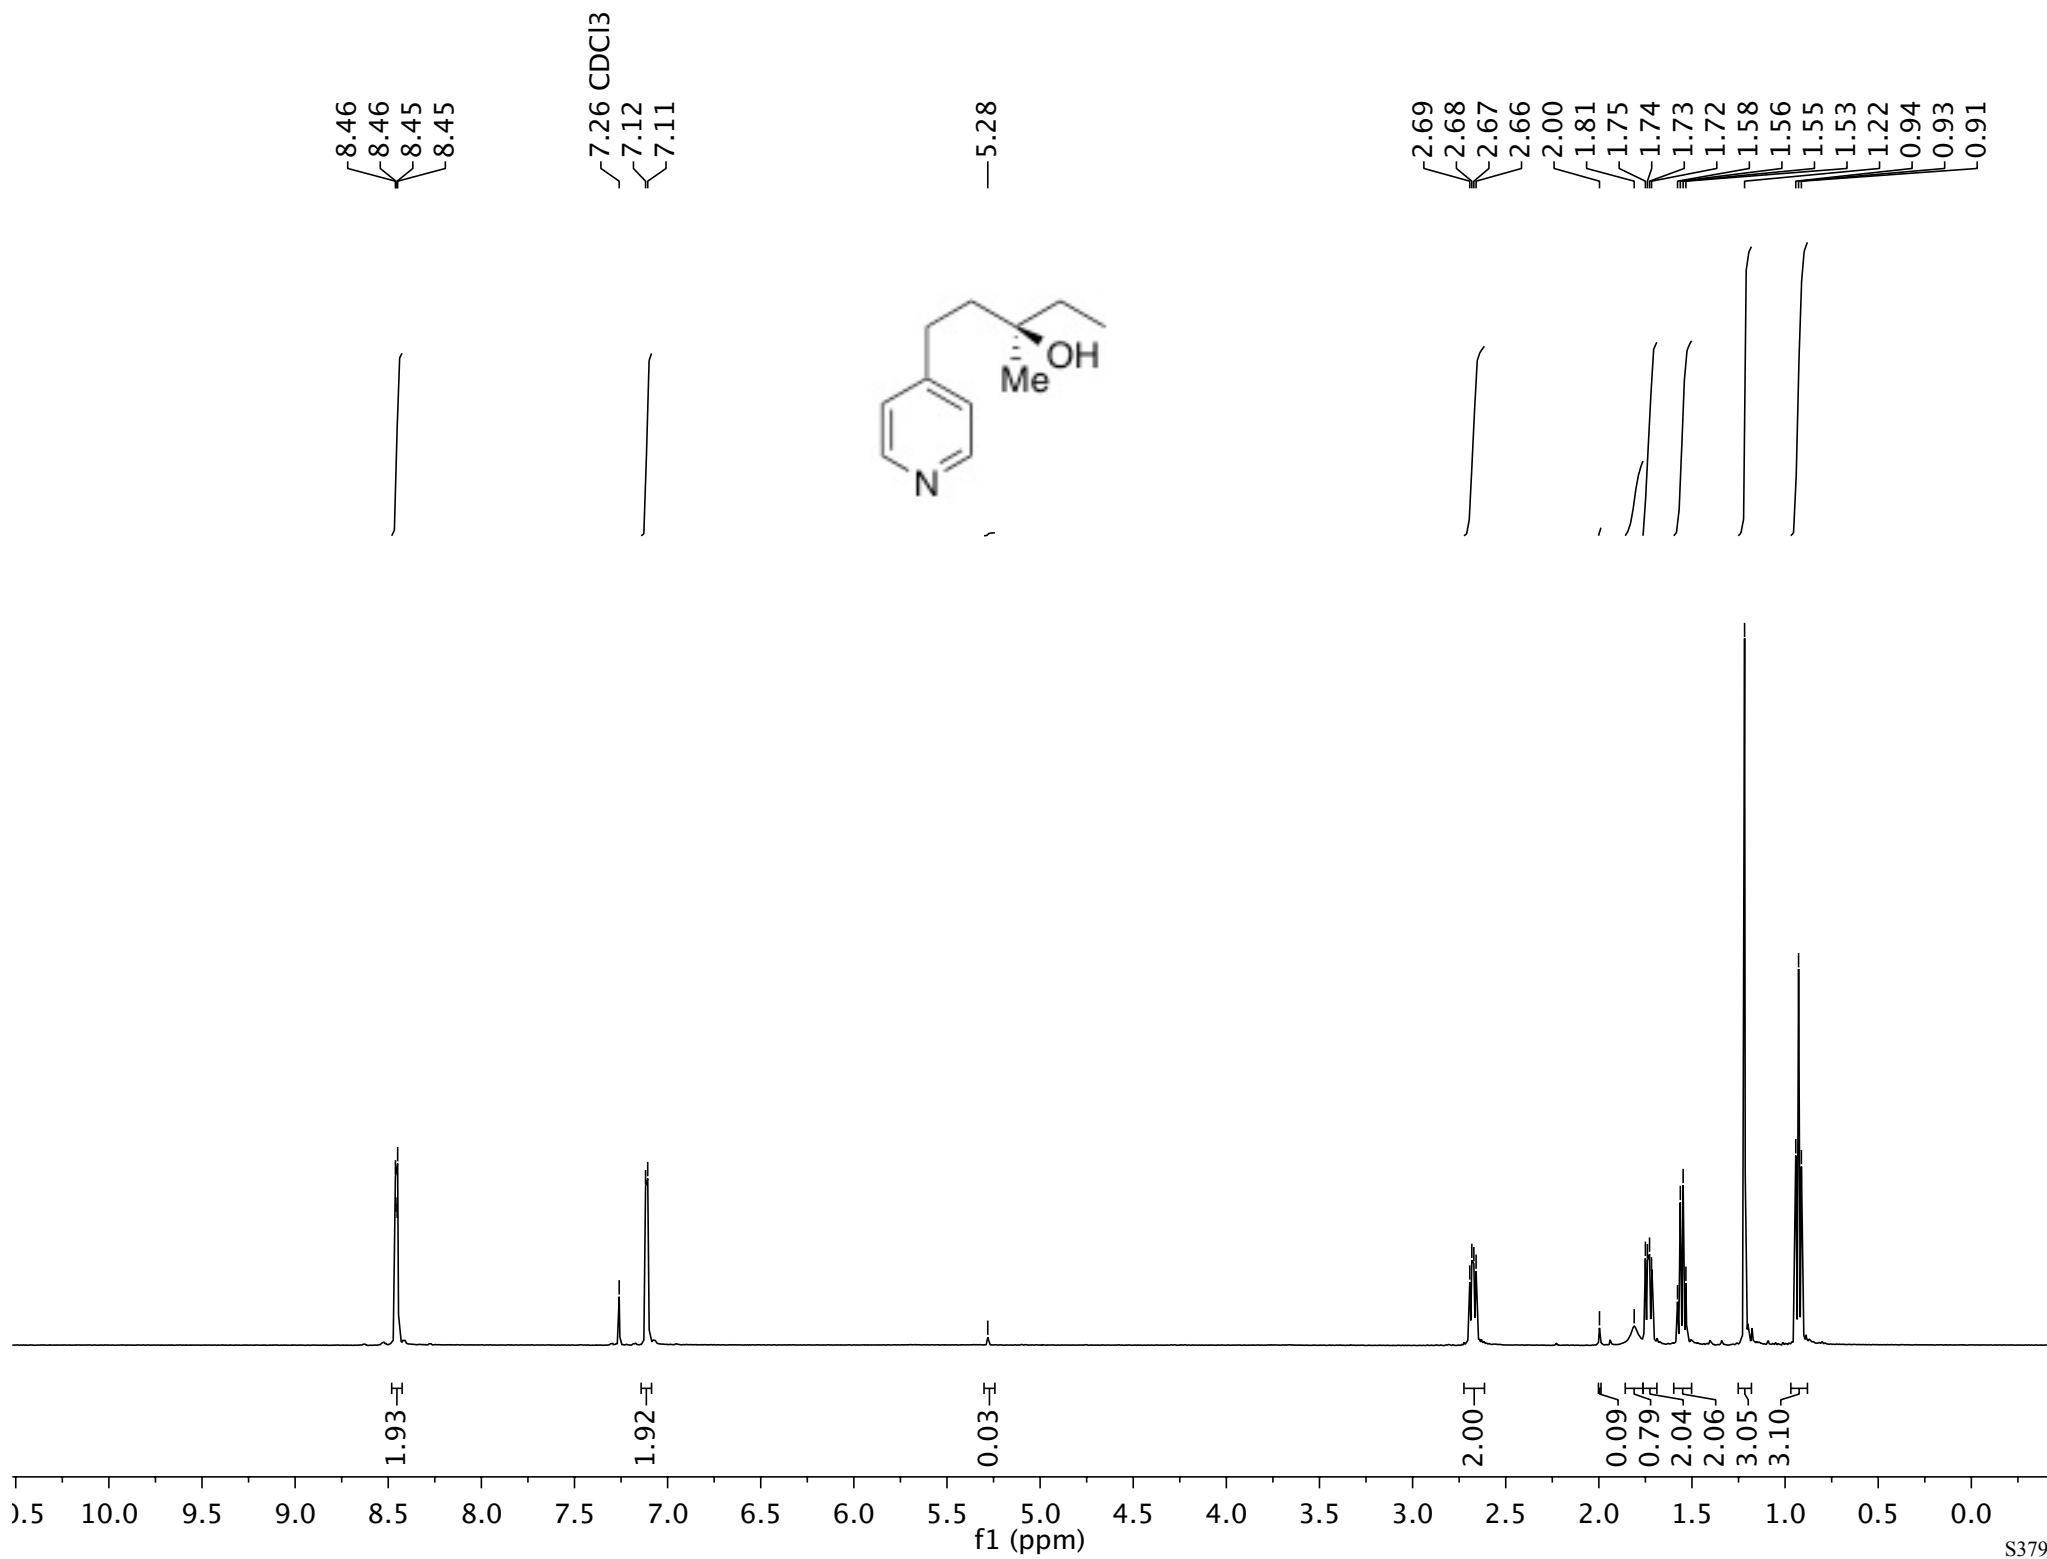

| Parameter              | Value           |
|------------------------|-----------------|
| Origin                 | Varian          |
| Spectrometer           | inova           |
| Solvent                | CDCl3           |
| Temperature            | 20.0            |
| Pulse Sequence         | s2pul           |
| Experiment             | 1D              |
| Probe                  | QUADG           |
| Receiver Gain          | 60              |
| Relaxation Delay       | 1.0000          |
| Pulse Width            | 0.0000          |
| Acquisition Time       | 1.0240          |
| Spectrometer Frequency | 125.60          |
| Spectral Width         | 32000.0         |
| Lowest Frequency       | -2202.4         |
| Nucleus                | <sup>13</sup> C |
| Acquired Size          | 32768           |
| Spectral Size          | 65536           |

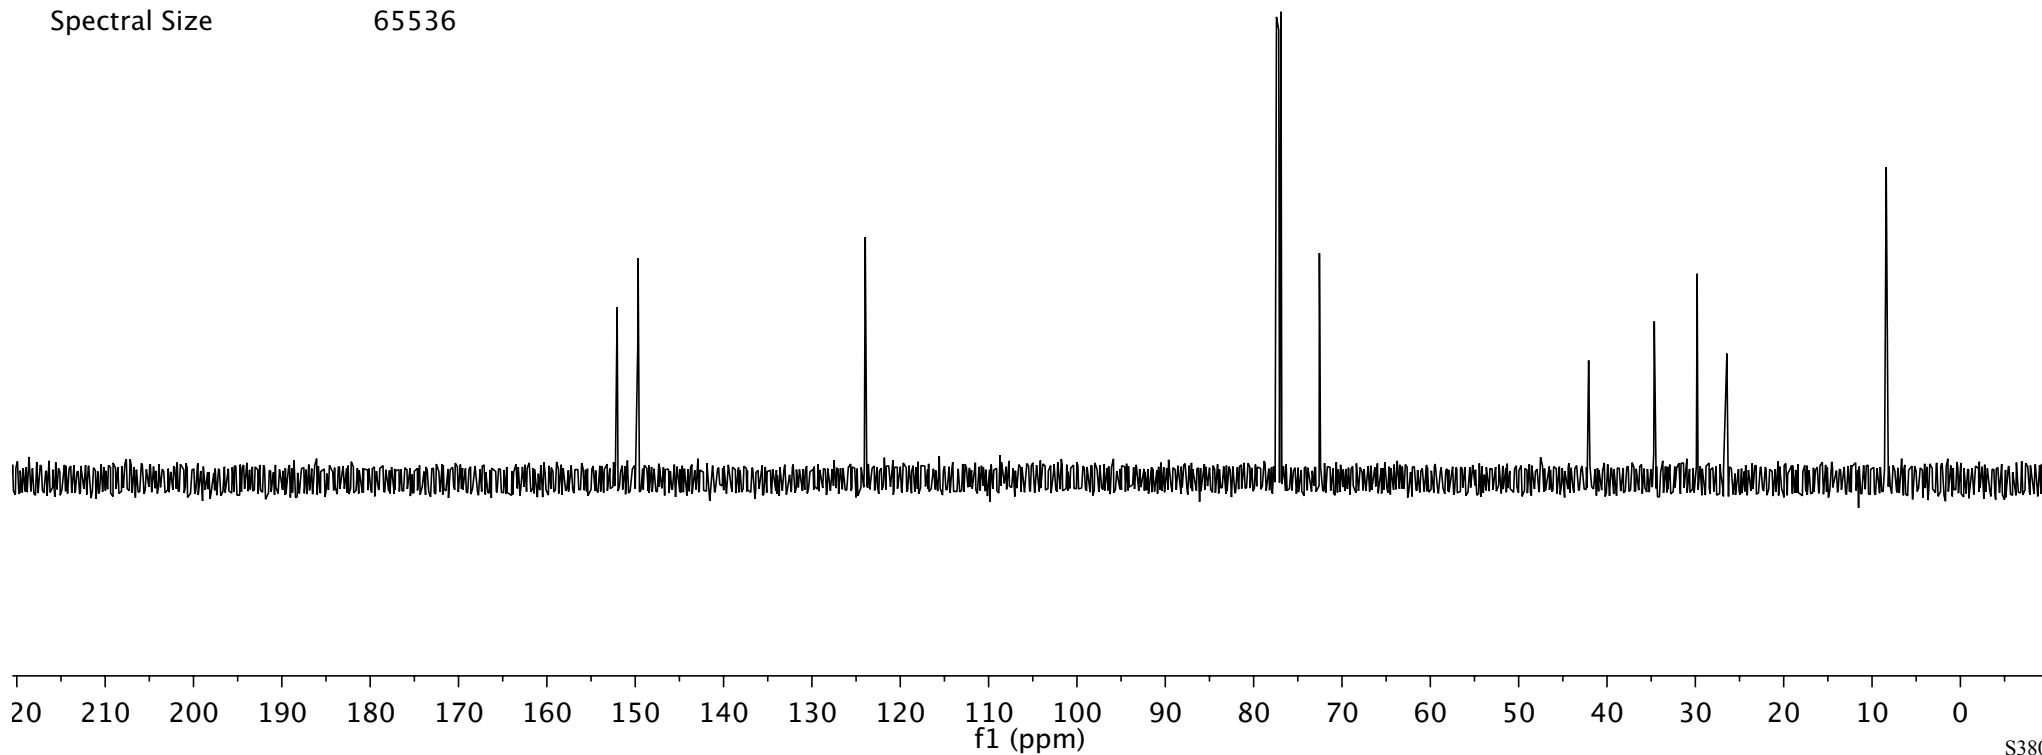

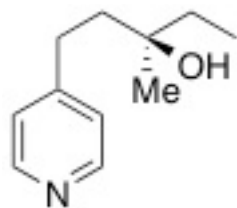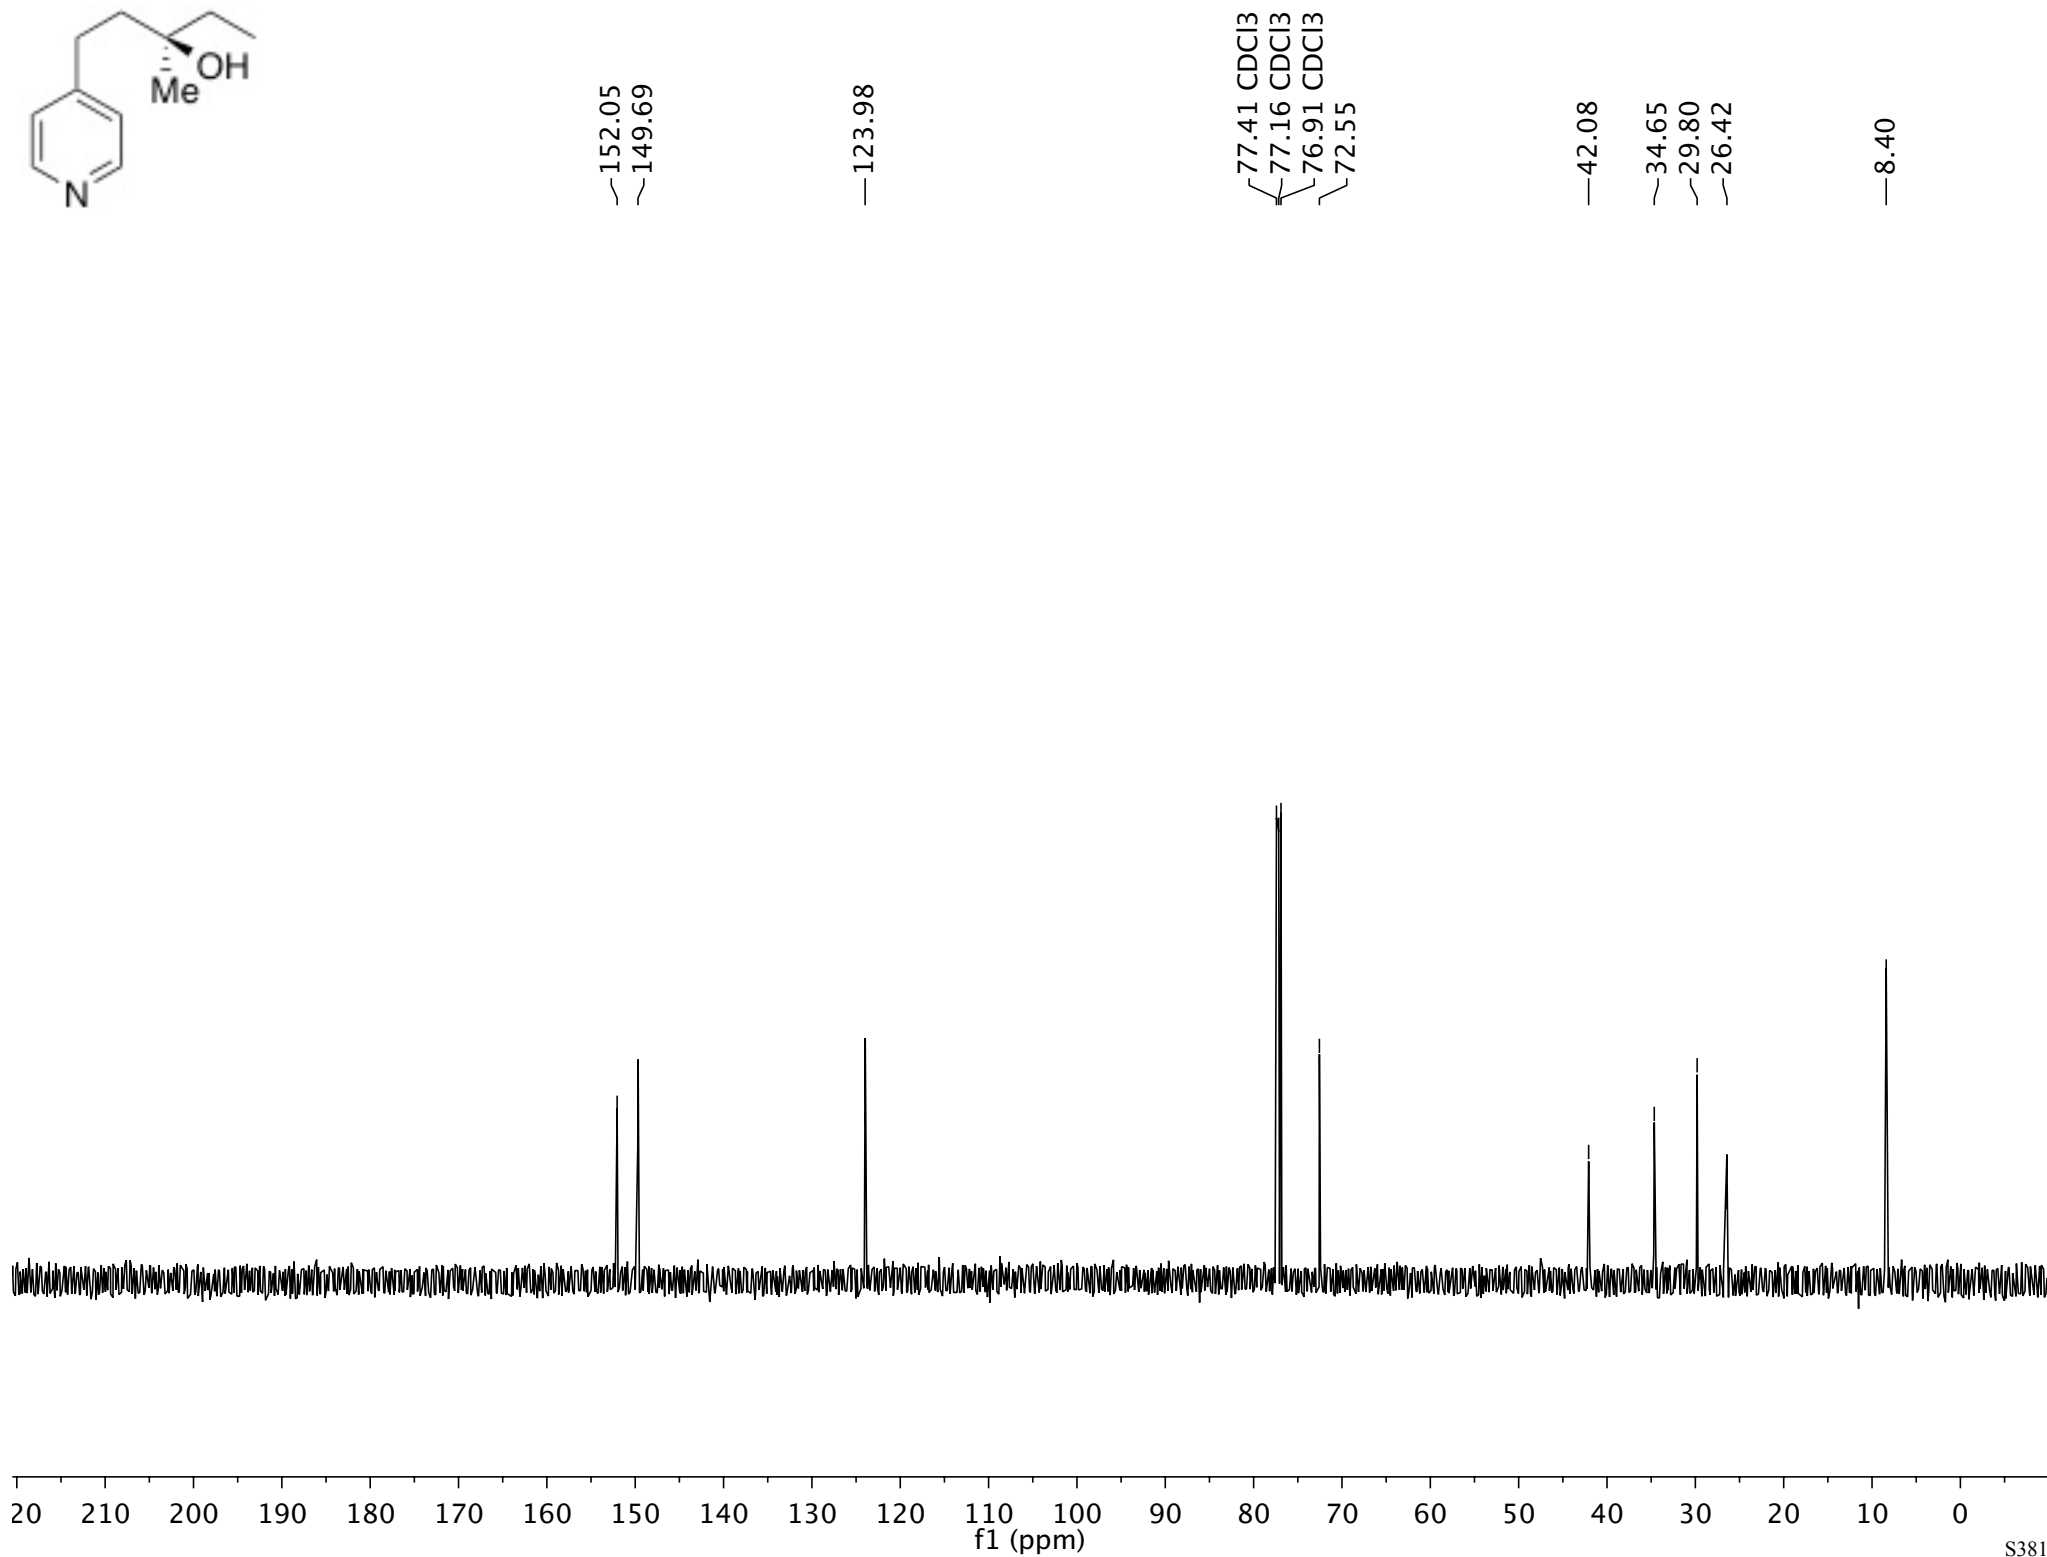

| Parameter              | Value          |
|------------------------|----------------|
| Origin                 | Varian         |
| Spectrometer           | inova          |
| Solvent                | CDCl3          |
| Temperature            | 20.0           |
| Pulse Sequence         | s2pul          |
| Experiment             | 1D             |
| Probe                  | QUADG          |
| Receiver Gain          | 56             |
| Relaxation Delay       | 0.0000         |
| Pulse Width            | 0.0000         |
| Acquisition Time       | 4.0960         |
| Spectrometer Frequency | 499.43         |
| Spectral Width         | 8000.0         |
| Lowest Frequency       | -1508.4        |
| Nucleus                | <sup>1</sup> H |
| Acquired Size          | 32768          |
| Spectral Size          | 65536          |

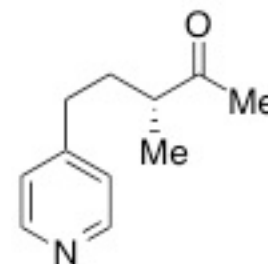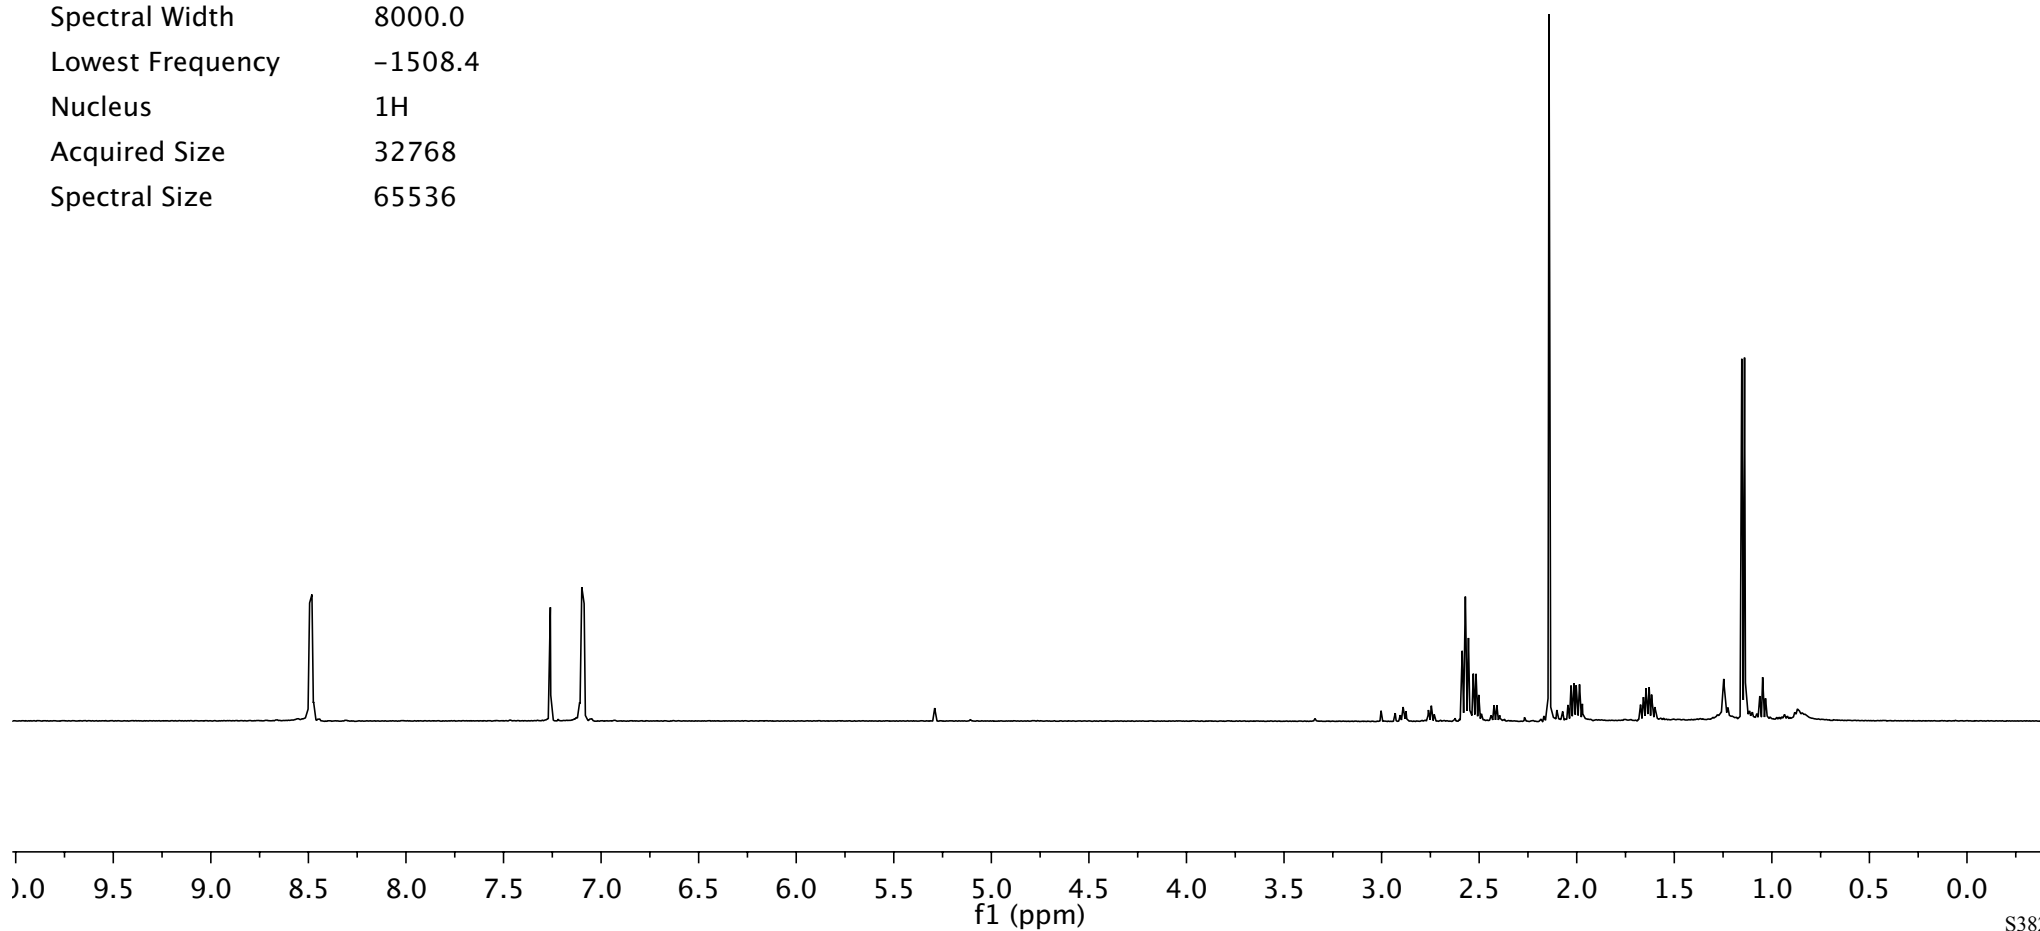

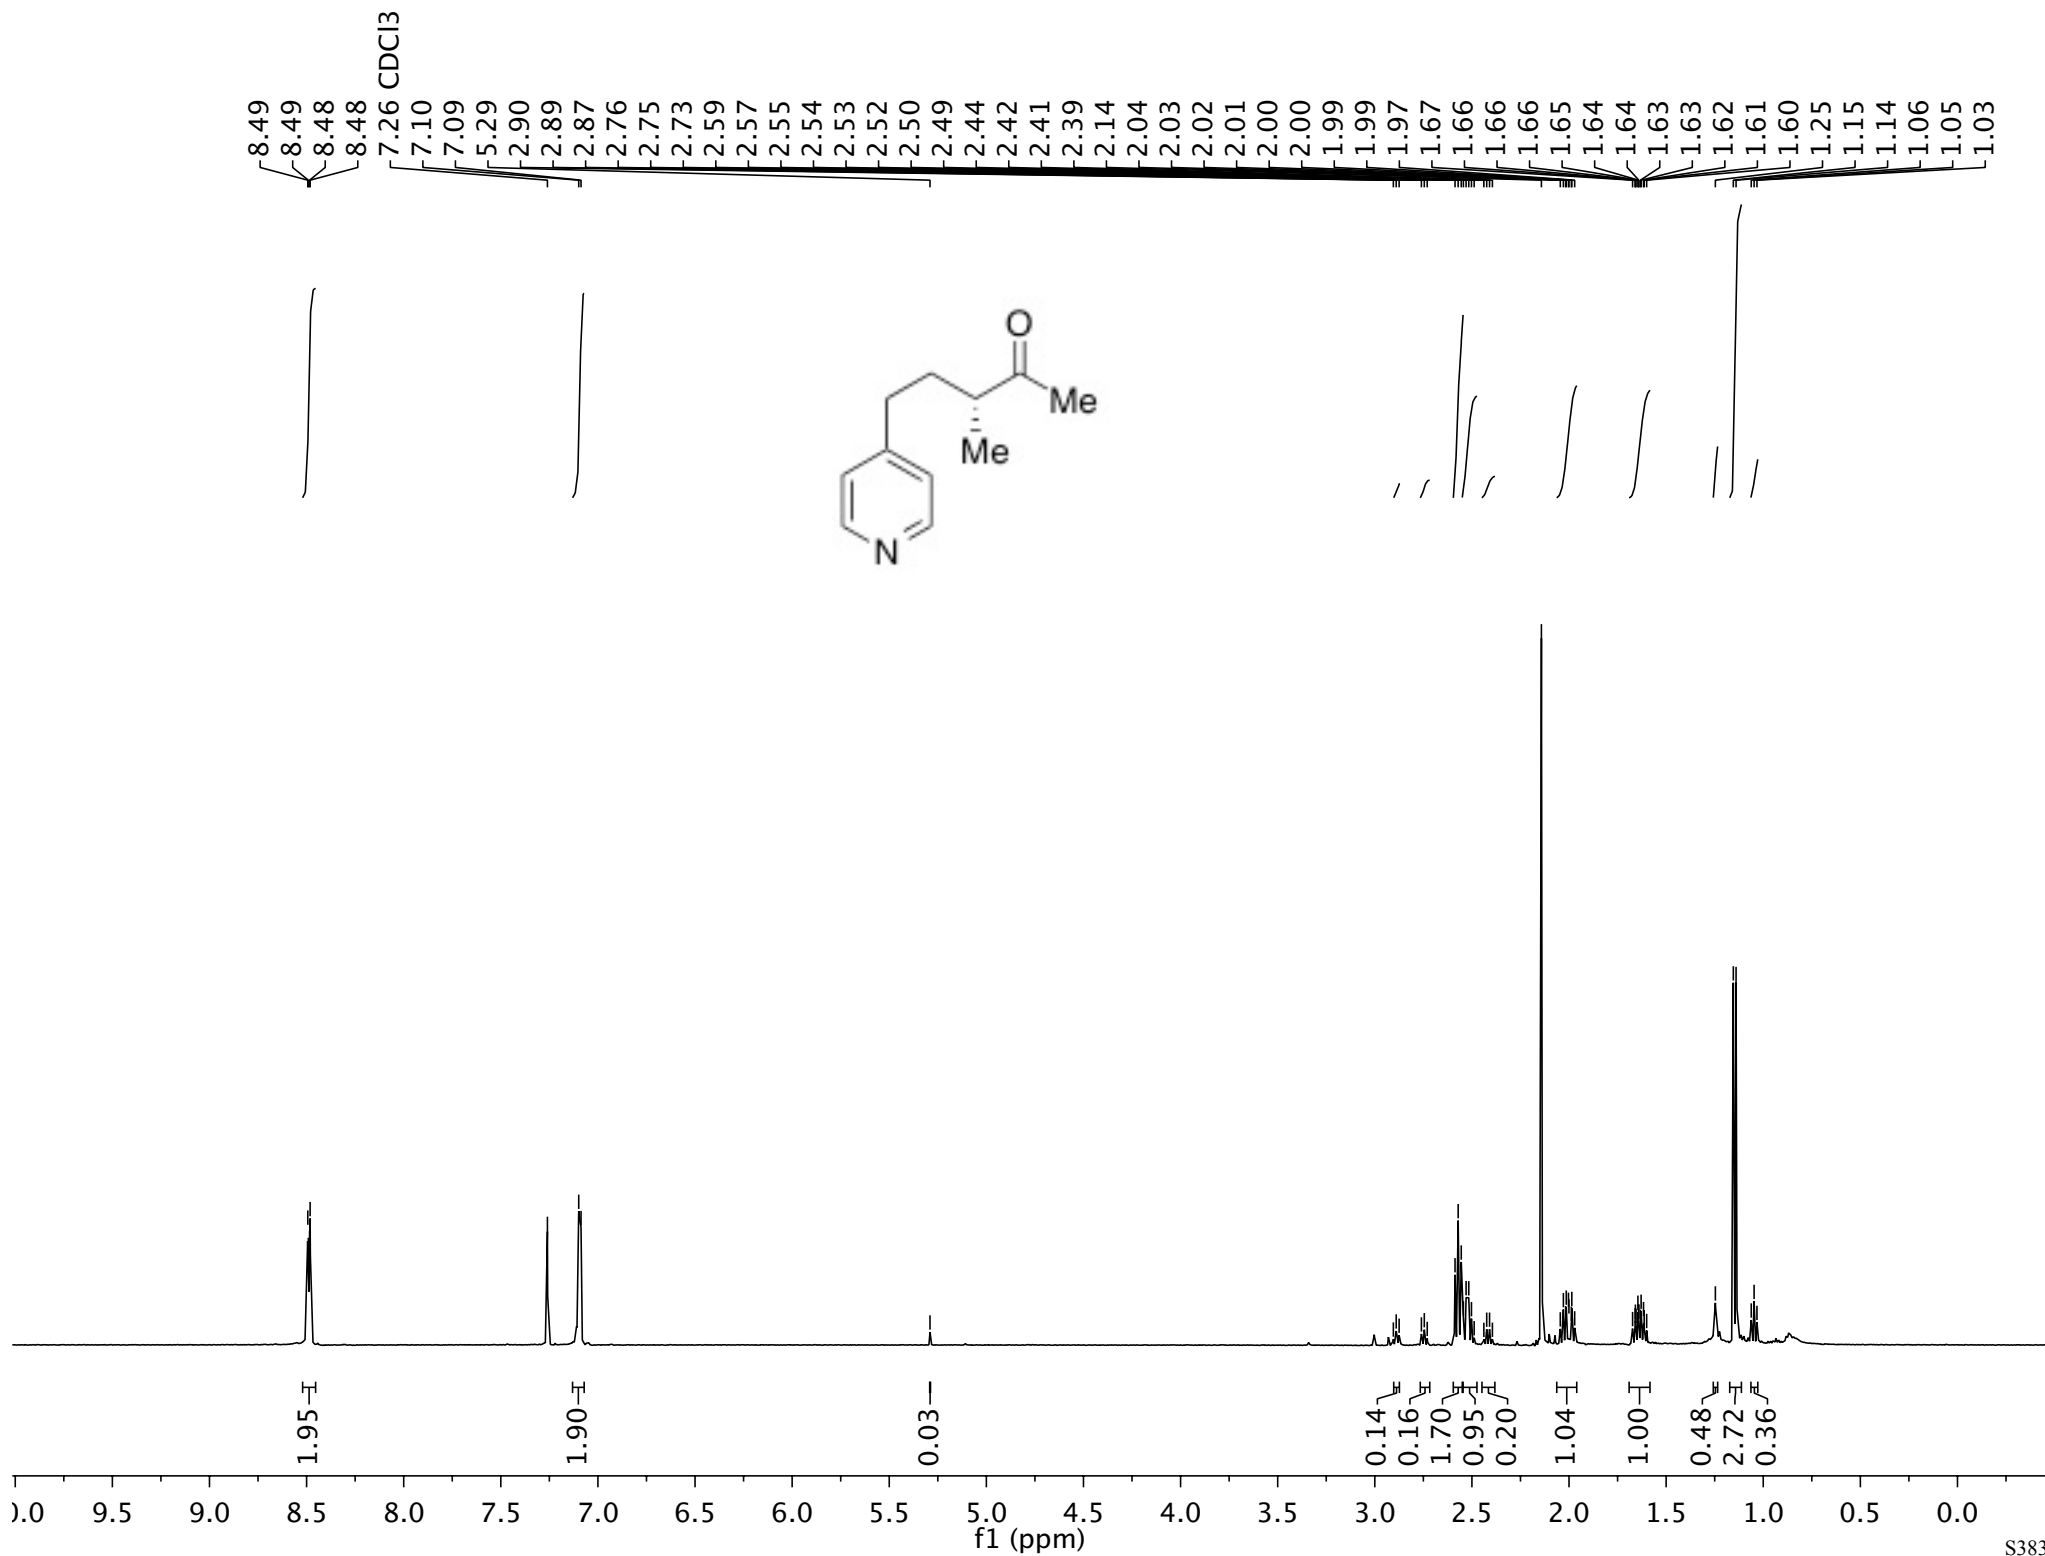



| Parameter              | Value           |
|------------------------|-----------------|
| Origin                 | Varian          |
| Spectrometer           | inova           |
| Solvent                | CDCl3           |
| Temperature            | 20.0            |
| Pulse Sequence         | s2pul           |
| Experiment             | 1D              |
| Probe                  | QUADG           |
| Receiver Gain          | 60              |
| Relaxation Delay       | 1.0000          |
| Pulse Width            | 0.0000          |
| Acquisition Time       | 1.0240          |
| Spectrometer Frequency | 125.60          |
| Spectral Width         | 32000.0         |
| Lowest Frequency       | -2207.0         |
| Nucleus                | <sup>13</sup> C |
| Acquired Size          | 32768           |
| Spectral Size          | 65536           |

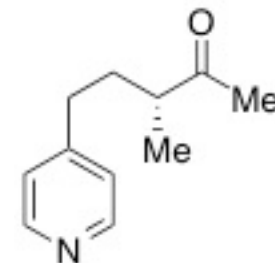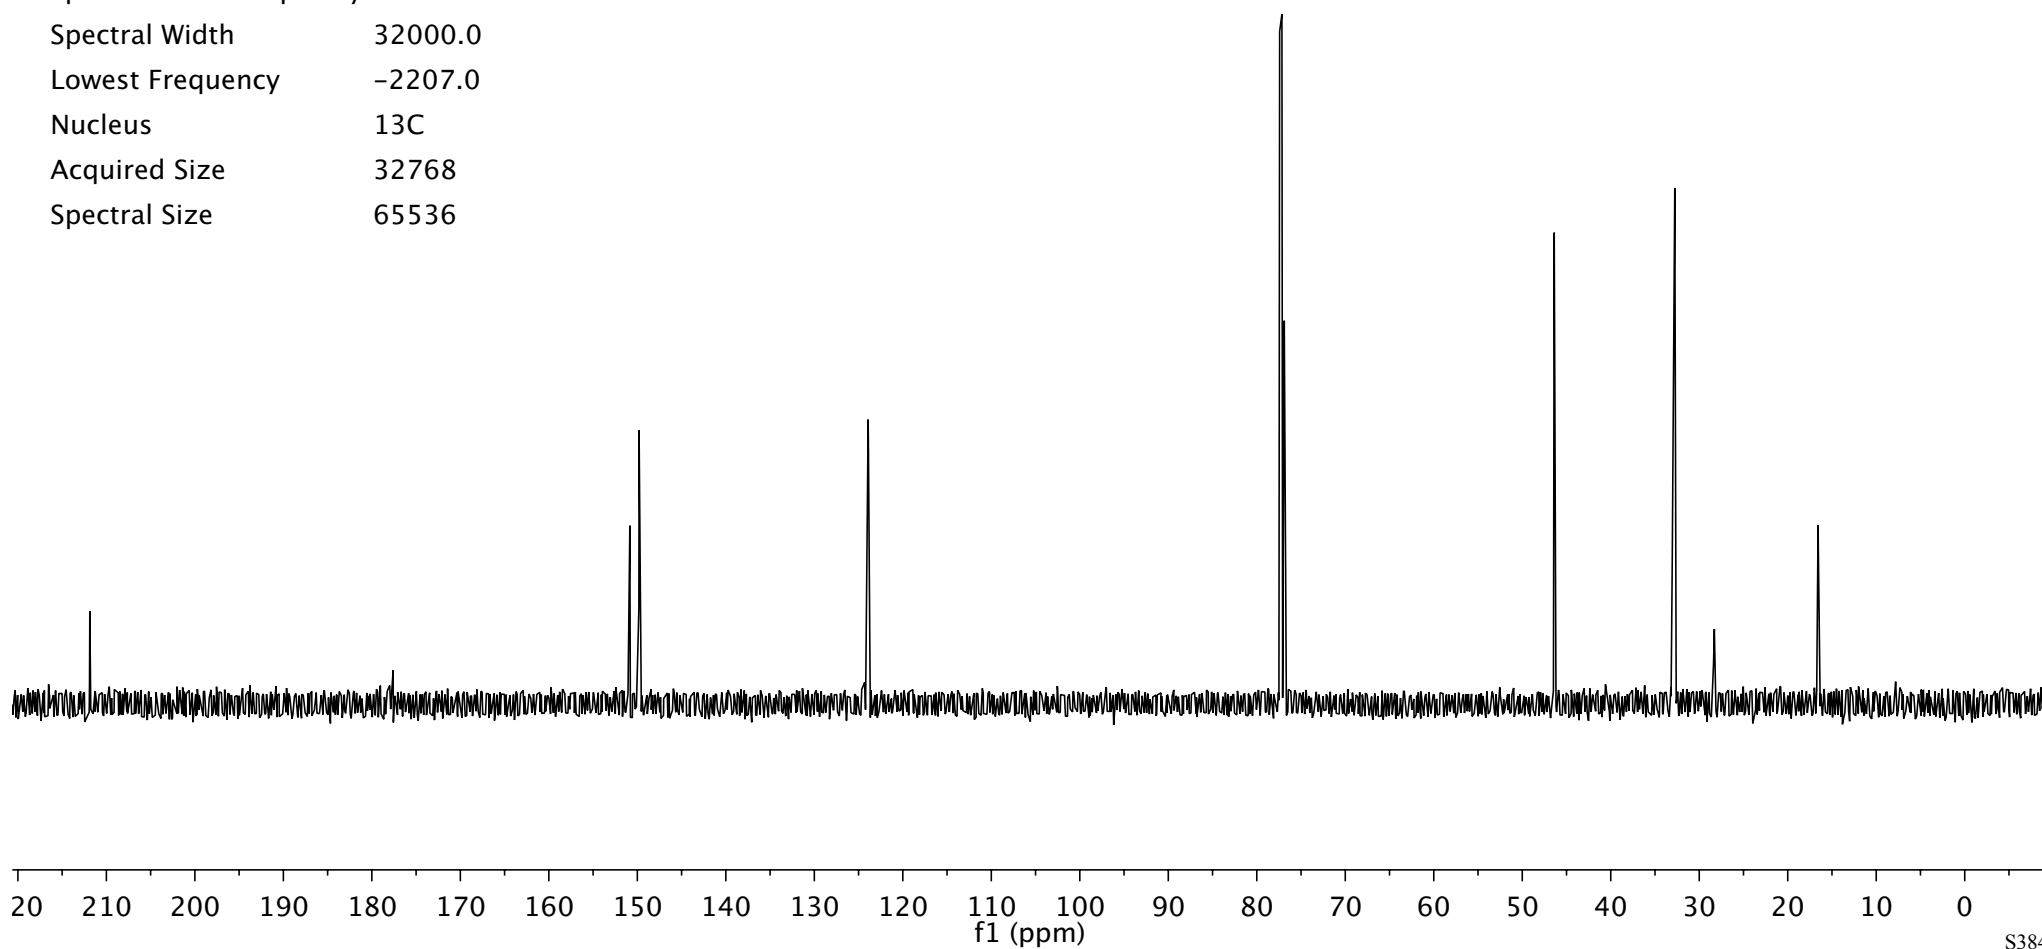

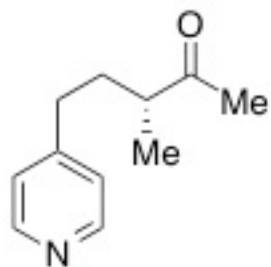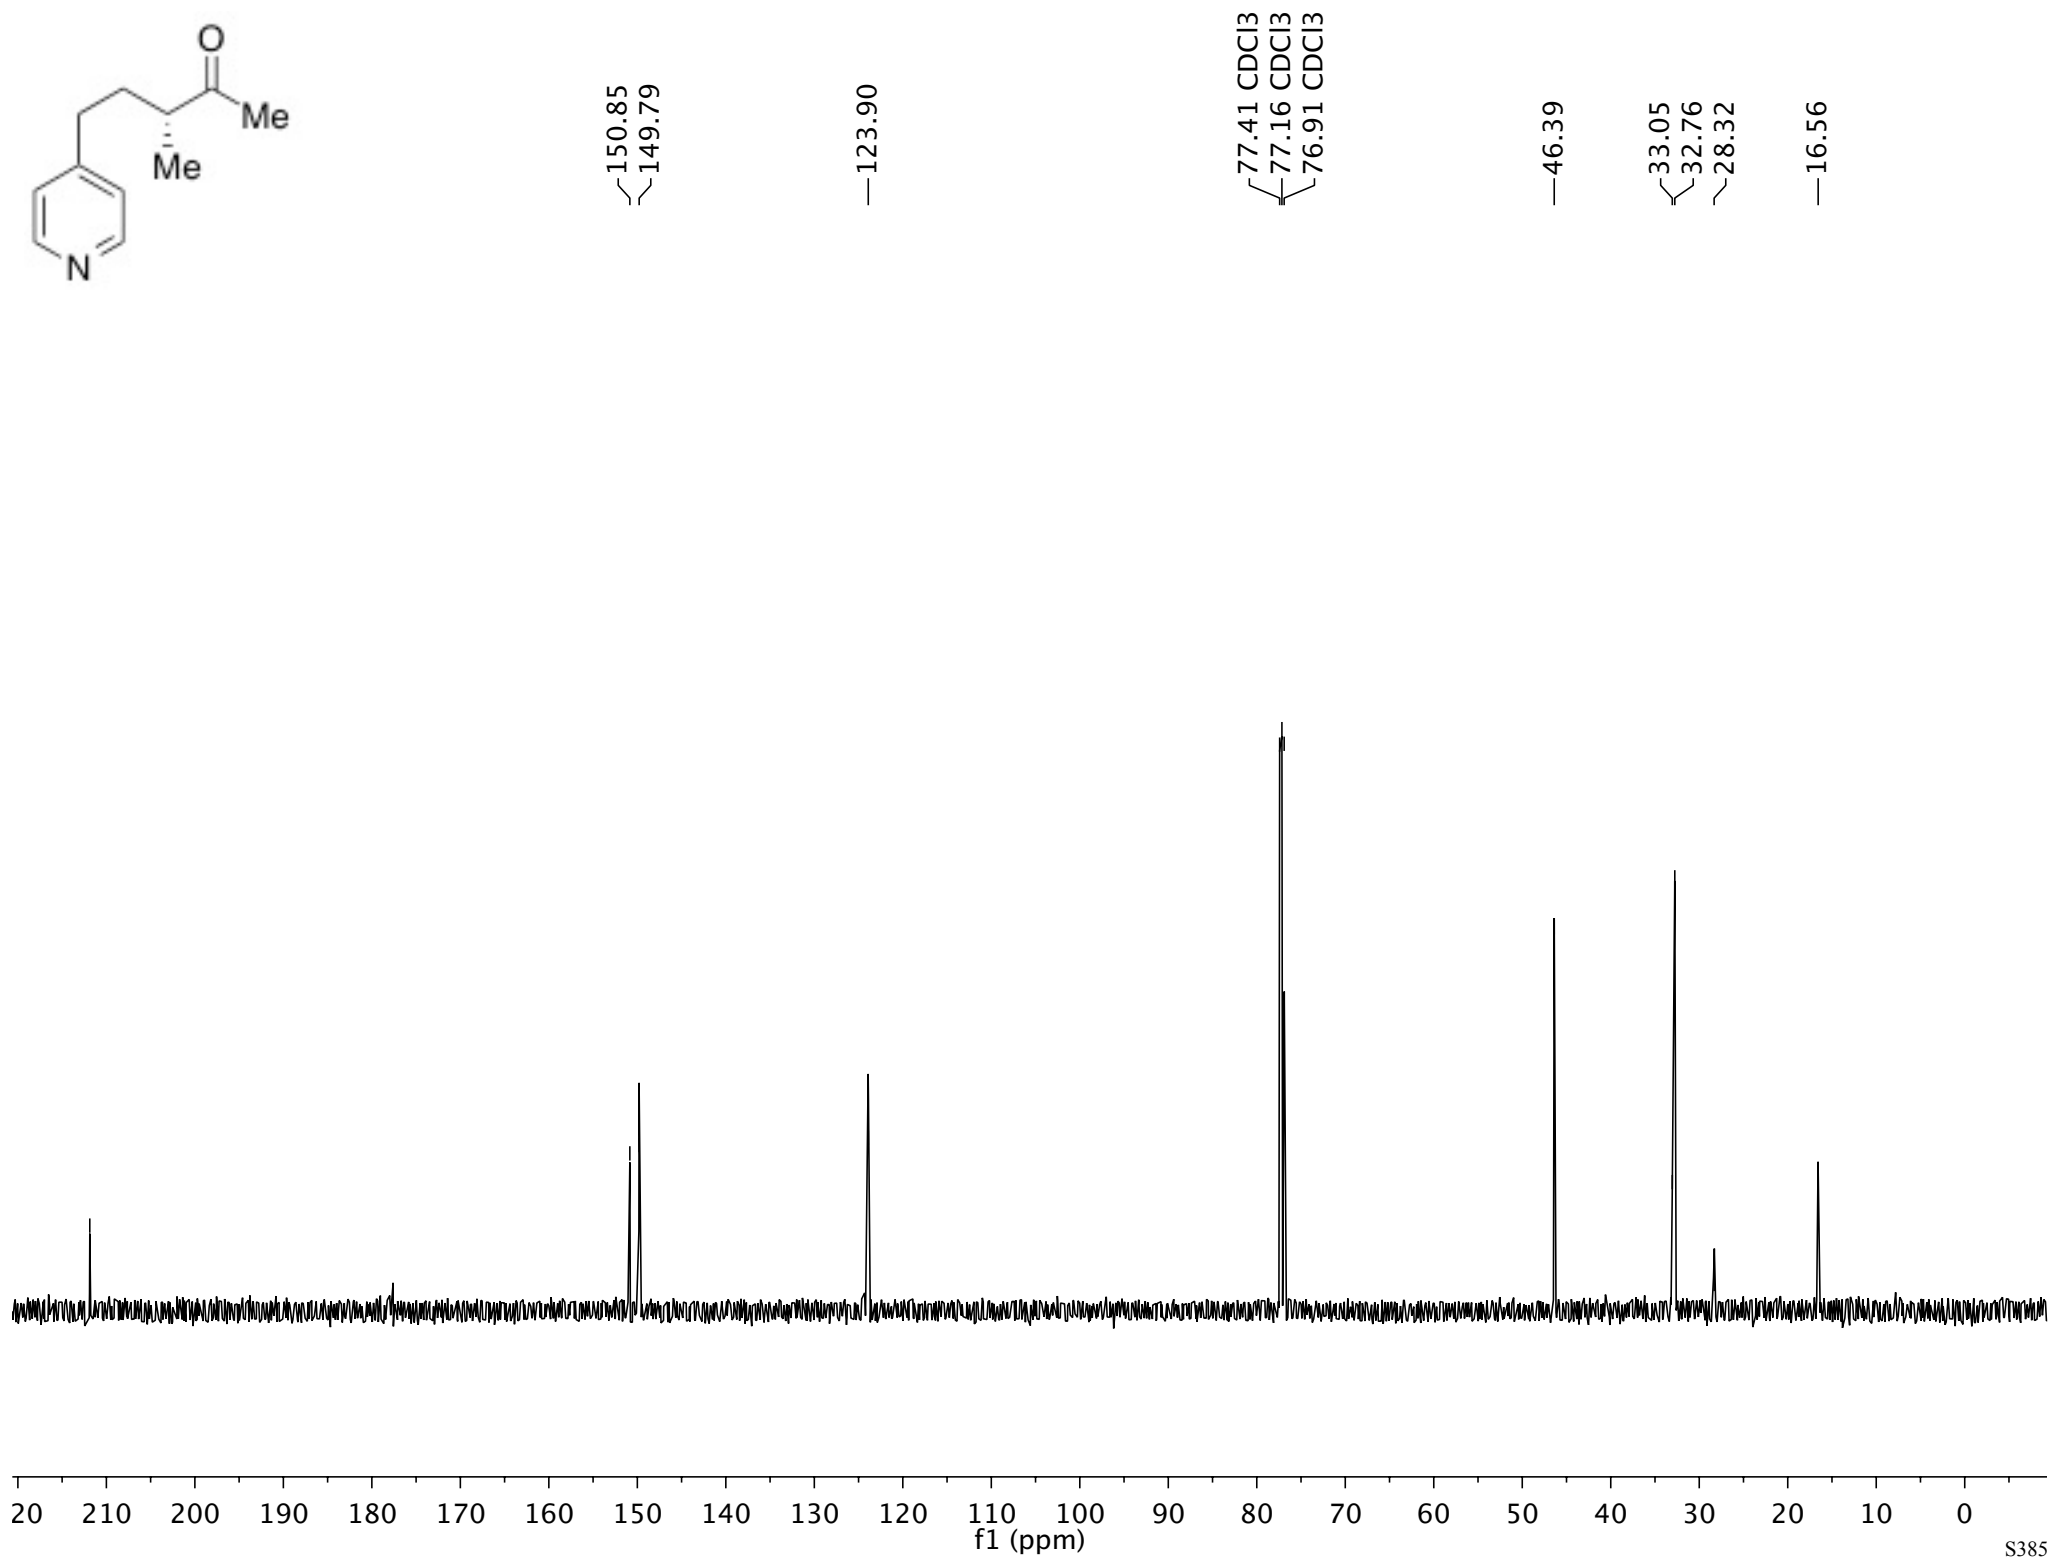

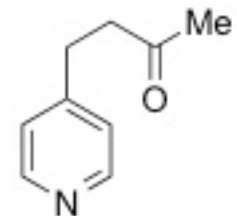

| Parameter              | Value          |
|------------------------|----------------|
| Origin                 | Varian         |
| Spectrometer           | inova          |
| Solvent                | CDCl3          |
| Temperature            | 20.0           |
| Pulse Sequence         | s2pul          |
| Experiment             | 1D             |
| Probe                  | hcn            |
| Receiver Gain          | 32             |
| Relaxation Delay       | 10.0000        |
| Pulse Width            | 0.0000         |
| Acquisition Time       | 4.0960         |
| Spectrometer Frequency | 500.07         |
| Spectral Width         | 8000.0         |
| Lowest Frequency       | -1520.9        |
| Nucleus                | <sup>1</sup> H |
| Acquired Size          | 32768          |
| Spectral Size          | 65536          |

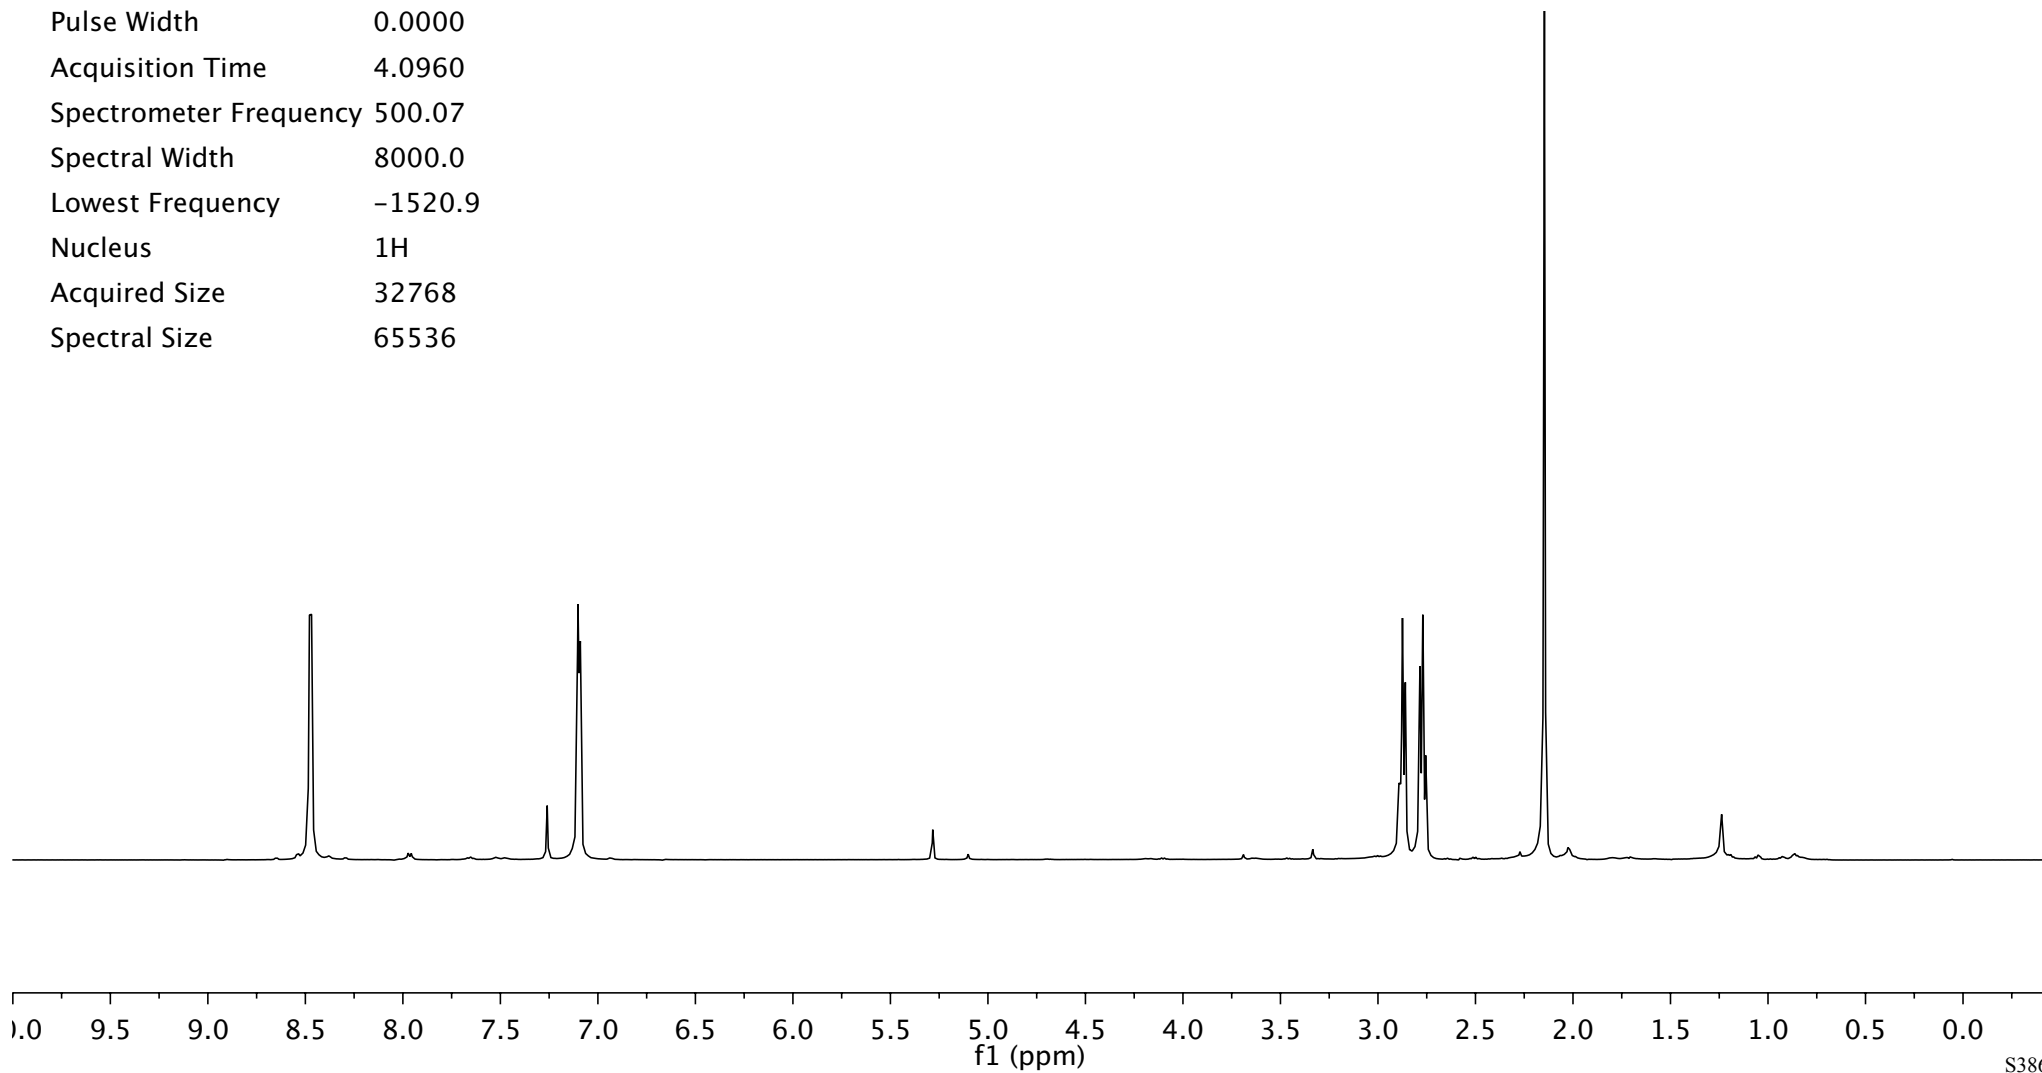

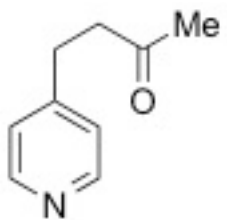

8.48  
8.47

7.97  
7.96

7.26 CDCl<sub>3</sub>

7.10  
7.09

5.28

2.89

2.87

2.86

2.78

2.77

2.76

2.15

1.24

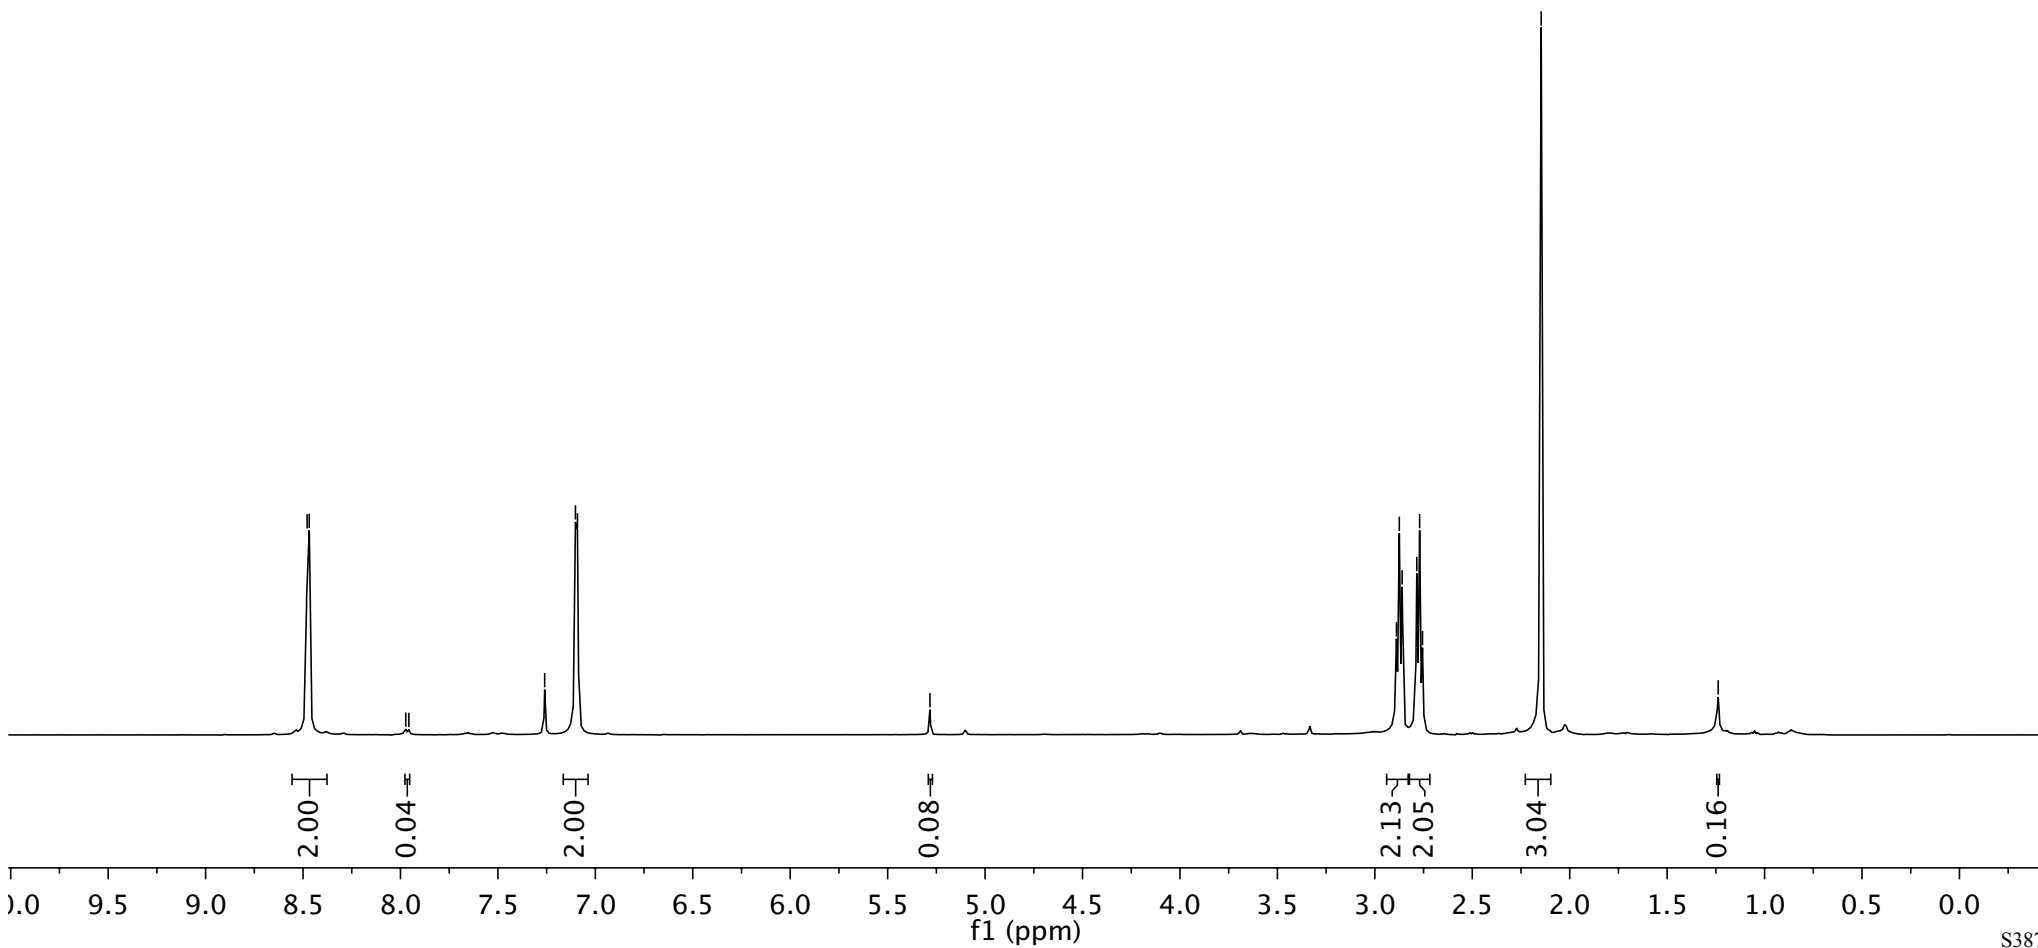

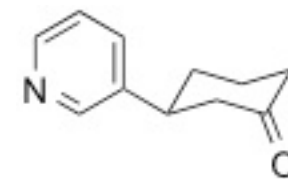

| Parameter              | Value   |
|------------------------|---------|
| Origin                 | Varian  |
| Spectrometer           | inova   |
| Solvent                | CDCl3   |
| Temperature            | 25.0    |
| Pulse Sequence         | s2pul   |
| Experiment             | 1D      |
| Probe                  | hcn     |
| Receiver Gain          | 48      |
| Relaxation Delay       | 0.0000  |
| Pulse Width            | 0.0000  |
| Acquisition Time       | 4.0960  |
| Spectrometer Frequency | 500.07  |
| Spectral Width         | 8000.0  |
| Lowest Frequency       | -1520.9 |
| Nucleus                | 1H      |
| Acquired Size          | 32768   |
| Spectral Size          | 65536   |

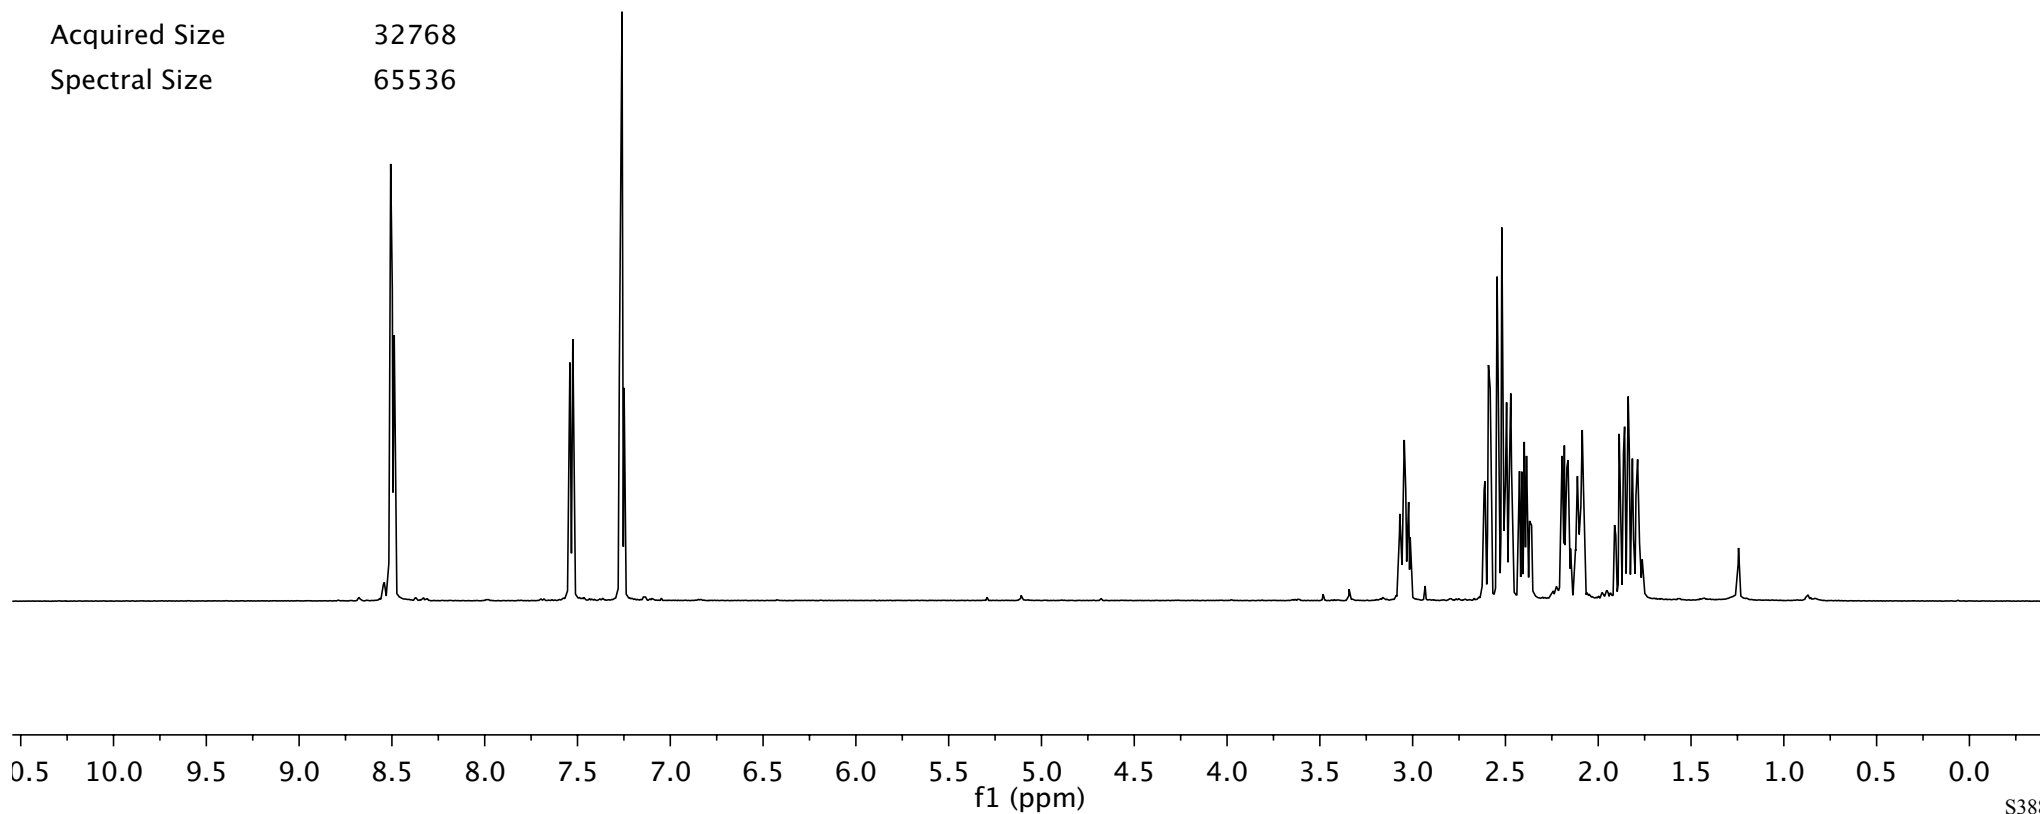

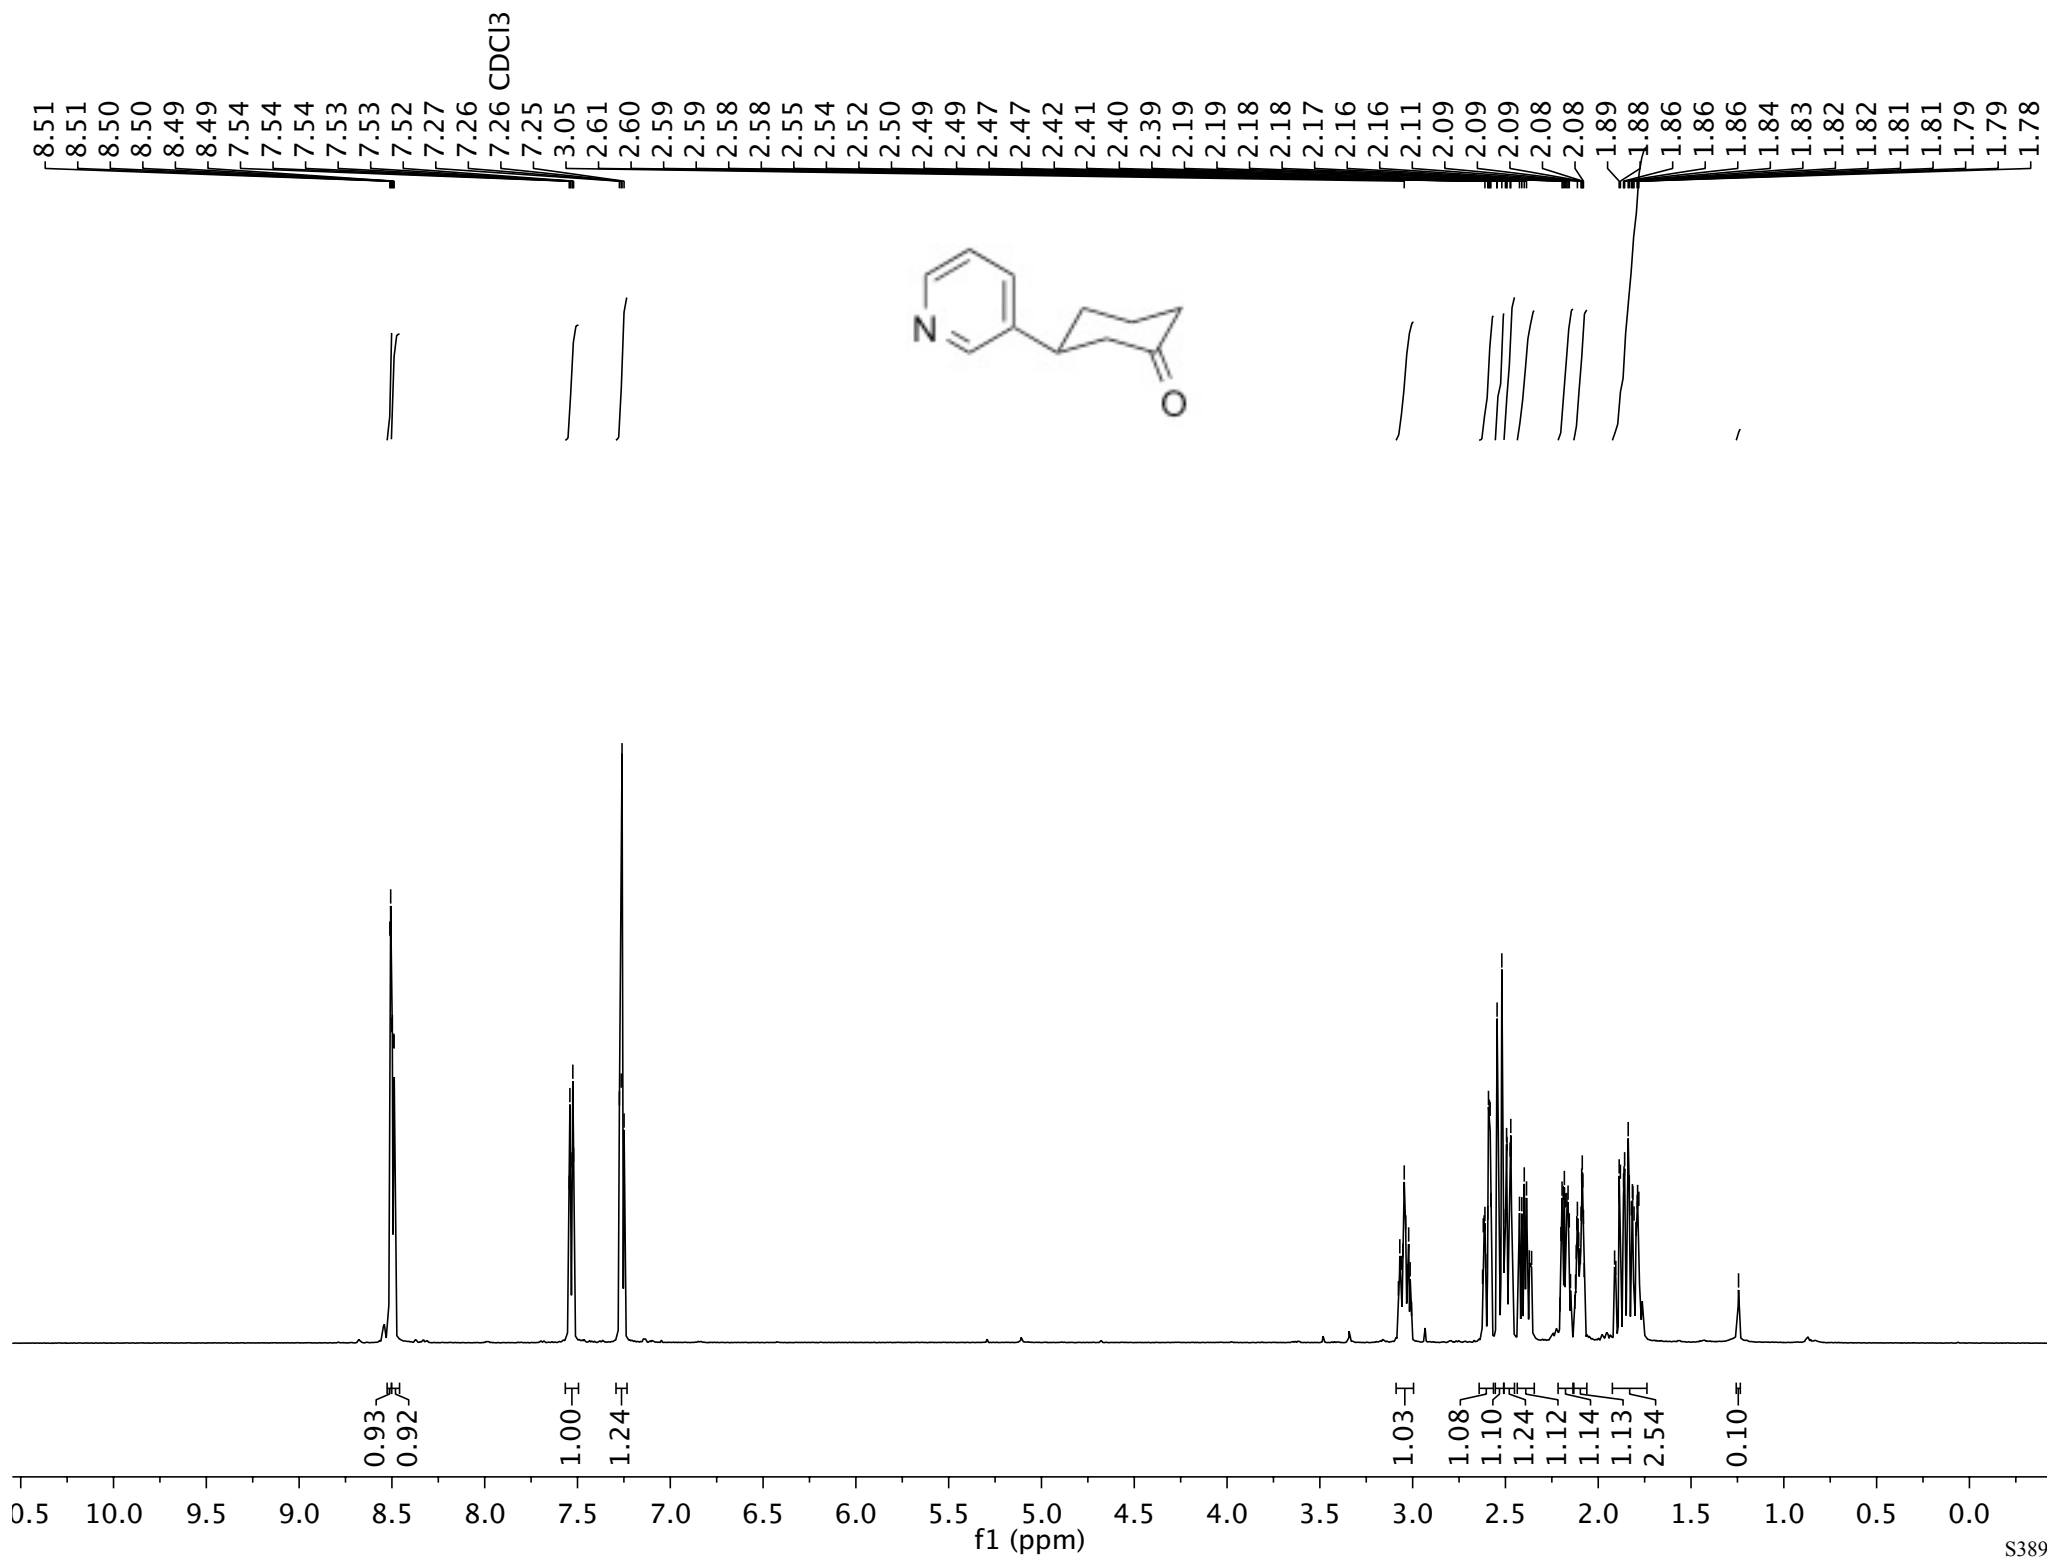

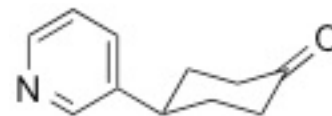

| Parameter              | Value          |
|------------------------|----------------|
| Origin                 | Varian         |
| Spectrometer           | inova          |
| Solvent                | CDCl3          |
| Temperature            | 25.0           |
| Pulse Sequence         | s2pul          |
| Experiment             | 1D             |
| Probe                  | hcn            |
| Receiver Gain          | 60             |
| Relaxation Delay       | 0.0000         |
| Pulse Width            | 0.0000         |
| Acquisition Time       | 4.0960         |
| Spectrometer Frequency | 500.07         |
| Spectral Width         | 8000.0         |
| Lowest Frequency       | -1520.6        |
| Nucleus                | <sup>1</sup> H |
| Acquired Size          | 32768          |
| Spectral Size          | 65536          |

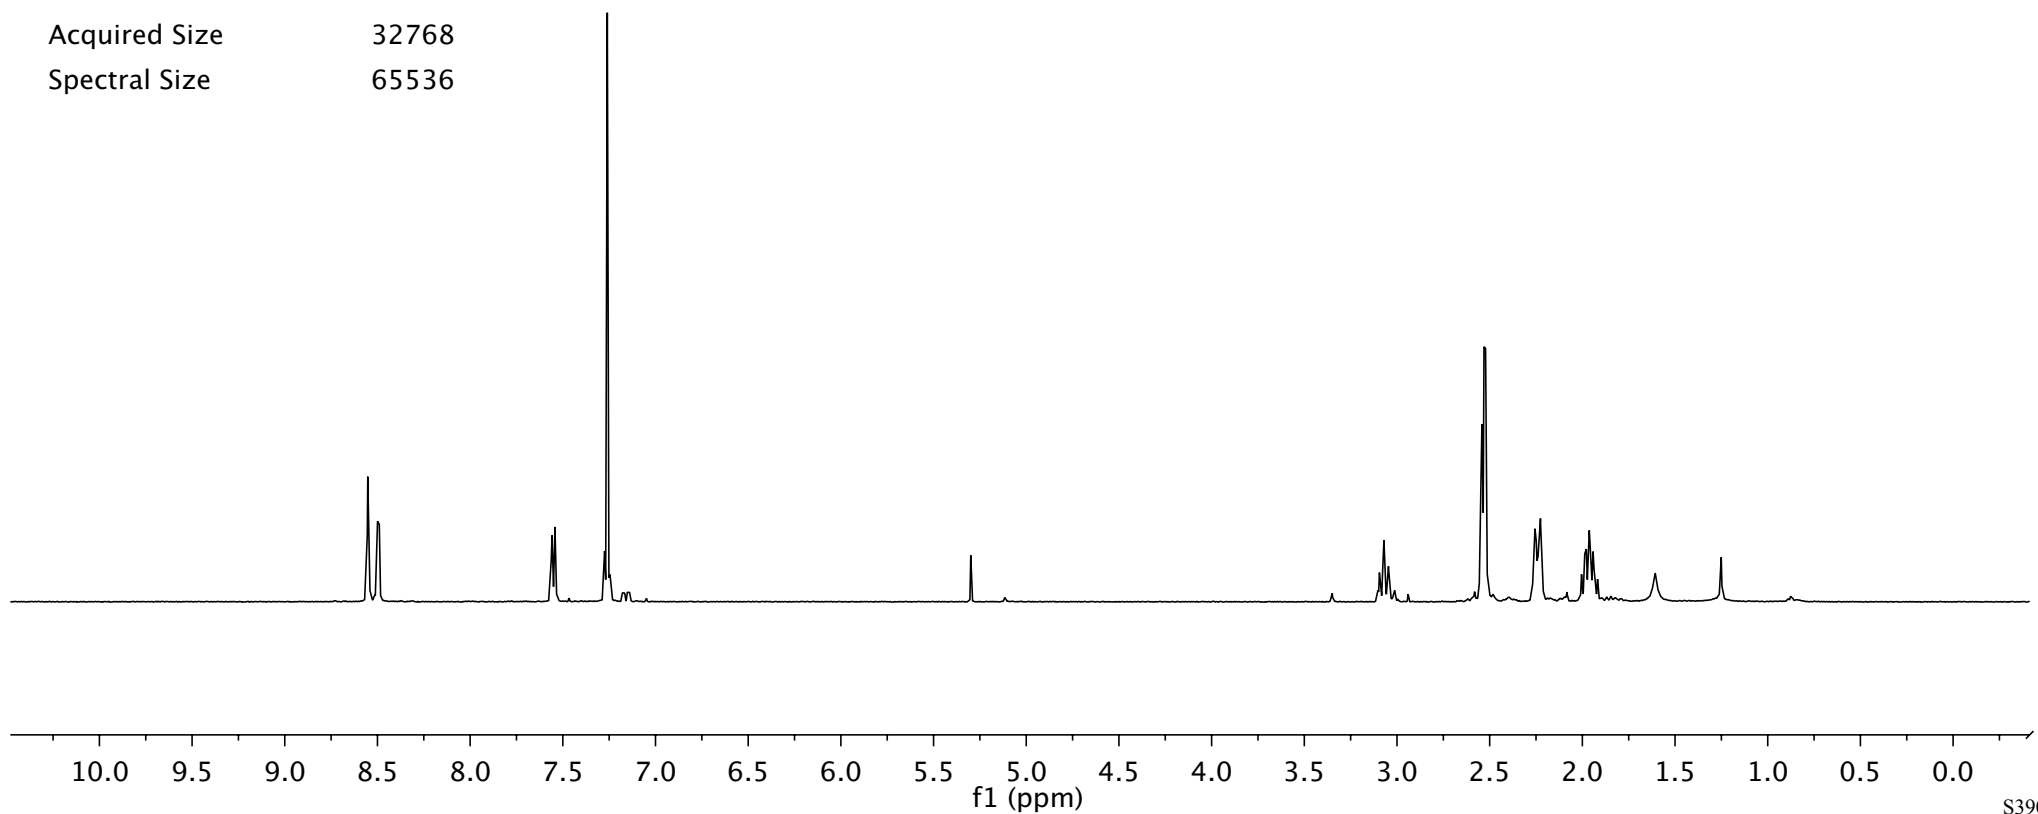

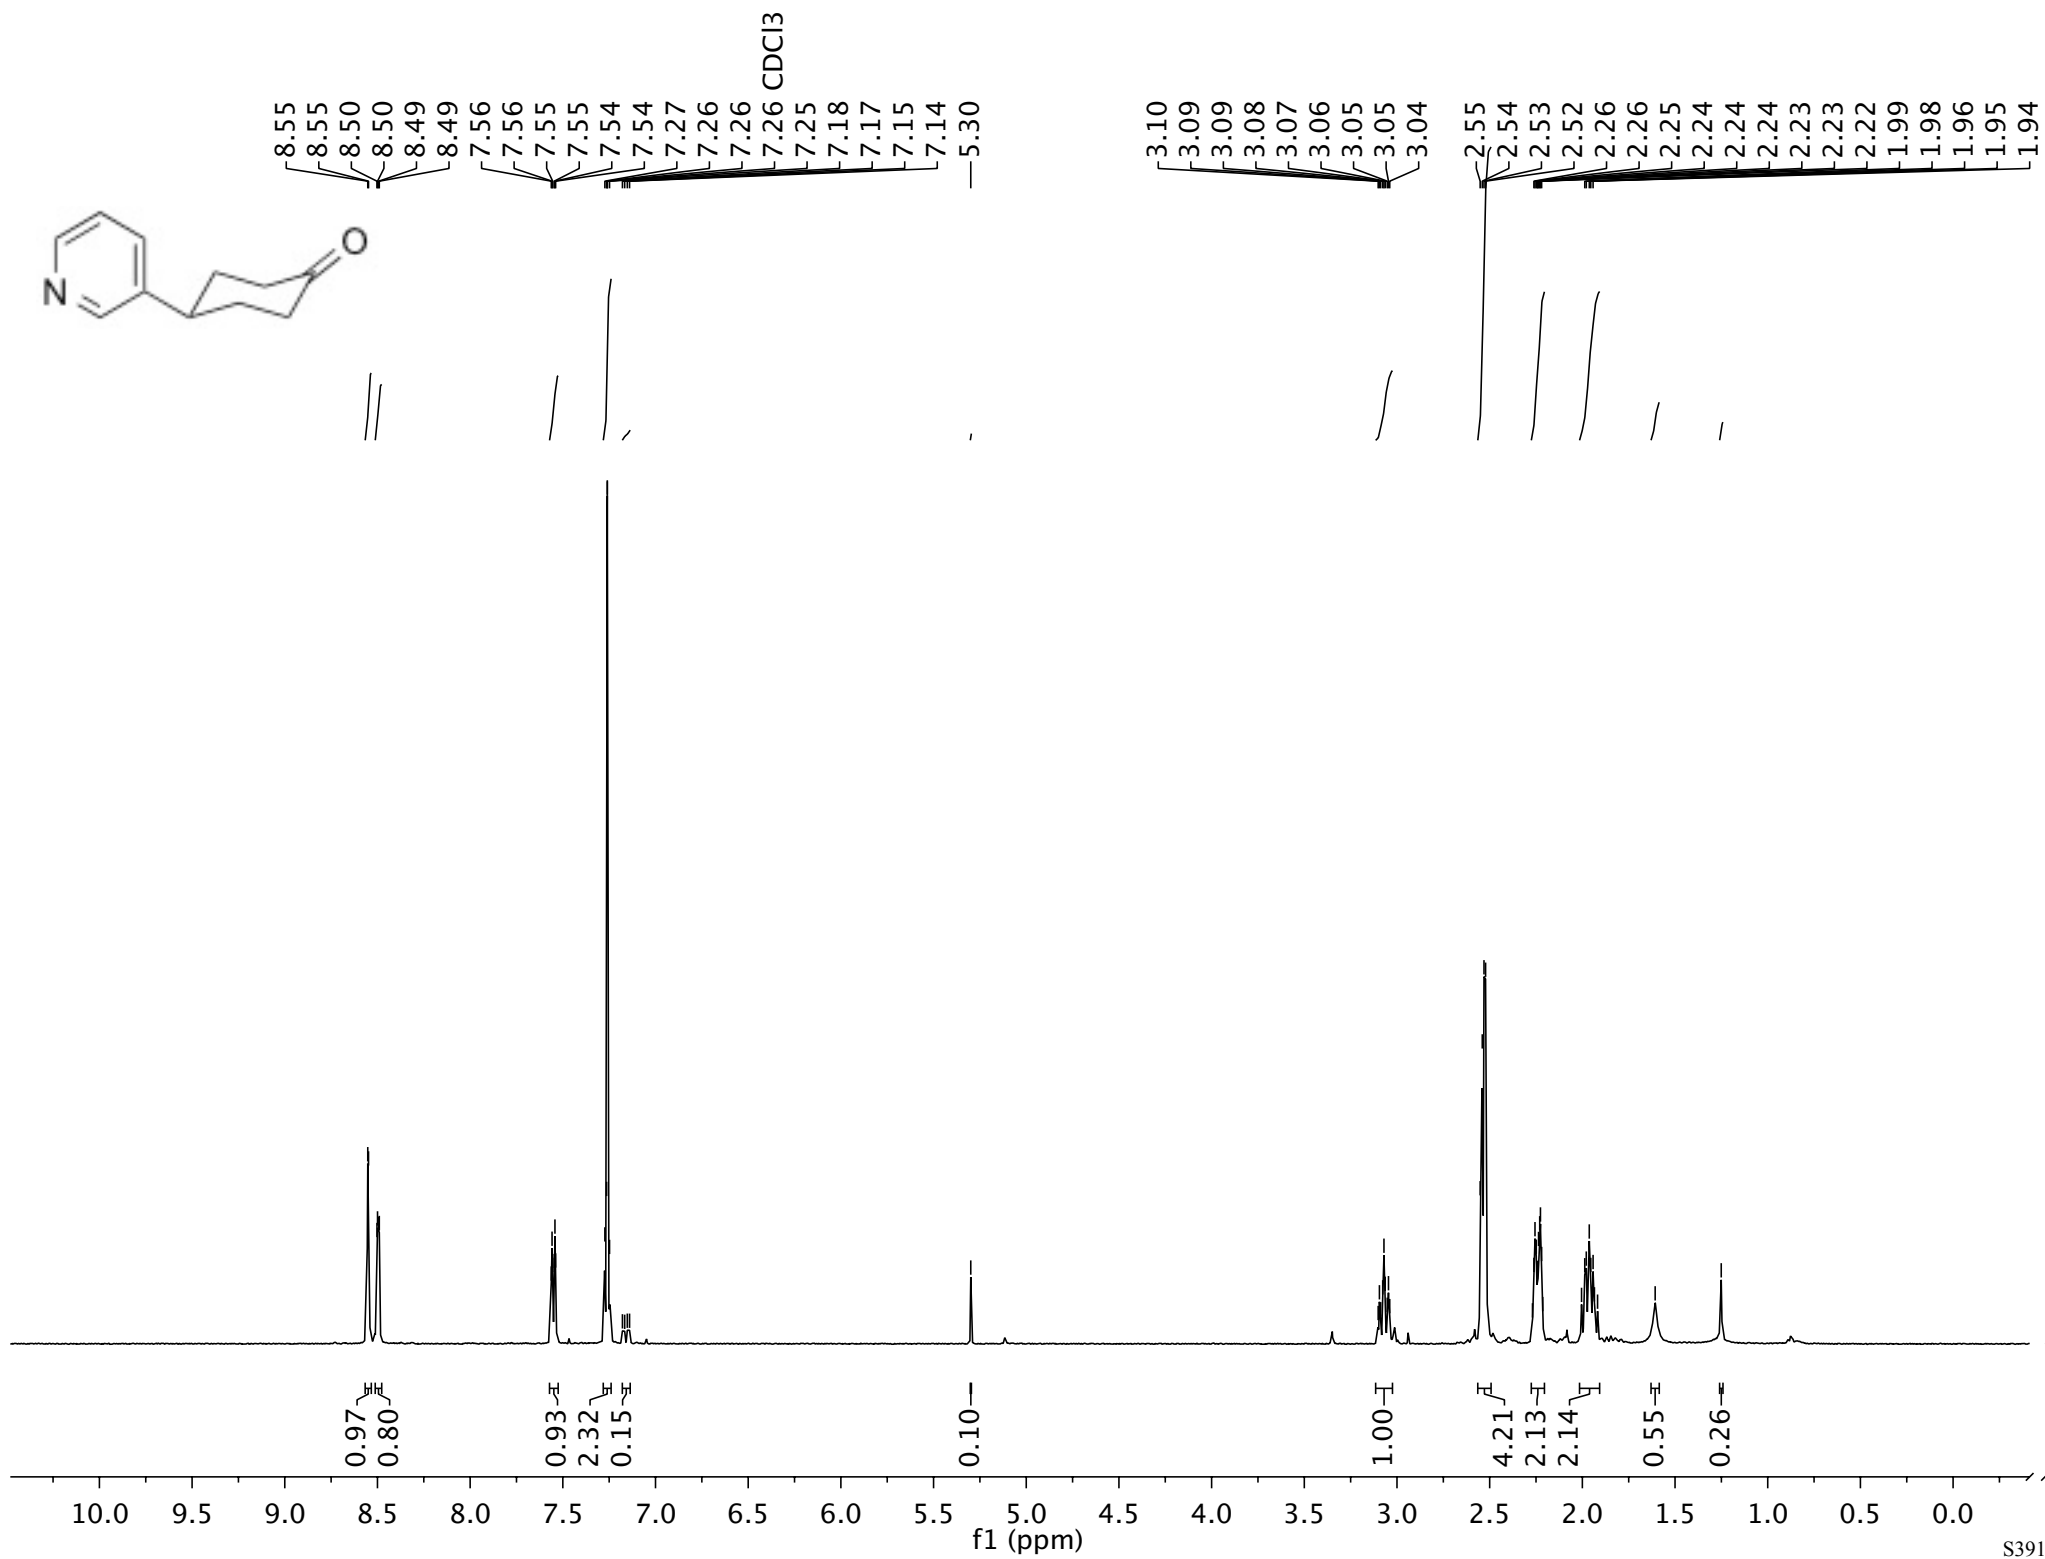



|    | Parameter              | Value          |
|----|------------------------|----------------|
| 1  | Origin                 | Varian         |
| 2  | Spectrometer           | inova          |
| 3  | Solvent                | CDCl3          |
| 4  | Temperature            | 20.0           |
| 5  | Pulse Sequence         | s2pul          |
| 6  | Experiment             | 1D             |
| 7  | Probe                  | QUADG          |
| 8  | Number of Scans        | 8              |
| 9  | Receiver Gain          | 44             |
| 10 | Relaxation Delay       | 0.0000         |
| 11 | Pulse Width            | 0.0000         |
| 12 | Acquisition Time       | 4.0960         |
| 13 | Spectrometer Frequency | 499.43         |
| 14 | Spectral Width         | 8000.0         |
| 15 | Lowest Frequency       | -1502.7        |
| 16 | Nucleus                | <sup>1</sup> H |
| 17 | Acquired Size          | 32768          |
| 18 | Spectral Size          | 65536          |

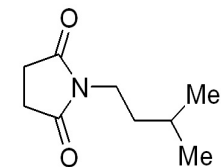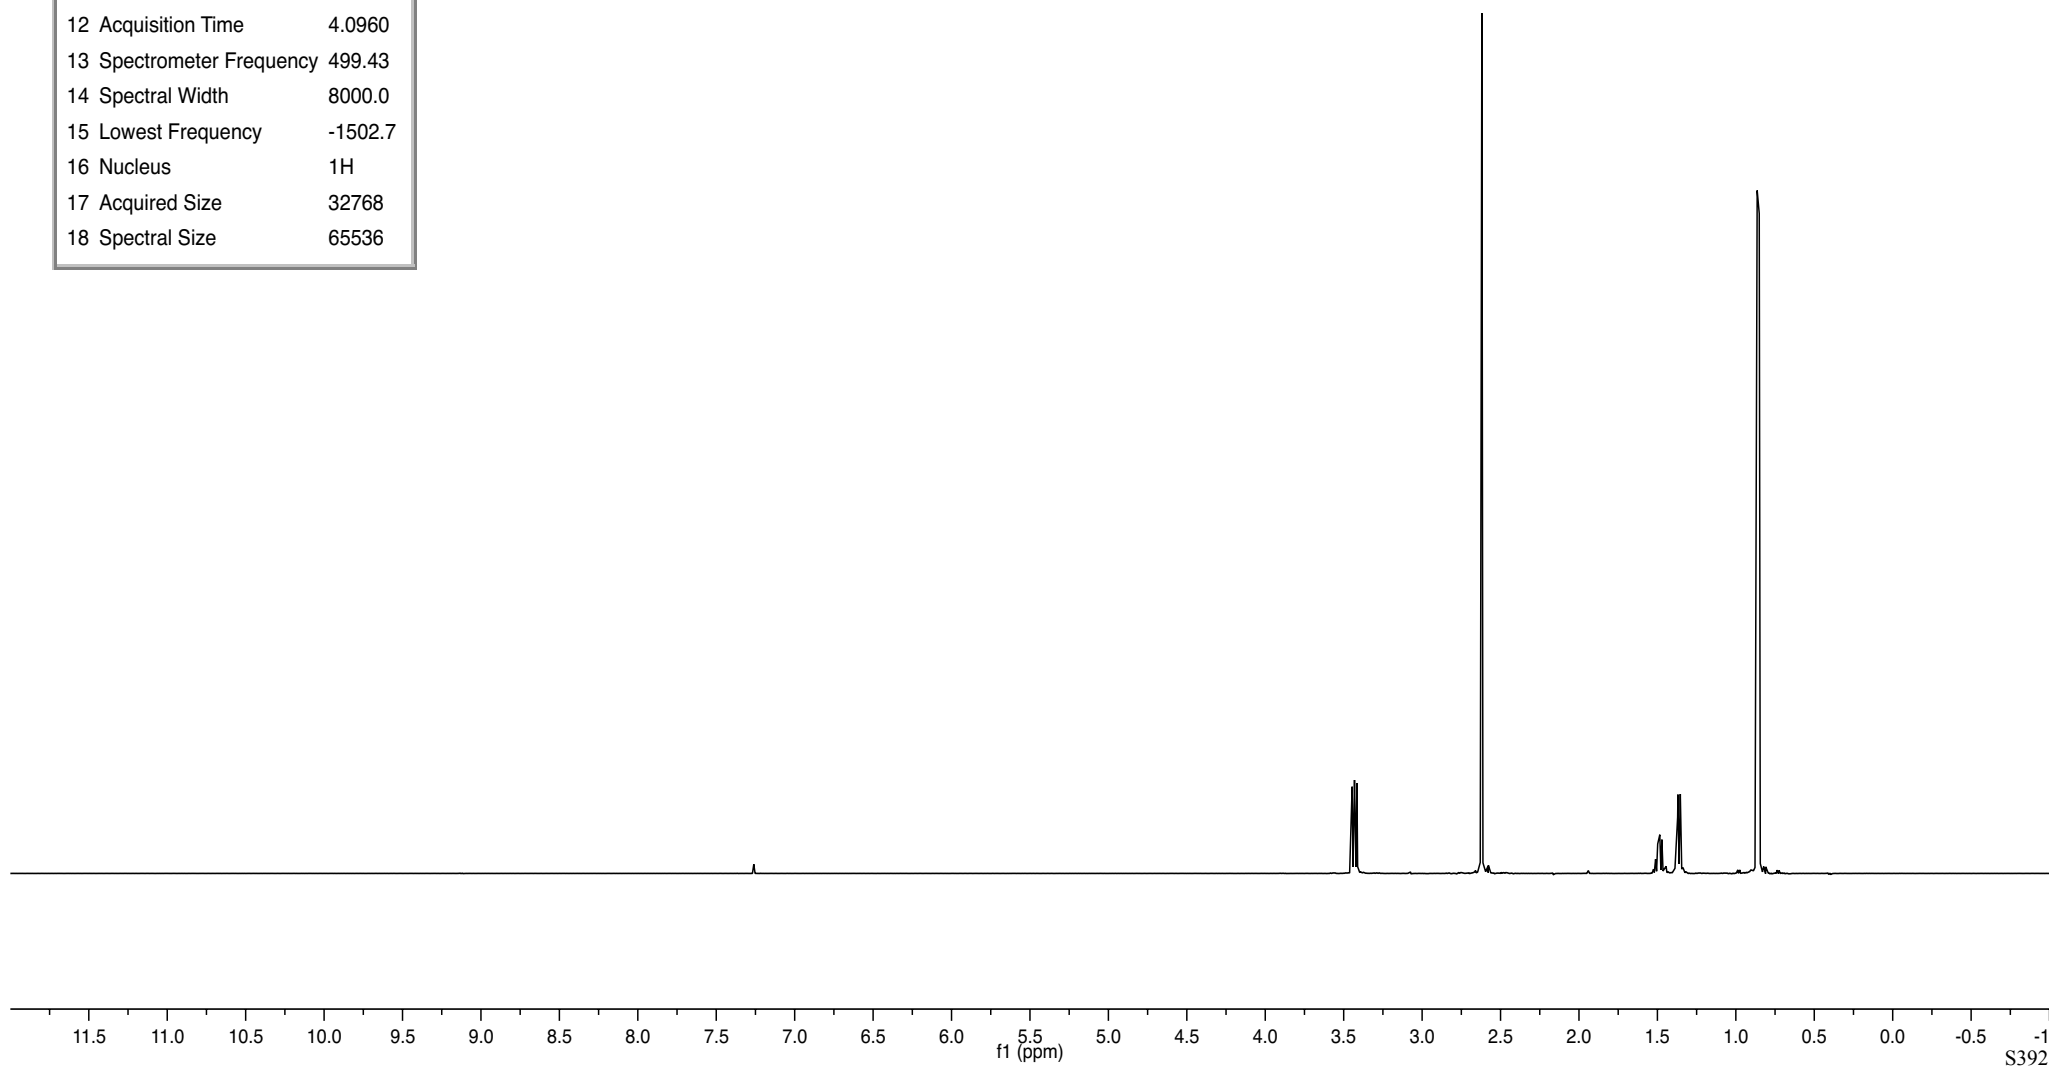

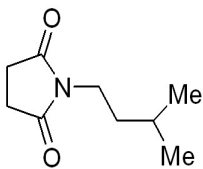

— 7.26 CDCl<sub>3</sub>

3.45  
3.43  
3.43  
3.42  
2.62  
1.54  
1.52  
1.51  
1.50  
1.48  
1.47  
1.46  
1.44  
1.43  
1.38  
1.37  
1.36  
1.35  
1.34  
0.86  
0.85

1.97  
3.94  
1.02  
2.01  
6.00

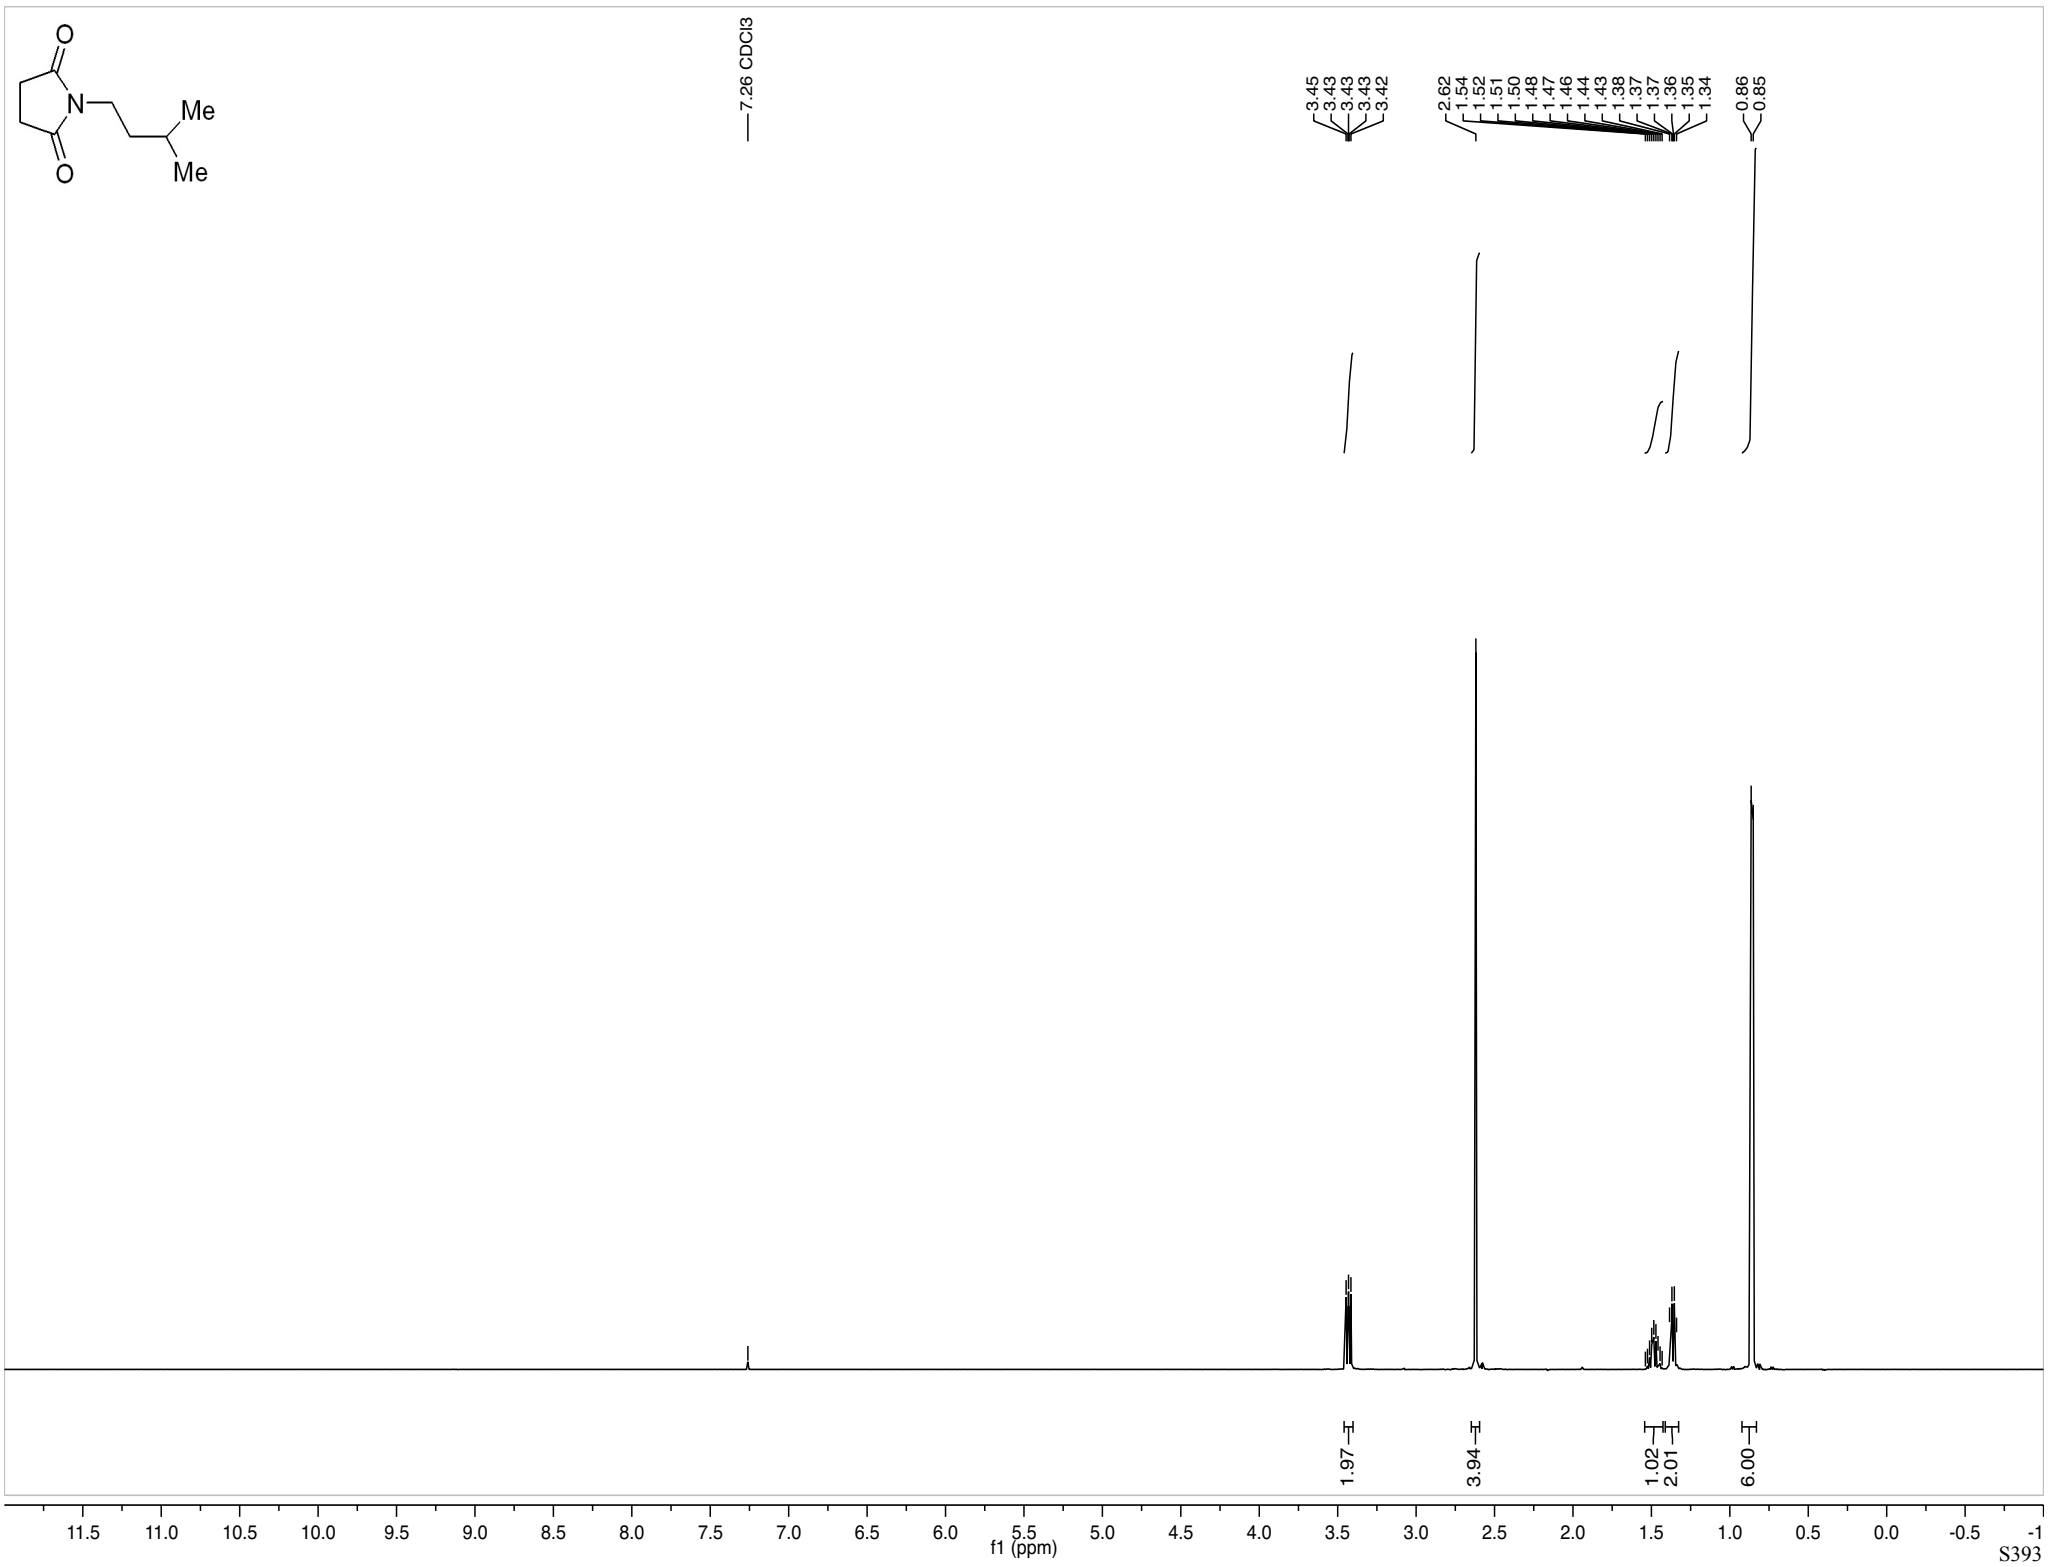

|    | Parameter              | Value           |
|----|------------------------|-----------------|
| 1  | Origin                 | Varian          |
| 2  | Spectrometer           | inova           |
| 3  | Solvent                | CDCl3           |
| 4  | Temperature            | 20.0            |
| 5  | Pulse Sequence         | s2pul           |
| 6  | Experiment             | 1D              |
| 7  | Probe                  | QUADG           |
| 8  | Number of Scans        | 48              |
| 9  | Receiver Gain          | 60              |
| 10 | Relaxation Delay       | 1.0000          |
| 11 | Pulse Width            | 0.0000          |
| 12 | Acquisition Time       | 1.0240          |
| 13 | Spectrometer Frequency | 125.60          |
| 14 | Spectral Width         | 32000.0         |
| 15 | Lowest Frequency       | -2188.2         |
| 16 | Nucleus                | <sup>13</sup> C |
| 17 | Acquired Size          | 32768           |
| 18 | Spectral Size          | 65536           |

— 77.16 CDCl<sub>3</sub>

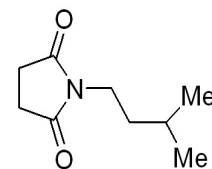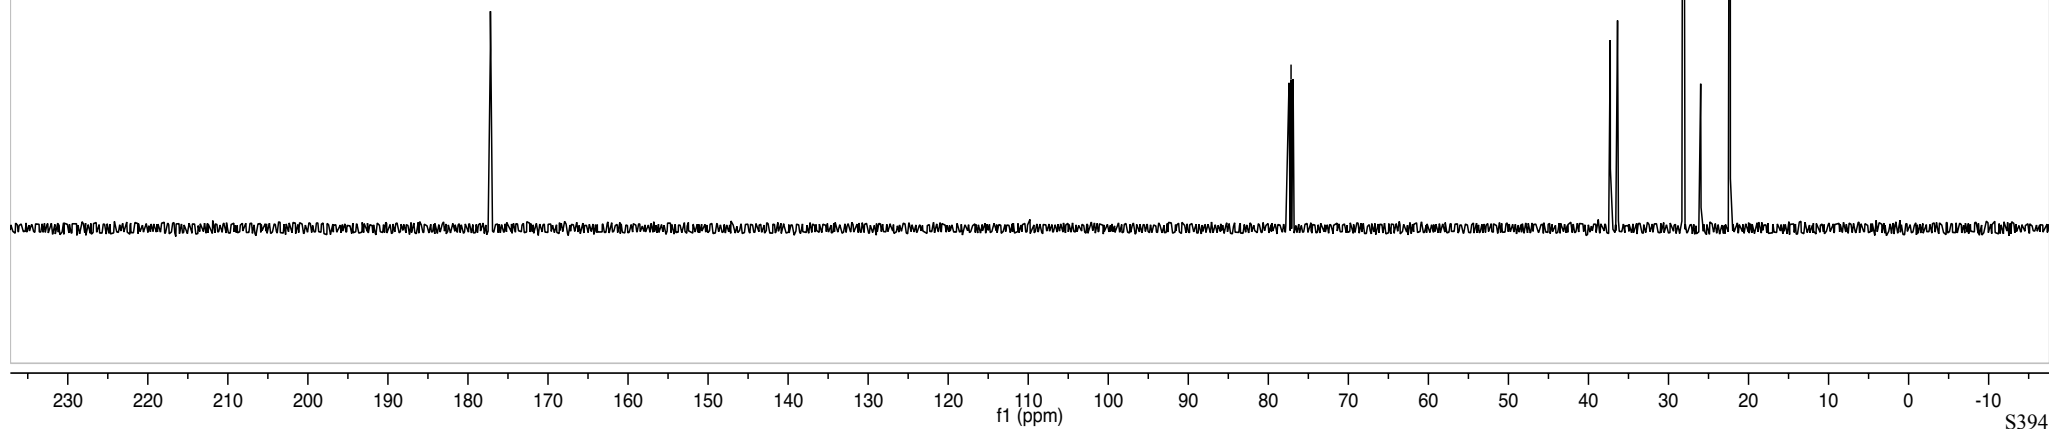

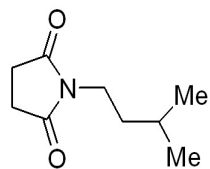

— 177.2

— 77.2 CDCl<sub>3</sub>

37.3  
36.4

28.2  
26.0  
26.0  
22.3

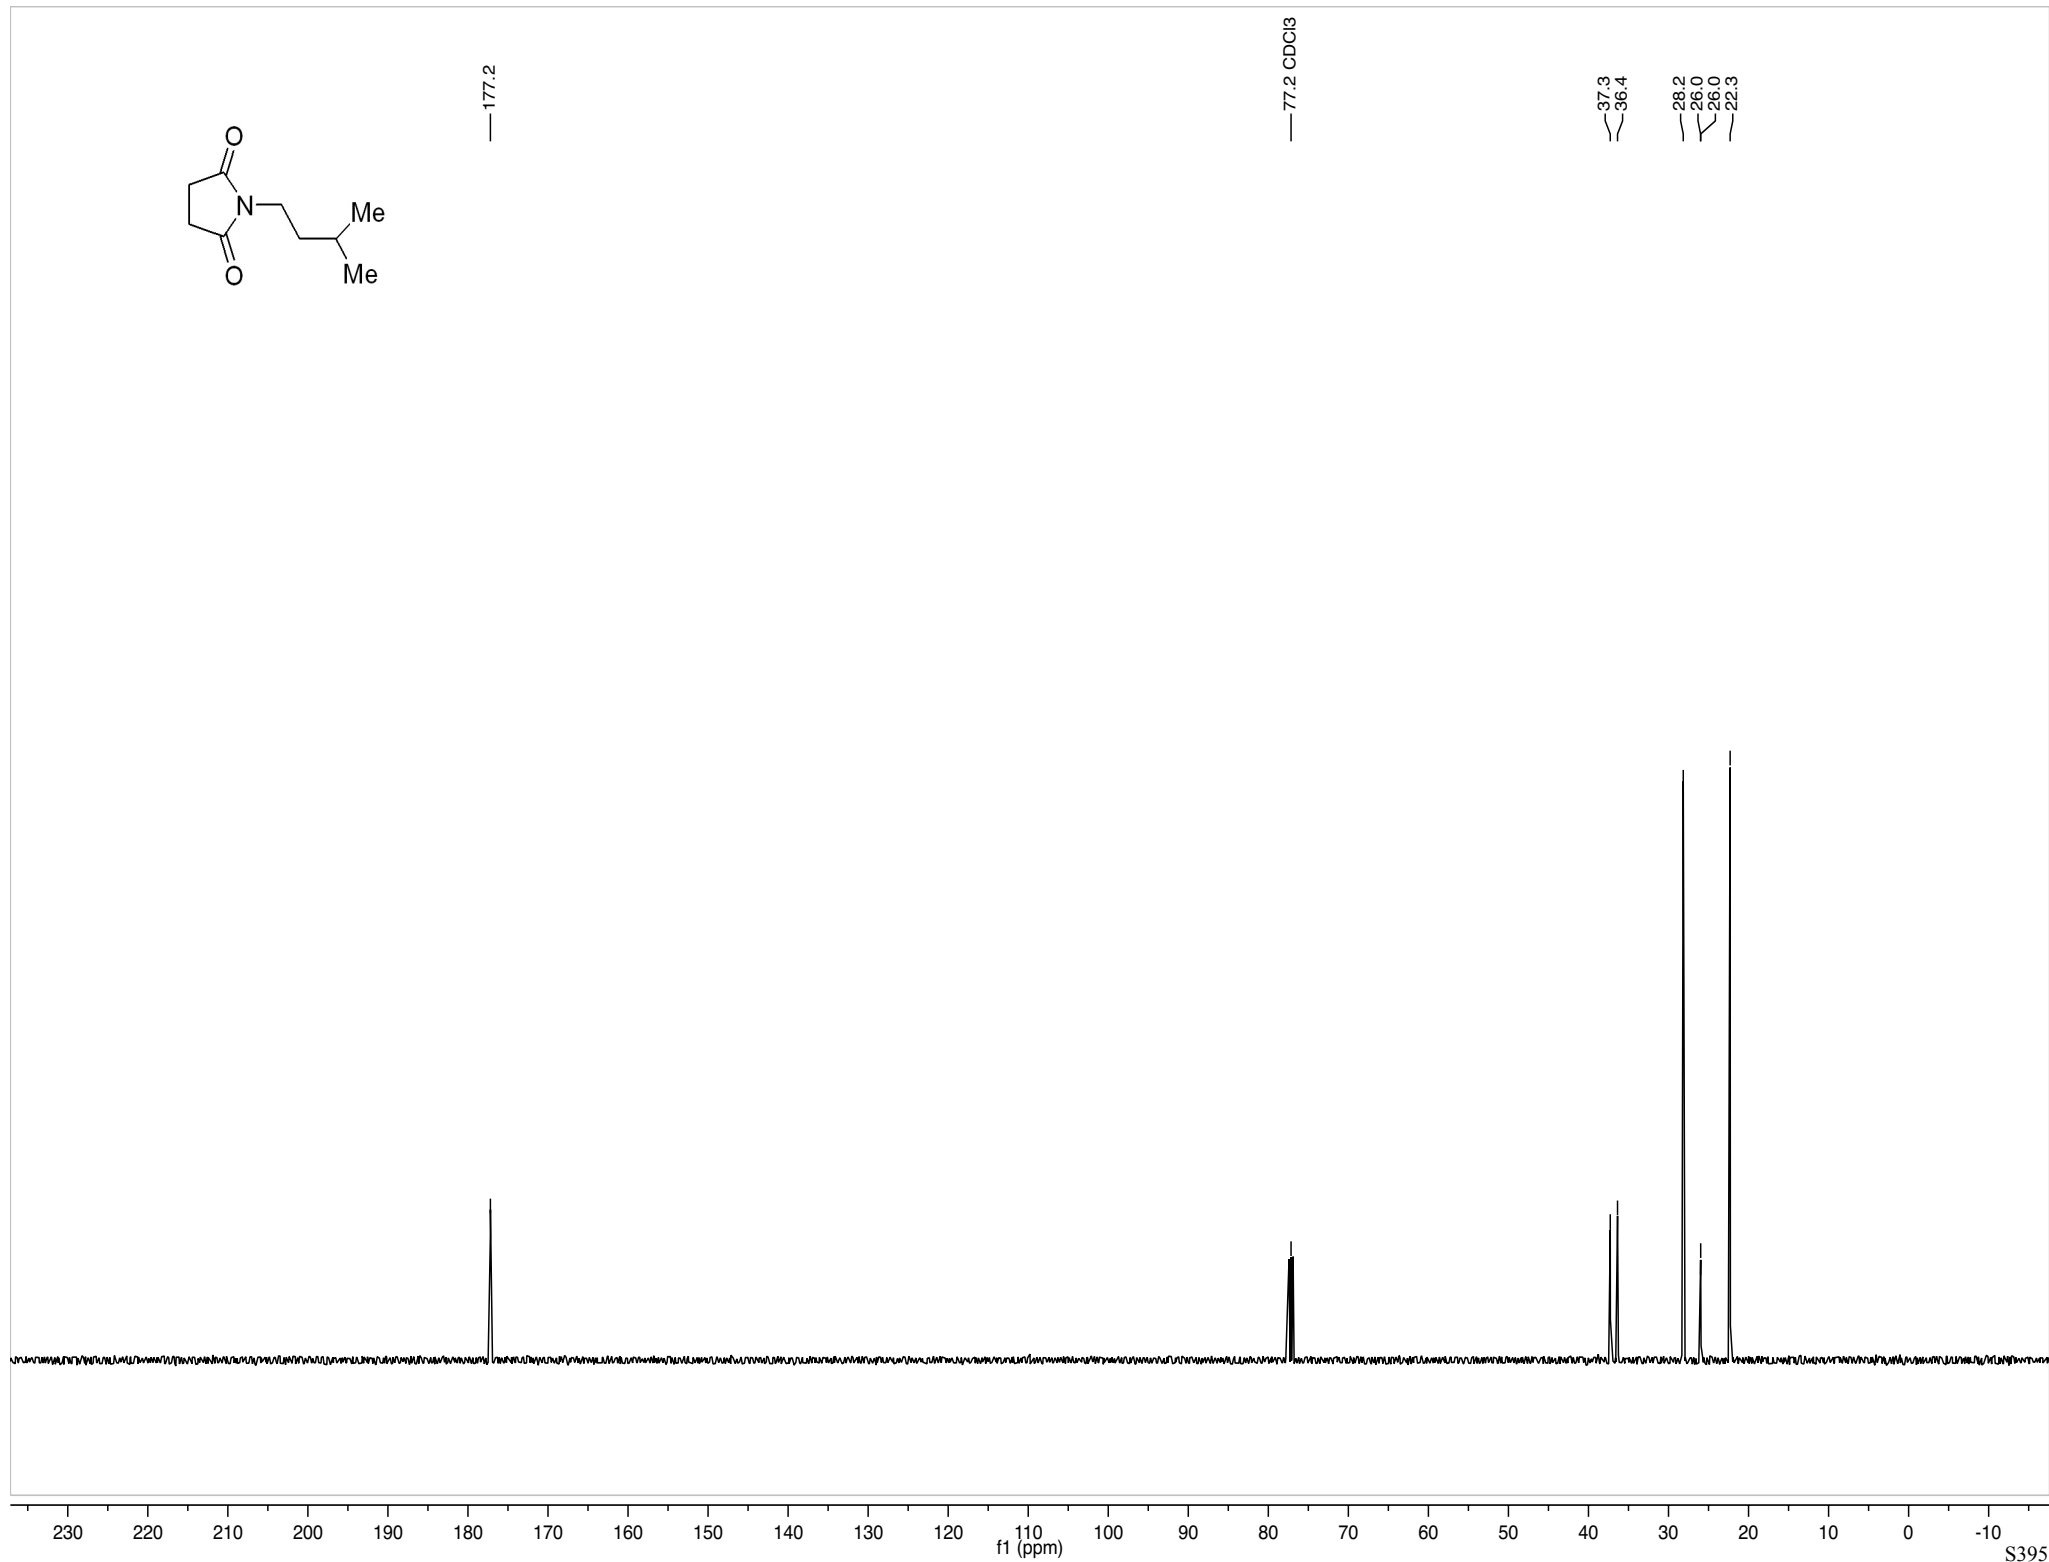

|    | Parameter              | Value             |
|----|------------------------|-------------------|
| 1  | Origin                 | Varian            |
| 2  | Spectrometer           | inova             |
| 3  | Solvent                | CDCl <sub>3</sub> |
| 4  | Temperature            | 20.0              |
| 5  | Pulse Sequence         | s2pul             |
| 6  | Experiment             | 1D                |
| 7  | Probe                  | QUADG             |
| 8  | Number of Scans        | 8                 |
| 9  | Receiver Gain          | 44                |
| 10 | Relaxation Delay       | 0.0000            |
| 11 | Pulse Width            | 0.0000            |
| 12 | Acquisition Time       | 4.0960            |
| 13 | Spectrometer Frequency | 499.43            |
| 14 | Spectral Width         | 8000.0            |
| 15 | Lowest Frequency       | -1508.2           |
| 16 | Nucleus                | <sup>1</sup> H    |
| 17 | Acquired Size          | 32768             |
| 18 | Spectral Size          | 65536             |

— 7.26 CDCl<sub>3</sub>

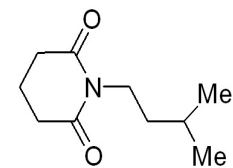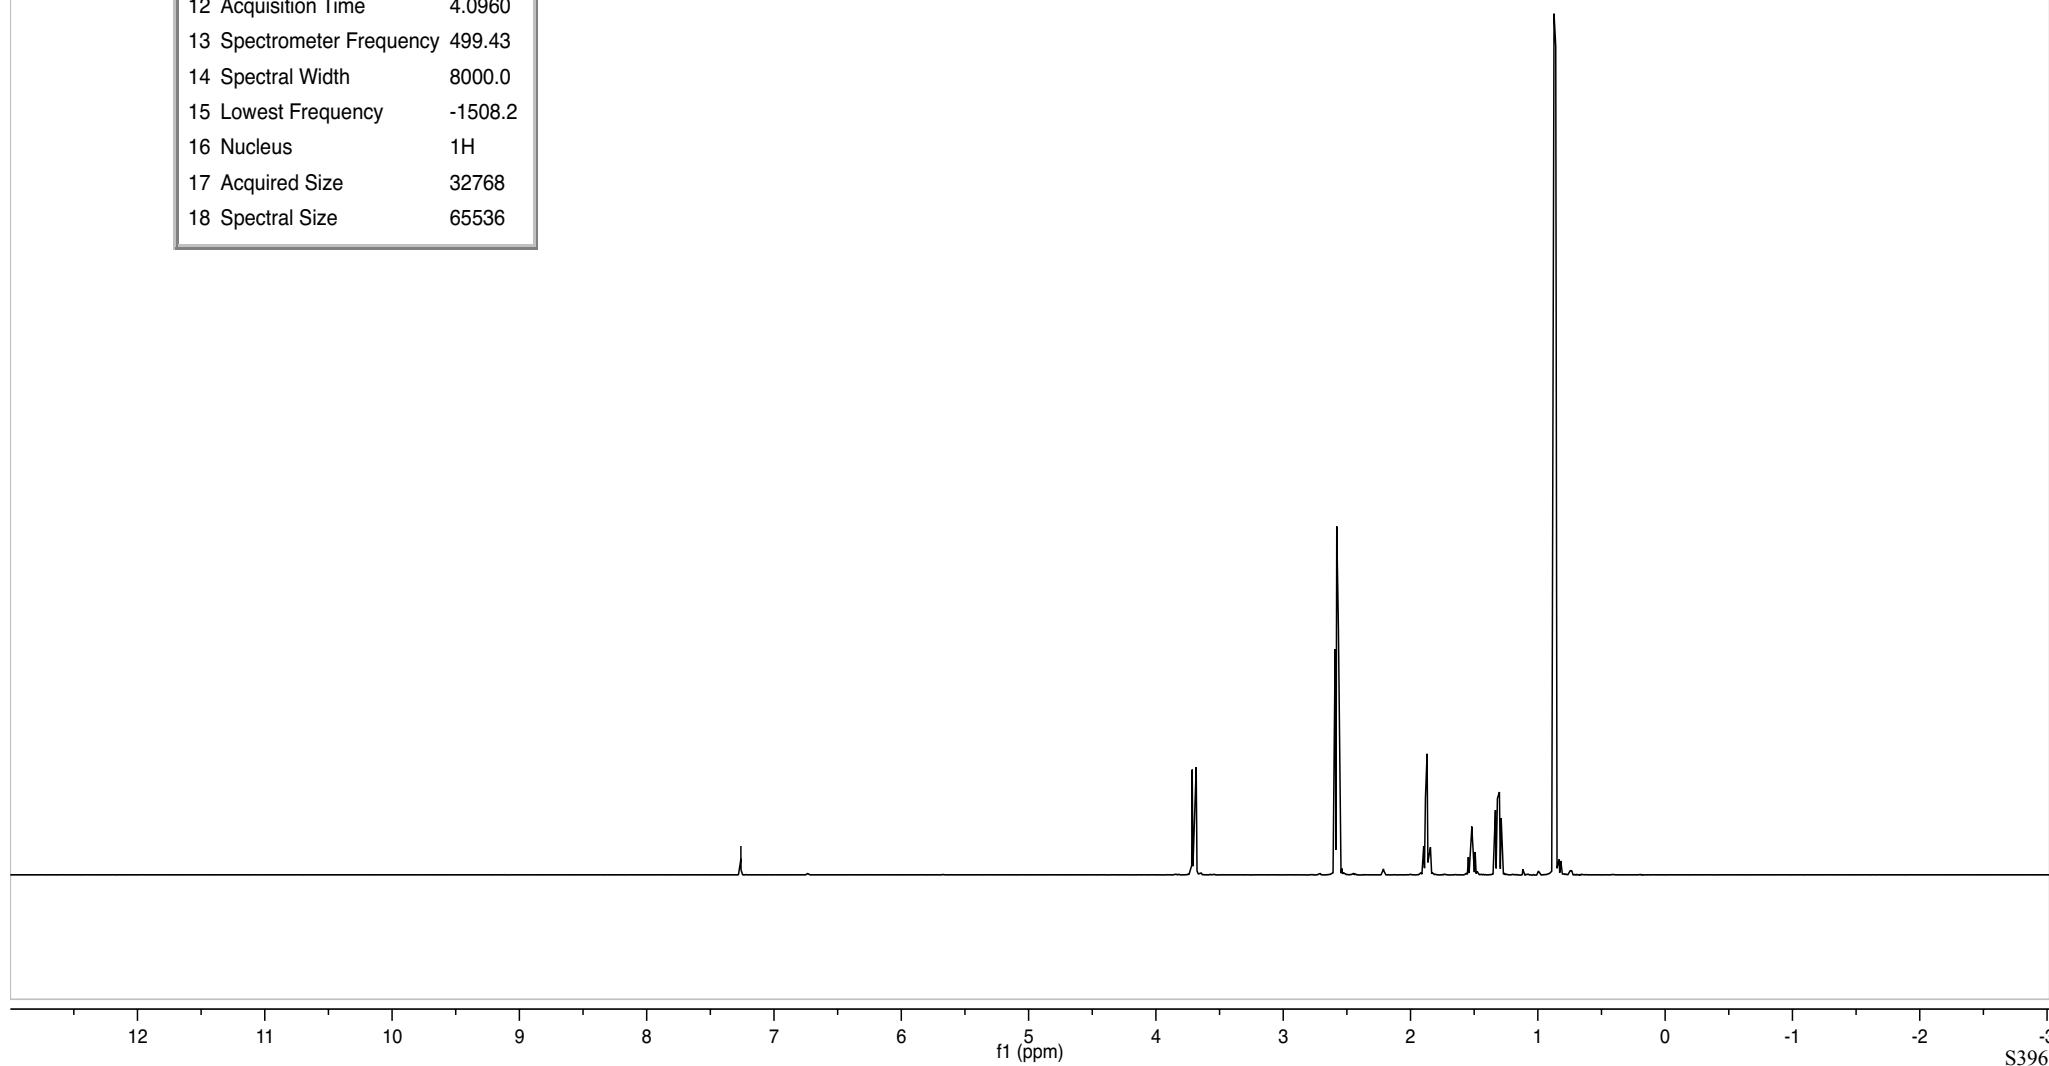

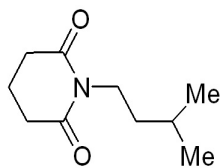

— 7.26 CDCl<sub>3</sub>

3.71  
3.70  
3.70  
3.69  
3.68  
  
2.59  
2.58  
2.57  
  
1.90  
1.88  
1.87  
1.86  
1.84  
1.57  
1.56  
1.55  
1.53  
1.52  
1.51  
1.49  
1.48  
1.47  
1.33  
1.32  
1.32  
1.31  
1.31  
1.30  
1.30  
1.29  
0.87  
0.86

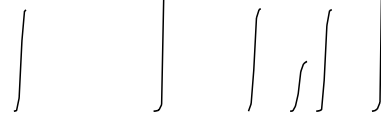

2.00  
4.00  
2.03  
0.98  
2.01  
6.04

12 11 10 9 8 7 6 5 4 3 2 1 0 -1 -2

f1 (ppm)

S397

|    | Parameter              | Value   |
|----|------------------------|---------|
| 1  | Origin                 | Varian  |
| 2  | Spectrometer           | inova   |
| 3  | Solvent                | CDCl3   |
| 4  | Temperature            | 20.0    |
| 5  | Pulse Sequence         | s2pul   |
| 6  | Experiment             | 1D      |
| 7  | Probe                  | QUADG   |
| 8  | Number of Scans        | 64      |
| 9  | Receiver Gain          | 60      |
| 10 | Relaxation Delay       | 1.0000  |
| 11 | Pulse Width            | 0.0000  |
| 12 | Acquisition Time       | 1.0240  |
| 13 | Spectrometer Frequency | 125.60  |
| 14 | Spectral Width         | 32000.0 |
| 15 | Lowest Frequency       | -2188.2 |
| 16 | Nucleus                | 13C     |
| 17 | Acquired Size          | 32768   |
| 18 | Spectral Size          | 65536   |

— 77.16 CDCl3

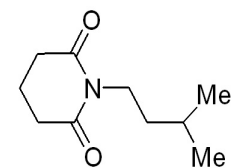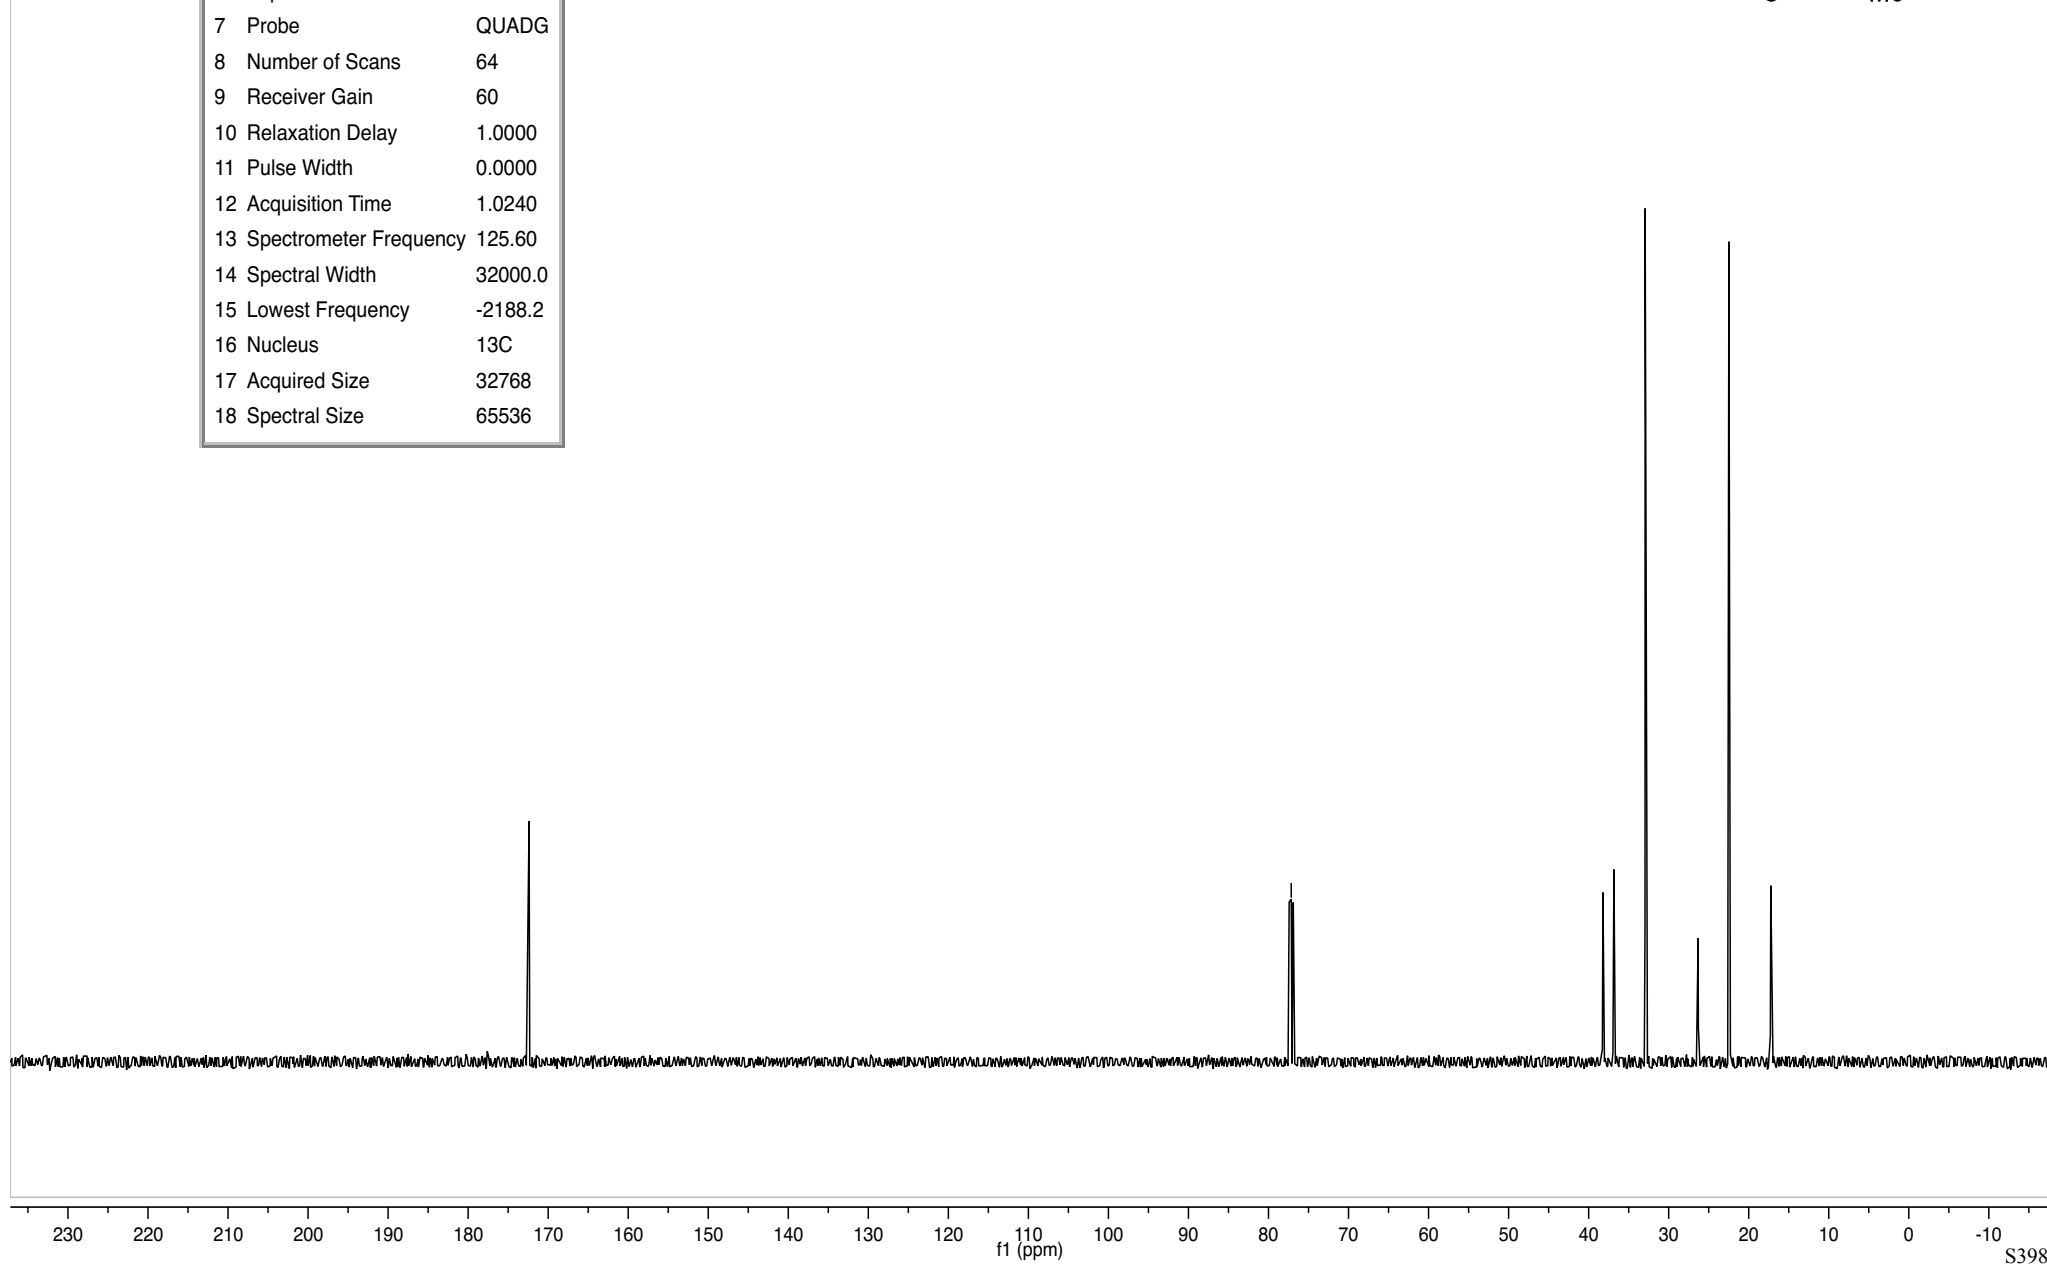

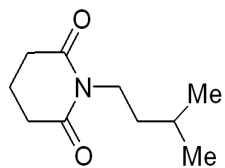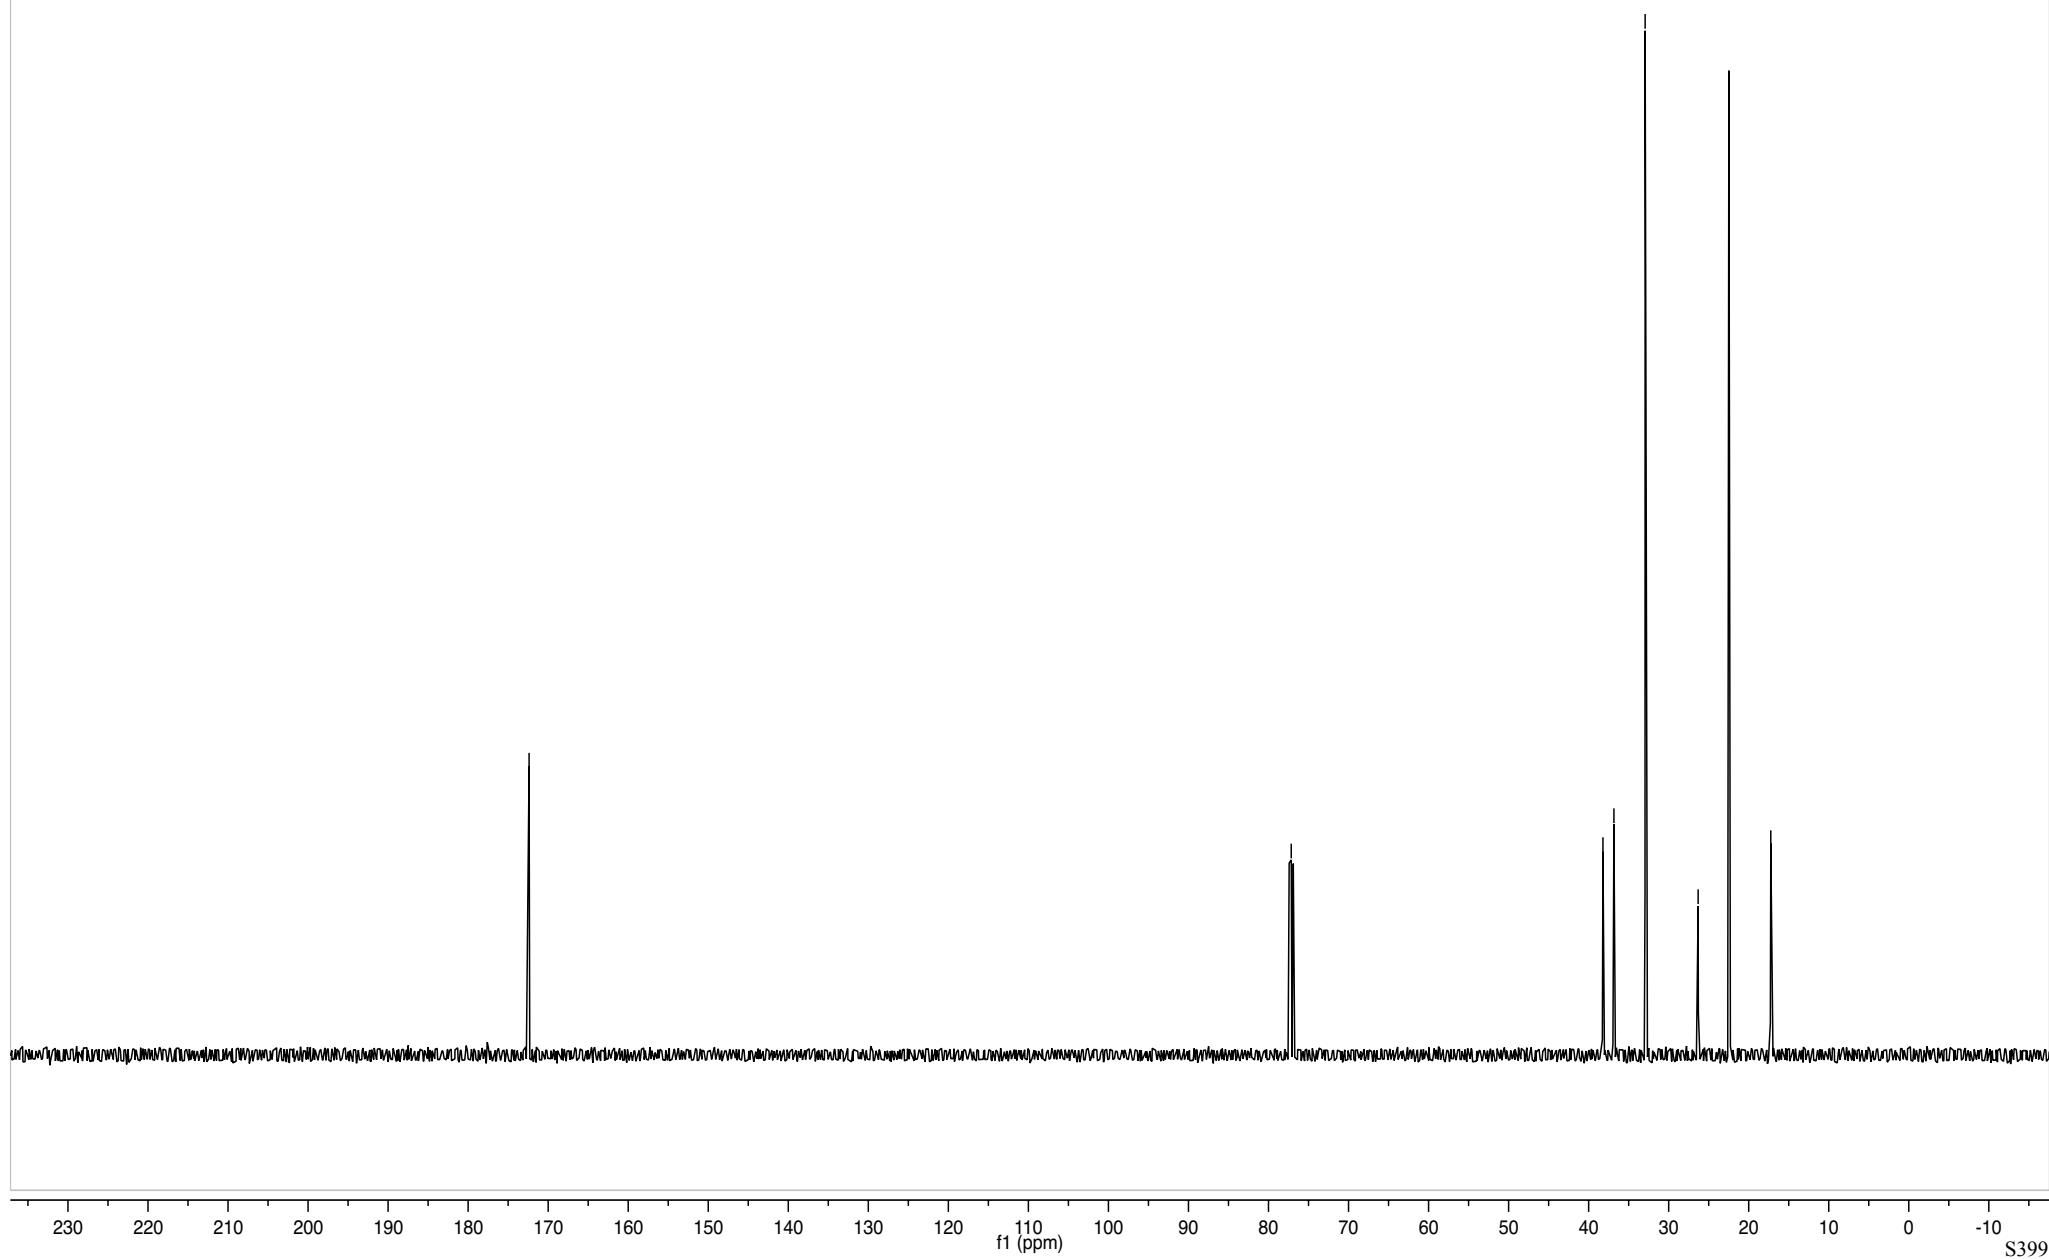



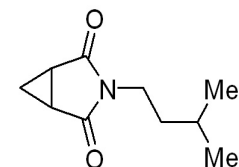

— 7.26 CDCl<sub>3</sub>

|    | Parameter              | Value             |
|----|------------------------|-------------------|
| 1  | Origin                 | Varian            |
| 2  | Spectrometer           | inova             |
| 3  | Solvent                | CDCl <sub>3</sub> |
| 4  | Temperature            | 20.0              |
| 5  | Pulse Sequence         | s2pul             |
| 6  | Experiment             | 1D                |
| 7  | Probe                  | QUAD              |
| 8  | Number of Scans        | 8                 |
| 9  | Receiver Gain          | 41                |
| 10 | Relaxation Delay       | 0.0000            |
| 11 | Pulse Width            | 0.0000            |
| 12 | Acquisition Time       | 4.6645            |
| 13 | Spectrometer Frequency | 499.69            |
| 14 | Spectral Width         | 7024.9            |
| 15 | Lowest Frequency       | -1011.9           |
| 16 | Nucleus                | <sup>1</sup> H    |
| 17 | Acquired Size          | 32768             |
| 18 | Spectral Size          | 65536             |

2.0 11.5 11.0 10.5 10.0 9.5 9.0 8.5 8.0 7.5 7.0 6.5 6.0 5.5 5.0 4.5 4.0 3.5 3.0 2.5 2.0 1.5 1.0 0.5 0.0 -0.5 -1.0 -1.5 -2.0  
f1 (ppm) S400

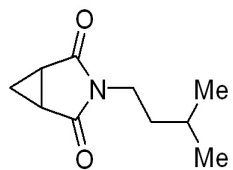

— 7.26 CDCl<sub>3</sub>

3.36  
3.35  
3.34  
3.34  
3.33  
2.45  
2.44  
2.43  
2.42  
1.54  
1.53  
1.52  
1.51  
1.50  
1.49  
1.49  
1.48  
1.47  
1.46  
1.45  
1.43  
1.36  
1.35  
1.34  
1.33  
1.33  
1.32  
1.31  
1.31  
1.30  
1.30  
0.90  
0.88

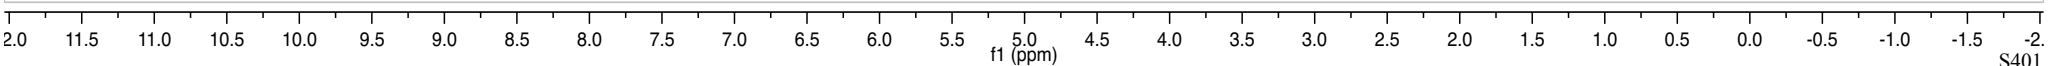

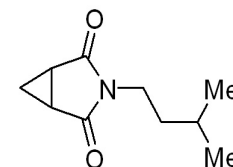

— 77.2 CDCl<sub>3</sub>

|    | Parameter              | Value             |
|----|------------------------|-------------------|
| 1  | Origin                 | Varian            |
| 2  | Spectrometer           | inova             |
| 3  | Solvent                | CDCl <sub>3</sub> |
| 4  | Temperature            | 20.0              |
| 5  | Pulse Sequence         | s2pul             |
| 6  | Experiment             | 1D                |
| 7  | Probe                  | QUAD              |
| 8  | Number of Scans        | 64                |
| 9  | Receiver Gain          | 60                |
| 10 | Relaxation Delay       | 1.0000            |
| 11 | Pulse Width            | 0.0000            |
| 12 | Acquisition Time       | 1.0863            |
| 13 | Spectrometer Frequency | 125.66            |
| 14 | Spectral Width         | 30165.9           |
| 15 | Lowest Frequency       | -1260.2           |
| 16 | Nucleus                | <sup>13</sup> C   |
| 17 | Acquired Size          | 32768             |
| 18 | Spectral Size          | 65536             |

220 210 200 190 180 170 160 150 140 130 120 110 100 90 80 70 60 50 40 30 20 10 0 -1  
f1 (ppm) S402

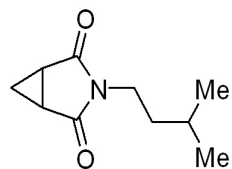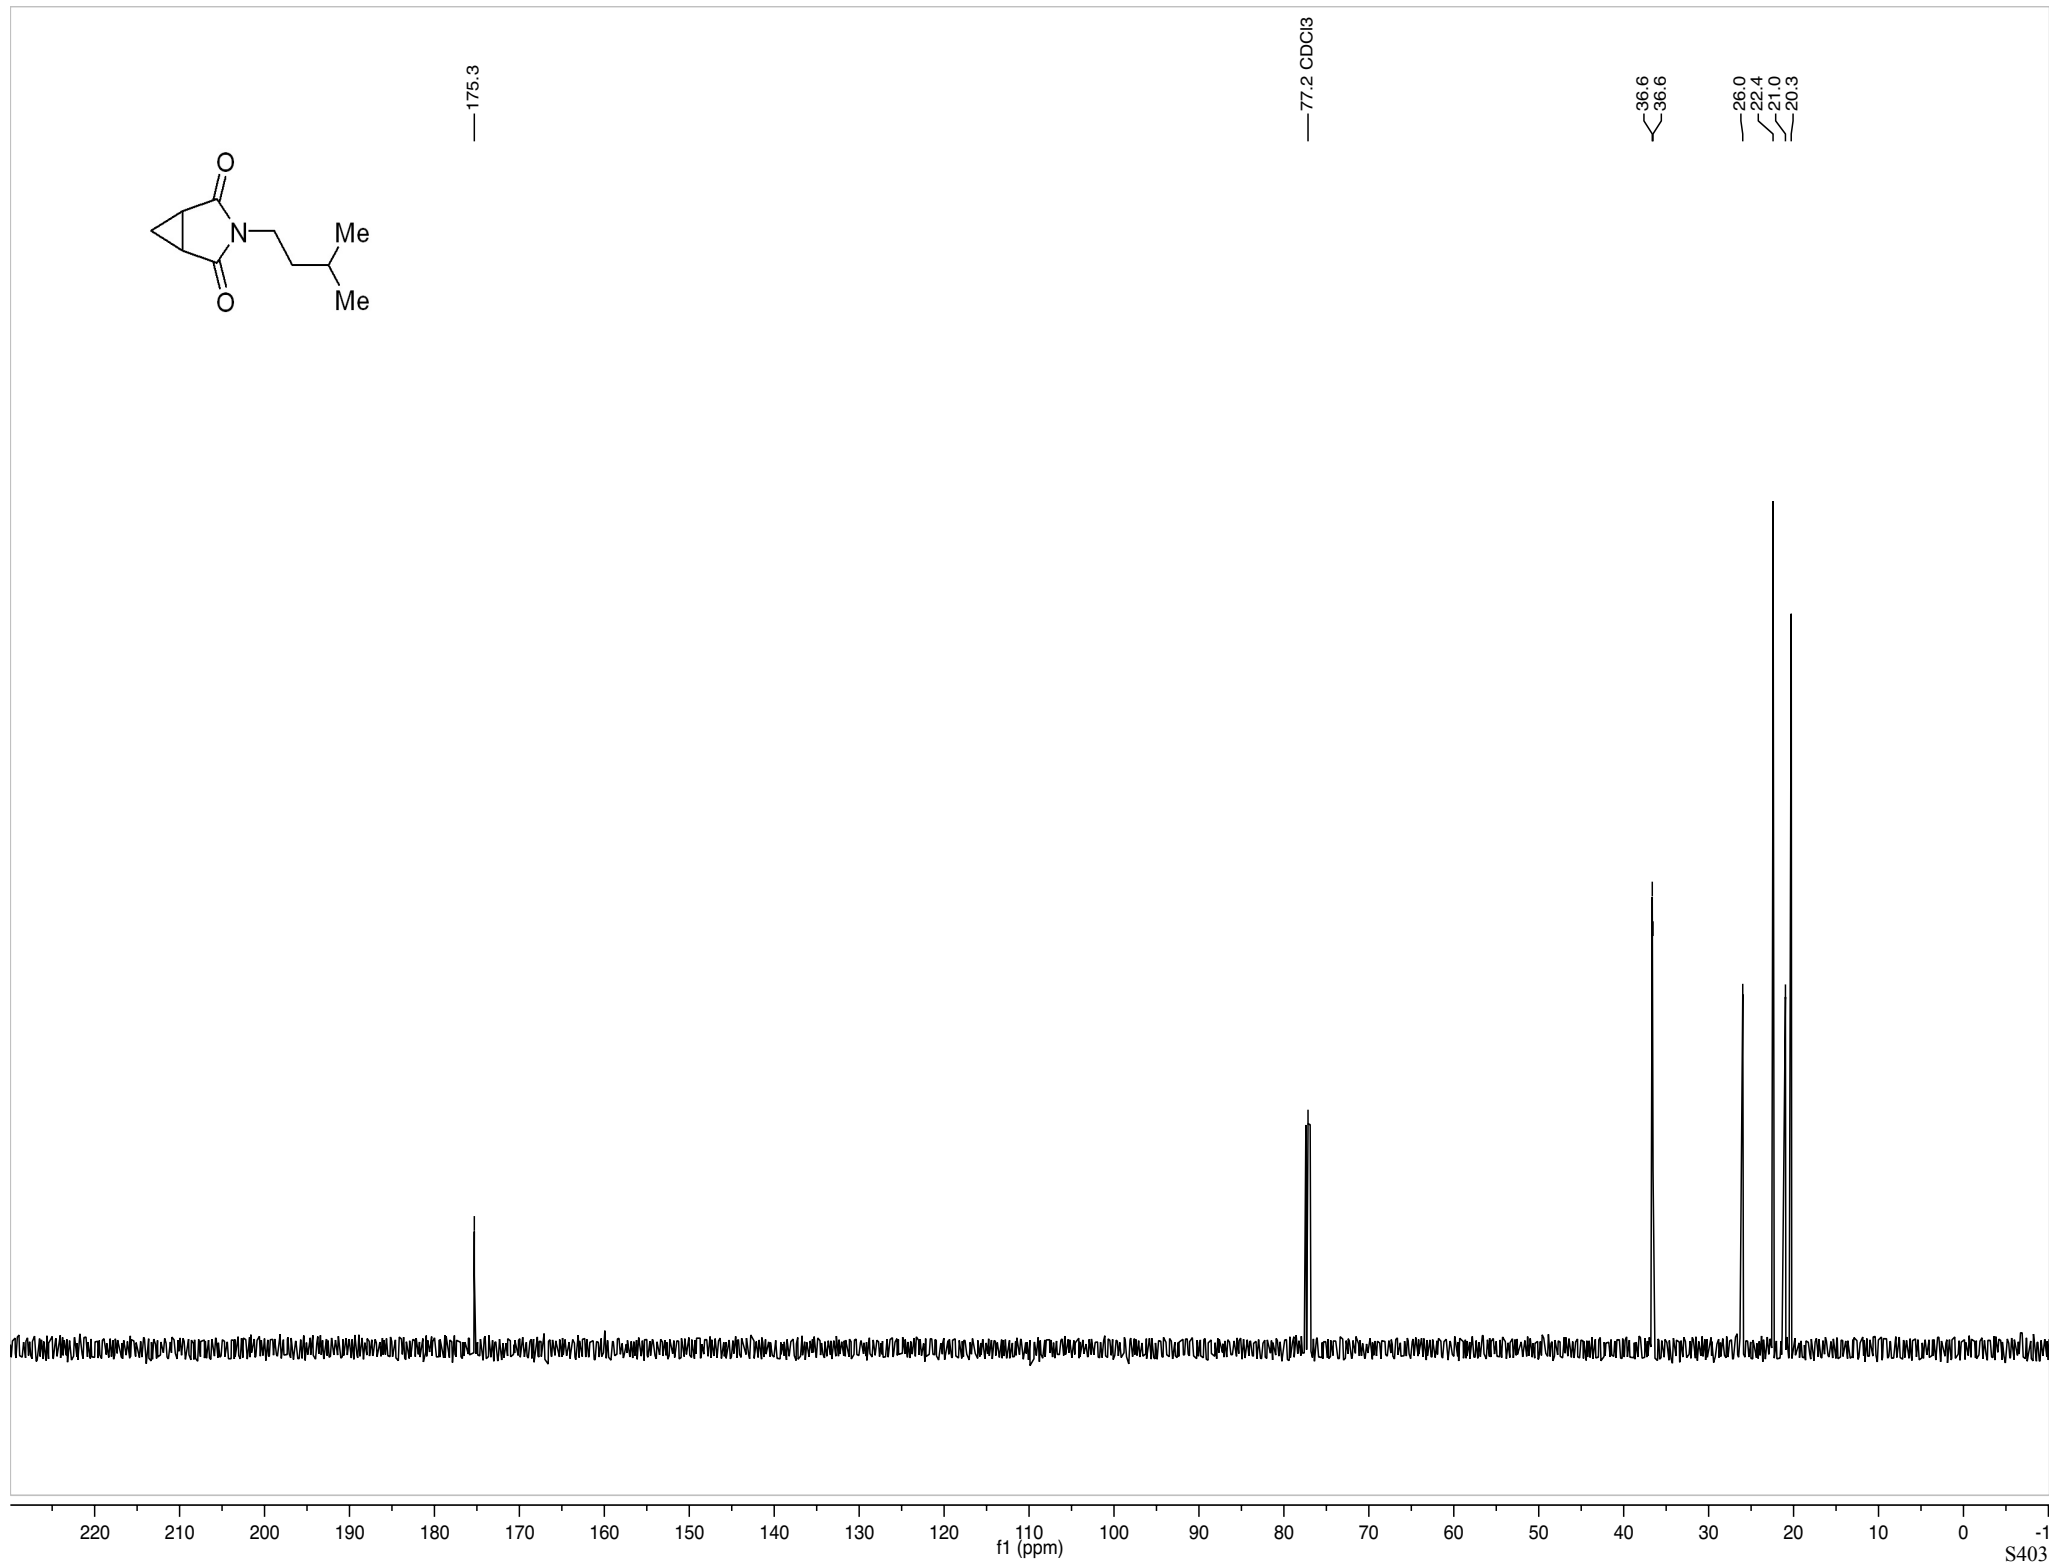

|    | Parameter              | Value          |
|----|------------------------|----------------|
| 1  | Origin                 | Varian         |
| 2  | Spectrometer           | inova          |
| 3  | Solvent                | CDCl3          |
| 4  | Temperature            | 20.0           |
| 5  | Pulse Sequence         | s2pul          |
| 6  | Experiment             | 1D             |
| 7  | Probe                  | QUAD           |
| 8  | Number of Scans        | 8              |
| 9  | Receiver Gain          | 30             |
| 10 | Relaxation Delay       | 0.0000         |
| 11 | Pulse Width            | 0.0000         |
| 12 | Acquisition Time       | 4.6645         |
| 13 | Spectrometer Frequency | 499.69         |
| 14 | Spectral Width         | 7024.9         |
| 15 | Lowest Frequency       | -1011.4        |
| 16 | Nucleus                | <sup>1</sup> H |
| 17 | Acquired Size          | 32768          |
| 18 | Spectral Size          | 65536          |

— 7.26 CDCl<sub>3</sub>

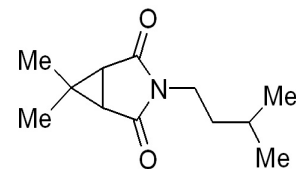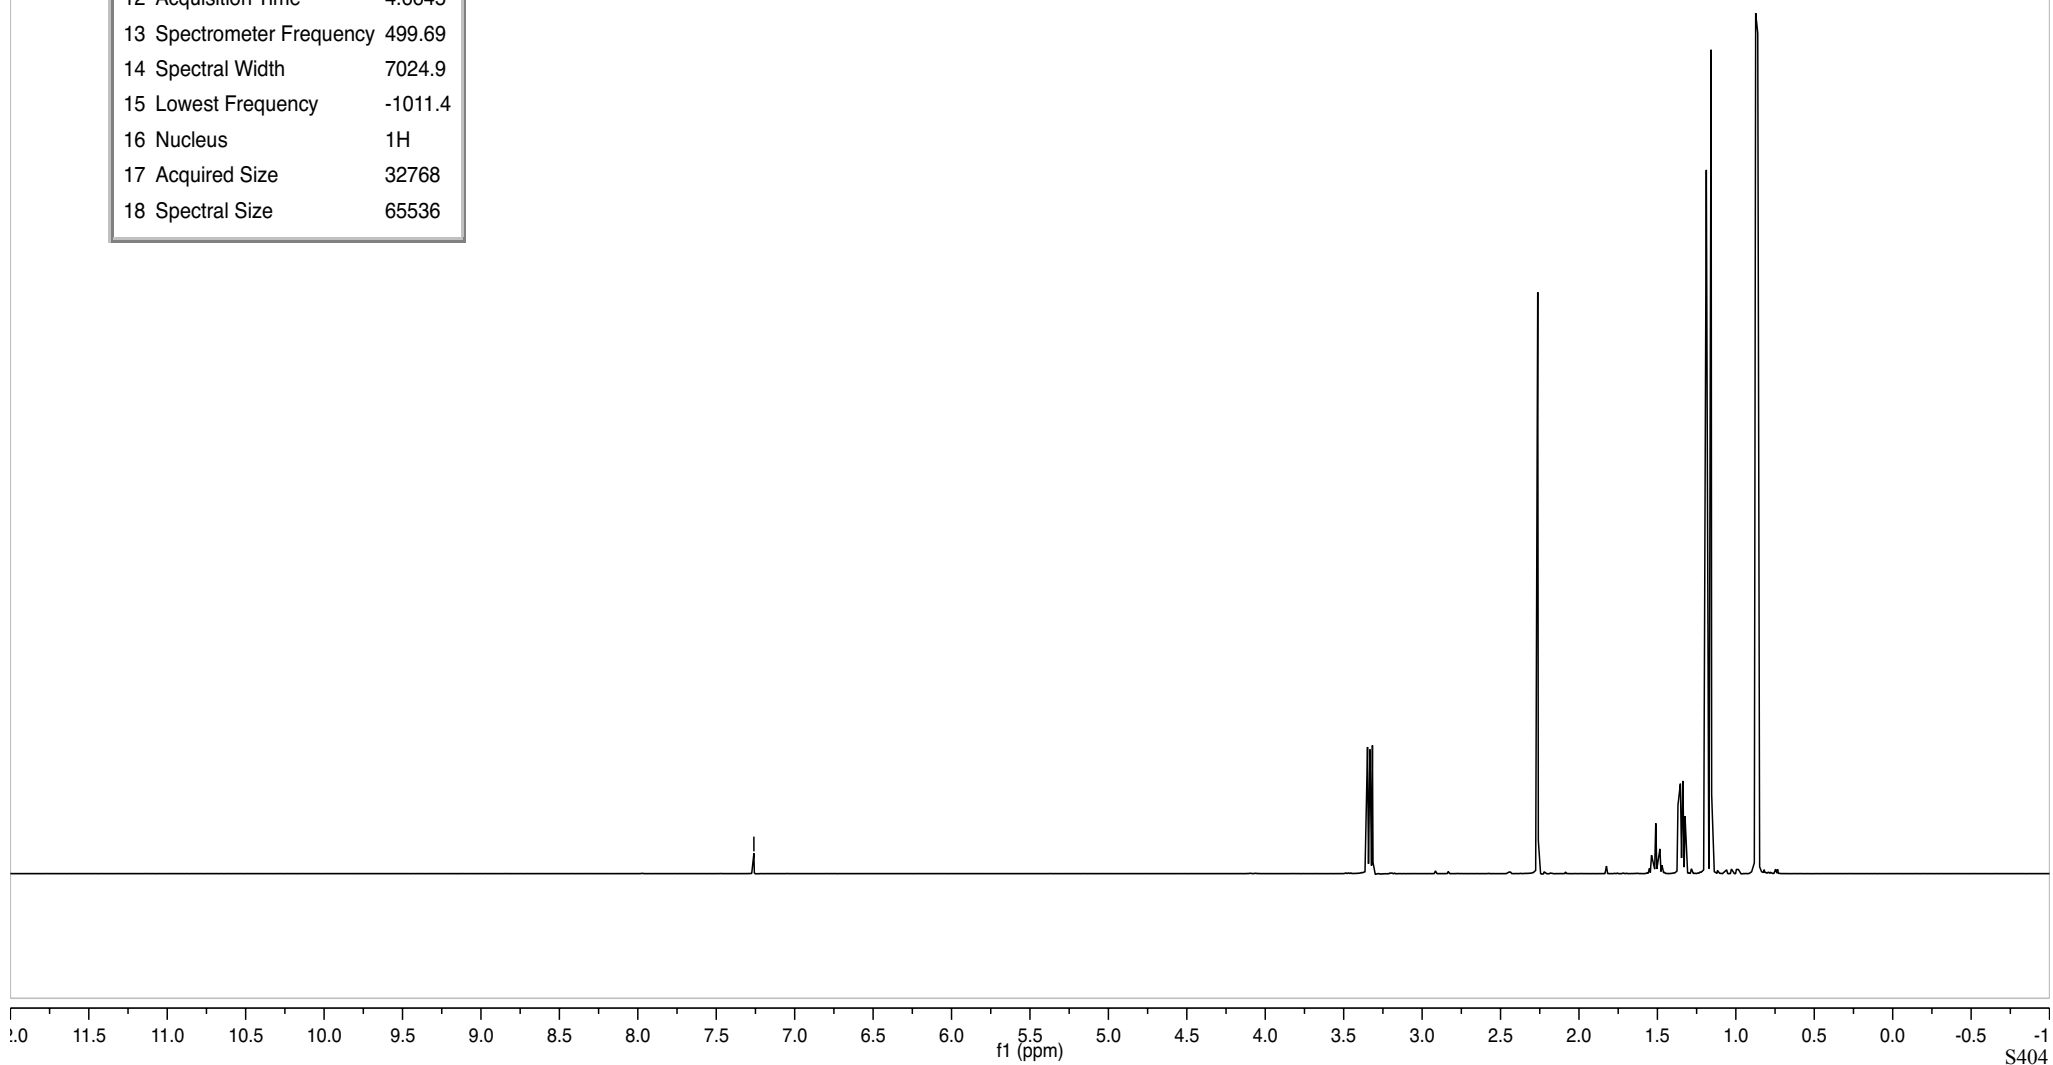

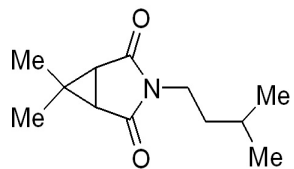

7.26 CDCl<sub>3</sub>

3.35  
3.34  
3.33  
3.32

2.26  
1.37  
1.36  
1.35  
1.34  
1.34  
1.34  
1.32  
1.19  
1.18  
1.16  
1.15  
0.87  
0.86

12.0 11.5 11.0 10.5 10.0 9.5 9.0 8.5 8.0 7.5 7.0 6.5 6.0 5.5 5.0 4.5 4.0 3.5 3.0 2.5 2.0 1.5 1.0 0.5 0.0 -0.5 -1.0

f1 (ppm)

S405

|    | Parameter              | Value   |
|----|------------------------|---------|
| 1  | Origin                 | Varian  |
| 2  | Spectrometer           | inova   |
| 3  | Solvent                | CDCl3   |
| 4  | Temperature            | 20.0    |
| 5  | Pulse Sequence         | s2pul   |
| 6  | Experiment             | 1D      |
| 7  | Probe                  | QUAD    |
| 8  | Number of Scans        | 64      |
| 9  | Receiver Gain          | 60      |
| 10 | Relaxation Delay       | 1.0000  |
| 11 | Pulse Width            | 0.0000  |
| 12 | Acquisition Time       | 1.0863  |
| 13 | Spectrometer Frequency | 125.66  |
| 14 | Spectral Width         | 30165.9 |
| 15 | Lowest Frequency       | -1277.2 |
| 16 | Nucleus                | 13C     |
| 17 | Acquired Size          | 32768   |
| 18 | Spectral Size          | 65536   |

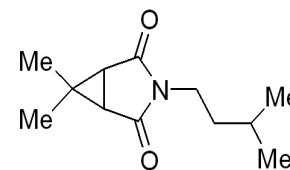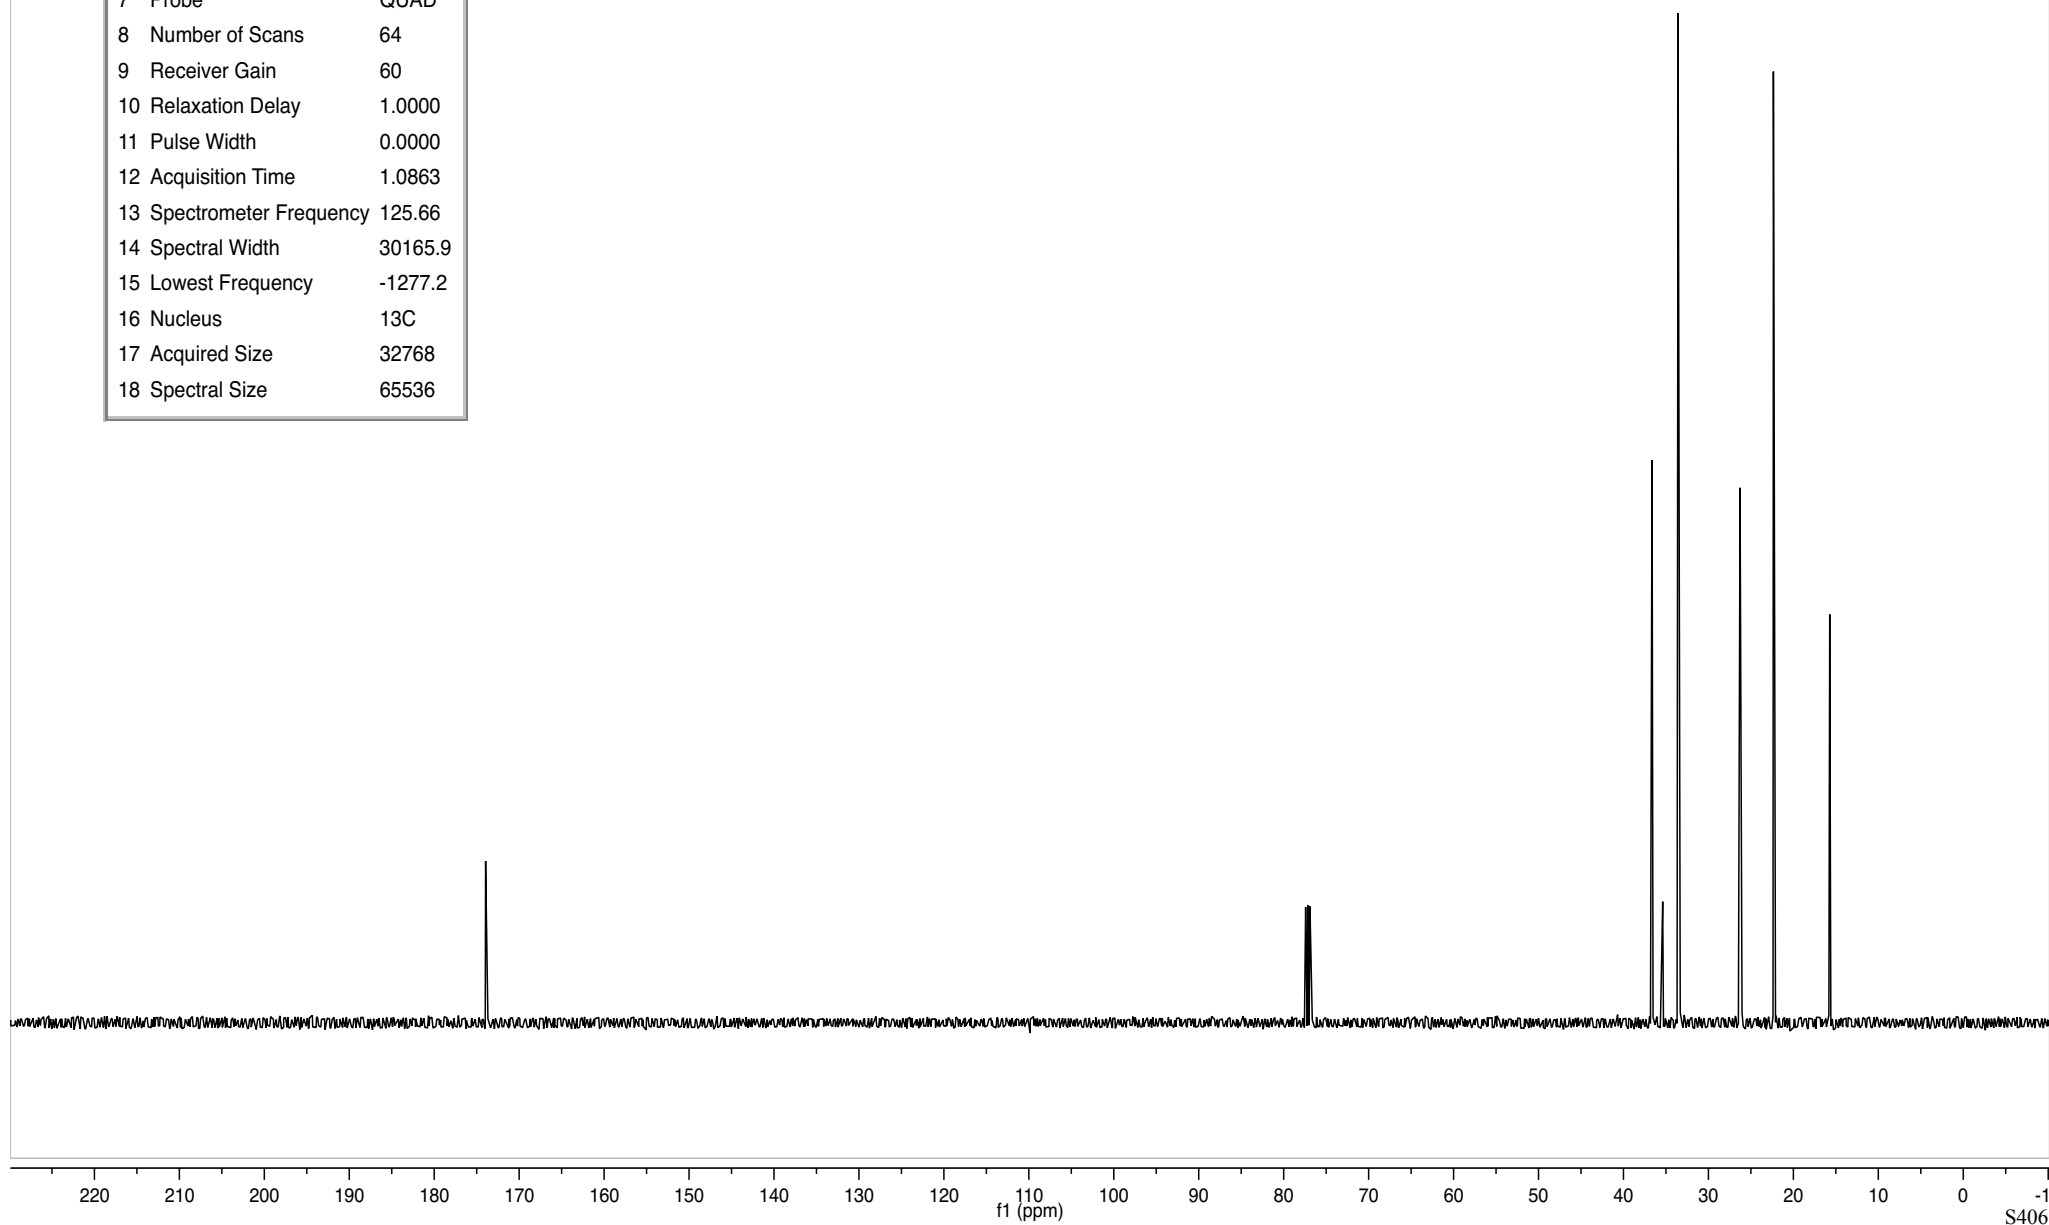

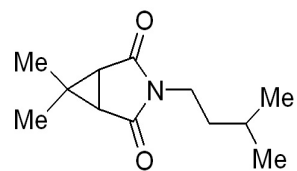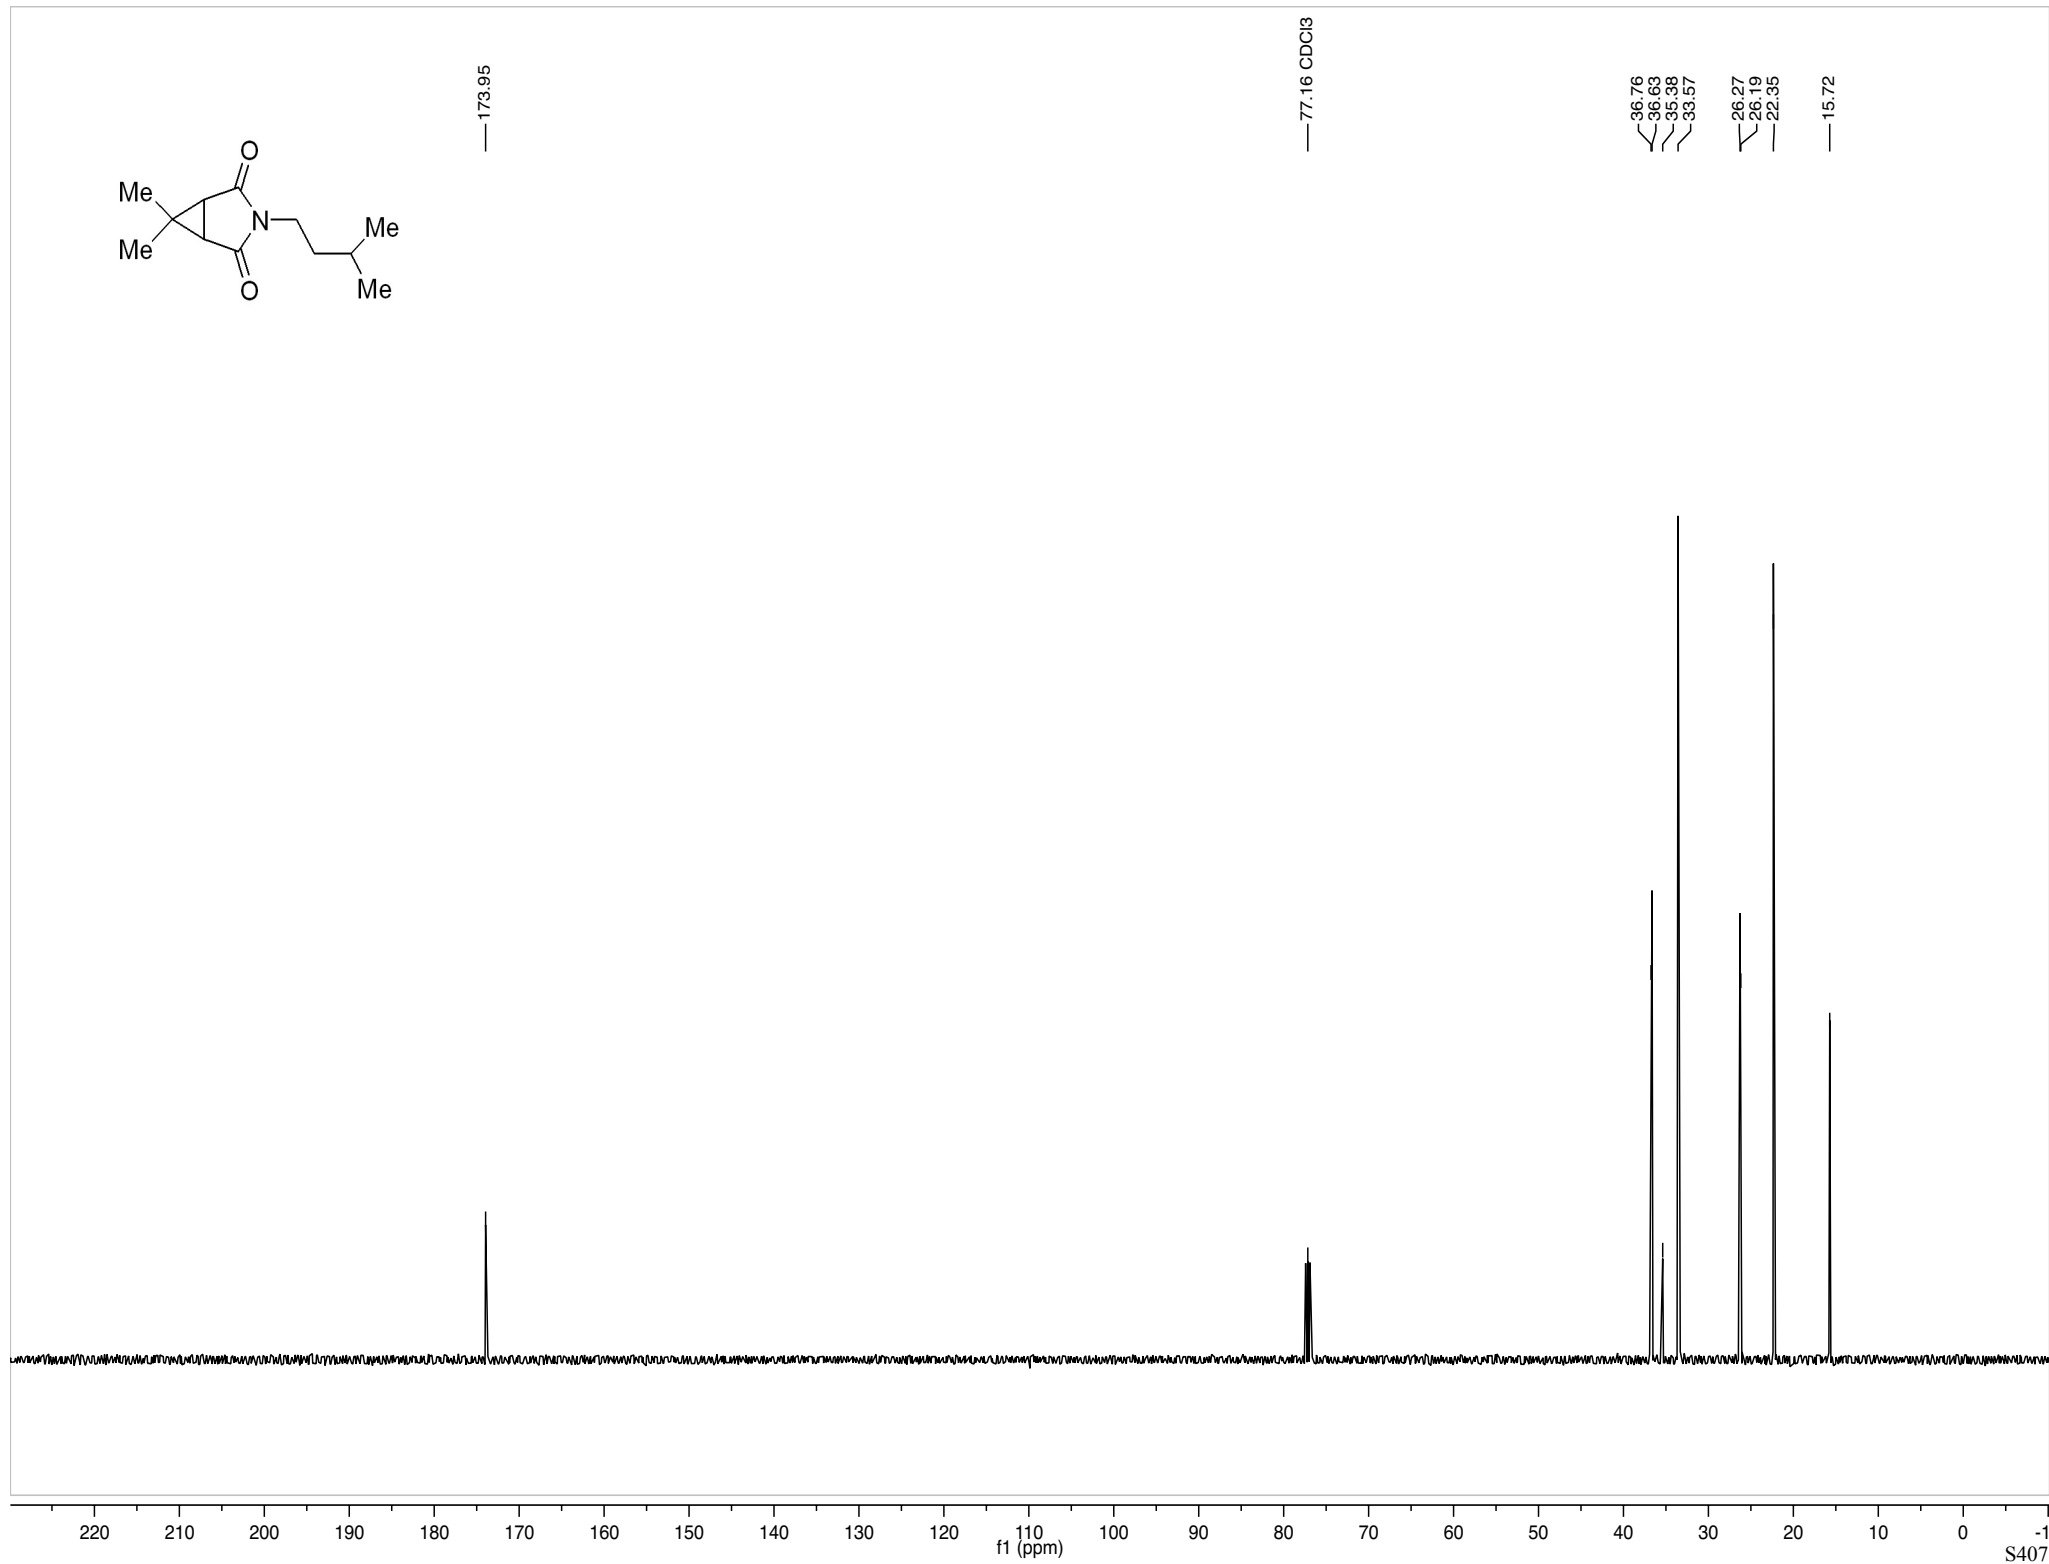



| Parameter                 | Value   |
|---------------------------|---------|
| 1 Origin                  | Varian  |
| 2 Spectrometer            | inova   |
| 3 Solvent                 | CDCl3   |
| 4 Temperature             | 20.0    |
| 5 Pulse Sequence          | s2pul   |
| 6 Experiment              | 1D      |
| 7 Probe                   | QUAD    |
| 8 Number of Scans         | 8       |
| 9 Receiver Gain           | 41      |
| 10 Relaxation Delay       | 0.0000  |
| 11 Pulse Width            | 0.0000  |
| 12 Acquisition Time       | 4.6645  |
| 13 Spectrometer Frequency | 499.69  |
| 14 Spectral Width         | 7024.9  |
| 15 Lowest Frequency       | -1021.4 |
| 16 Nucleus                | 1H      |
| 17 Acquired Size          | 32768   |
| 18 Spectral Size          | 65536   |

— 7.3 CDCl3

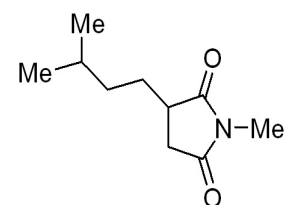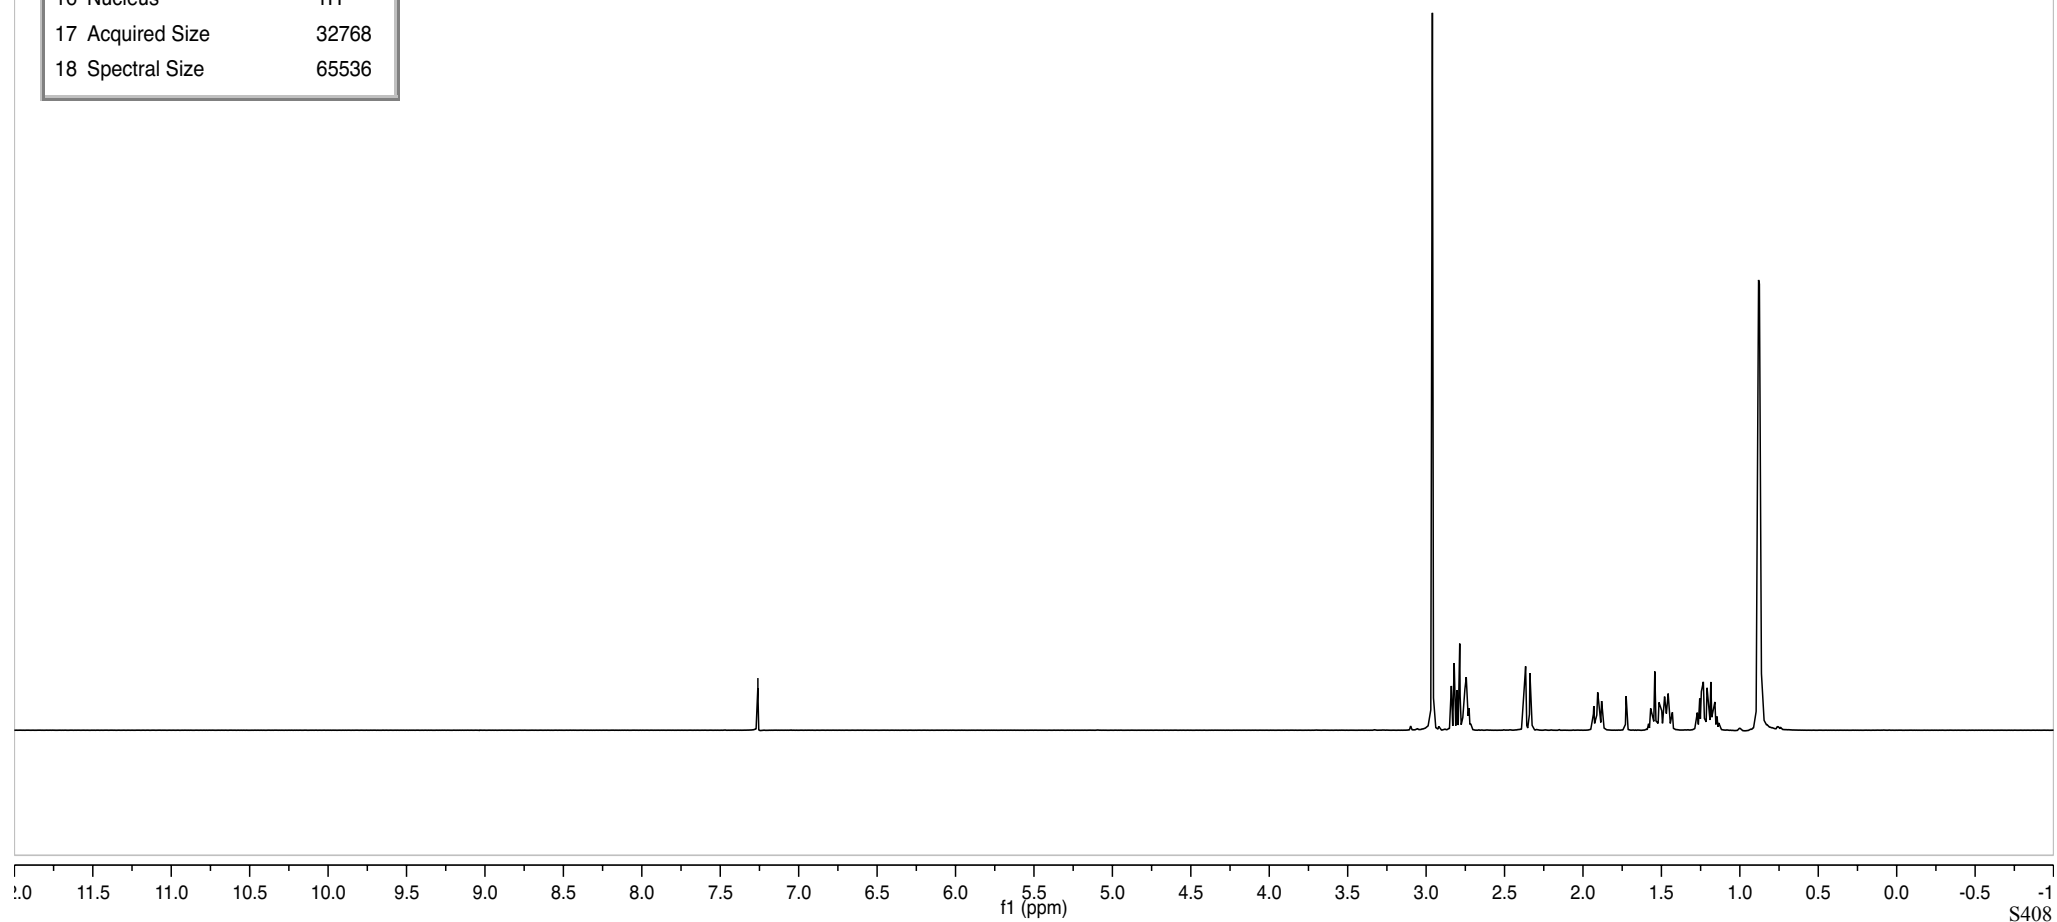

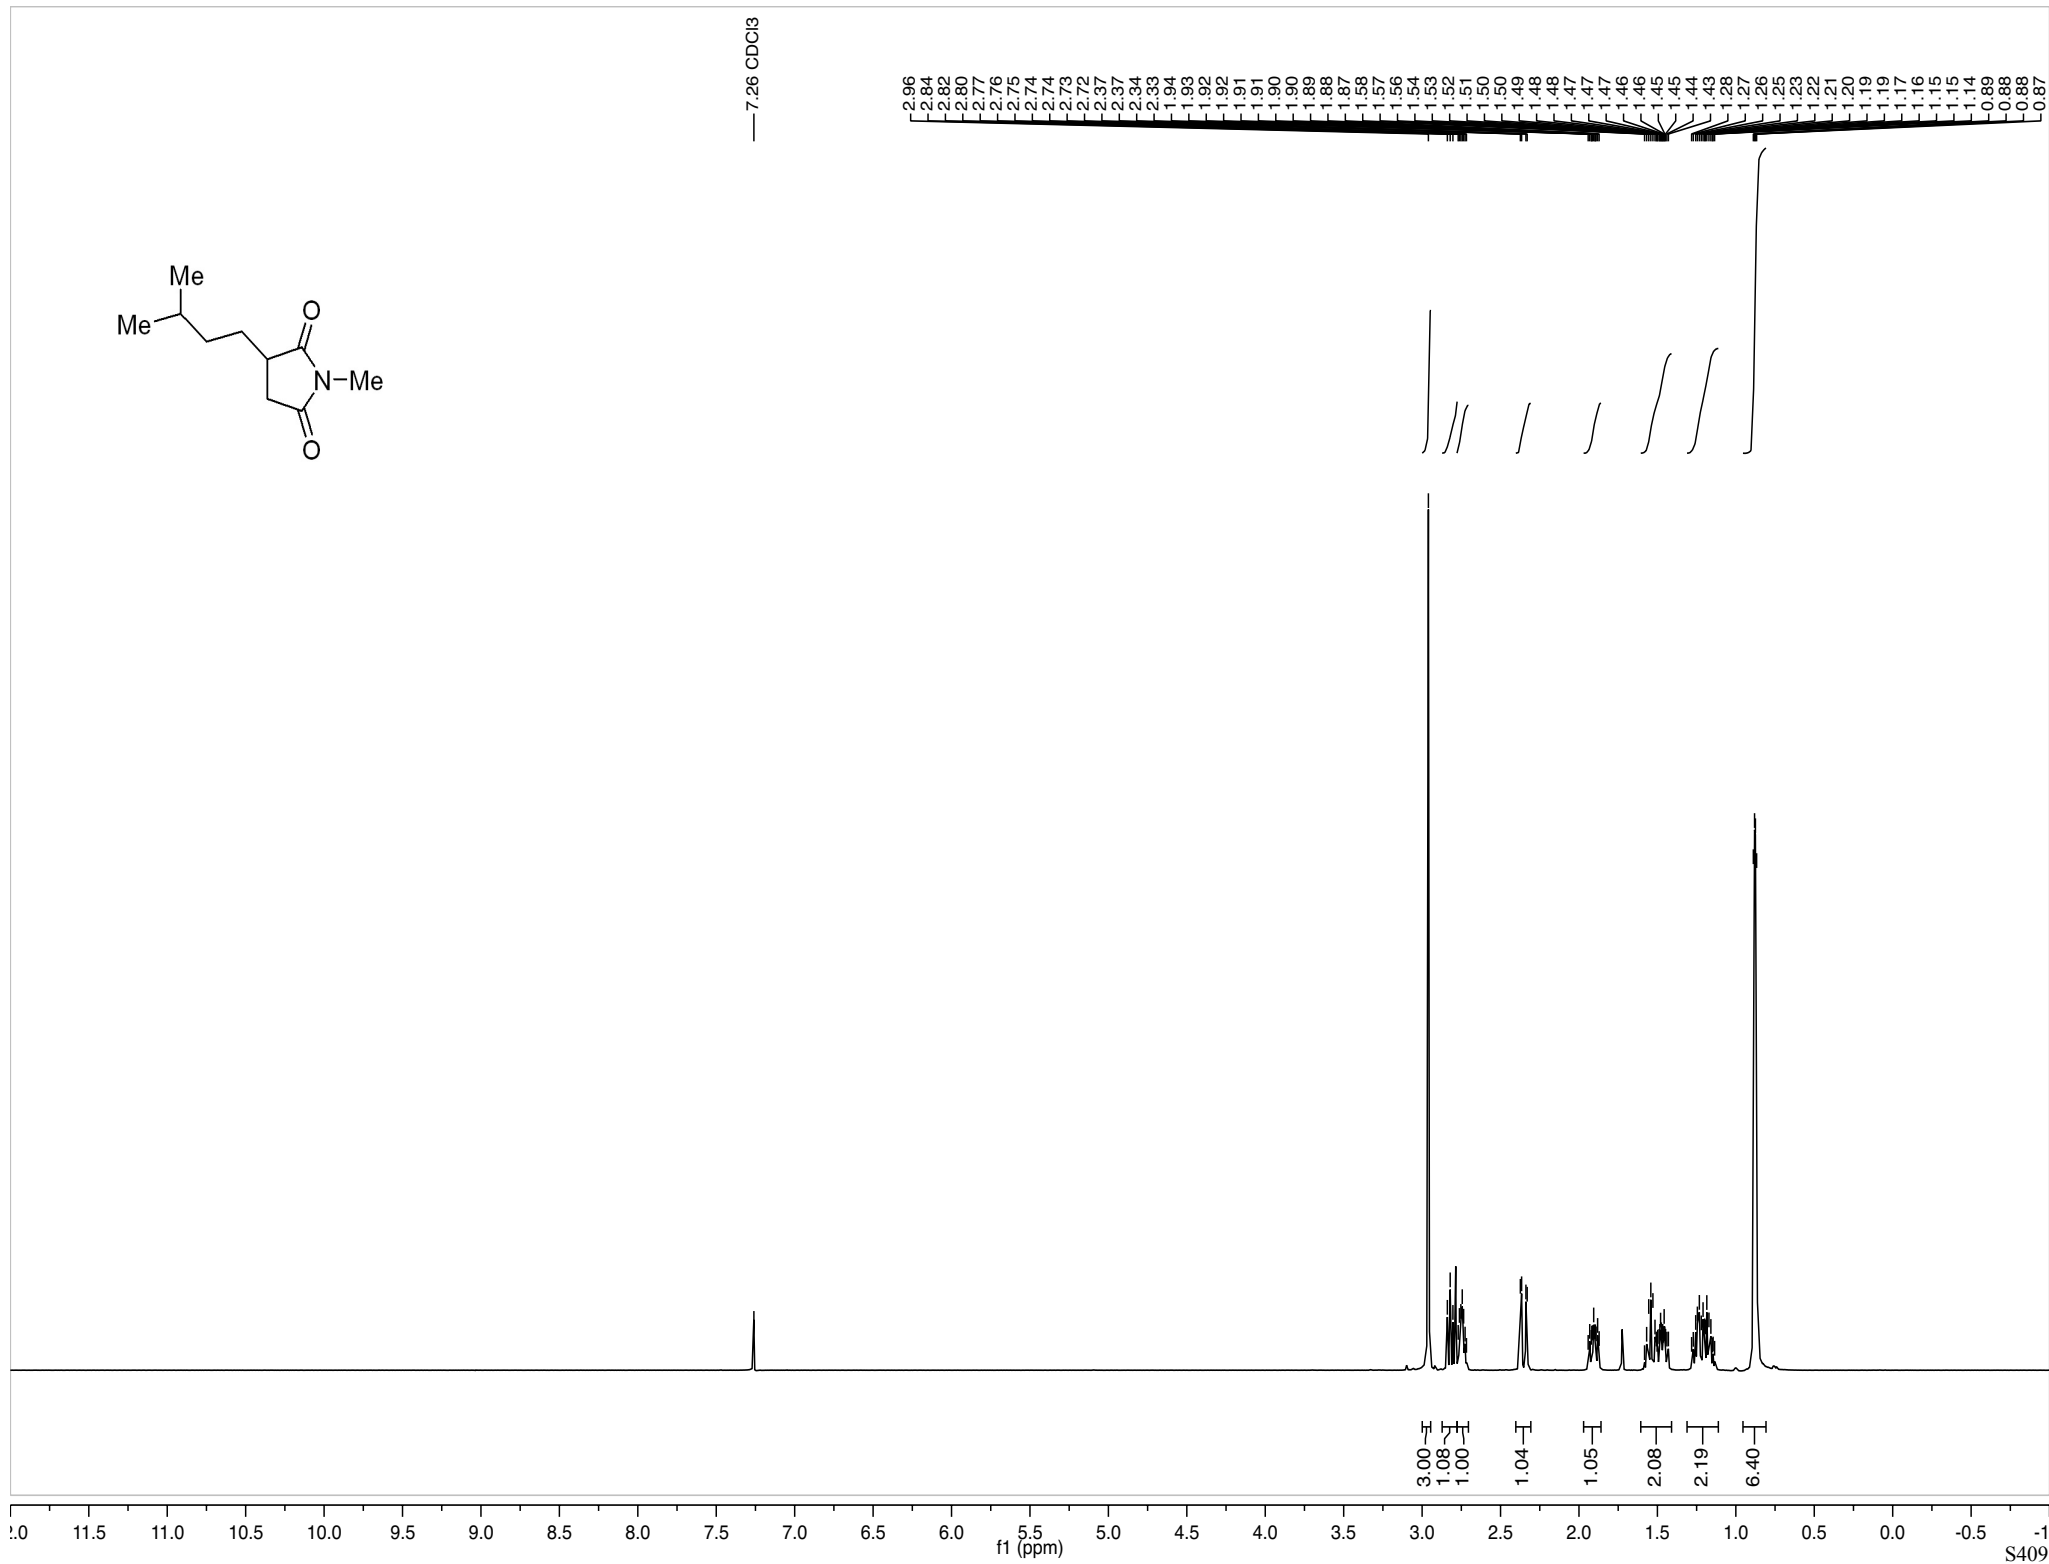

| Parameter                 | Value           |
|---------------------------|-----------------|
| 1 Origin                  | Varian          |
| 2 Spectrometer            | inova           |
| 3 Solvent                 | CDCl3           |
| 4 Temperature             | 20.0            |
| 5 Pulse Sequence          | s2pul           |
| 6 Experiment              | 1D              |
| 7 Probe                   | QUAD            |
| 8 Number of Scans         | 240             |
| 9 Receiver Gain           | 60              |
| 10 Relaxation Delay       | 1.0000          |
| 11 Pulse Width            | 0.0000          |
| 12 Acquisition Time       | 1.0863          |
| 13 Spectrometer Frequency | 125.66          |
| 14 Spectral Width         | 30165.9         |
| 15 Lowest Frequency       | -1276.4         |
| 16 Nucleus                | <sup>13</sup> C |
| 17 Acquired Size          | 32768           |
| 18 Spectral Size          | 65536           |

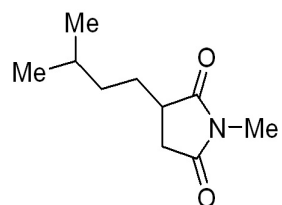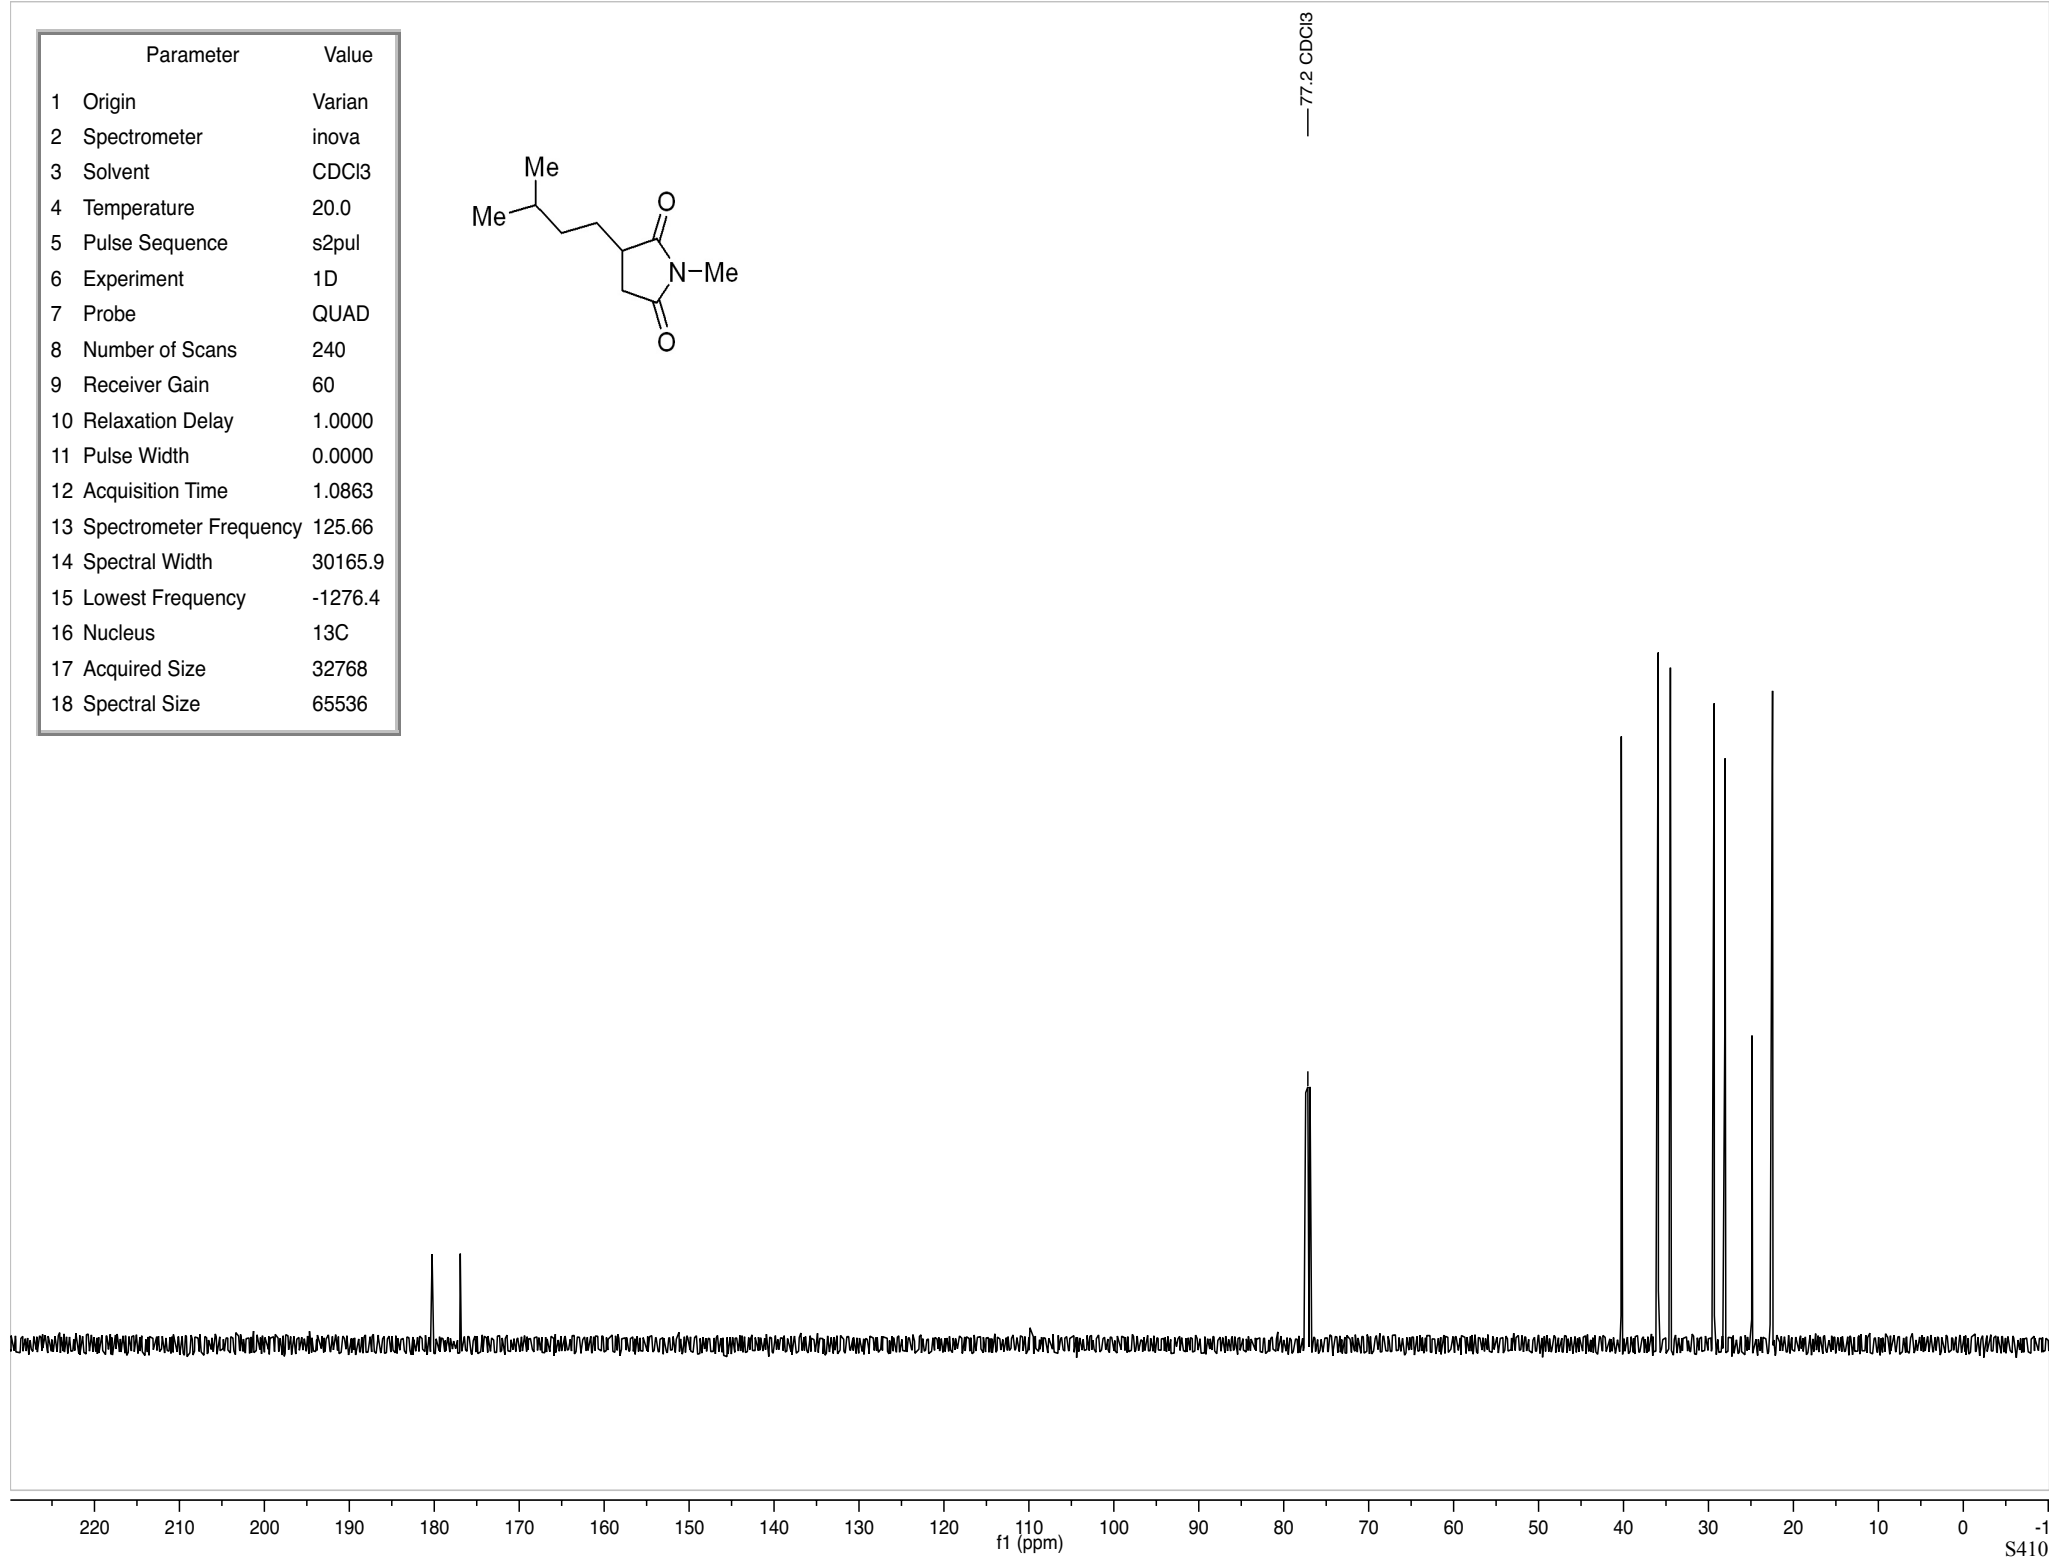

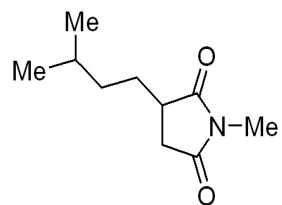

— 180.3  
— 176.9

— 77.2 CDCl<sub>3</sub>

— 40.3  
— 35.9  
— 34.5  
— 29.3  
— 28.0  
— 24.9  
— 22.6  
— 22.5

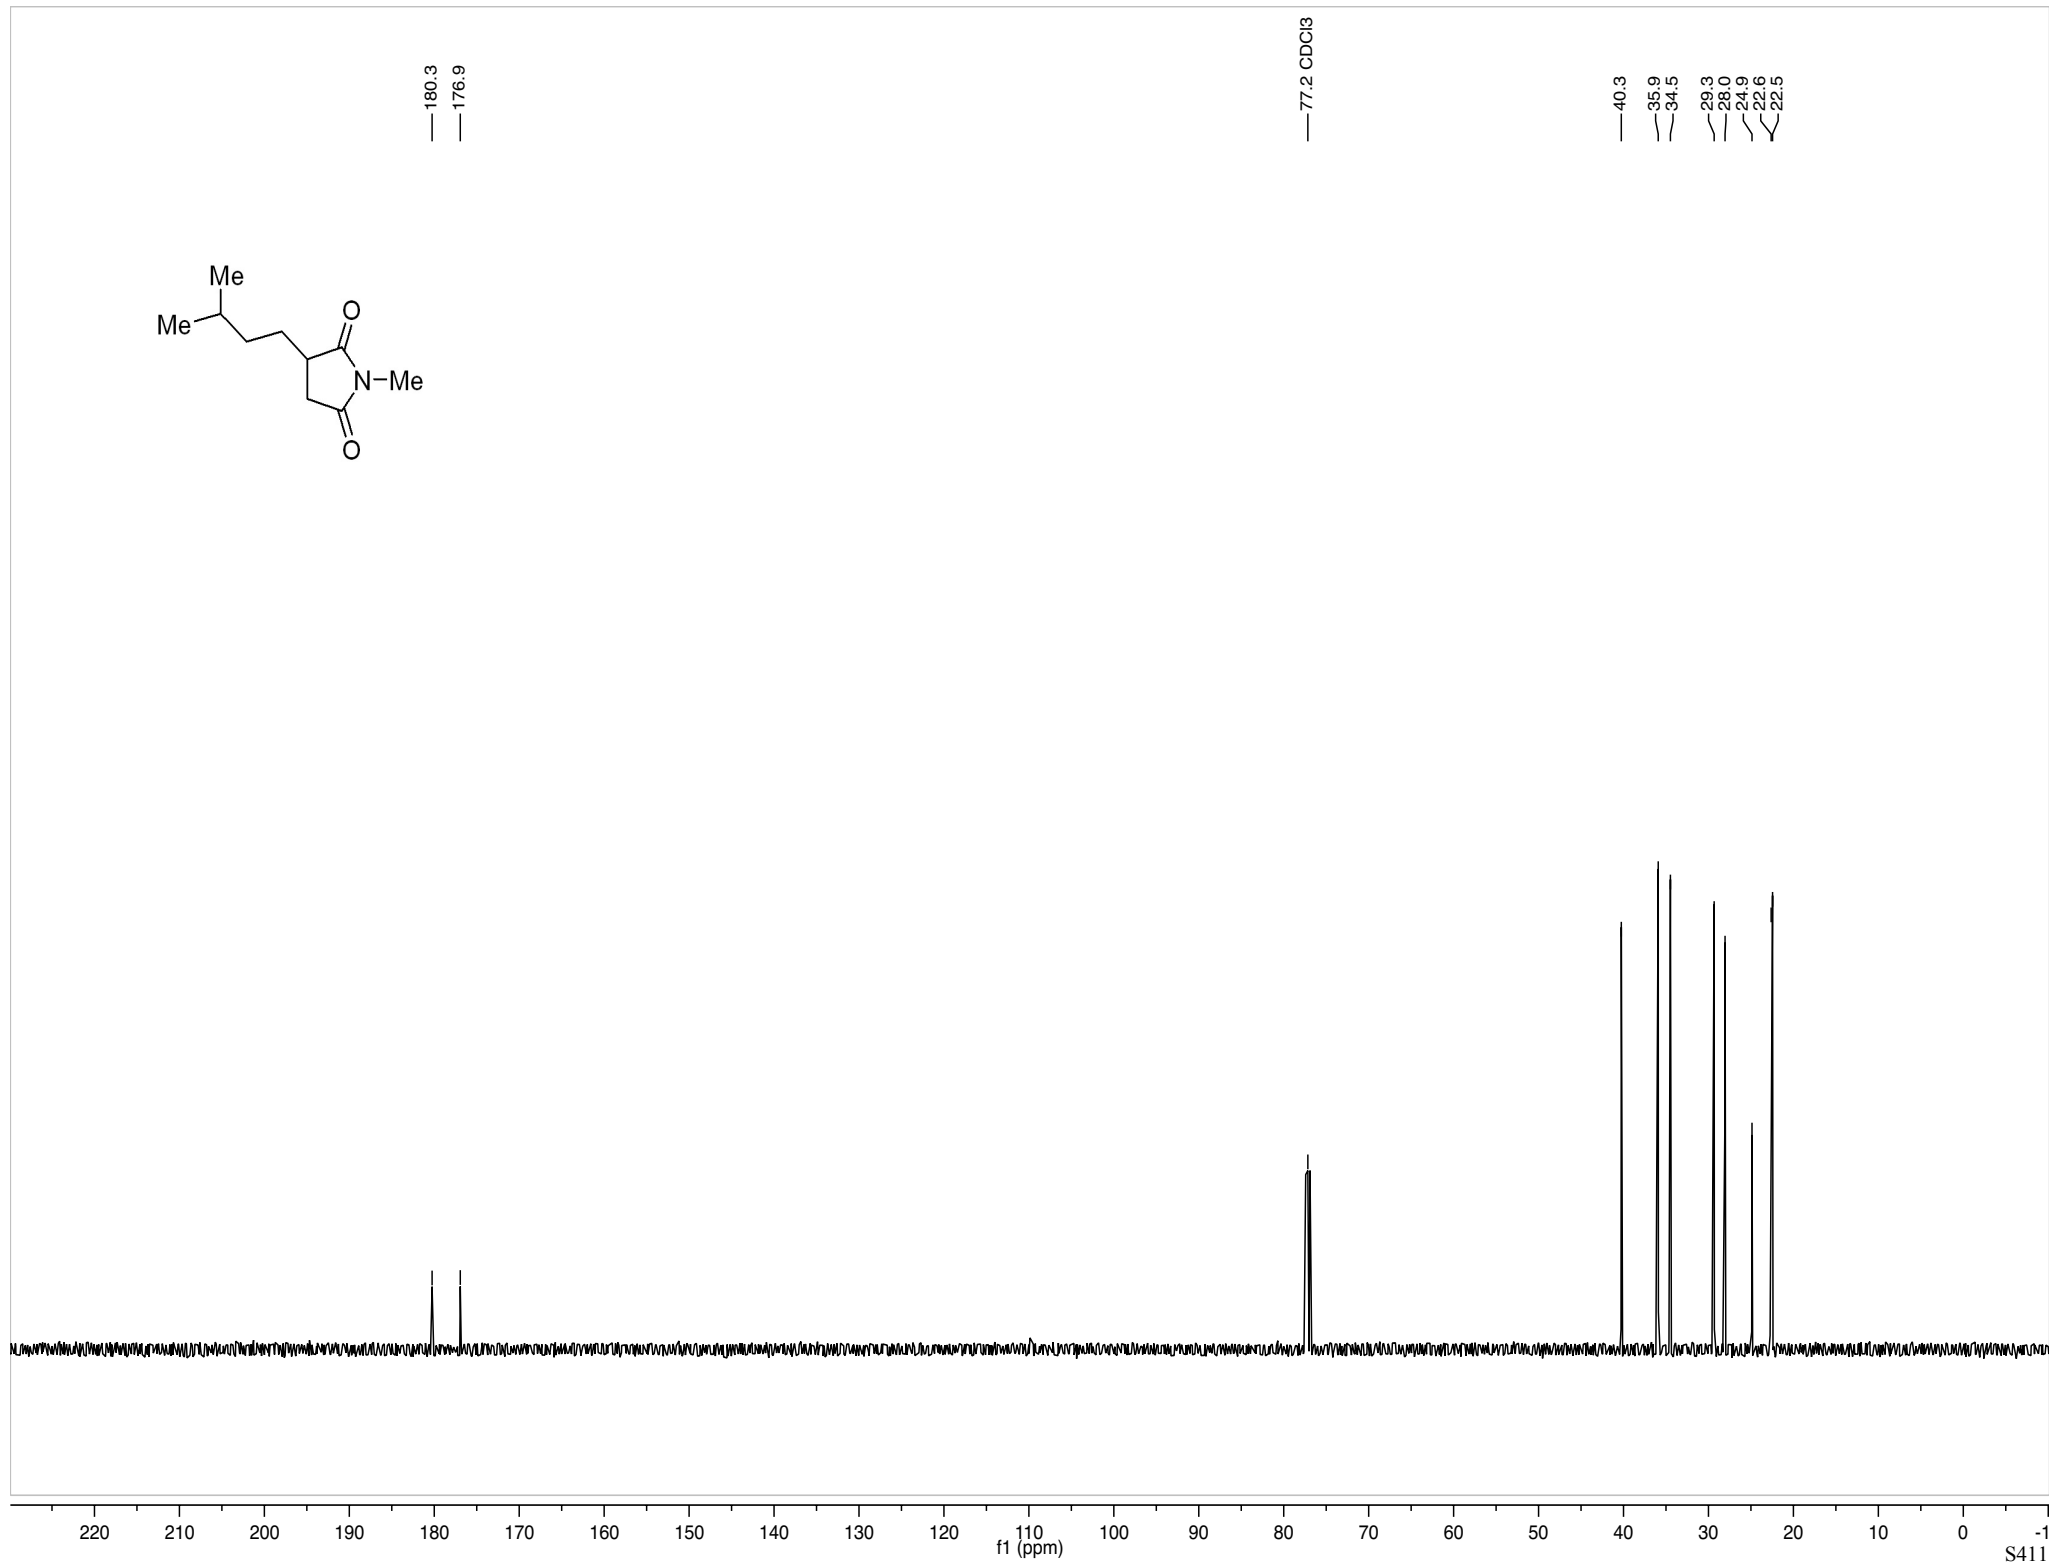

|    | Parameter              | Value          |
|----|------------------------|----------------|
| 1  | Origin                 | Varian         |
| 2  | Spectrometer           | inova          |
| 3  | Solvent                | CDCl3          |
| 4  | Temperature            | 40.0           |
| 5  | Pulse Sequence         | s2pul          |
| 6  | Experiment             | 1D             |
| 7  | Probe                  | QUAD           |
| 8  | Number of Scans        | 8              |
| 9  | Receiver Gain          | 50             |
| 10 | Relaxation Delay       | 0.0000         |
| 11 | Pulse Width            | 0.0000         |
| 12 | Acquisition Time       | 4.6645         |
| 13 | Spectrometer Frequency | 499.69         |
| 14 | Spectral Width         | 7024.9         |
| 15 | Lowest Frequency       | -1011.4        |
| 16 | Nucleus                | <sup>1</sup> H |
| 17 | Acquired Size          | 32768          |
| 18 | Spectral Size          | 65536          |

— 7.26 CDCl<sub>3</sub>

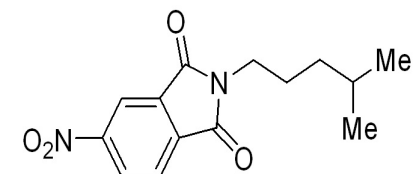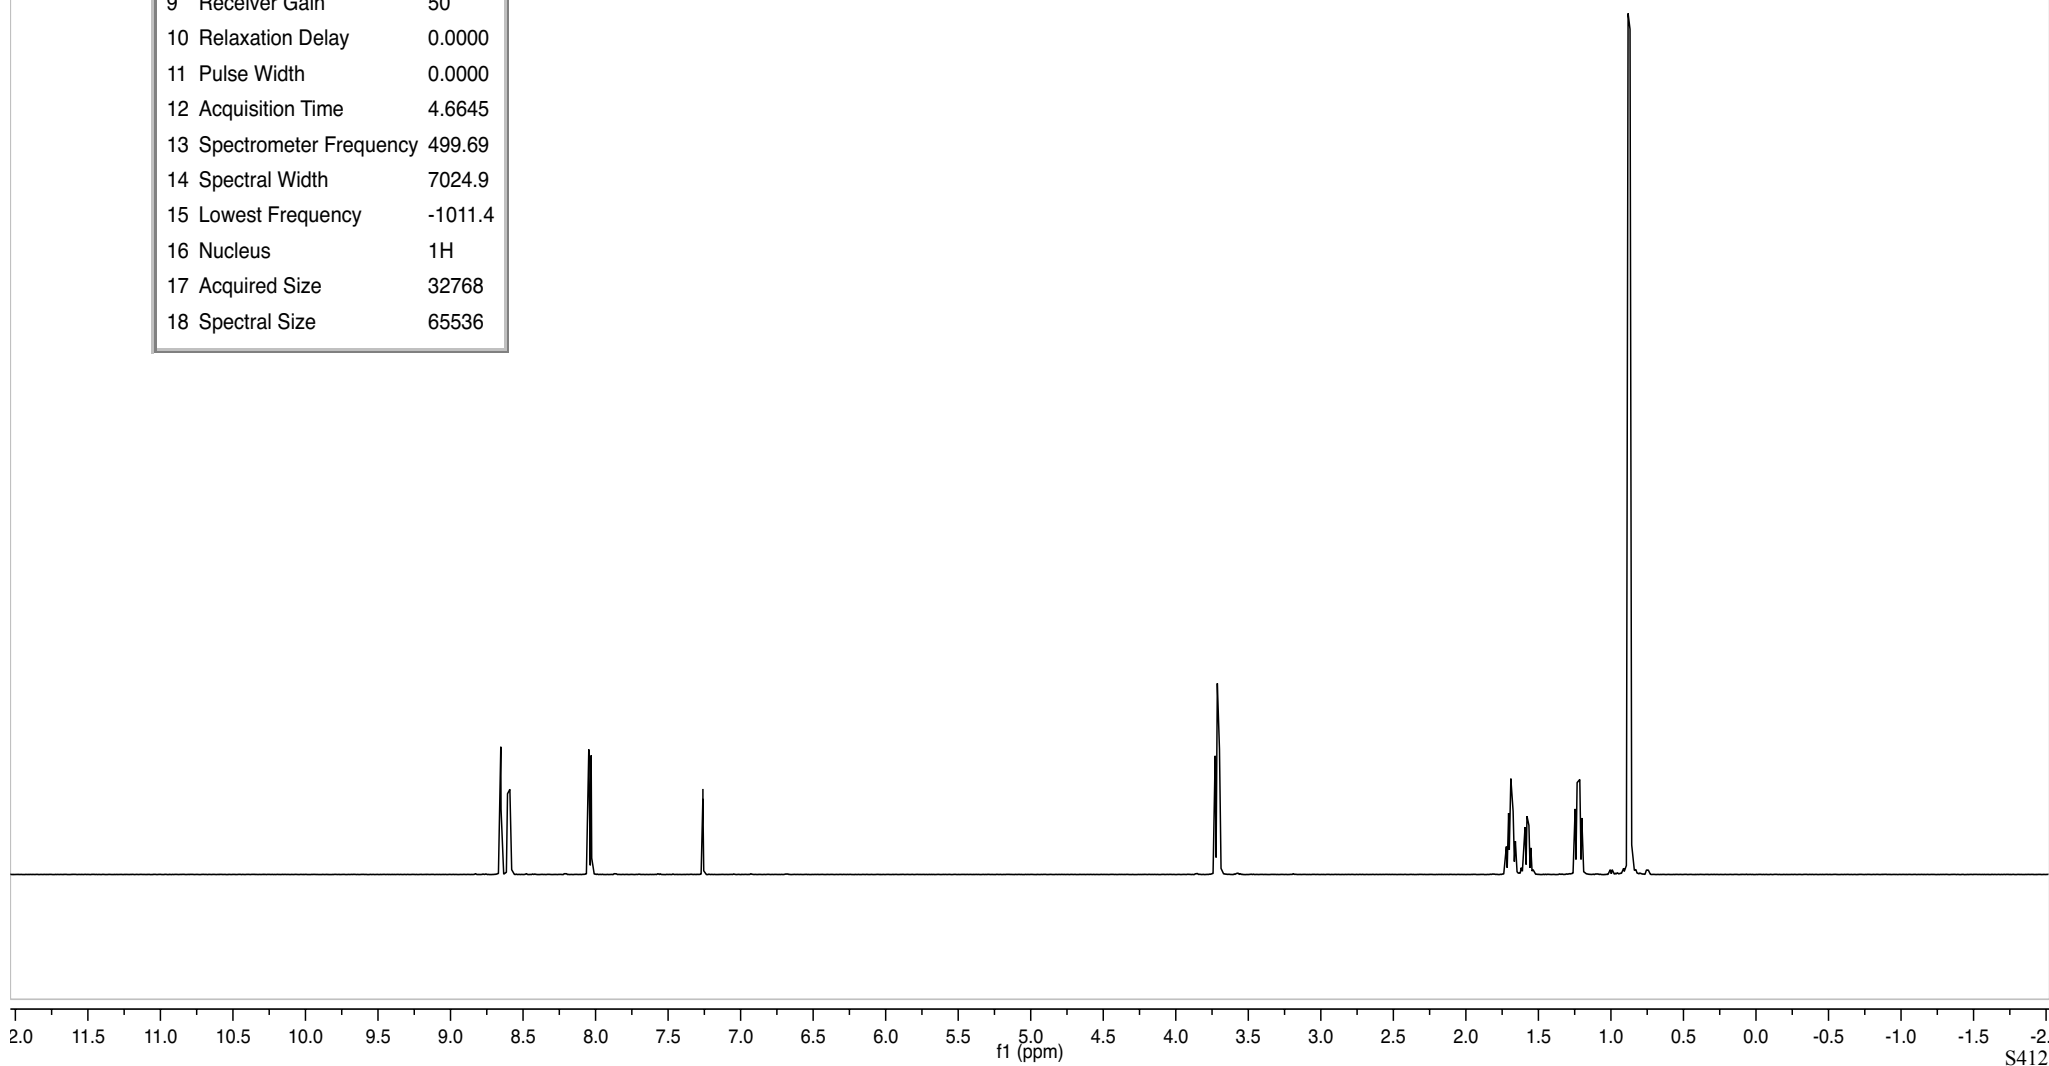

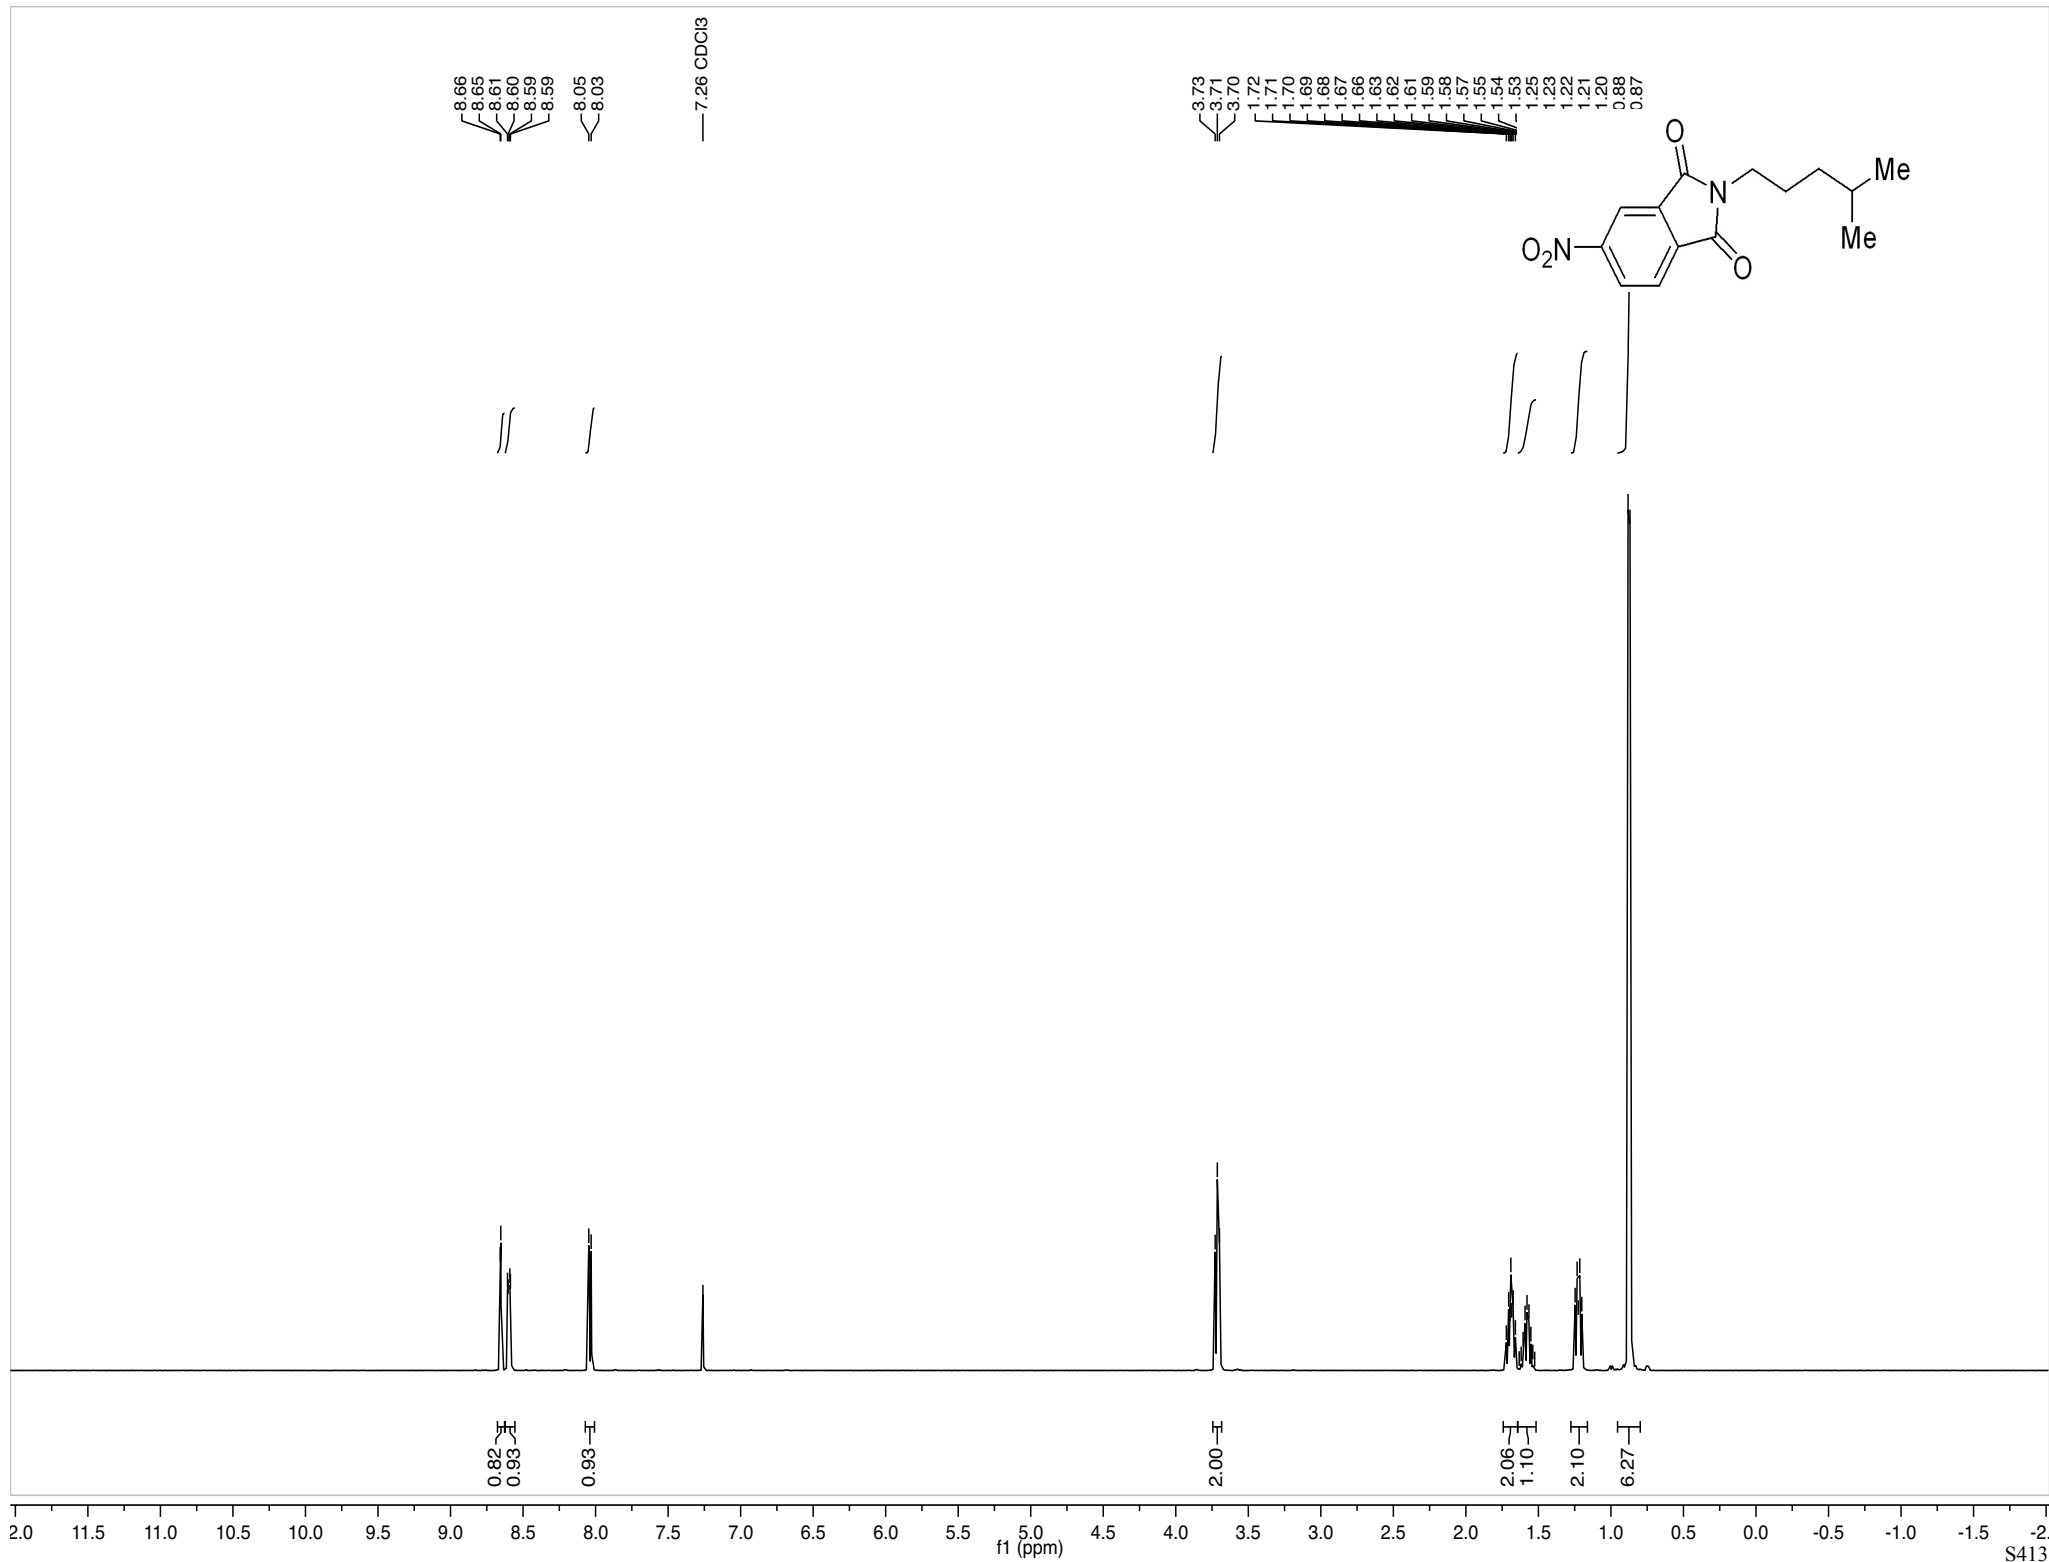

|    | Parameter              | Value   |
|----|------------------------|---------|
| 1  | Origin                 | Varian  |
| 2  | Spectrometer           | inova   |
| 3  | Solvent                | CDCl3   |
| 4  | Temperature            | 40.0    |
| 5  | Pulse Sequence         | s2pul   |
| 6  | Experiment             | 1D      |
| 7  | Probe                  | QUAD    |
| 8  | Number of Scans        | 224     |
| 9  | Receiver Gain          | 60      |
| 10 | Relaxation Delay       | 1.0000  |
| 11 | Pulse Width            | 0.0000  |
| 12 | Acquisition Time       | 1.0863  |
| 13 | Spectrometer Frequency | 125.66  |
| 14 | Spectral Width         | 30165.9 |
| 15 | Lowest Frequency       | -1260.2 |
| 16 | Nucleus                | 13C     |
| 17 | Acquired Size          | 32768   |
| 18 | Spectral Size          | 65536   |

— 77.16 CDCl3

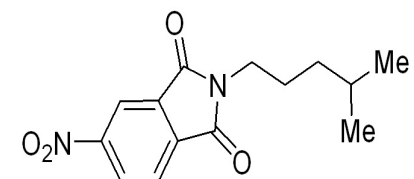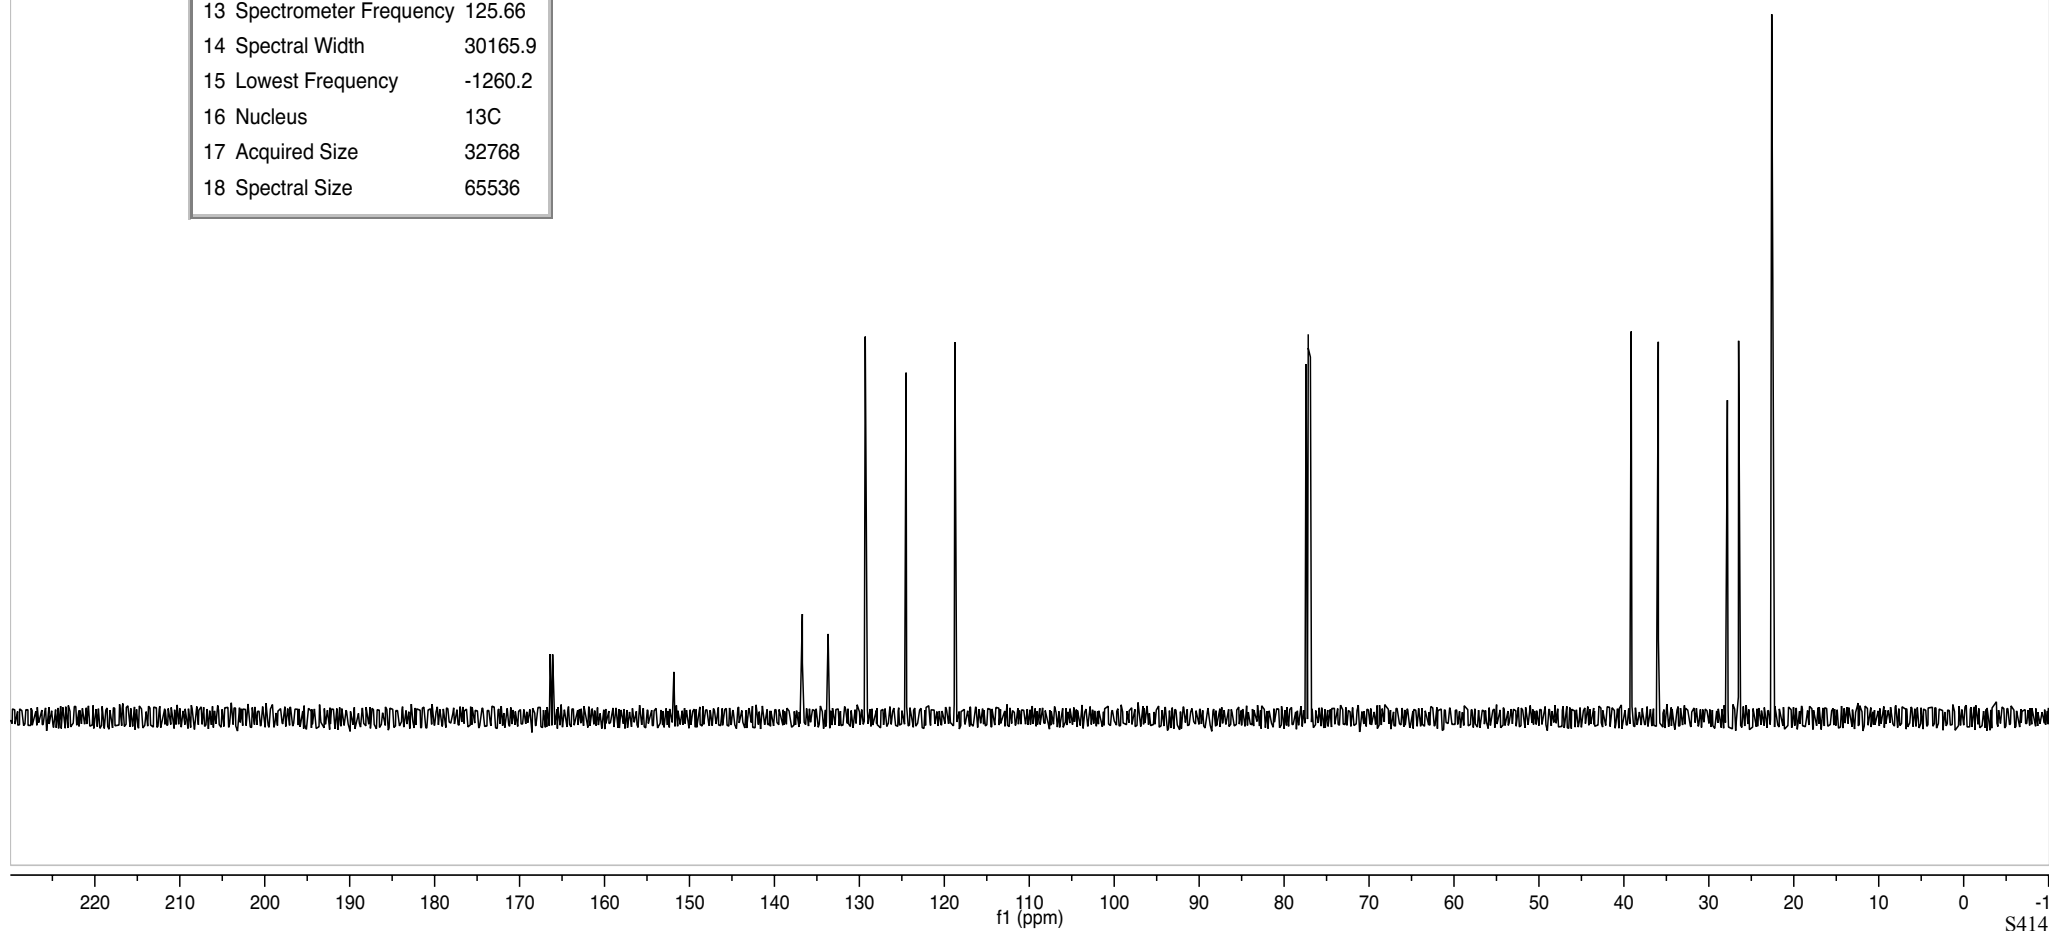

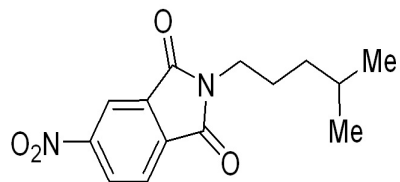

166.4  
166.1

151.8

136.7

133.7

129.3

124.5

118.8

77.2 CDCl<sub>3</sub>

39.1

35.9

27.8

26.5

22.6

220

210

200

190

180

170

160

150

140

130

120

110

100

90

80

70

60

50

40

30

20

10

0

-1

f1 (ppm)

S415



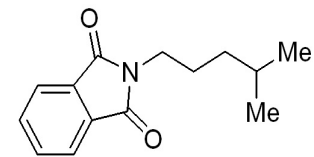

— 7.26 CDCl<sub>3</sub>

| Parameter                 | Value             |
|---------------------------|-------------------|
| 1 Origin                  | Varian            |
| 2 Spectrometer            | inova             |
| 3 Solvent                 | CDCl <sub>3</sub> |
| 4 Temperature             | 40.0              |
| 5 Pulse Sequence          | s2pul             |
| 6 Experiment              | 1D                |
| 7 Probe                   | QUAD              |
| 8 Number of Scans         | 8                 |
| 9 Receiver Gain           | 41                |
| 10 Relaxation Delay       | 0.0000            |
| 11 Pulse Width            | 0.0000            |
| 12 Acquisition Time       | 4.6645            |
| 13 Spectrometer Frequency | 499.69            |
| 14 Spectral Width         | 7024.9            |
| 15 Lowest Frequency       | -1011.4           |
| 16 Nucleus                | <sup>1</sup> H    |
| 17 Acquired Size          | 32768             |
| 18 Spectral Size          | 65536             |

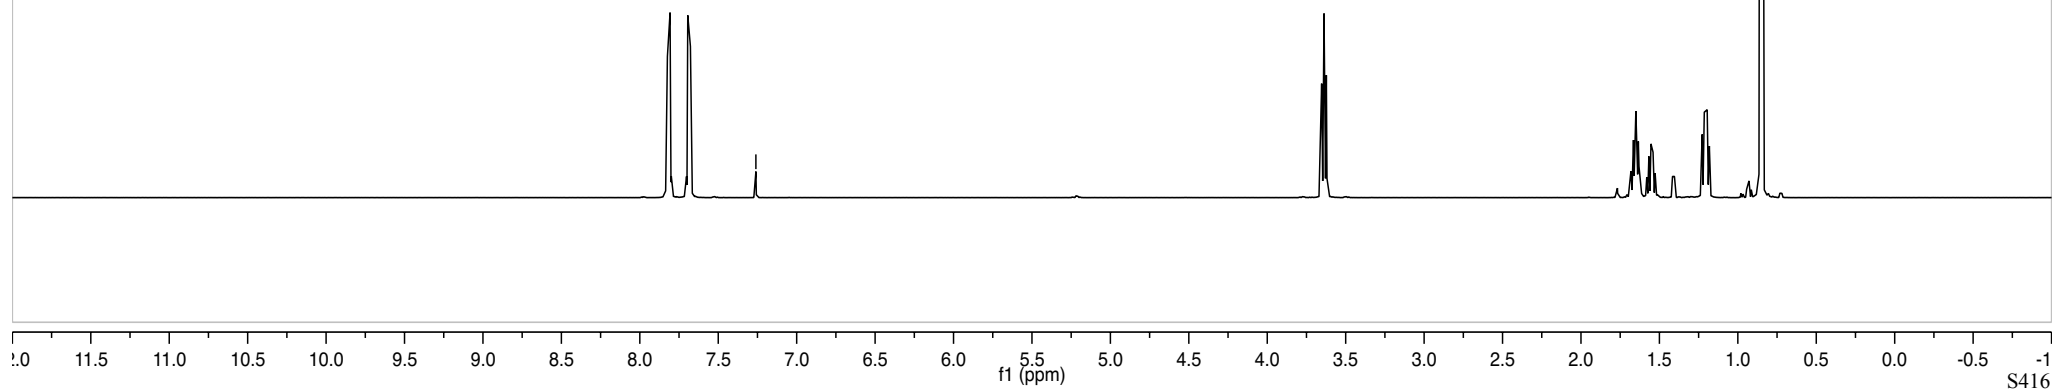

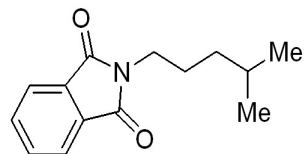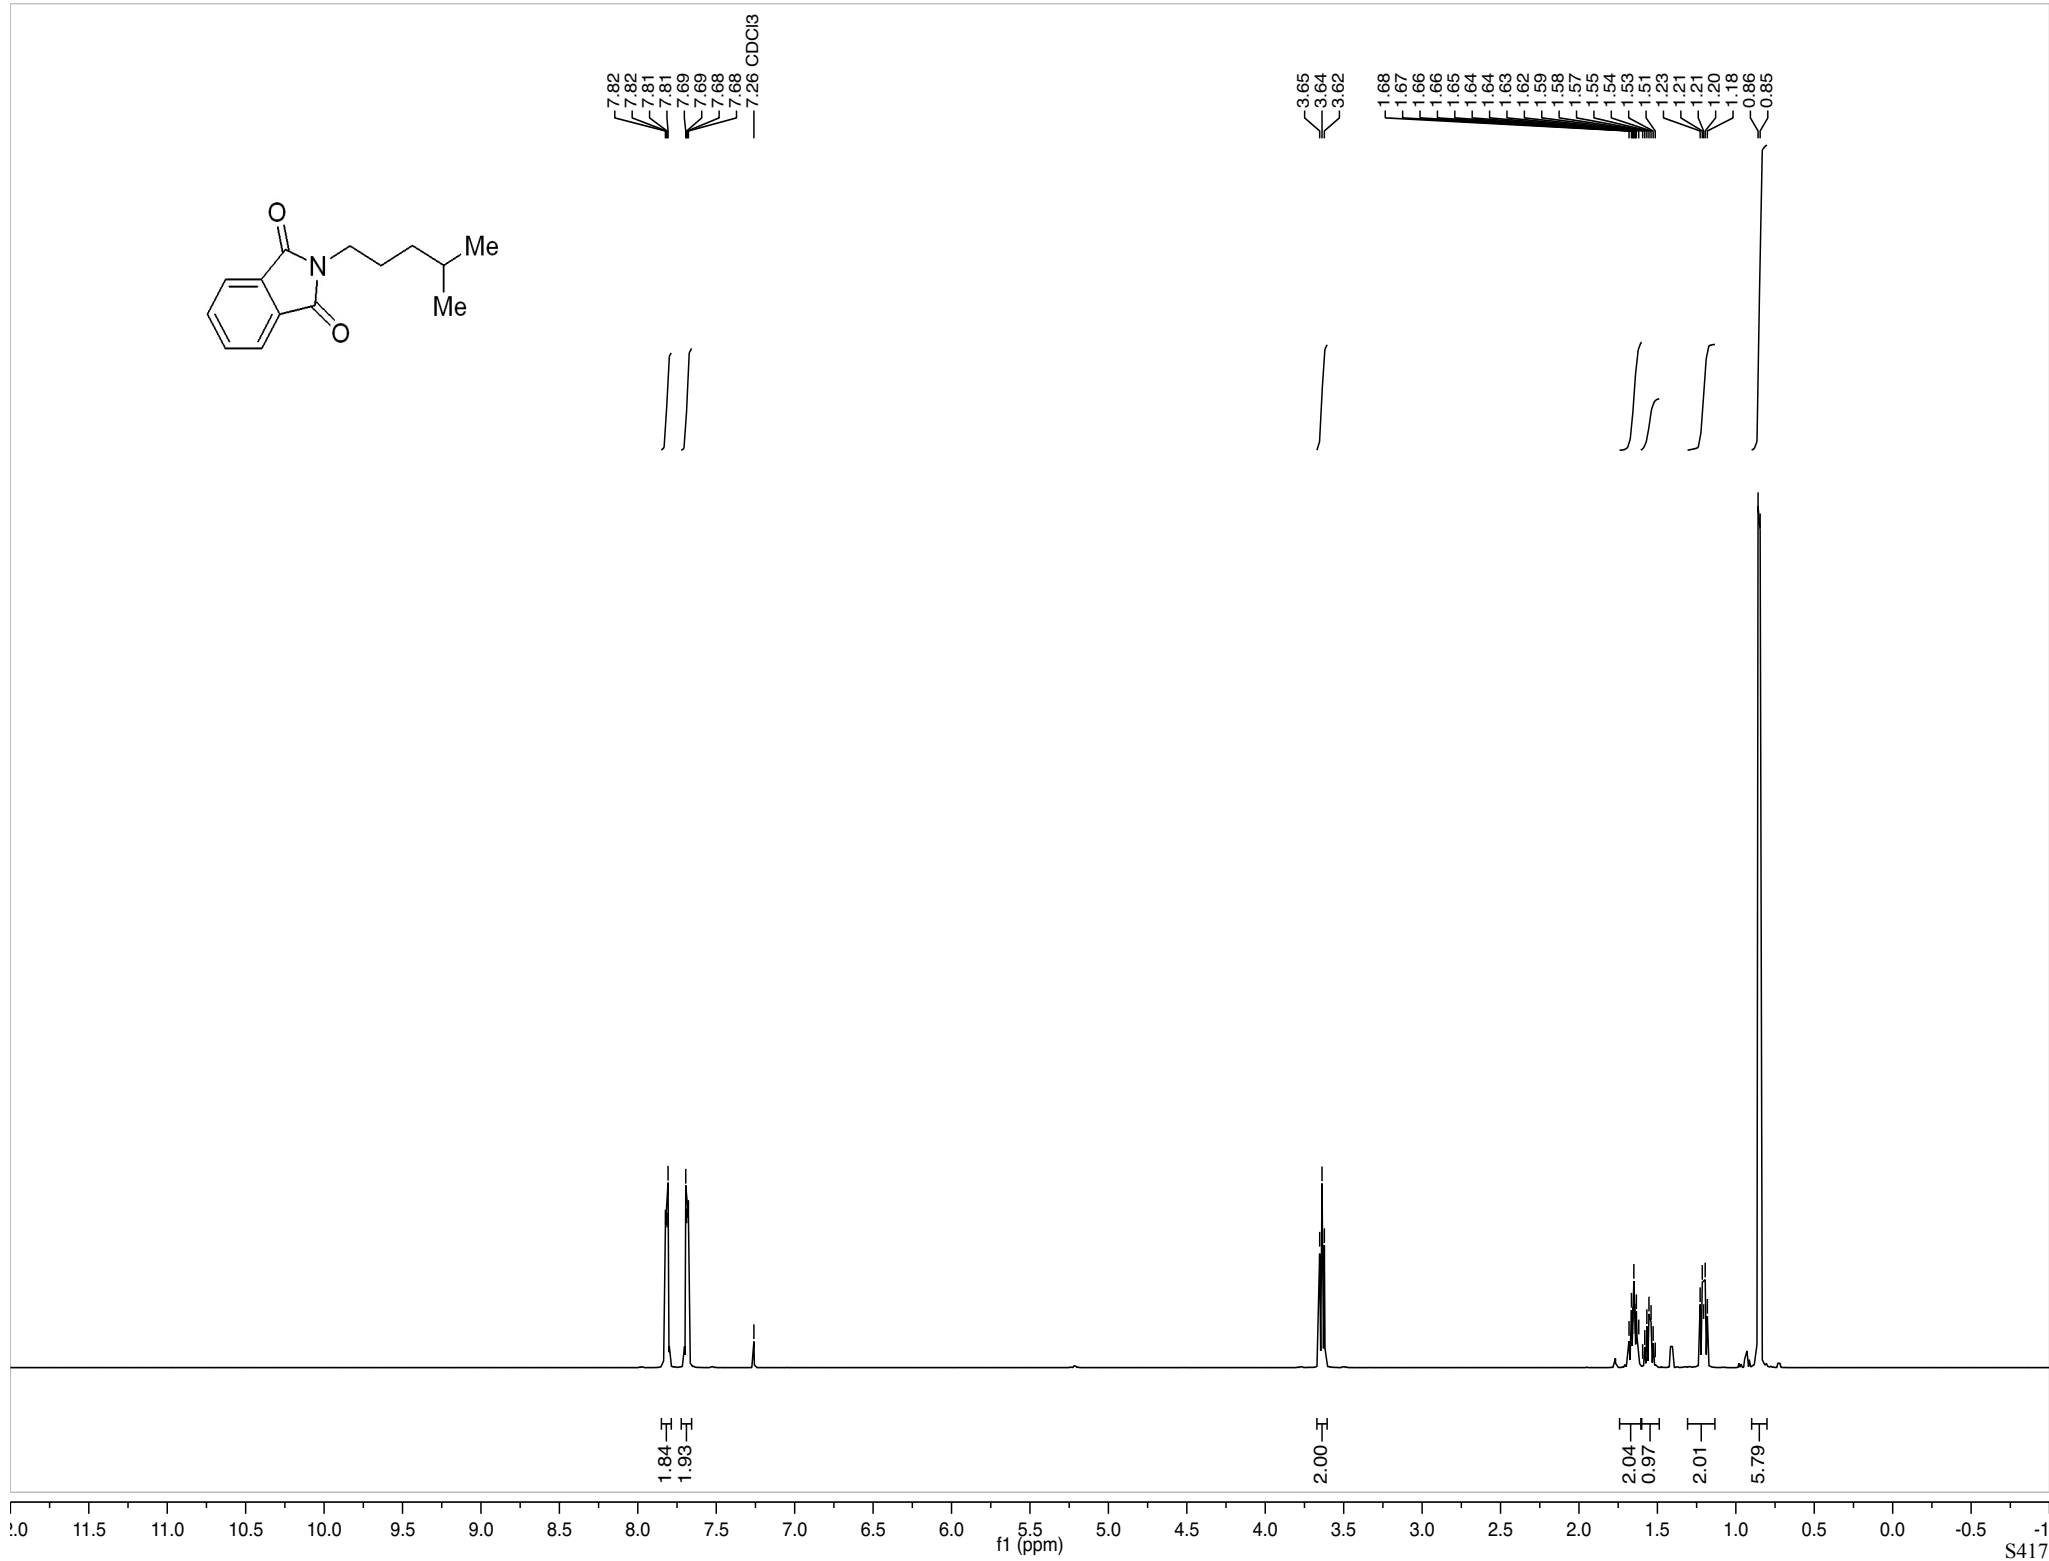

|    | Parameter              | Value   |
|----|------------------------|---------|
| 1  | Origin                 | Varian  |
| 2  | Spectrometer           | inova   |
| 3  | Solvent                | CDCl3   |
| 4  | Temperature            | 40.0    |
| 5  | Pulse Sequence         | s2pul   |
| 6  | Experiment             | 1D      |
| 7  | Probe                  | QUAD    |
| 8  | Number of Scans        | 48      |
| 9  | Receiver Gain          | 60      |
| 10 | Relaxation Delay       | 1.0000  |
| 11 | Pulse Width            | 0.0000  |
| 12 | Acquisition Time       | 1.0863  |
| 13 | Spectrometer Frequency | 125.66  |
| 14 | Spectral Width         | 30165.9 |
| 15 | Lowest Frequency       | -1260.2 |
| 16 | Nucleus                | 13C     |
| 17 | Acquired Size          | 32768   |
| 18 | Spectral Size          | 65536   |

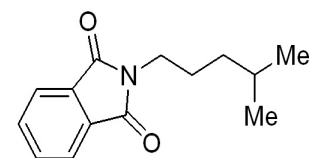

— 77.2 CDCl3

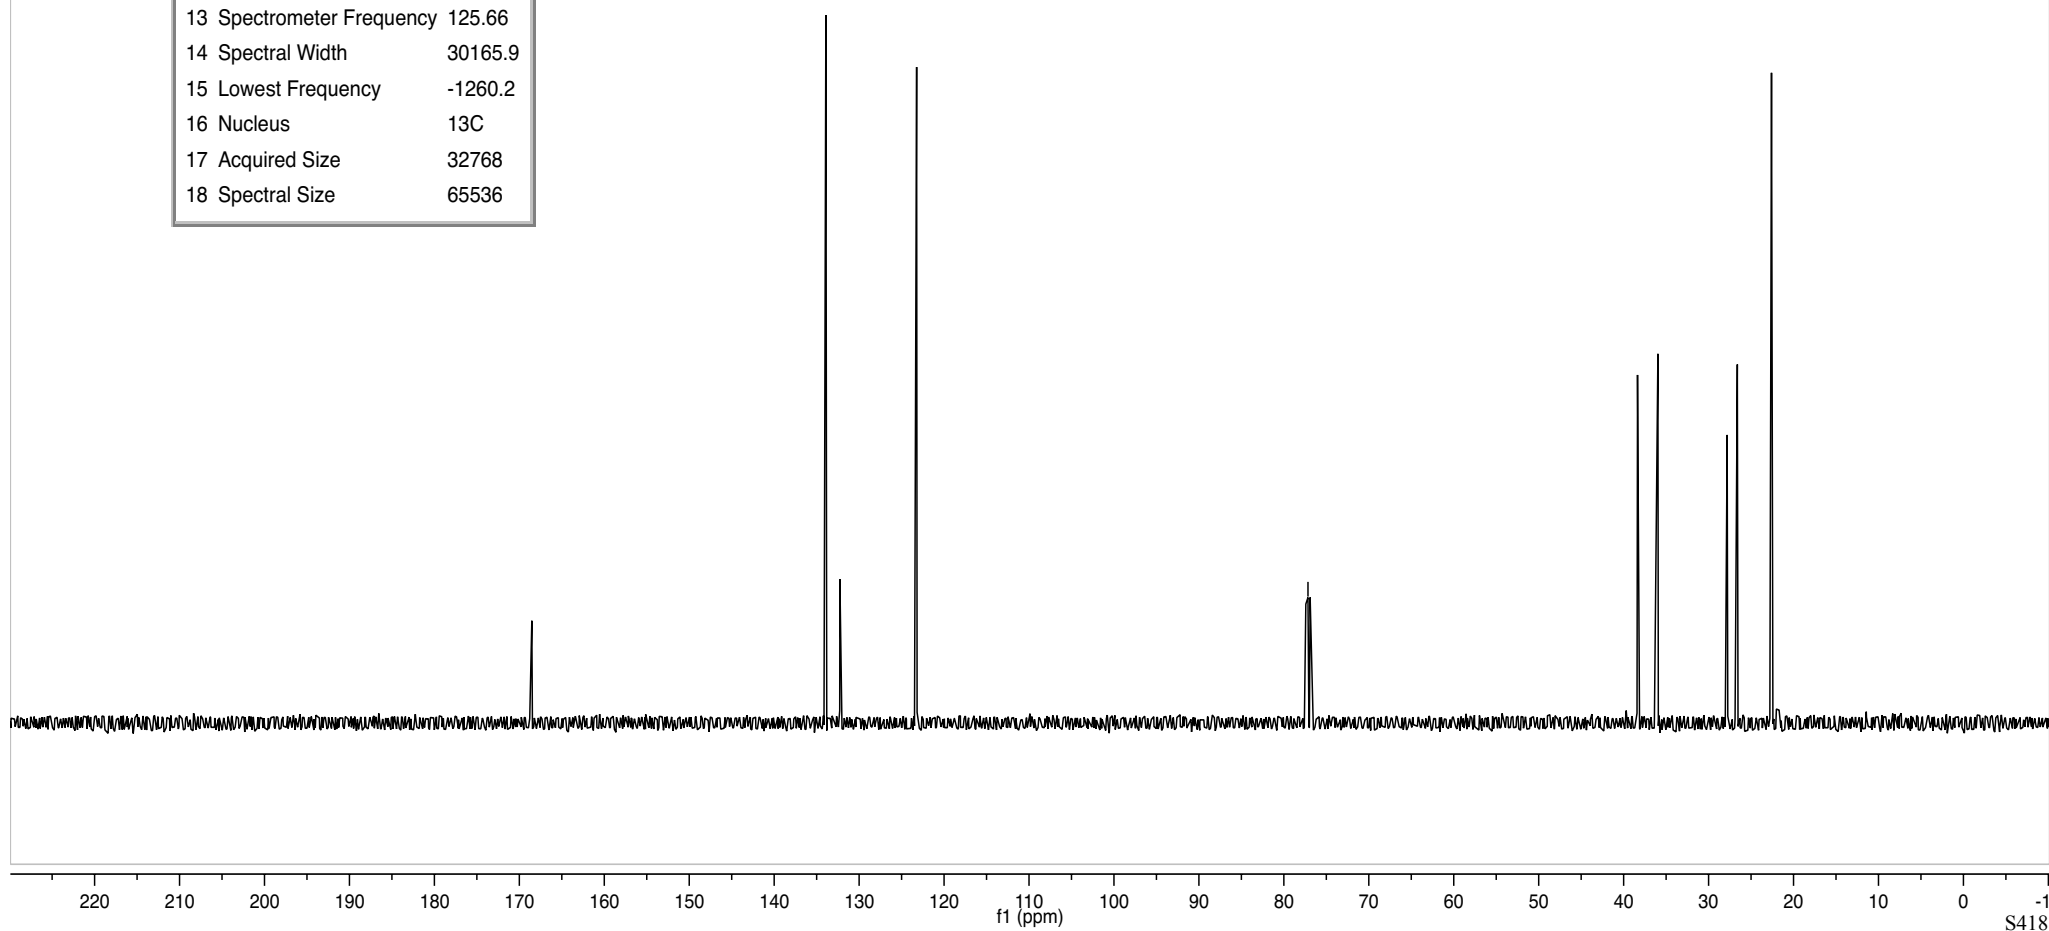

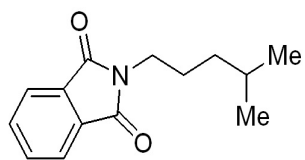

— 168.5

— 133.9  
— 132.3

— 123.2

— 77.2 CDCl<sub>3</sub>

— 38.4  
— 36.0

— 27.8  
— 26.6  
— 22.6

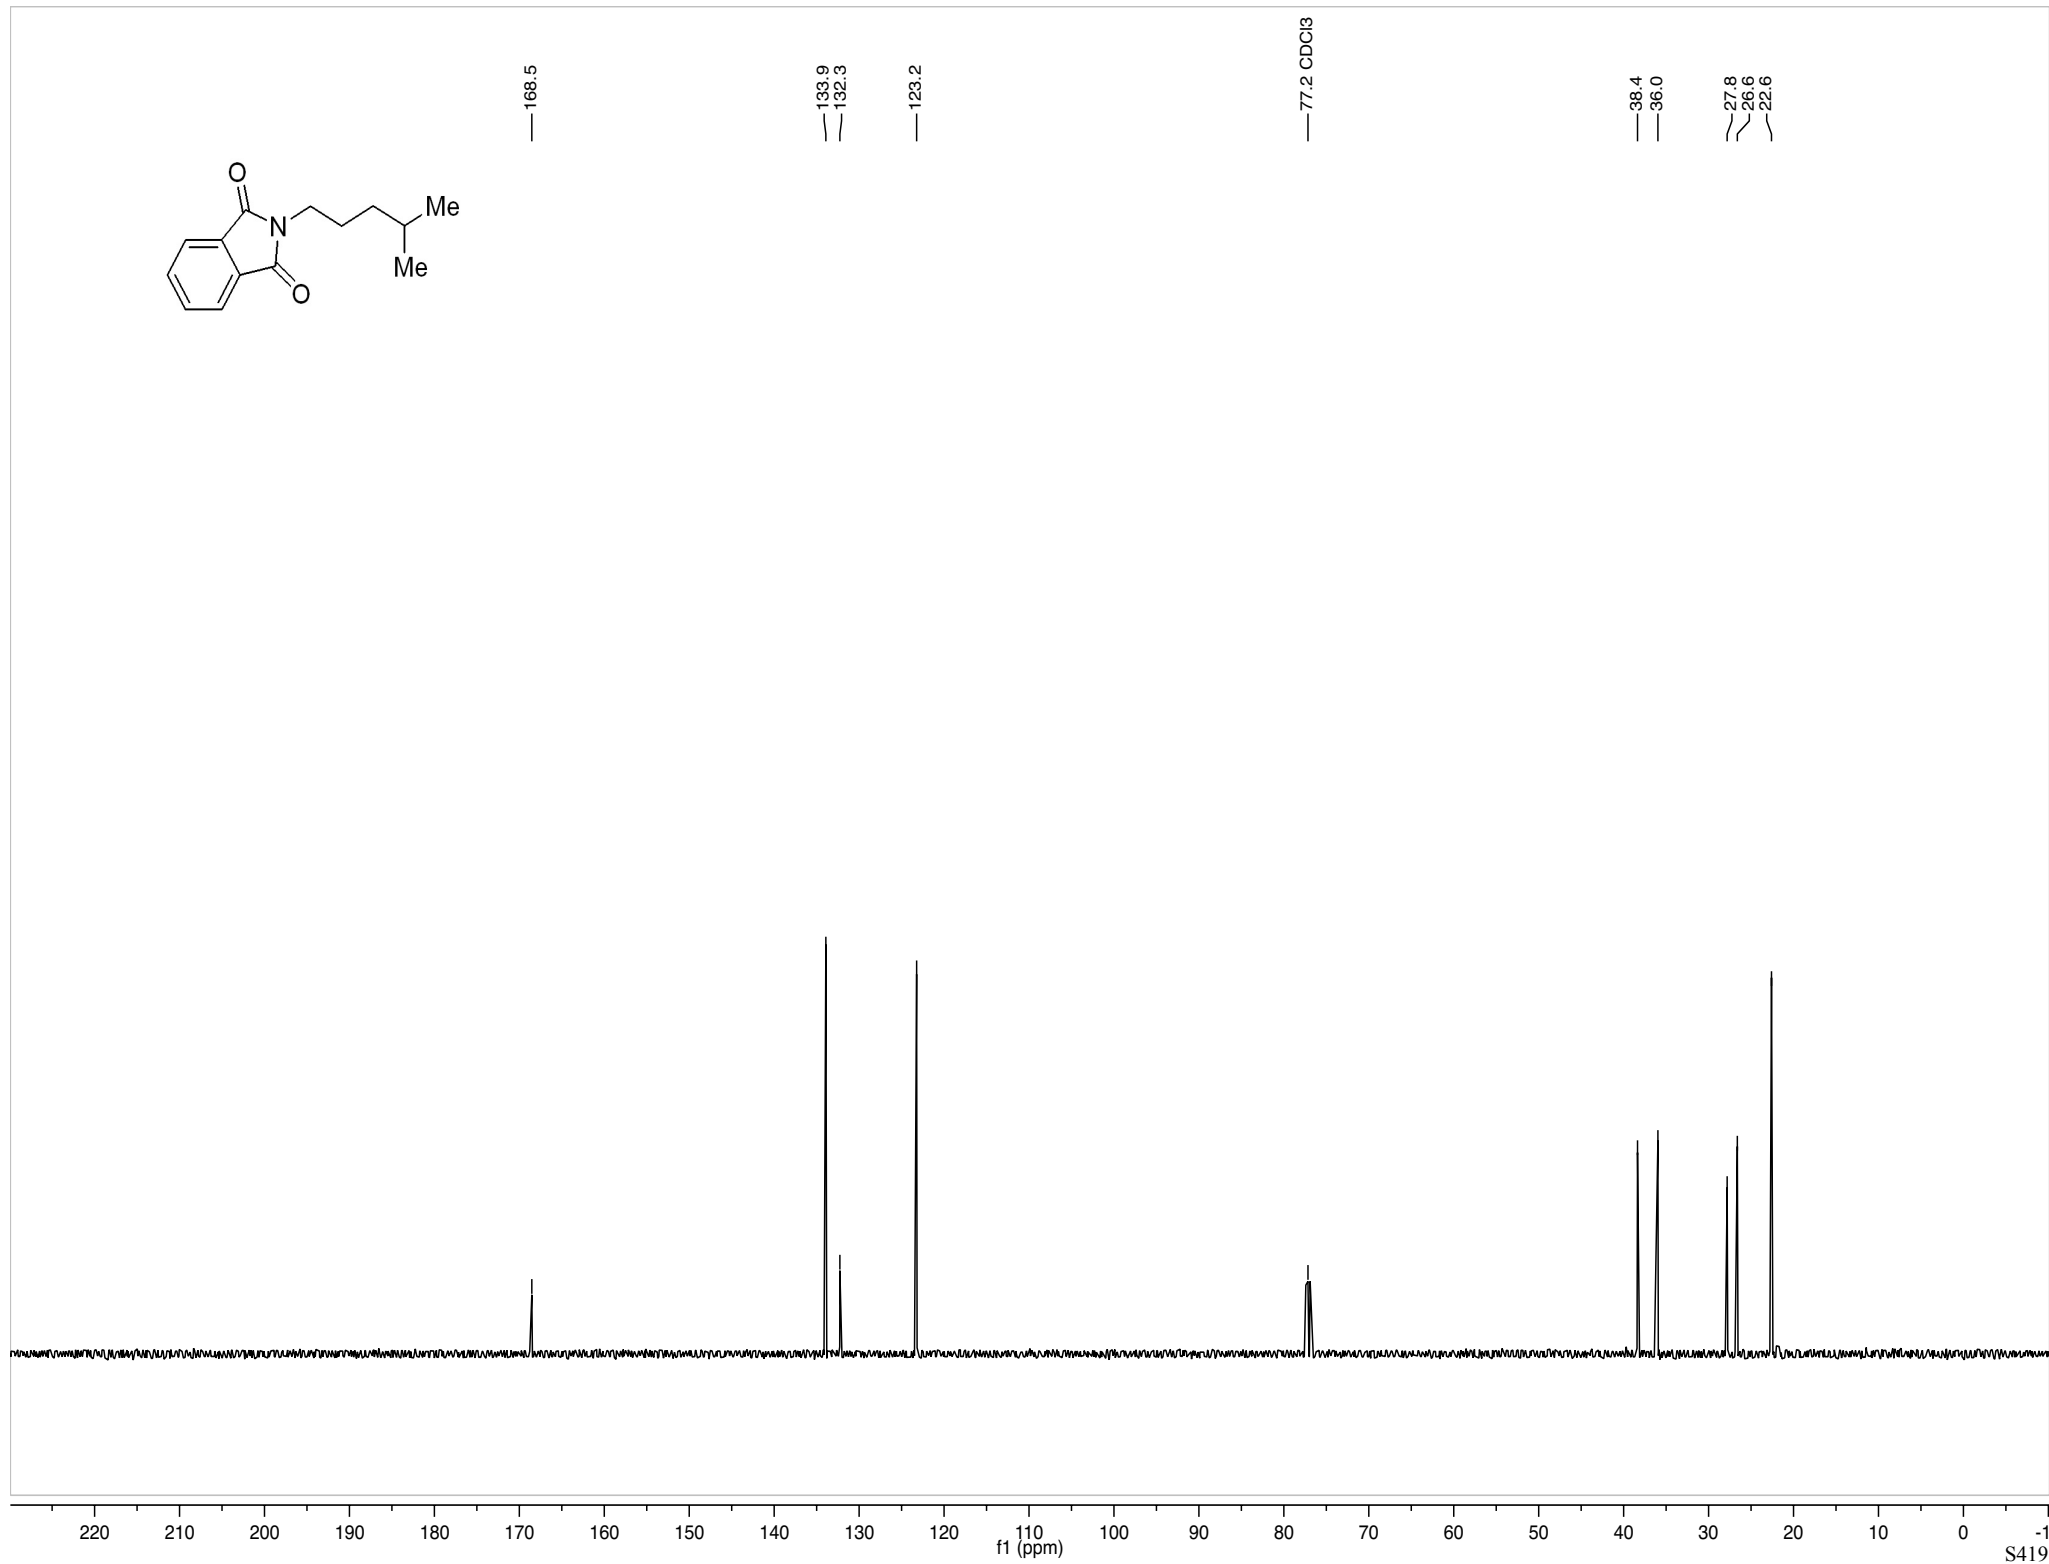

| Parameter                 | Value          |
|---------------------------|----------------|
| 1 Origin                  | Varian         |
| 2 Spectrometer            | inova          |
| 3 Solvent                 | CDCl3          |
| 4 Temperature             | 20.0           |
| 5 Pulse Sequence          | s2pul          |
| 6 Experiment              | 1D             |
| 7 Probe                   | QUAD           |
| 8 Number of Scans         | 8              |
| 9 Receiver Gain           | 36             |
| 10 Relaxation Delay       | 0.0000         |
| 11 Pulse Width            | 0.0000         |
| 12 Acquisition Time       | 4.6645         |
| 13 Spectrometer Frequency | 499.69         |
| 14 Spectral Width         | 7024.9         |
| 15 Lowest Frequency       | -1021.4        |
| 16 Nucleus                | <sup>1</sup> H |
| 17 Acquired Size          | 32768          |
| 18 Spectral Size          | 65536          |

— 7.26 CDCl<sub>3</sub>

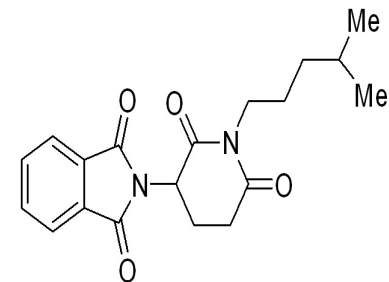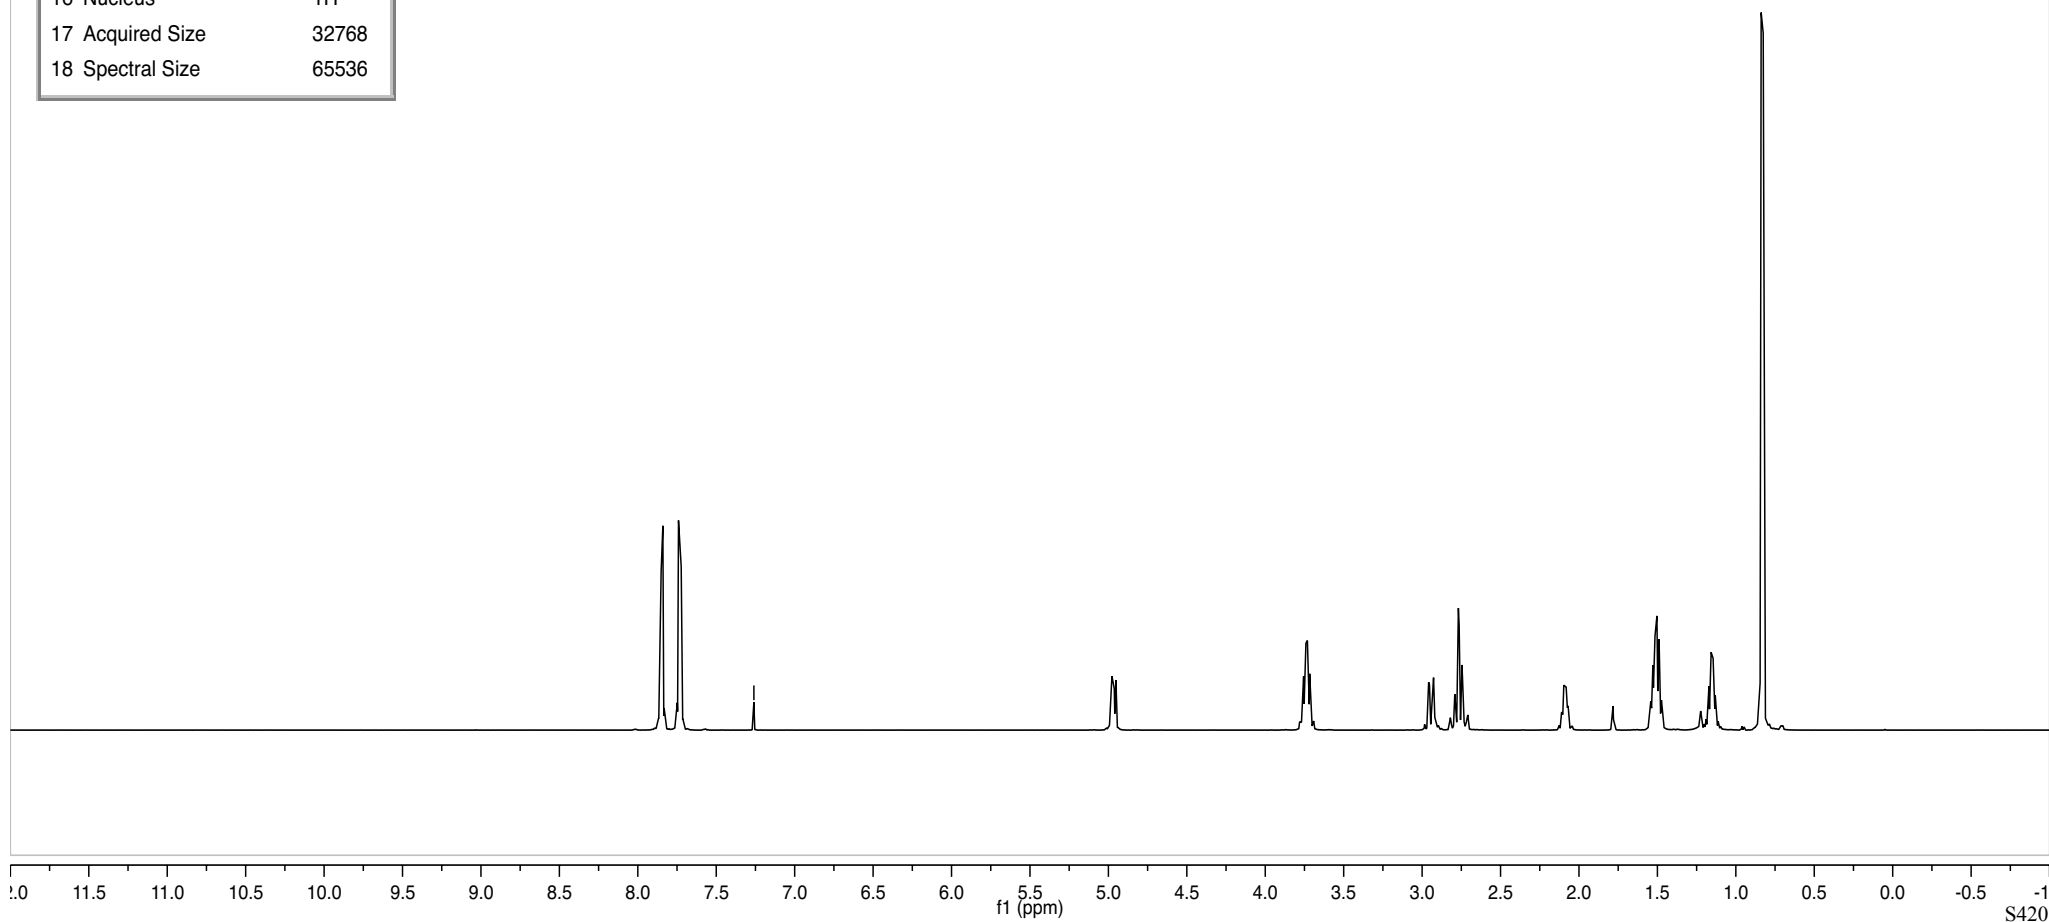

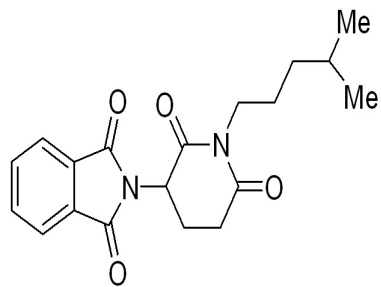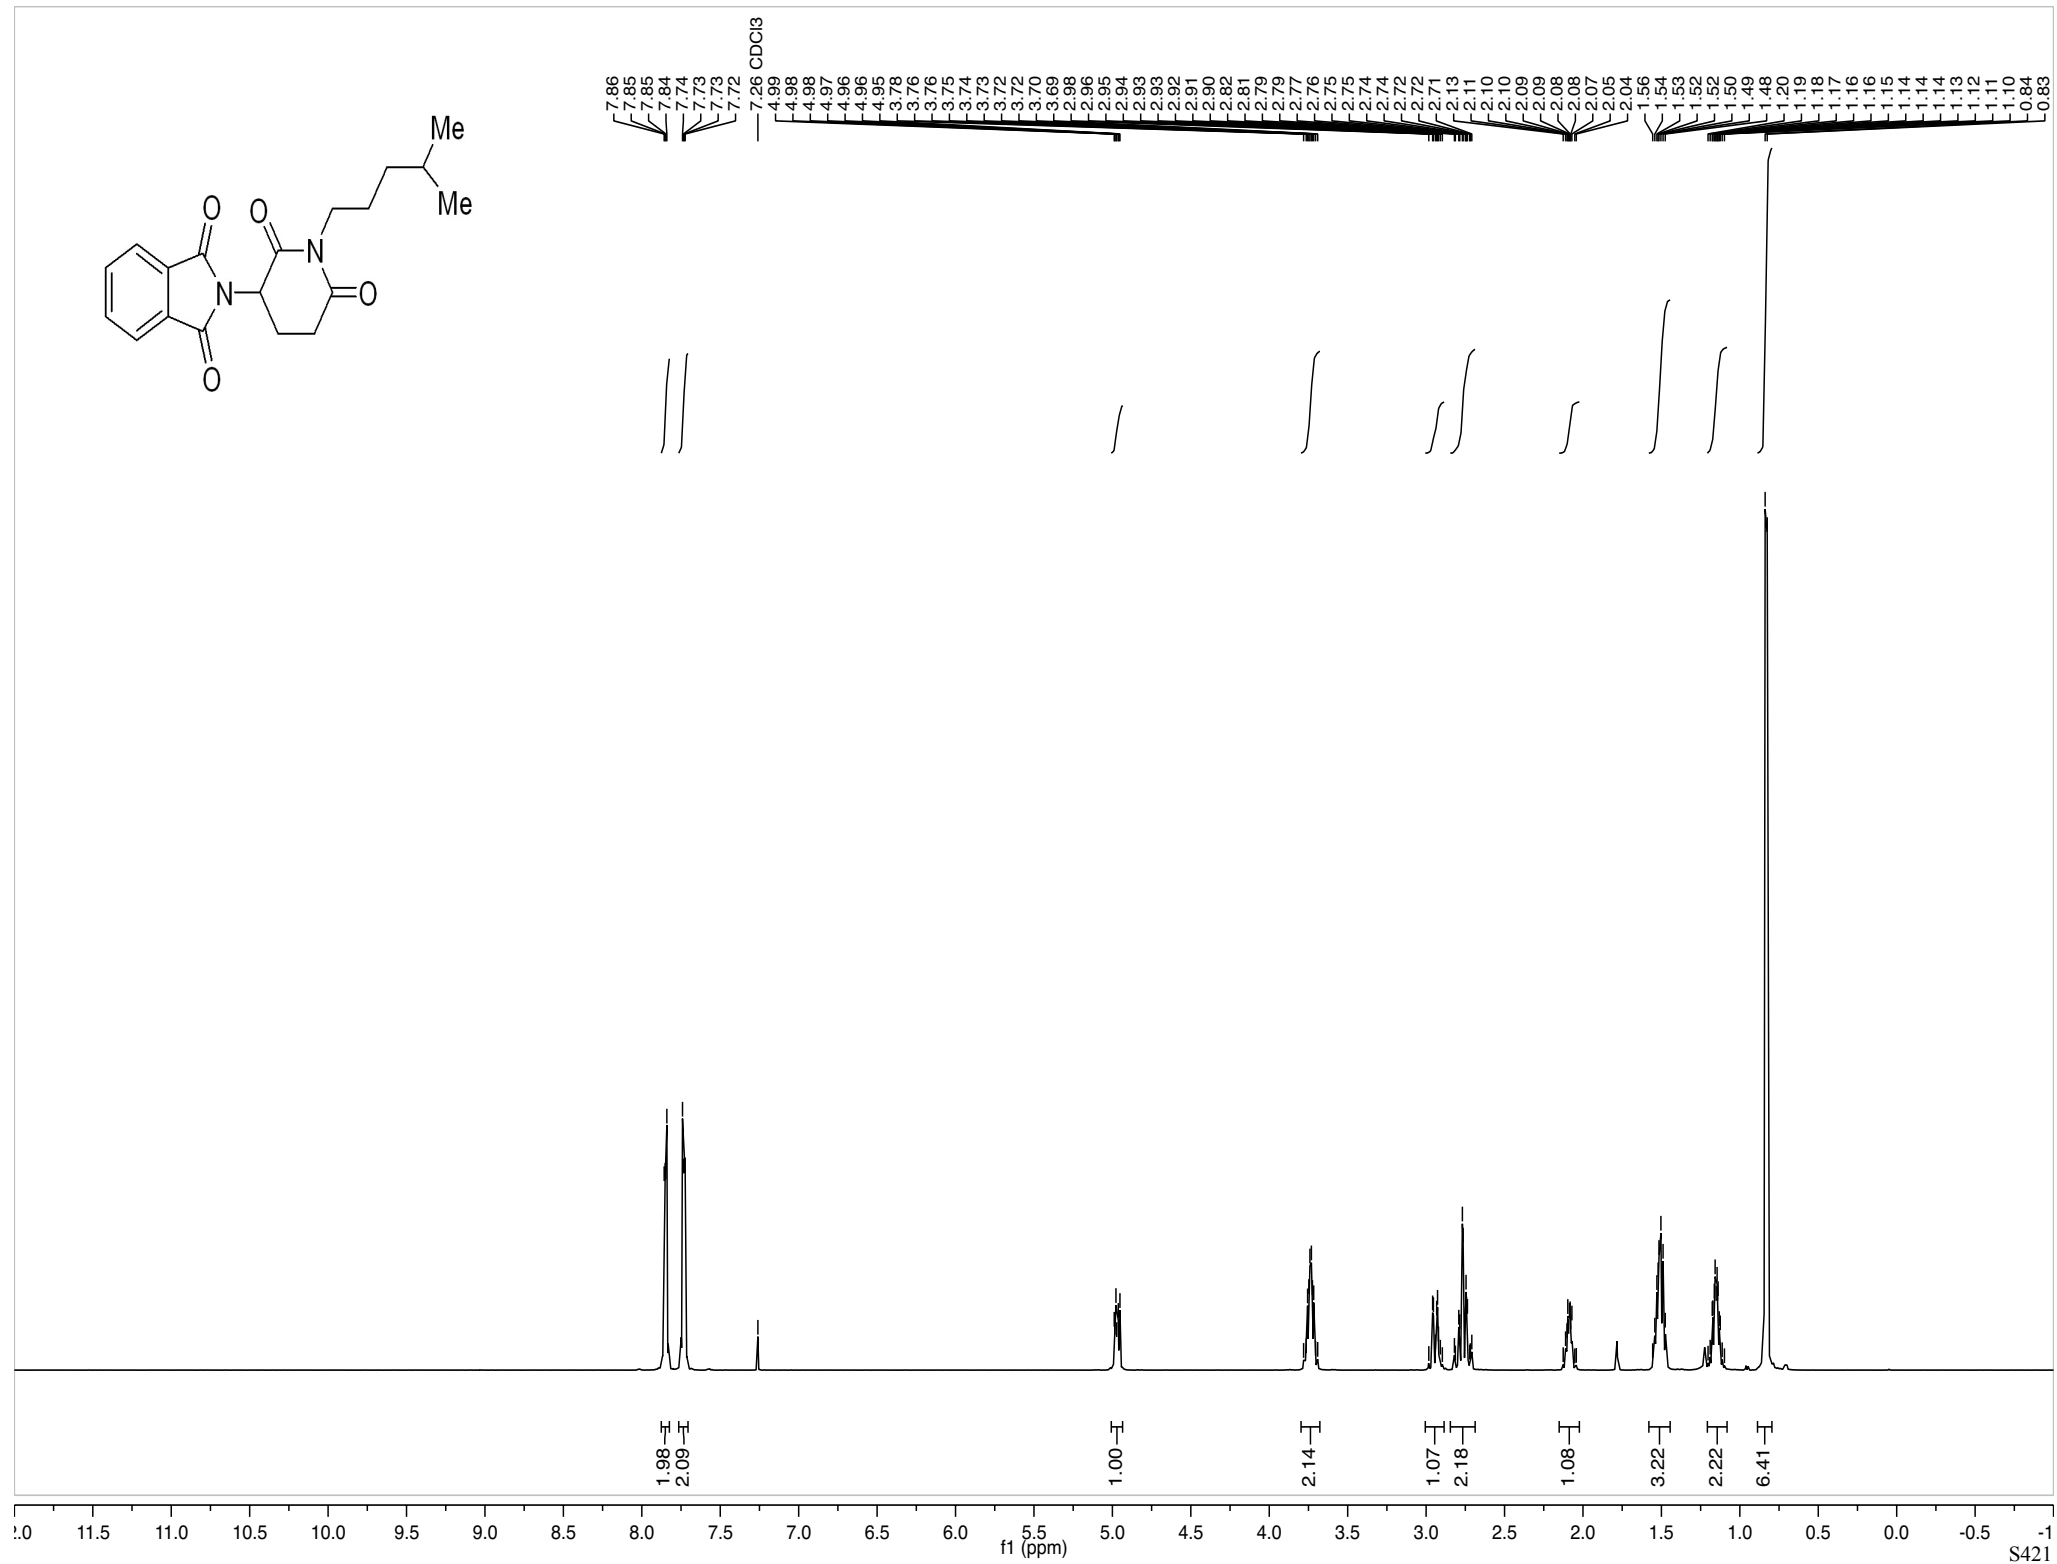

| Parameter                 | Value           |
|---------------------------|-----------------|
| 1 Origin                  | Varian          |
| 2 Spectrometer            | inova           |
| 3 Solvent                 | CDCl3           |
| 4 Temperature             | 20.0            |
| 5 Pulse Sequence          | s2pul           |
| 6 Experiment              | 1D              |
| 7 Probe                   | QUAD            |
| 8 Number of Scans         | 96              |
| 9 Receiver Gain           | 60              |
| 10 Relaxation Delay       | 1.0000          |
| 11 Pulse Width            | 0.0000          |
| 12 Acquisition Time       | 1.0863          |
| 13 Spectrometer Frequency | 125.66          |
| 14 Spectral Width         | 30165.9         |
| 15 Lowest Frequency       | -1281.2         |
| 16 Nucleus                | <sup>13</sup> C |
| 17 Acquired Size          | 32768           |
| 18 Spectral Size          | 65536           |

— 77.2 CDCl<sub>3</sub>

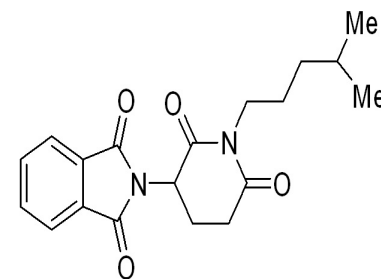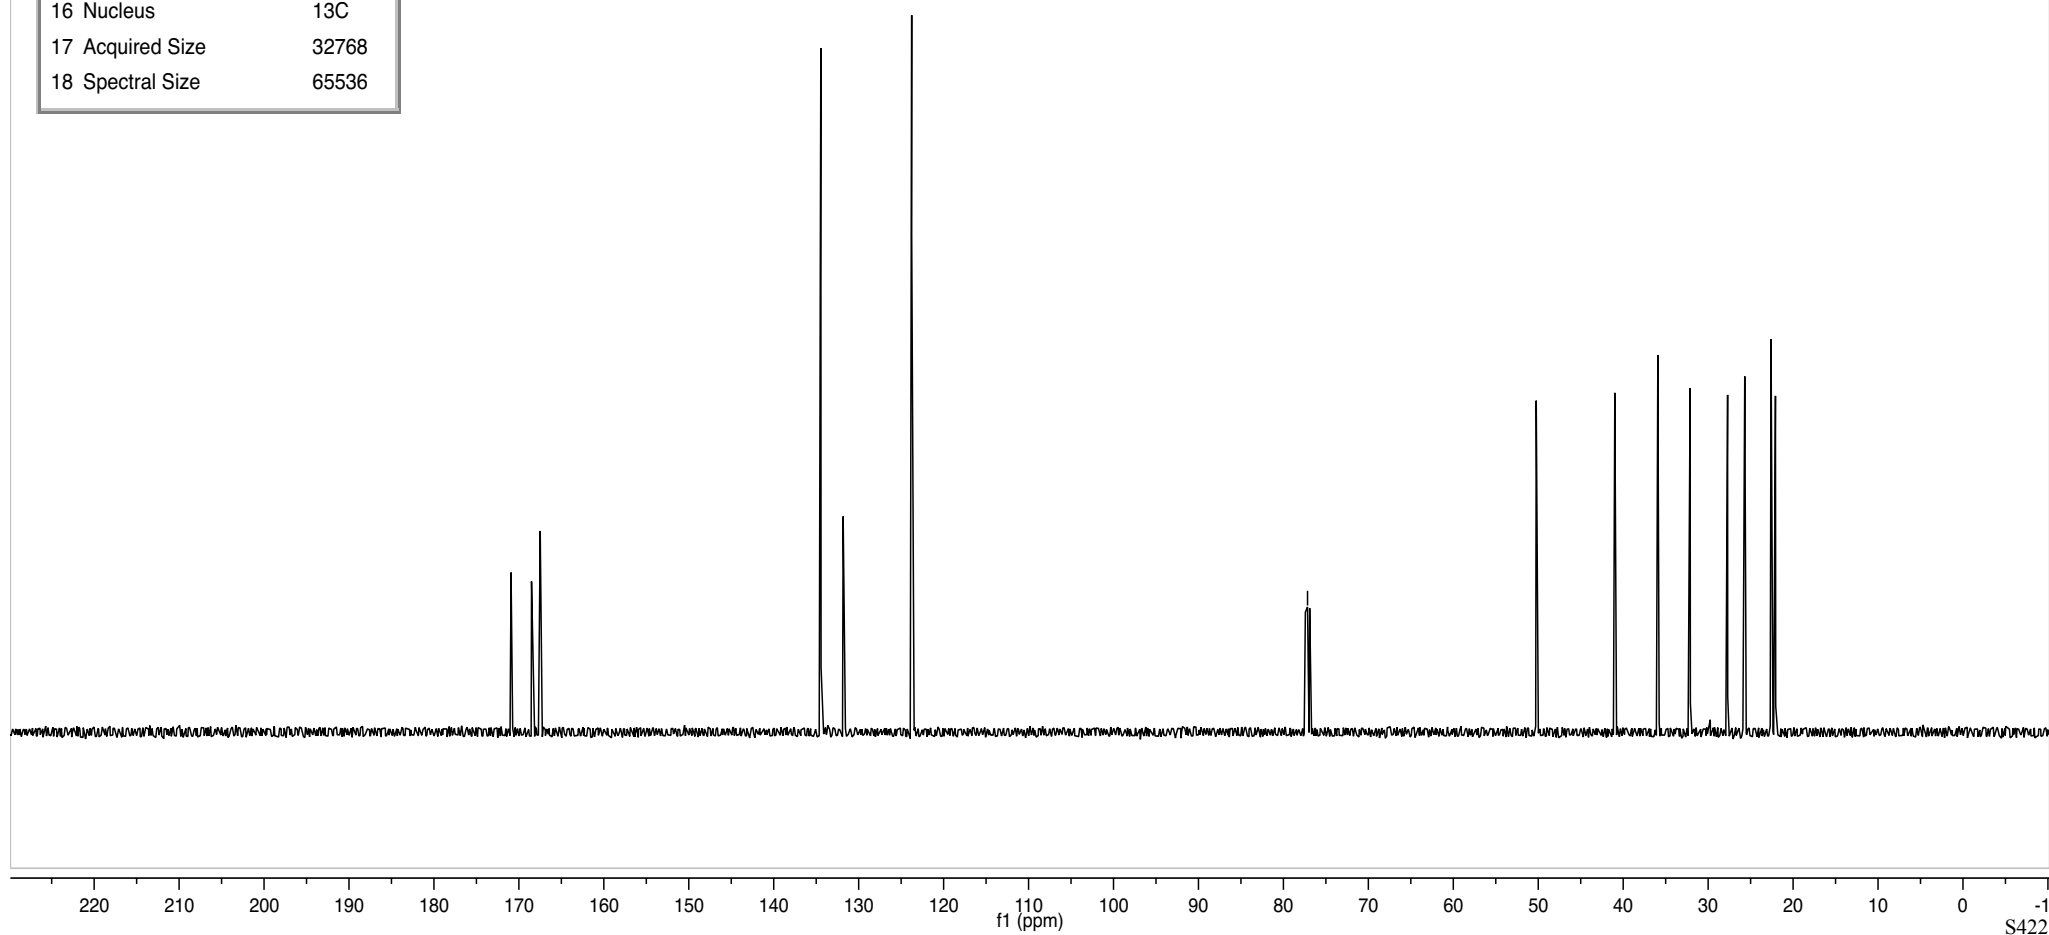

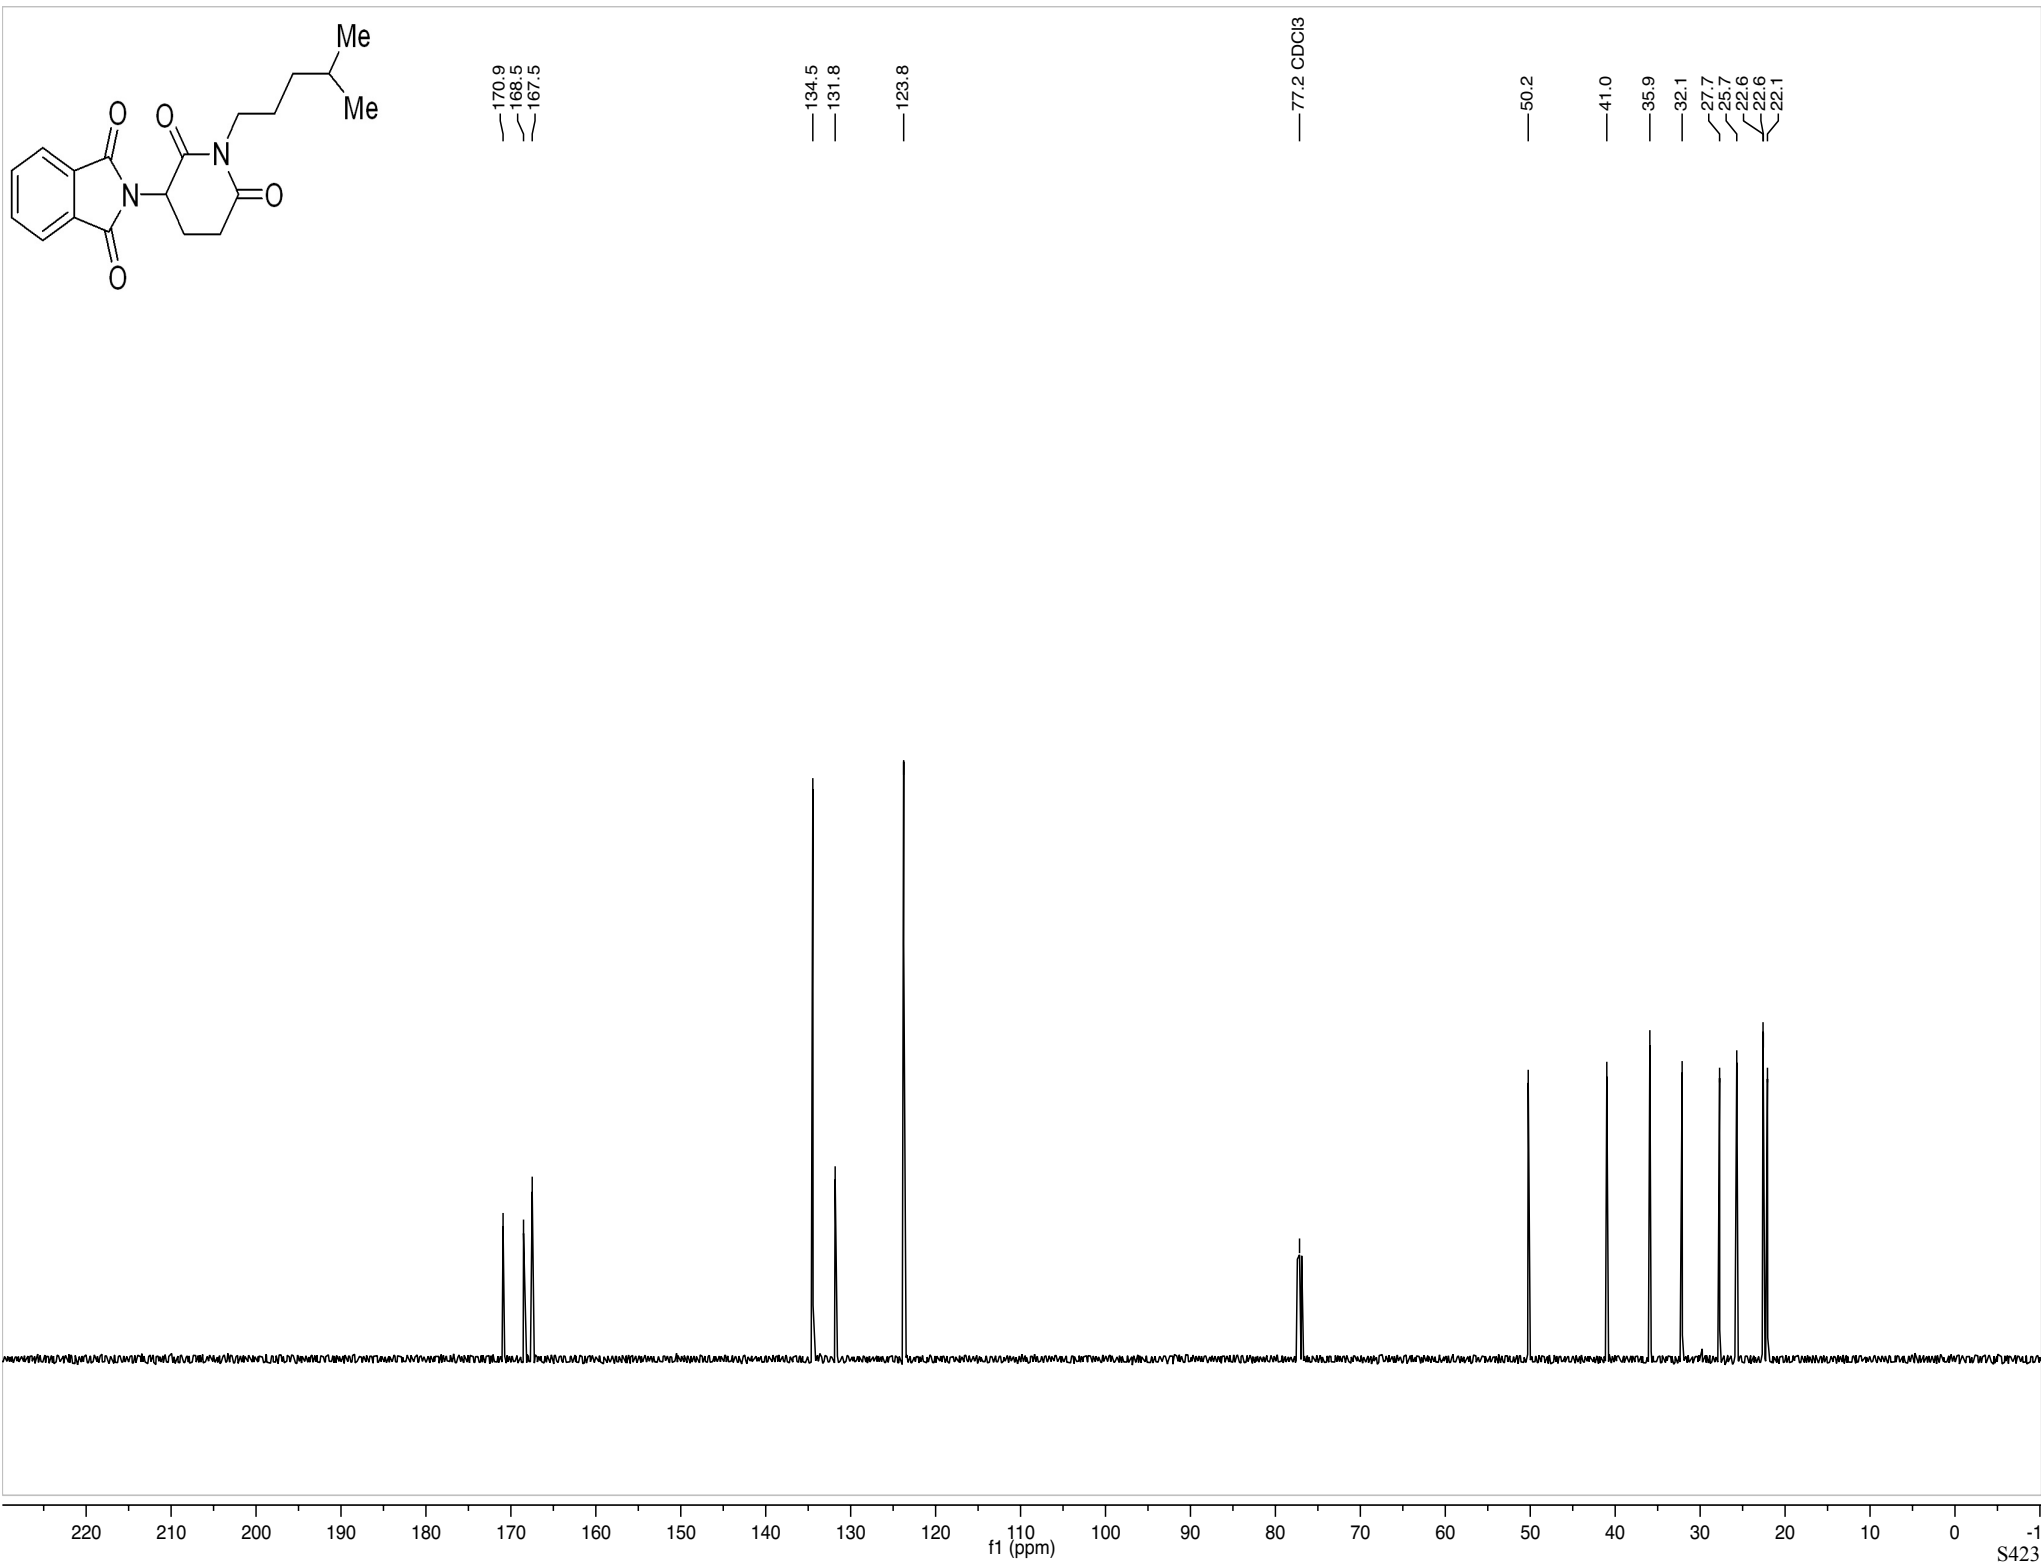



|    | Parameter              | Value        |
|----|------------------------|--------------|
| 1  | Origin                 | Varian       |
| 2  | Spectrometer           | inova        |
| 3  | Solvent                | DMSO         |
| 4  | Temperature            | 20.0         |
| 5  | Pulse Sequence         | s2pul        |
| 6  | Experiment             | 1D           |
| 7  | Probe                  | QUAD         |
| 8  | Number of Scans        | 8            |
| 9  | Receiver Gain          | 36           |
| 10 | Relaxation Delay       | 0.0000       |
| 11 | Pulse Width            | 0.0000       |
| 12 | Acquisition Time       | 4.6645       |
| 13 | Spectrometer Frequency | 499.70       |
| 14 | Spectral Width         | 7024.9       |
| 15 | Lowest Frequency       | -1011.9      |
| 16 | Nucleus                | $^1\text{H}$ |
| 17 | Acquired Size          | 32768        |
| 18 | Spectral Size          | 65536        |

— 2.50 DMSO-d6

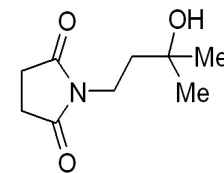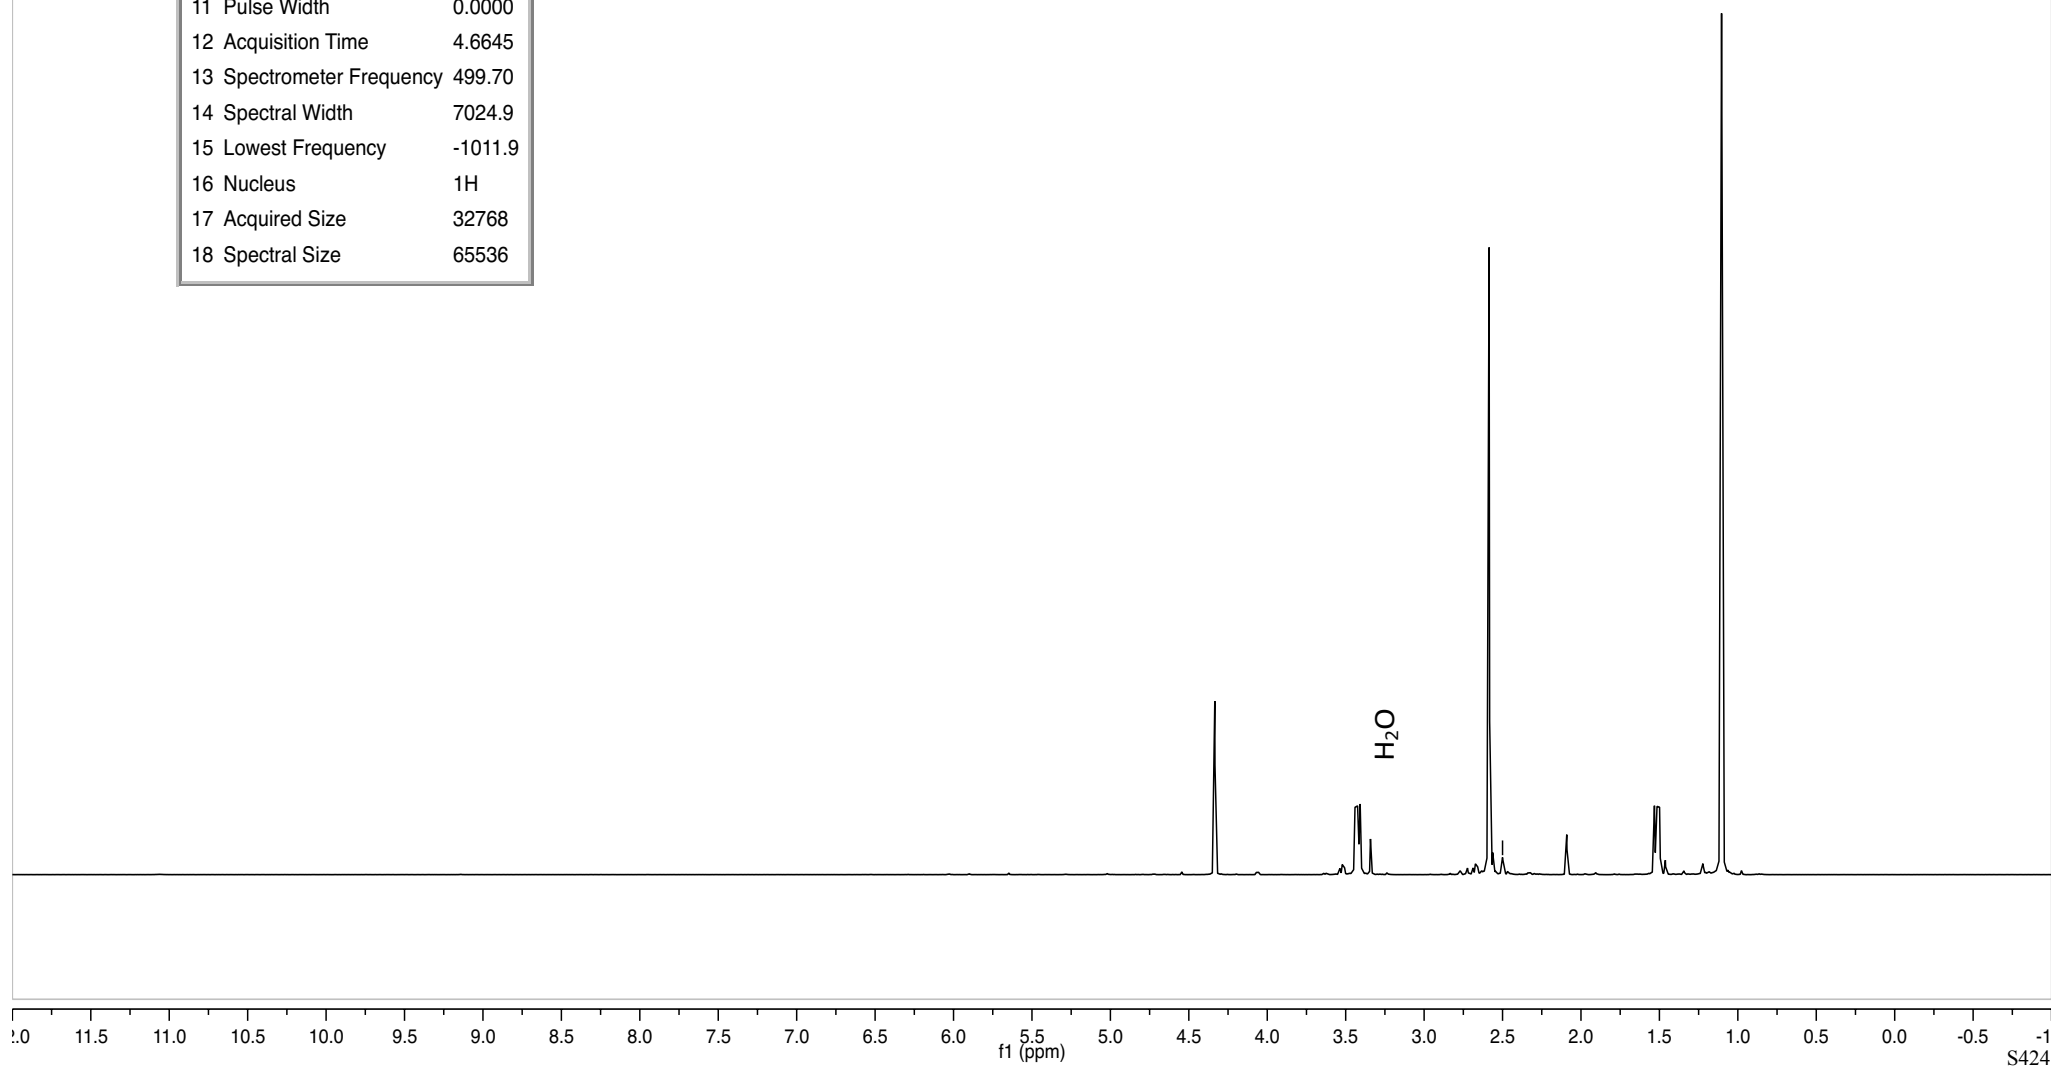

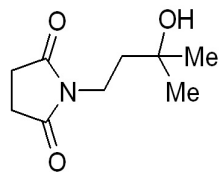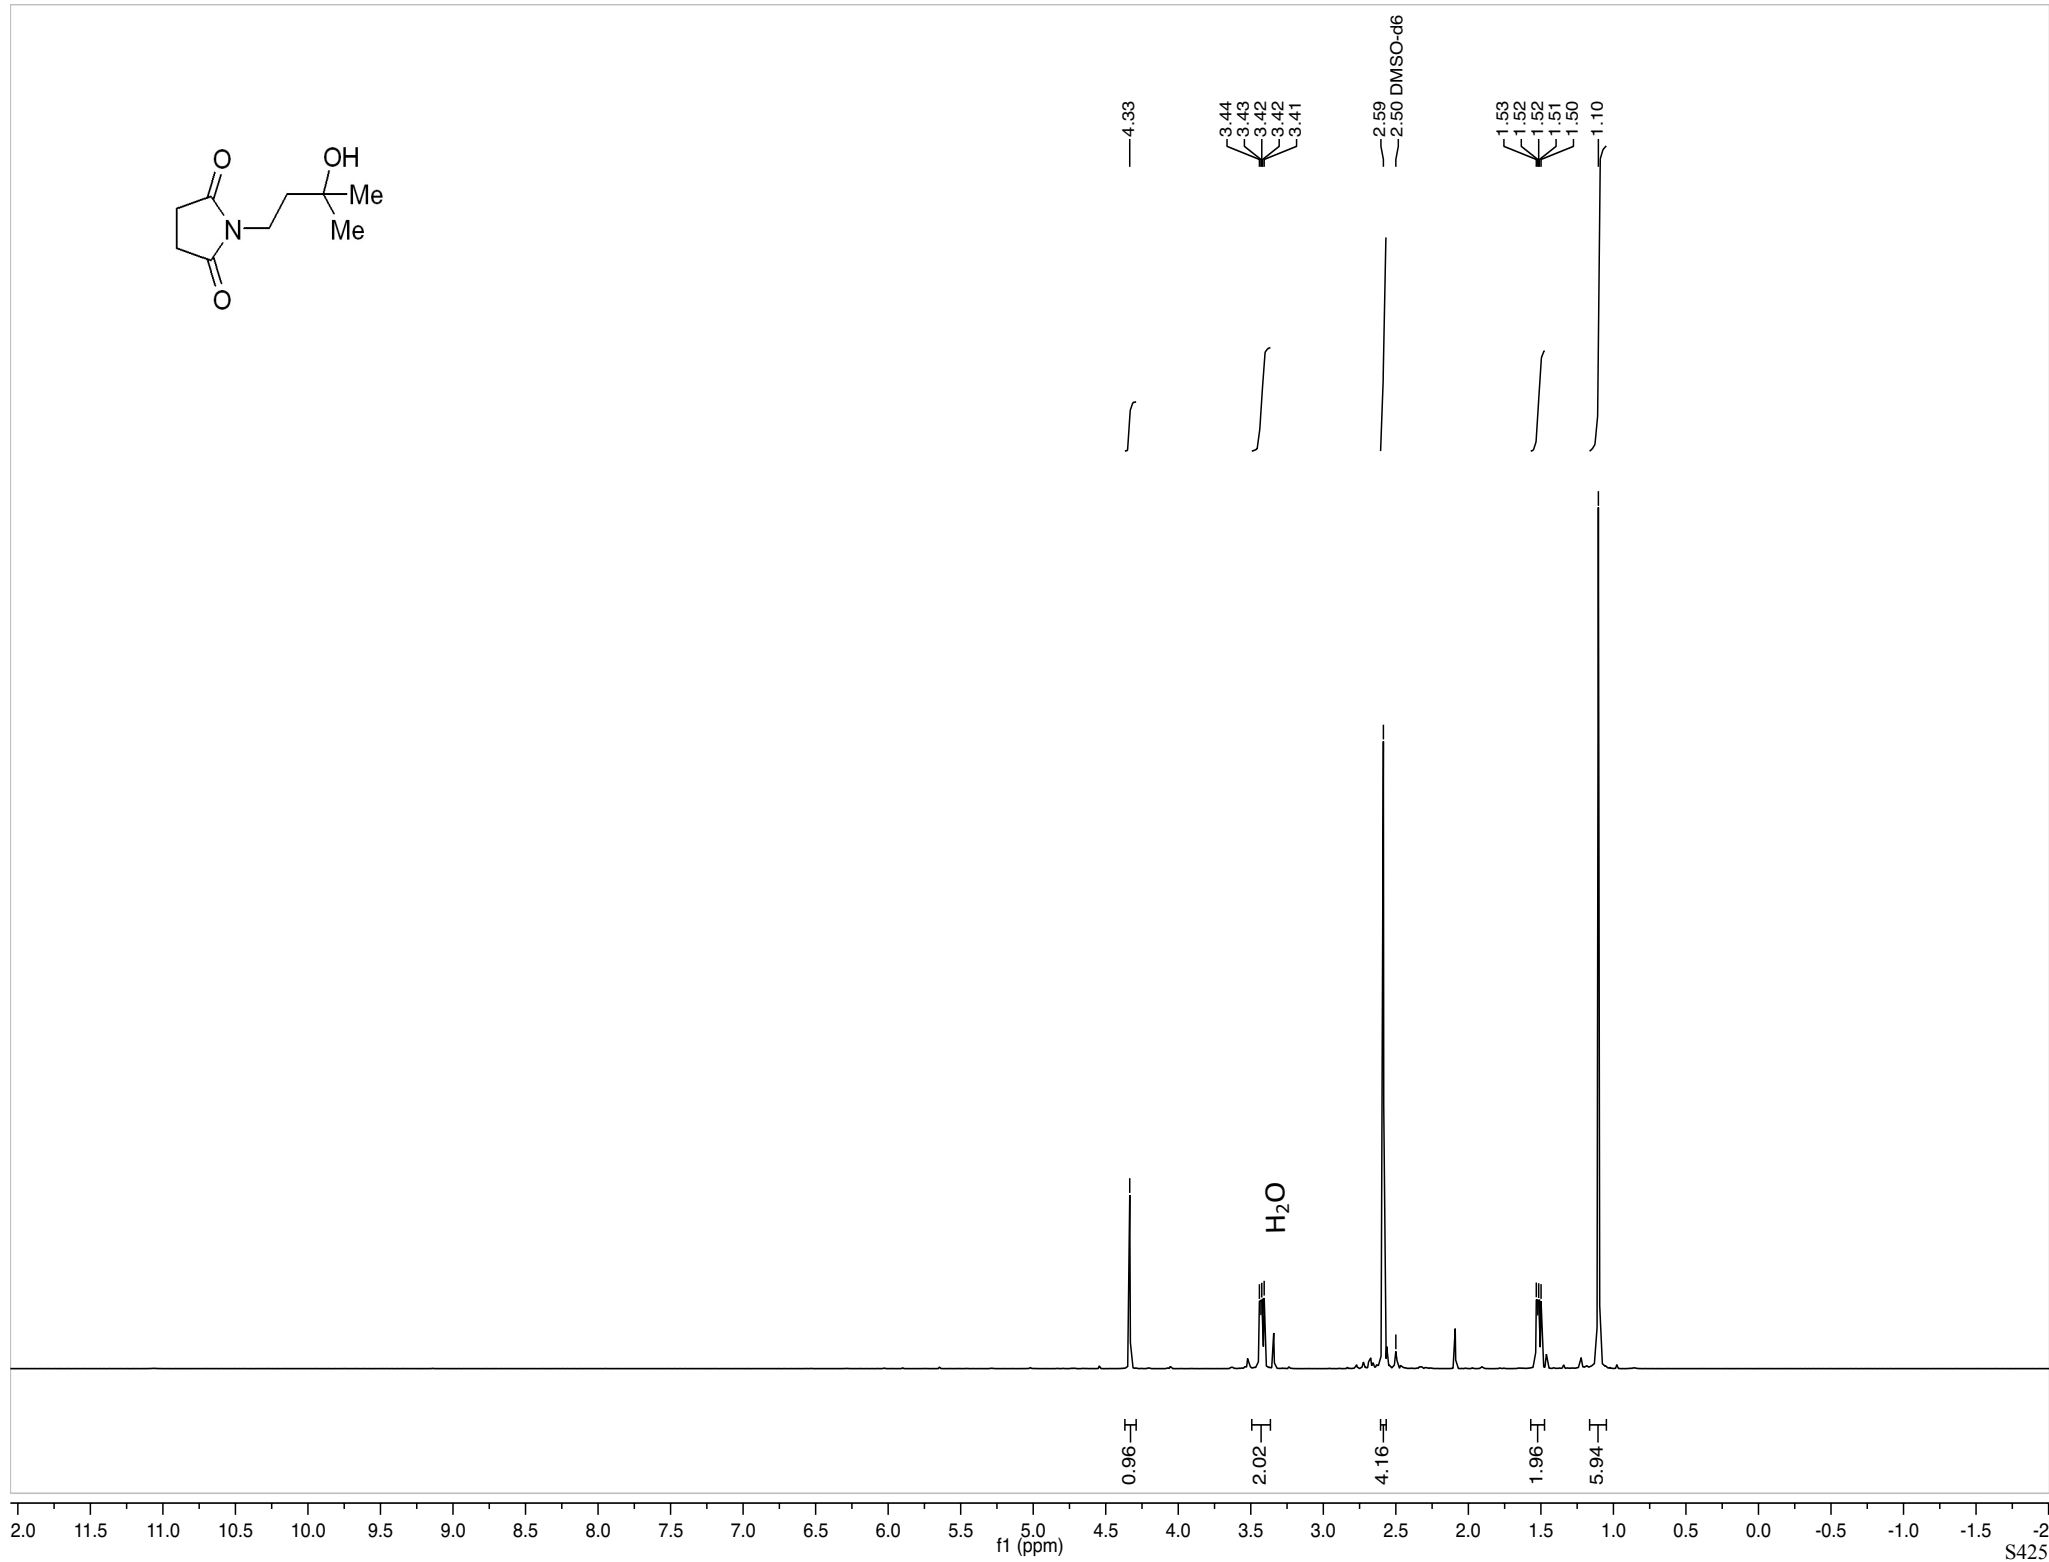

|    | Parameter              | Value           |
|----|------------------------|-----------------|
| 1  | Origin                 | Varian          |
| 2  | Spectrometer           | inova           |
| 3  | Solvent                | DMSO            |
| 4  | Temperature            | 20.0            |
| 5  | Pulse Sequence         | s2pul           |
| 6  | Experiment             | 1D              |
| 7  | Probe                  | QUAD            |
| 8  | Number of Scans        | 64              |
| 9  | Receiver Gain          | 60              |
| 10 | Relaxation Delay       | 1.0000          |
| 11 | Pulse Width            | 0.0000          |
| 12 | Acquisition Time       | 1.0863          |
| 13 | Spectrometer Frequency | 125.66          |
| 14 | Spectral Width         | 30165.9         |
| 15 | Lowest Frequency       | -1260.2         |
| 16 | Nucleus                | <sup>13</sup> C |
| 17 | Acquired Size          | 32768           |
| 18 | Spectral Size          | 65536           |

— 39.52 DMSO-d6

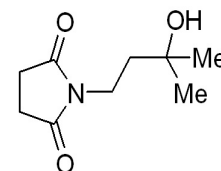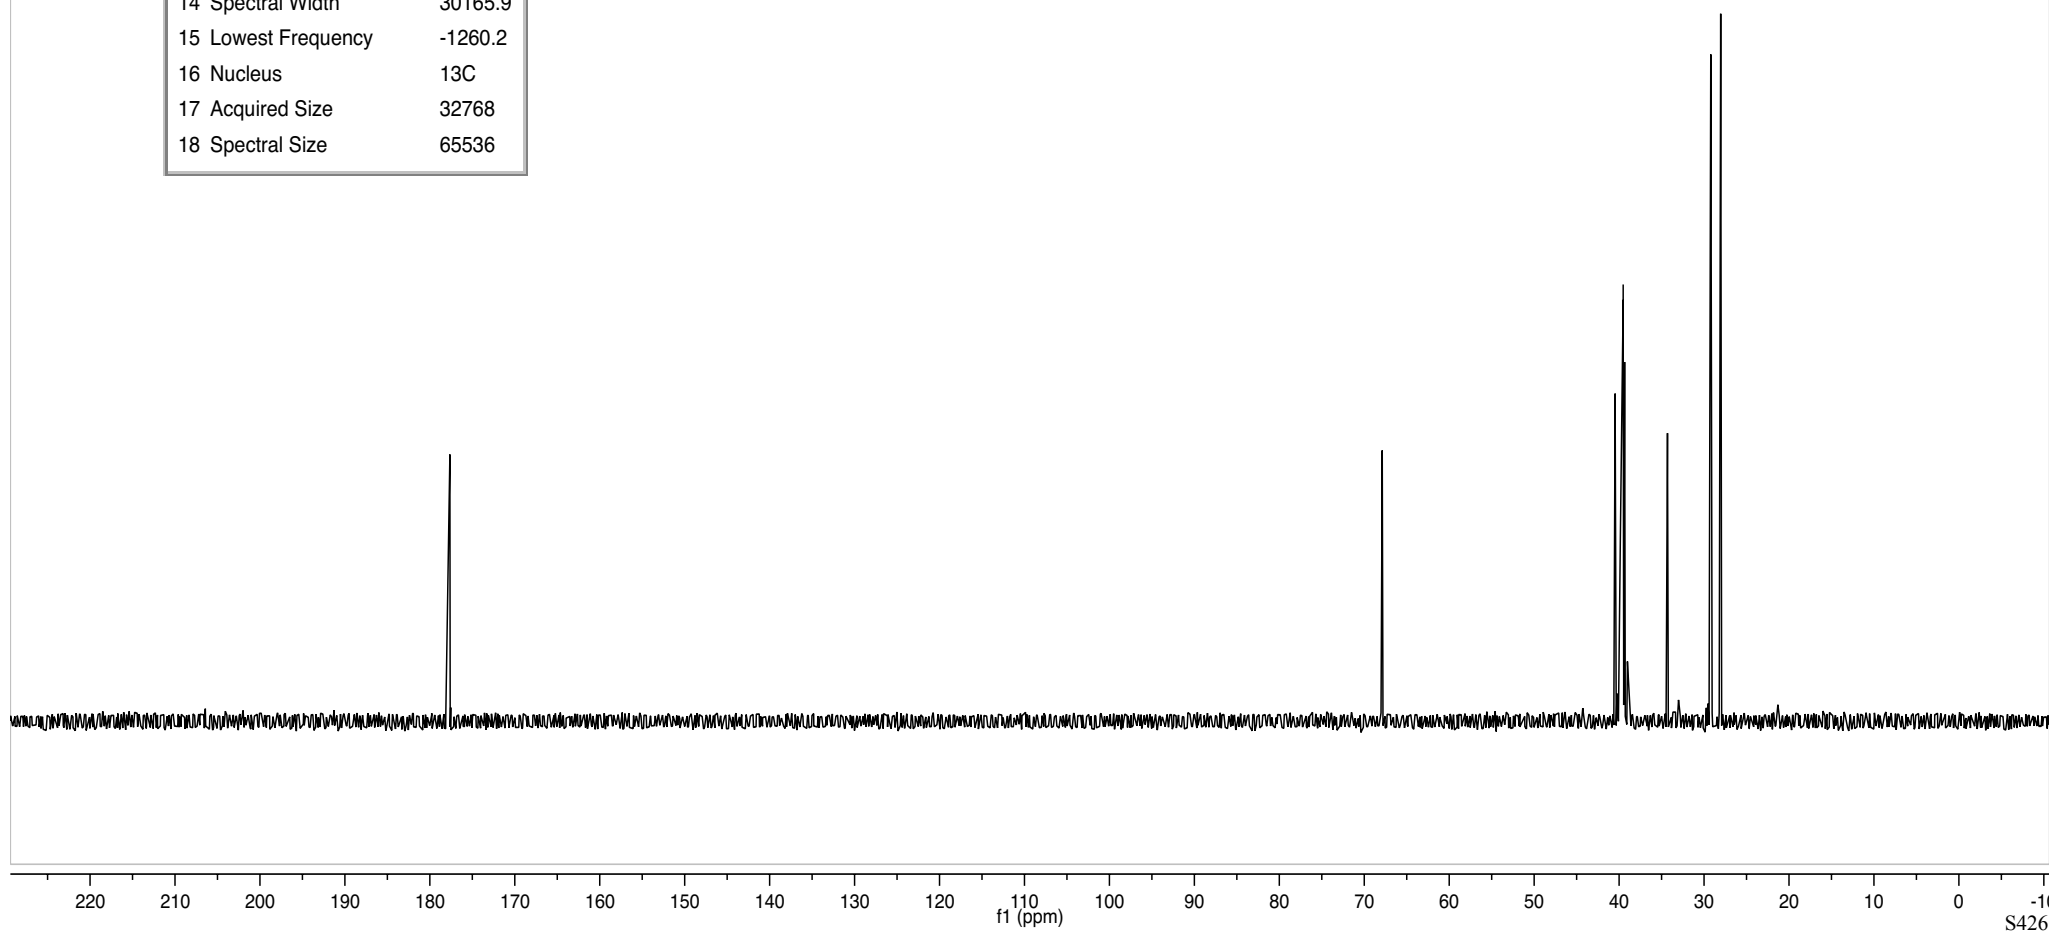

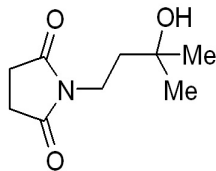

—177.64

—67.88

40.47  
39.52 DMSO-d6

—34.30

29.21  
28.04

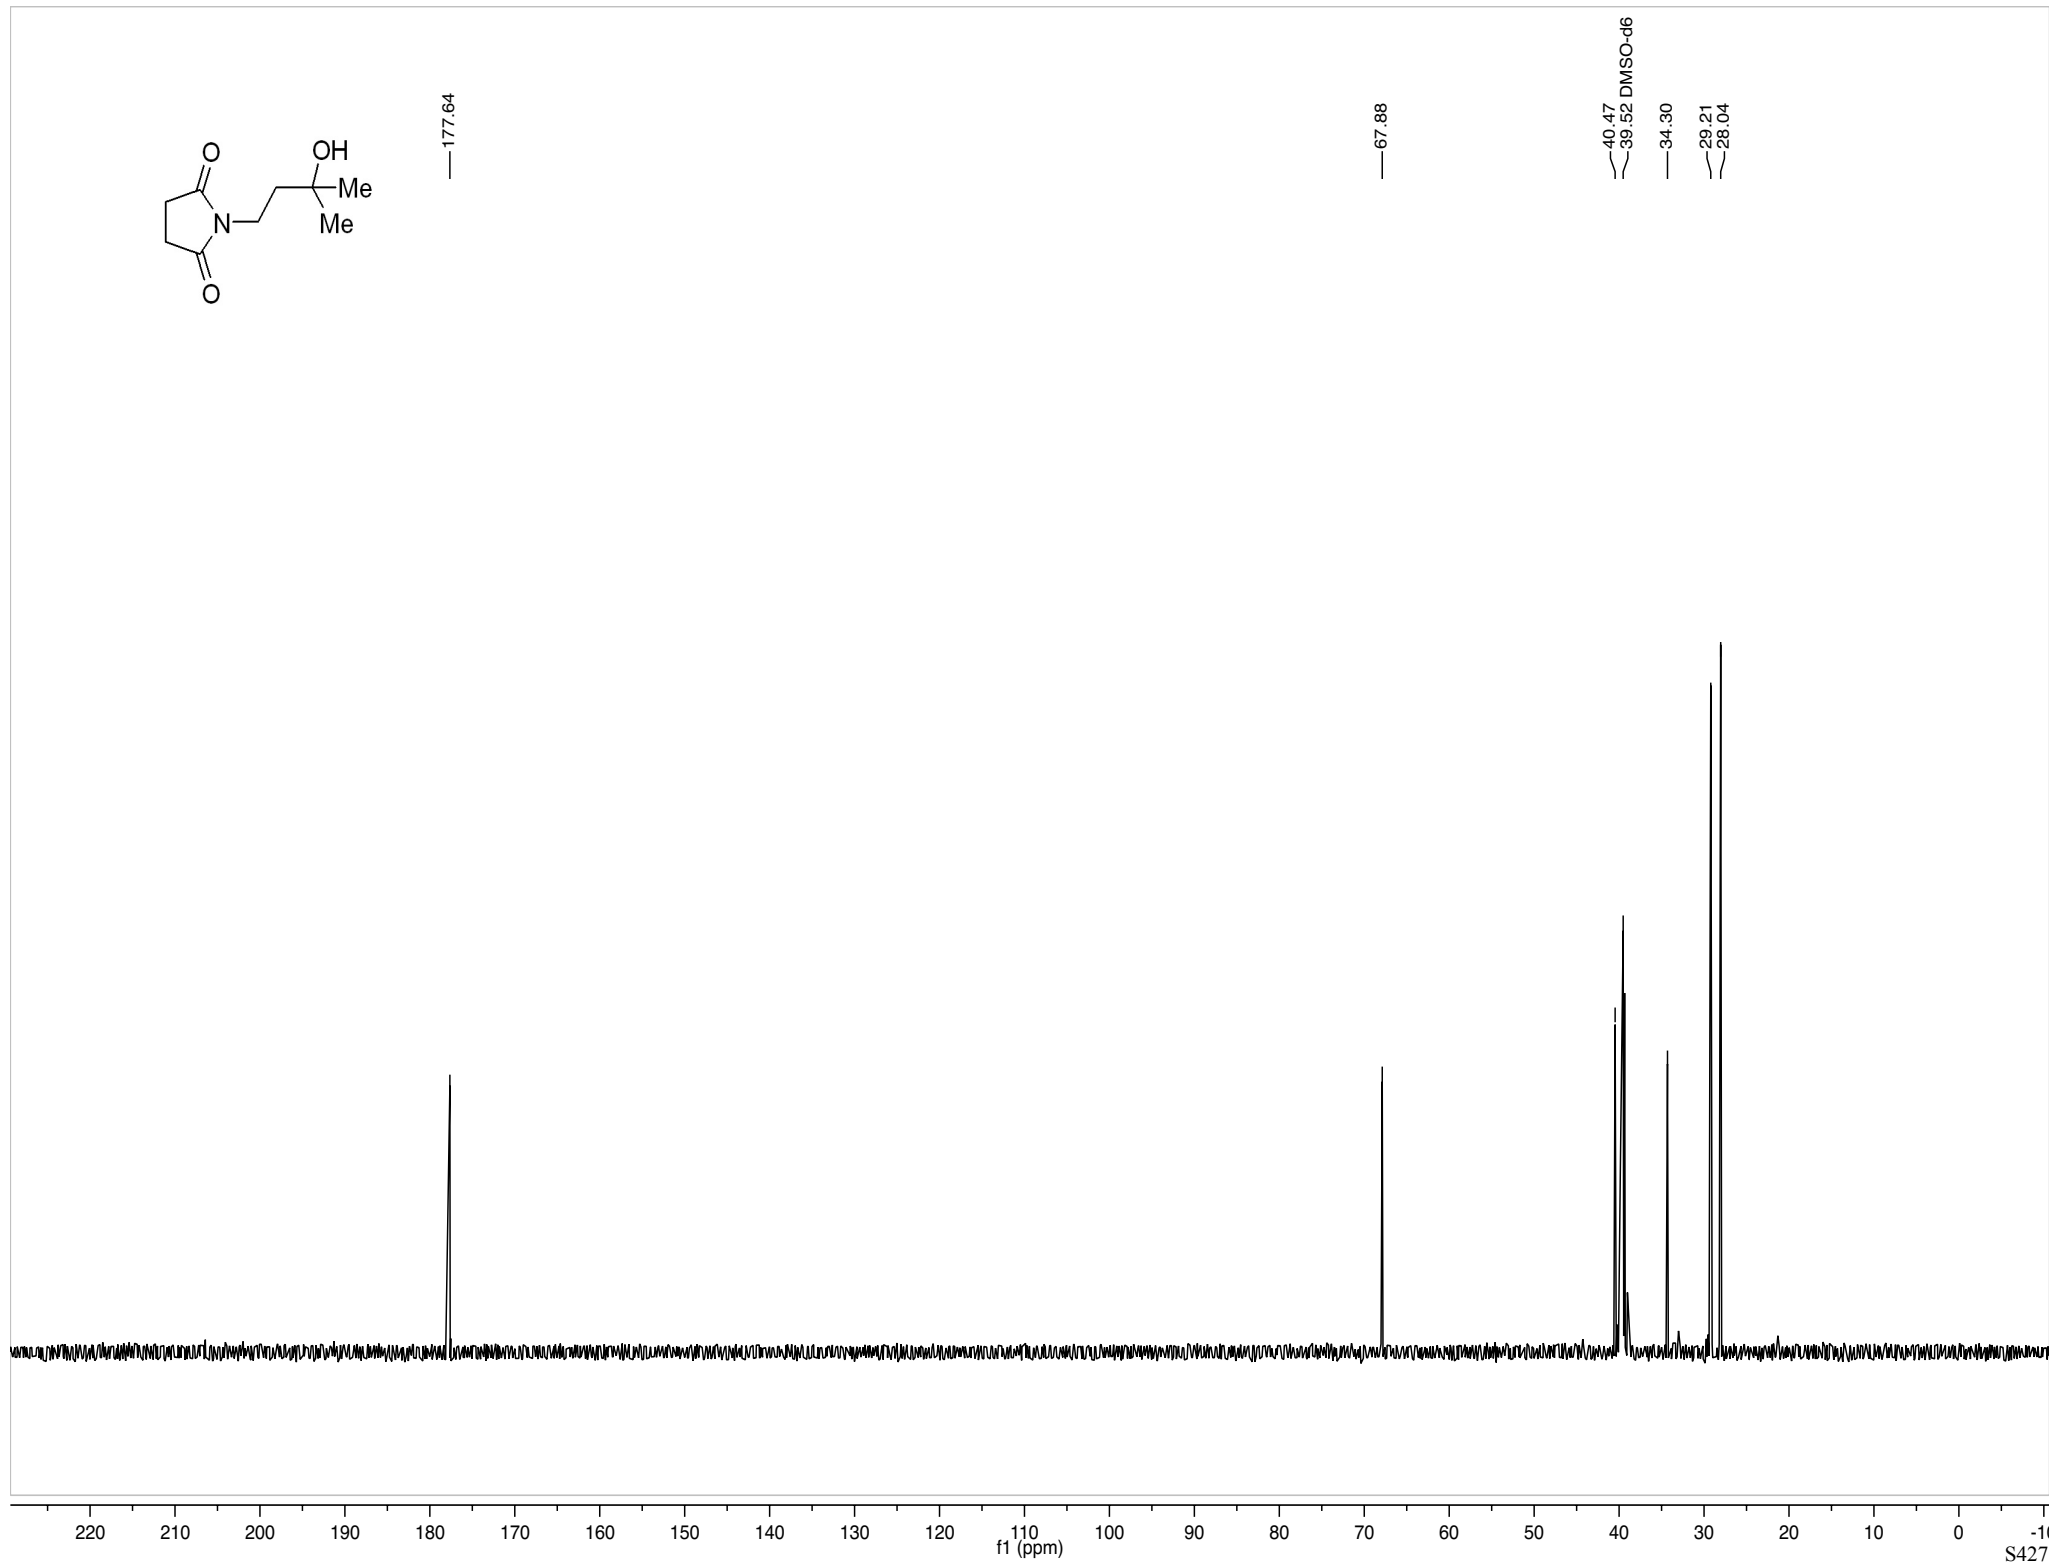

|    | Parameter              | Value          |
|----|------------------------|----------------|
| 1  | Origin                 | Varian         |
| 2  | Spectrometer           | inova          |
| 3  | Solvent                | DMSO           |
| 4  | Temperature            | 20.0           |
| 5  | Pulse Sequence         | s2pul          |
| 6  | Experiment             | 1D             |
| 7  | Probe                  | QUAD           |
| 8  | Number of Scans        | 8              |
| 9  | Receiver Gain          | 46             |
| 10 | Relaxation Delay       | 0.0000         |
| 11 | Pulse Width            | 0.0000         |
| 12 | Acquisition Time       | 4.6645         |
| 13 | Spectrometer Frequency | 499.70         |
| 14 | Spectral Width         | 7024.9         |
| 15 | Lowest Frequency       | -1002.9        |
| 16 | Nucleus                | <sup>1</sup> H |
| 17 | Acquired Size          | 32768          |
| 18 | Spectral Size          | 65536          |

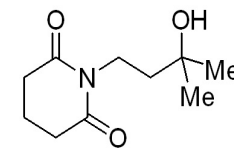

— 2.50 DMSO-d<sub>6</sub>

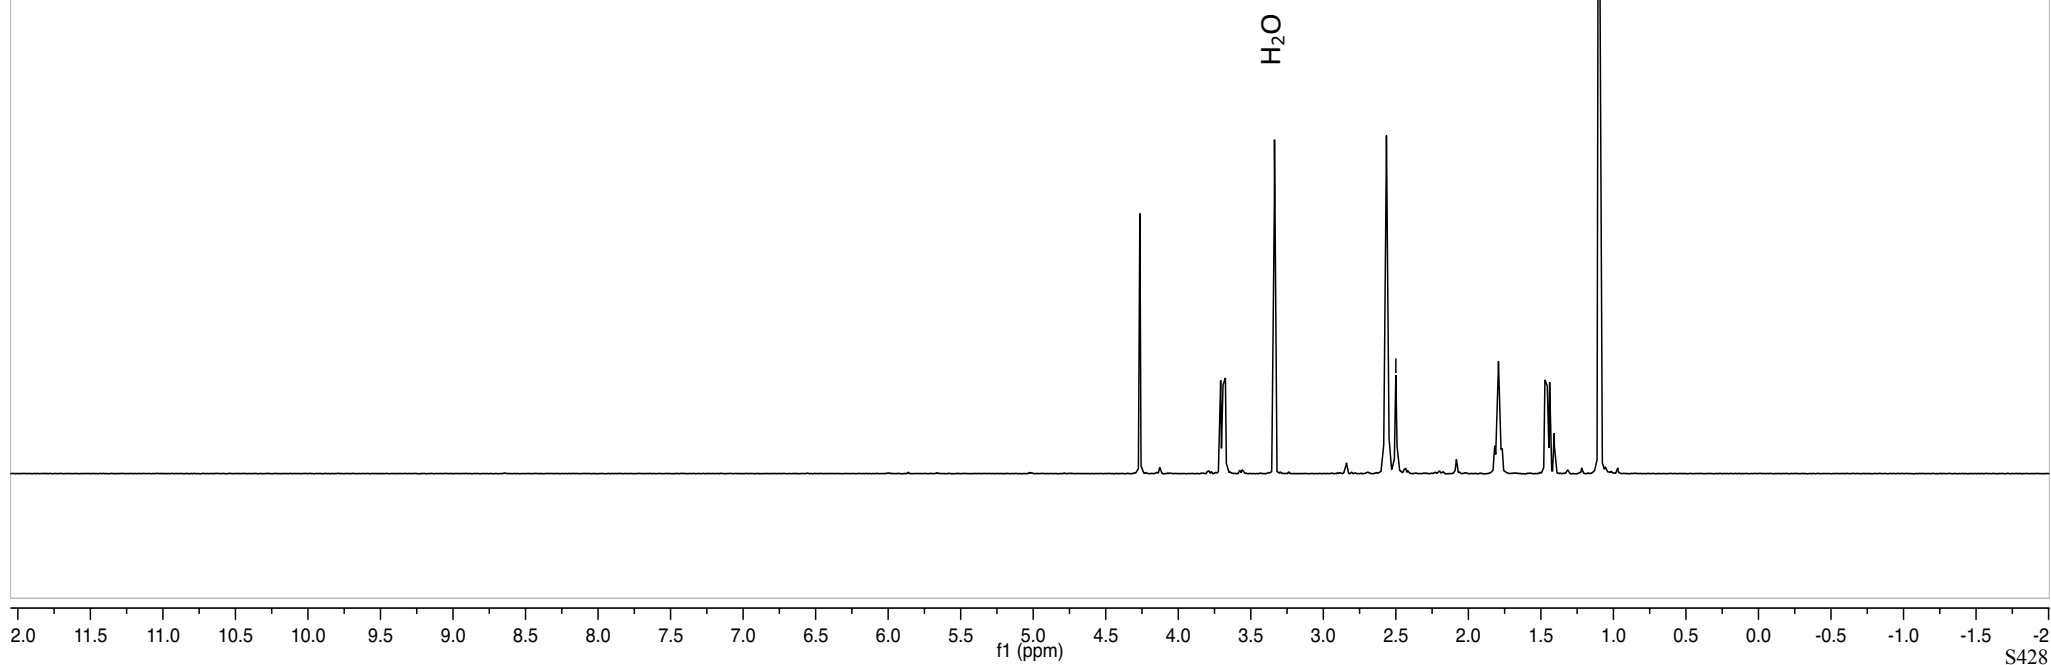

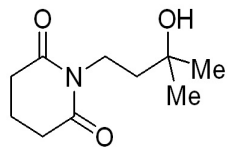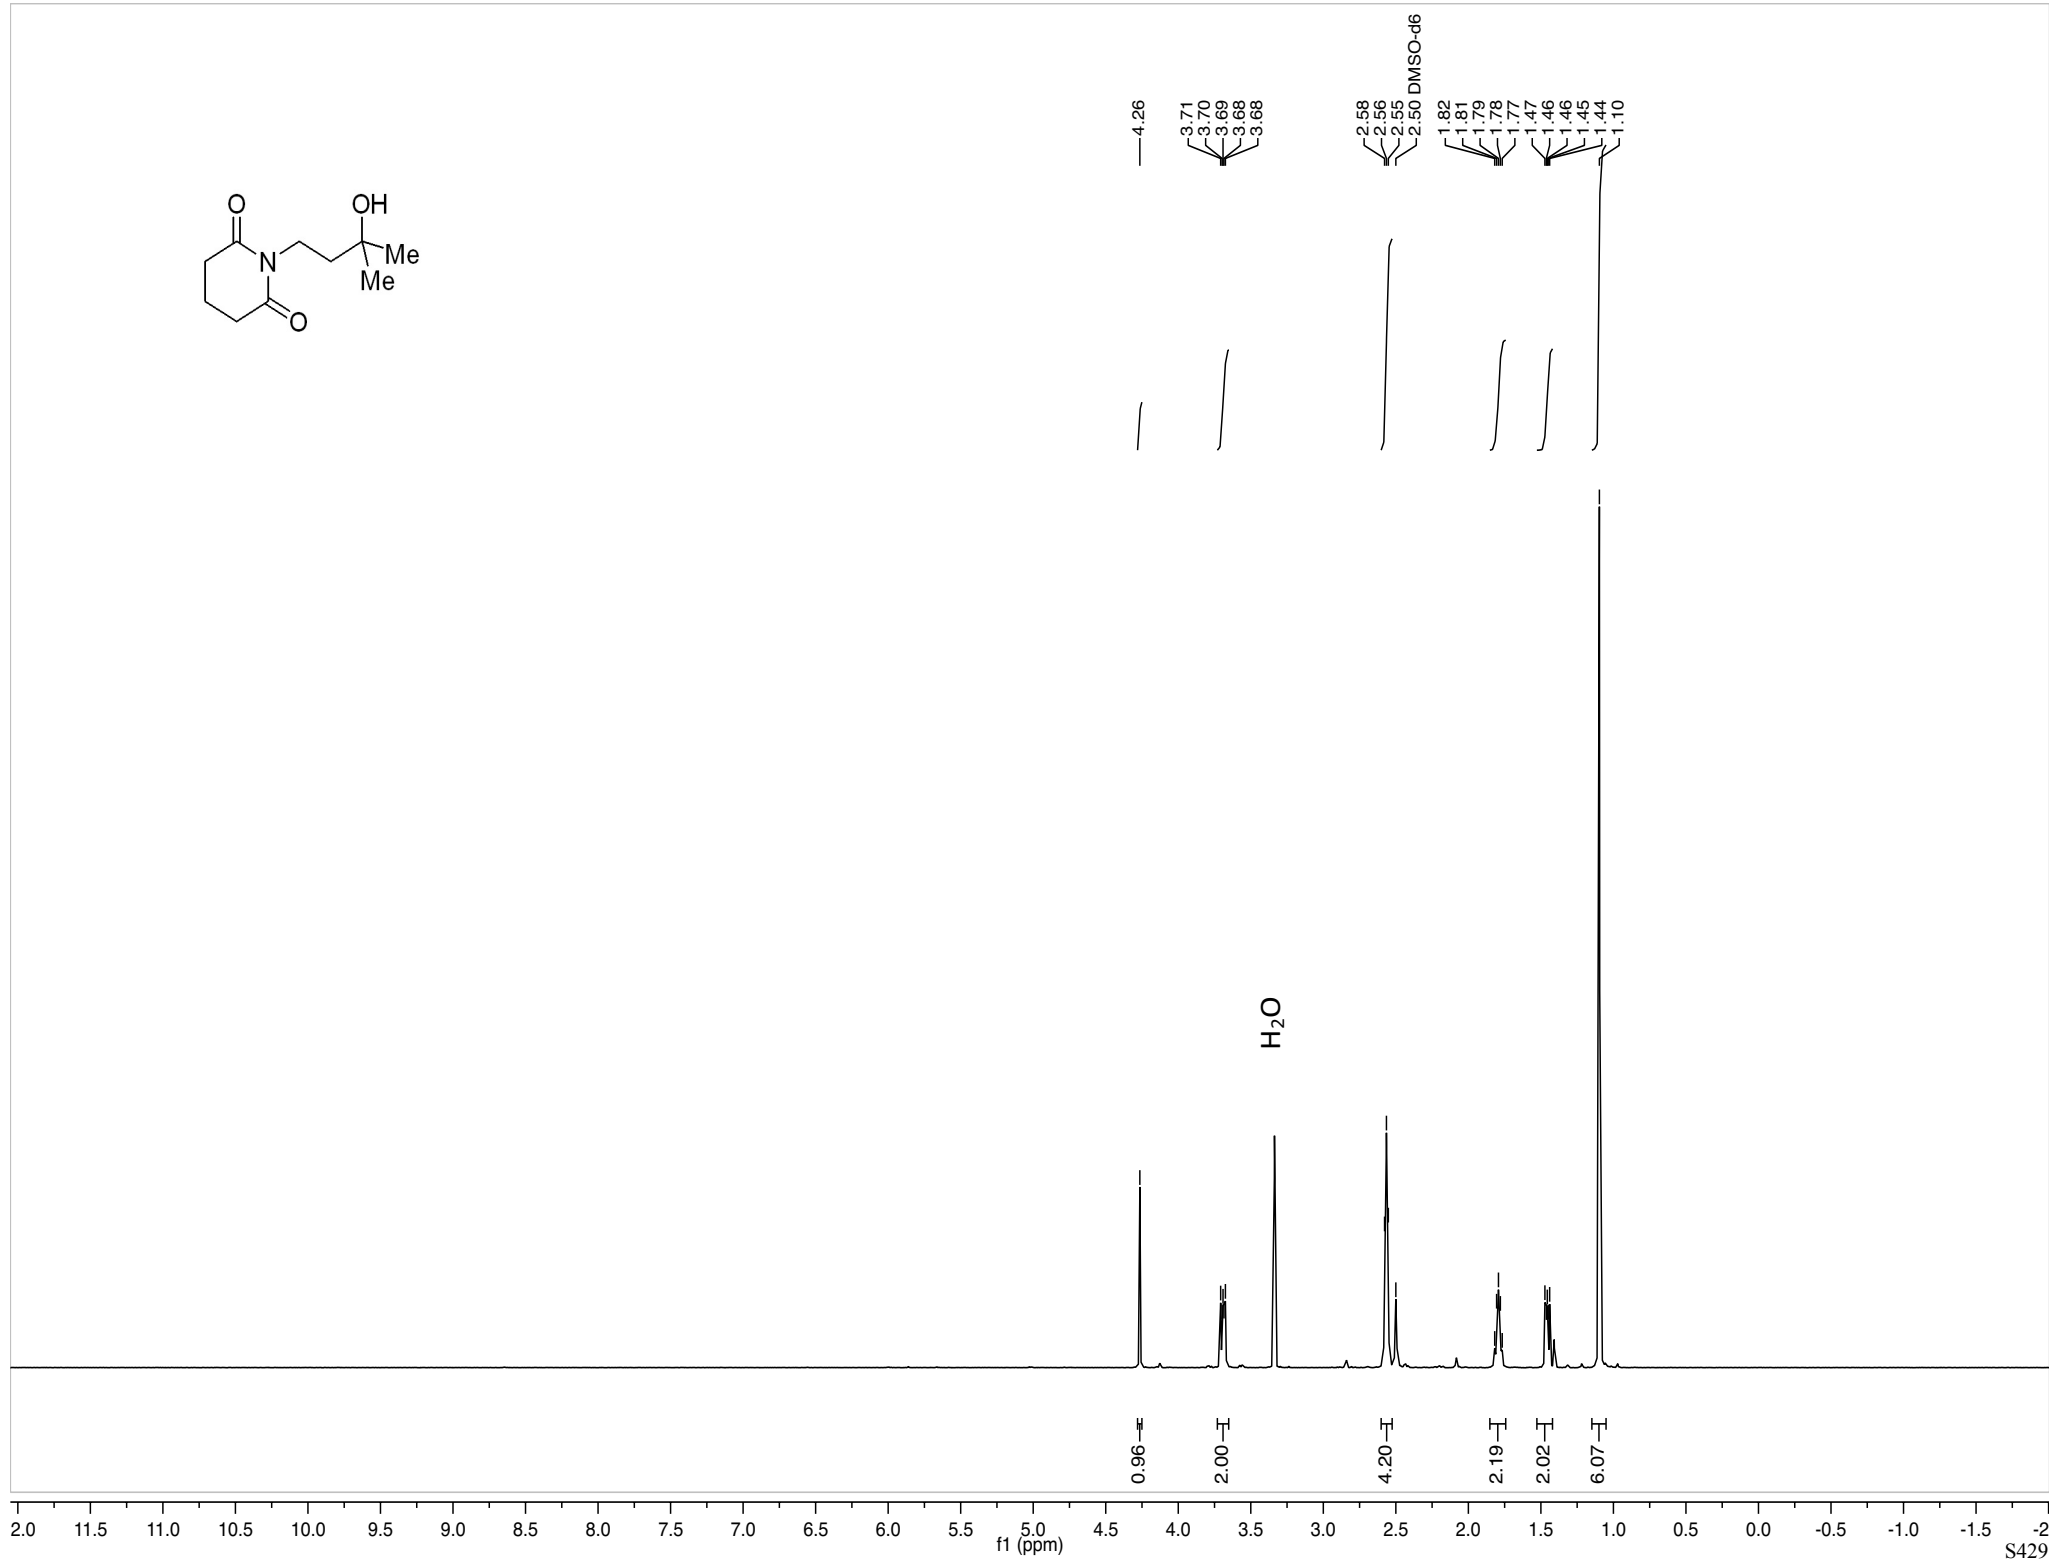

|    | Parameter              | Value           |
|----|------------------------|-----------------|
| 1  | Origin                 | Varian          |
| 2  | Spectrometer           | inova           |
| 3  | Solvent                | DMSO            |
| 4  | Temperature            | 20.0            |
| 5  | Pulse Sequence         | s2pul           |
| 6  | Experiment             | 1D              |
| 7  | Probe                  | QUAD            |
| 8  | Number of Scans        | 256             |
| 9  | Receiver Gain          | 60              |
| 10 | Relaxation Delay       | 1.0000          |
| 11 | Pulse Width            | 0.0000          |
| 12 | Acquisition Time       | 1.0863          |
| 13 | Spectrometer Frequency | 125.66          |
| 14 | Spectral Width         | 30165.9         |
| 15 | Lowest Frequency       | -1260.2         |
| 16 | Nucleus                | <sup>13</sup> C |
| 17 | Acquired Size          | 32768           |
| 18 | Spectral Size          | 65536           |

—39.52 DMSO-d6

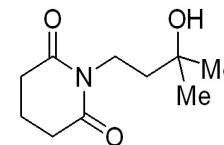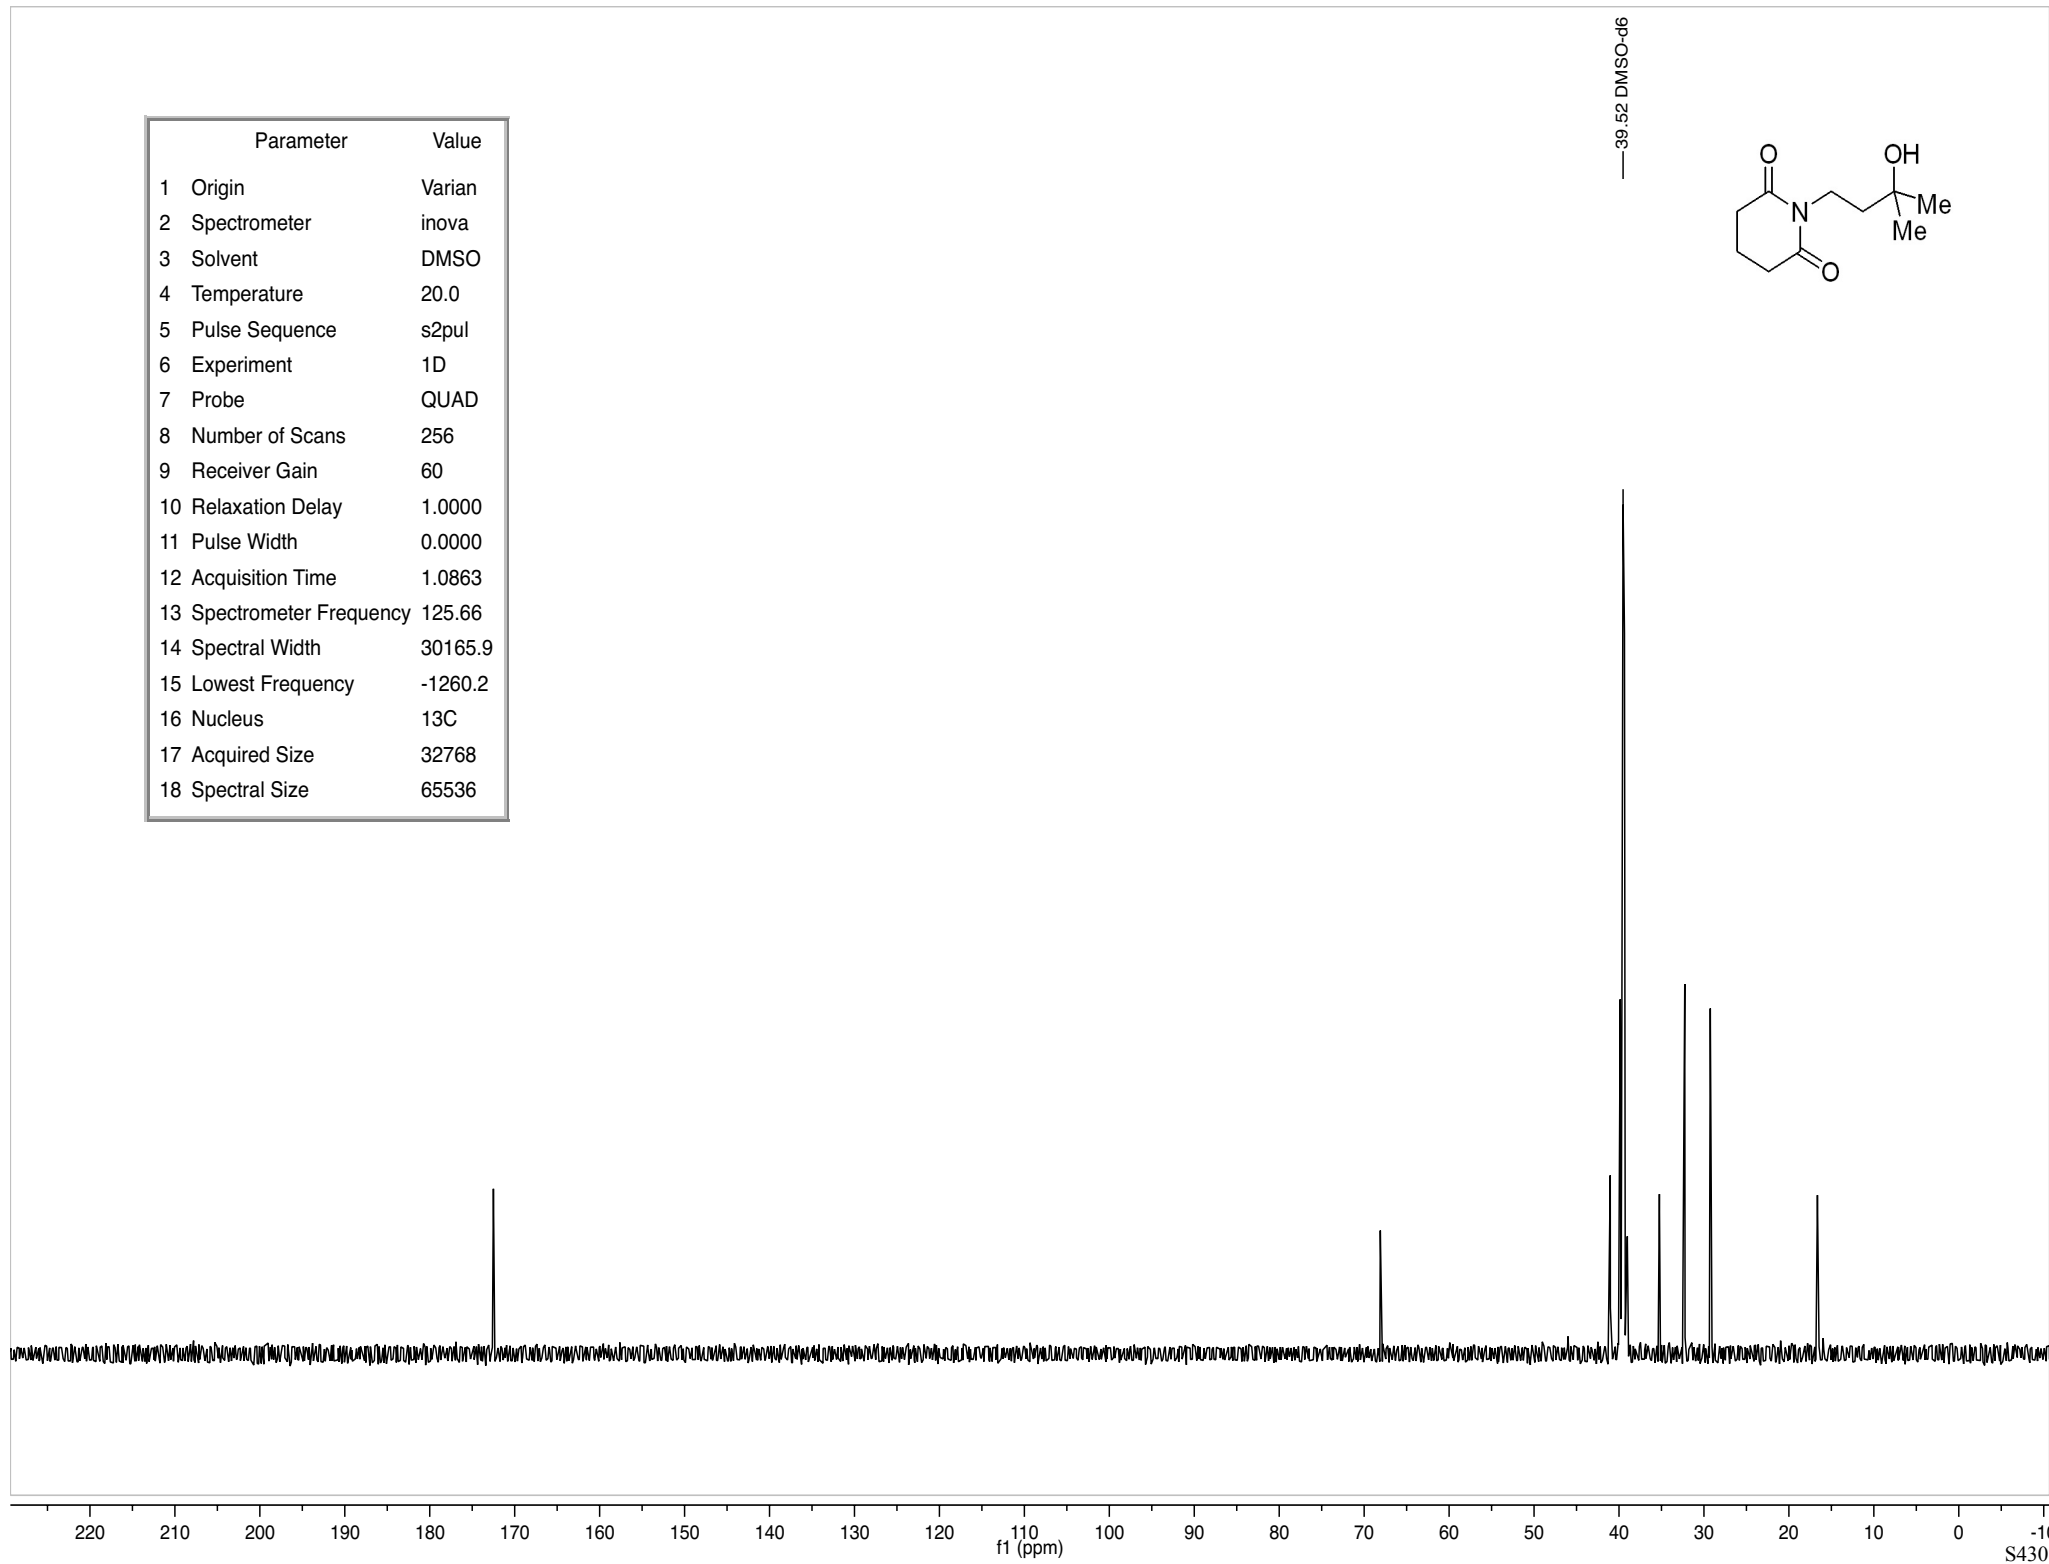

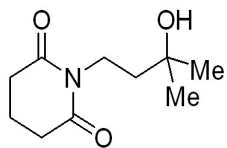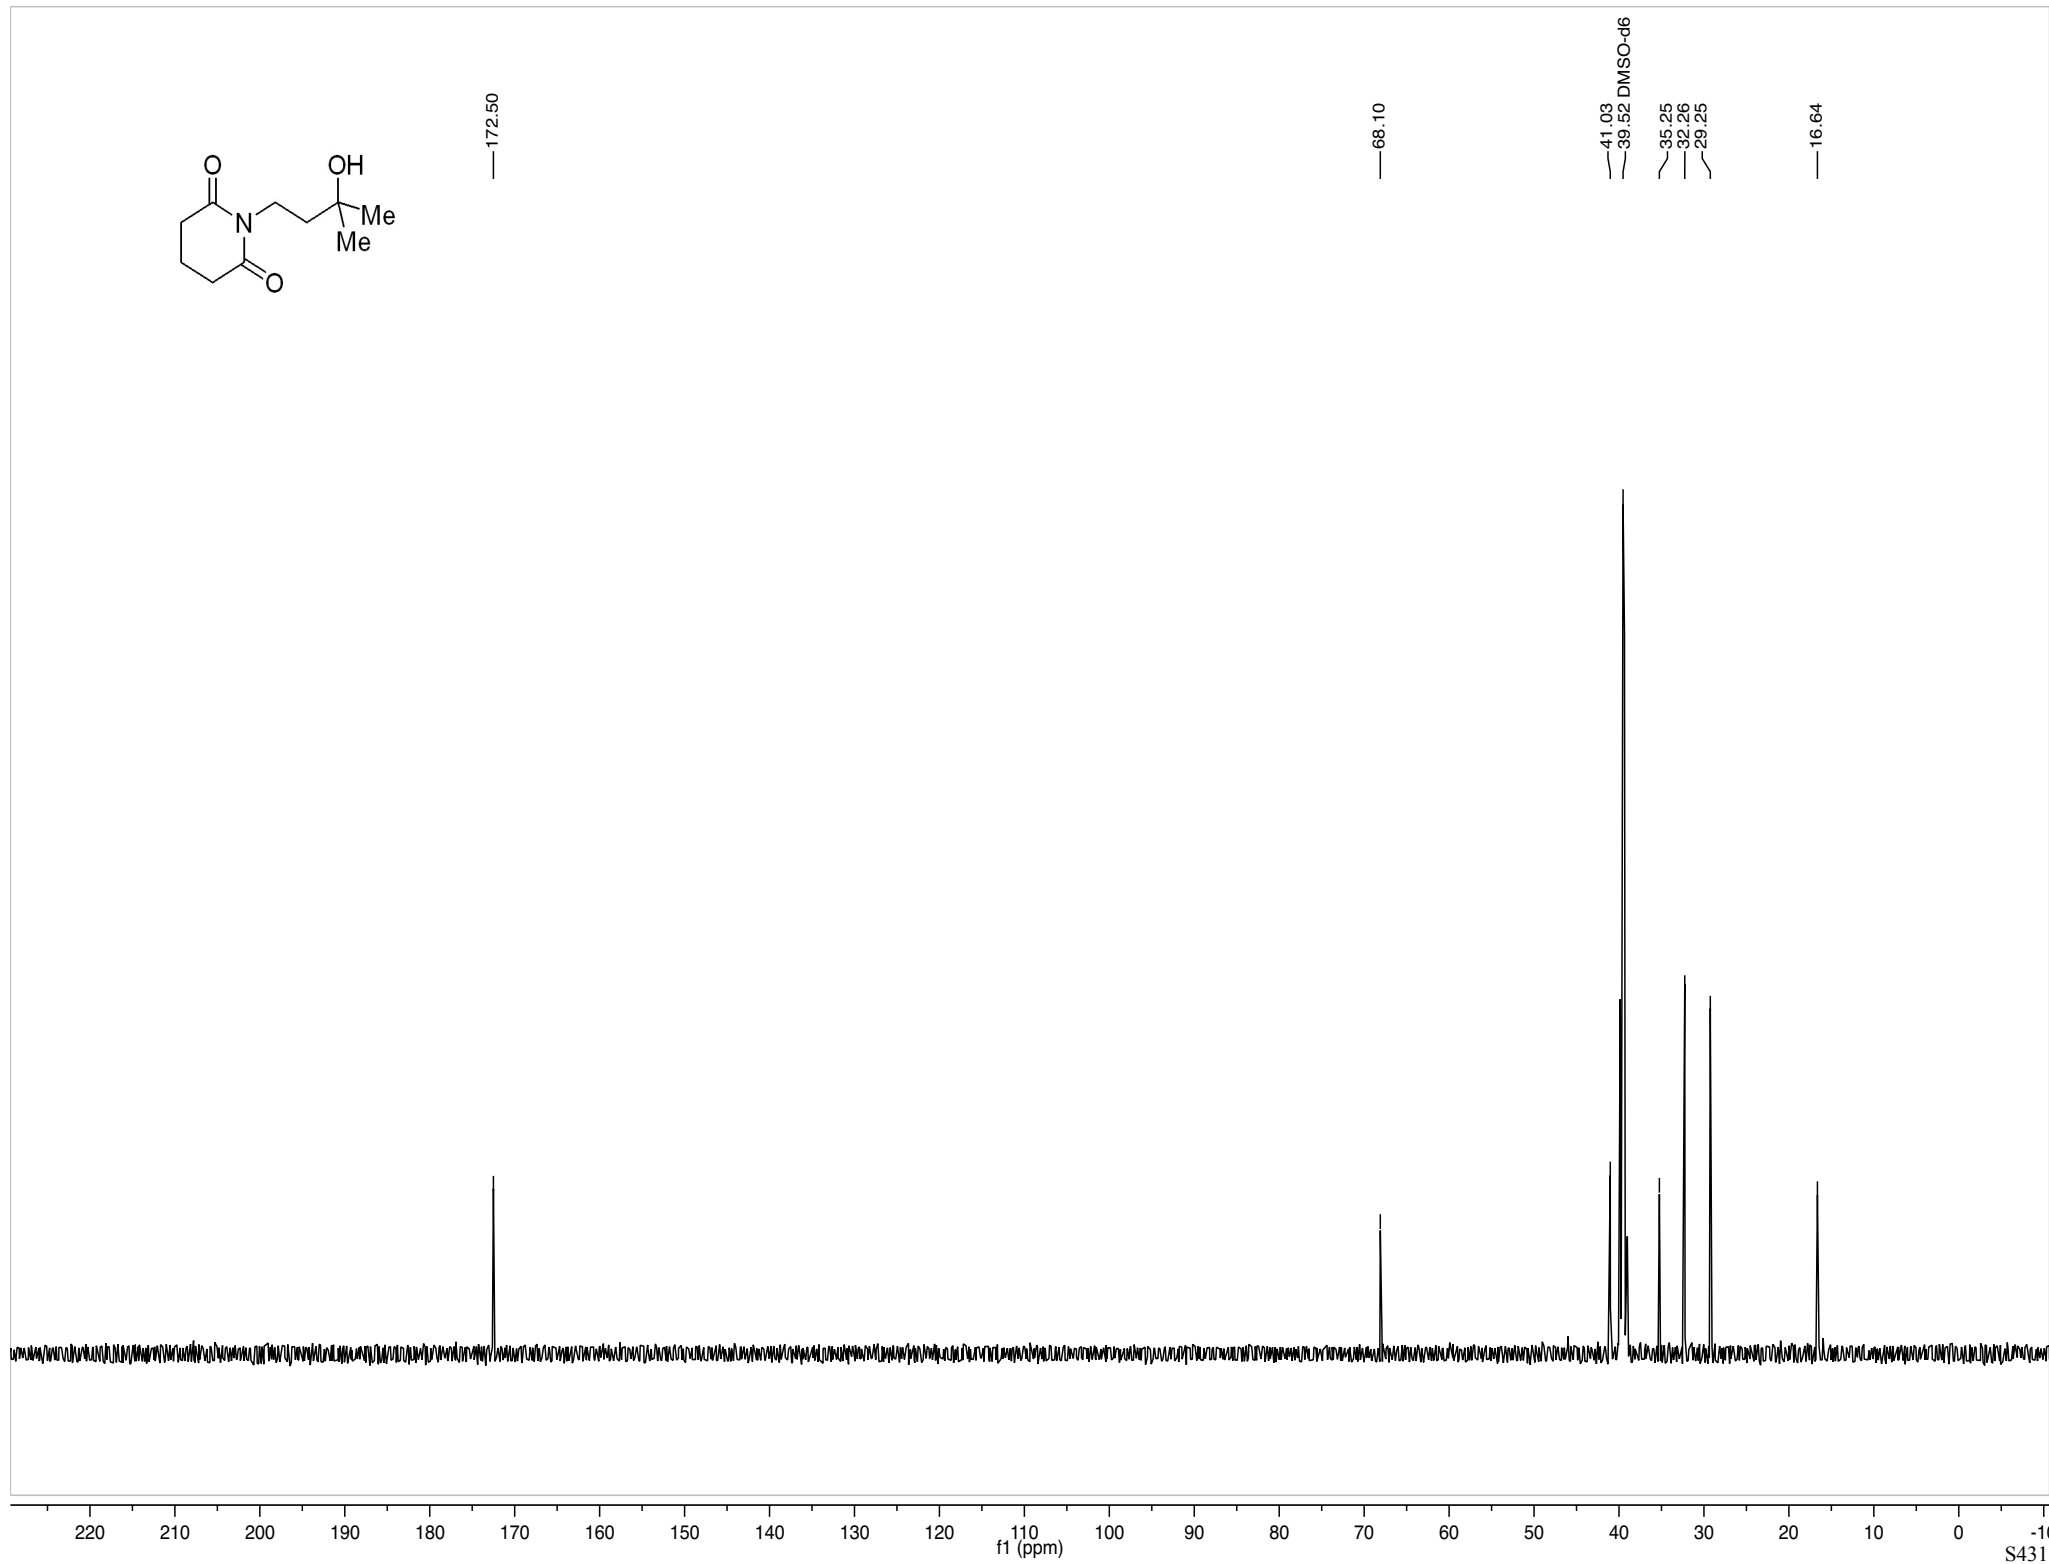



|    | Parameter              | Value             |
|----|------------------------|-------------------|
| 1  | Origin                 | Varian            |
| 2  | Spectrometer           | inova             |
| 3  | Solvent                | CDCl <sub>3</sub> |
| 4  | Temperature            | 40.0              |
| 5  | Pulse Sequence         | s2pul             |
| 6  | Experiment             | 1D                |
| 7  | Probe                  | QUAD              |
| 8  | Number of Scans        | 8                 |
| 9  | Receiver Gain          | 46                |
| 10 | Relaxation Delay       | 0.0000            |
| 11 | Pulse Width            | 0.0000            |
| 12 | Acquisition Time       | 4.6645            |
| 13 | Spectrometer Frequency | 499.69            |
| 14 | Spectral Width         | 7024.9            |
| 15 | Lowest Frequency       | -1011.4           |
| 16 | Nucleus                | <sup>1</sup> H    |
| 17 | Acquired Size          | 32768             |
| 18 | Spectral Size          | 65536             |

7.3 CDCl<sub>3</sub>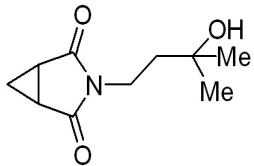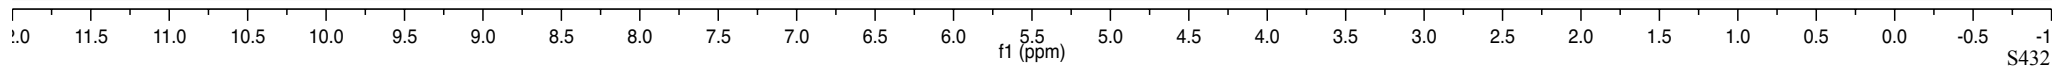

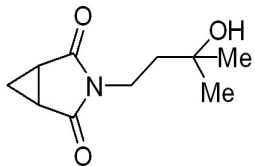

— 7.26 CDCl<sub>3</sub>

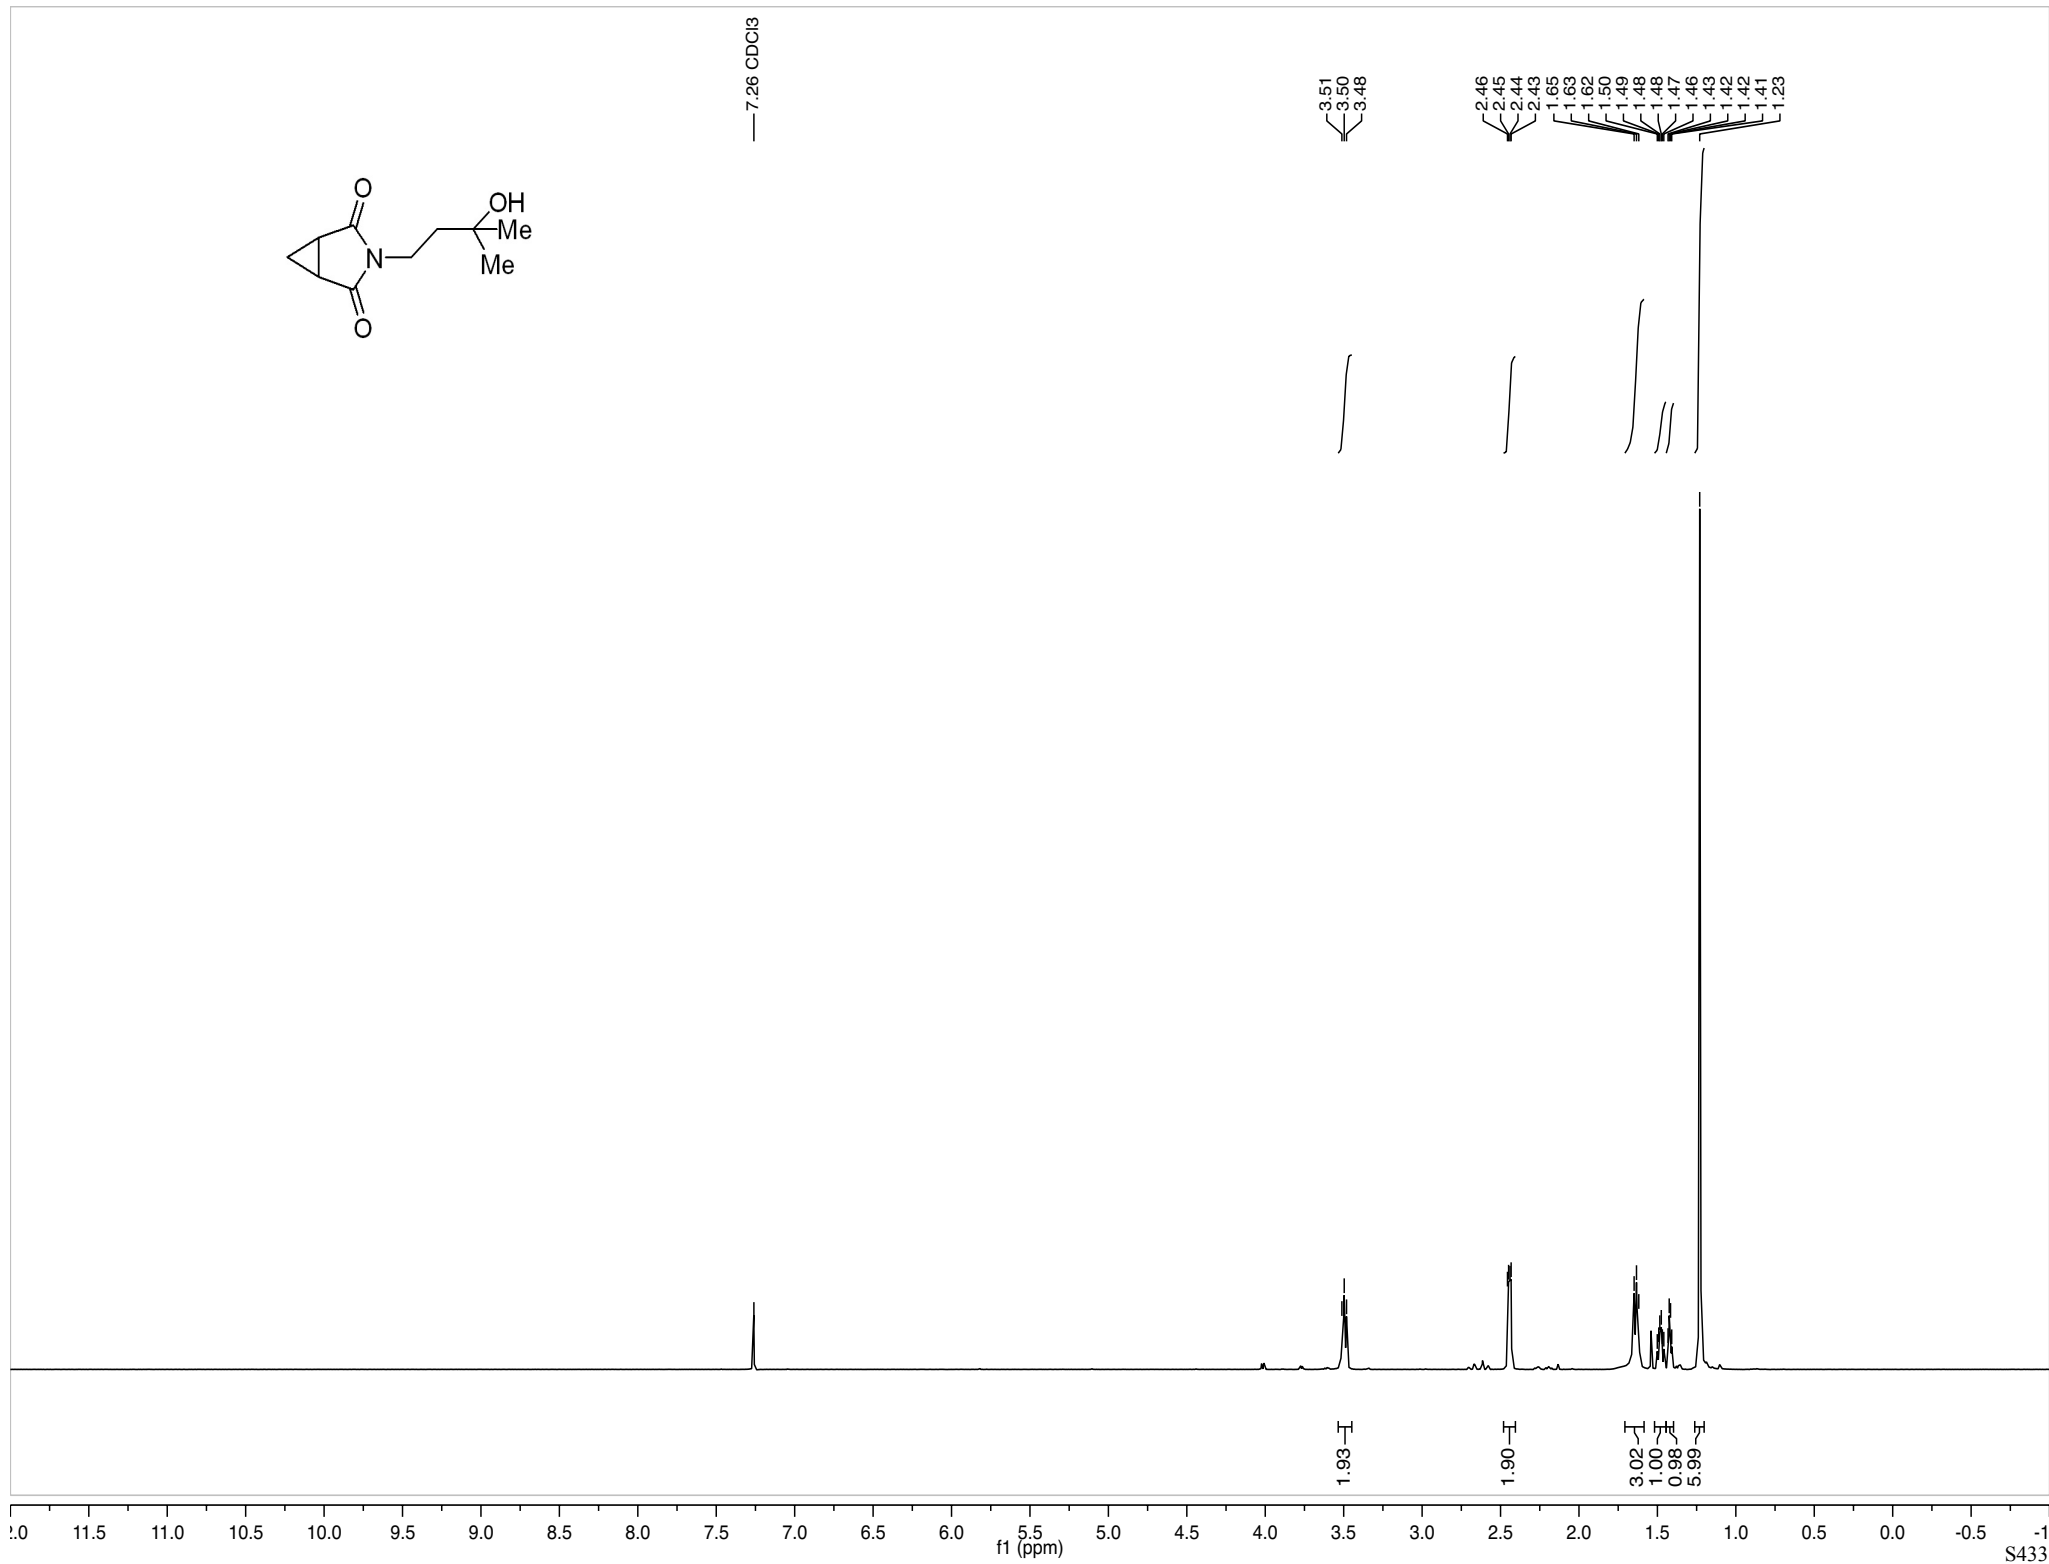

| Parameter                 | Value           |
|---------------------------|-----------------|
| 1 Origin                  | Varian          |
| 2 Spectrometer            | inova           |
| 3 Solvent                 | CDCl3           |
| 4 Temperature             | 40.0            |
| 5 Pulse Sequence          | s2pul           |
| 6 Experiment              | 1D              |
| 7 Probe                   | QUAD            |
| 8 Number of Scans         | 192             |
| 9 Receiver Gain           | 60              |
| 10 Relaxation Delay       | 1.0000          |
| 11 Pulse Width            | 0.0000          |
| 12 Acquisition Time       | 1.0863          |
| 13 Spectrometer Frequency | 125.66          |
| 14 Spectral Width         | 30165.9         |
| 15 Lowest Frequency       | -1271.8         |
| 16 Nucleus                | <sup>13</sup> C |
| 17 Acquired Size          | 32768           |
| 18 Spectral Size          | 65536           |

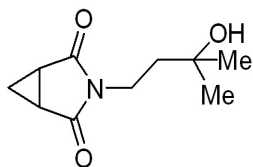

— 77.2 CDCl<sub>3</sub>

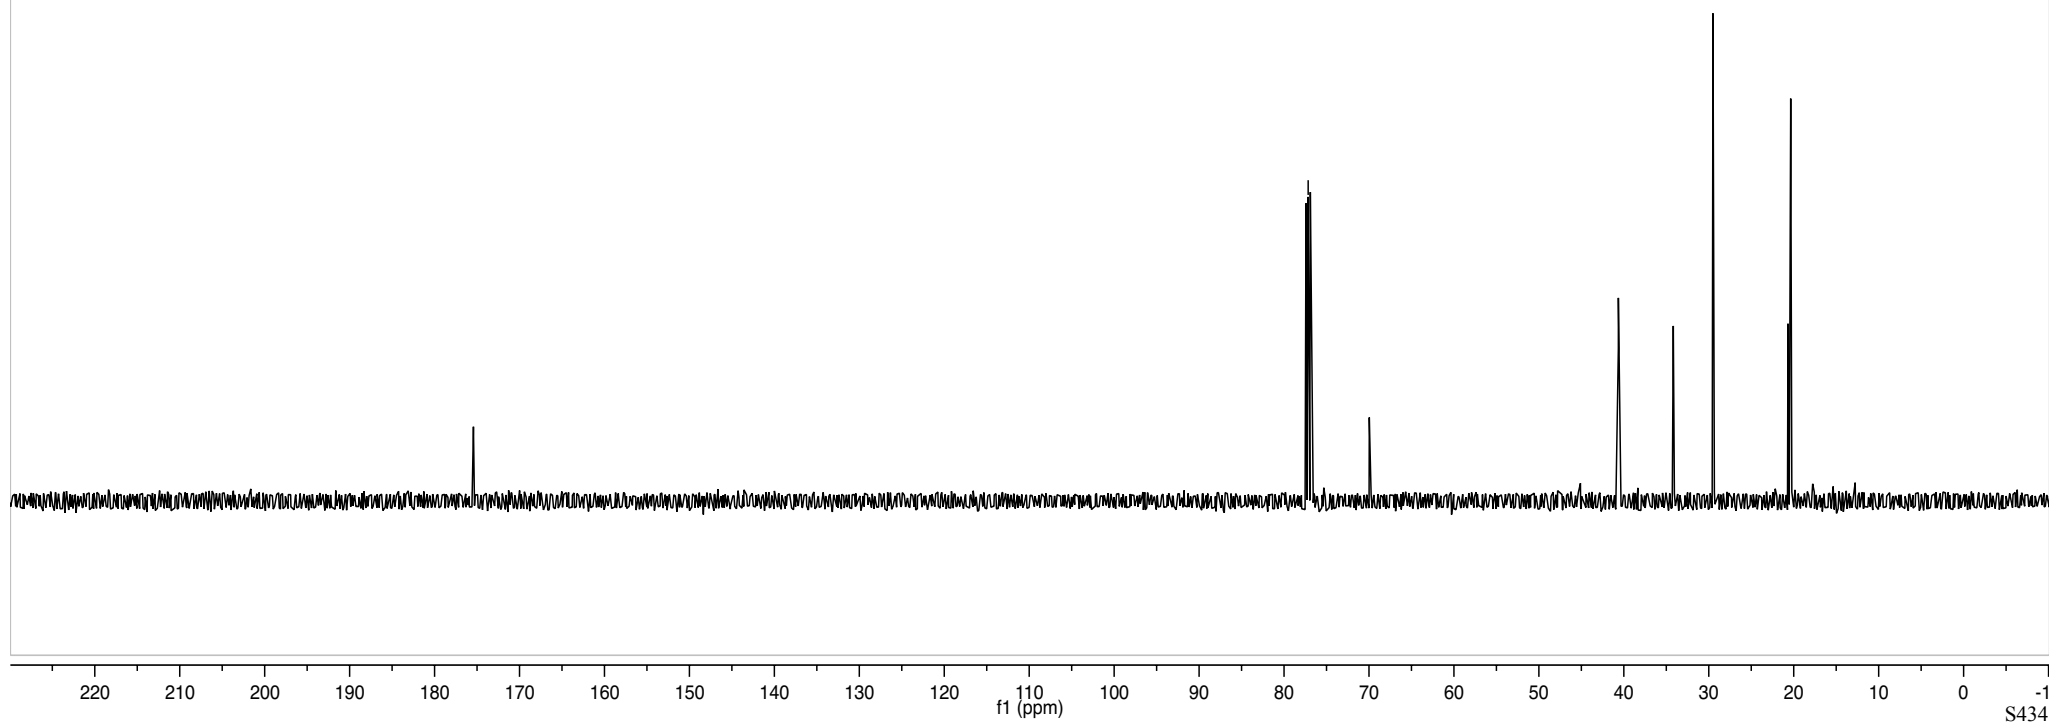

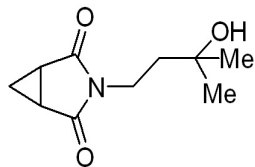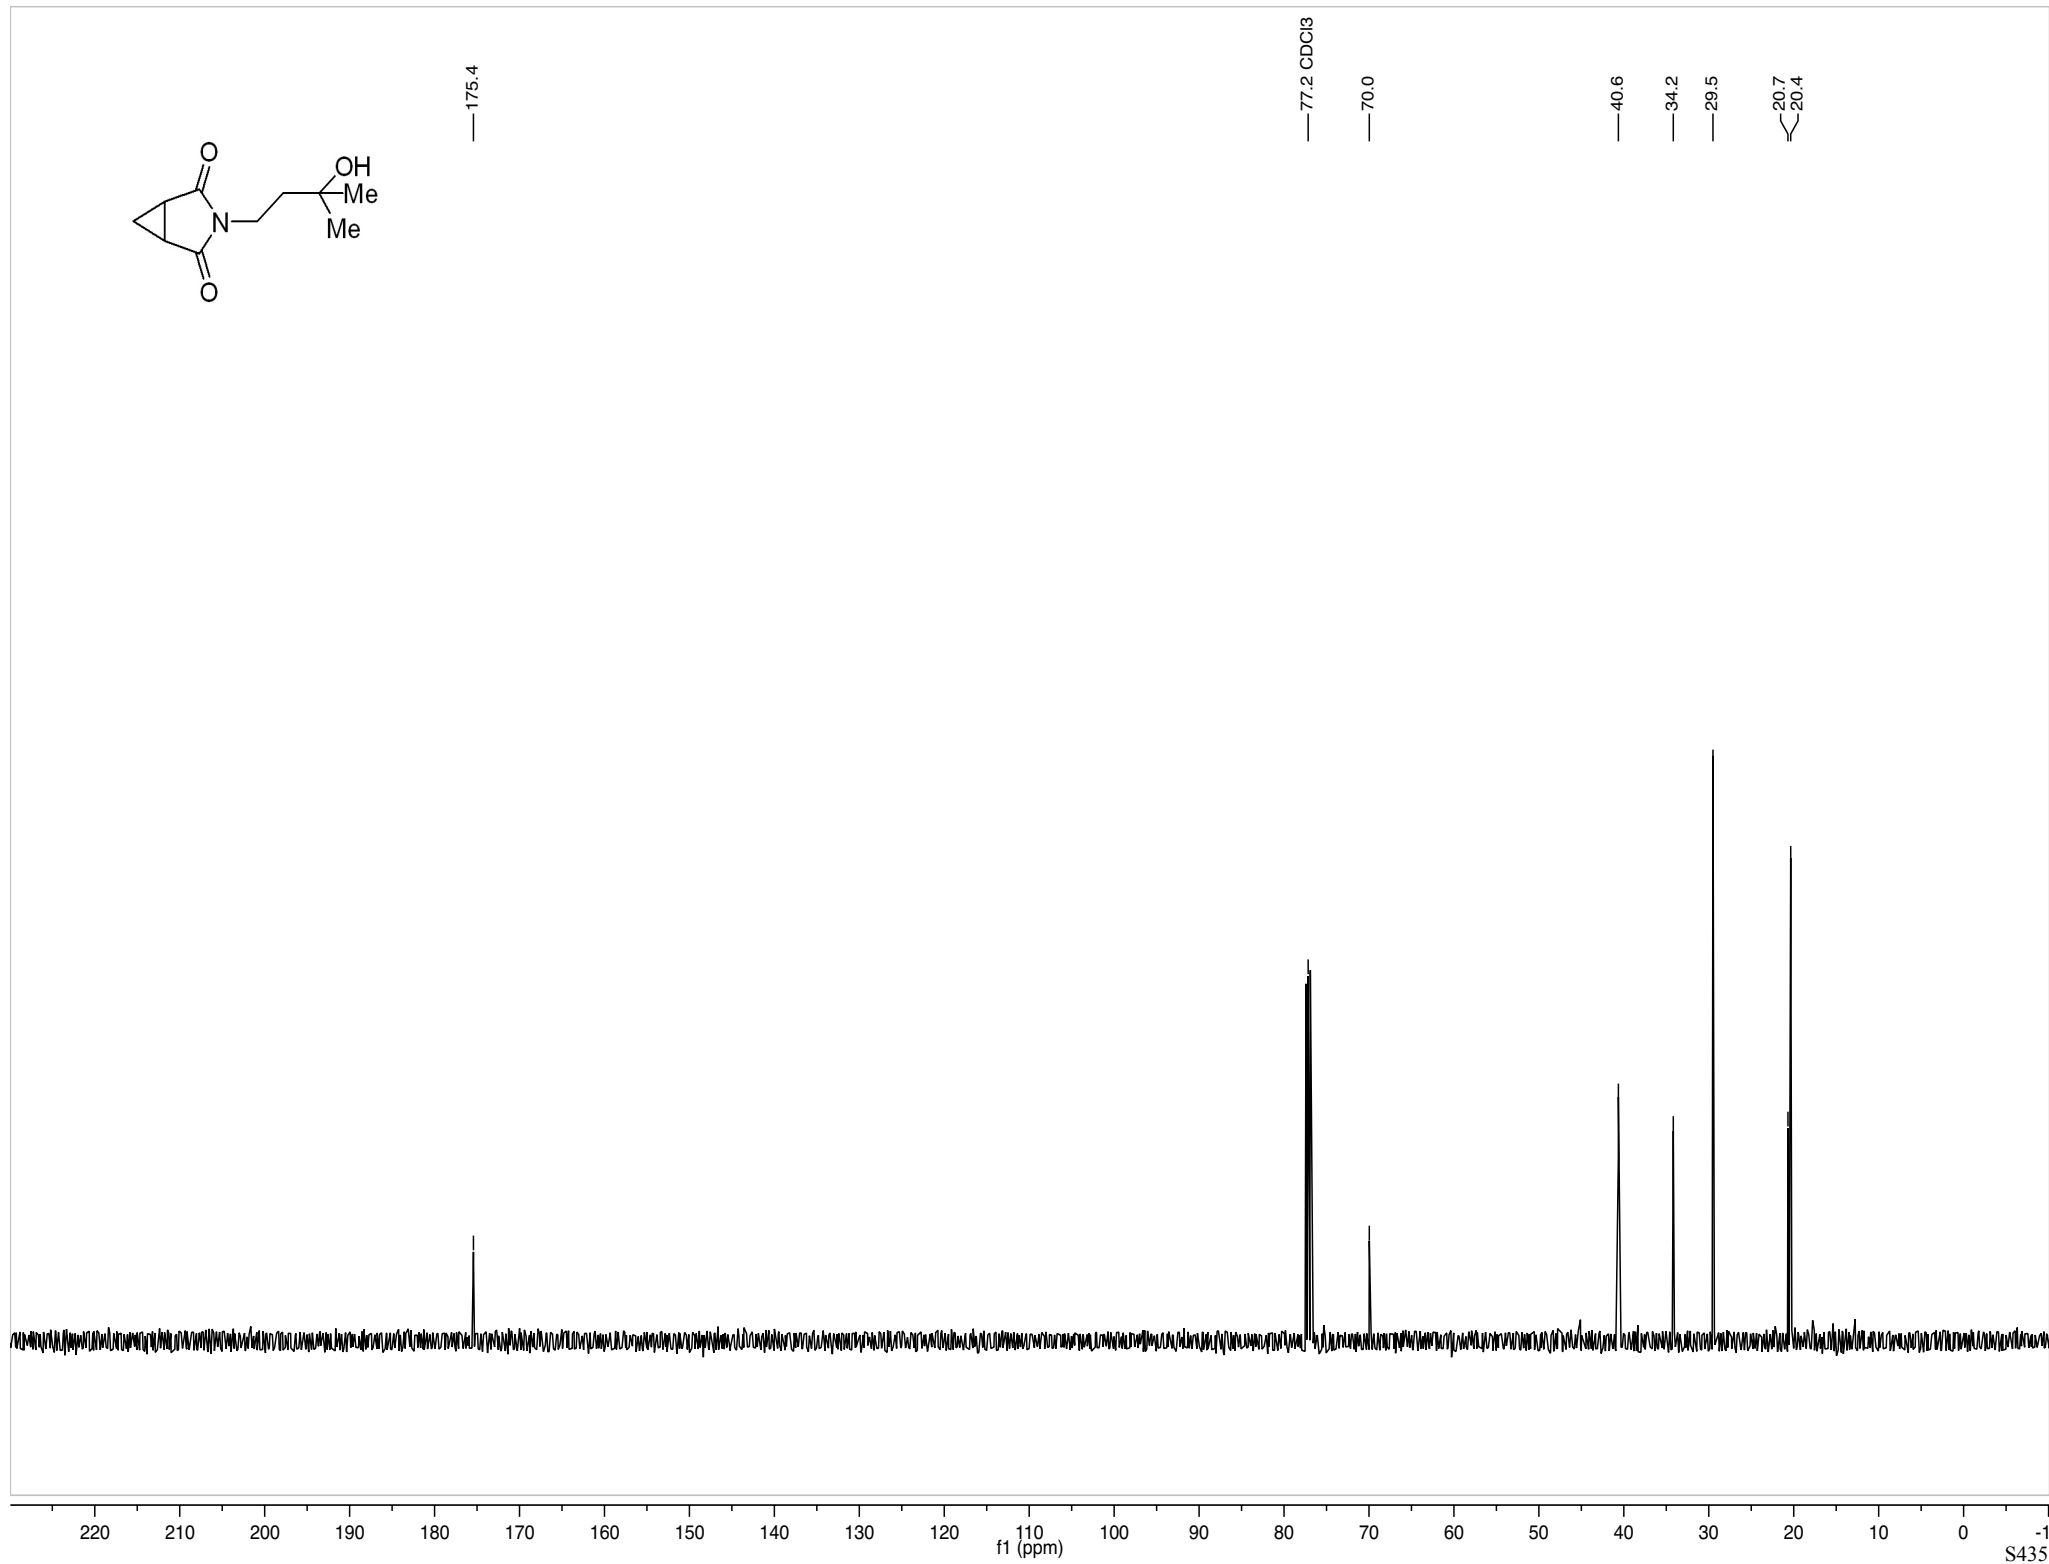

| Parameter                 | Value          |
|---------------------------|----------------|
| 1 Origin                  | Varian         |
| 2 Spectrometer            | inova          |
| 3 Solvent                 | CDCl3          |
| 4 Temperature             | 20.0           |
| 5 Pulse Sequence          | s2pul          |
| 6 Experiment              | 1D             |
| 7 Probe                   | QUAD           |
| 8 Number of Scans         | 8              |
| 9 Receiver Gain           | 46             |
| 10 Relaxation Delay       | 0.0000         |
| 11 Pulse Width            | 0.0000         |
| 12 Acquisition Time       | 4.6645         |
| 13 Spectrometer Frequency | 499.69         |
| 14 Spectral Width         | 7024.9         |
| 15 Lowest Frequency       | -1011.9        |
| 16 Nucleus                | <sup>1</sup> H |
| 17 Acquired Size          | 32768          |
| 18 Spectral Size          | 65536          |

—7.3 CDCl<sub>3</sub>

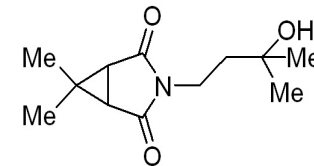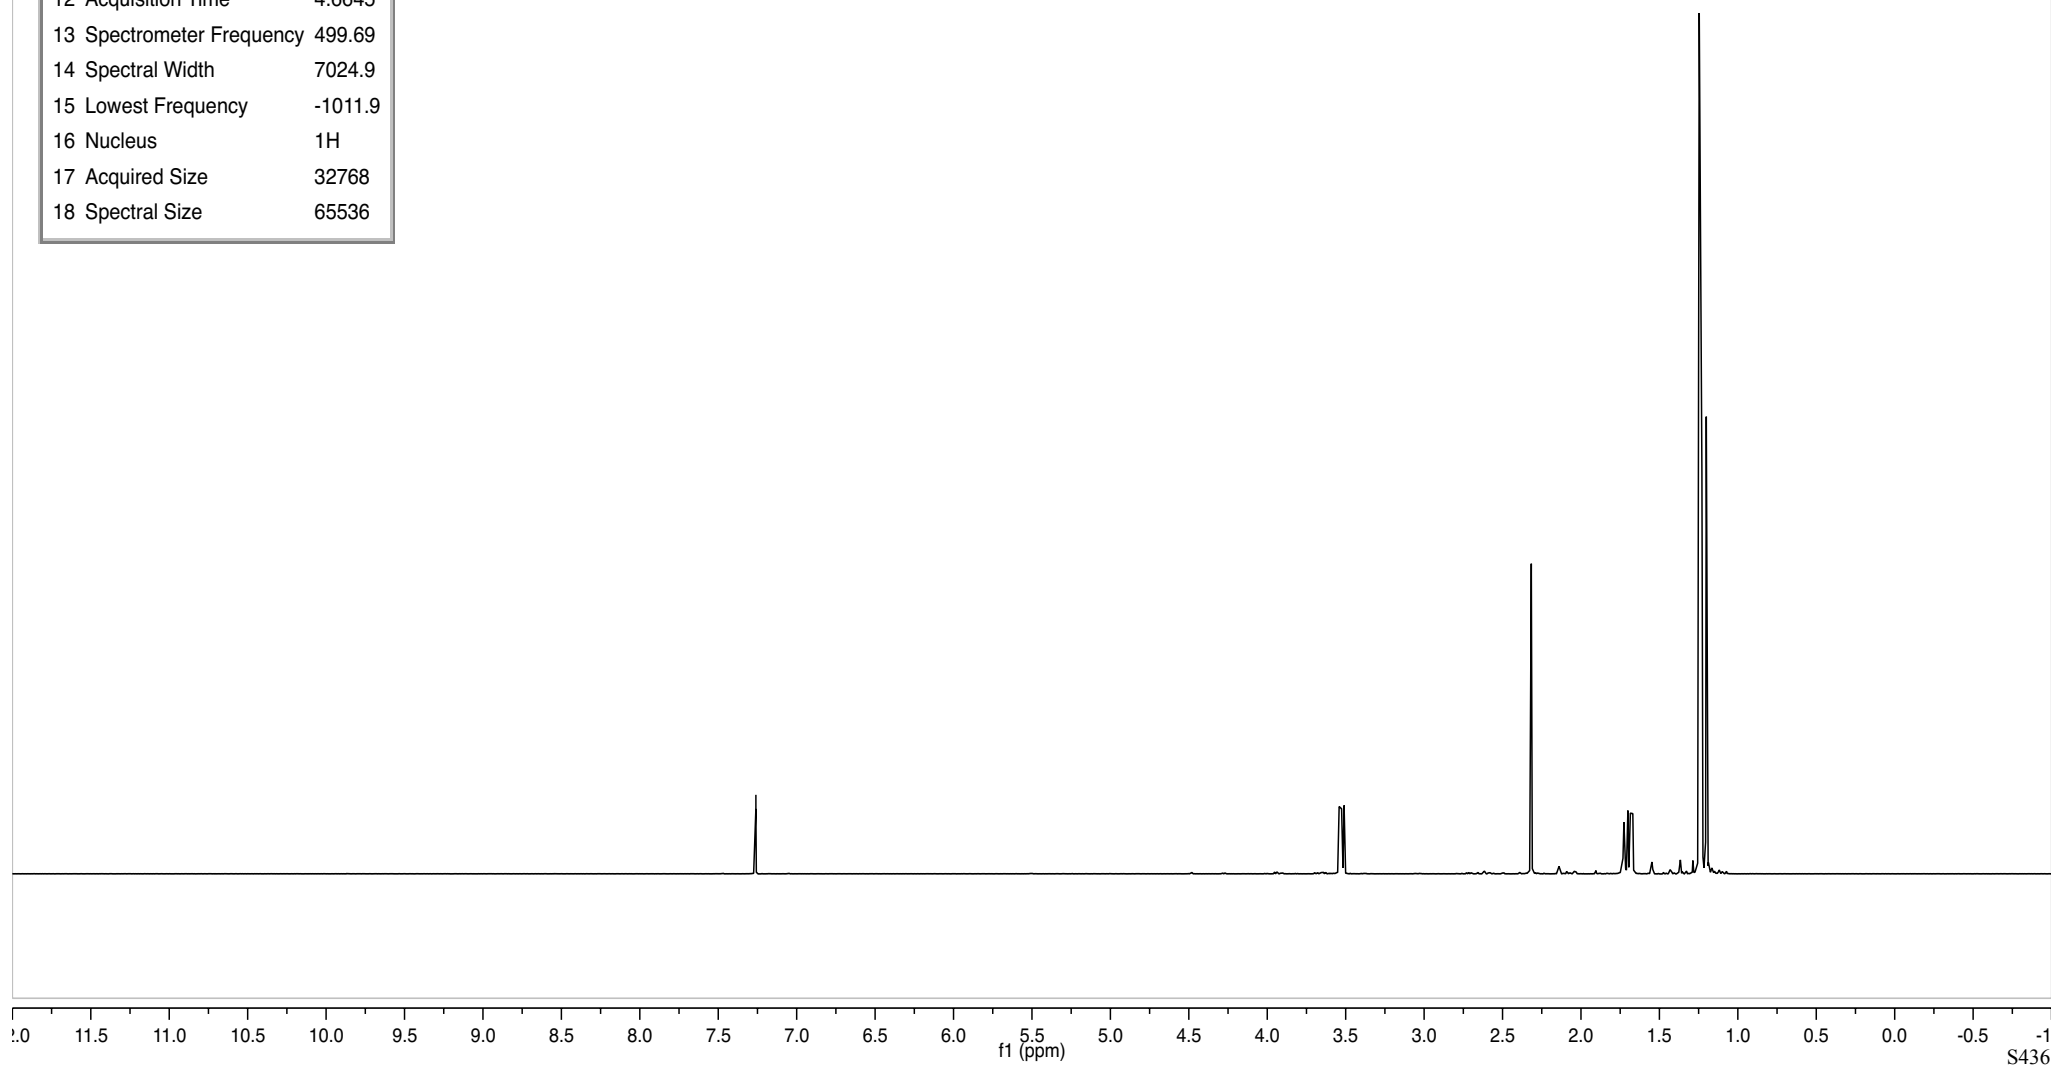

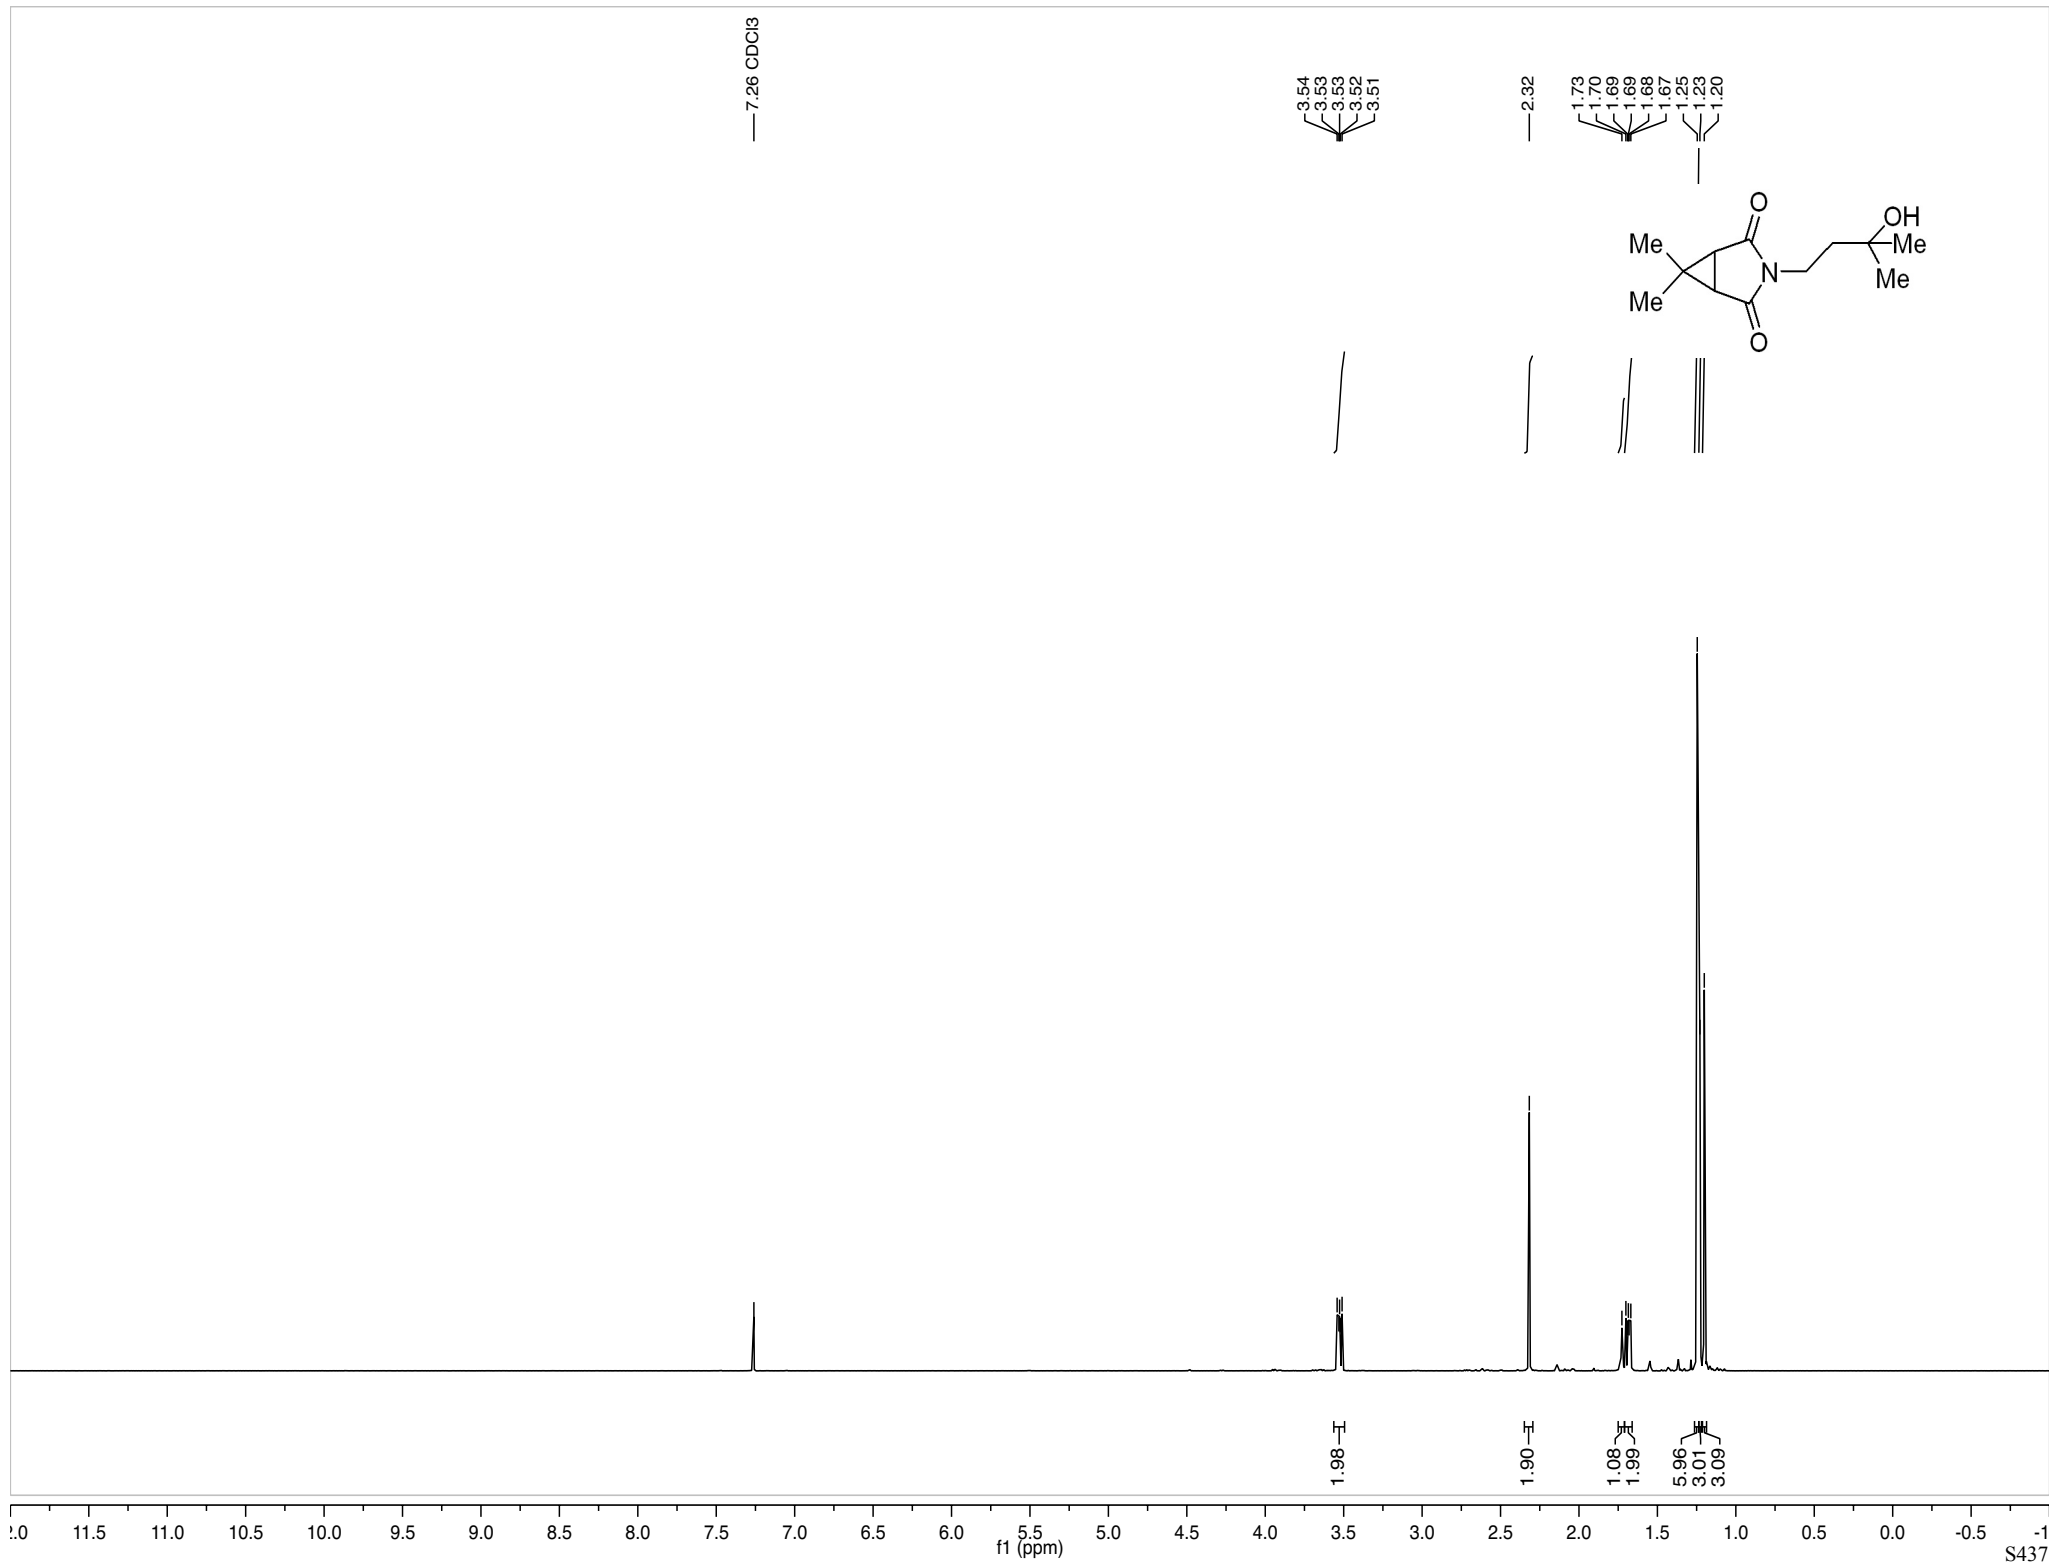

| Parameter                 | Value           |
|---------------------------|-----------------|
| 1 Origin                  | Varian          |
| 2 Spectrometer            | inova           |
| 3 Solvent                 | CDCl3           |
| 4 Temperature             | 20.0            |
| 5 Pulse Sequence          | s2pul           |
| 6 Experiment              | 1D              |
| 7 Probe                   | QUAD            |
| 8 Number of Scans         | 256             |
| 9 Receiver Gain           | 60              |
| 10 Relaxation Delay       | 1.0000          |
| 11 Pulse Width            | 0.0000          |
| 12 Acquisition Time       | 1.0863          |
| 13 Spectrometer Frequency | 125.66          |
| 14 Spectral Width         | 30165.9         |
| 15 Lowest Frequency       | -1271.5         |
| 16 Nucleus                | <sup>13</sup> C |
| 17 Acquired Size          | 32768           |
| 18 Spectral Size          | 65536           |

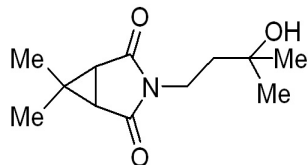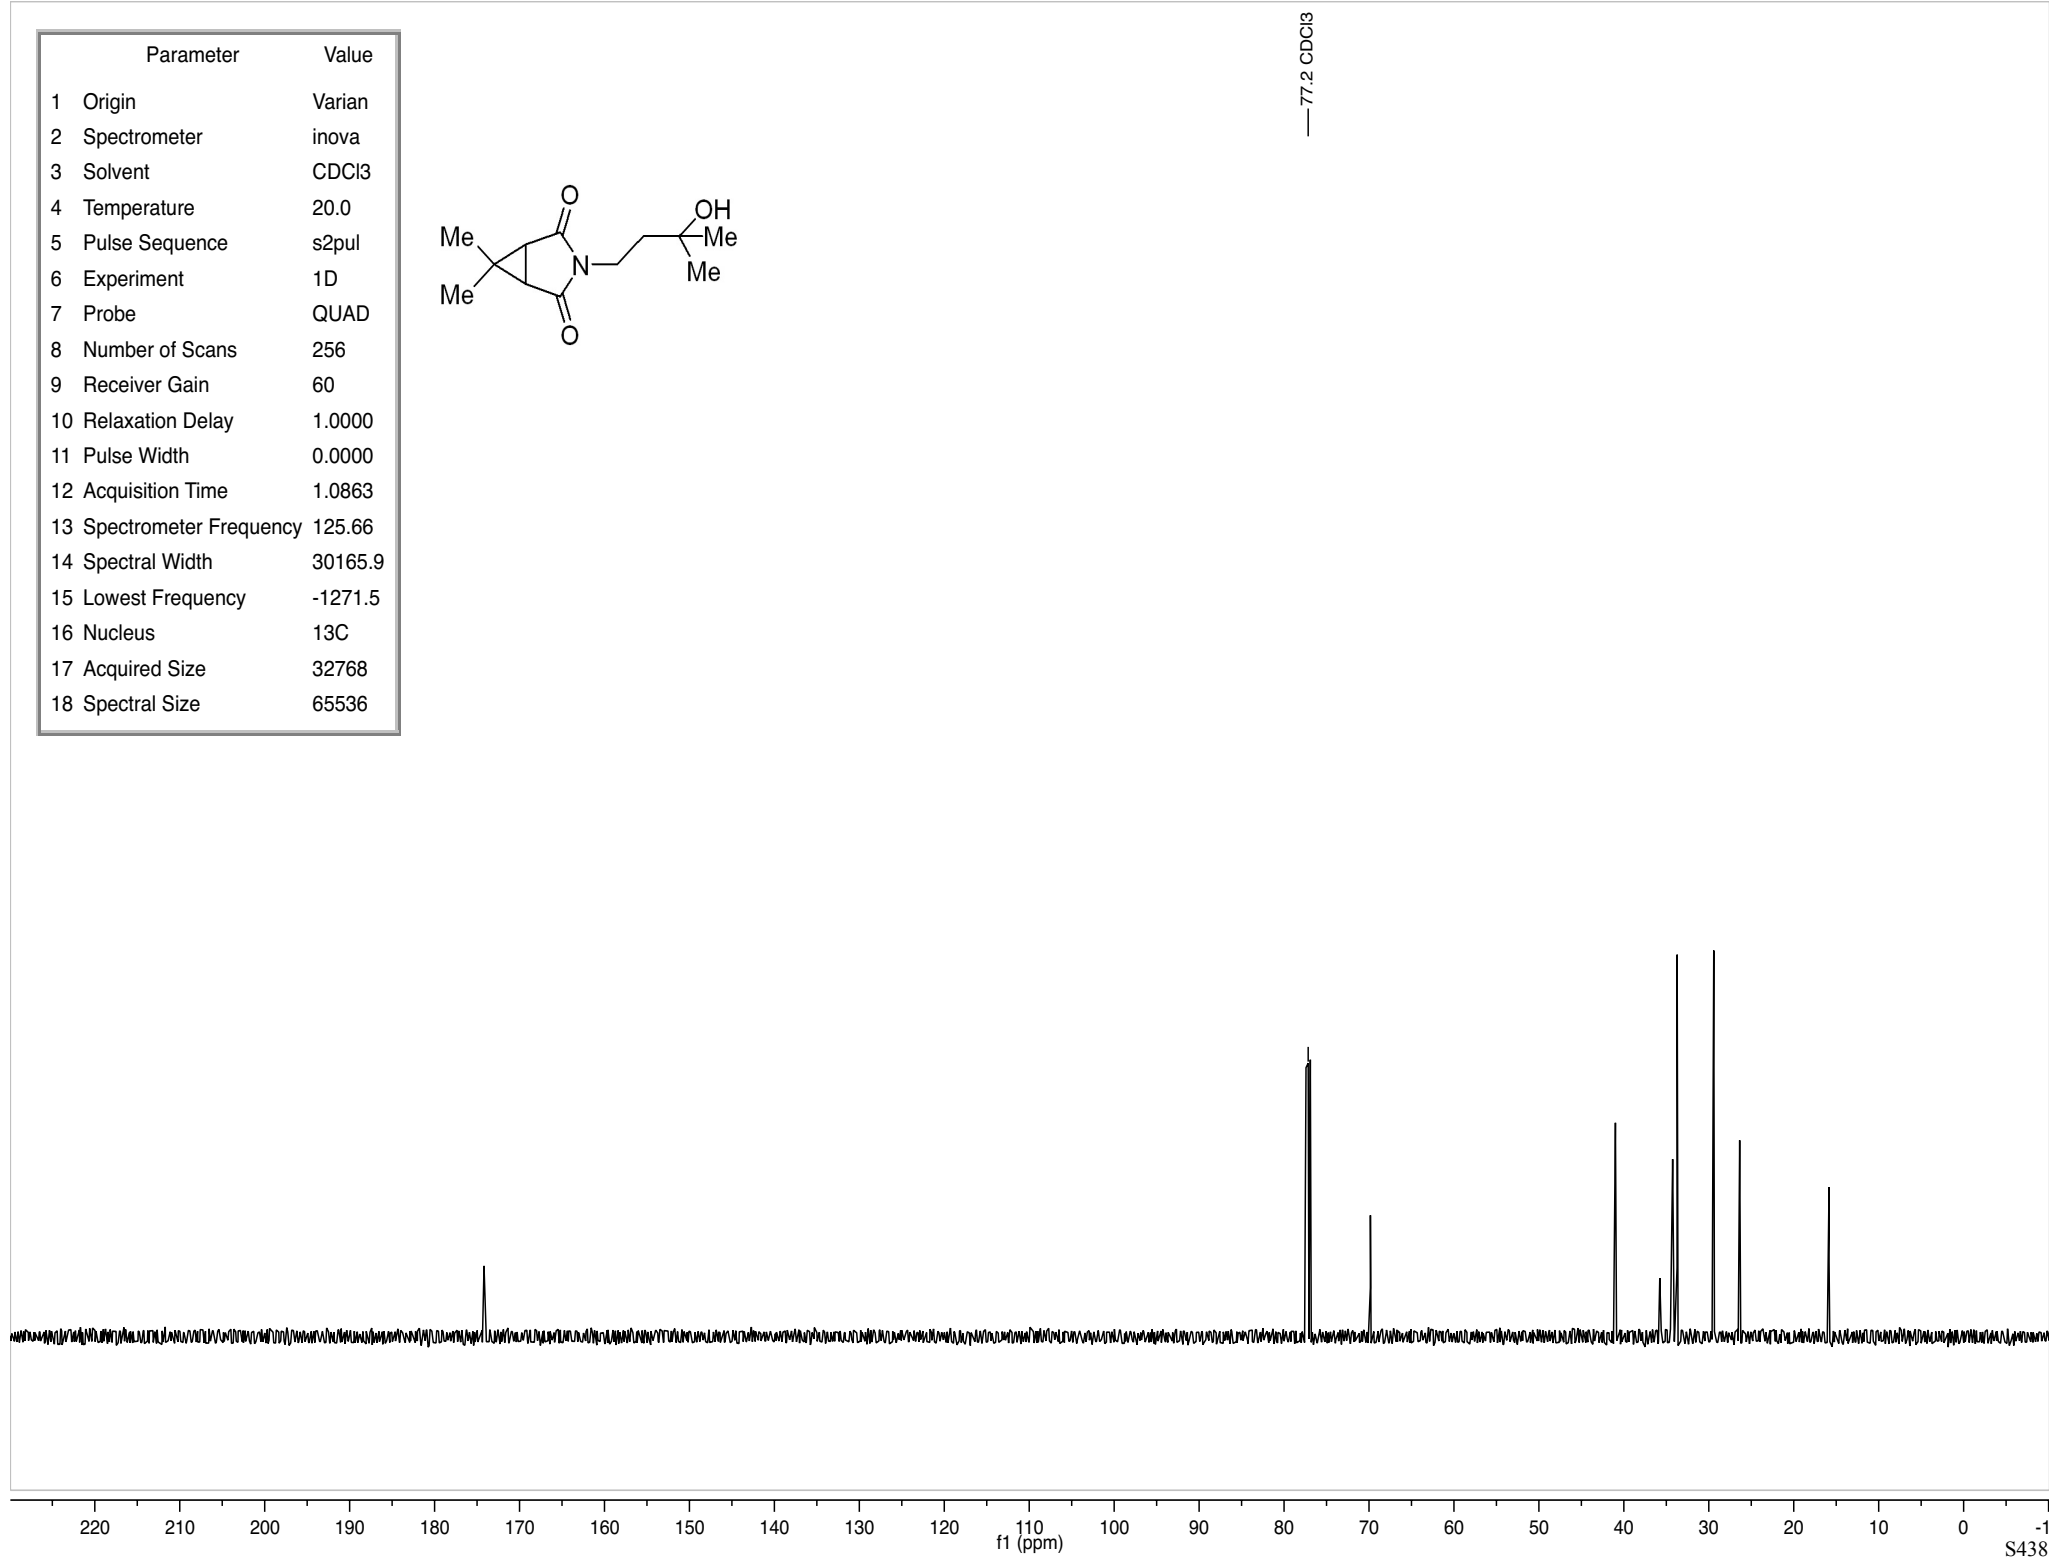

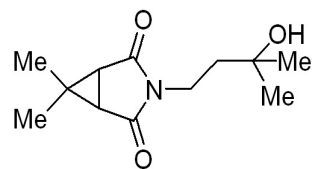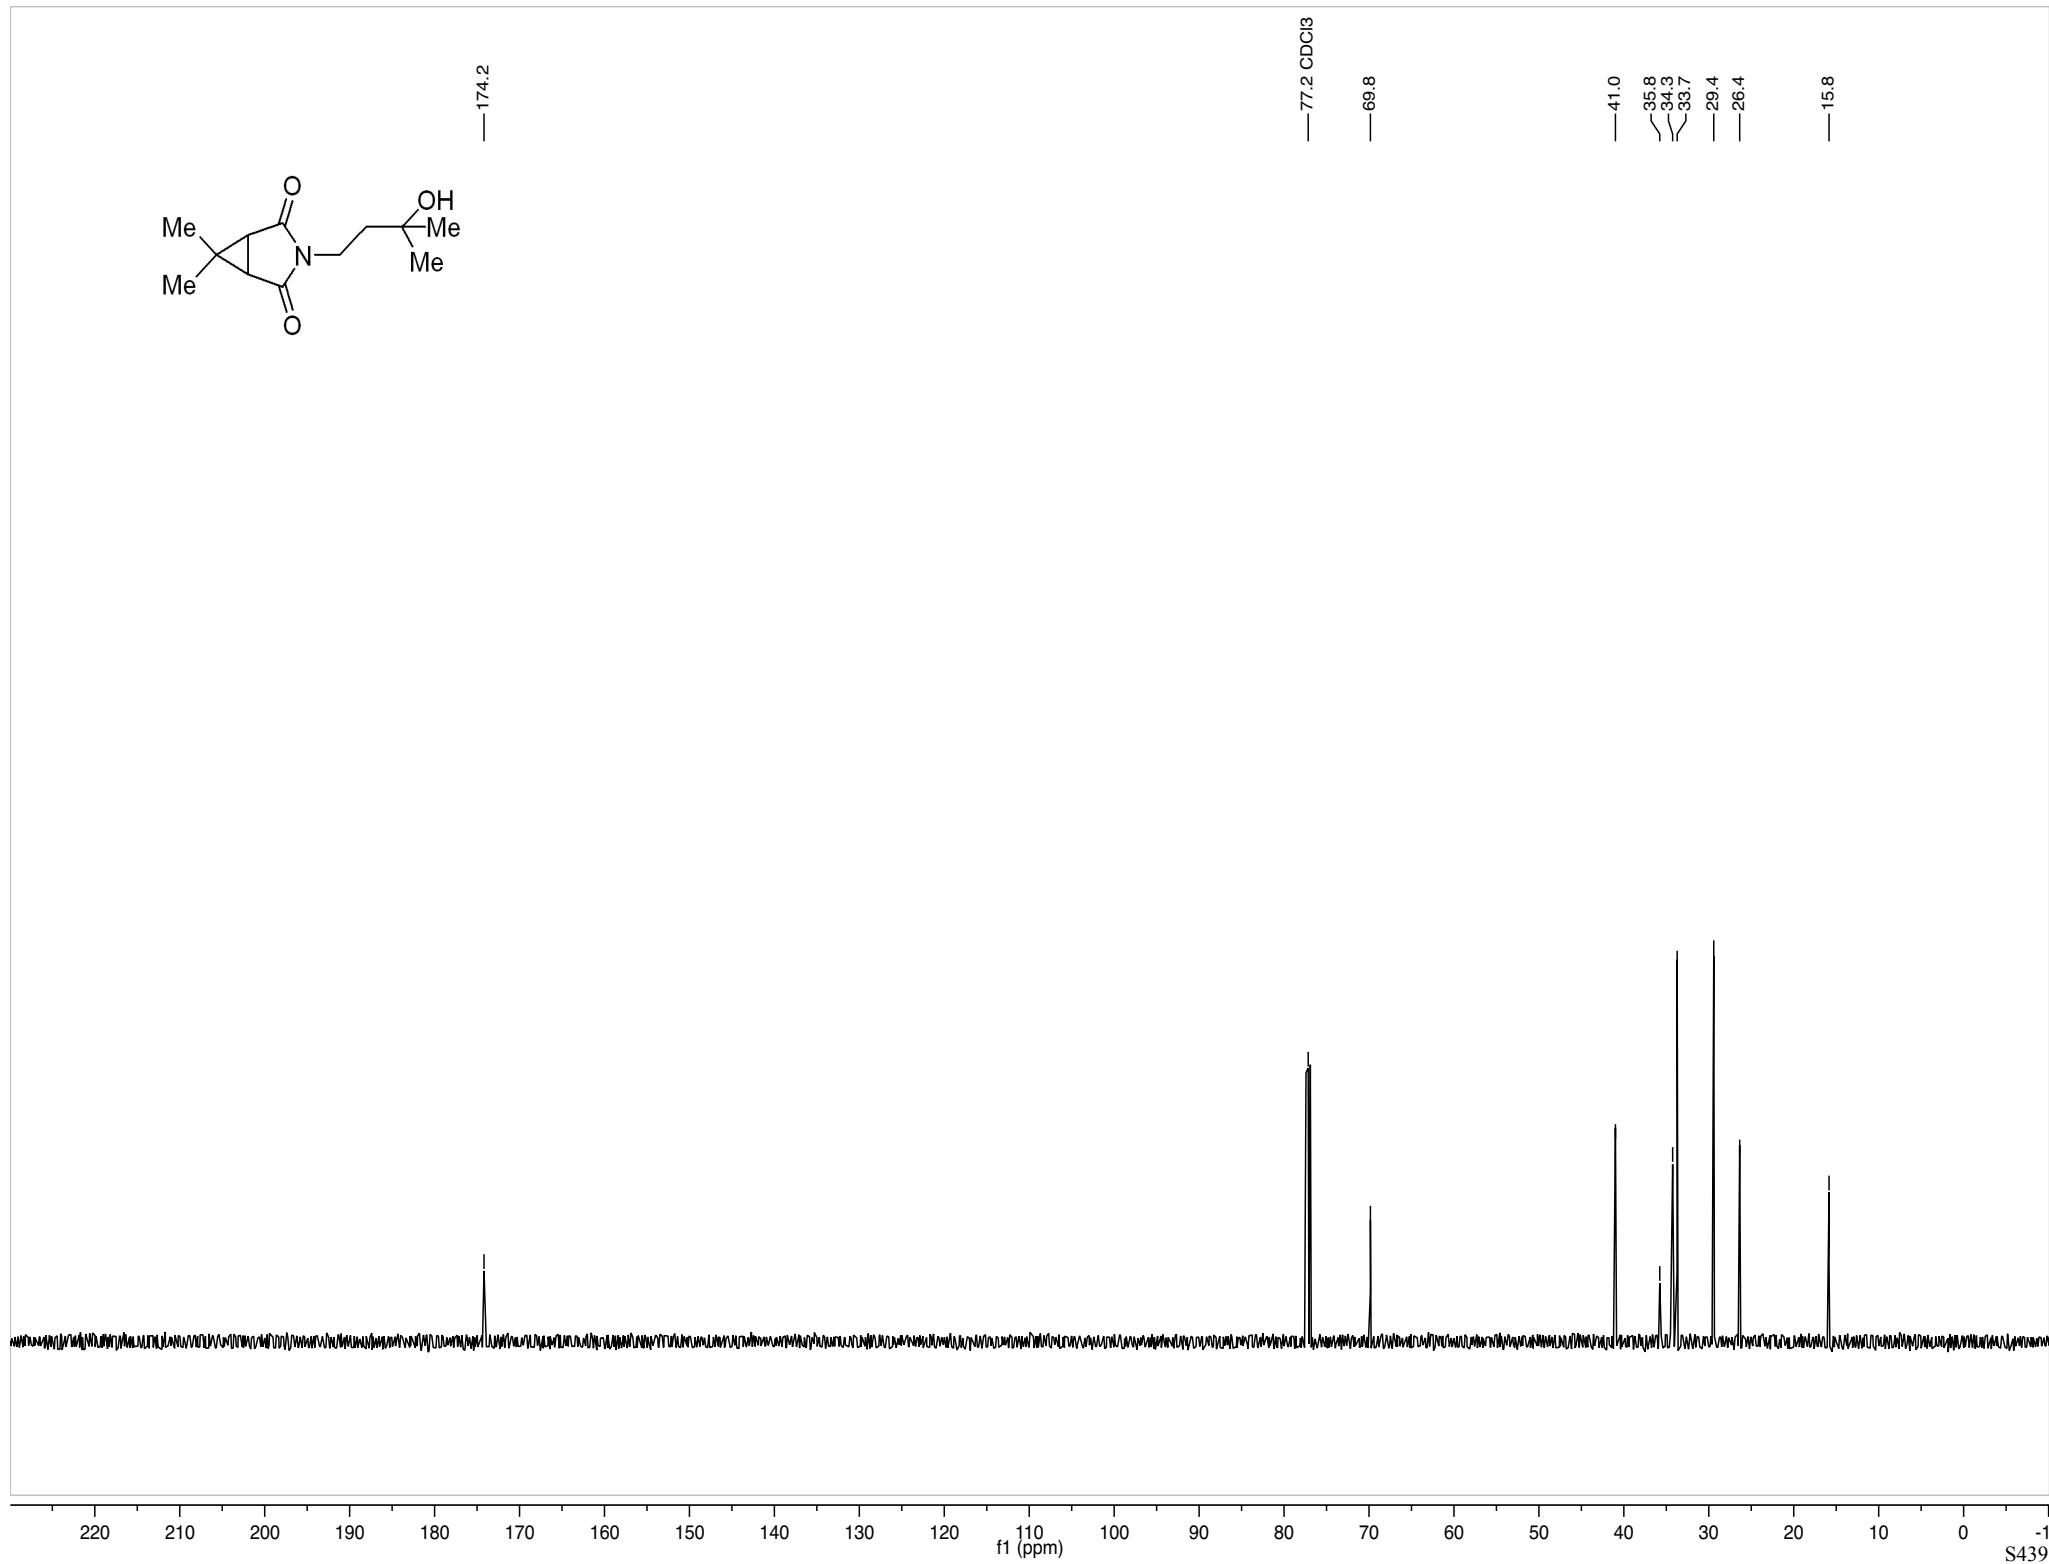



|    | Parameter              | Value          |
|----|------------------------|----------------|
| 1  | Origin                 | Varian         |
| 2  | Spectrometer           | inova          |
| 3  | Solvent                | CDCl3          |
| 4  | Temperature            | 20.0           |
| 5  | Pulse Sequence         | s2pul          |
| 6  | Experiment             | 1D             |
| 7  | Probe                  | QUAD           |
| 8  | Number of Scans        | 8              |
| 9  | Receiver Gain          | 36             |
| 10 | Relaxation Delay       | 0.0000         |
| 11 | Pulse Width            | 0.0000         |
| 12 | Acquisition Time       | 4.6645         |
| 13 | Spectrometer Frequency | 499.69         |
| 14 | Spectral Width         | 7024.9         |
| 15 | Lowest Frequency       | -1020.9        |
| 16 | Nucleus                | <sup>1</sup> H |
| 17 | Acquired Size          | 32768          |
| 18 | Spectral Size          | 65536          |

— 7.3 CDCl<sub>3</sub>

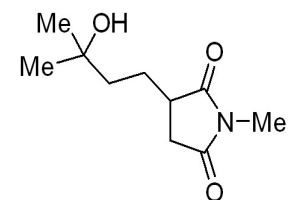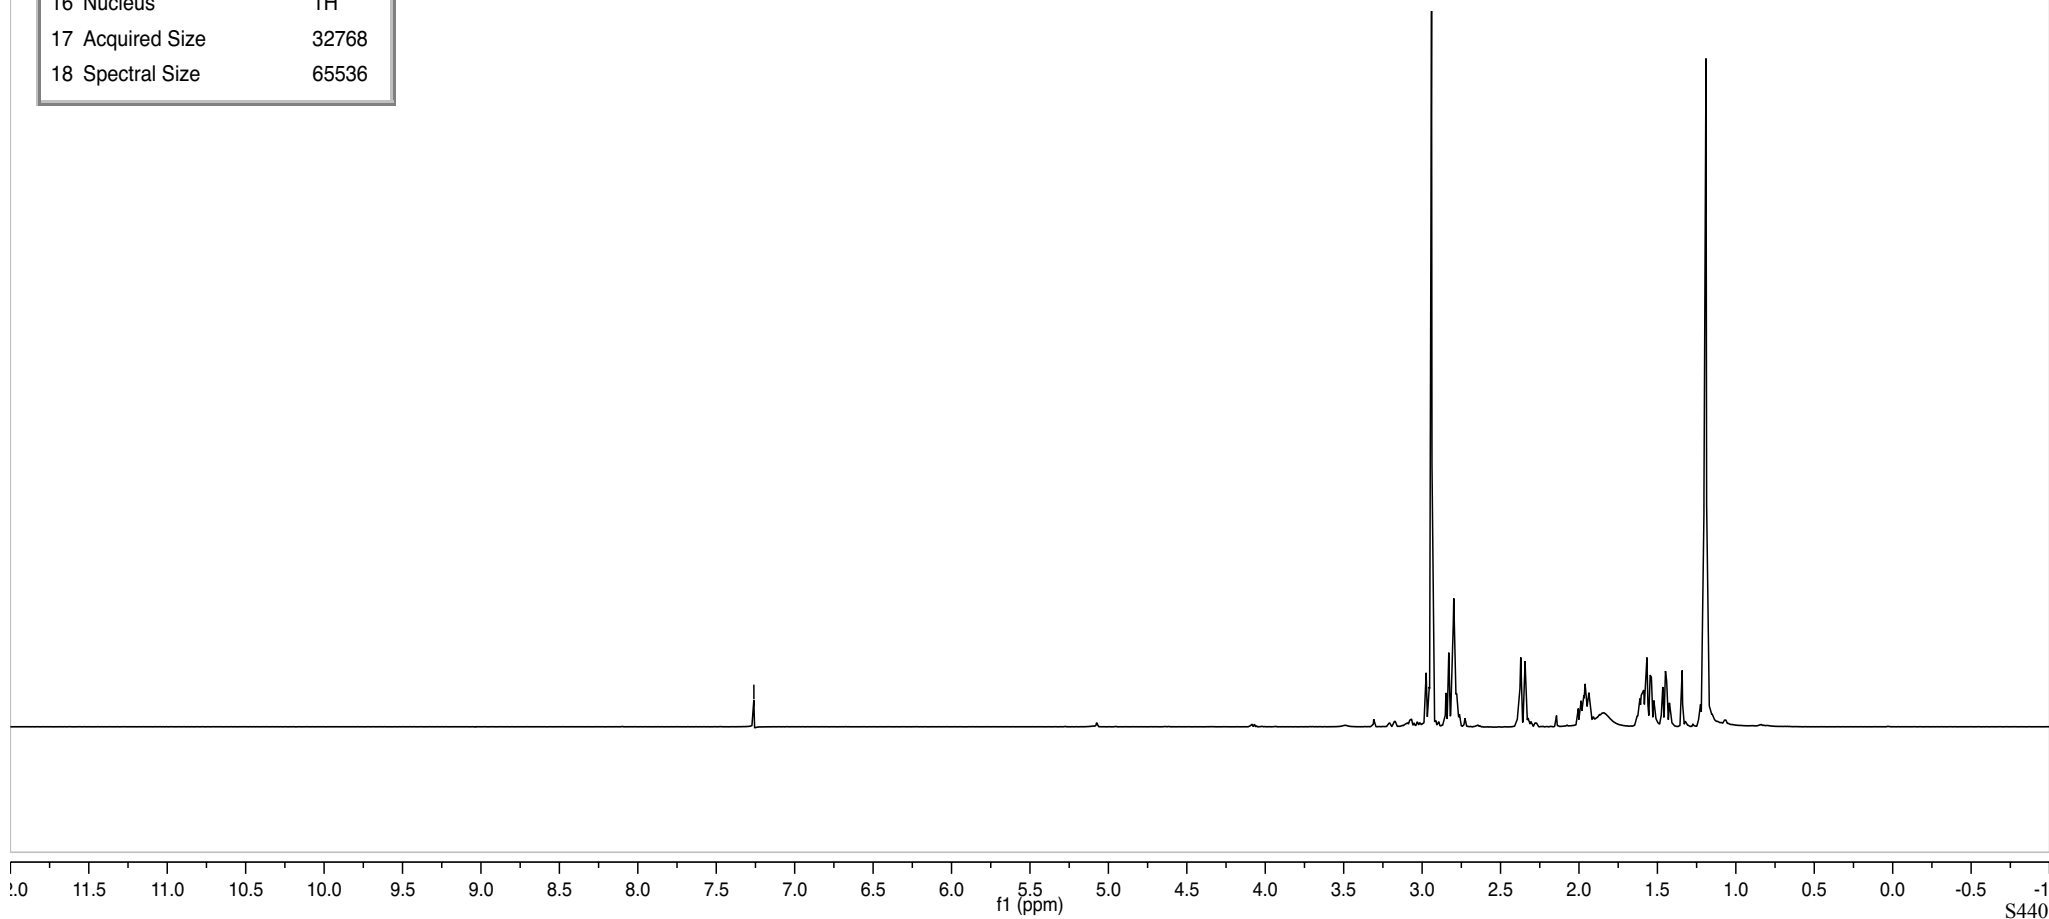

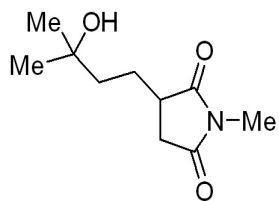

— 7.26 CDCl<sub>3</sub>

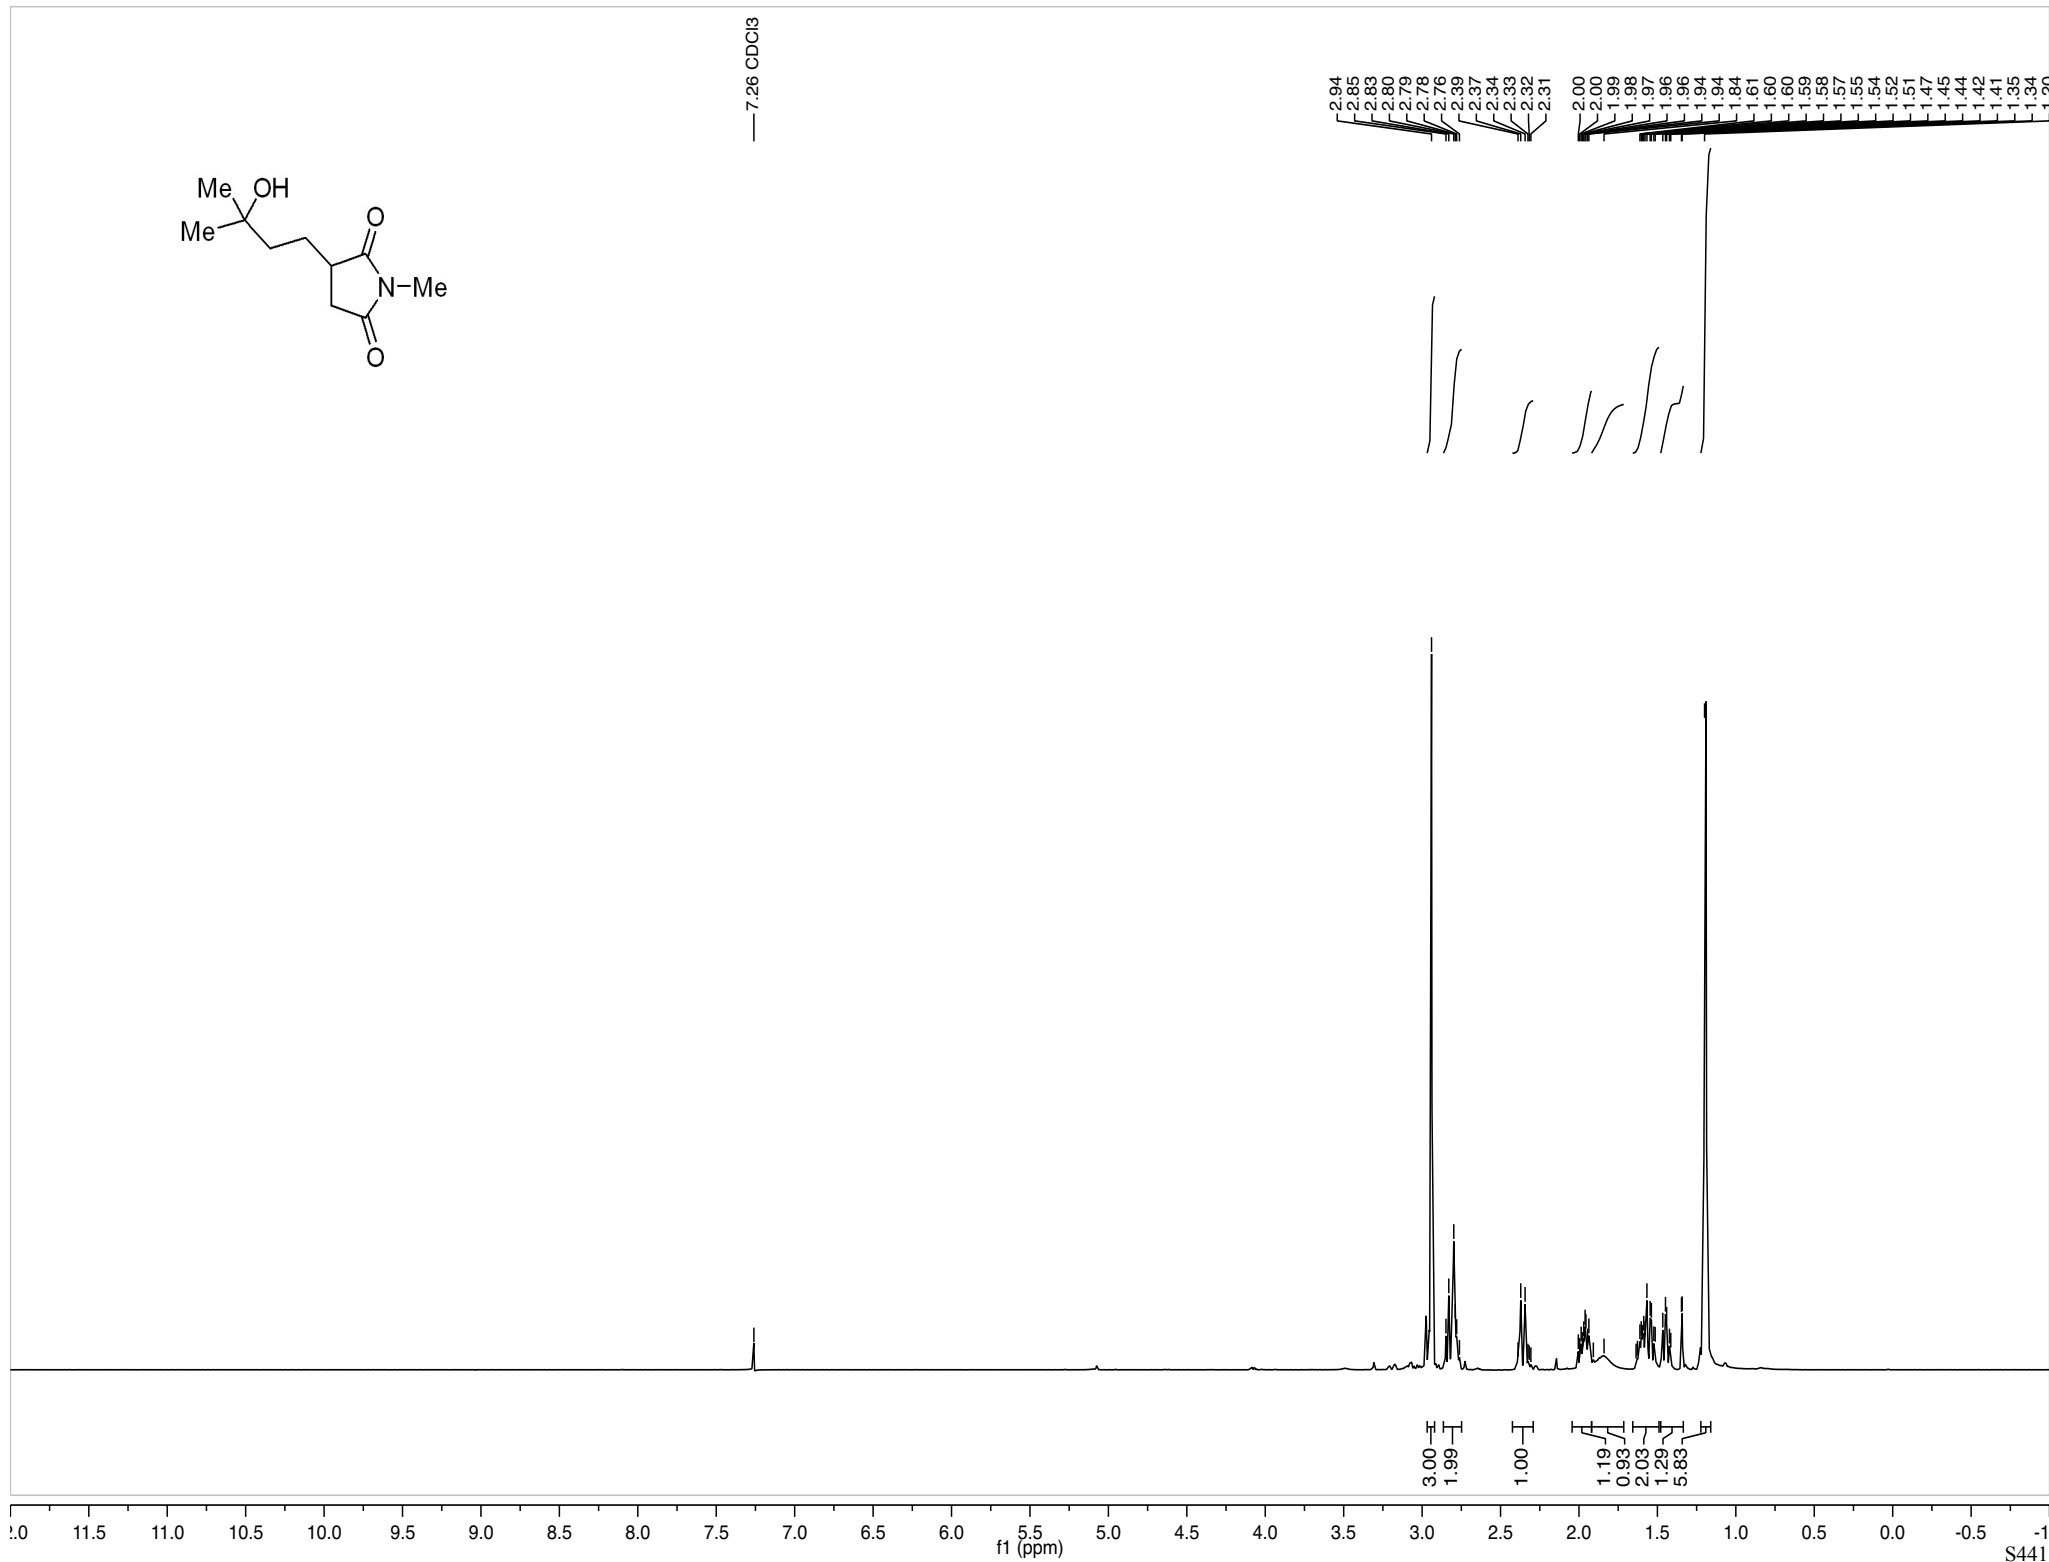

| Parameter                 | Value   |
|---------------------------|---------|
| 1 Origin                  | Varian  |
| 2 Spectrometer            | inova   |
| 3 Solvent                 | CDCl3   |
| 4 Temperature             | 20.0    |
| 5 Pulse Sequence          | s2pul   |
| 6 Experiment              | 1D      |
| 7 Probe                   | QUAD    |
| 8 Number of Scans         | 112     |
| 9 Receiver Gain           | 60      |
| 10 Relaxation Delay       | 1.0000  |
| 11 Pulse Width            | 0.0000  |
| 12 Acquisition Time       | 1.0863  |
| 13 Spectrometer Frequency | 125.66  |
| 14 Spectral Width         | 30165.9 |
| 15 Lowest Frequency       | -1276.6 |
| 16 Nucleus                | 13C     |
| 17 Acquired Size          | 32768   |
| 18 Spectral Size          | 65536   |

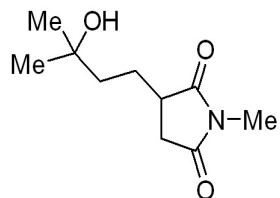

— 77.2 CDCl3

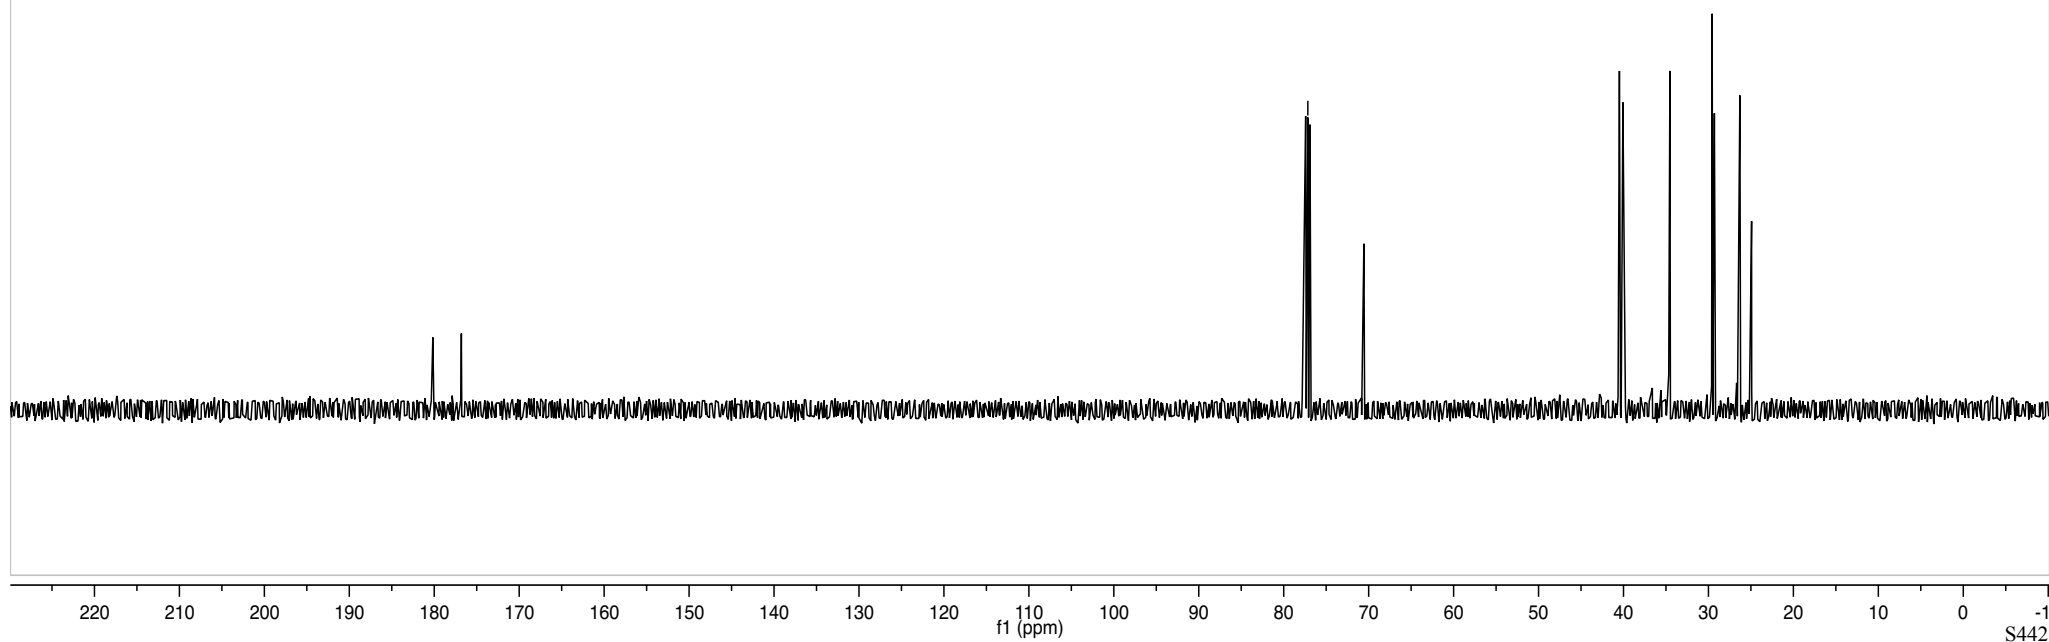

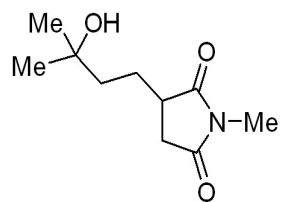

— 180.2  
— 176.8

— 77.2 CDCl<sub>3</sub>

— 70.6

— 40.5  
— 40.1

— 34.5

— 29.6  
— 29.3

— 26.3  
— 24.9

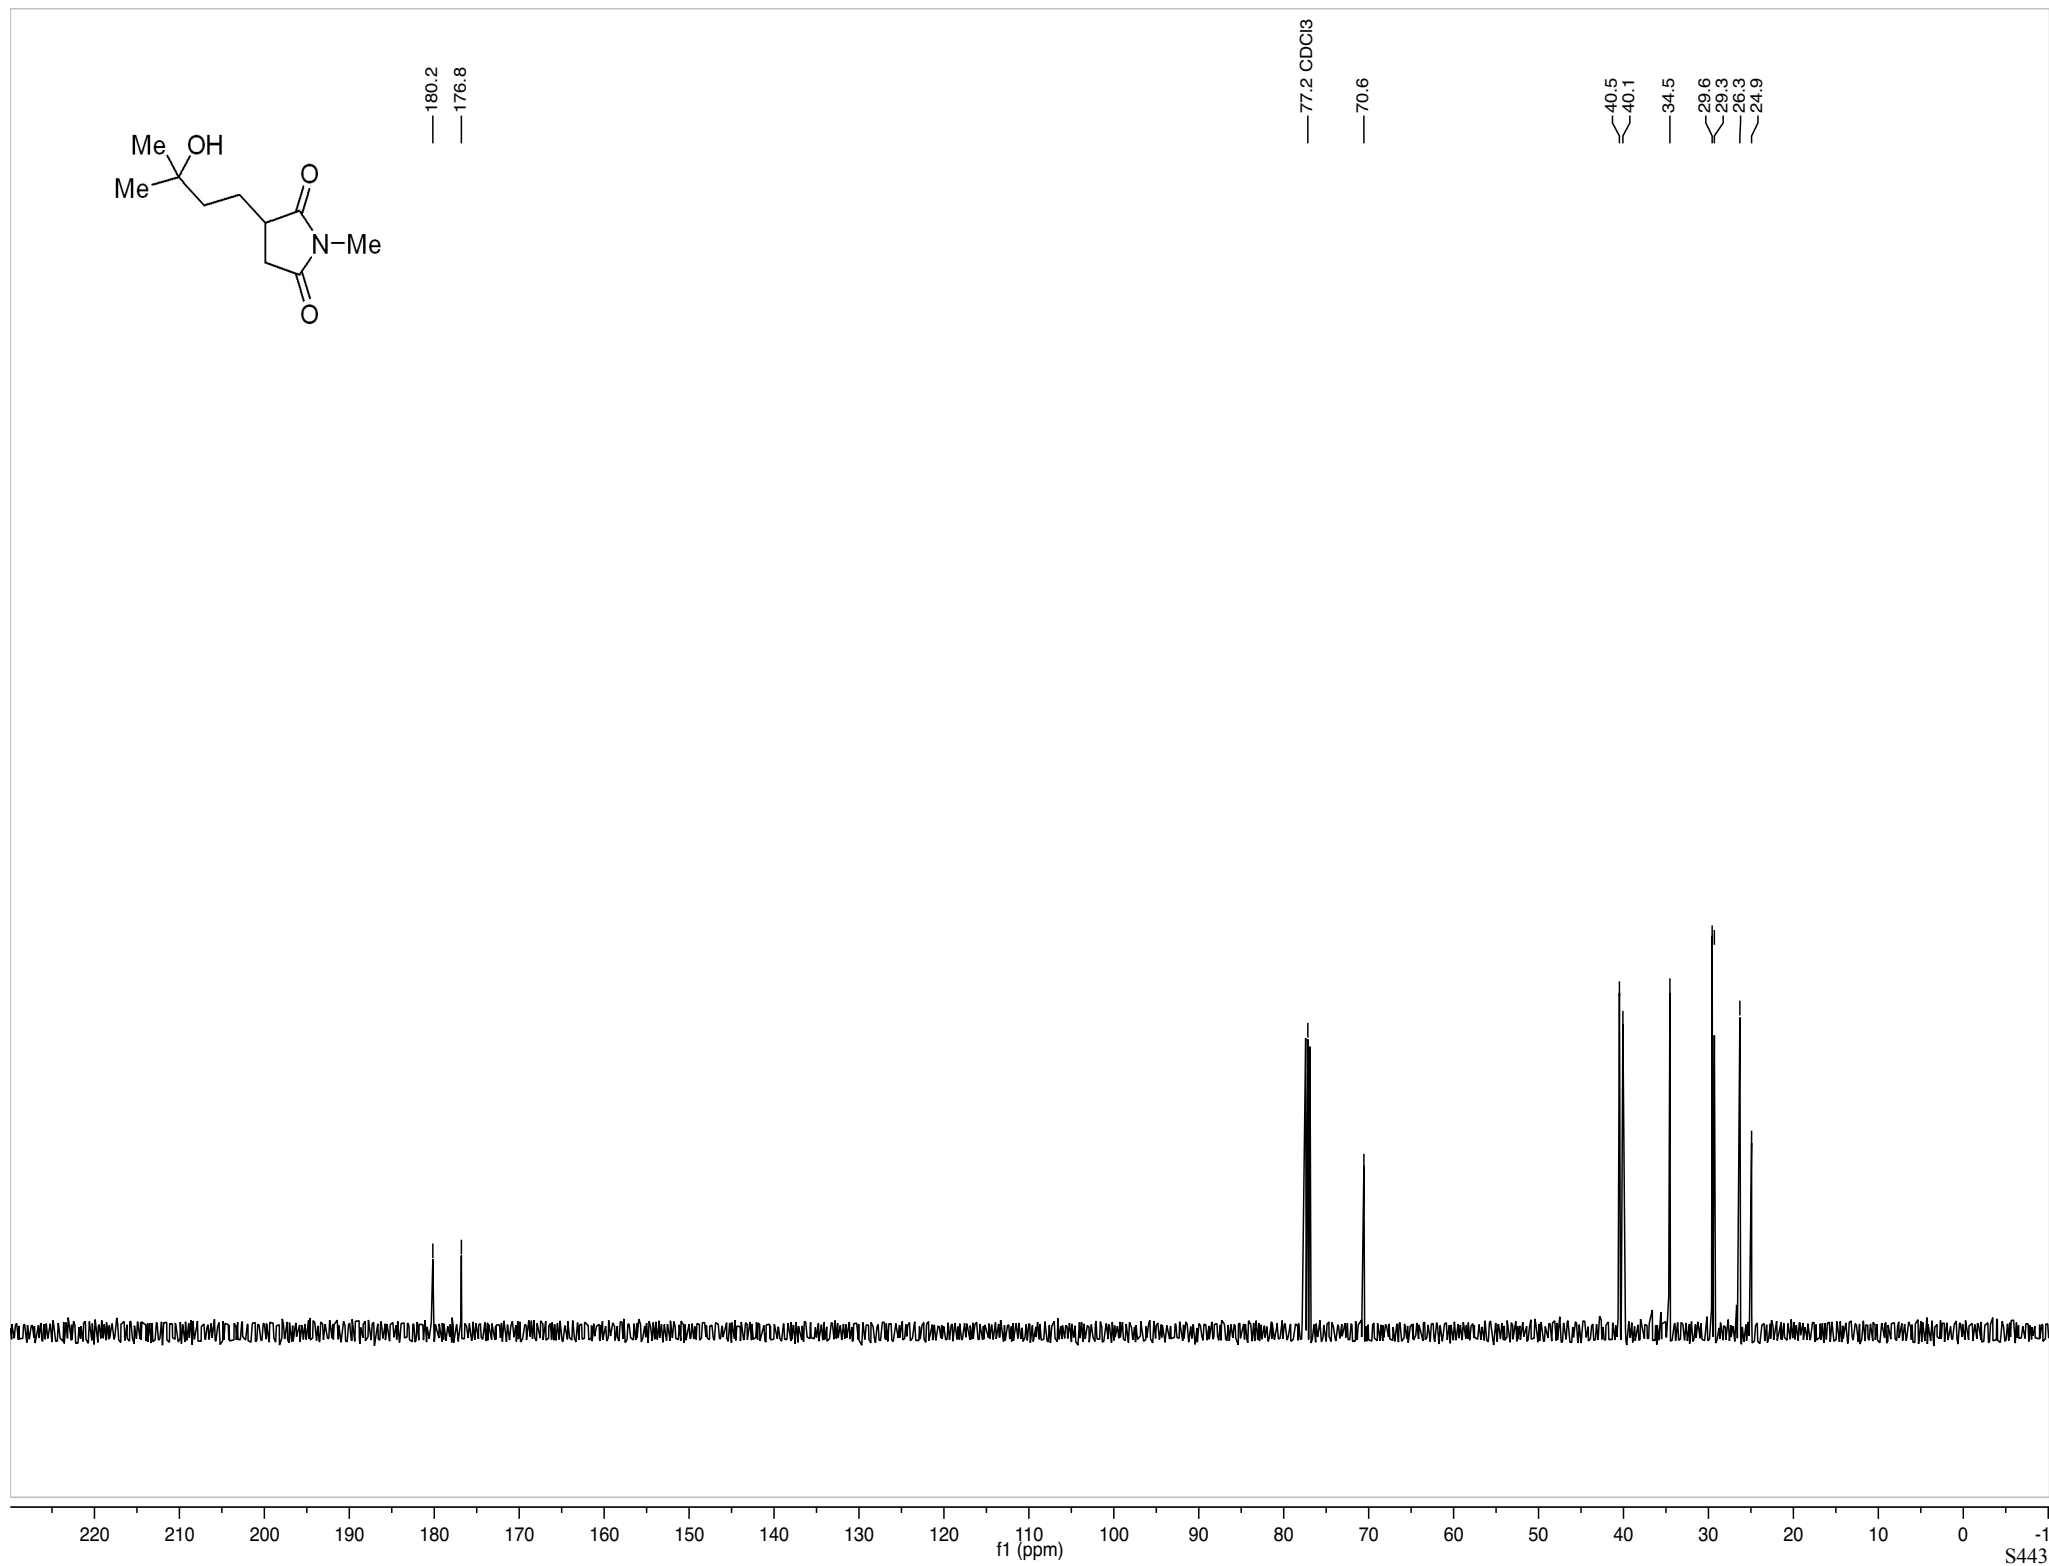

| Parameter                 | Value          |
|---------------------------|----------------|
| 1 Origin                  | Varian         |
| 2 Spectrometer            | inova          |
| 3 Solvent                 | CD3CN          |
| 4 Temperature             | 29.0           |
| 5 Pulse Sequence          | s2pul          |
| 6 Experiment              | 1D             |
| 7 Probe                   | QUAD           |
| 8 Number of Scans         | 8              |
| 9 Receiver Gain           | 41             |
| 10 Relaxation Delay       | 0.0000         |
| 11 Pulse Width            | 0.0000         |
| 12 Acquisition Time       | 4.6645         |
| 13 Spectrometer Frequency | 499.70         |
| 14 Spectral Width         | 7024.9         |
| 15 Lowest Frequency       | -1023.9        |
| 16 Nucleus                | <sup>1</sup> H |
| 17 Acquired Size          | 32768          |
| 18 Spectral Size          | 65536          |

— 1.94 CD3CN

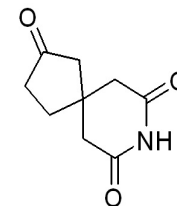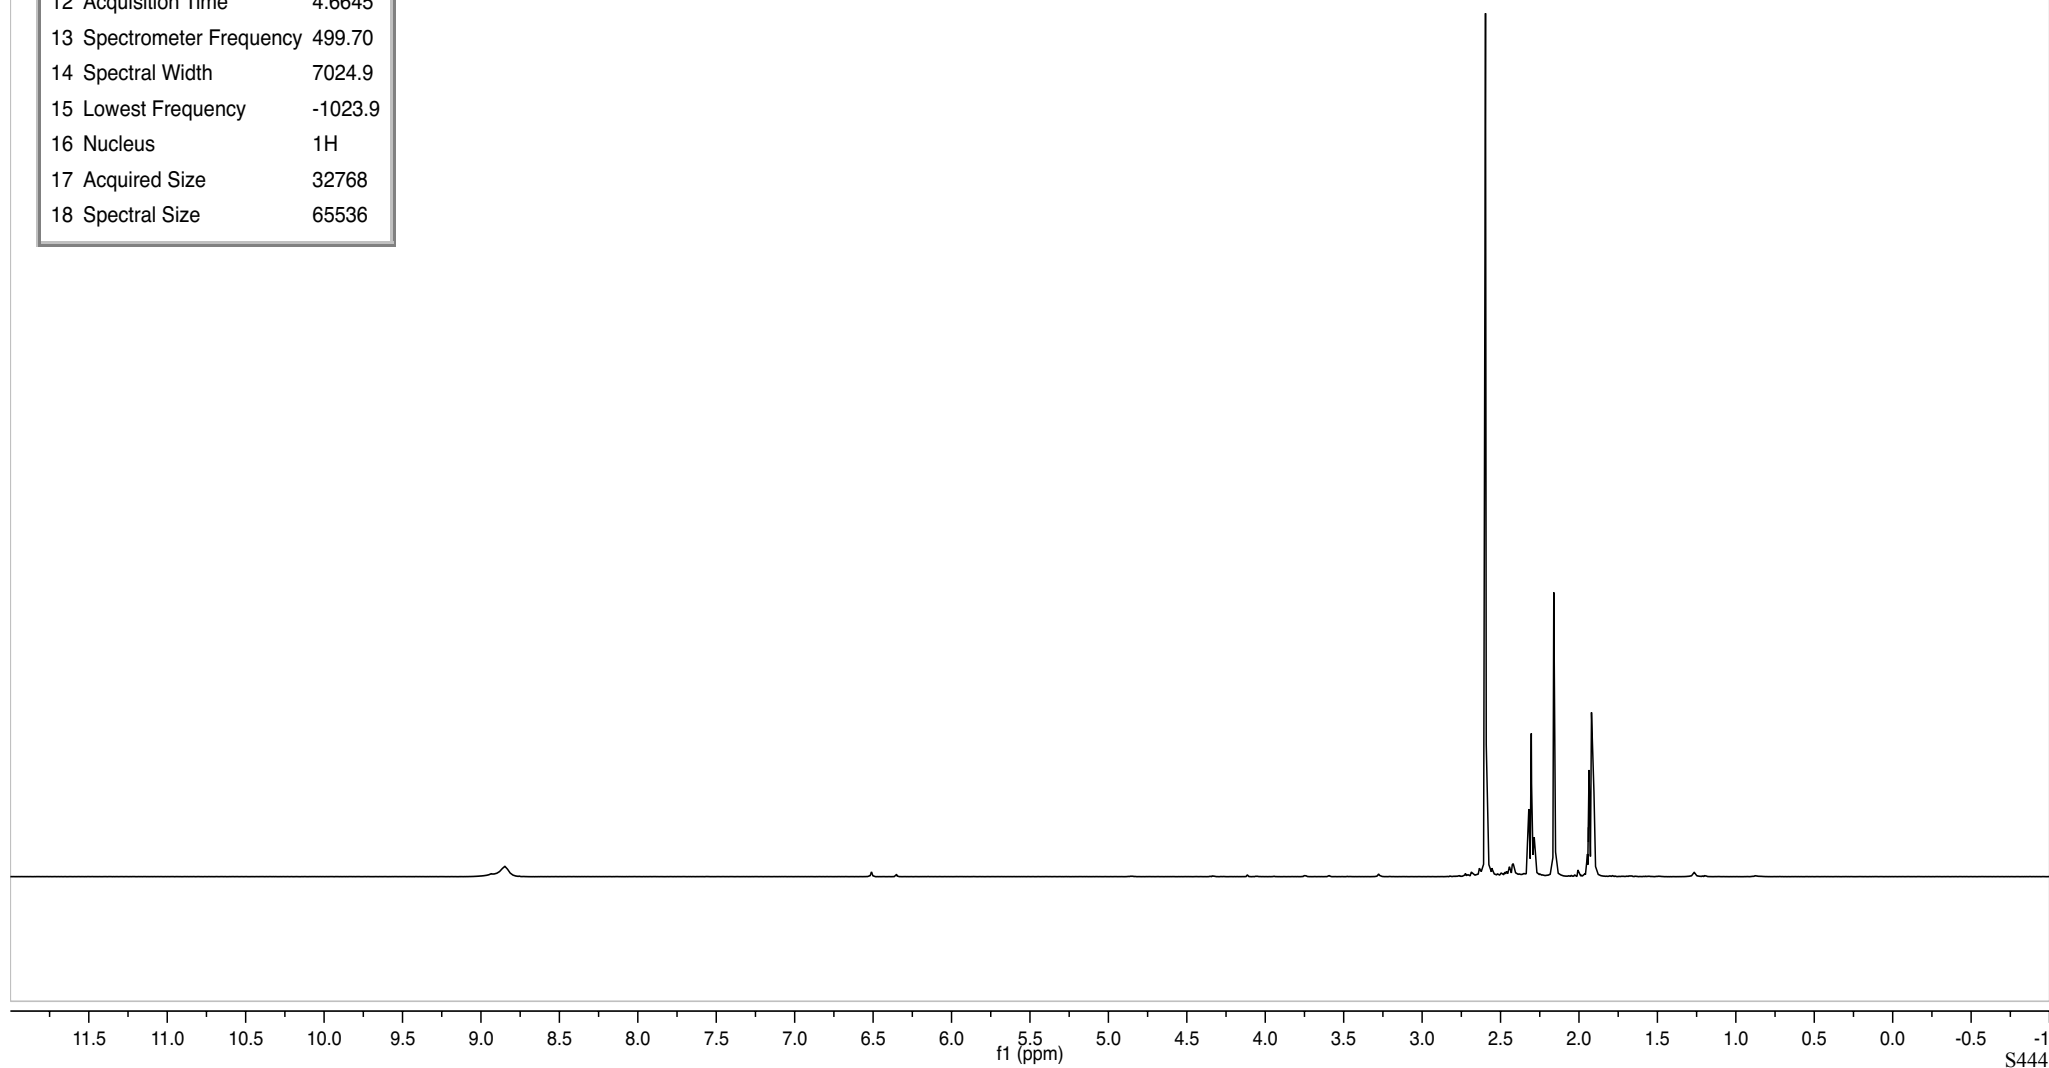

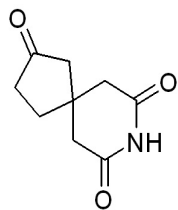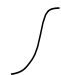

0.91

2.60  
2.32  
2.30  
2.29  
2.16  
1.94 CD3CN  
1.94  
1.92  
1.90

4.20  
2.12  
2.00  
2.34

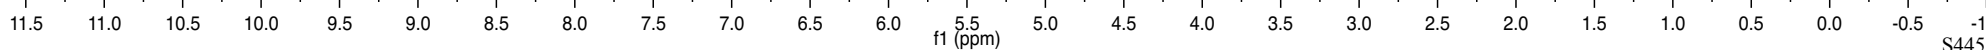

| Parameter                 | Value           |
|---------------------------|-----------------|
| 1 Origin                  | Varian          |
| 2 Spectrometer            | inova           |
| 3 Solvent                 | CD3CN           |
| 4 Temperature             | 22.0            |
| 5 Pulse Sequence          | s2pul           |
| 6 Experiment              | 1D              |
| 7 Probe                   | QUAD            |
| 8 Number of Scans         | 240             |
| 9 Receiver Gain           | 60              |
| 10 Relaxation Delay       | 1.0000          |
| 11 Pulse Width            | 0.0000          |
| 12 Acquisition Time       | 1.0863          |
| 13 Spectrometer Frequency | 125.66          |
| 14 Spectral Width         | 30165.9         |
| 15 Lowest Frequency       | -1260.2         |
| 16 Nucleus                | <sup>13</sup> C |
| 17 Acquired Size          | 32768           |
| 18 Spectral Size          | 65536           |

— 118.3 CD3CN

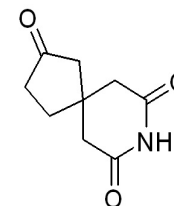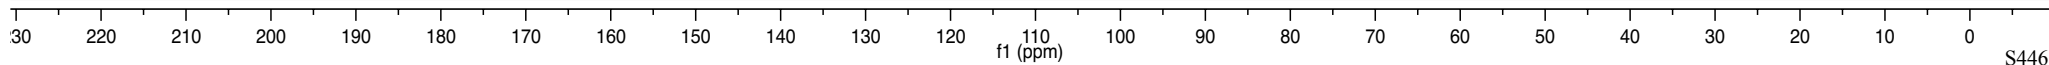

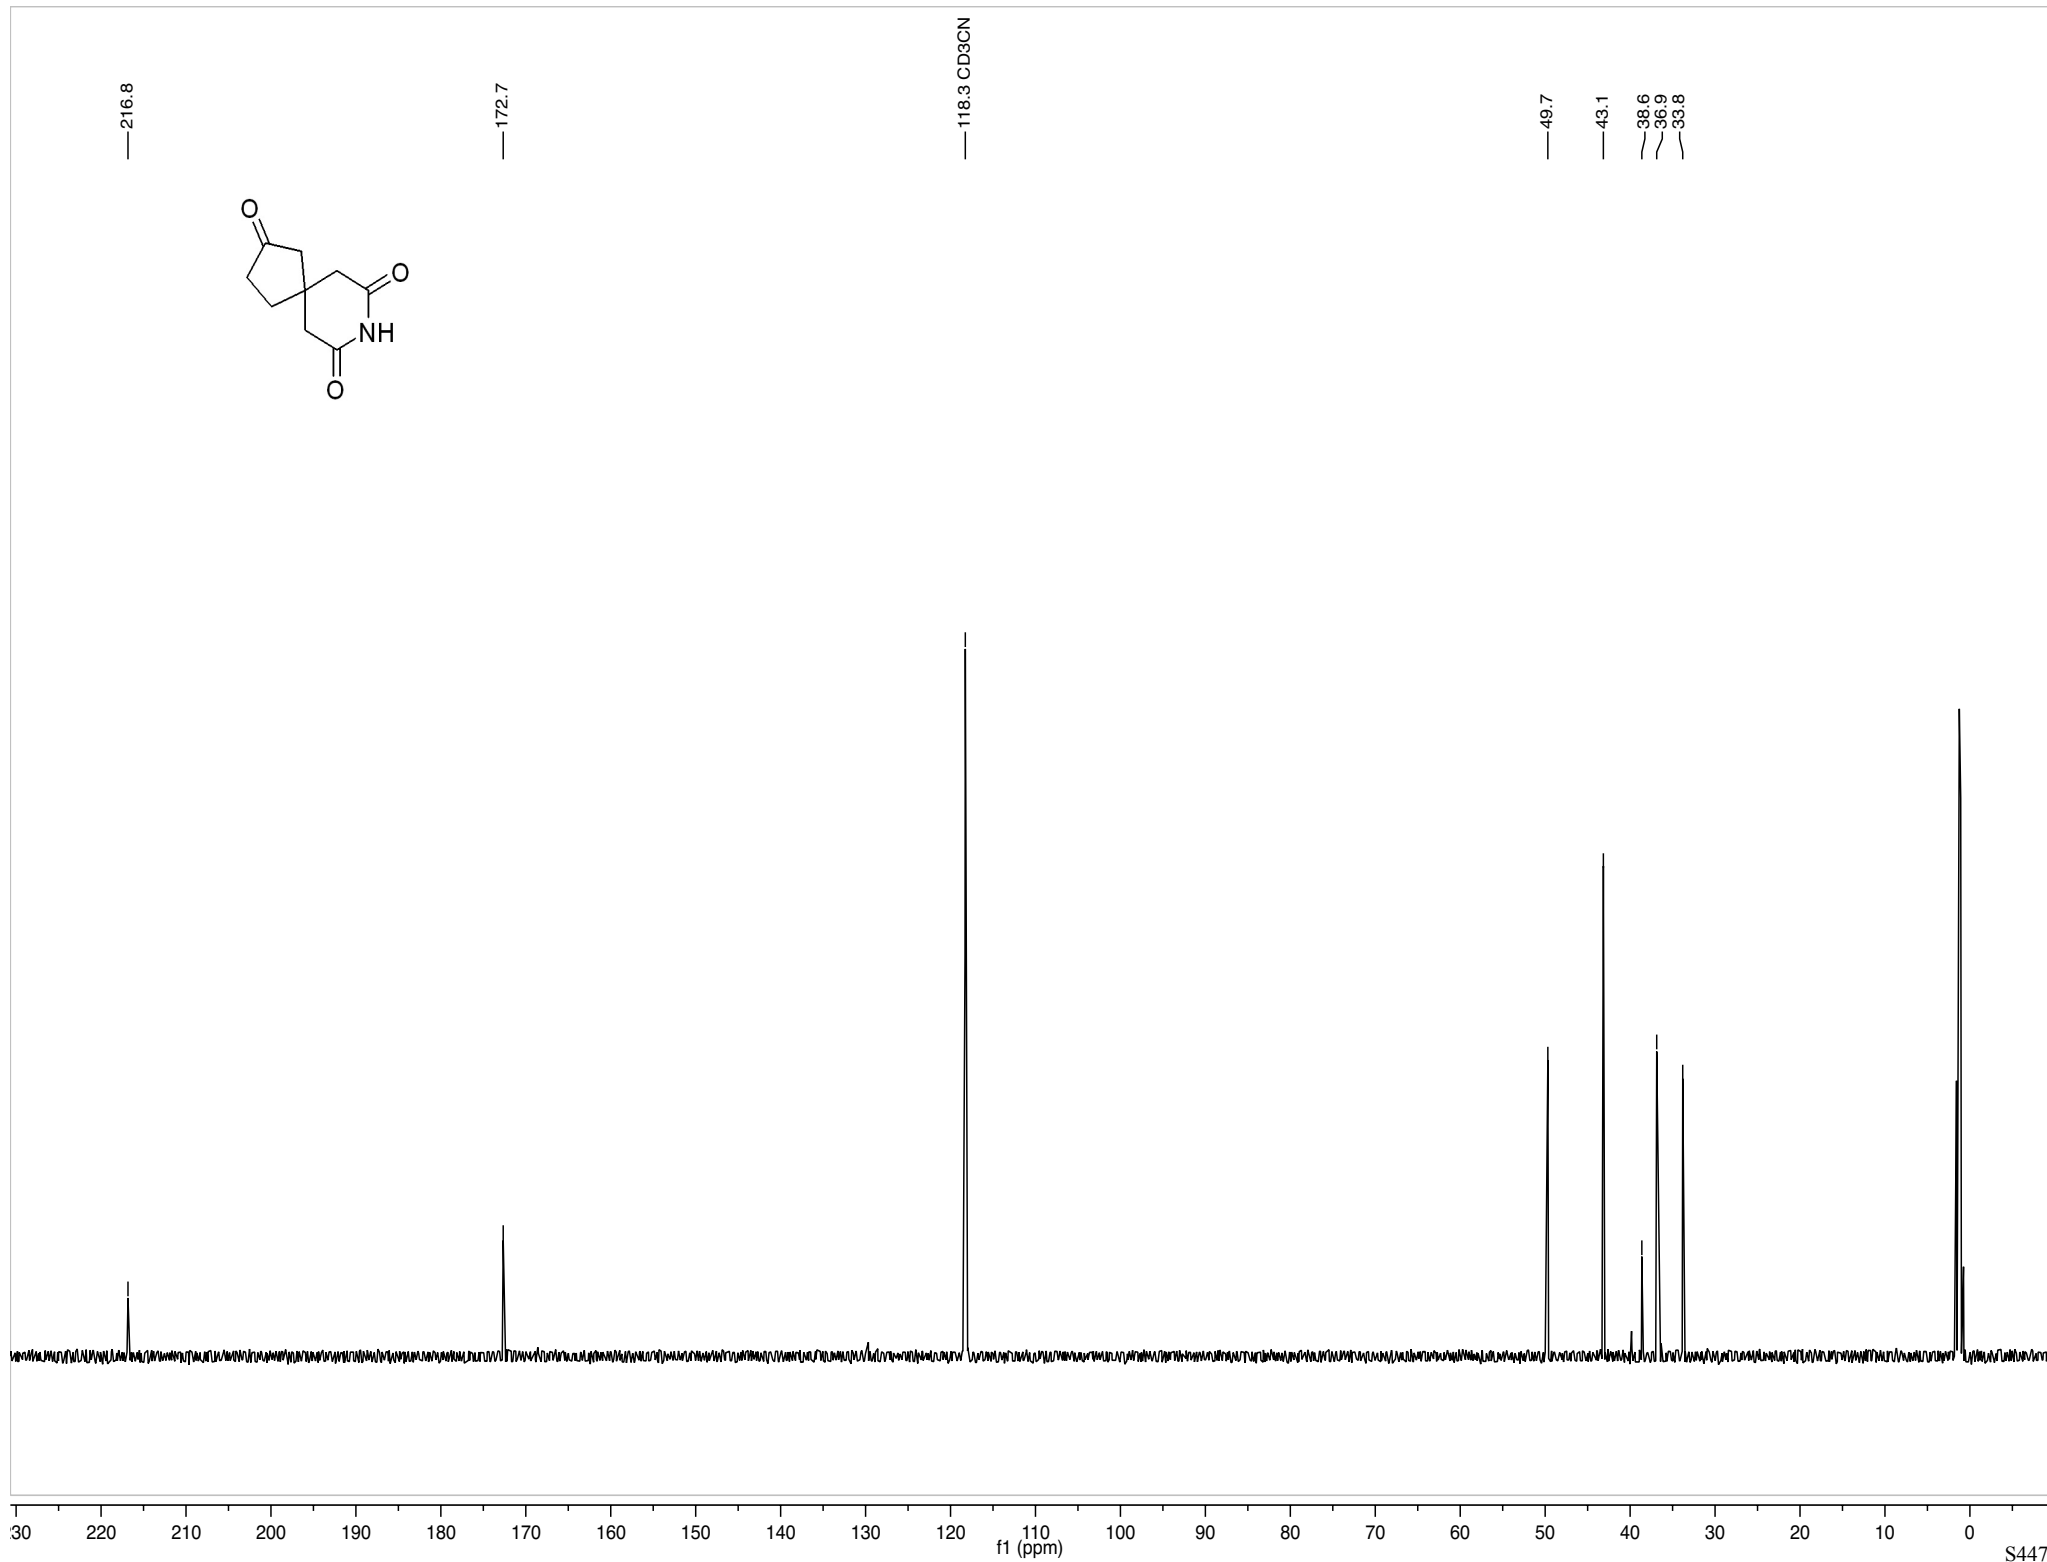



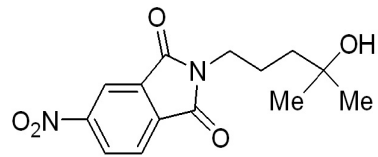

— 7.26 CDCl<sub>3</sub>

| Parameter                 | Value             |
|---------------------------|-------------------|
| 1 Origin                  | Varian            |
| 2 Spectrometer            | inova             |
| 3 Solvent                 | CDCl <sub>3</sub> |
| 4 Temperature             | 40.0              |
| 5 Pulse Sequence          | s2pul             |
| 6 Experiment              | 1D                |
| 7 Probe                   | QUAD              |
| 8 Number of Scans         | 8                 |
| 9 Receiver Gain           | 41                |
| 10 Relaxation Delay       | 0.0000            |
| 11 Pulse Width            | 0.0000            |
| 12 Acquisition Time       | 4.6645            |
| 13 Spectrometer Frequency | 499.69            |
| 14 Spectral Width         | 7024.9            |
| 15 Lowest Frequency       | -1011.4           |
| 16 Nucleus                | <sup>1</sup> H    |
| 17 Acquired Size          | 32768             |
| 18 Spectral Size          | 65536             |

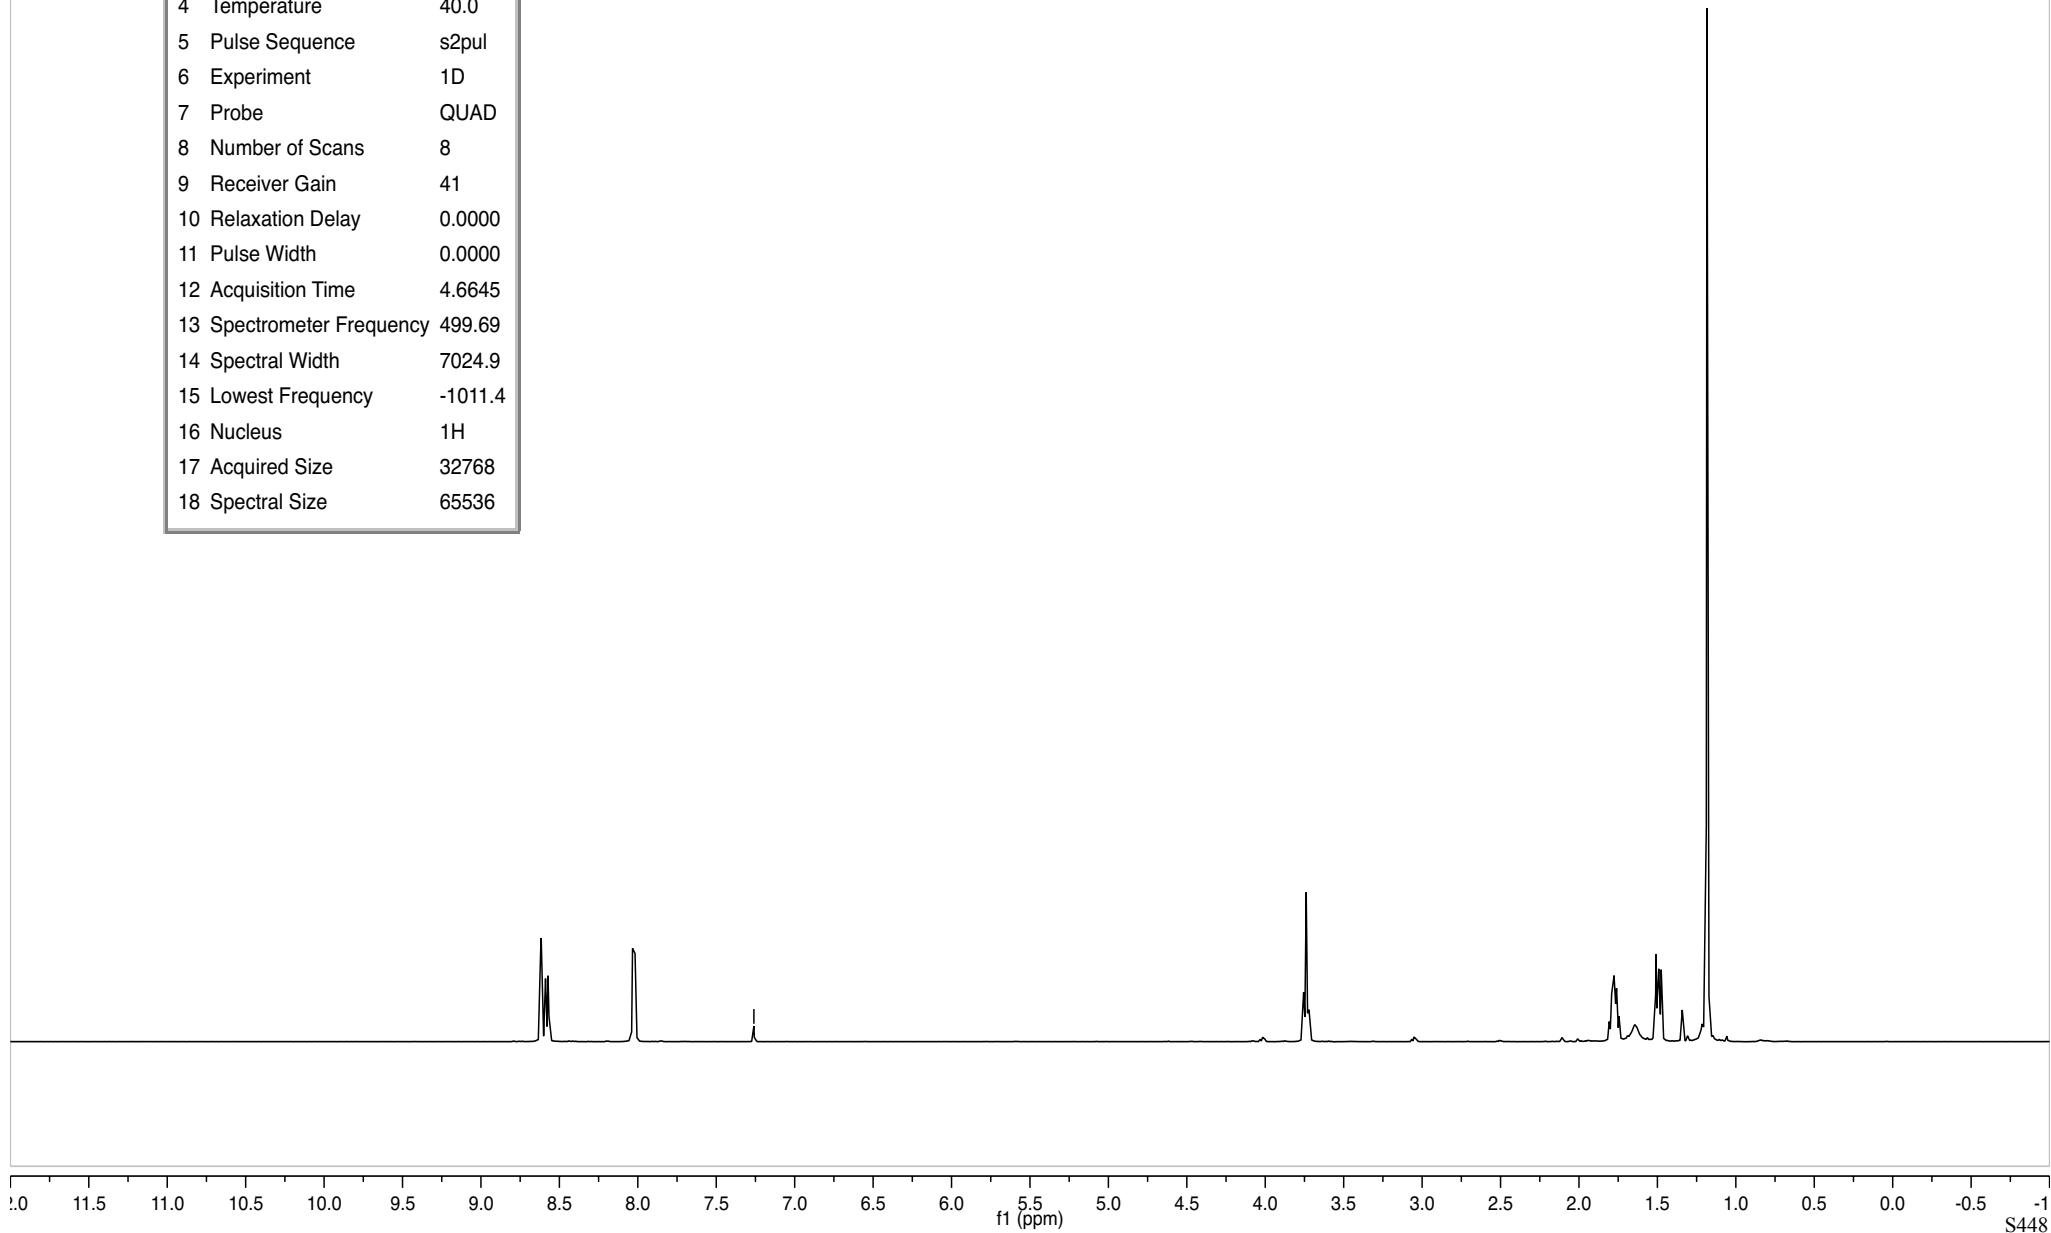

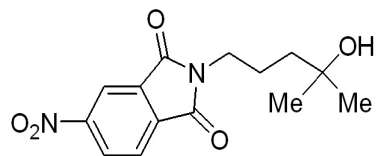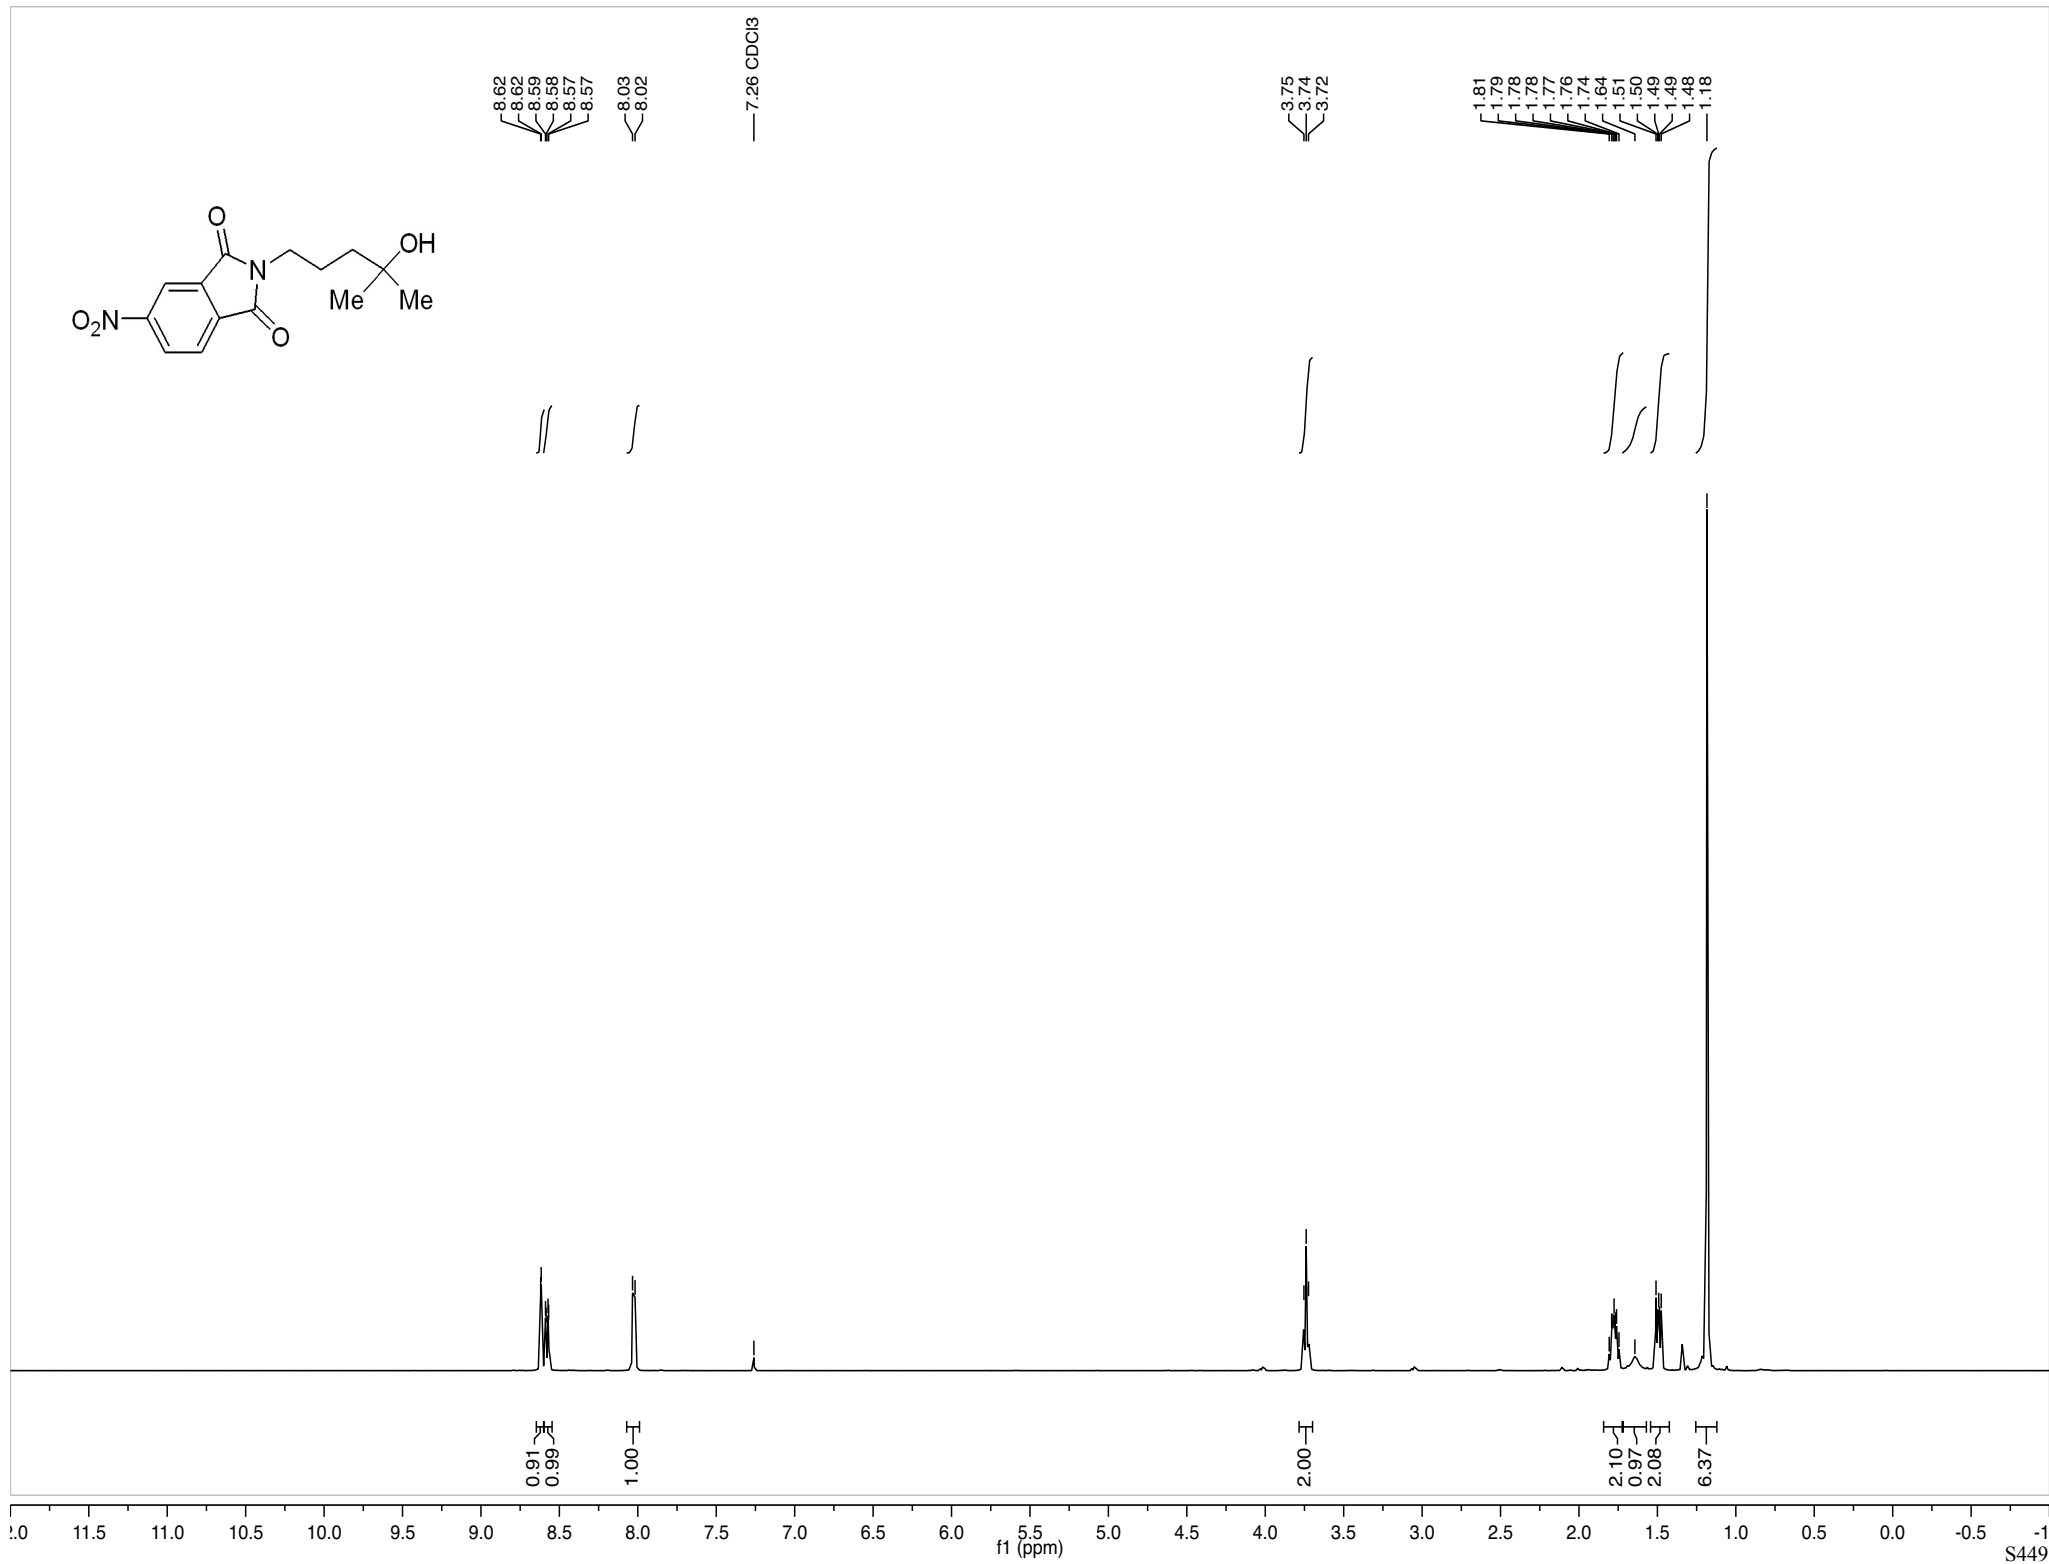

|    | Parameter              | Value           |
|----|------------------------|-----------------|
| 1  | Origin                 | Varian          |
| 2  | Spectrometer           | inova           |
| 3  | Solvent                | CDCl3           |
| 4  | Temperature            | 40.0            |
| 5  | Pulse Sequence         | s2pul           |
| 6  | Experiment             | 1D              |
| 7  | Probe                  | QUAD            |
| 8  | Number of Scans        | 64              |
| 9  | Receiver Gain          | 60              |
| 10 | Relaxation Delay       | 1.0000          |
| 11 | Pulse Width            | 0.0000          |
| 12 | Acquisition Time       | 1.0863          |
| 13 | Spectrometer Frequency | 125.66          |
| 14 | Spectral Width         | 30165.9         |
| 15 | Lowest Frequency       | -1260.2         |
| 16 | Nucleus                | <sup>13</sup> C |
| 17 | Acquired Size          | 32768           |
| 18 | Spectral Size          | 65536           |

— 77.16 CDCl<sub>3</sub>

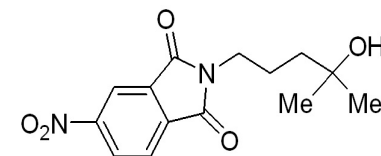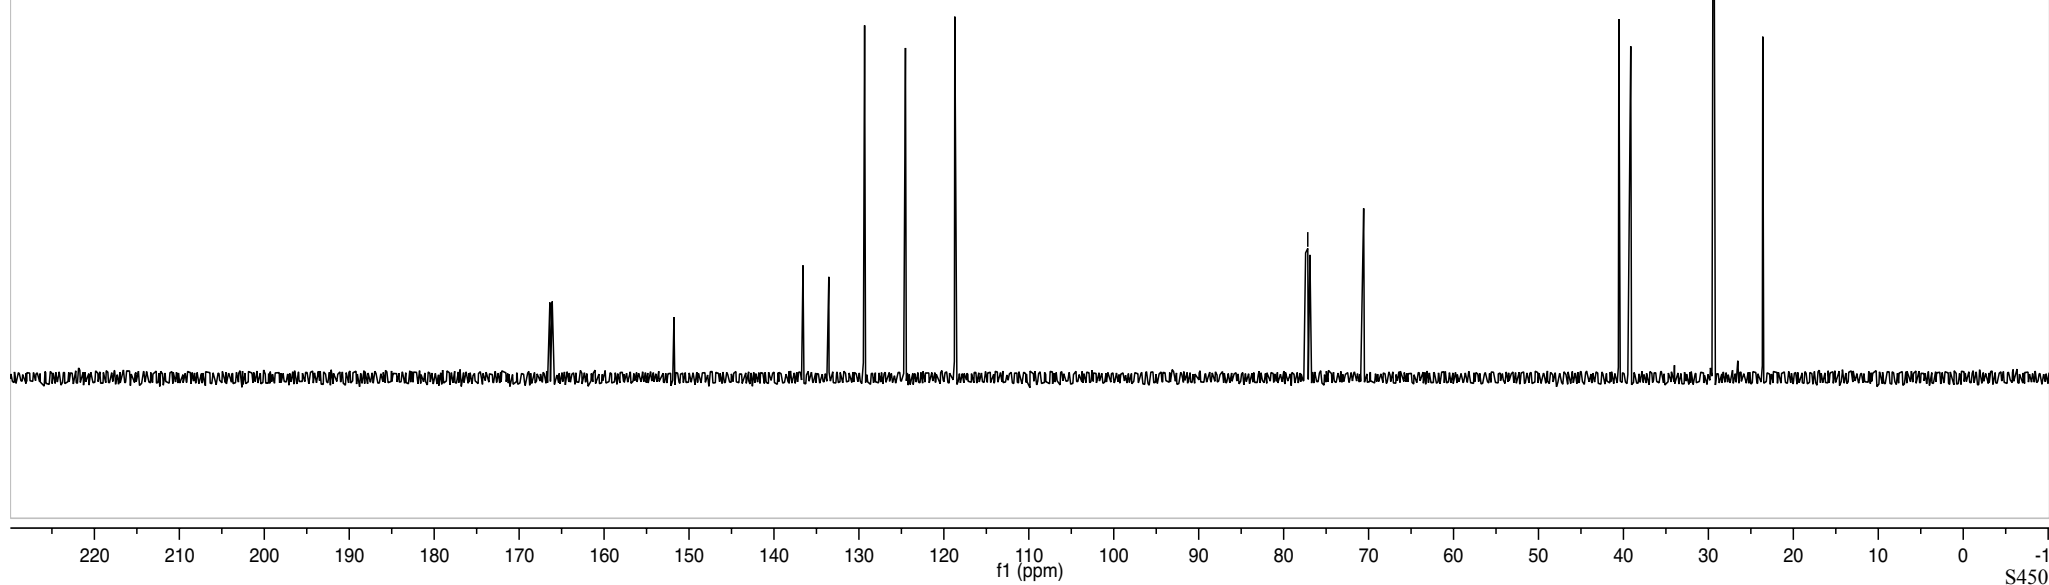

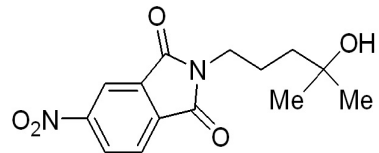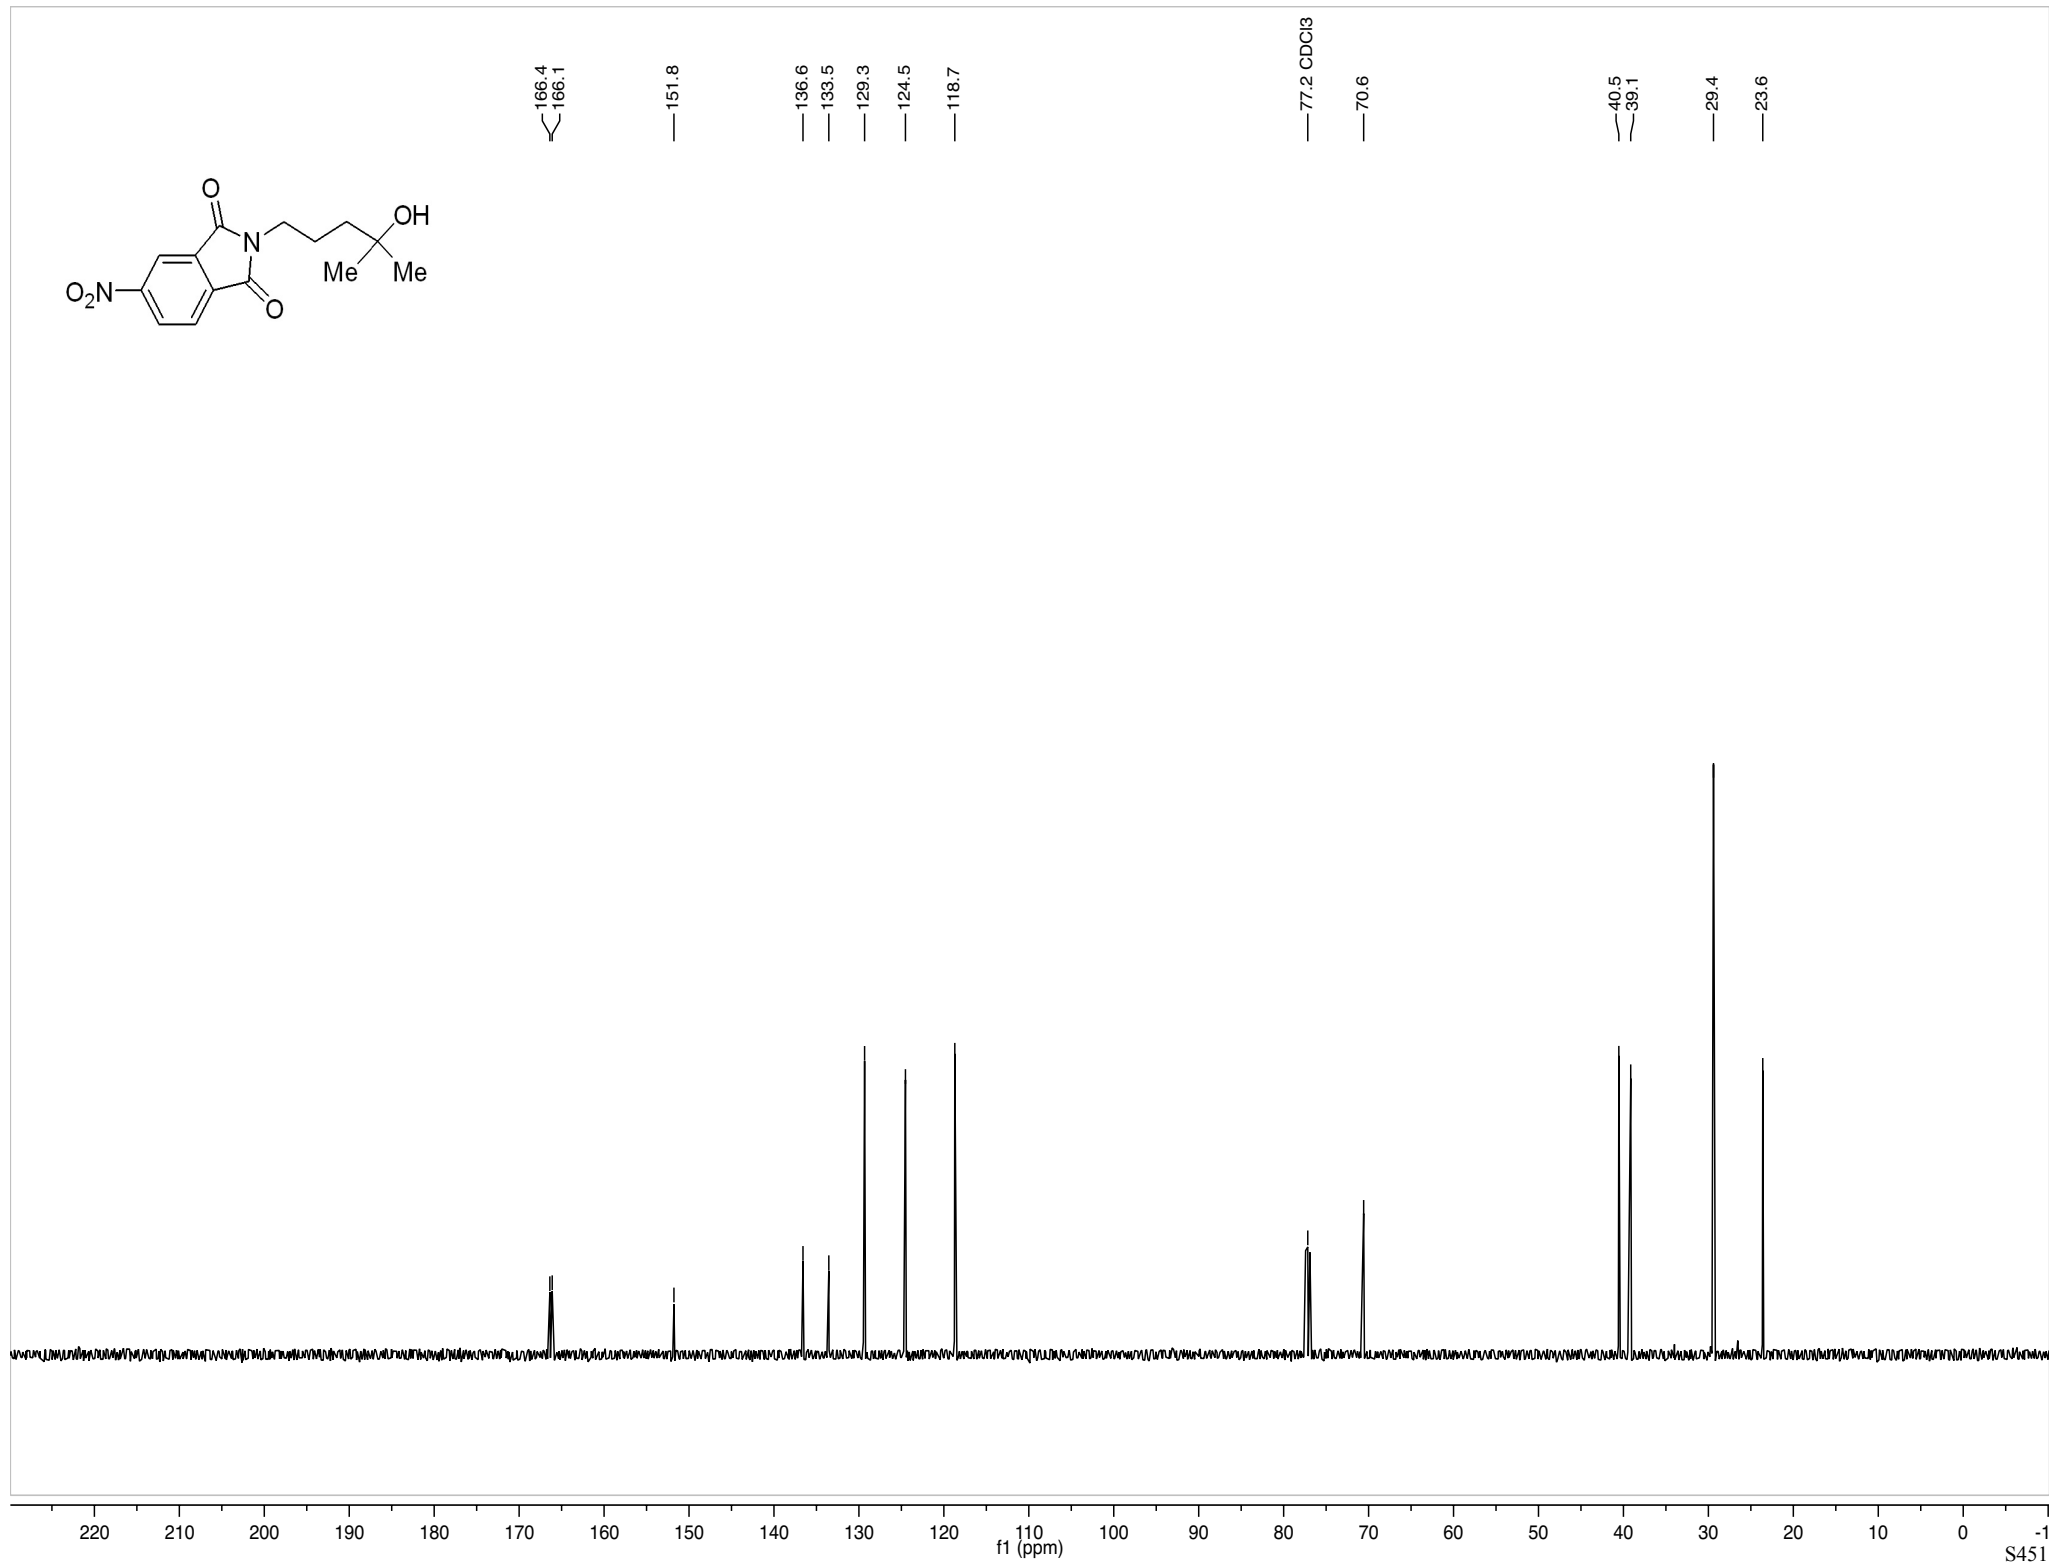

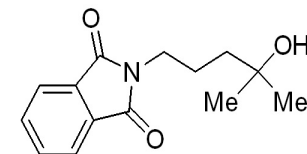

— 7.26 CDCl<sub>3</sub>

| Parameter                 | Value             |
|---------------------------|-------------------|
| 1 Origin                  | Varian            |
| 2 Spectrometer            | inova             |
| 3 Solvent                 | CDCl <sub>3</sub> |
| 4 Temperature             | 40.0              |
| 5 Pulse Sequence          | s2pul             |
| 6 Experiment              | 1D                |
| 7 Probe                   | QUAD              |
| 8 Number of Scans         | 8                 |
| 9 Receiver Gain           | 41                |
| 10 Relaxation Delay       | 0.0000            |
| 11 Pulse Width            | 0.0000            |
| 12 Acquisition Time       | 4.6645            |
| 13 Spectrometer Frequency | 499.69            |
| 14 Spectral Width         | 7024.9            |
| 15 Lowest Frequency       | -1011.4           |
| 16 Nucleus                | <sup>1</sup> H    |
| 17 Acquired Size          | 32768             |
| 18 Spectral Size          | 65536             |

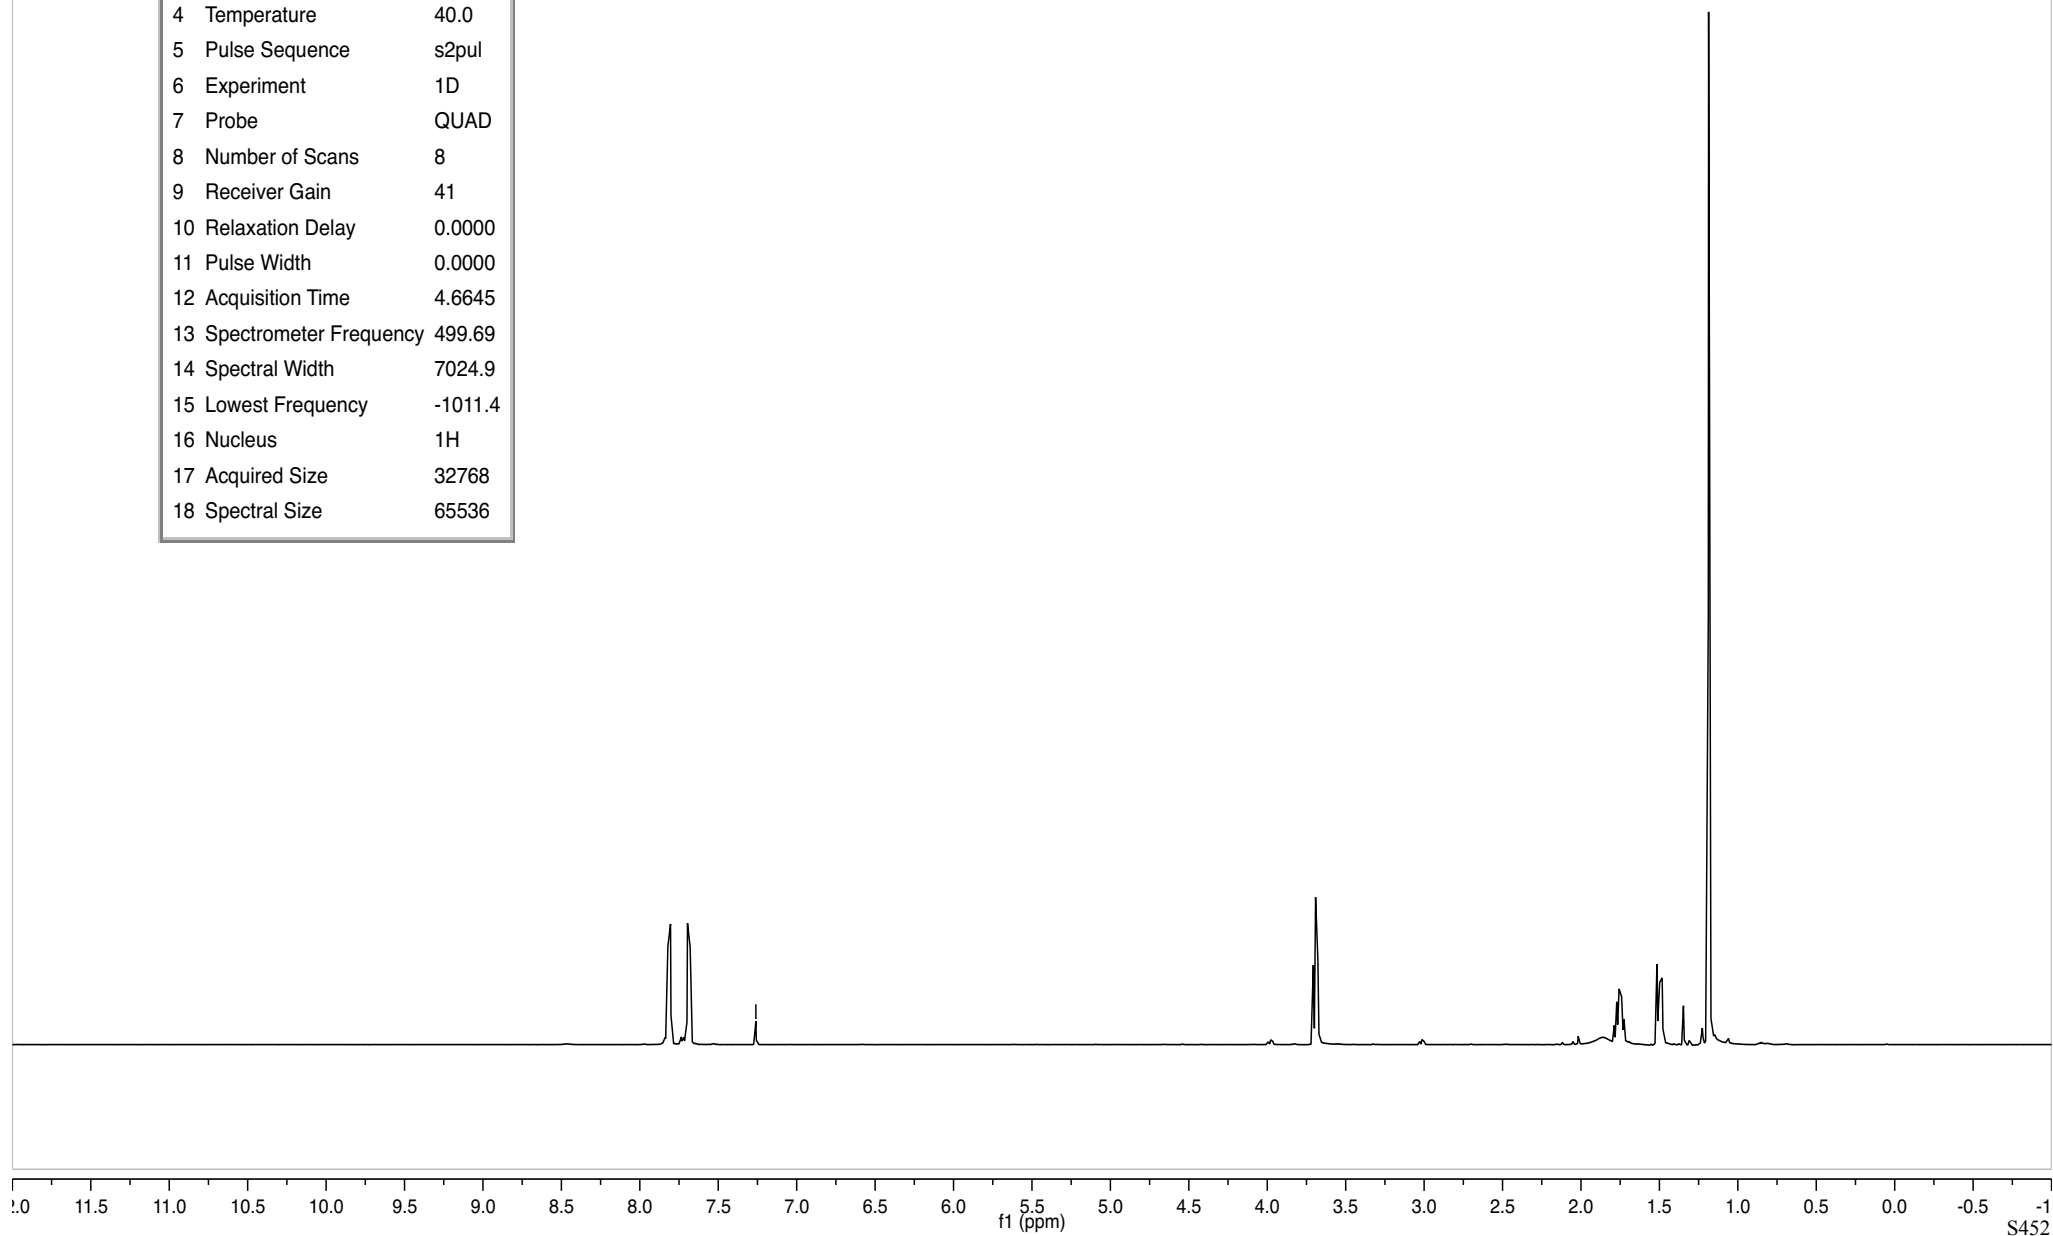

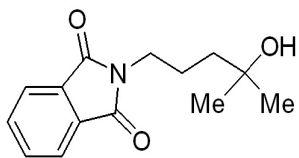

7.82  
7.81  
7.81  
7.80  
7.70  
7.69  
7.69  
7.68  
— 7.26 CDCl<sub>3</sub>

3.71  
3.69  
3.68

1.86  
1.79  
1.77  
1.76  
1.76  
1.75  
1.74  
1.73  
1.52  
1.51  
1.50  
1.49  
1.48  
1.19

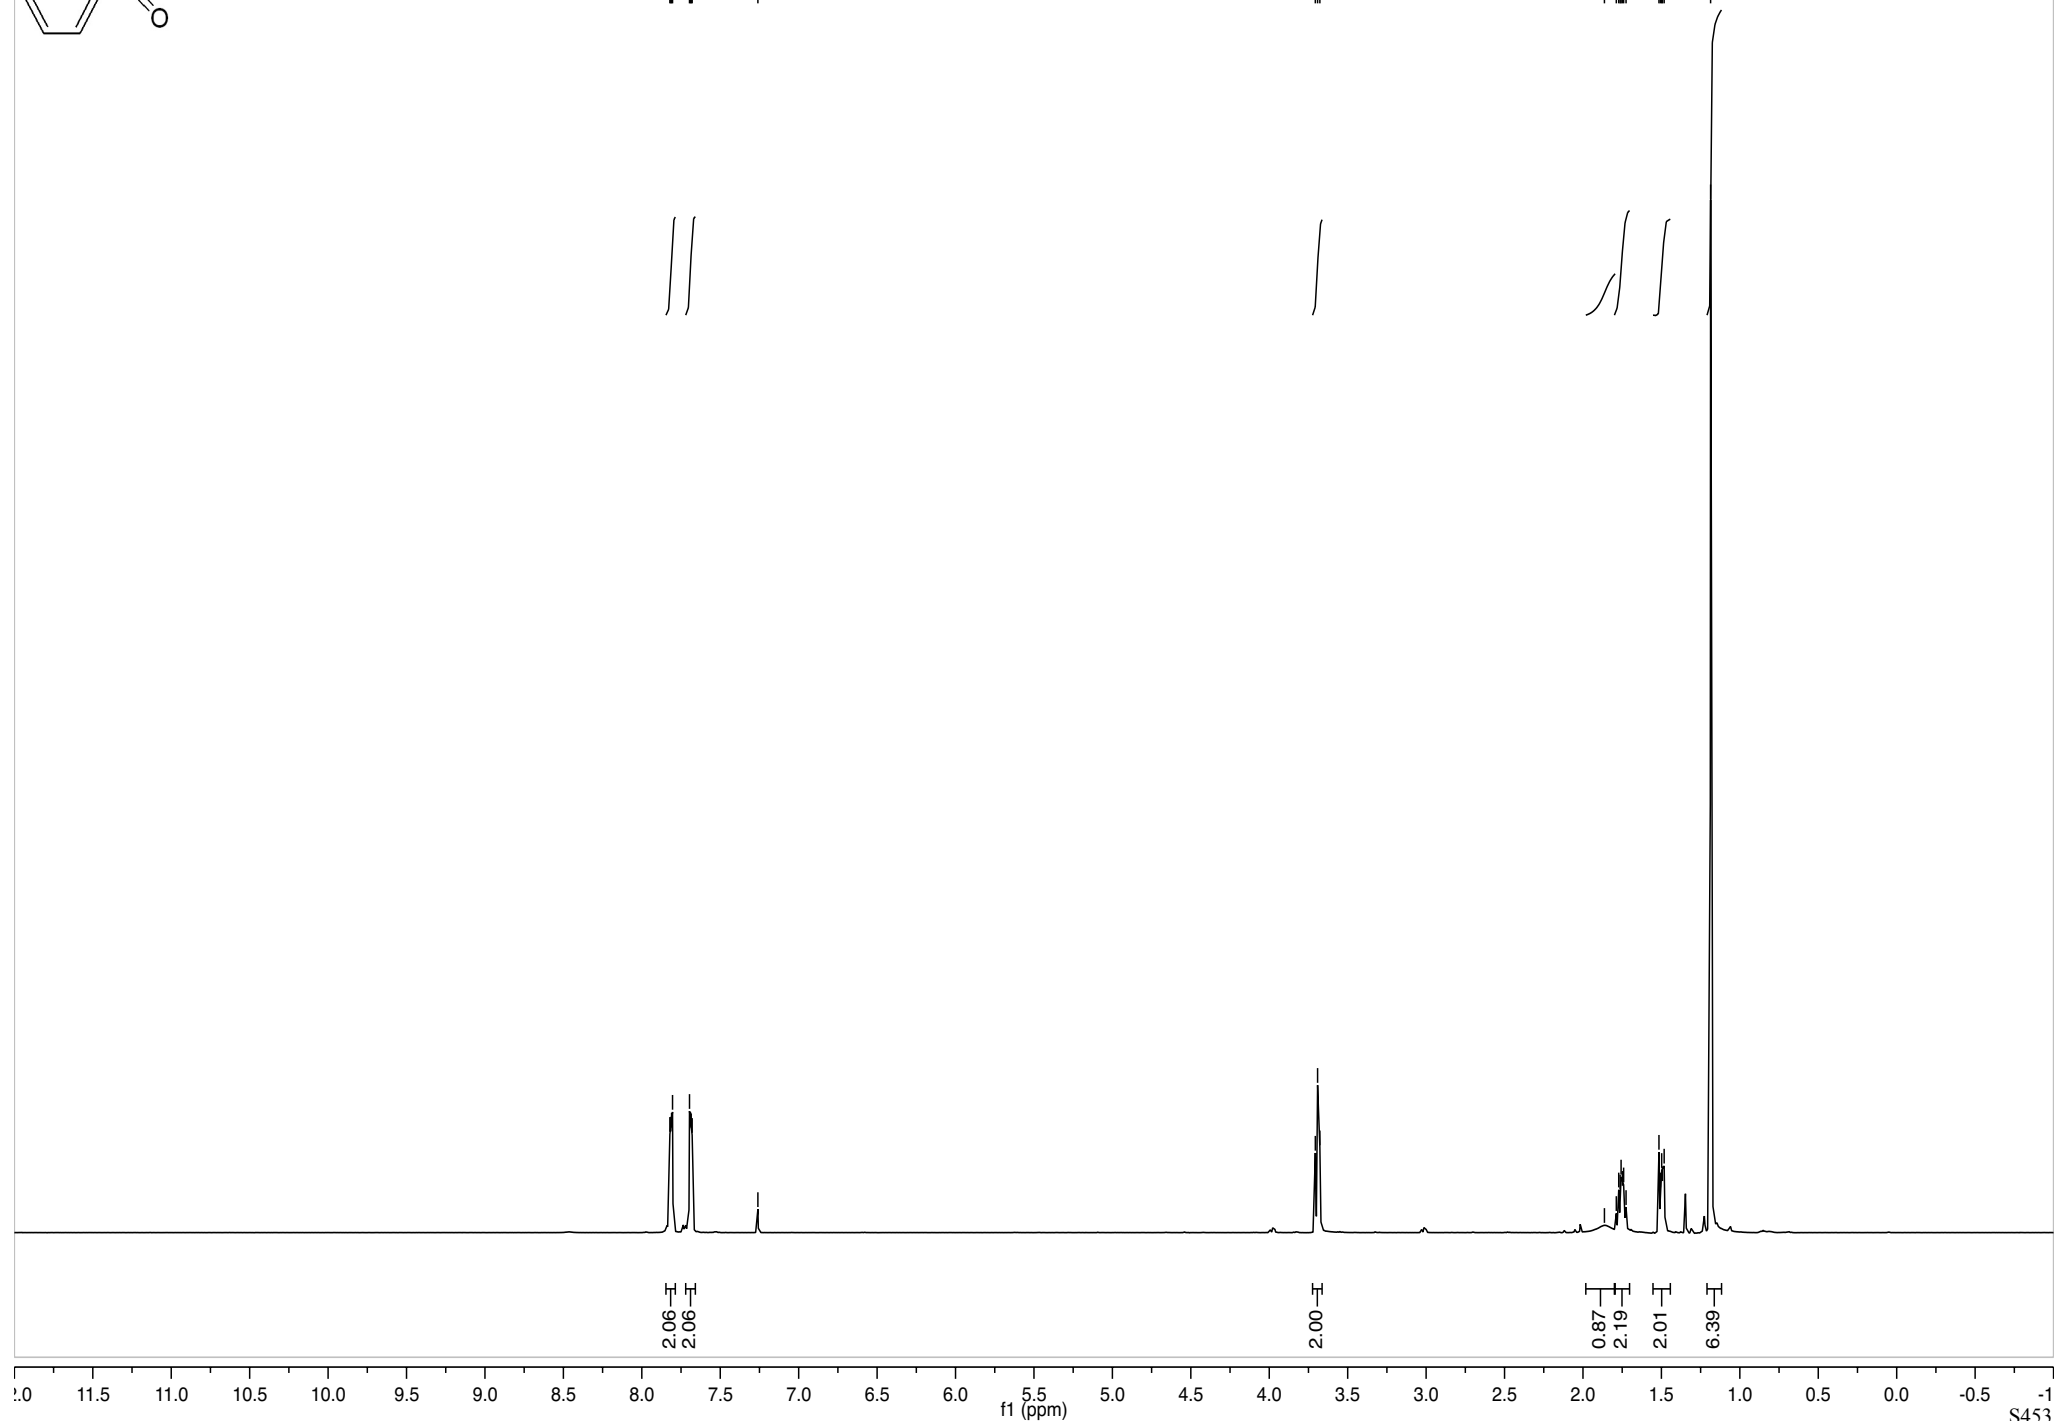

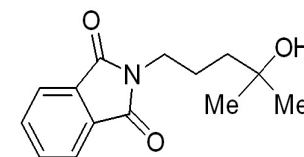

— 77.2 CDCl<sub>3</sub>

|    | Parameter              | Value             |
|----|------------------------|-------------------|
| 1  | Origin                 | Varian            |
| 2  | Spectrometer           | inova             |
| 3  | Solvent                | CDCl <sub>3</sub> |
| 4  | Temperature            | 40.0              |
| 5  | Pulse Sequence         | s2pul             |
| 6  | Experiment             | 1D                |
| 7  | Probe                  | QUAD              |
| 8  | Number of Scans        | 64                |
| 9  | Receiver Gain          | 60                |
| 10 | Relaxation Delay       | 1.0000            |
| 11 | Pulse Width            | 0.0000            |
| 12 | Acquisition Time       | 1.0863            |
| 13 | Spectrometer Frequency | 125.66            |
| 14 | Spectral Width         | 30165.9           |
| 15 | Lowest Frequency       | -1260.2           |
| 16 | Nucleus                | <sup>13</sup> C   |
| 17 | Acquired Size          | 32768             |
| 18 | Spectral Size          | 65536             |

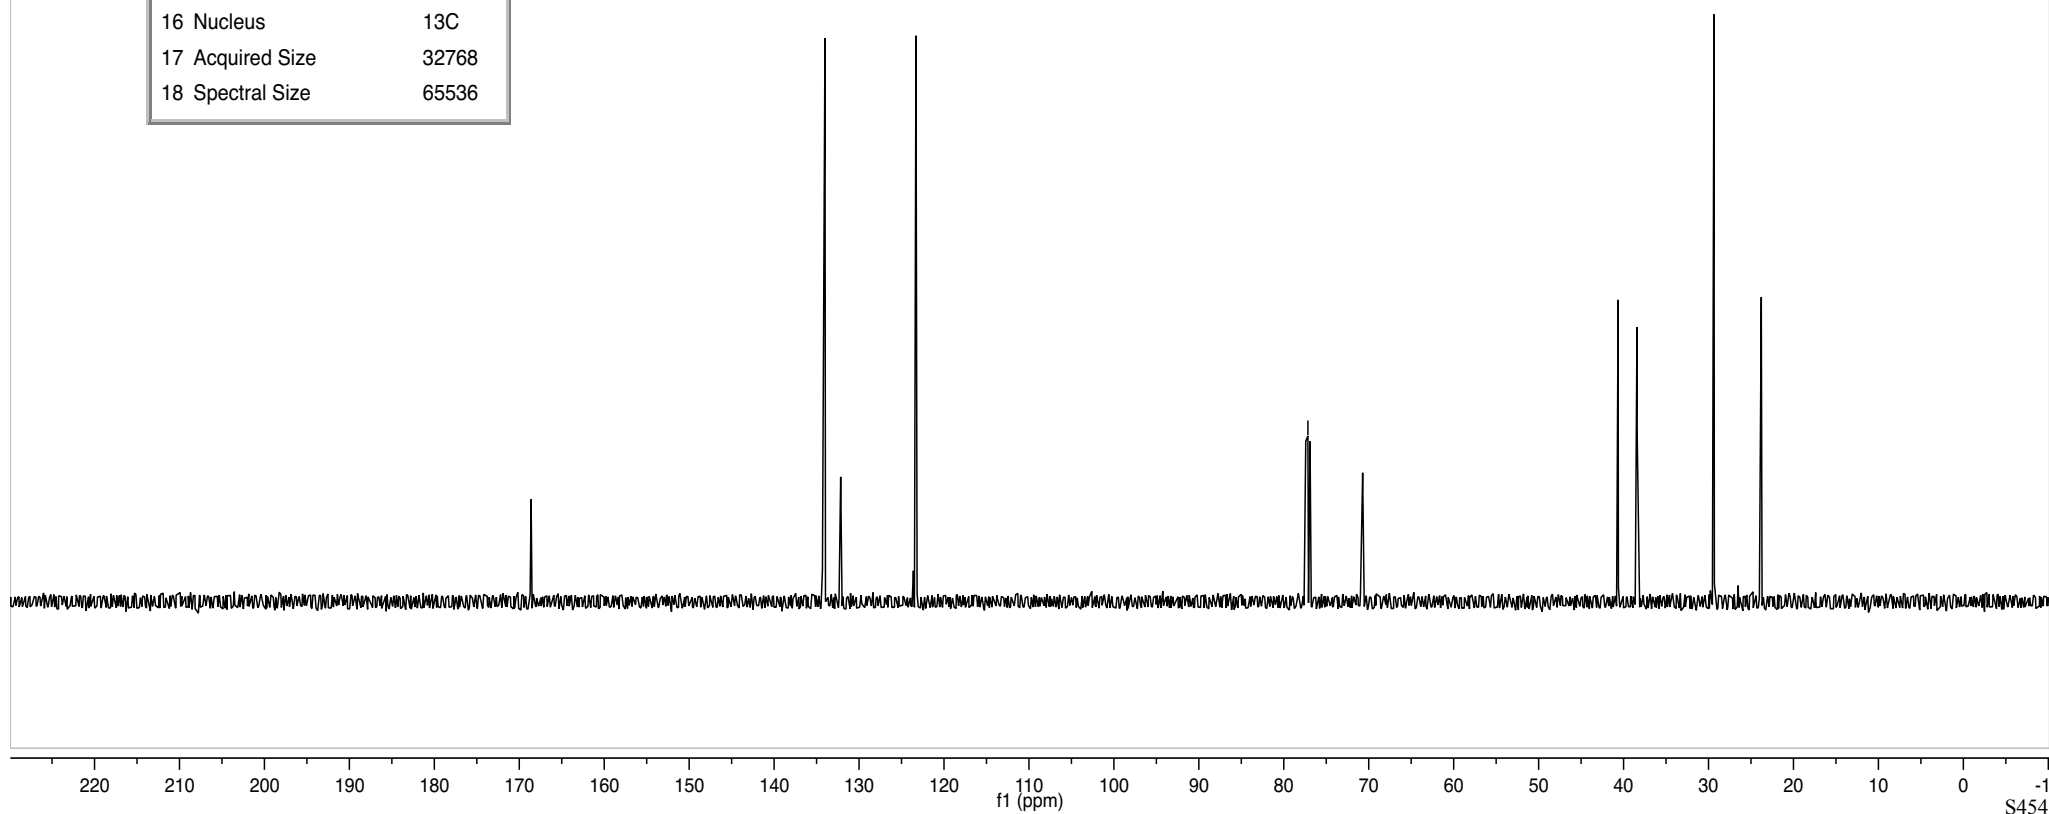

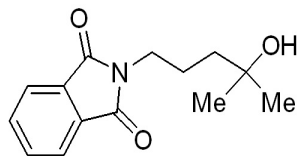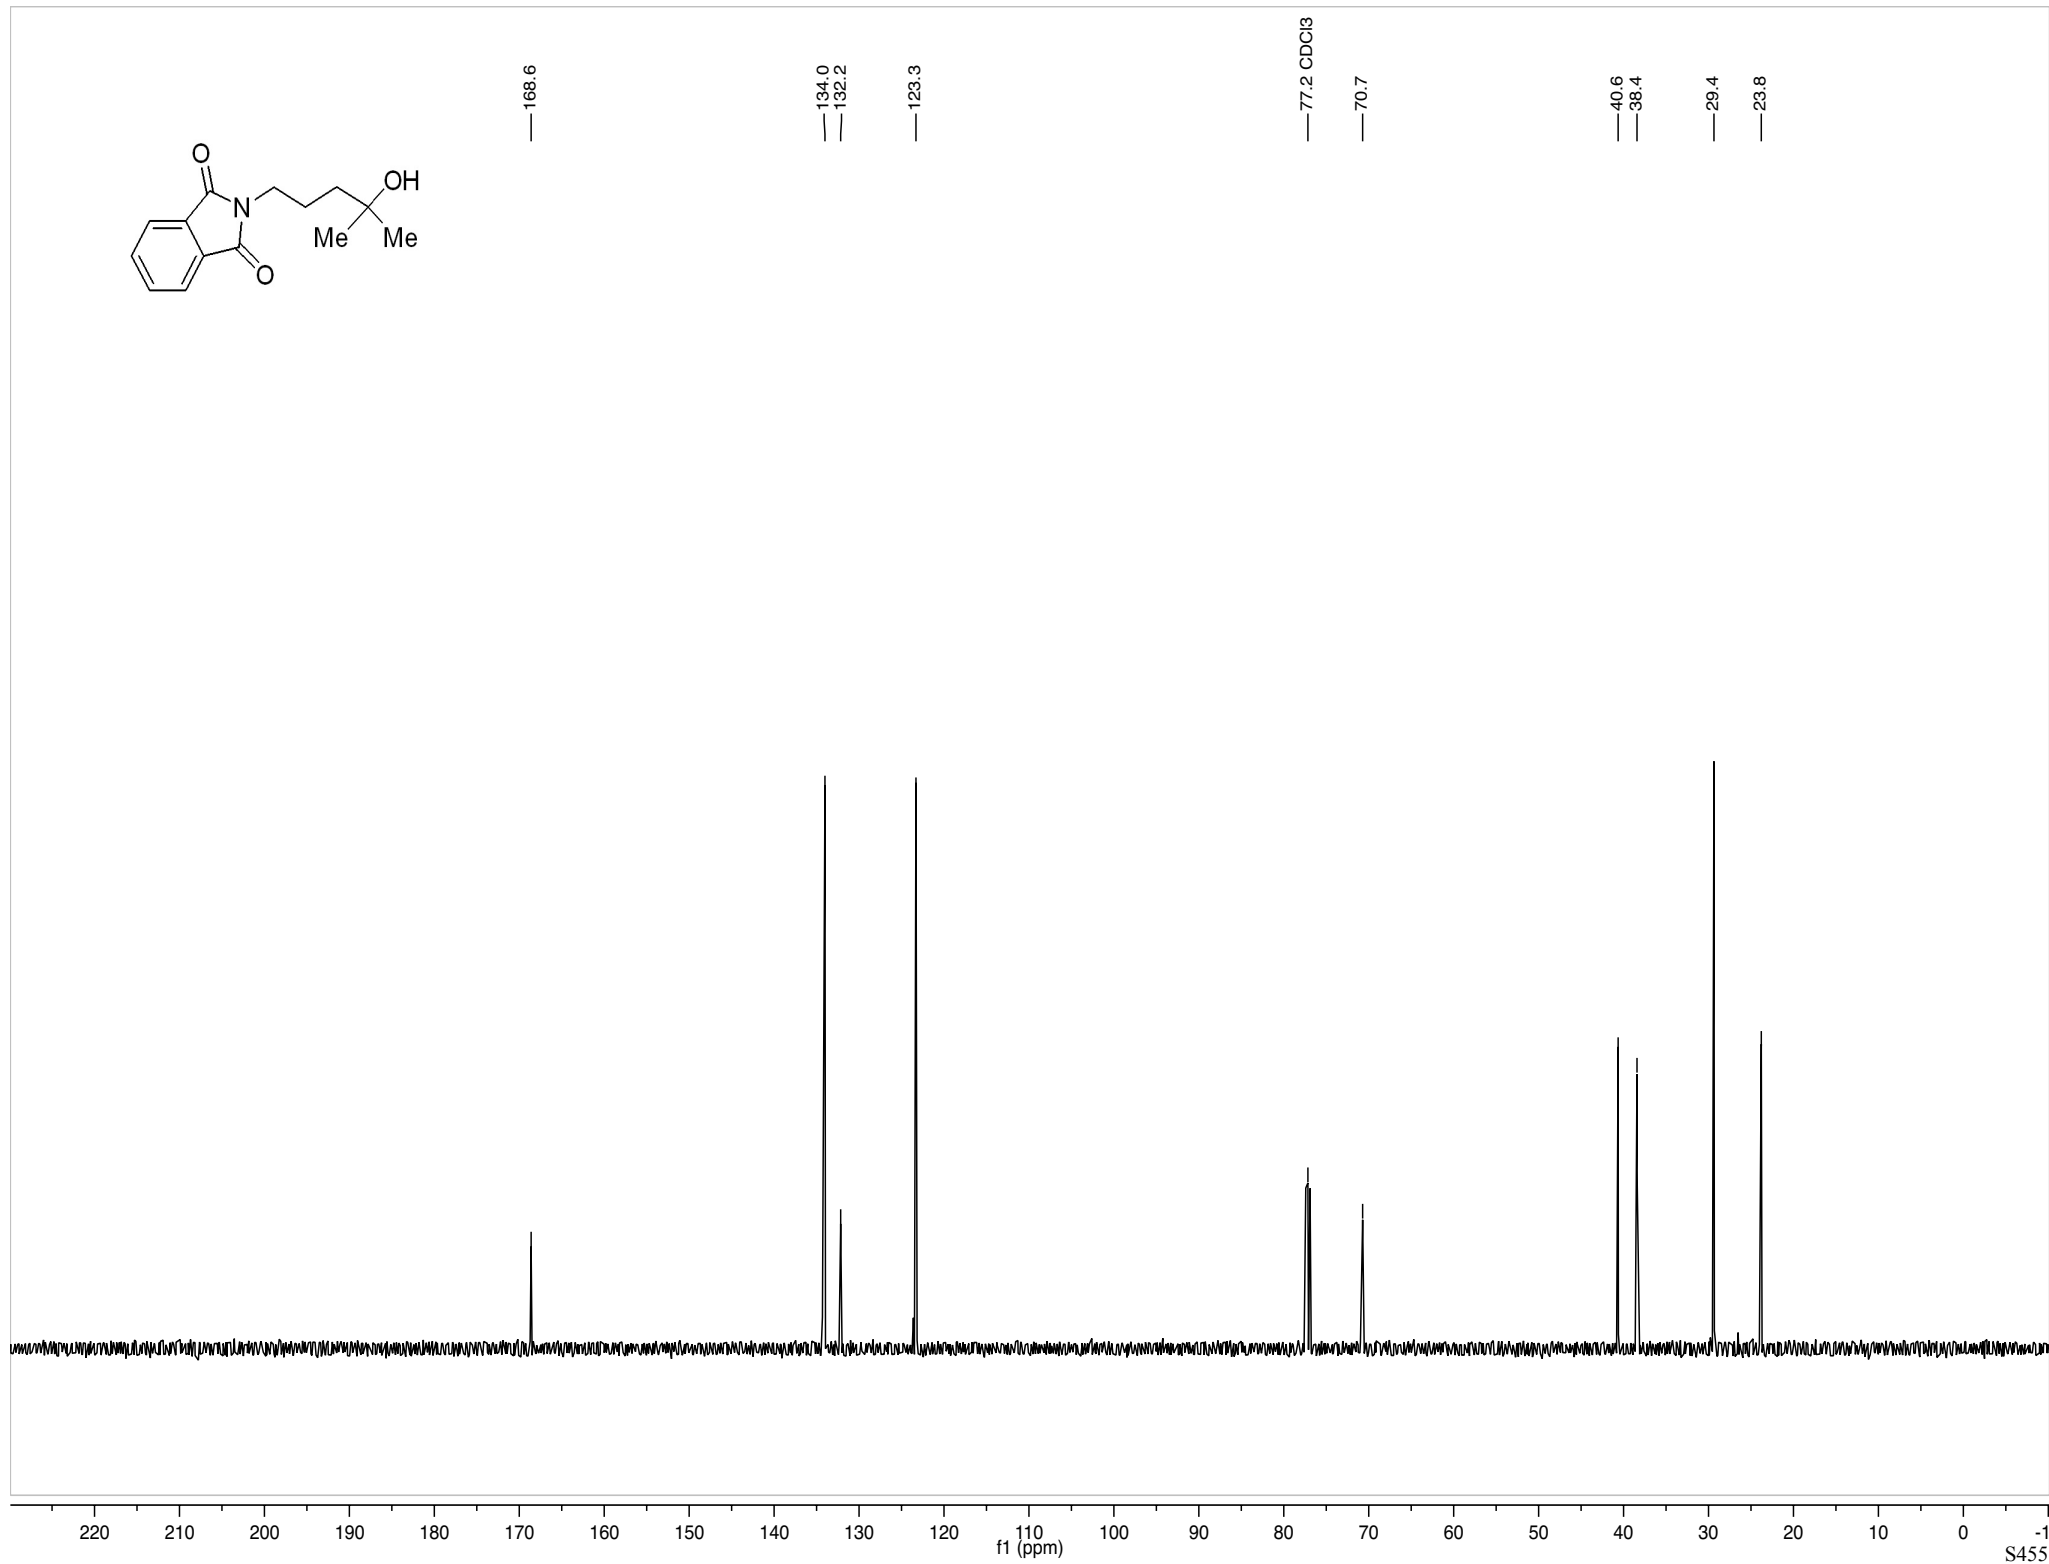



| Parameter                 | Value          |
|---------------------------|----------------|
| 1 Origin                  | Varian         |
| 2 Spectrometer            | inova          |
| 3 Solvent                 | CDCl3          |
| 4 Temperature             | 20.0           |
| 5 Pulse Sequence          | s2pul          |
| 6 Experiment              | 1D             |
| 7 Probe                   | QUAD           |
| 8 Number of Scans         | 8              |
| 9 Receiver Gain           | 41             |
| 10 Relaxation Delay       | 0.0000         |
| 11 Pulse Width            | 0.0000         |
| 12 Acquisition Time       | 4.6645         |
| 13 Spectrometer Frequency | 499.69         |
| 14 Spectral Width         | 7024.9         |
| 15 Lowest Frequency       | -1021.4        |
| 16 Nucleus                | <sup>1</sup> H |
| 17 Acquired Size          | 32768          |
| 18 Spectral Size          | 65536          |

—7.3 CDCl3

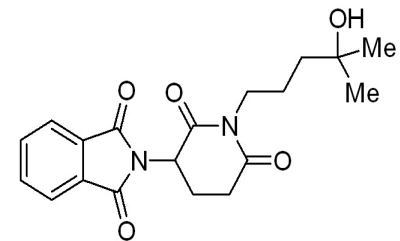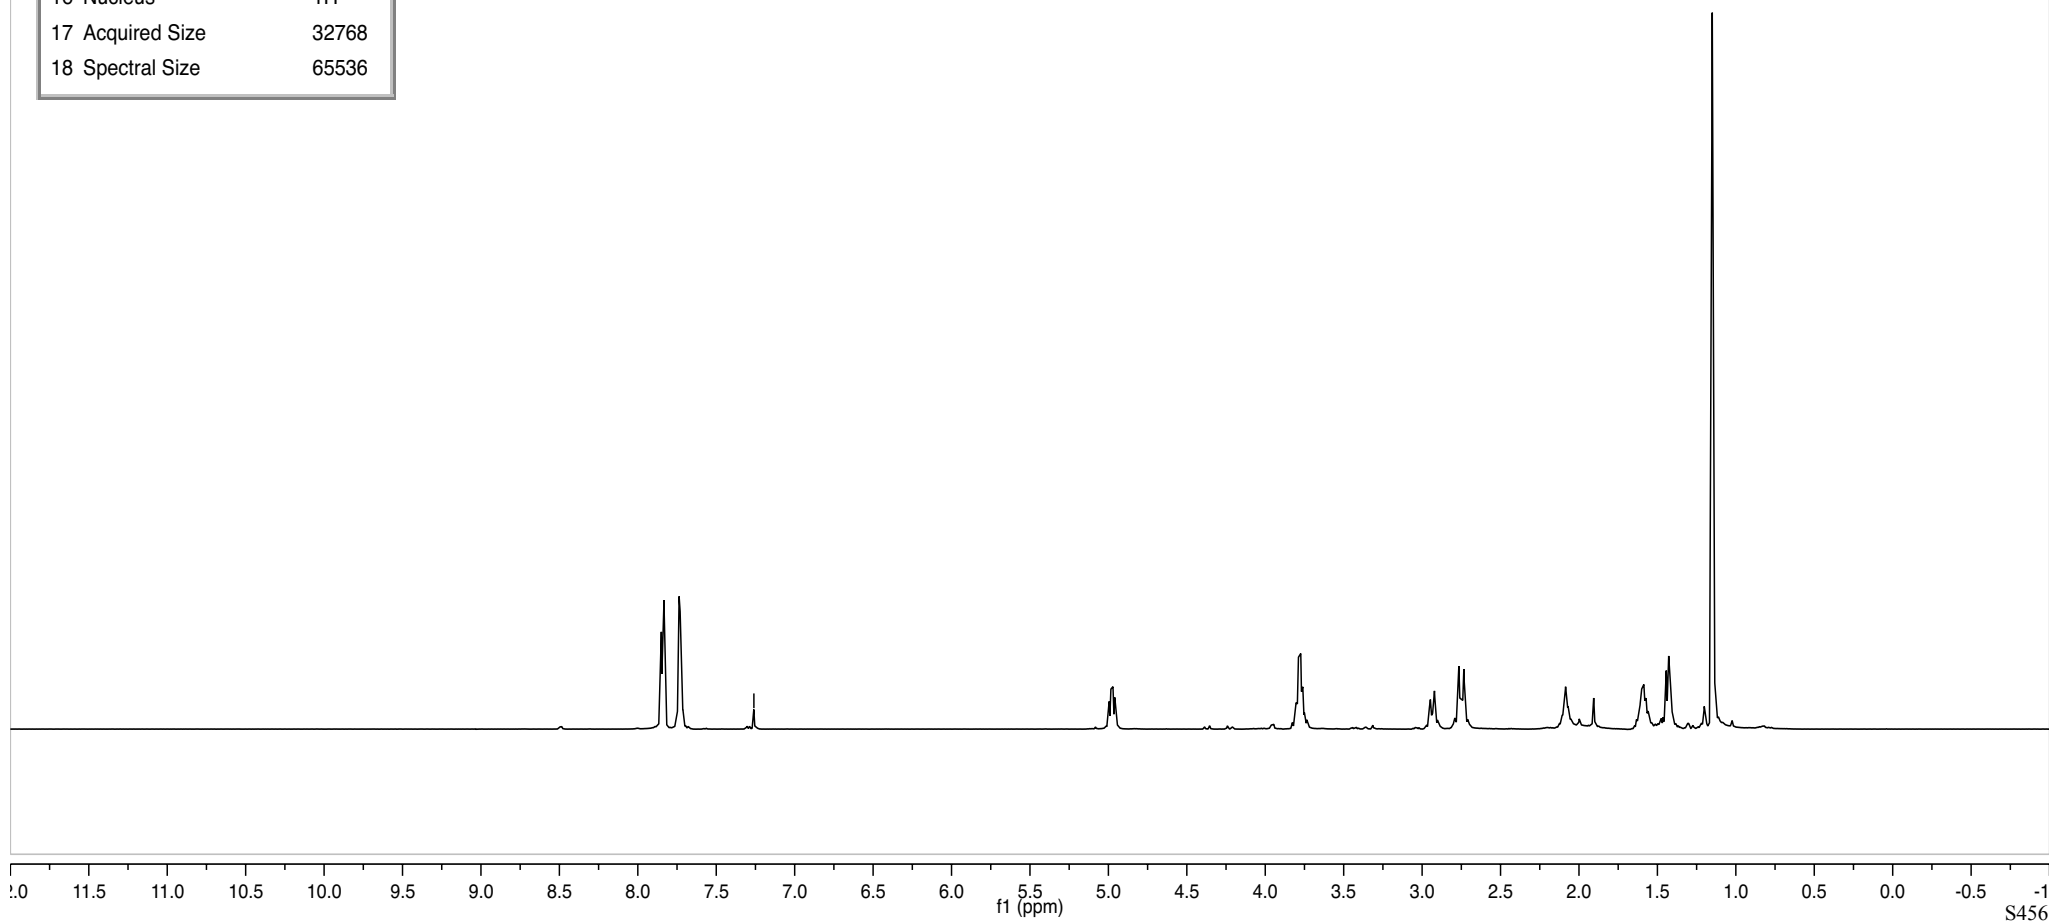

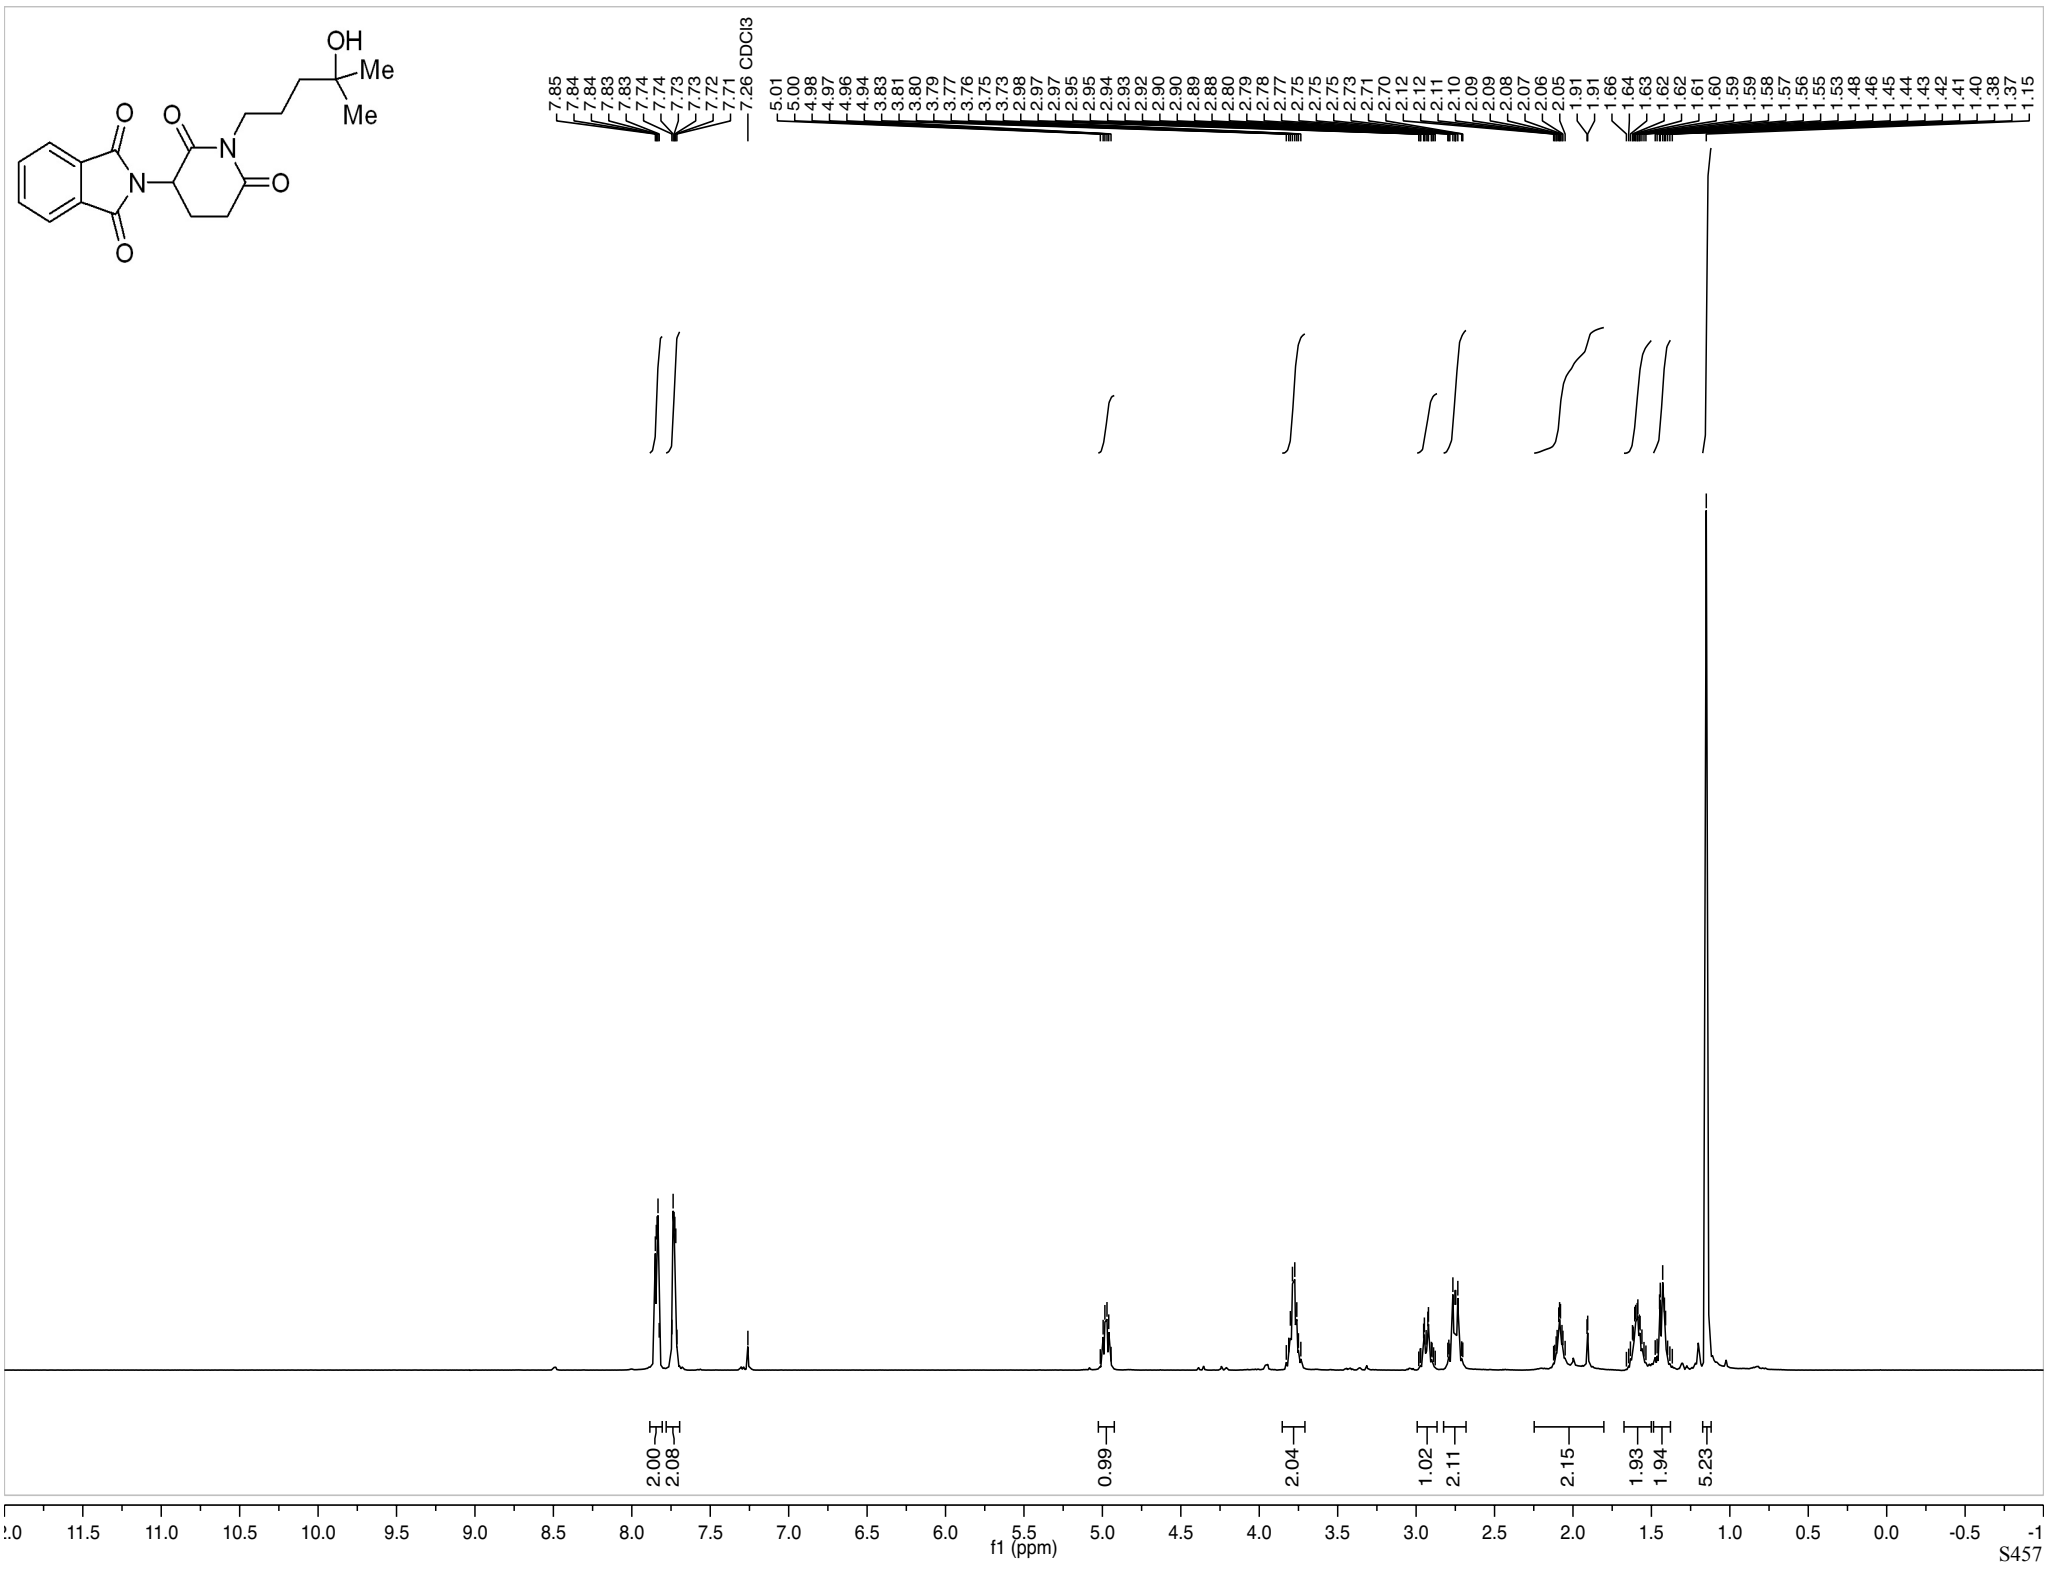

| Parameter                 | Value           |
|---------------------------|-----------------|
| 1 Origin                  | Varian          |
| 2 Spectrometer            | inova           |
| 3 Solvent                 | CDCl3           |
| 4 Temperature             | 20.0            |
| 5 Pulse Sequence          | s2pul           |
| 6 Experiment              | 1D              |
| 7 Probe                   | QUAD            |
| 8 Number of Scans         | 112             |
| 9 Receiver Gain           | 60              |
| 10 Relaxation Delay       | 1.0000          |
| 11 Pulse Width            | 0.0000          |
| 12 Acquisition Time       | 1.0863          |
| 13 Spectrometer Frequency | 125.66          |
| 14 Spectral Width         | 30165.9         |
| 15 Lowest Frequency       | -1282.7         |
| 16 Nucleus                | <sup>13</sup> C |
| 17 Acquired Size          | 32768           |
| 18 Spectral Size          | 65536           |

— 77.2 CDCl<sub>3</sub>

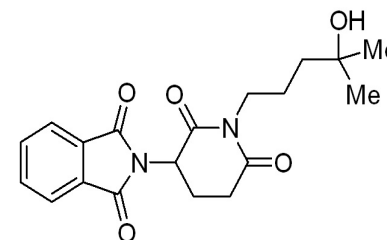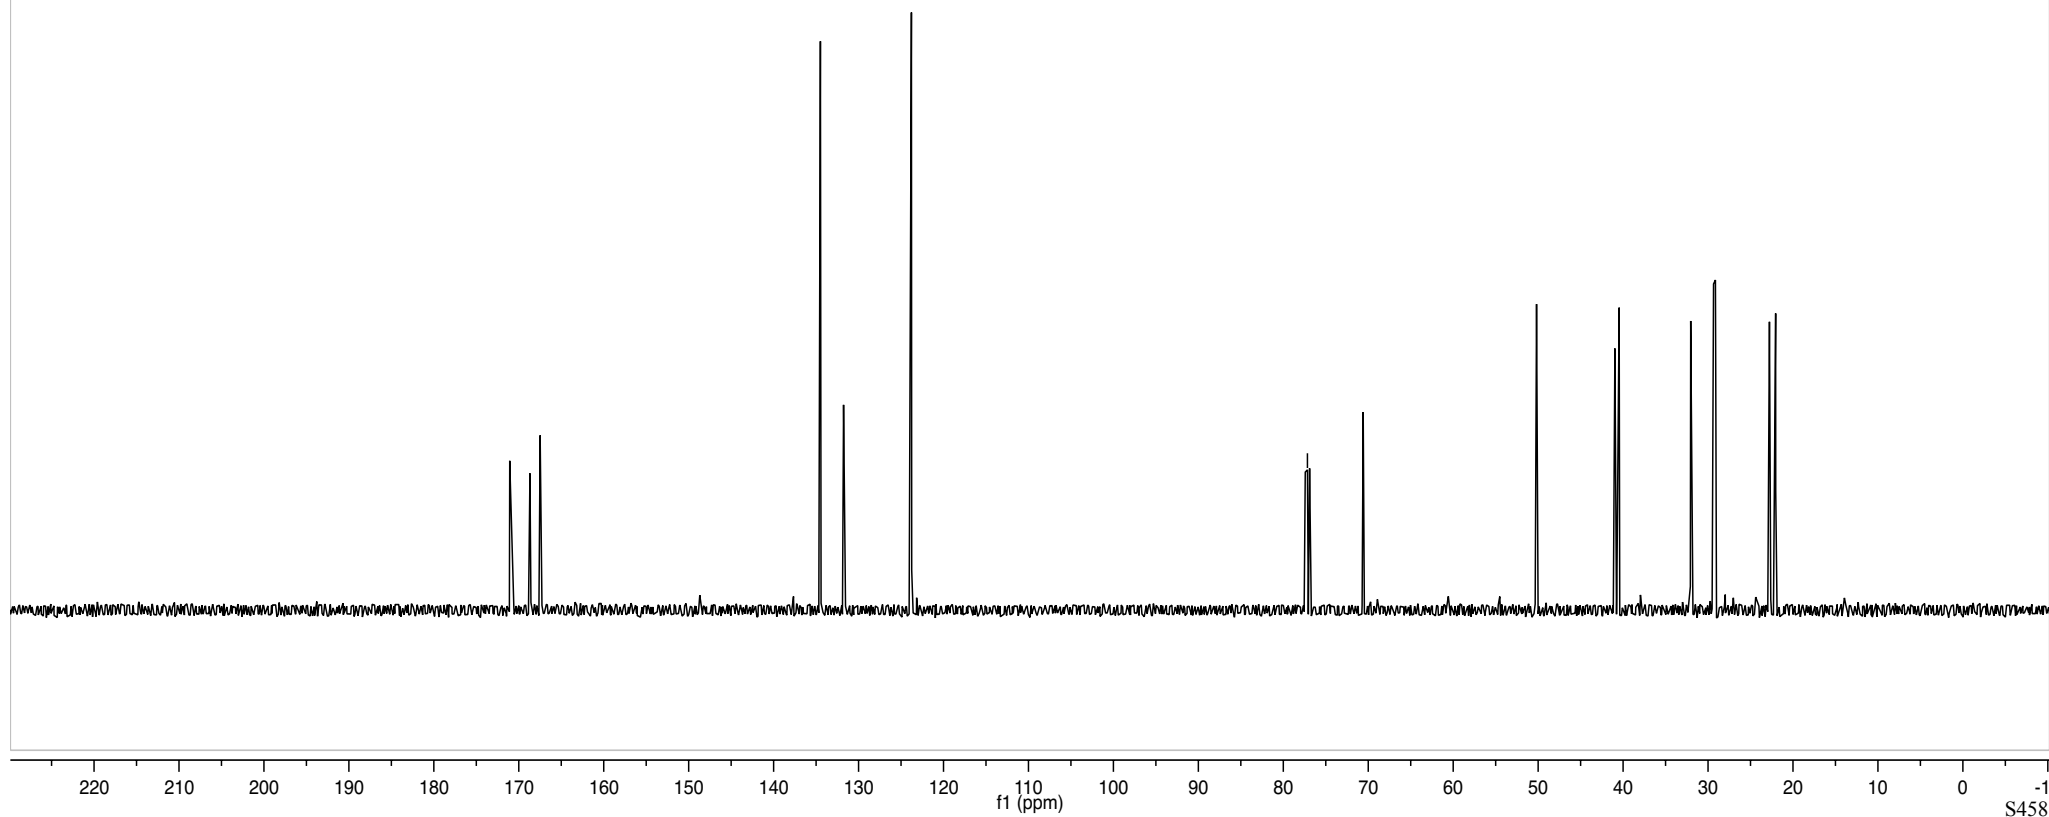

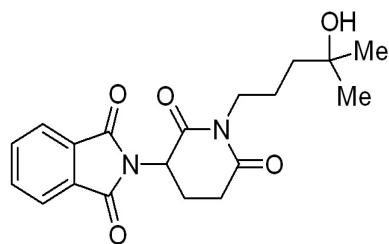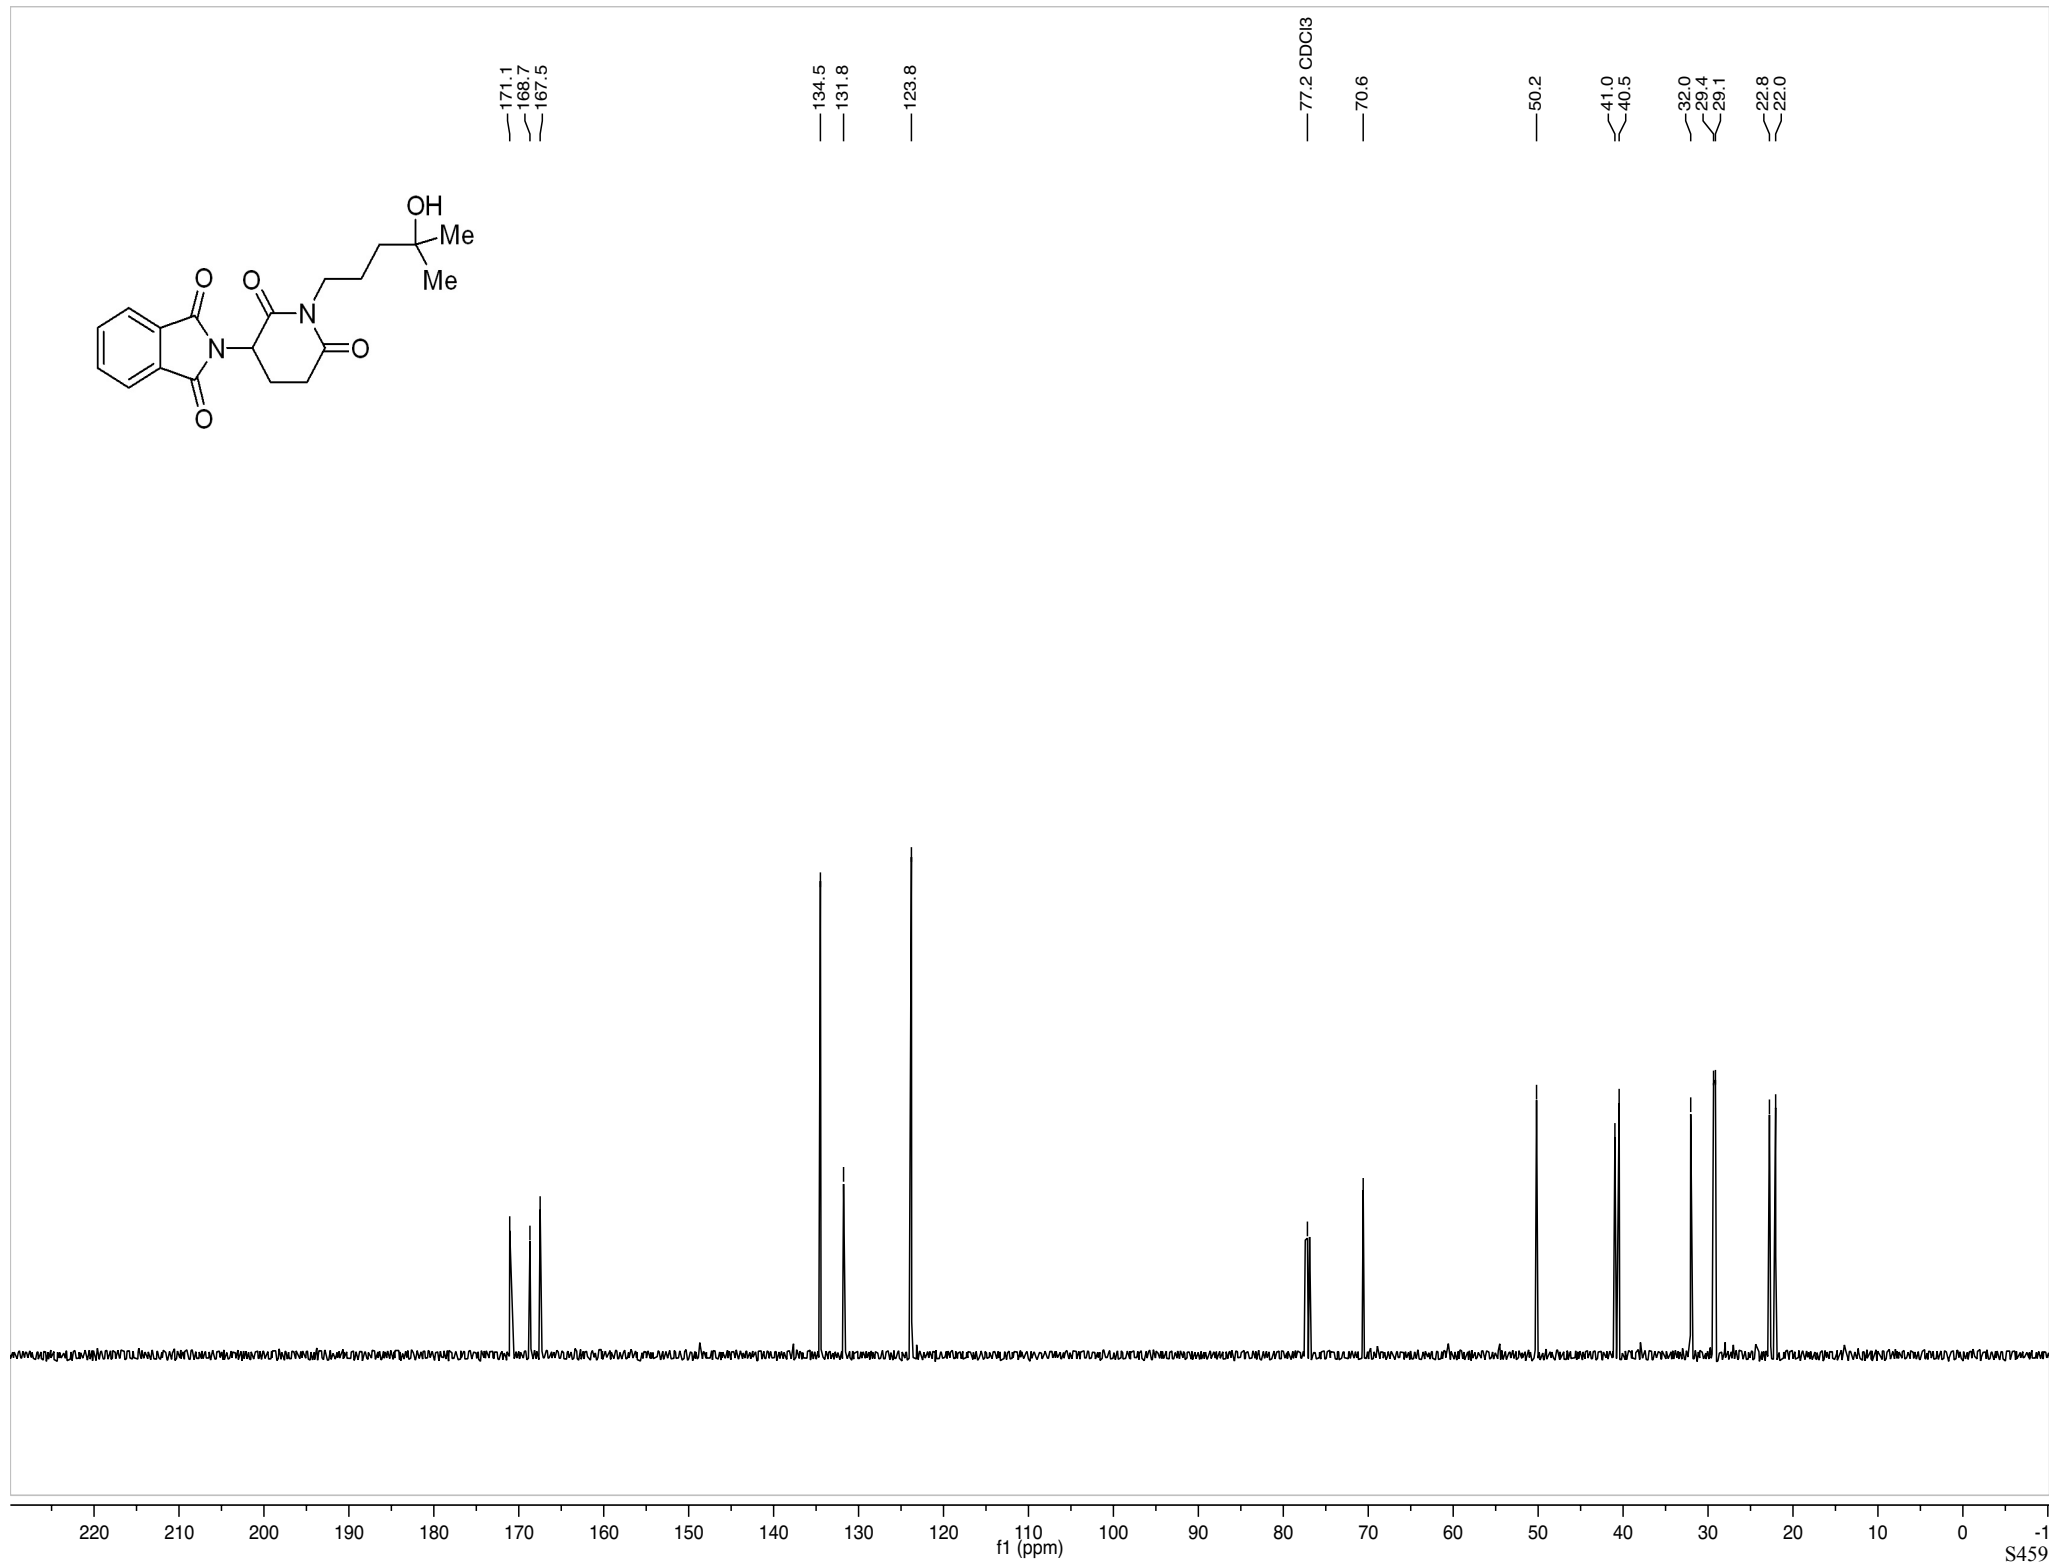

| Parameter              | Value          |
|------------------------|----------------|
| Origin                 | Varian         |
| Spectrometer           | inova          |
| Solvent                | CDCl3          |
| Temperature            | 20.0           |
| Pulse Sequence         | s2pul          |
| Experiment             | 1D             |
| Probe                  | hcn            |
| Number of Scans        | 16             |
| Receiver Gain          | 38             |
| Relaxation Delay       | 2.0000         |
| Pulse Width            | 0.0000         |
| Acquisition Time       | 4.0960         |
| Spectrometer Frequency | 500.07         |
| Spectral Width         | 8000.0         |
| Lowest Frequency       | -1521.1        |
| Nucleus                | <sup>1</sup> H |
| Acquired Size          | 32768          |
| Spectral Size          | 65536          |

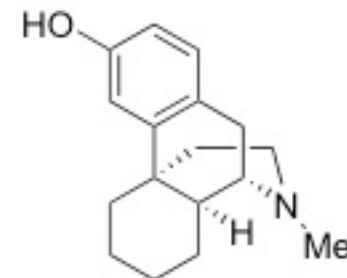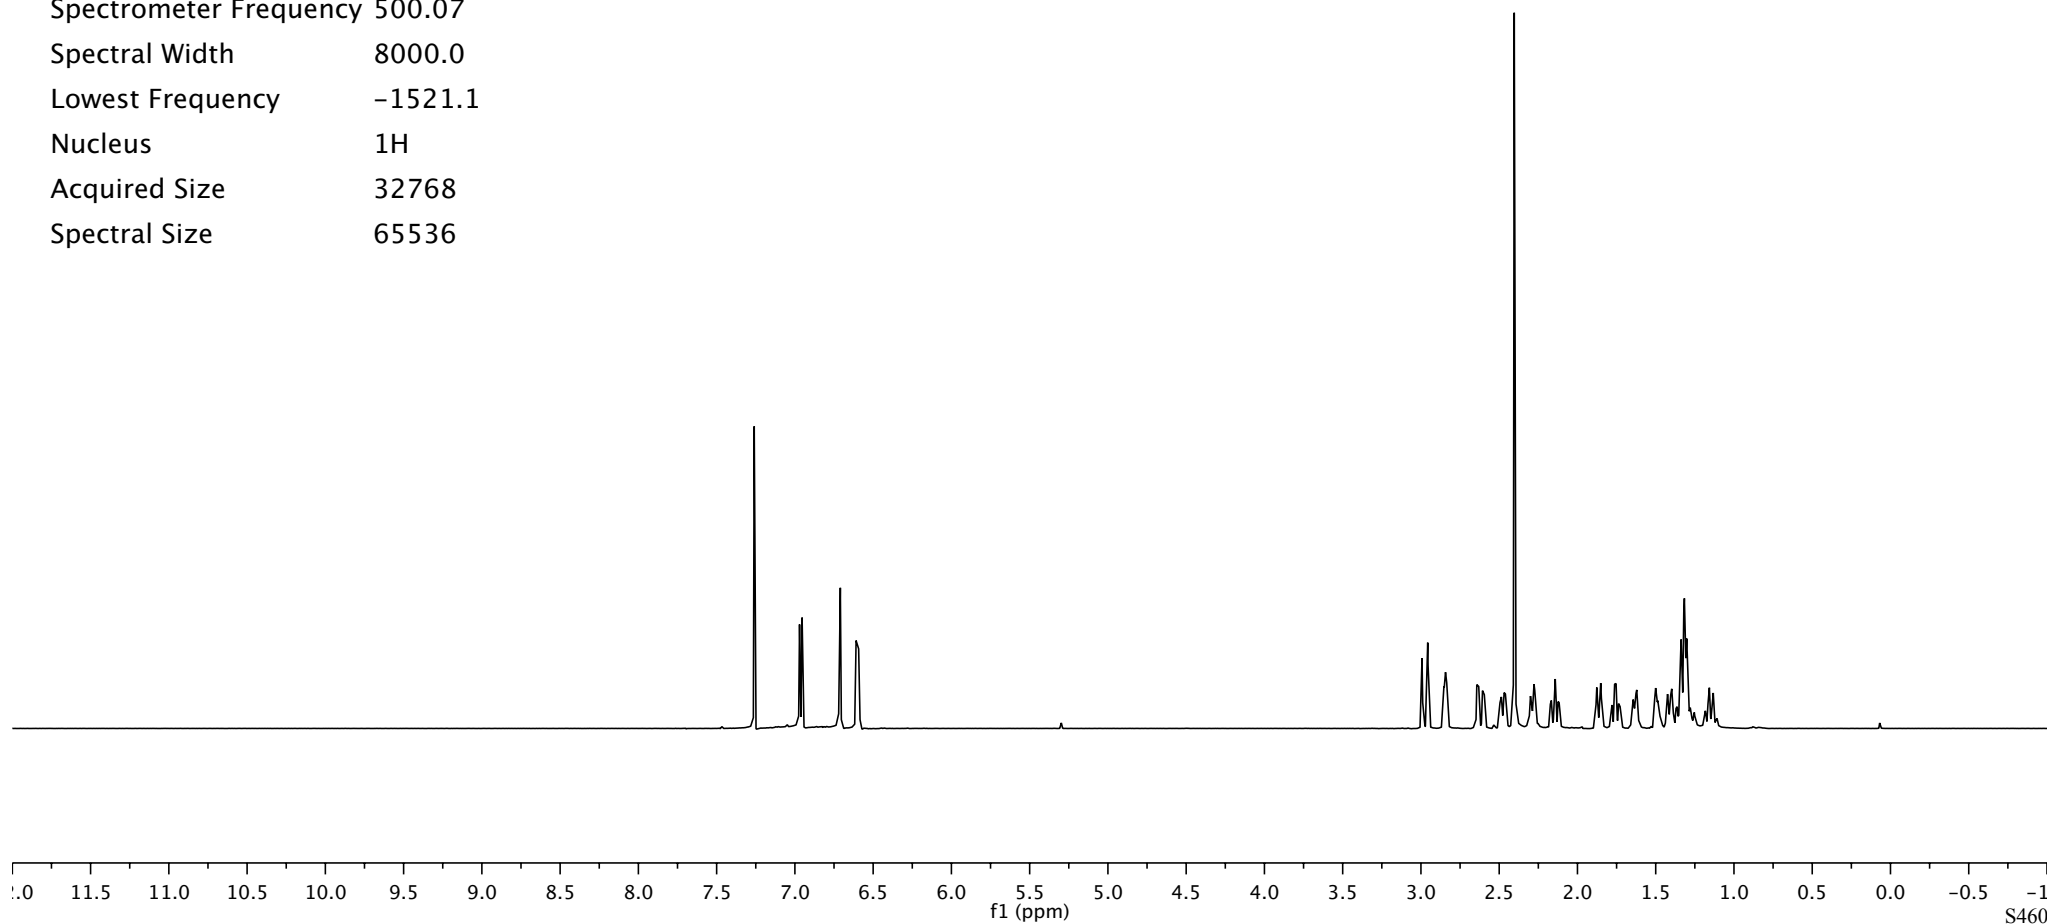

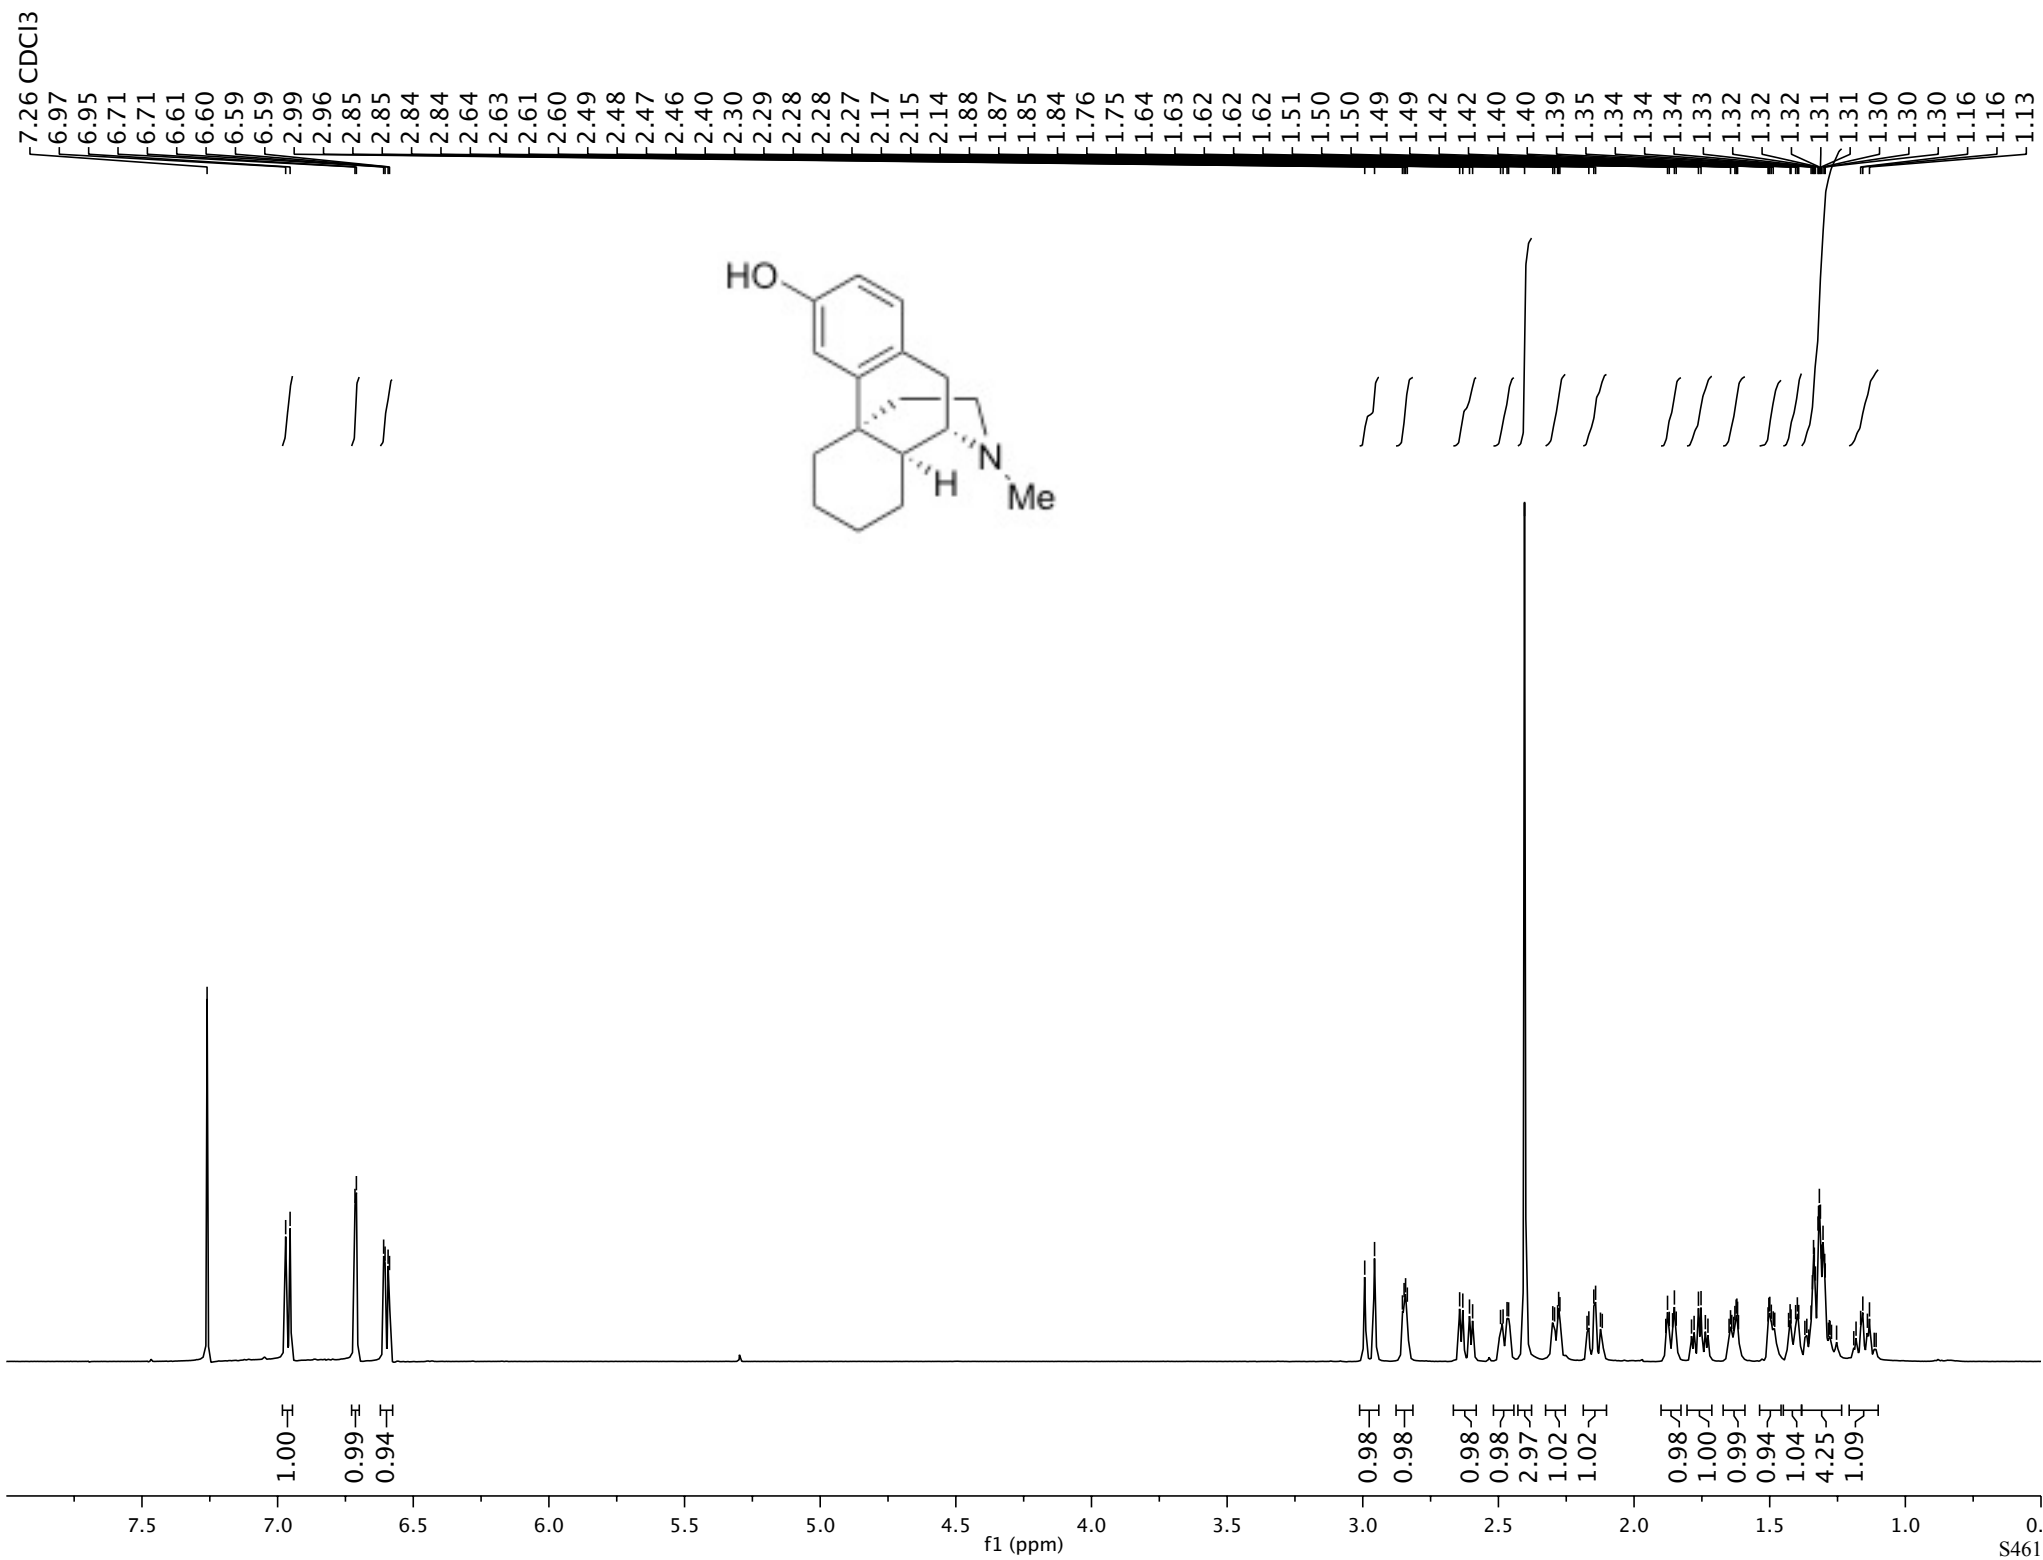

| Parameter              | Value          |
|------------------------|----------------|
| Origin                 | Varian         |
| Spectrometer           | vnmrs          |
| Solvent                | cdcl3          |
| Temperature            | 25.0           |
| Pulse Sequence         | s2pul          |
| Experiment             | 1D             |
| Probe                  | triax          |
| Number of Scans        | 16             |
| Receiver Gain          | 18             |
| Relaxation Delay       | 15.0000        |
| Pulse Width            | 0.0000         |
| Acquisition Time       | 2.9098         |
| Spectrometer Frequency | 749.38         |
| Spectral Width         | 5630.6         |
| Lowest Frequency       | 355.3          |
| Nucleus                | <sup>1</sup> H |
| Acquired Size          | 16384          |
| Spectral Size          | 65536          |

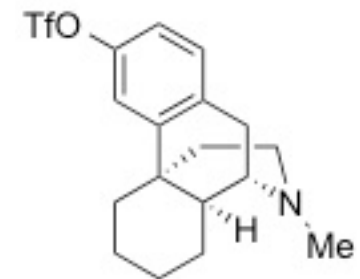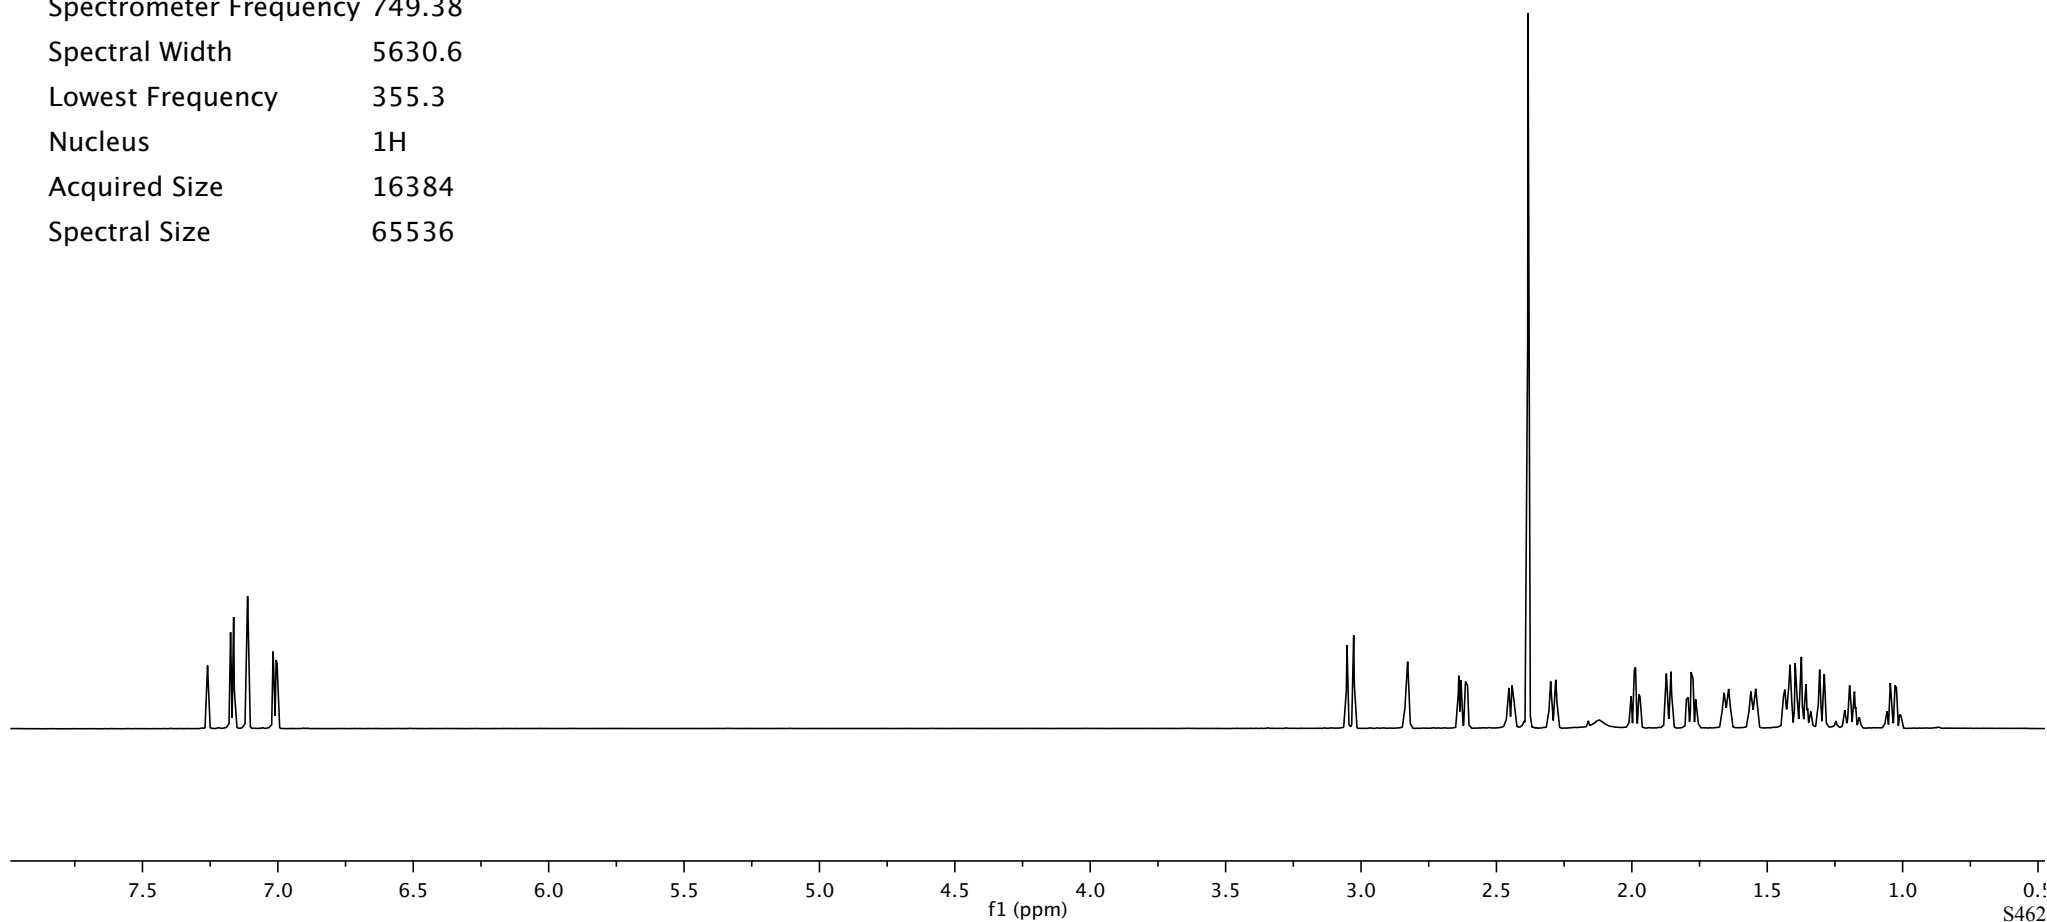

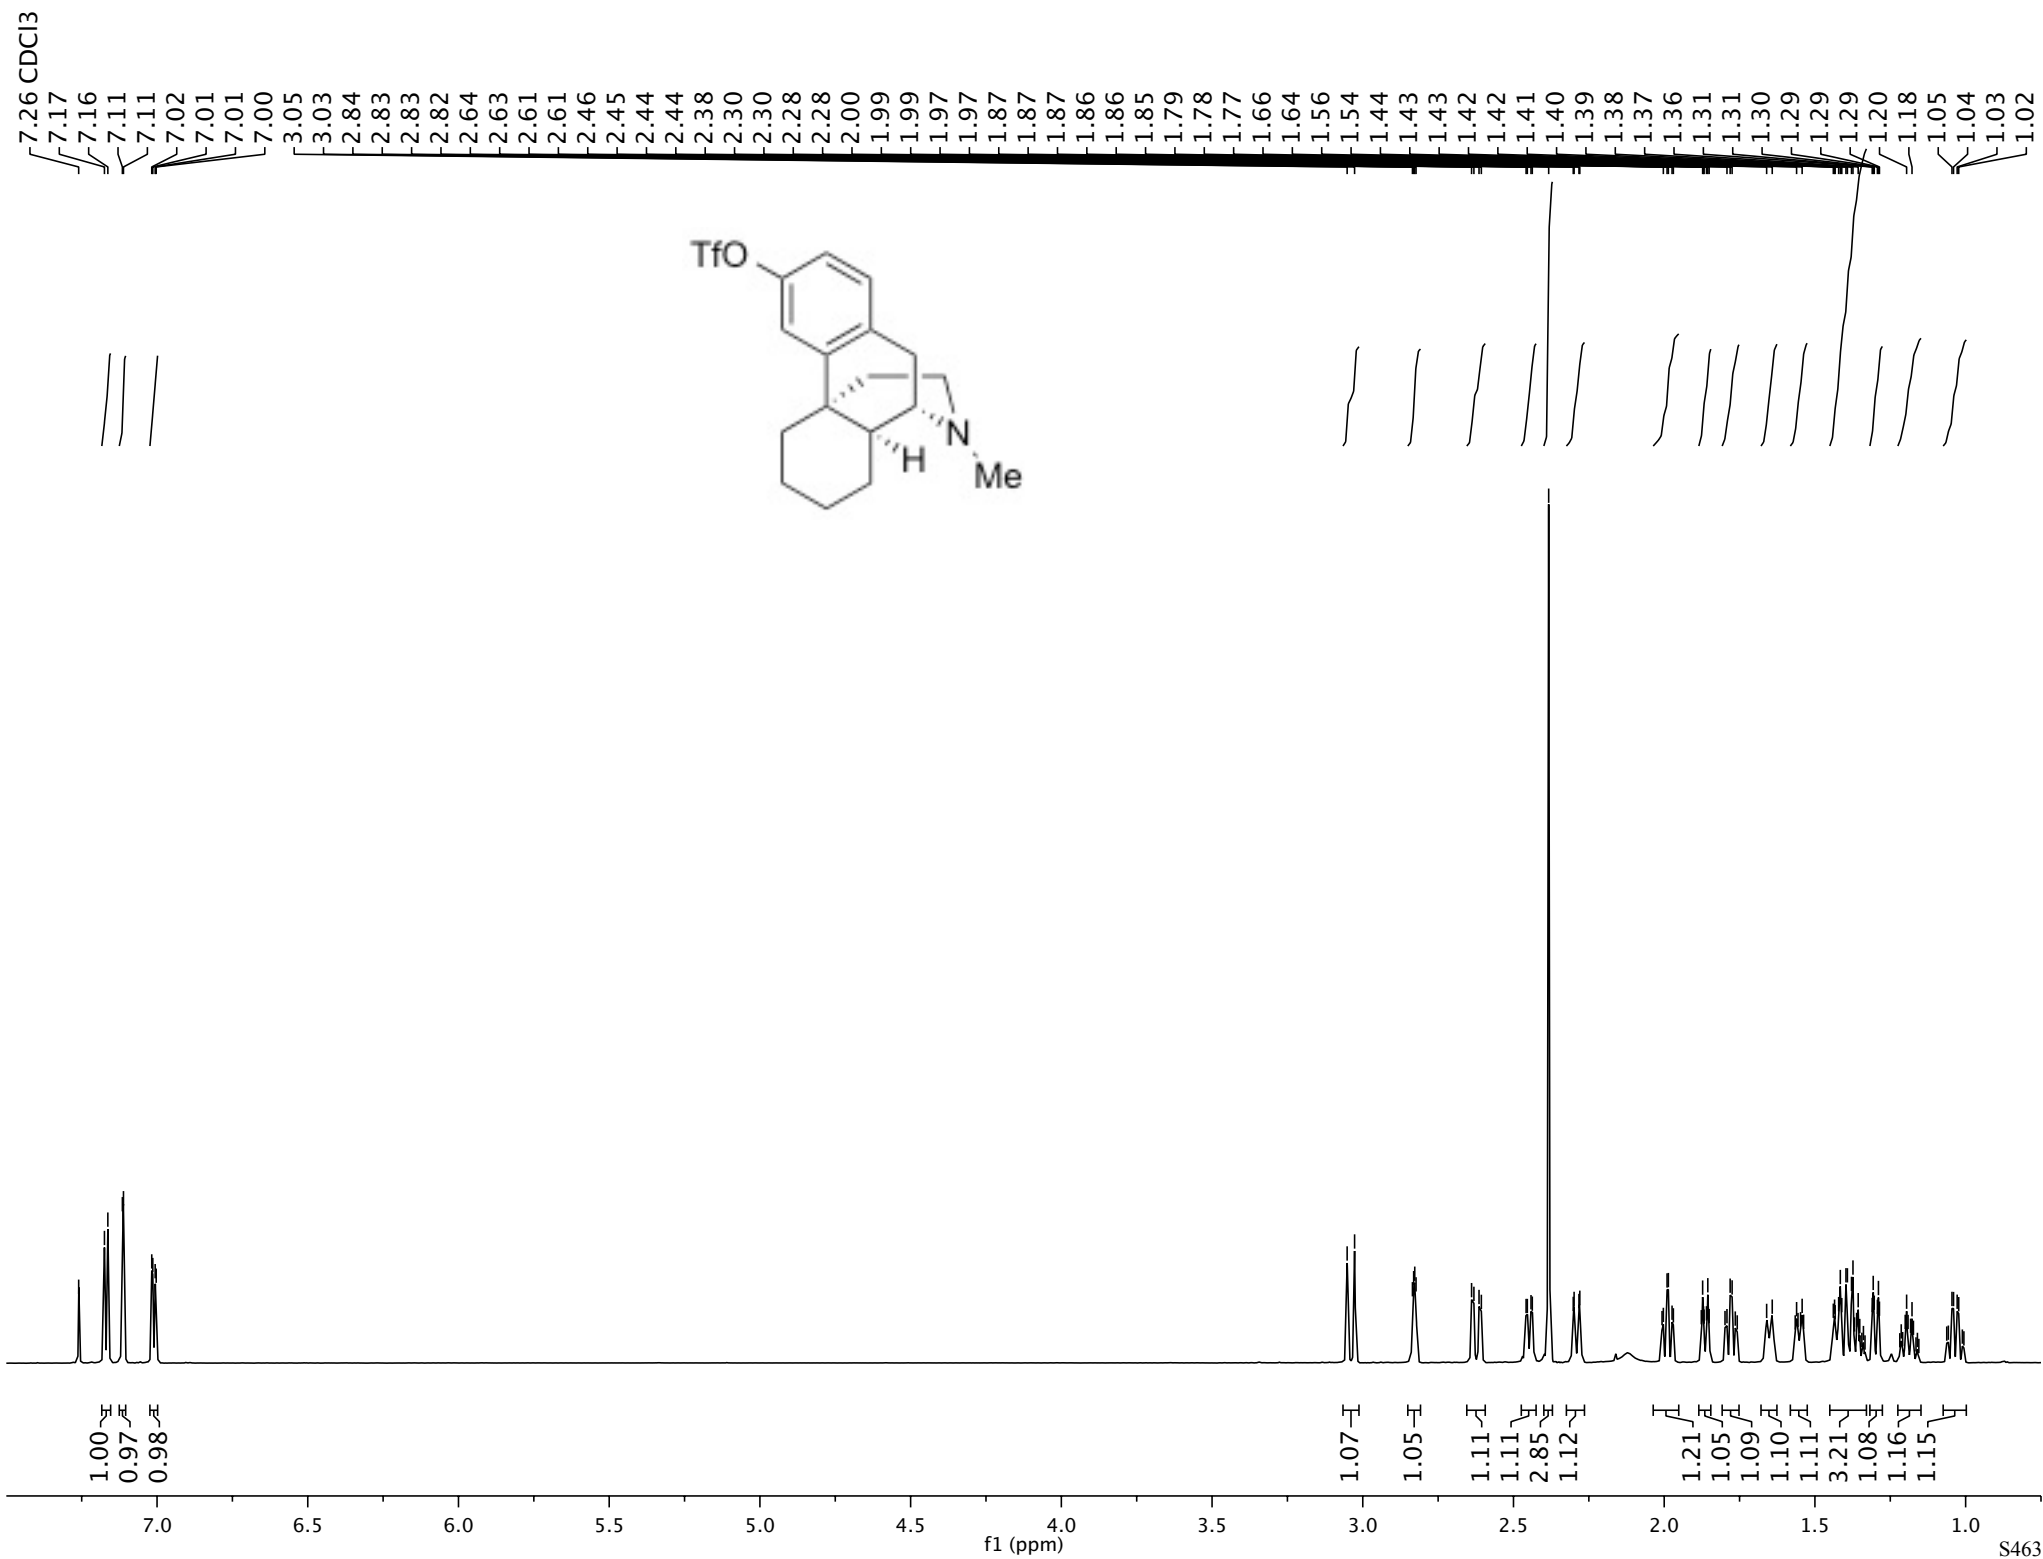



| Parameter              | Value           |
|------------------------|-----------------|
| Origin                 | Varian          |
| Spectrometer           | inova           |
| Solvent                | CDCl3           |
| Temperature            | 20.0            |
| Pulse Sequence         | s2pul           |
| Experiment             | 1D              |
| Probe                  | QUAD            |
| Number of Scans        | 128             |
| Receiver Gain          | 52              |
| Relaxation Delay       | 0.0000          |
| Pulse Width            | 0.0000          |
| Acquisition Time       | 0.3277          |
| Spectrometer Frequency | 470.15          |
| Spectral Width         | 100000.0        |
| Lowest Frequency       | -79501.3        |
| Nucleus                | <sup>19</sup> F |
| Acquired Size          | 32768           |
| Spectral Size          | 65536           |

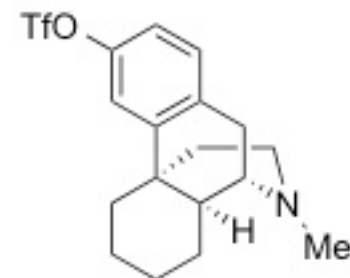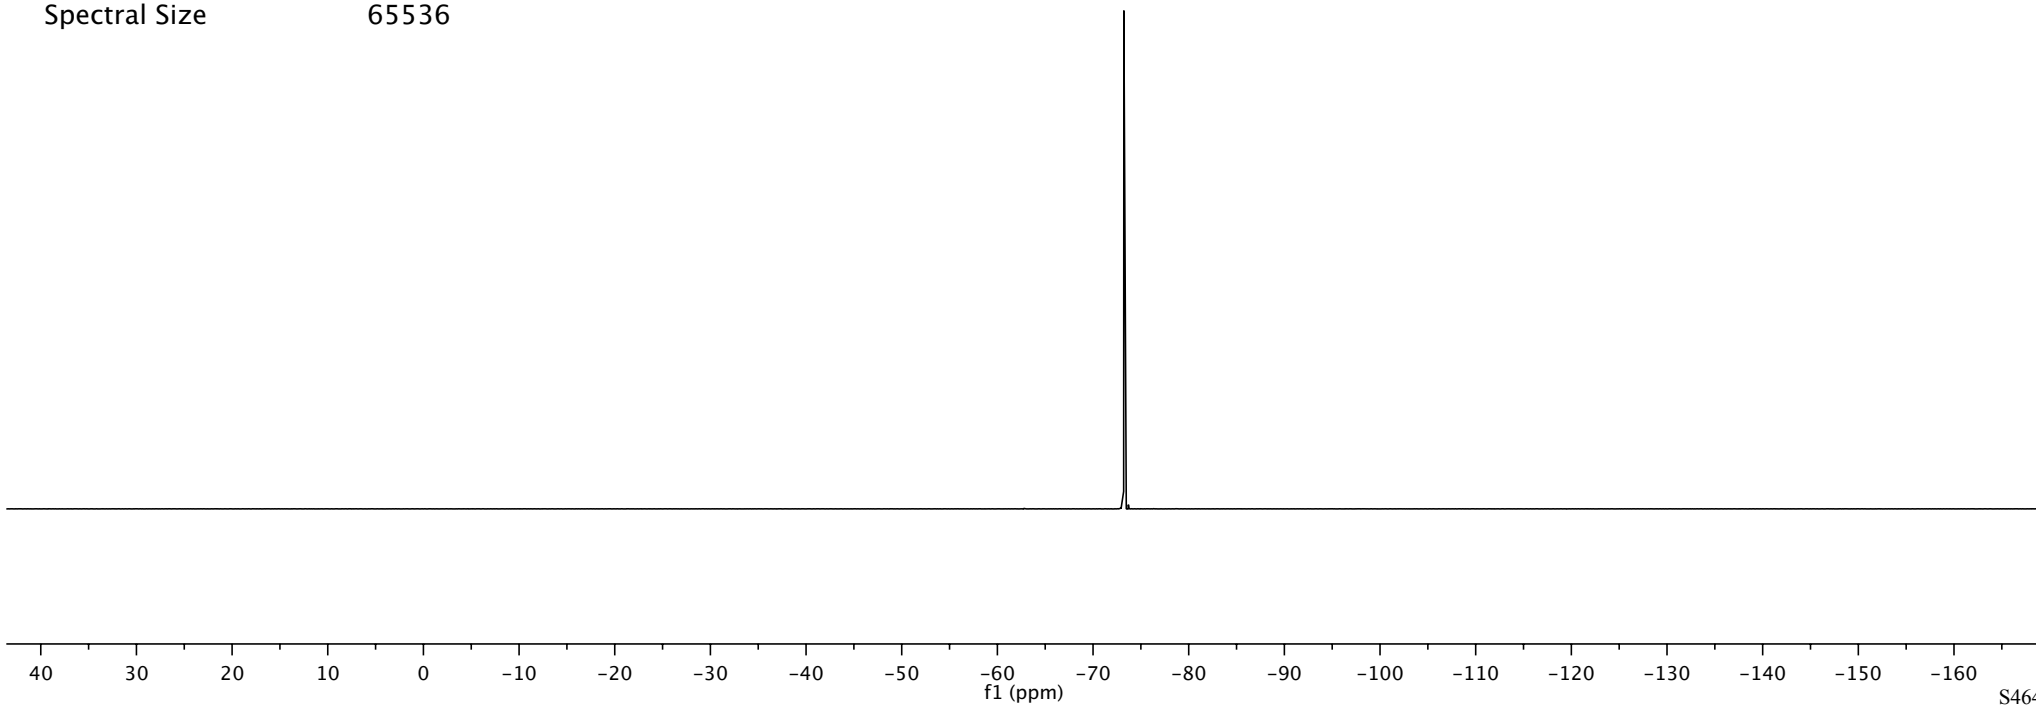

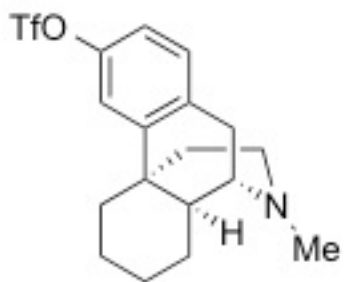

--73.22

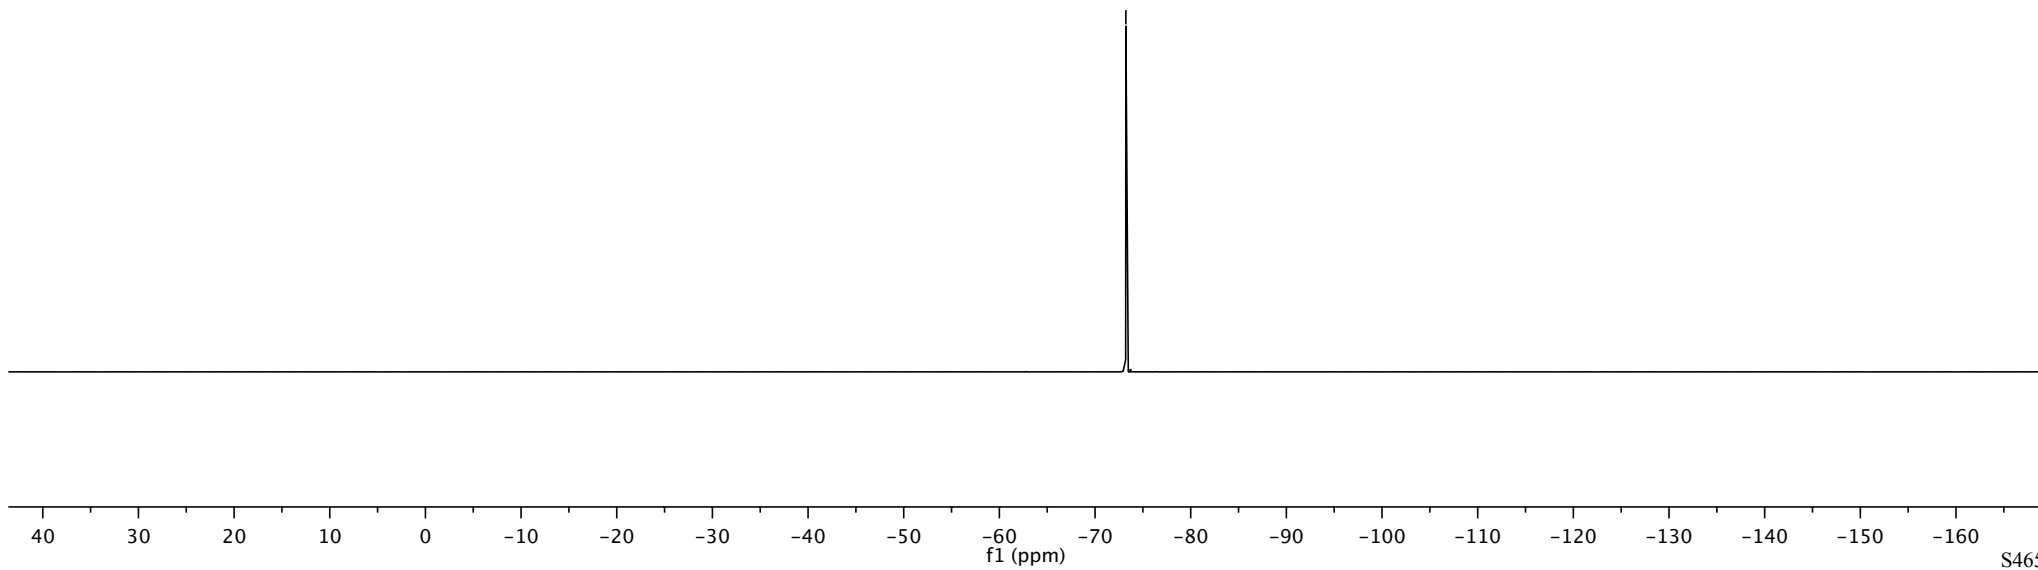

| Parameter              | Value           |
|------------------------|-----------------|
| Origin                 | Varian          |
| Spectrometer           | inova           |
| Solvent                | CDCl3           |
| Temperature            | 20.0            |
| Pulse Sequence         | s2pul           |
| Experiment             | 1D              |
| Probe                  | QUAD            |
| Number of Scans        | 1326            |
| Receiver Gain          | 60              |
| Relaxation Delay       | 2.0000          |
| Pulse Width            | 0.0000          |
| Acquisition Time       | 1.0863          |
| Spectrometer Frequency | 125.66          |
| Spectral Width         | 30165.9         |
| Lowest Frequency       | -1273.0         |
| Nucleus                | <sup>13</sup> C |
| Acquired Size          | 32768           |
| Spectral Size          | 65536           |

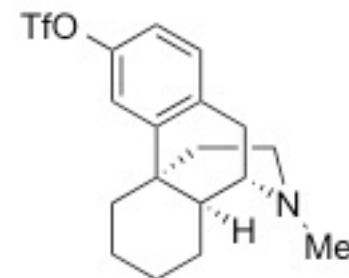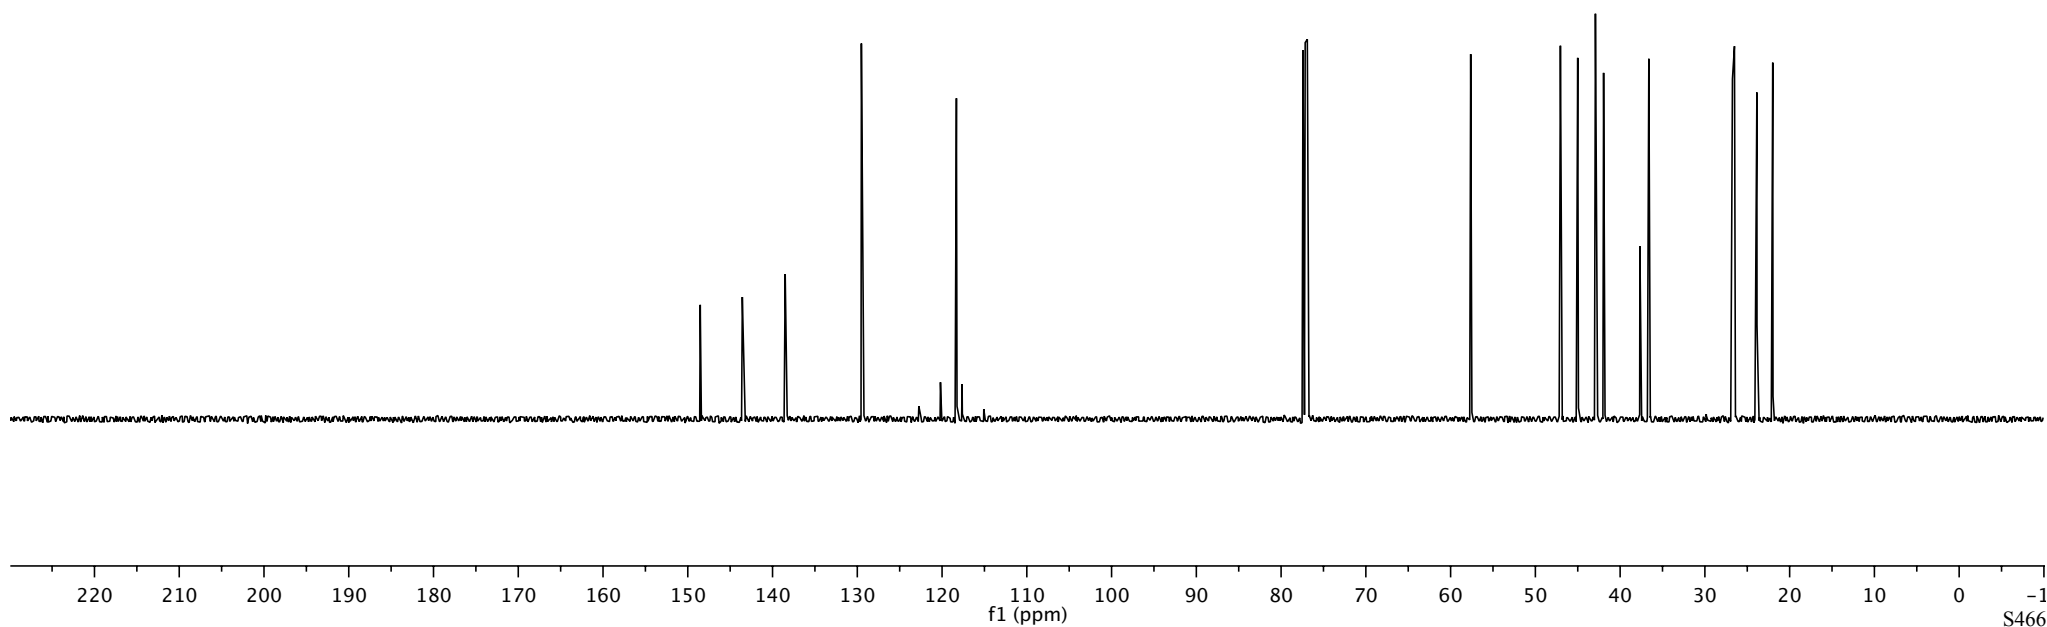

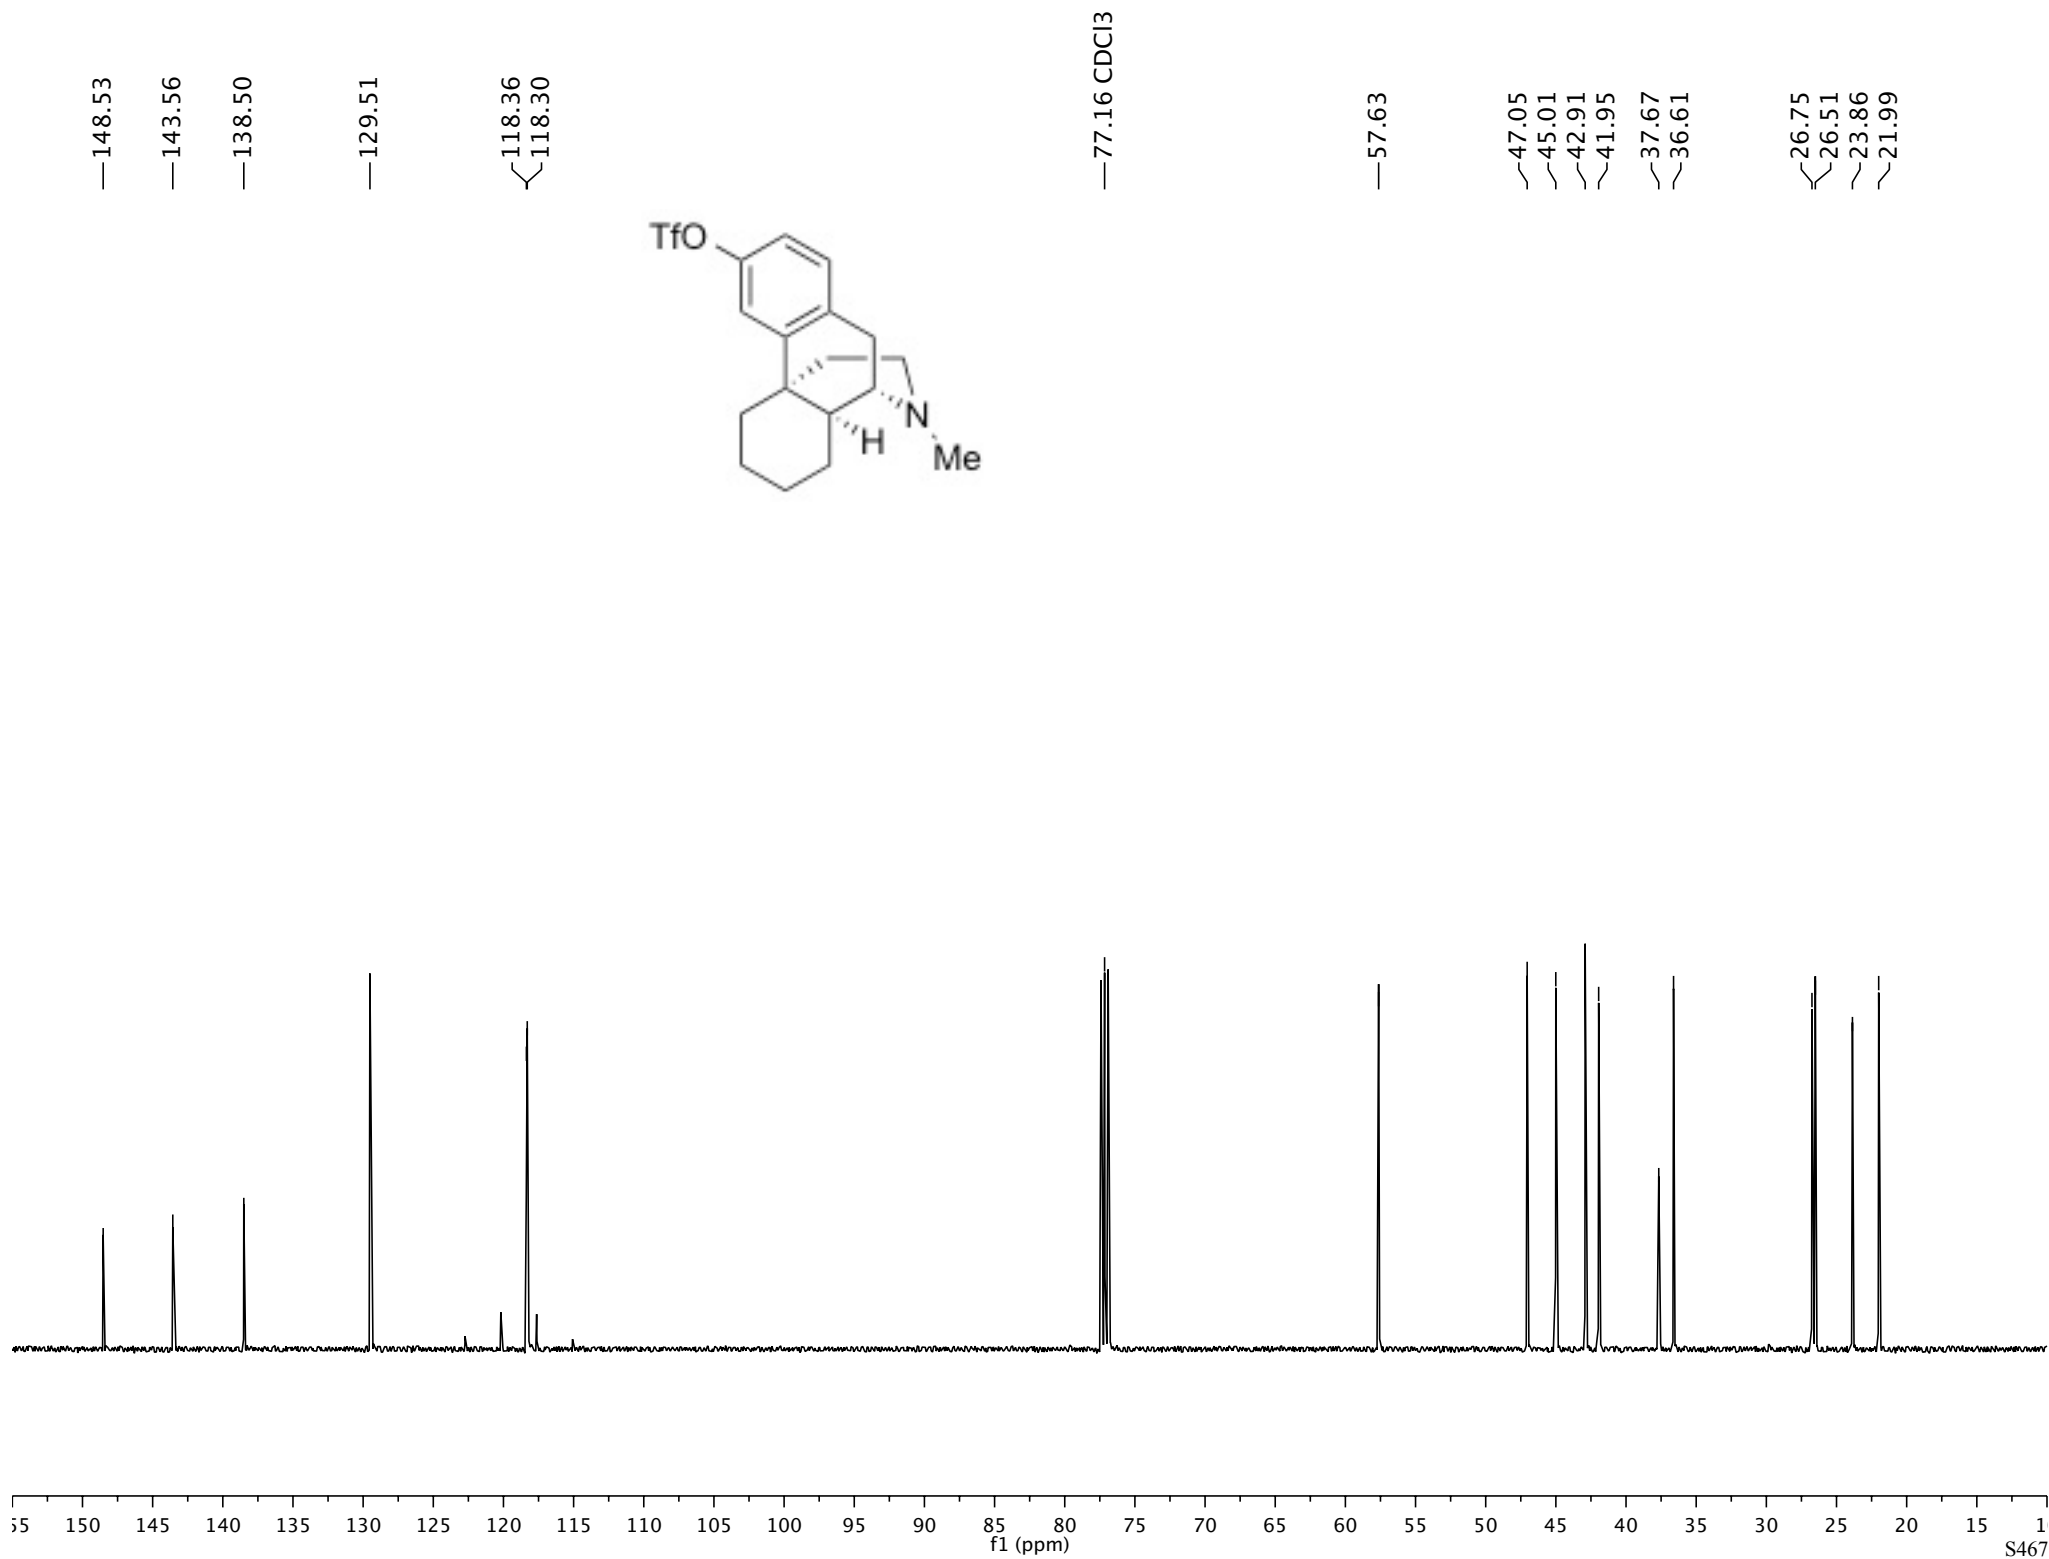

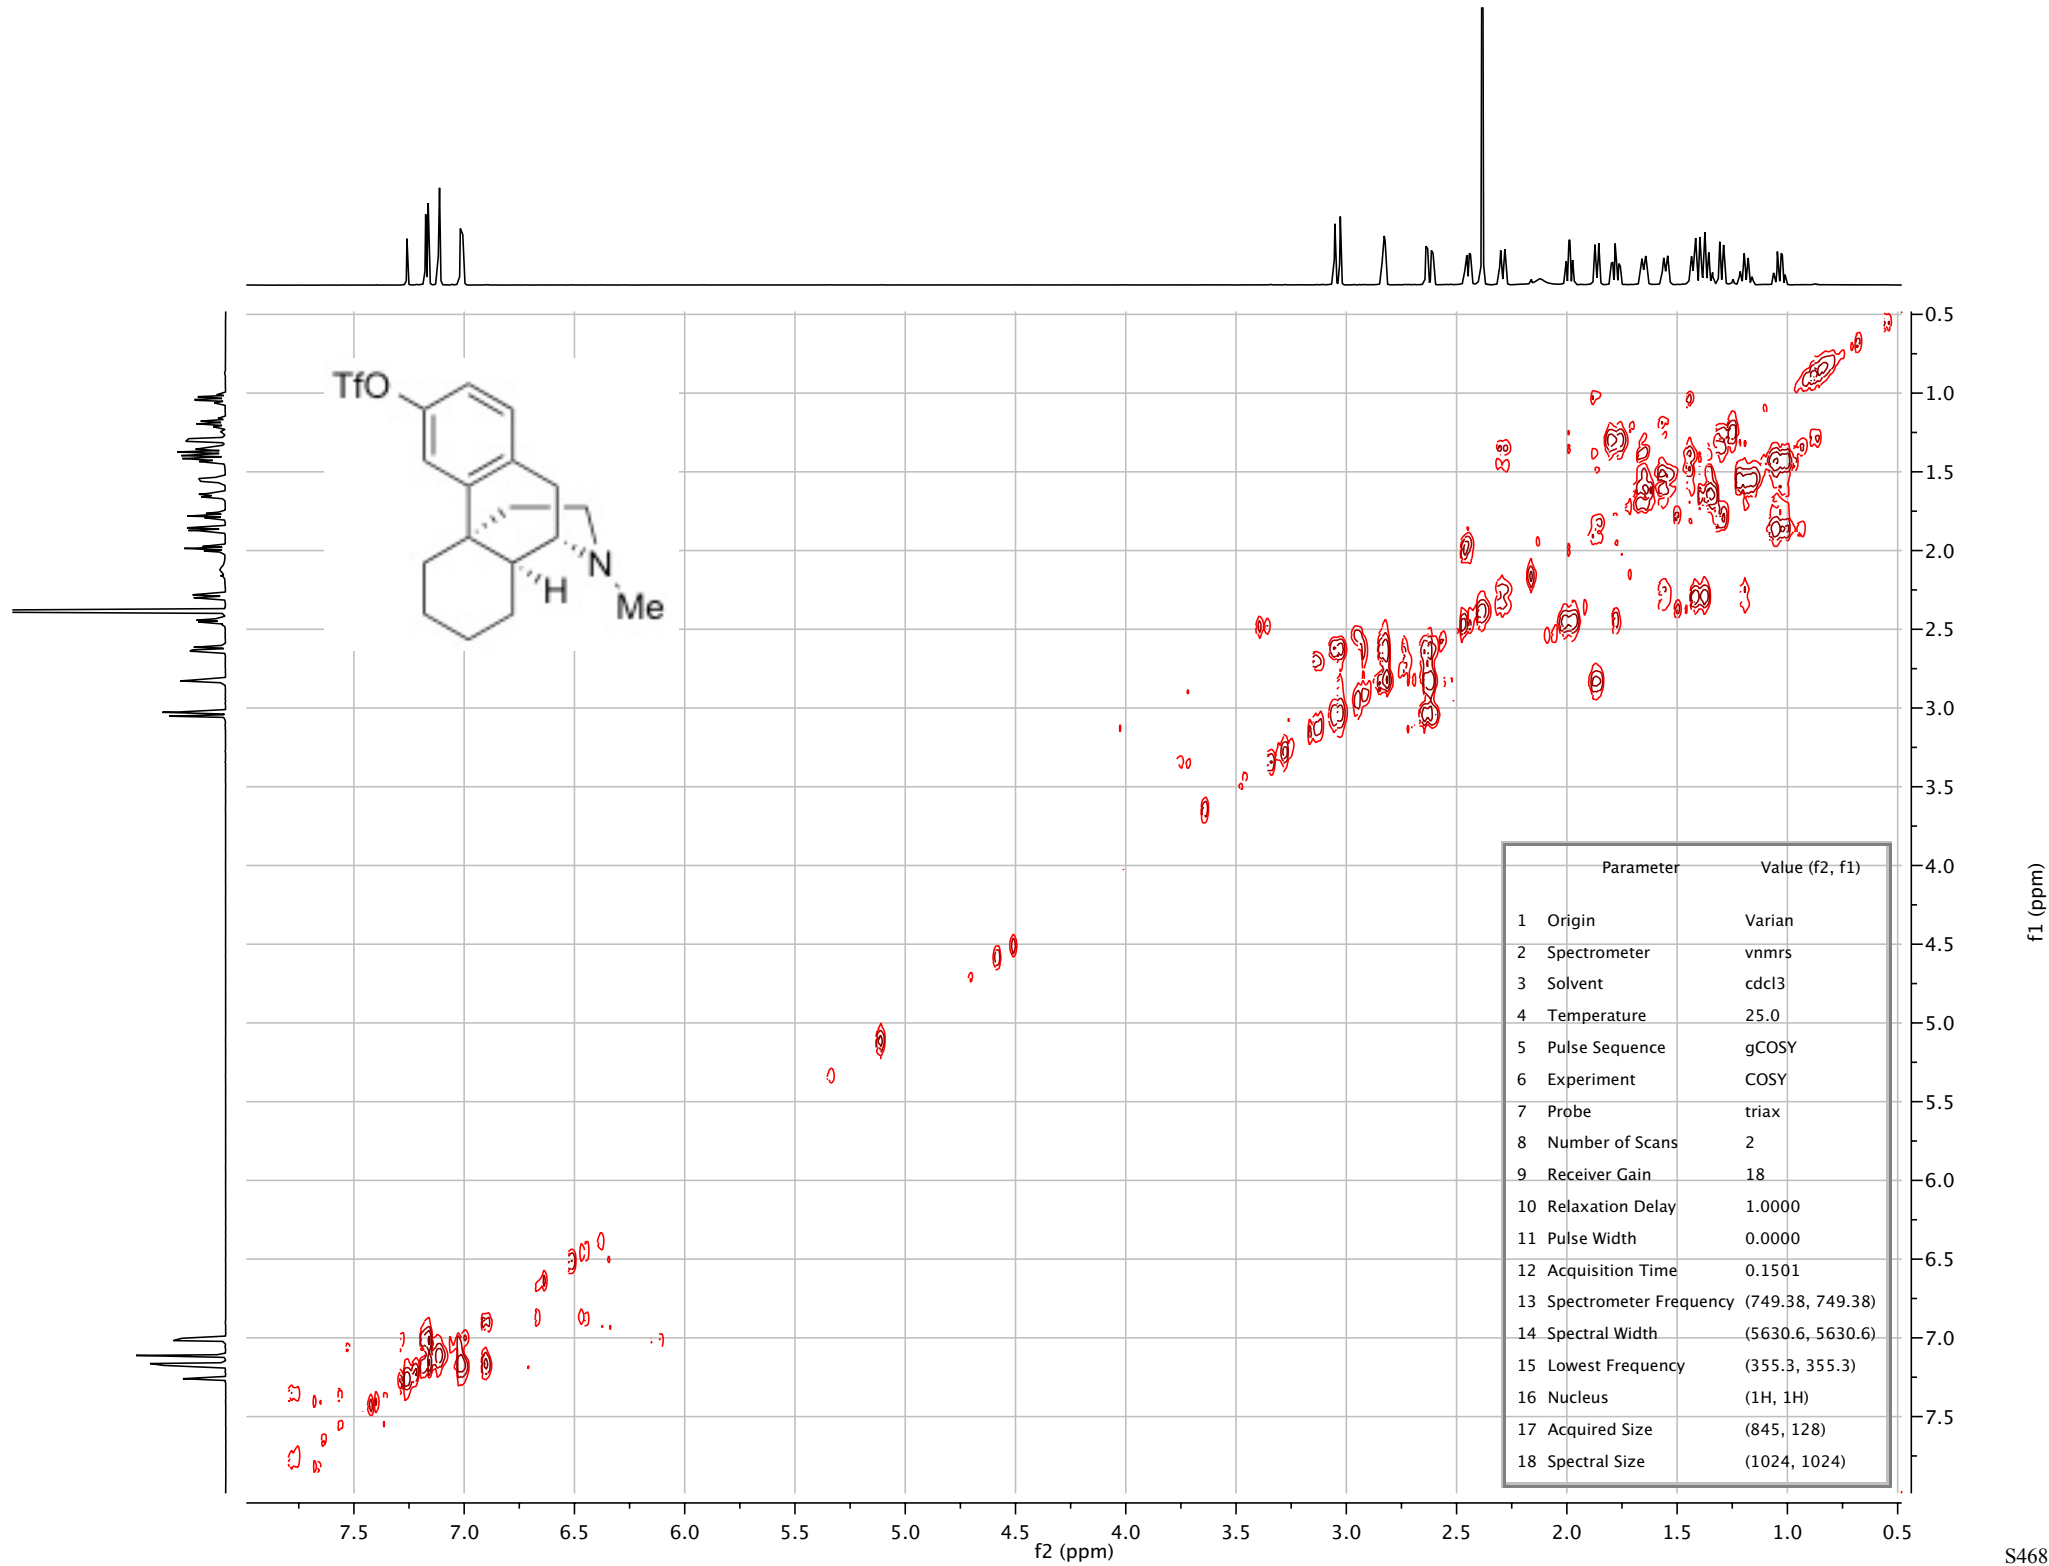

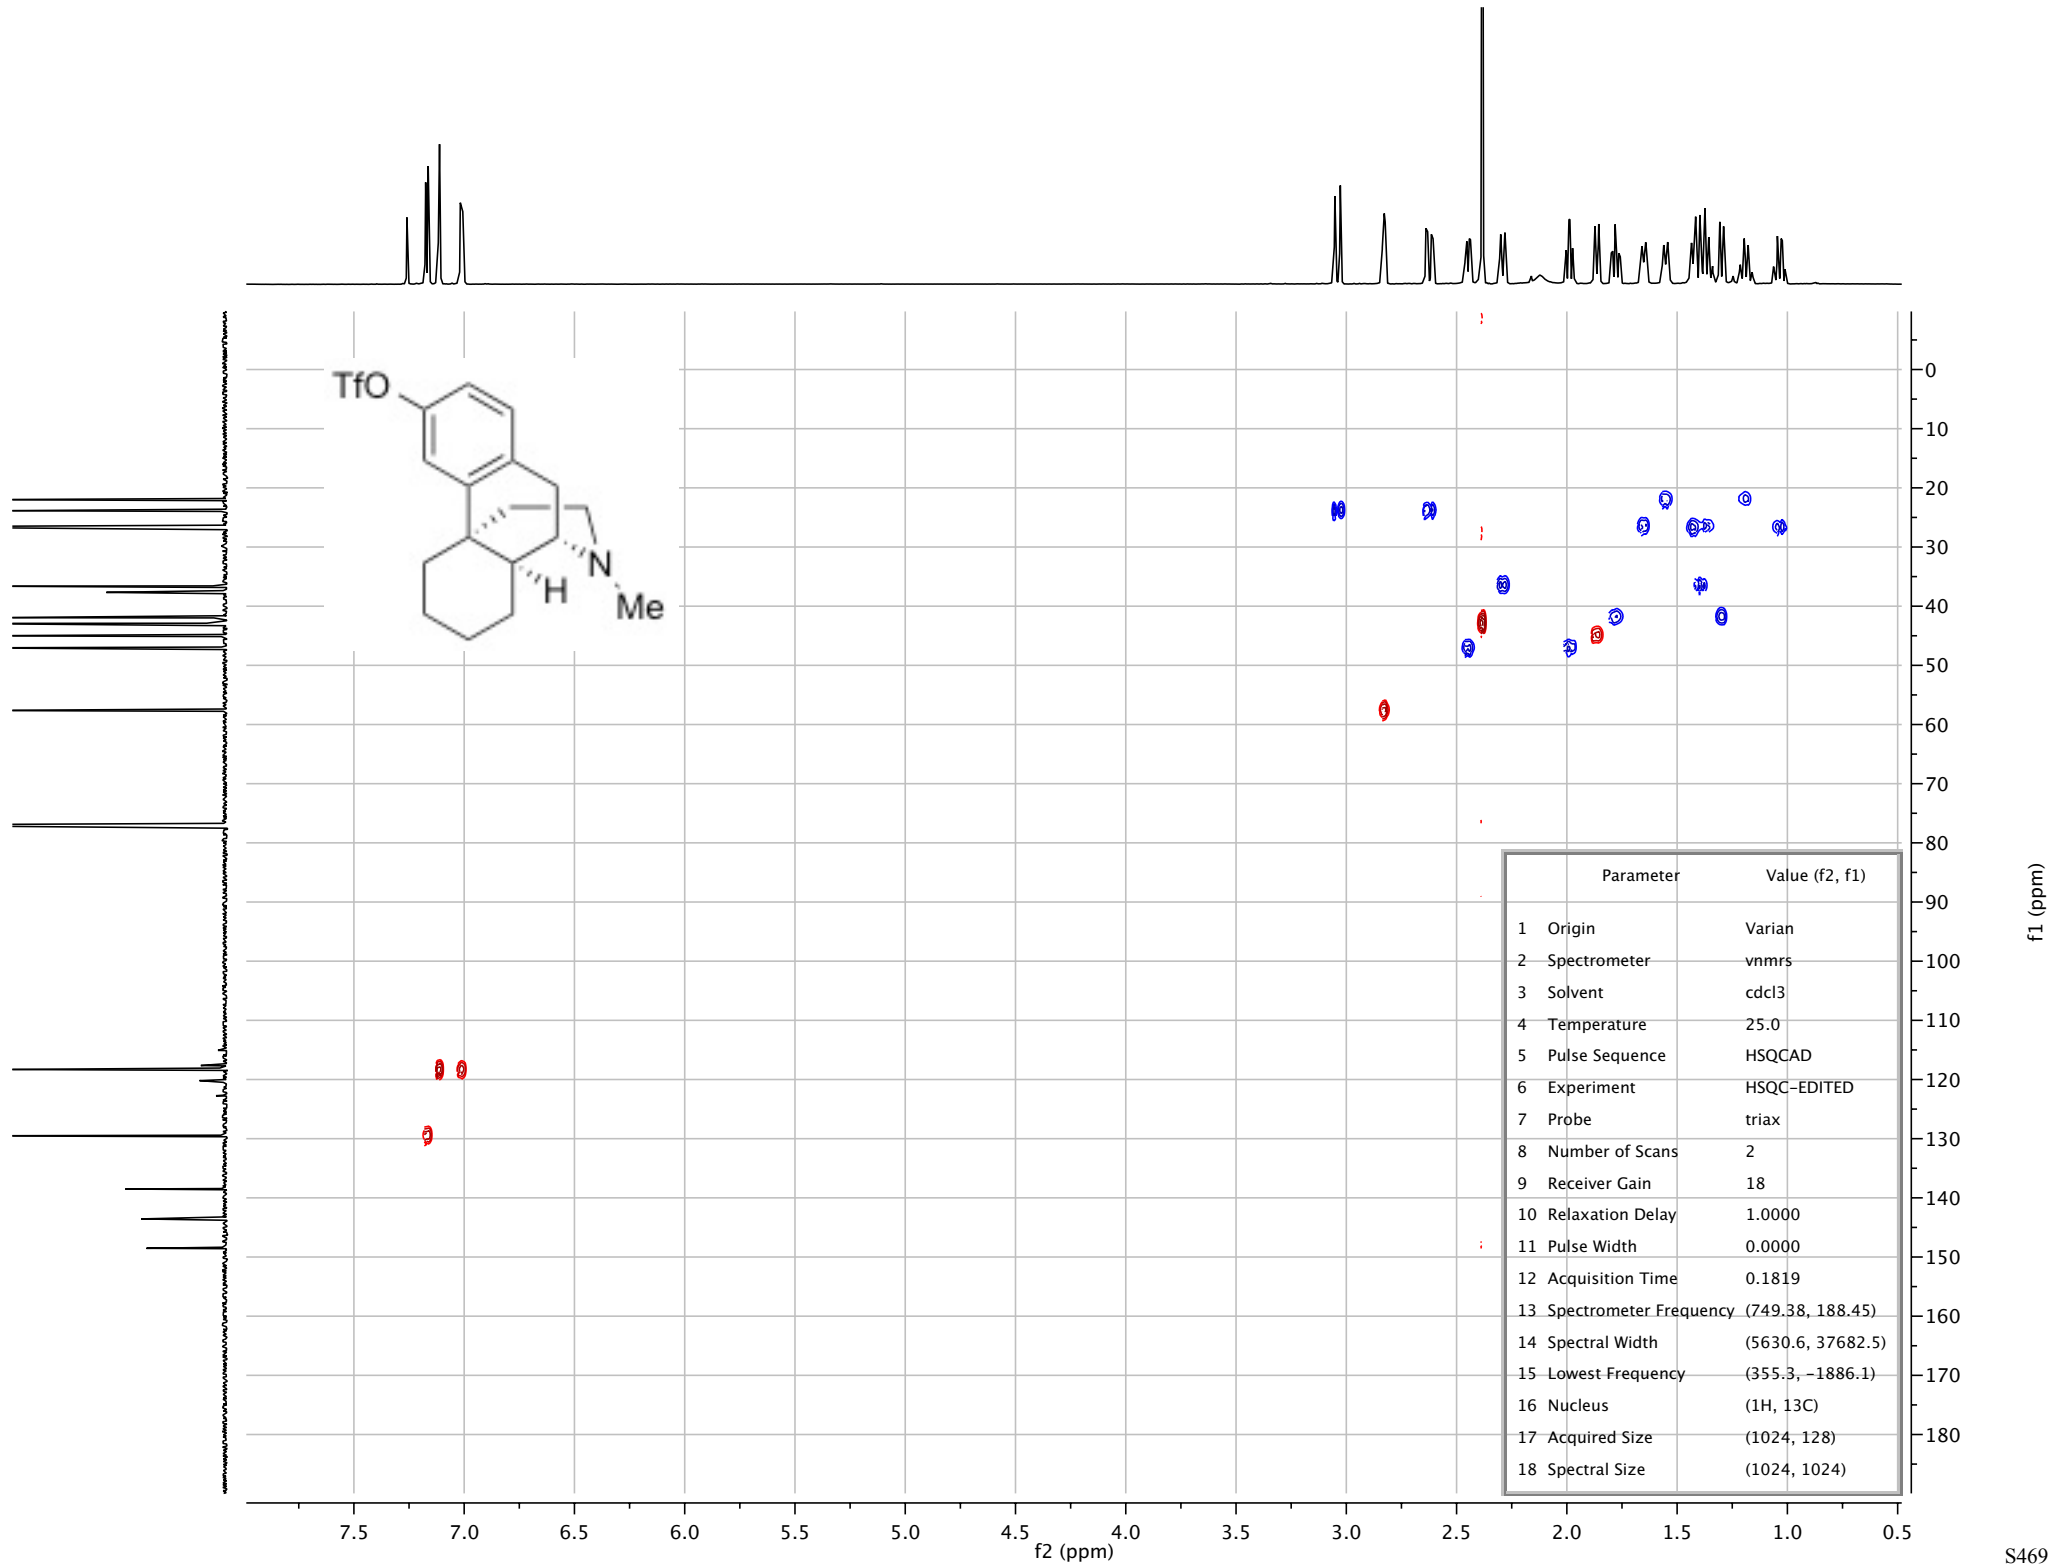

| Parameter              | Value          |
|------------------------|----------------|
| Origin                 | Varian         |
| Spectrometer           | vnmrs          |
| Solvent                | cdcl3          |
| Temperature            | 25.0           |
| Pulse Sequence         | s2pul          |
| Experiment             | 1D             |
| Probe                  | triax          |
| Number of Scans        | 16             |
| Receiver Gain          | 32             |
| Relaxation Delay       | 15.0000        |
| Pulse Width            | 0.0000         |
| Acquisition Time       | 2.9098         |
| Spectrometer Frequency | 749.38         |
| Spectral Width         | 5630.6         |
| Lowest Frequency       | 356.1          |
| Nucleus                | <sup>1</sup> H |
| Acquired Size          | 16384          |
| Spectral Size          | 65536          |

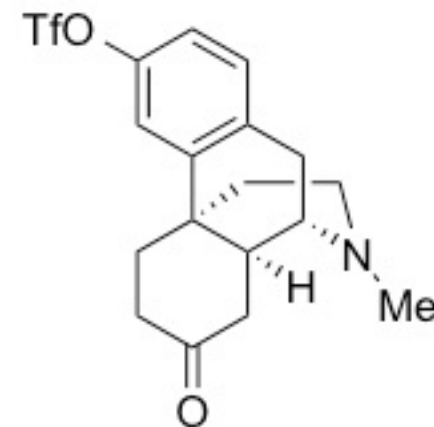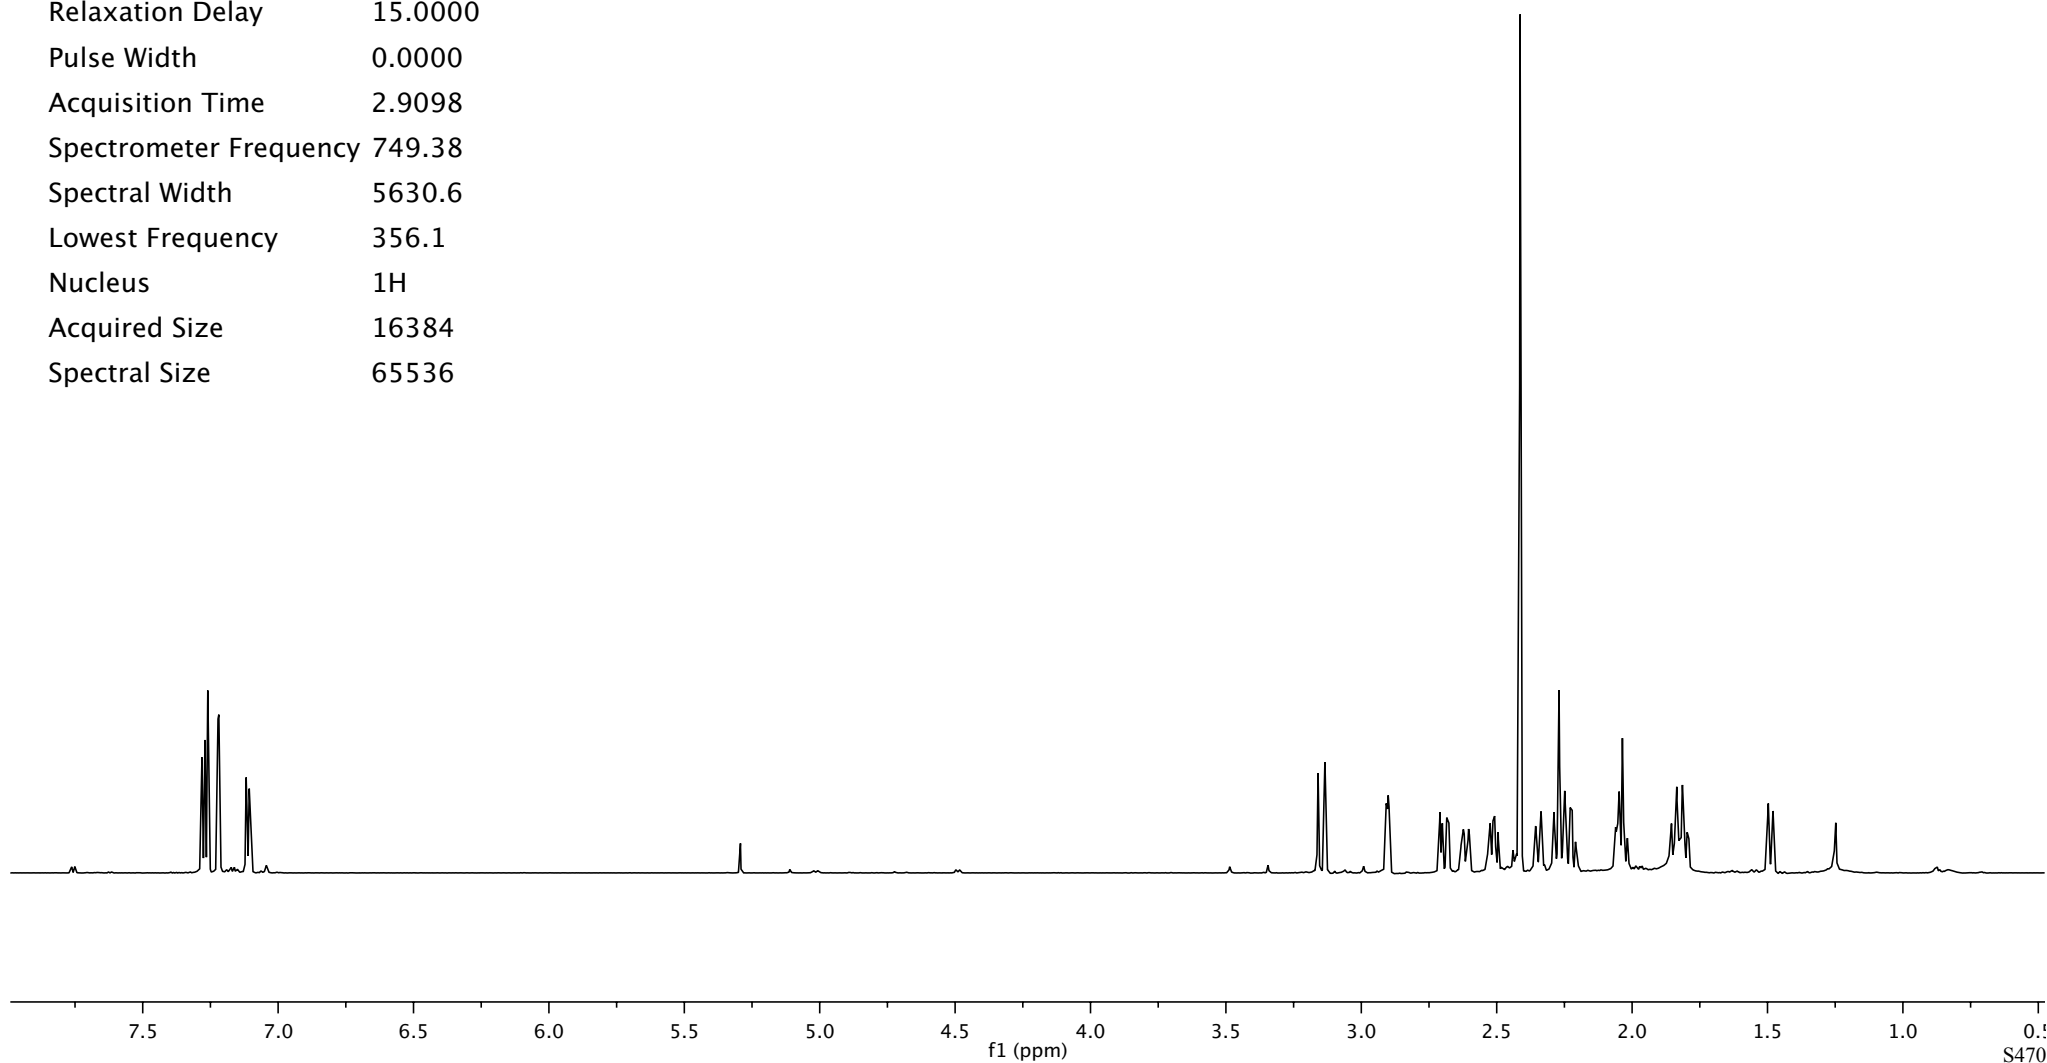

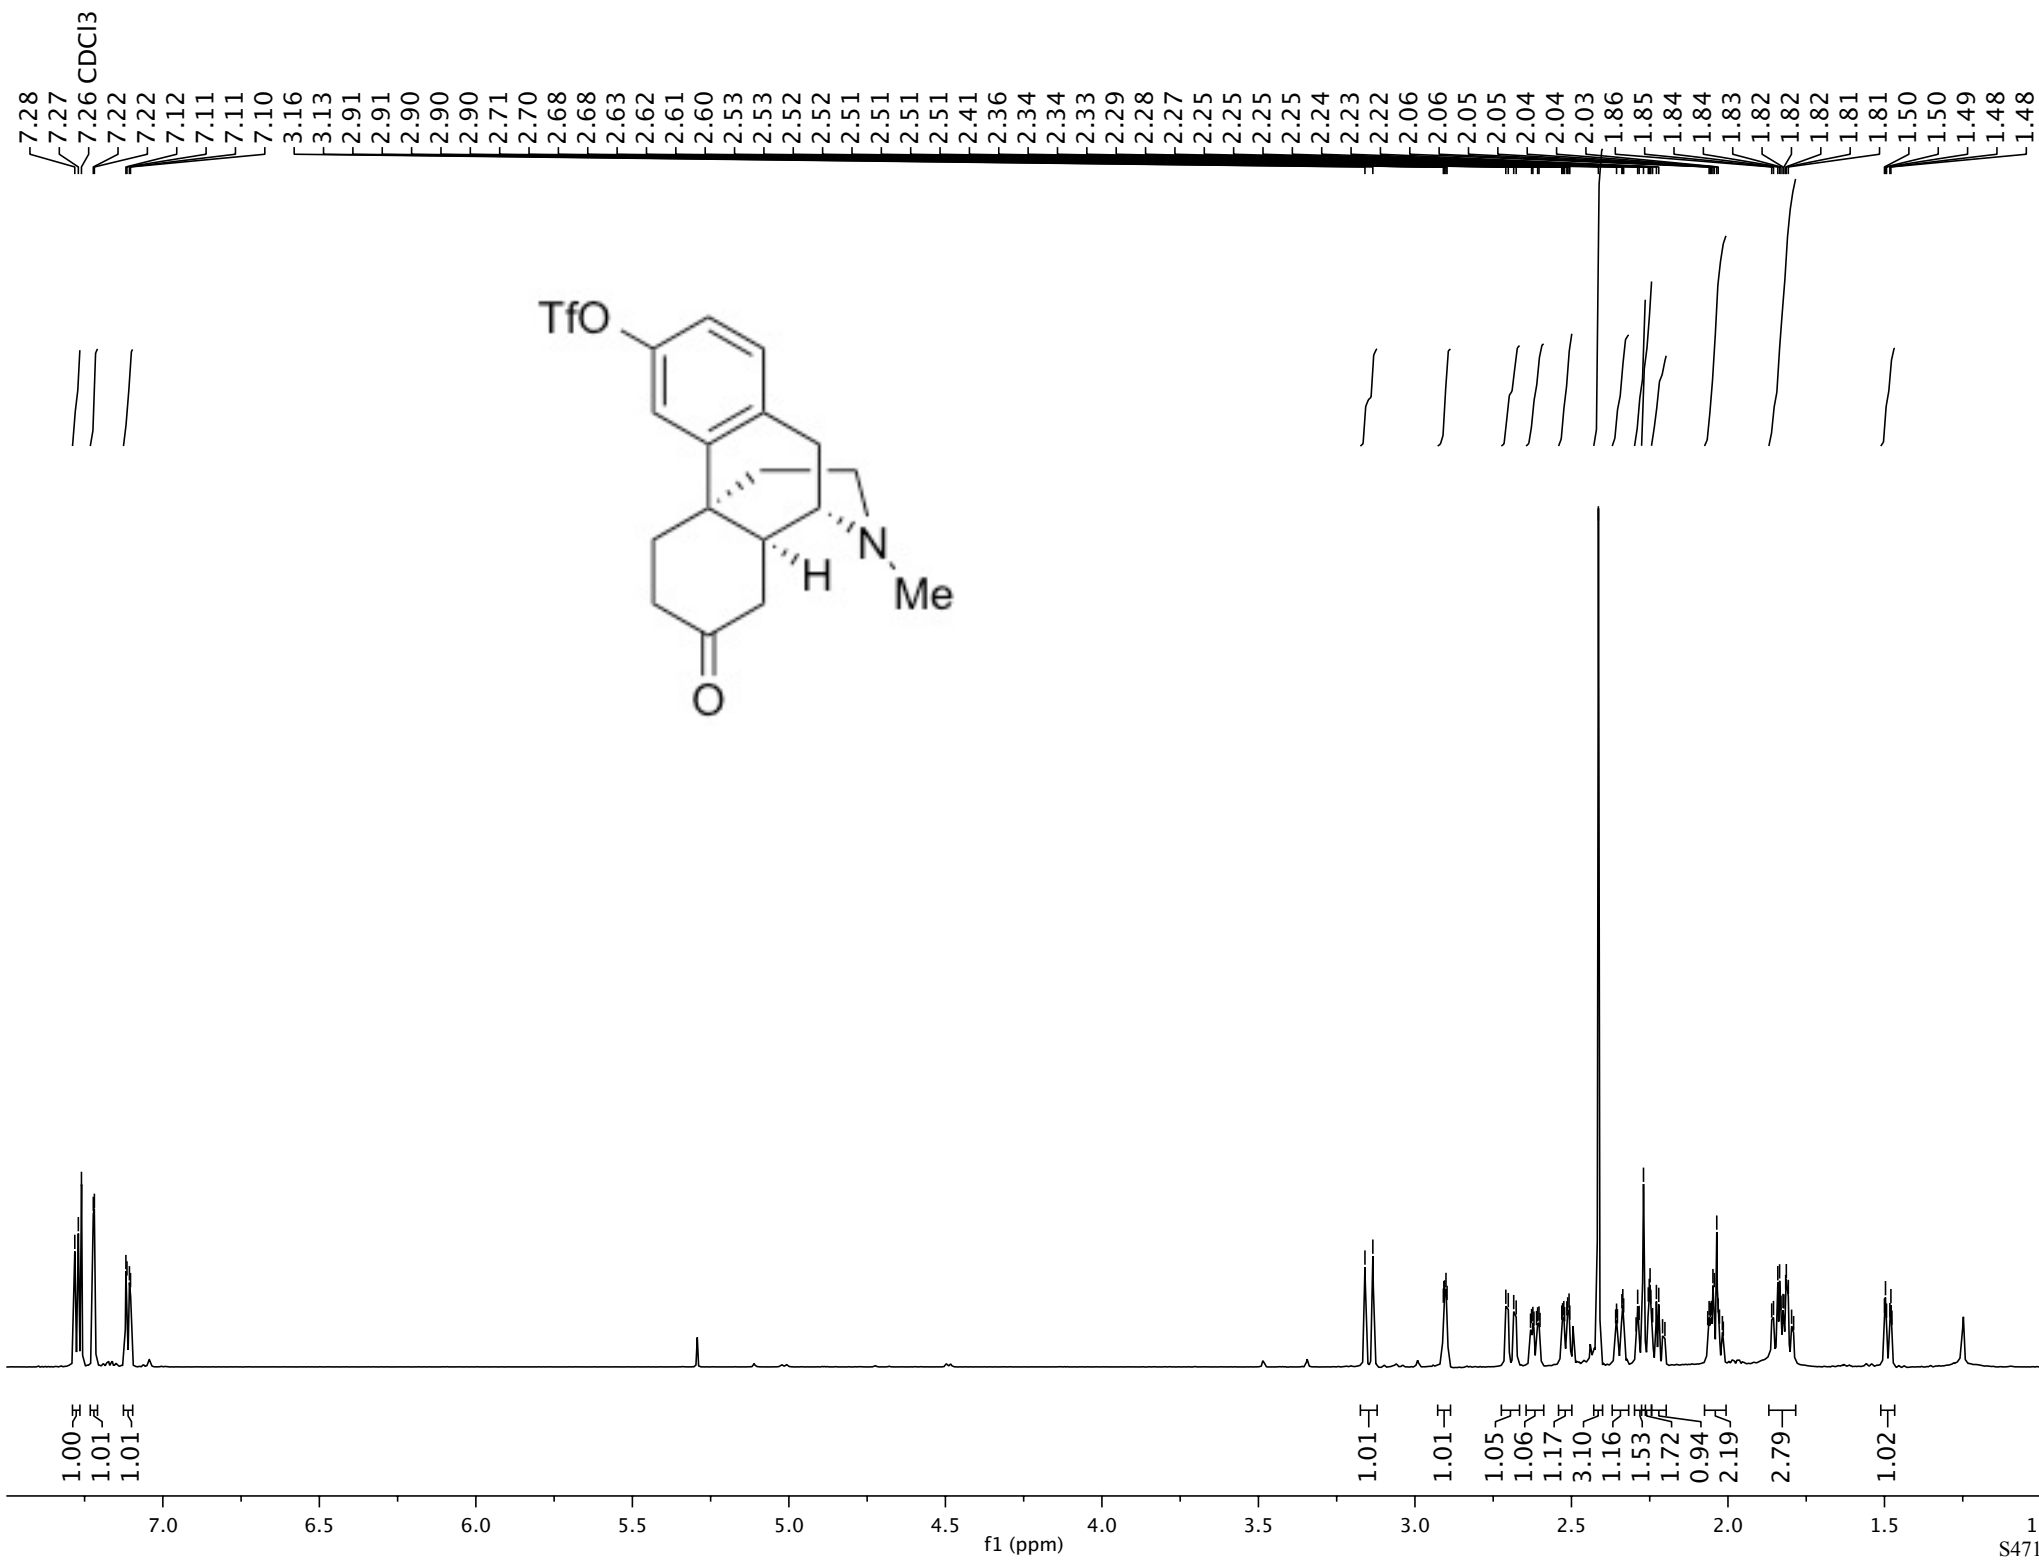



| Parameter              | Value    |
|------------------------|----------|
| Origin                 | Varian   |
| Spectrometer           | inova    |
| Solvent                | CDCl3    |
| Temperature            | 20.0     |
| Pulse Sequence         | s2pul    |
| Experiment             | 1D       |
| Probe                  | QUAD     |
| Number of Scans        | 128      |
| Receiver Gain          | 60       |
| Relaxation Delay       | 0.0000   |
| Pulse Width            | 0.0000   |
| Acquisition Time       | 0.3277   |
| Spectrometer Frequency | 470.15   |
| Spectral Width         | 100000.0 |
| Lowest Frequency       | -79501.3 |
| Nucleus                | 19F      |
| Acquired Size          | 32768    |
| Spectral Size          | 65536    |

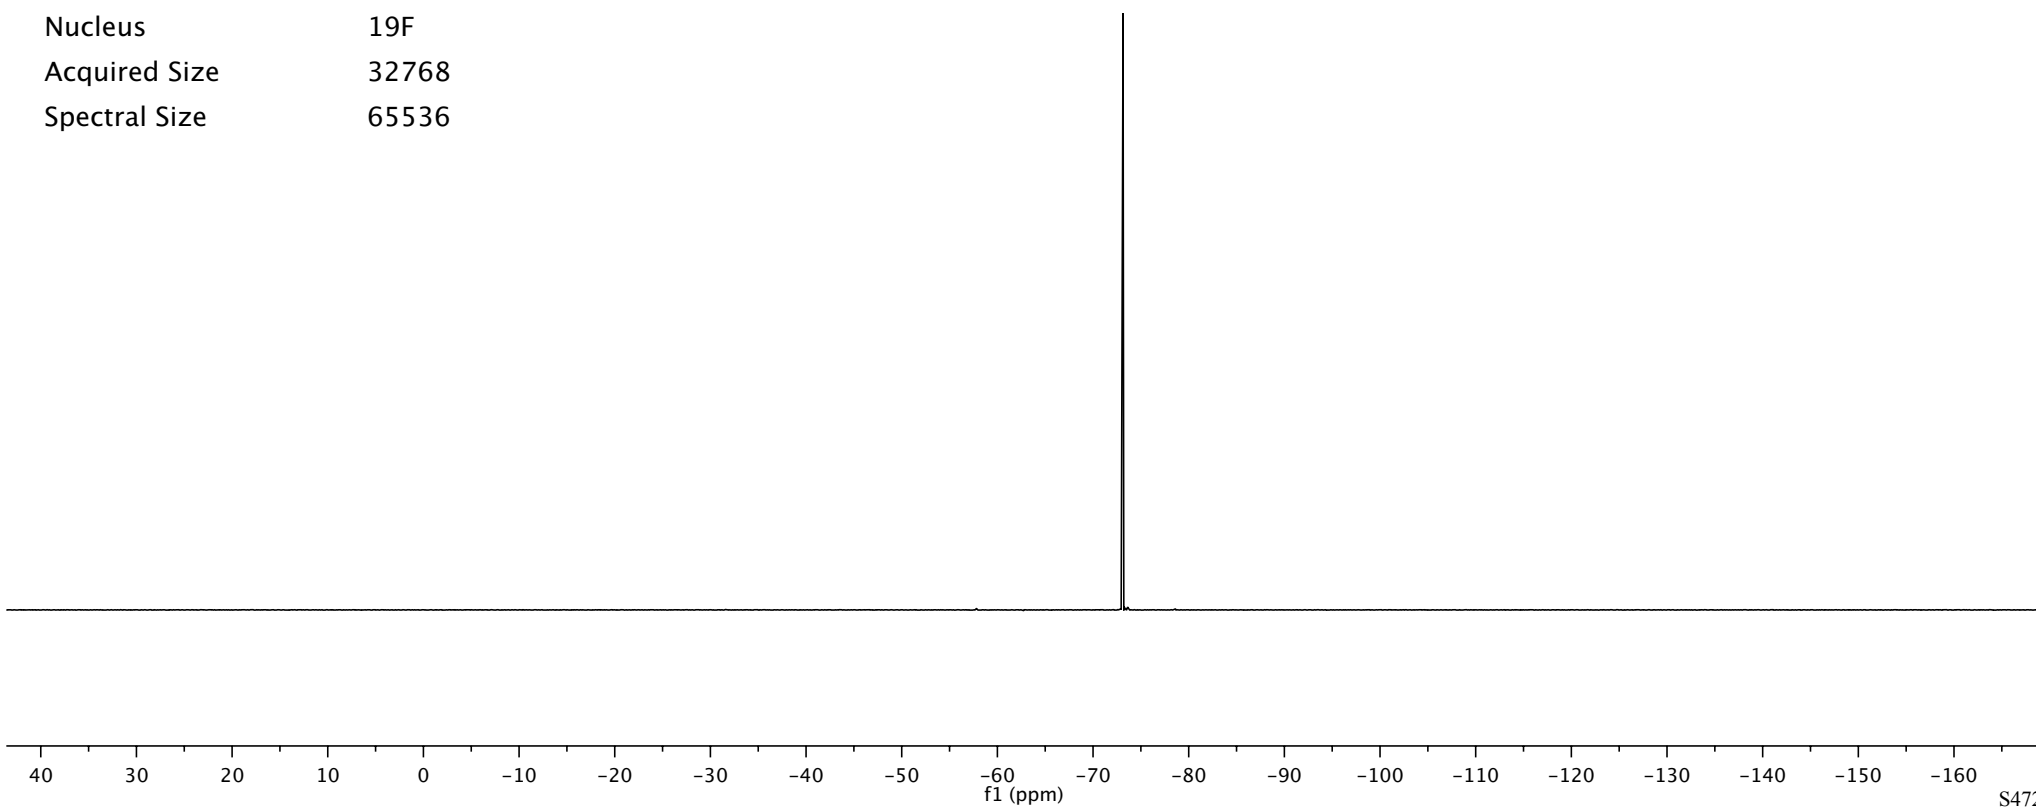

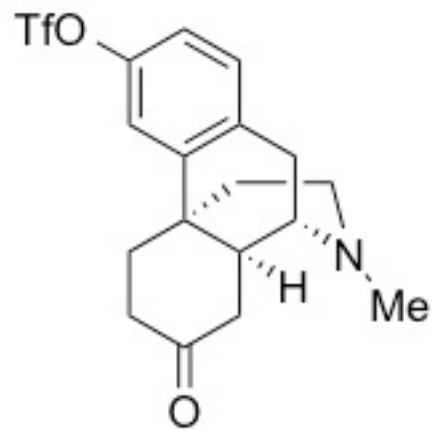

--73.14

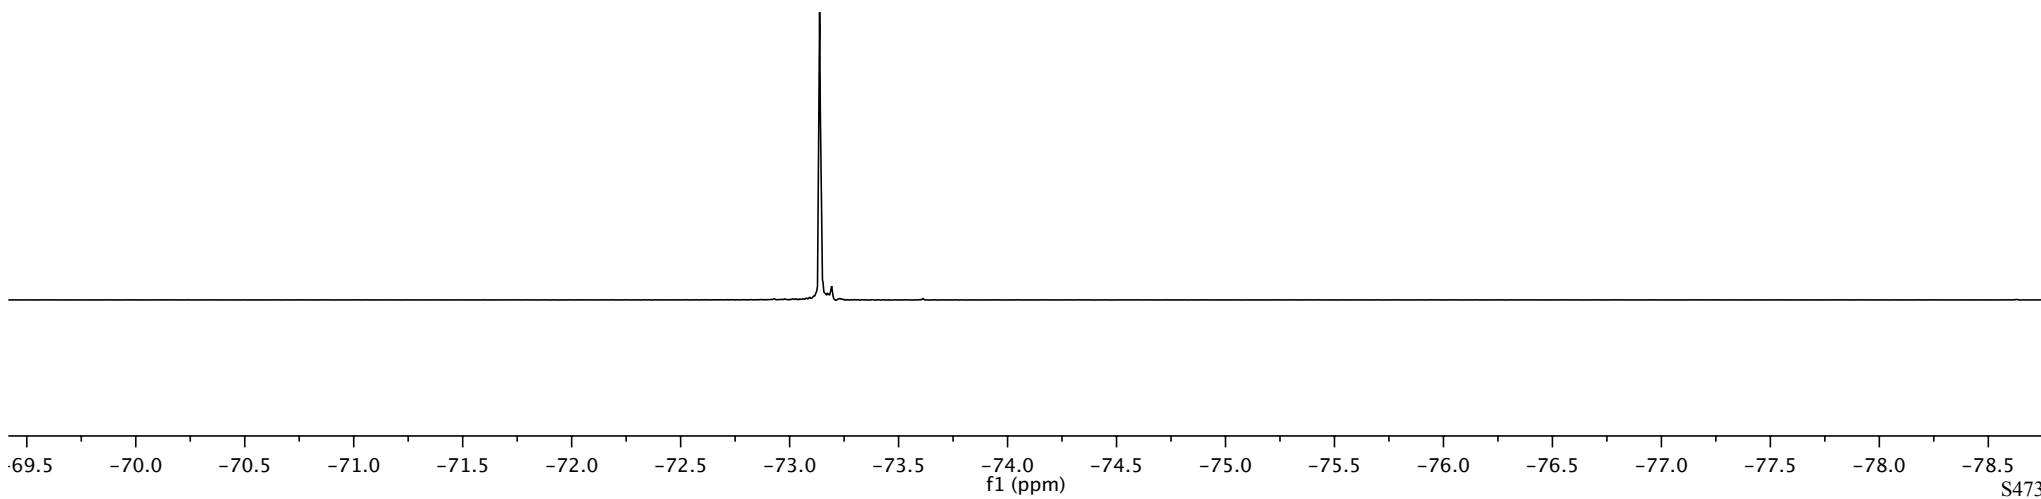

JMH-V-141C.1\_13C  
8.14.2015  
JMH-V-141C.1

| Parameter              | Value   |
|------------------------|---------|
| Origin                 | Varian  |
| Spectrometer           | inova   |
| Solvent                | CDCl3   |
| Temperature            | 20.0    |
| Pulse Sequence         | s2pul   |
| Experiment             | 1D      |
| Probe                  | QUAD    |
| Number of Scans        | 2322    |
| Receiver Gain          | 60      |
| Relaxation Delay       | 2.0000  |
| Pulse Width            | 0.0000  |
| Acquisition Time       | 1.0863  |
| Spectrometer Frequency | 125.66  |
| Spectral Width         | 30165.9 |
| Lowest Frequency       | -1273.3 |
| Nucleus                | 13C     |
| Acquired Size          | 32768   |
| Spectral Size          | 65536   |

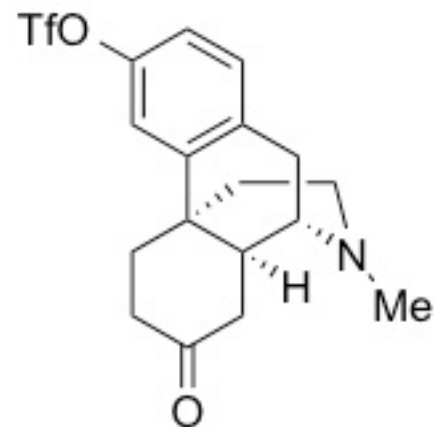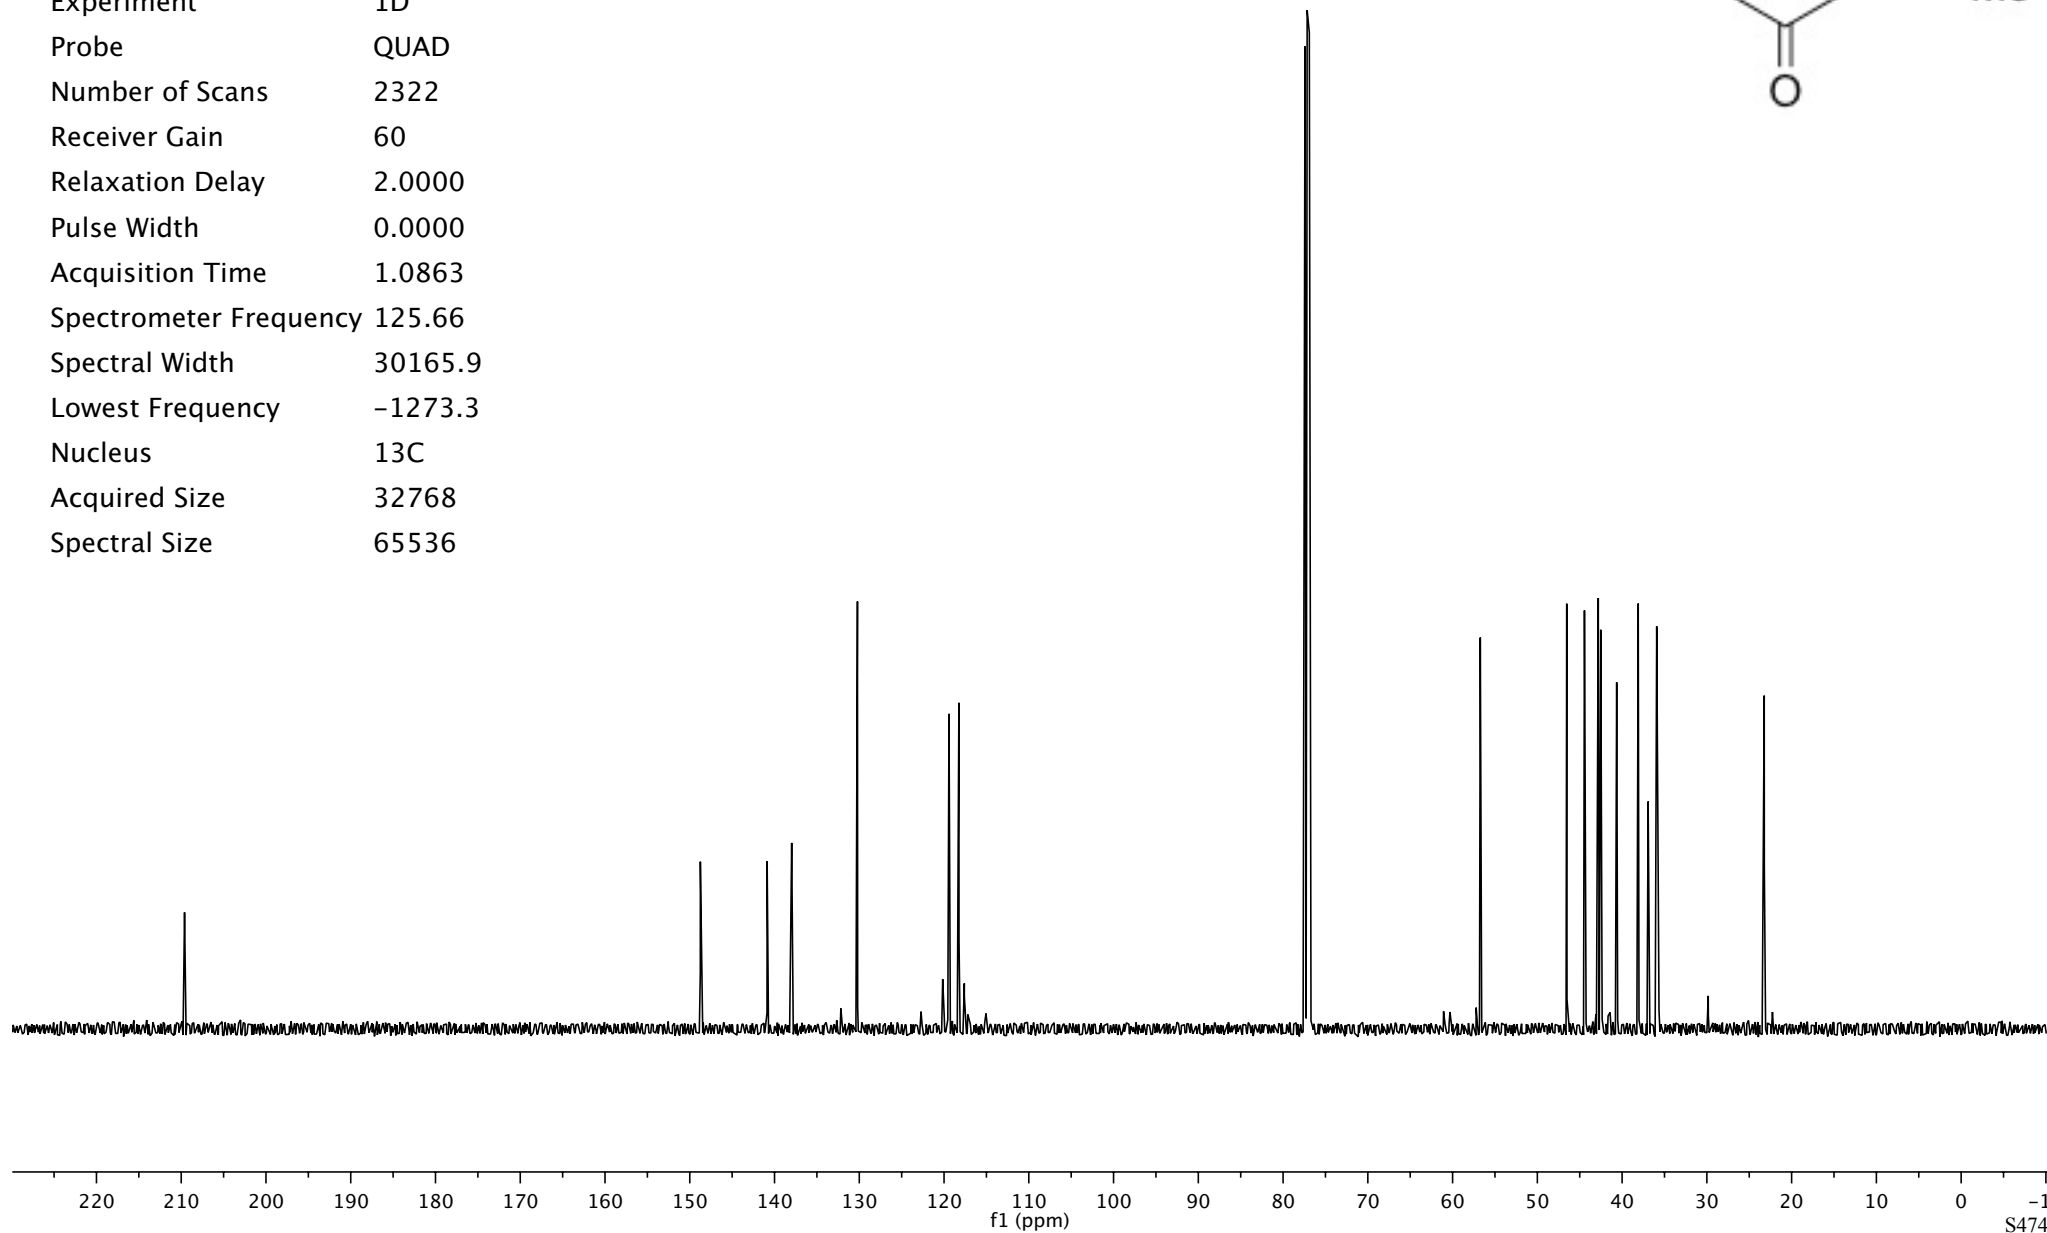

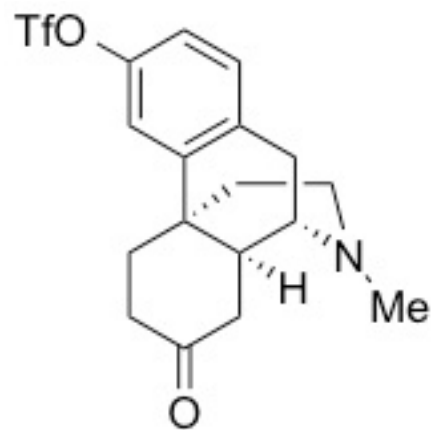

—209.61

—148.75

—140.87

—137.98

—130.22

—122.71

—120.16

—119.42

—118.25

—117.61

—115.05

—77.16 CDCl<sub>3</sub>

—56.73

—46.53

—44.44

—42.81

—42.52

—40.64

—38.10

—36.93

—35.92

—23.23

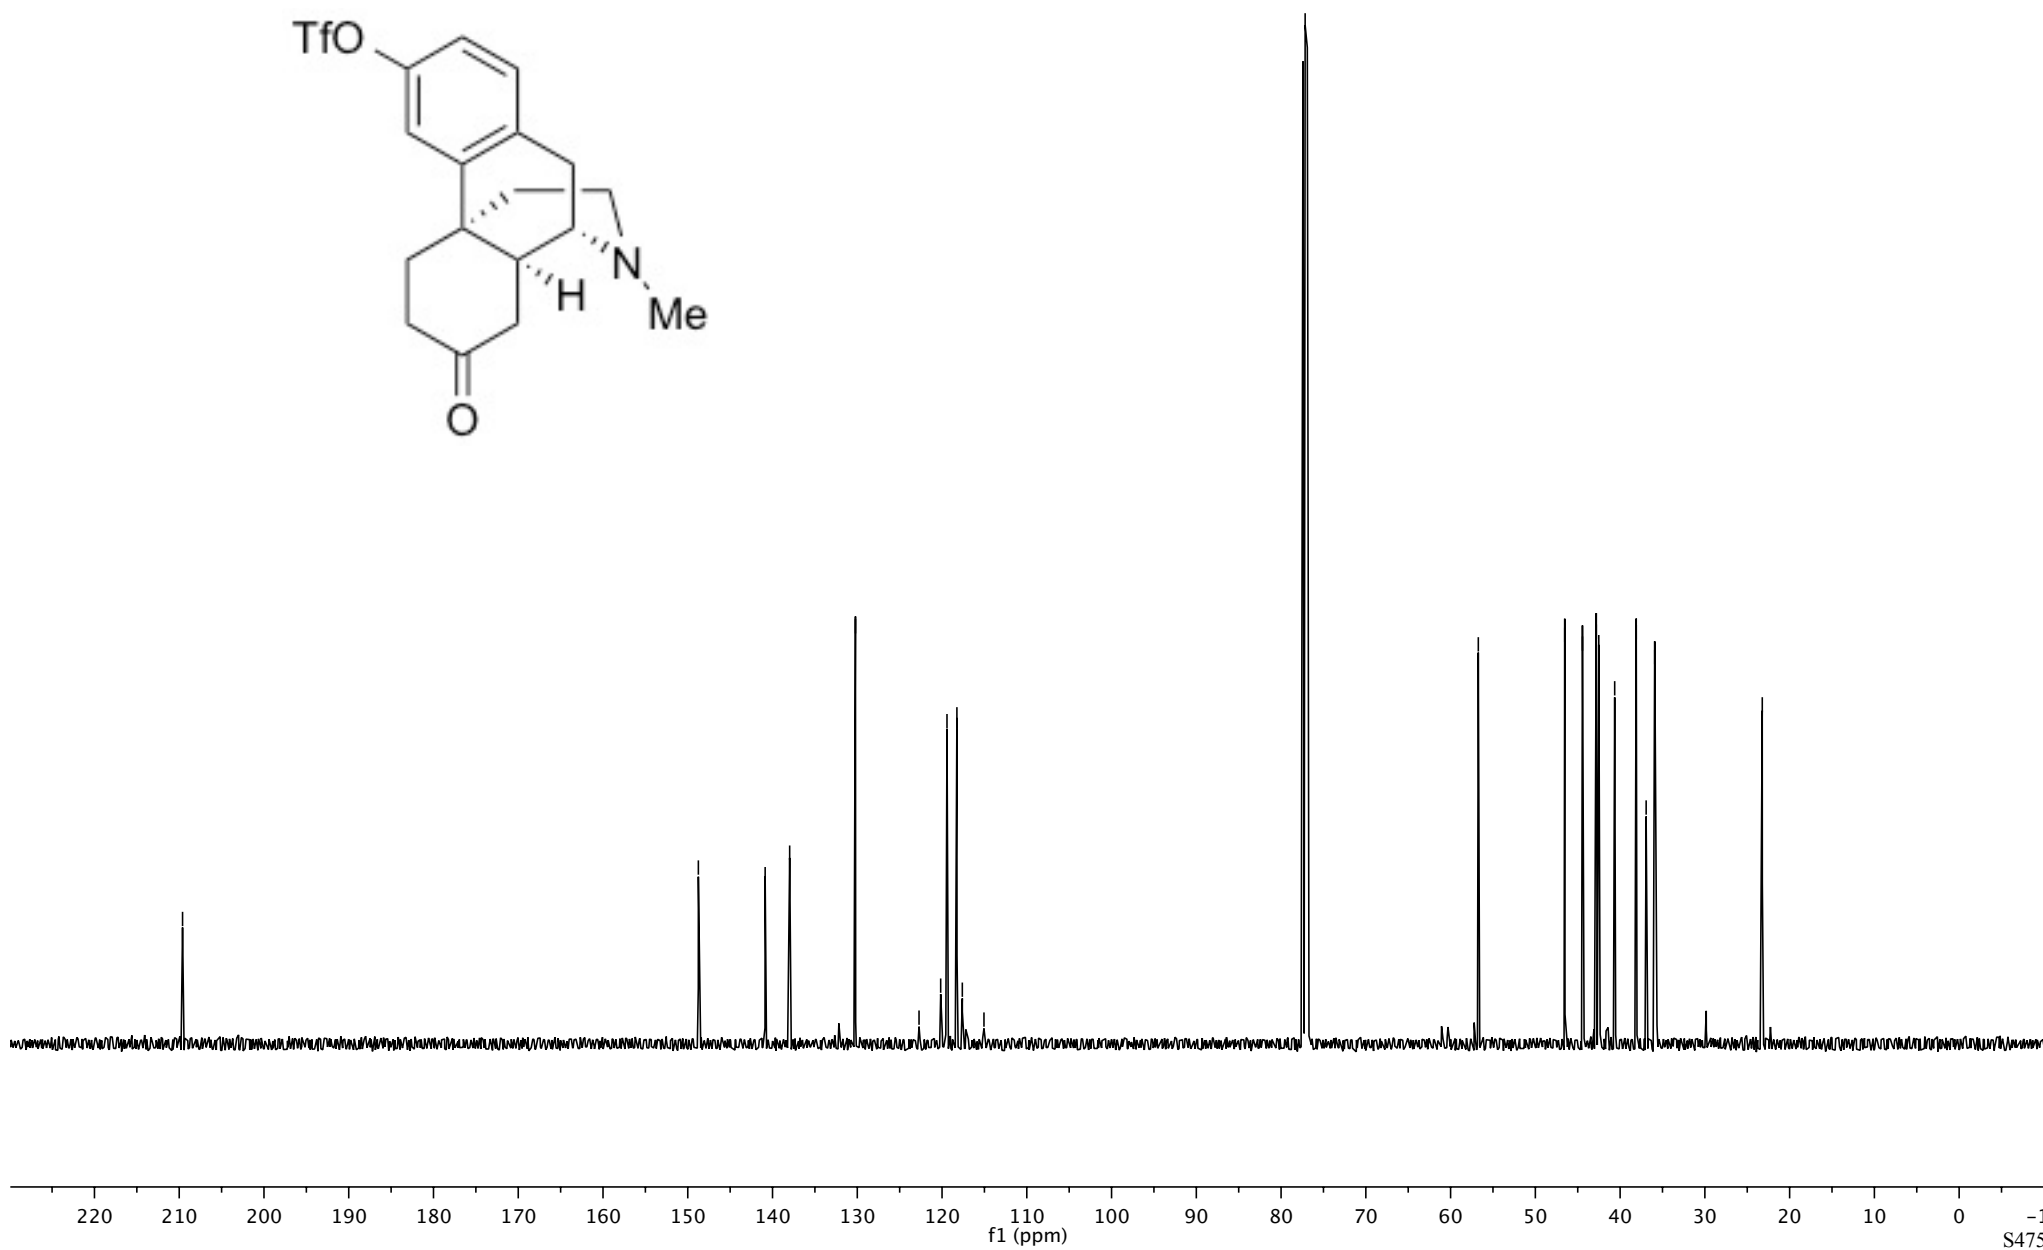

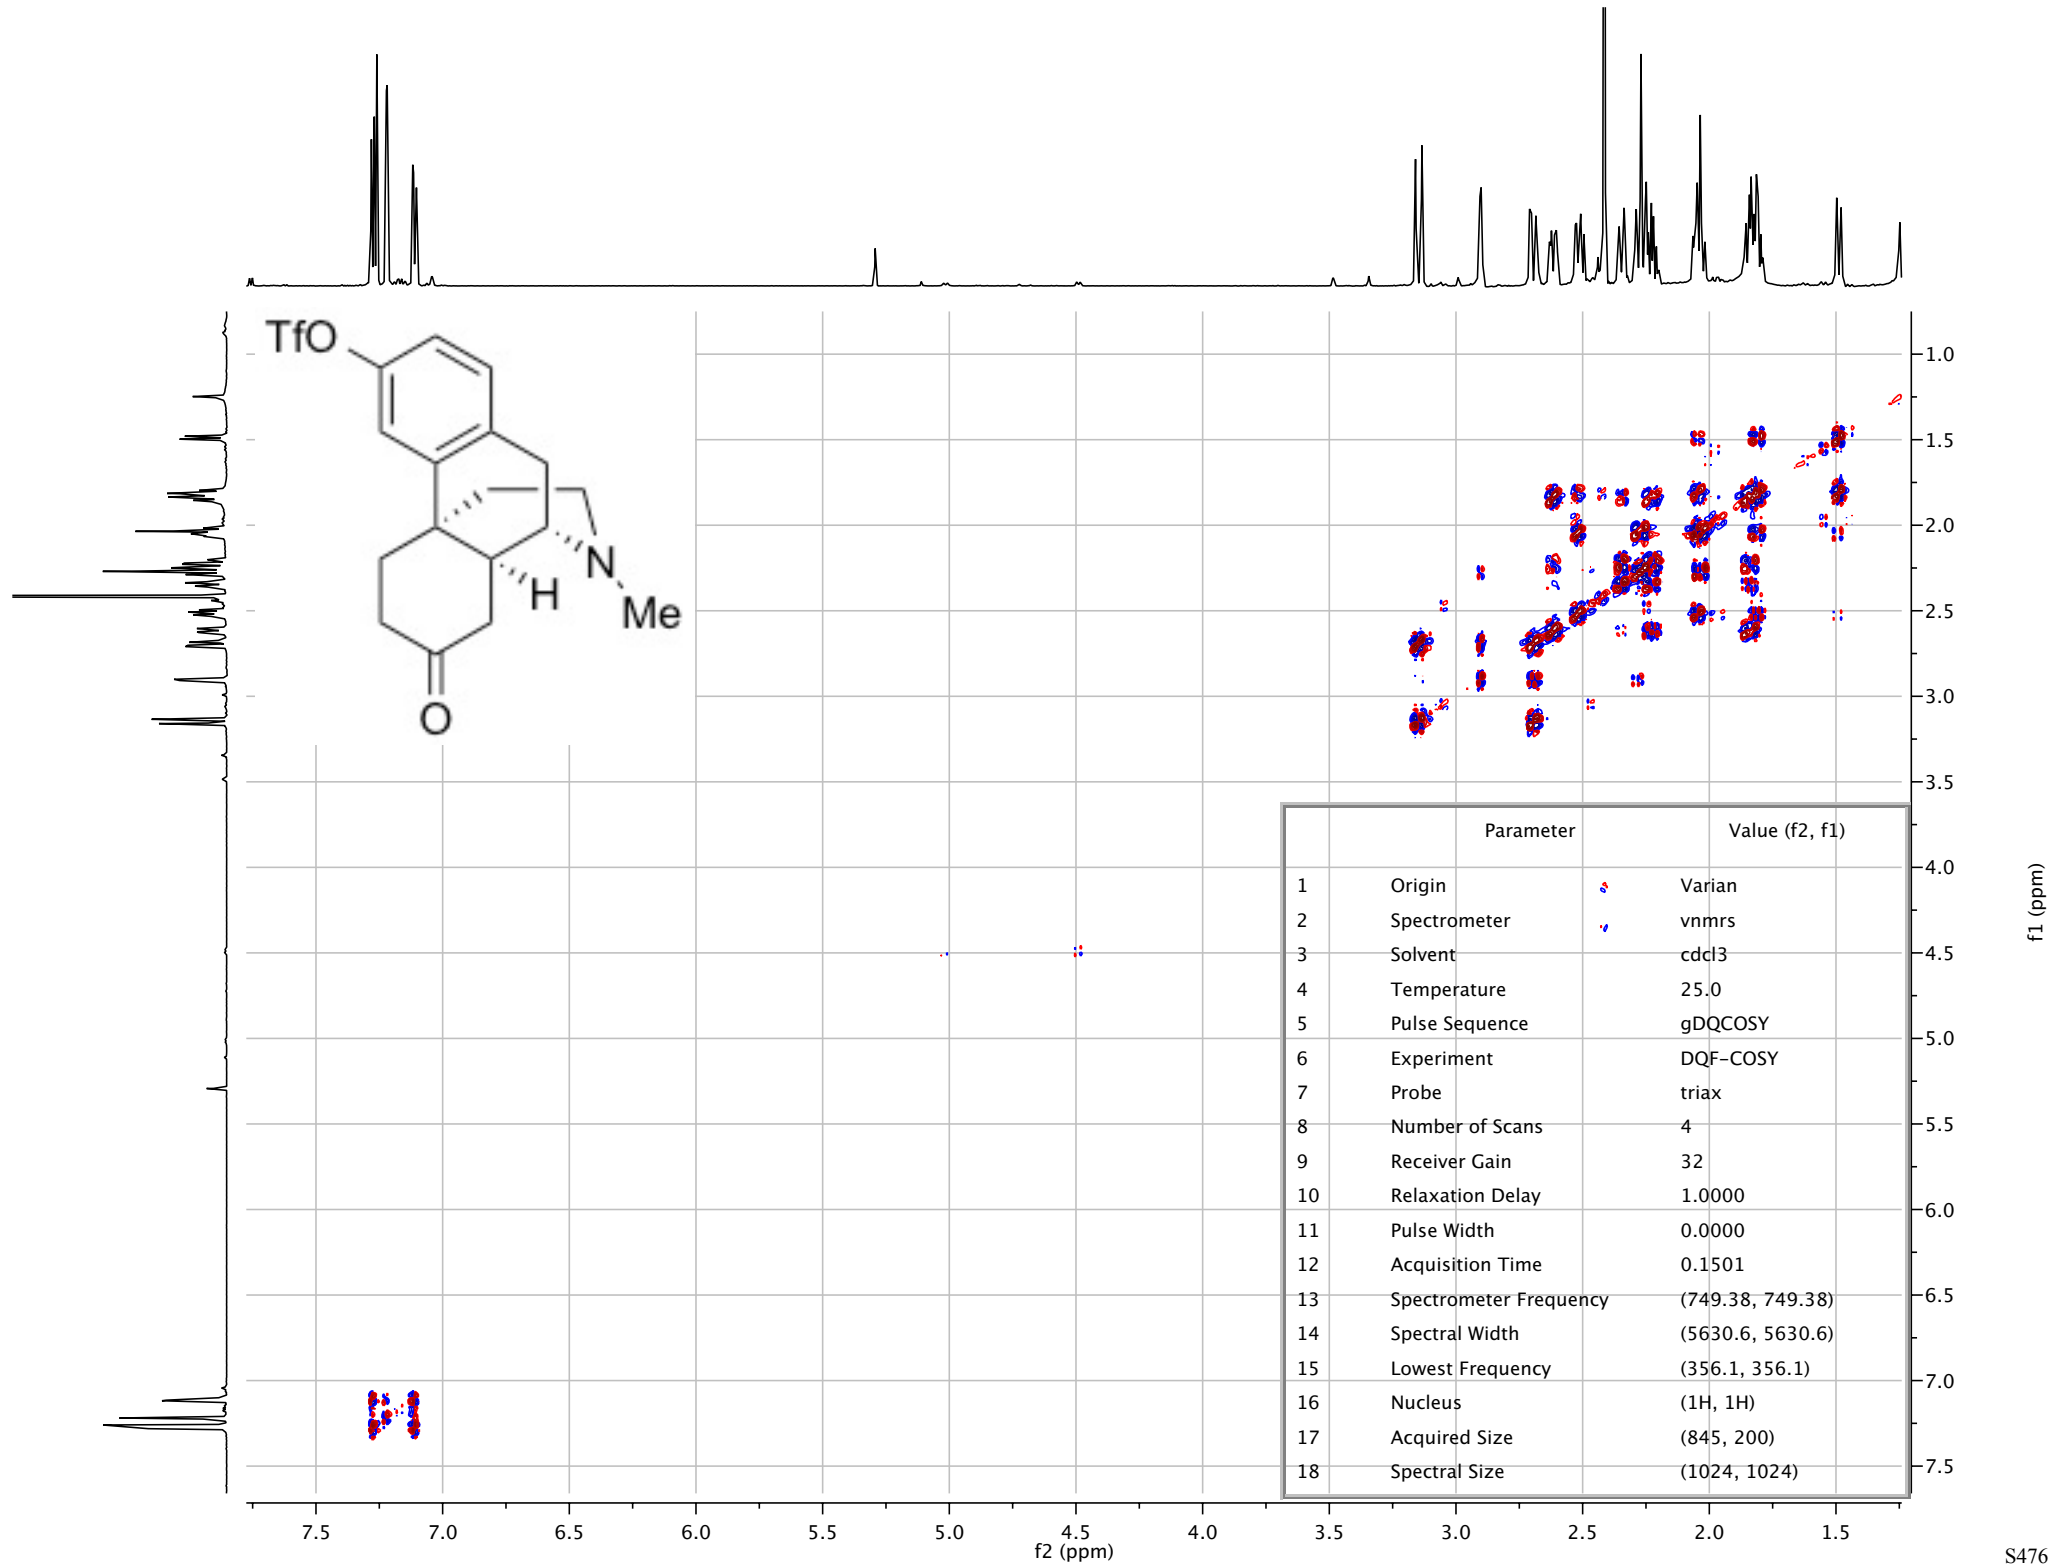

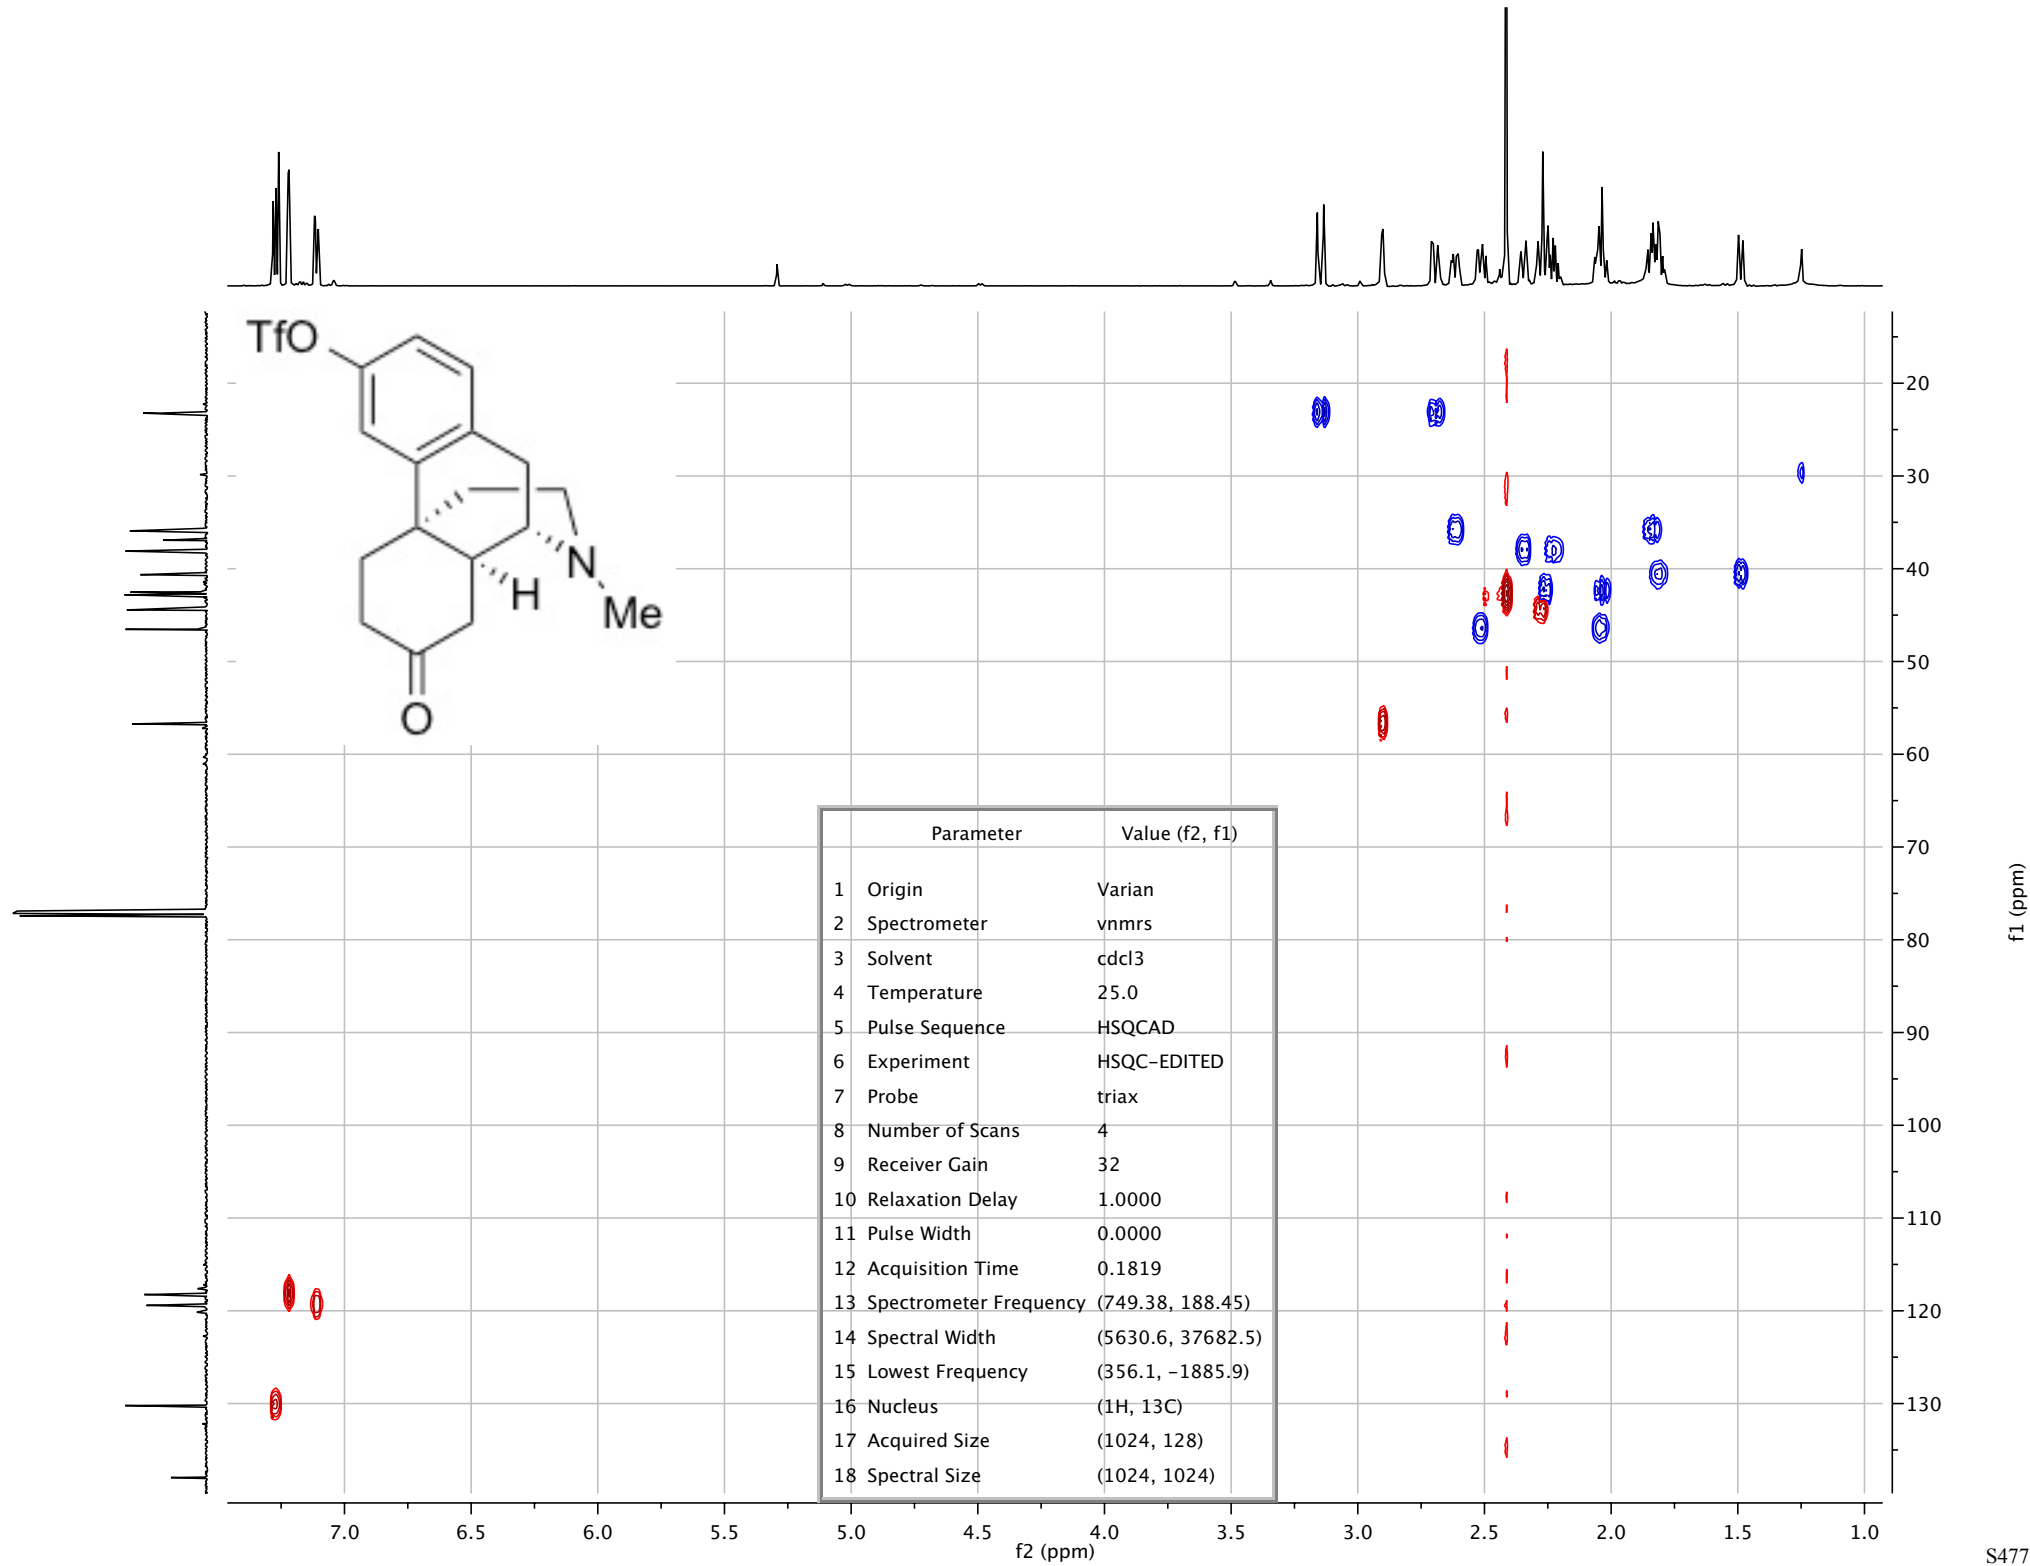

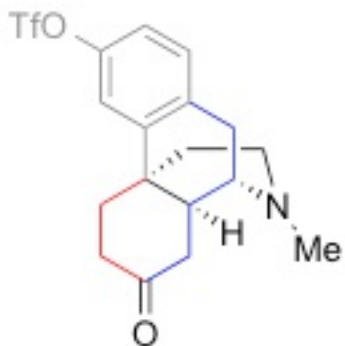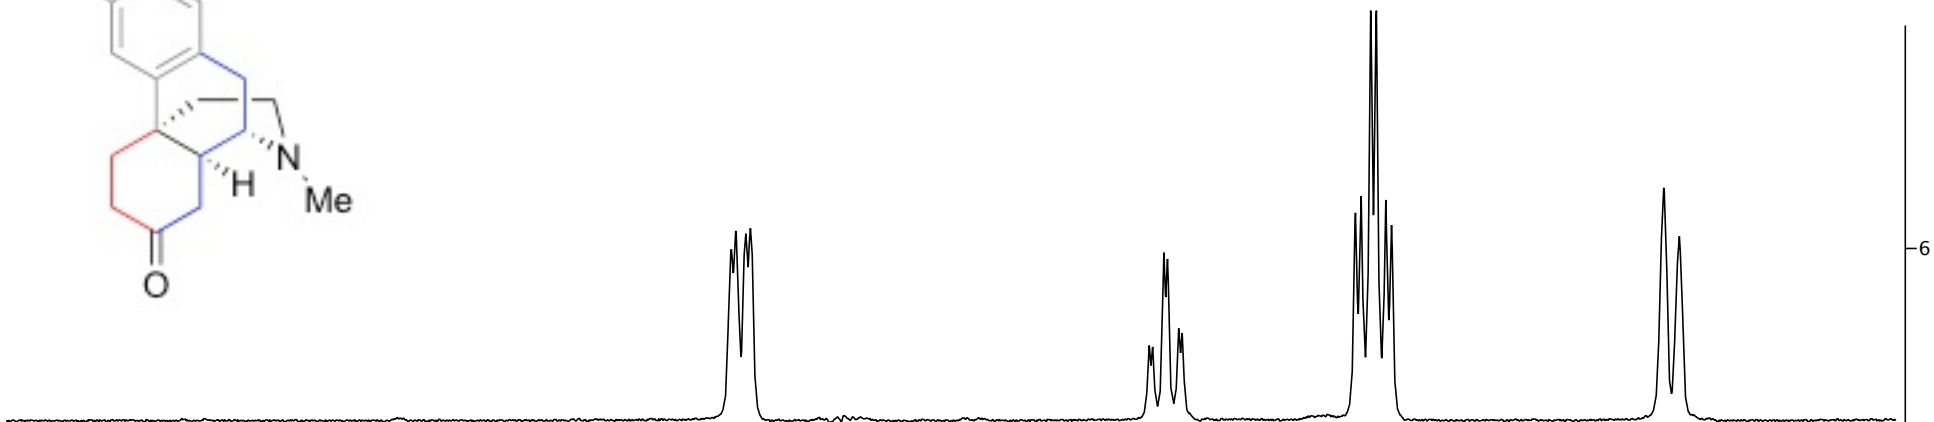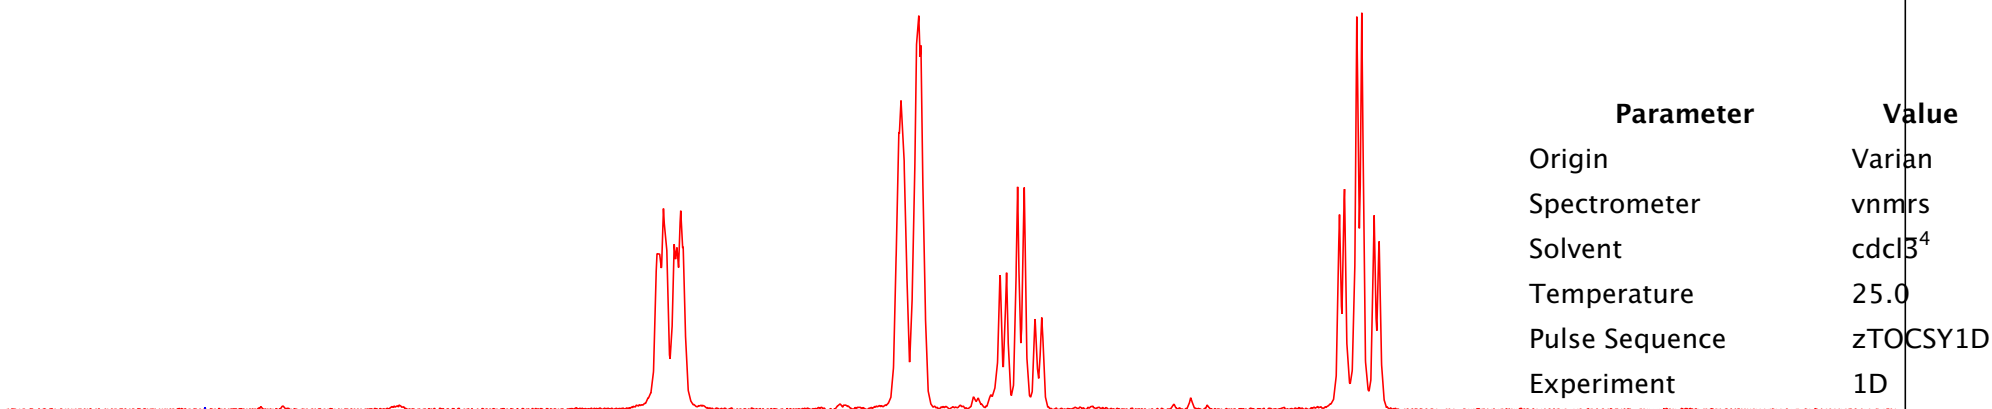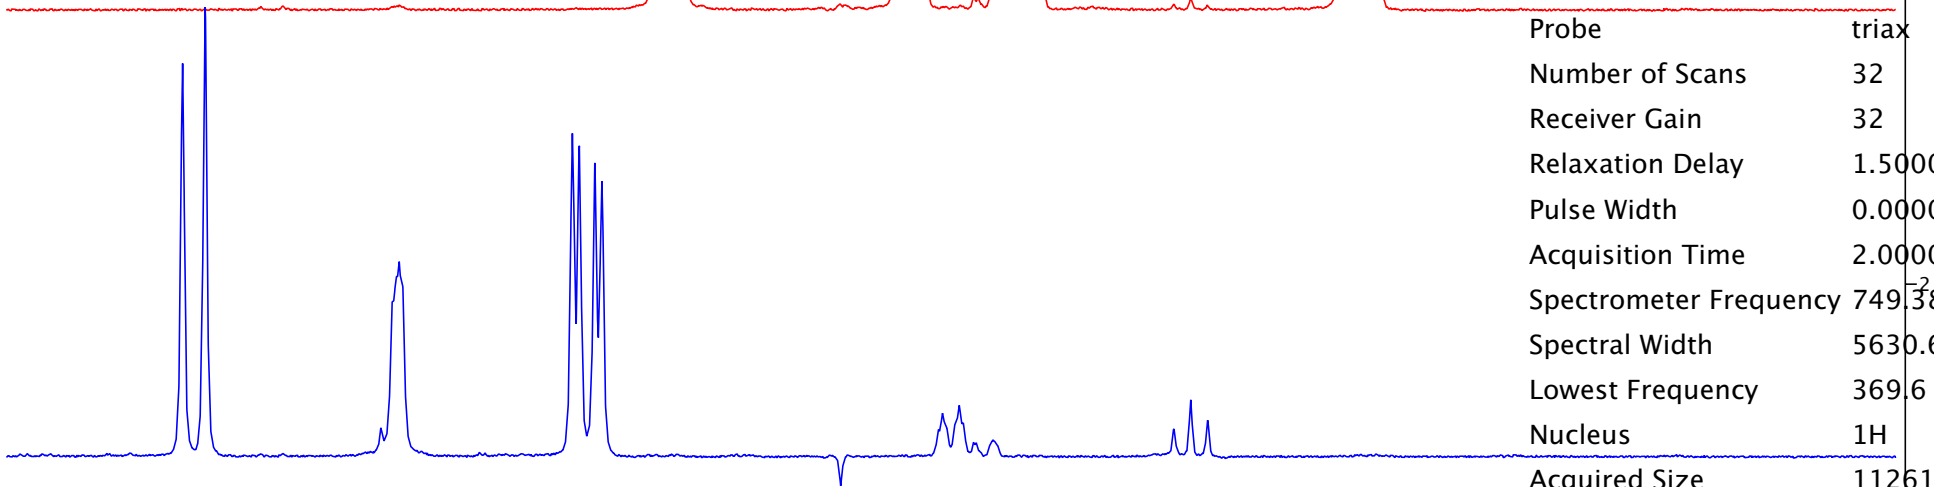

| Parameter              | Value                          |
|------------------------|--------------------------------|
| Origin                 | Varian                         |
| Spectrometer           | vnmrs                          |
| Solvent                | cdcl <sub>3</sub> <sup>4</sup> |
| Temperature            | 25.0                           |
| Pulse Sequence         | zTOCSY1D                       |
| Experiment             | 1D                             |
| Probe                  | triax                          |
| Number of Scans        | 32                             |
| Receiver Gain          | 32                             |
| Relaxation Delay       | 1.5000                         |
| Pulse Width            | 0.0000                         |
| Acquisition Time       | 2.0000                         |
| Spectrometer Frequency | 749.38                         |
| Spectral Width         | 5630.6                         |
| Lowest Frequency       | 369.6                          |
| Nucleus                | <sup>1</sup> H                 |
| Acquired Size          | 11261                          |
| Spectral Size          | 65536                          |

| Parameter              | Value          |
|------------------------|----------------|
| Origin                 | Varian         |
| Spectrometer           | vnmrs          |
| Solvent                | cdcl3          |
| Temperature            | 25.0           |
| Pulse Sequence         | s2pul          |
| Experiment             | 1D             |
| Probe                  | triax          |
| Number of Scans        | 16             |
| Receiver Gain          | 32             |
| Relaxation Delay       | 15.0000        |
| Pulse Width            | 0.0000         |
| Acquisition Time       | 2.9098         |
| Spectrometer Frequency | 749.38         |
| Spectral Width         | 5630.6         |
| Lowest Frequency       | 356.1          |
| Nucleus                | <sup>1</sup> H |
| Acquired Size          | 16384          |
| Spectral Size          | 65536          |

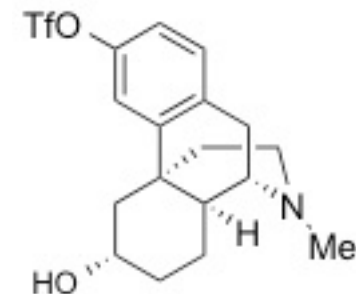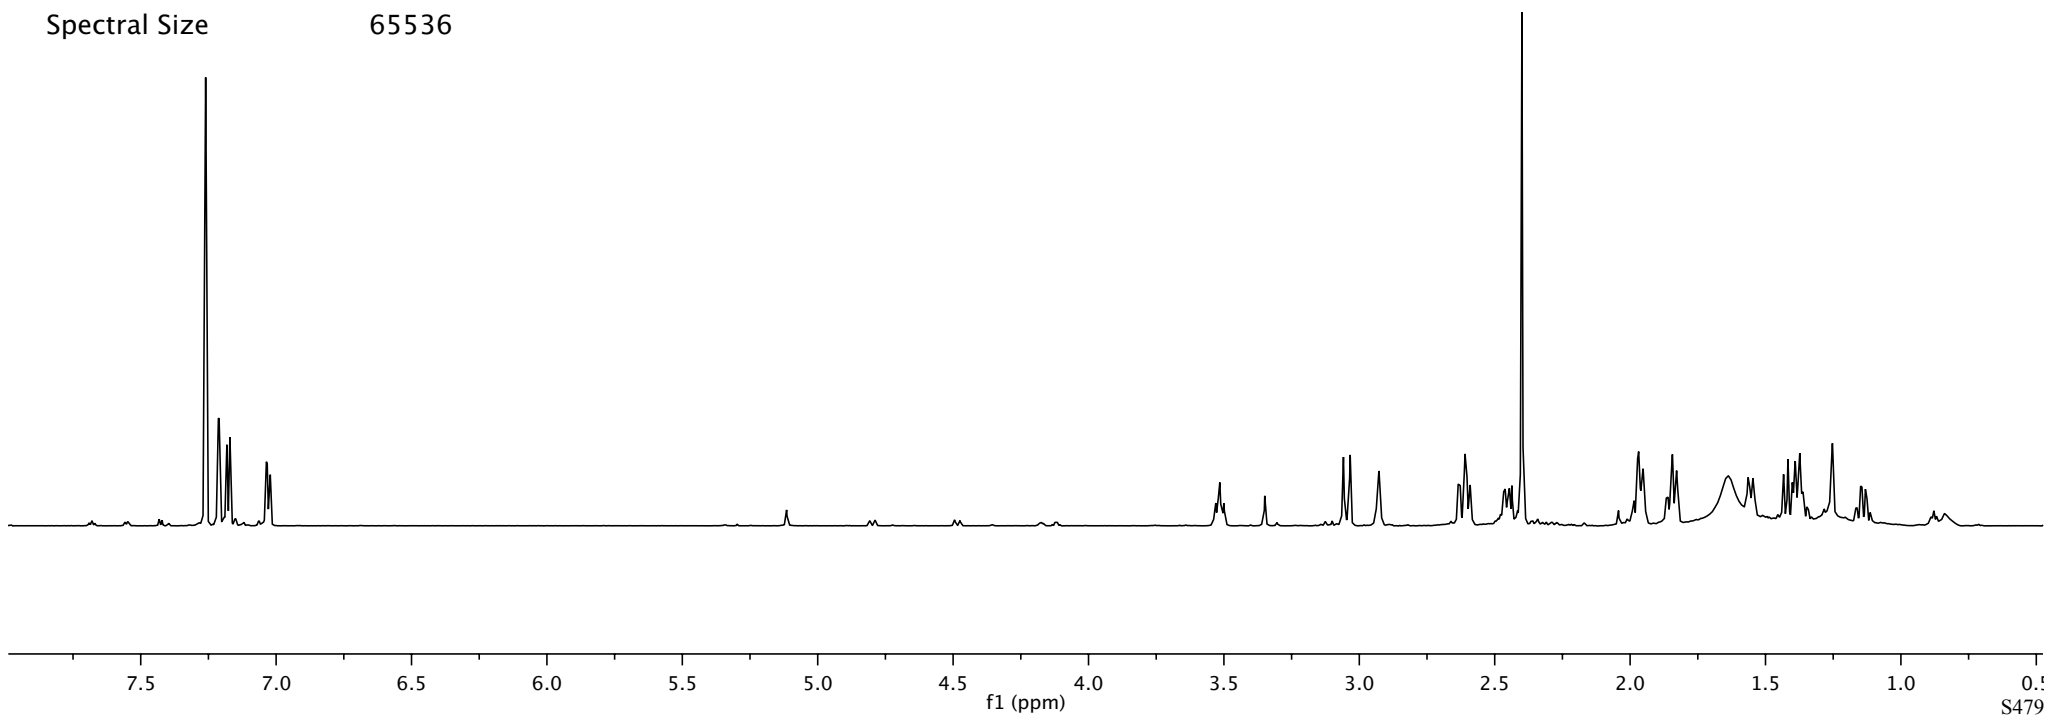



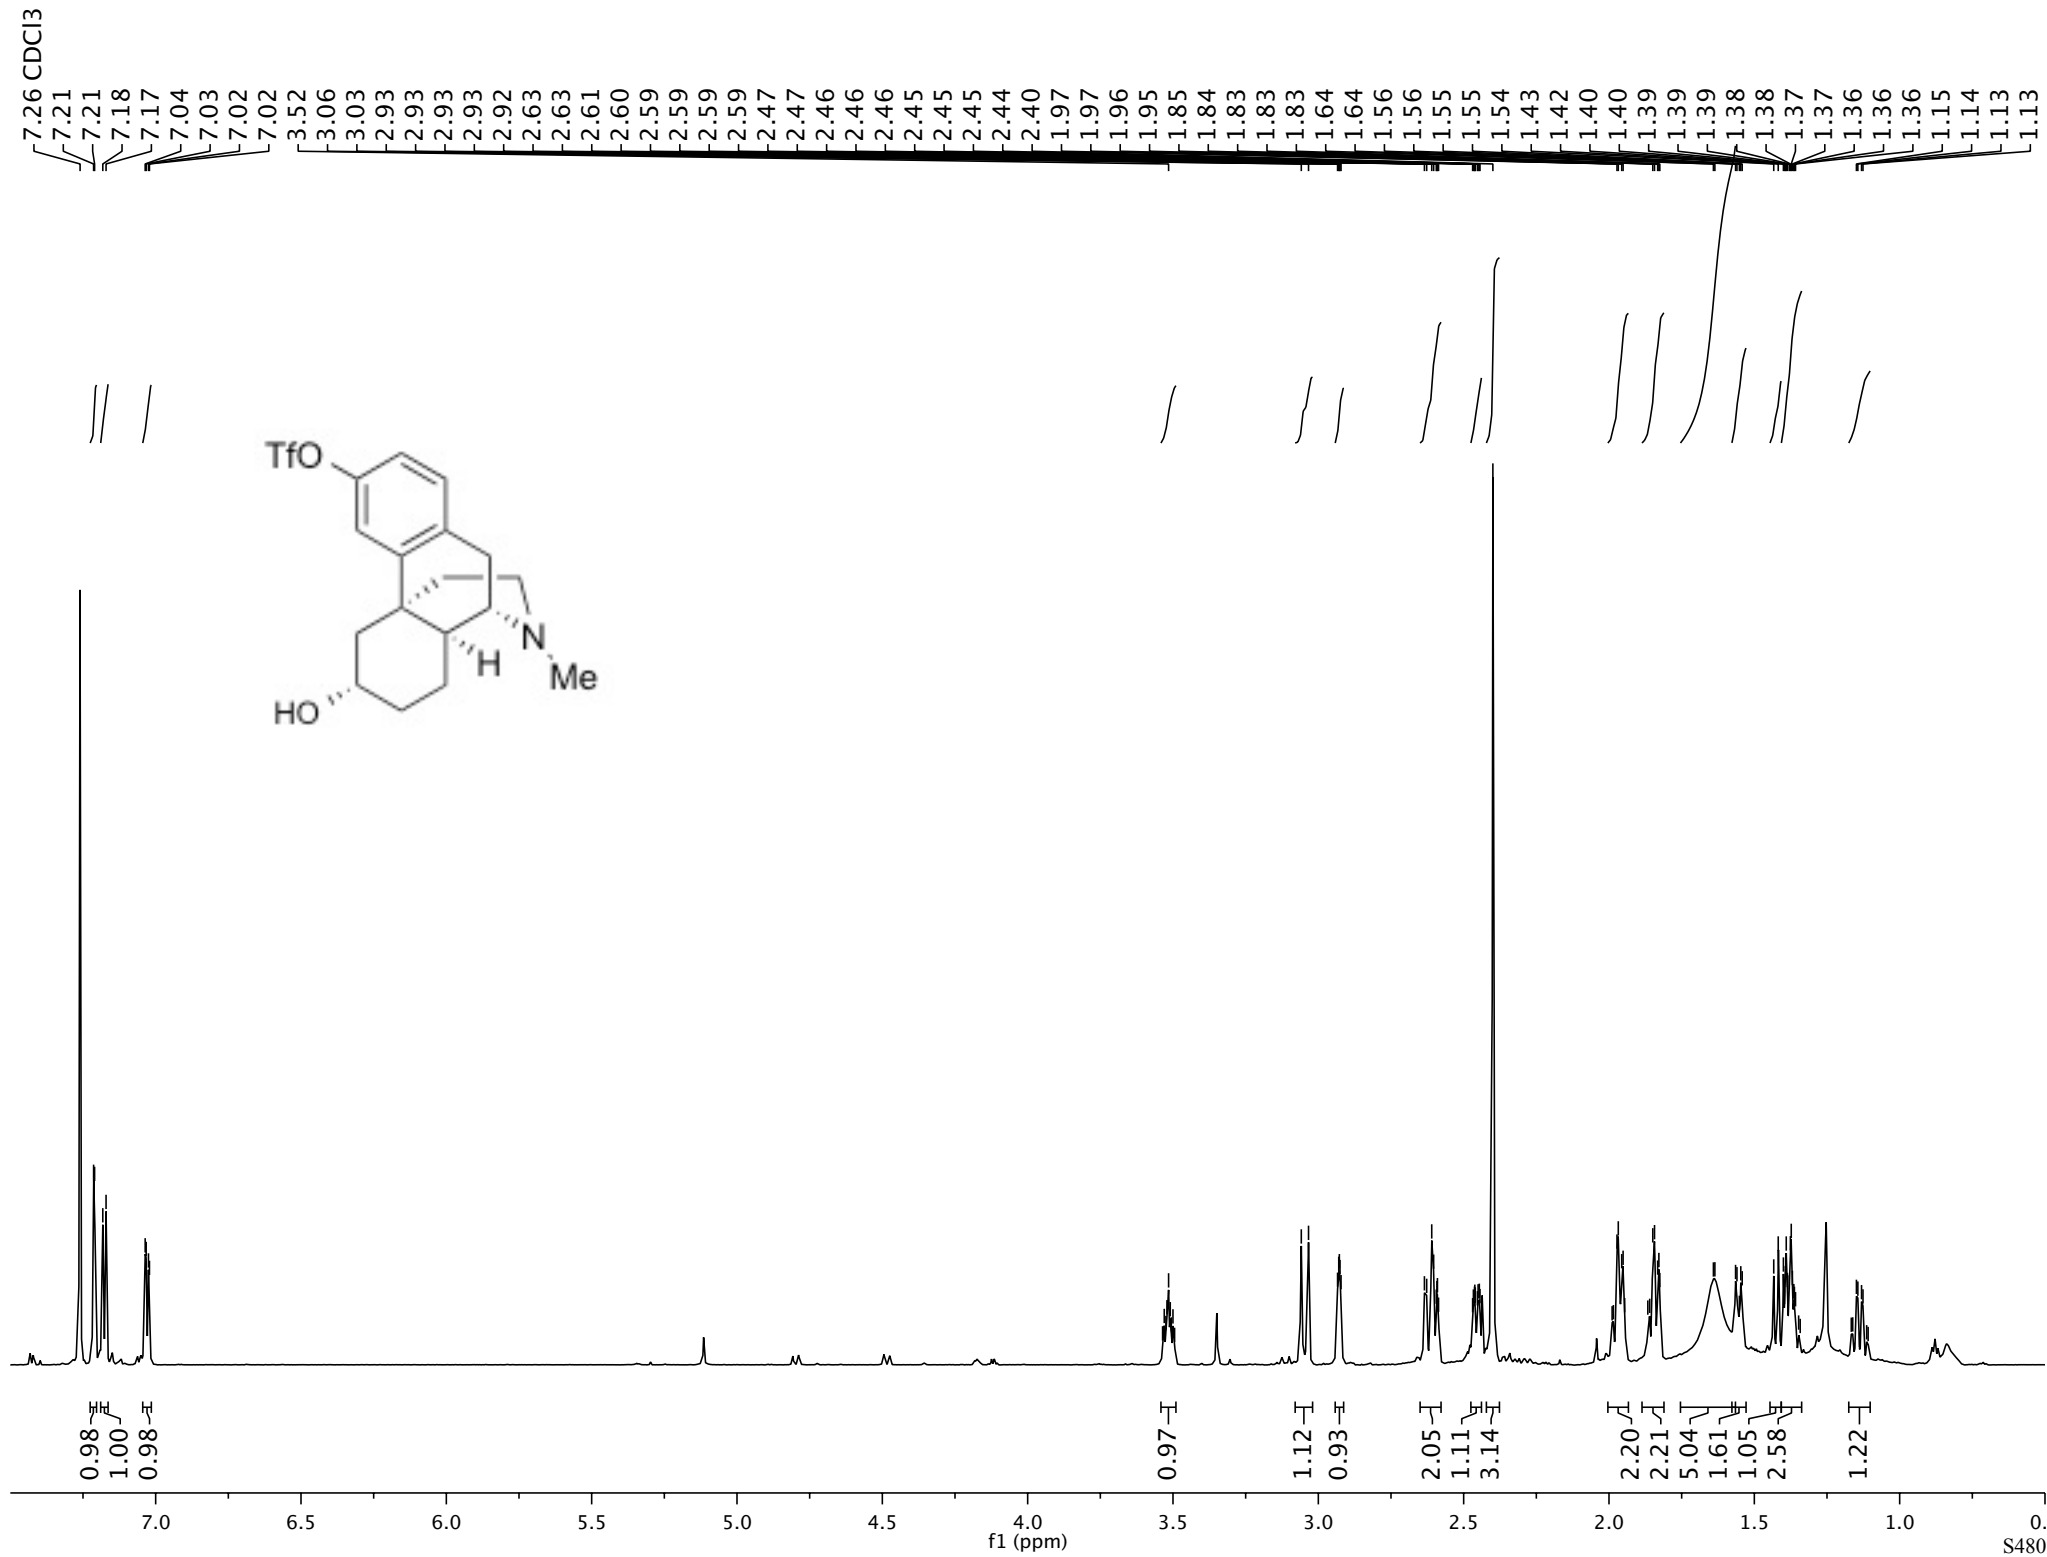

| Parameter              | Value   |
|------------------------|---------|
| Origin                 | Varian  |
| Spectrometer           | inova   |
| Solvent                | CDCl3   |
| Temperature            | 20.0    |
| Pulse Sequence         | s2pul   |
| Experiment             | 1D      |
| Probe                  | QUAD    |
| Number of Scans        | 11164   |
| Receiver Gain          | 60      |
| Relaxation Delay       | 2.0000  |
| Pulse Width            | 0.0000  |
| Acquisition Time       | 1.0863  |
| Spectrometer Frequency | 125.66  |
| Spectral Width         | 30165.9 |
| Lowest Frequency       | -1272.0 |
| Nucleus                | 13C     |
| Acquired Size          | 32768   |
| Spectral Size          | 65536   |

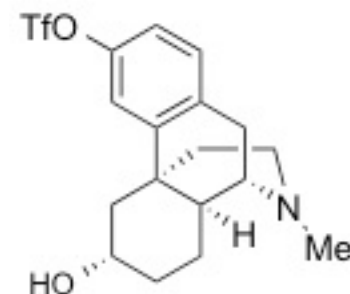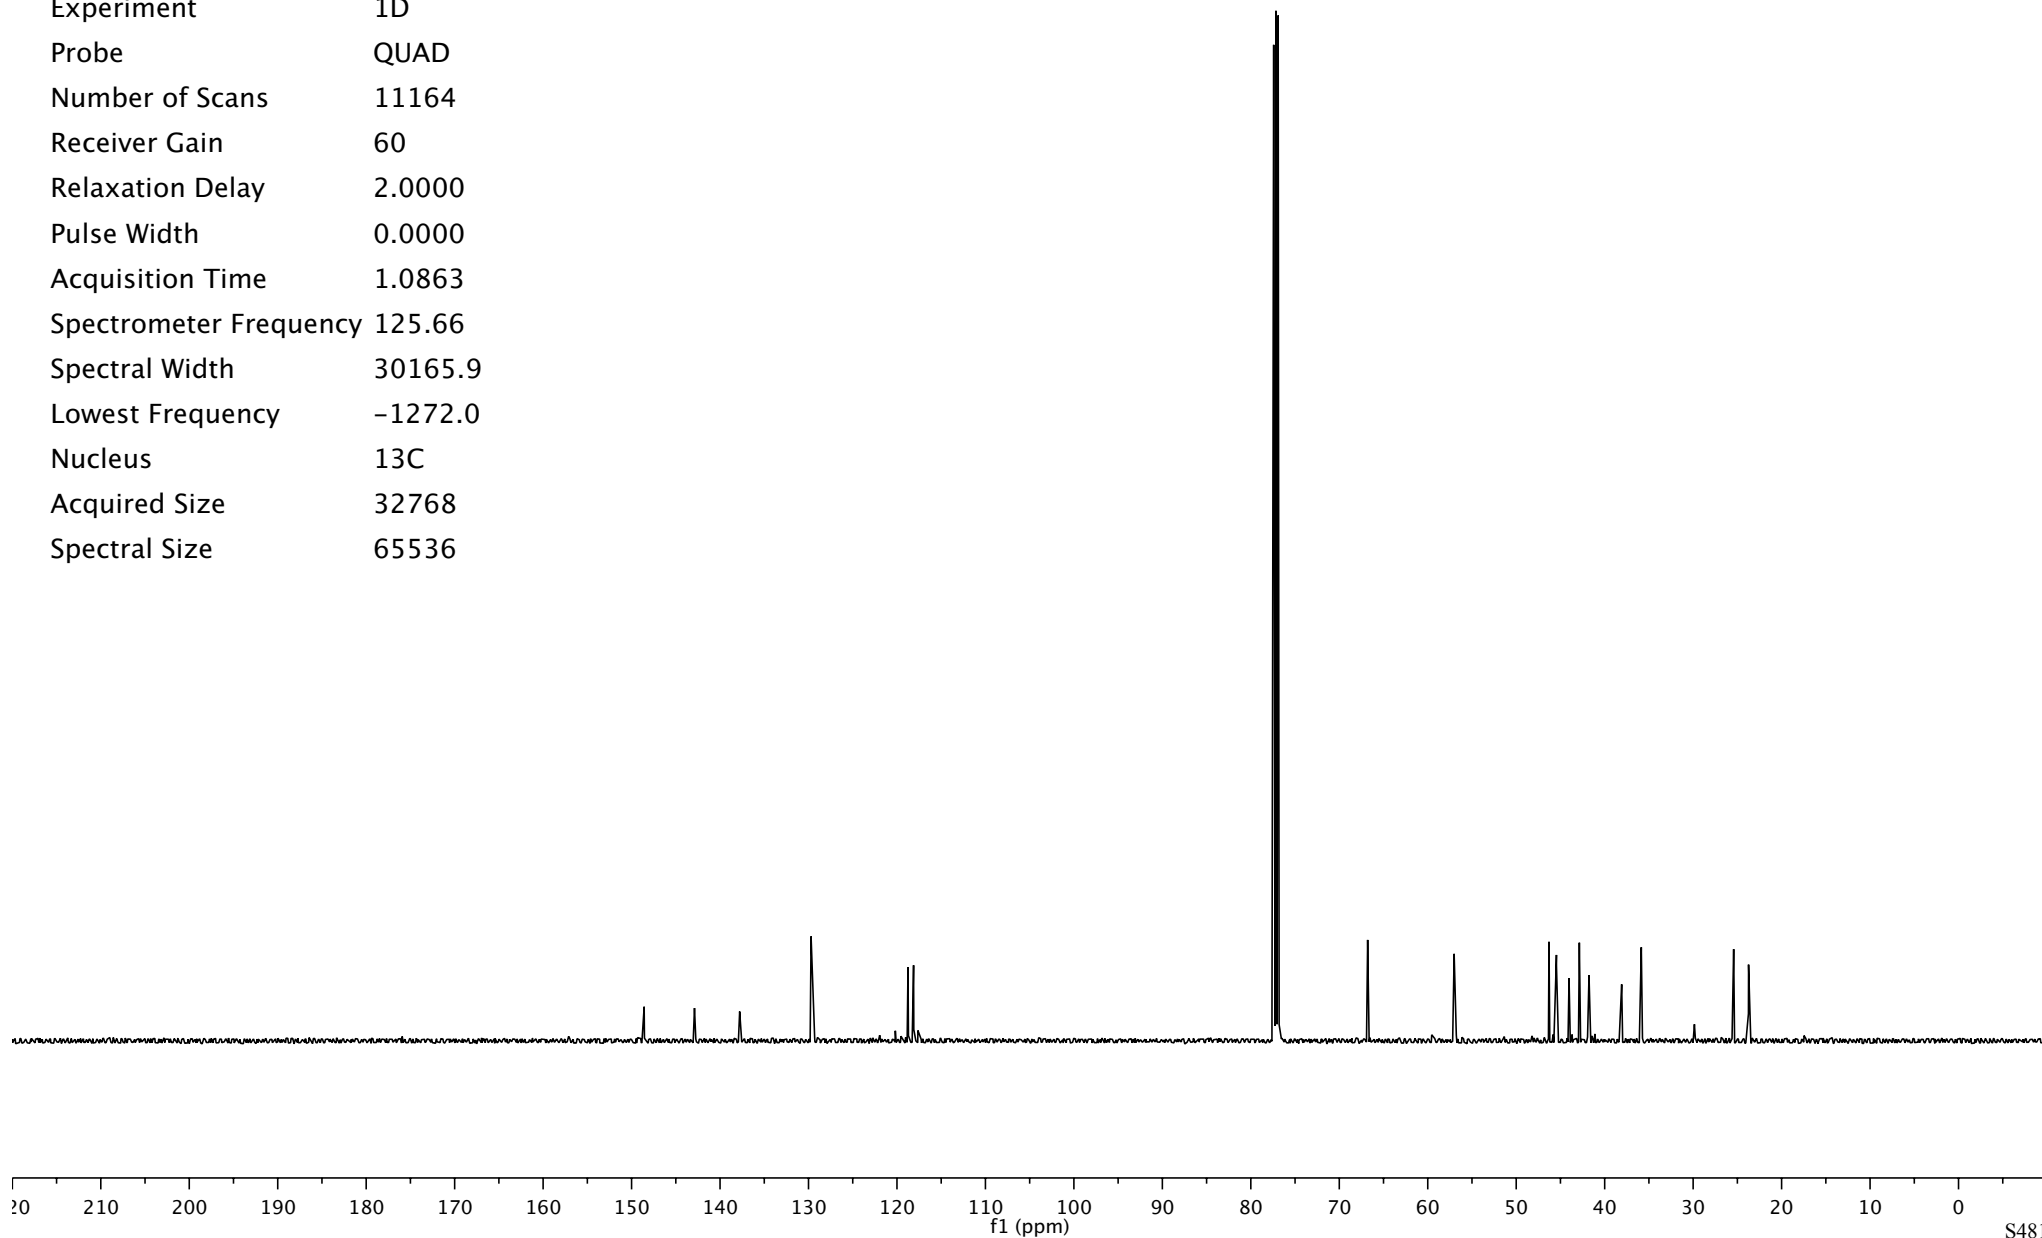

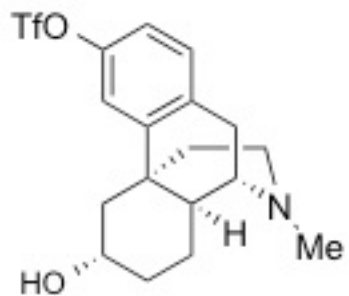

—129.71

—120.18

—118.75

—118.12

—117.63

—77.16 CDCl<sub>3</sub>

—66.79

—57.02

—46.30

—45.45

—44.03

—42.86

—41.77

—38.08

—35.86

—25.42

—23.74

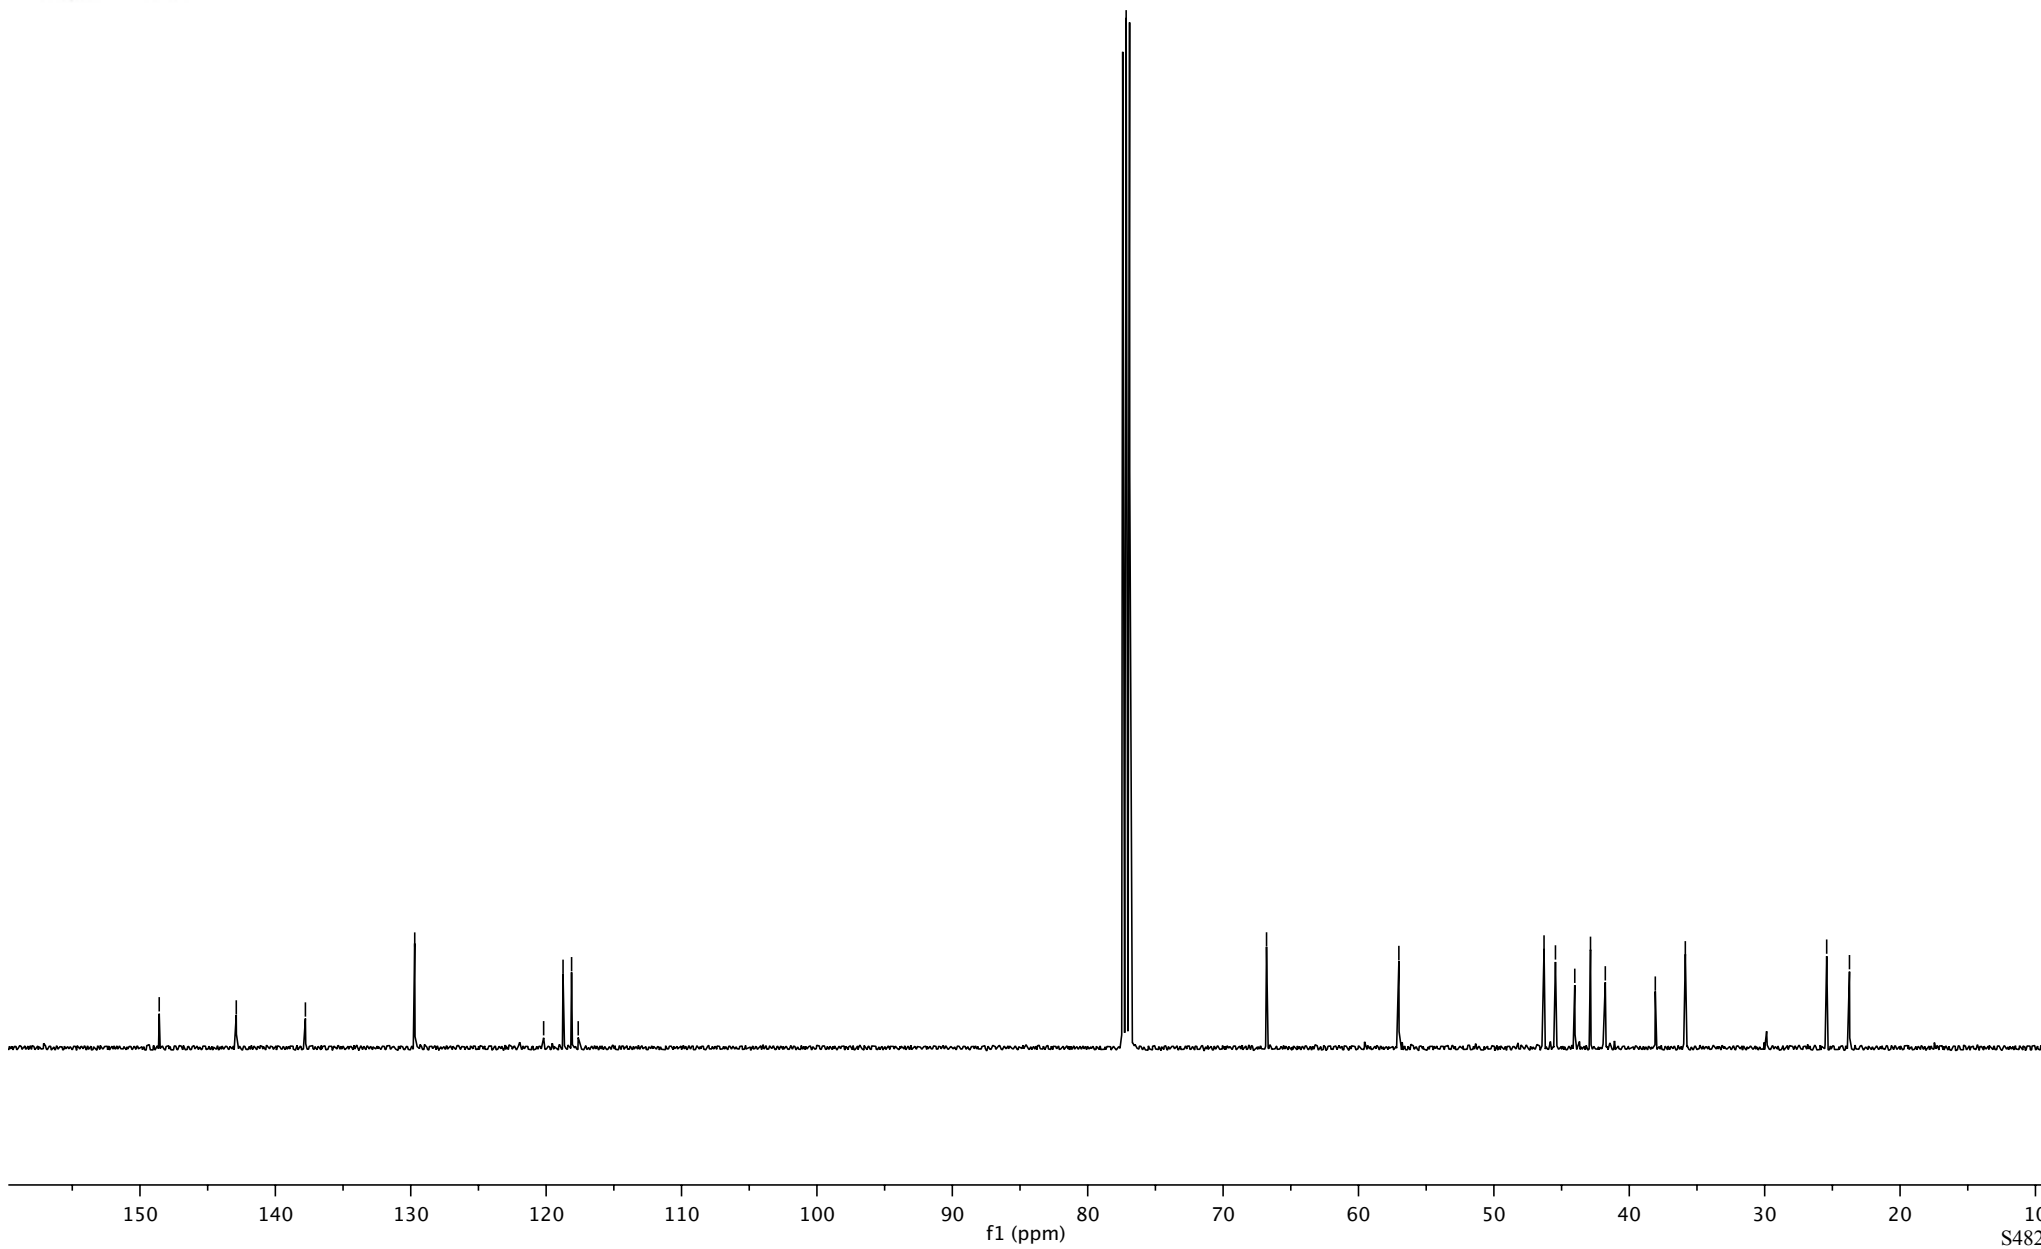

| Parameter              | Value             |
|------------------------|-------------------|
| Origin                 | Varian            |
| Spectrometer           | inova             |
| Solvent                | CDCl <sub>3</sub> |
| Temperature            | 20.0              |
| Pulse Sequence         | s2pul             |
| Experiment             | 1D                |
| Probe                  | QUAD              |
| Number of Scans        | 128               |
| Receiver Gain          | 50                |
| Relaxation Delay       | 0.0000            |
| Pulse Width            | 0.0000            |
| Acquisition Time       | 0.3277            |
| Spectrometer Frequency | 470.15            |
| Spectral Width         | 100000.0          |
| Lowest Frequency       | -79501.3          |
| Nucleus                | <sup>19</sup> F   |
| Acquired Size          | 32768             |
| Spectral Size          | 65536             |

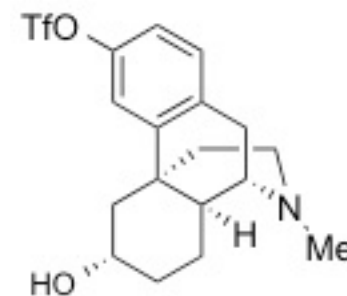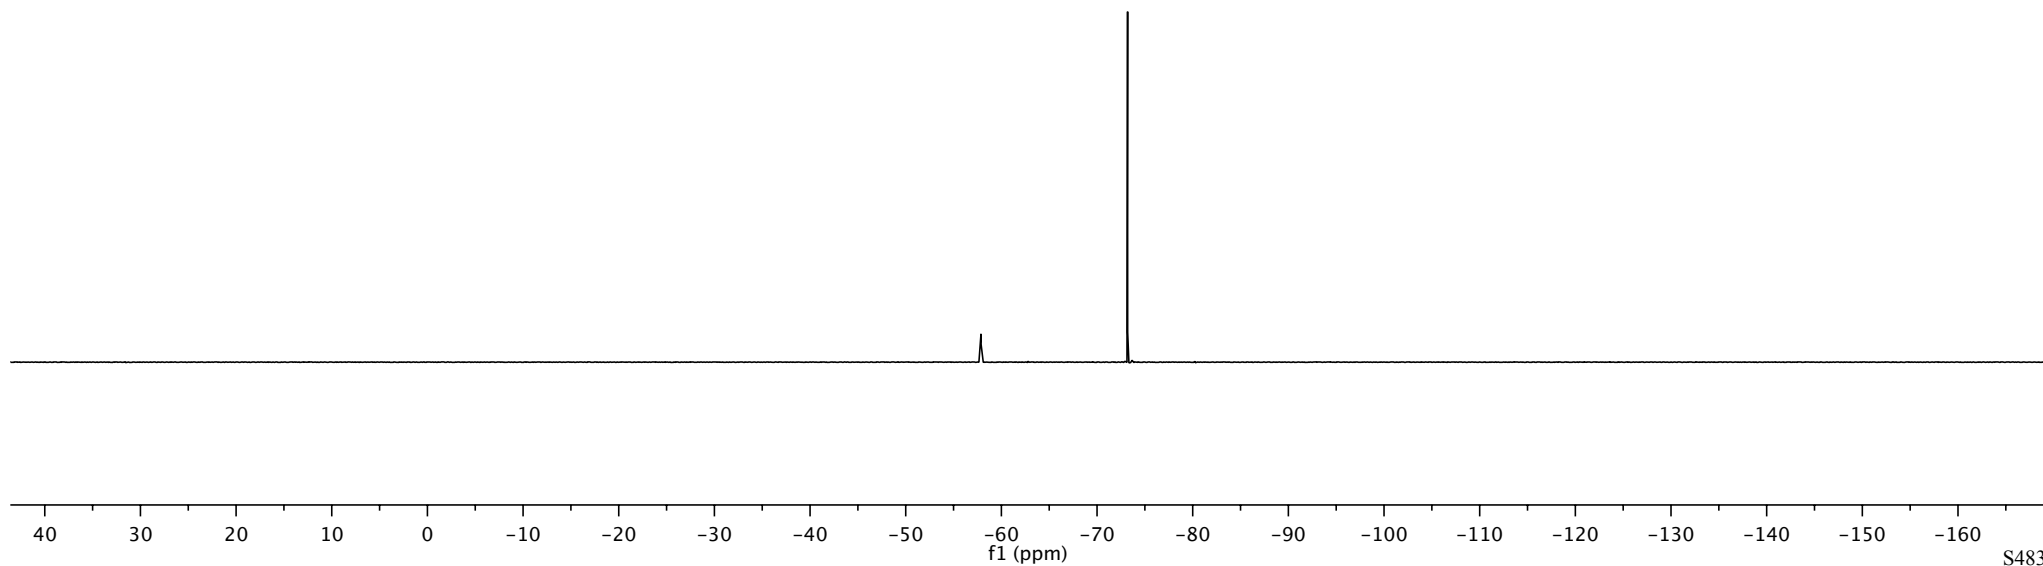

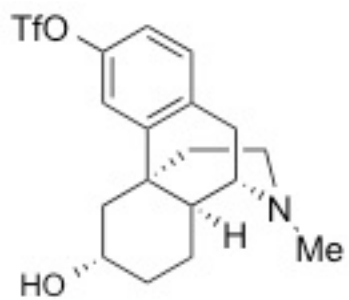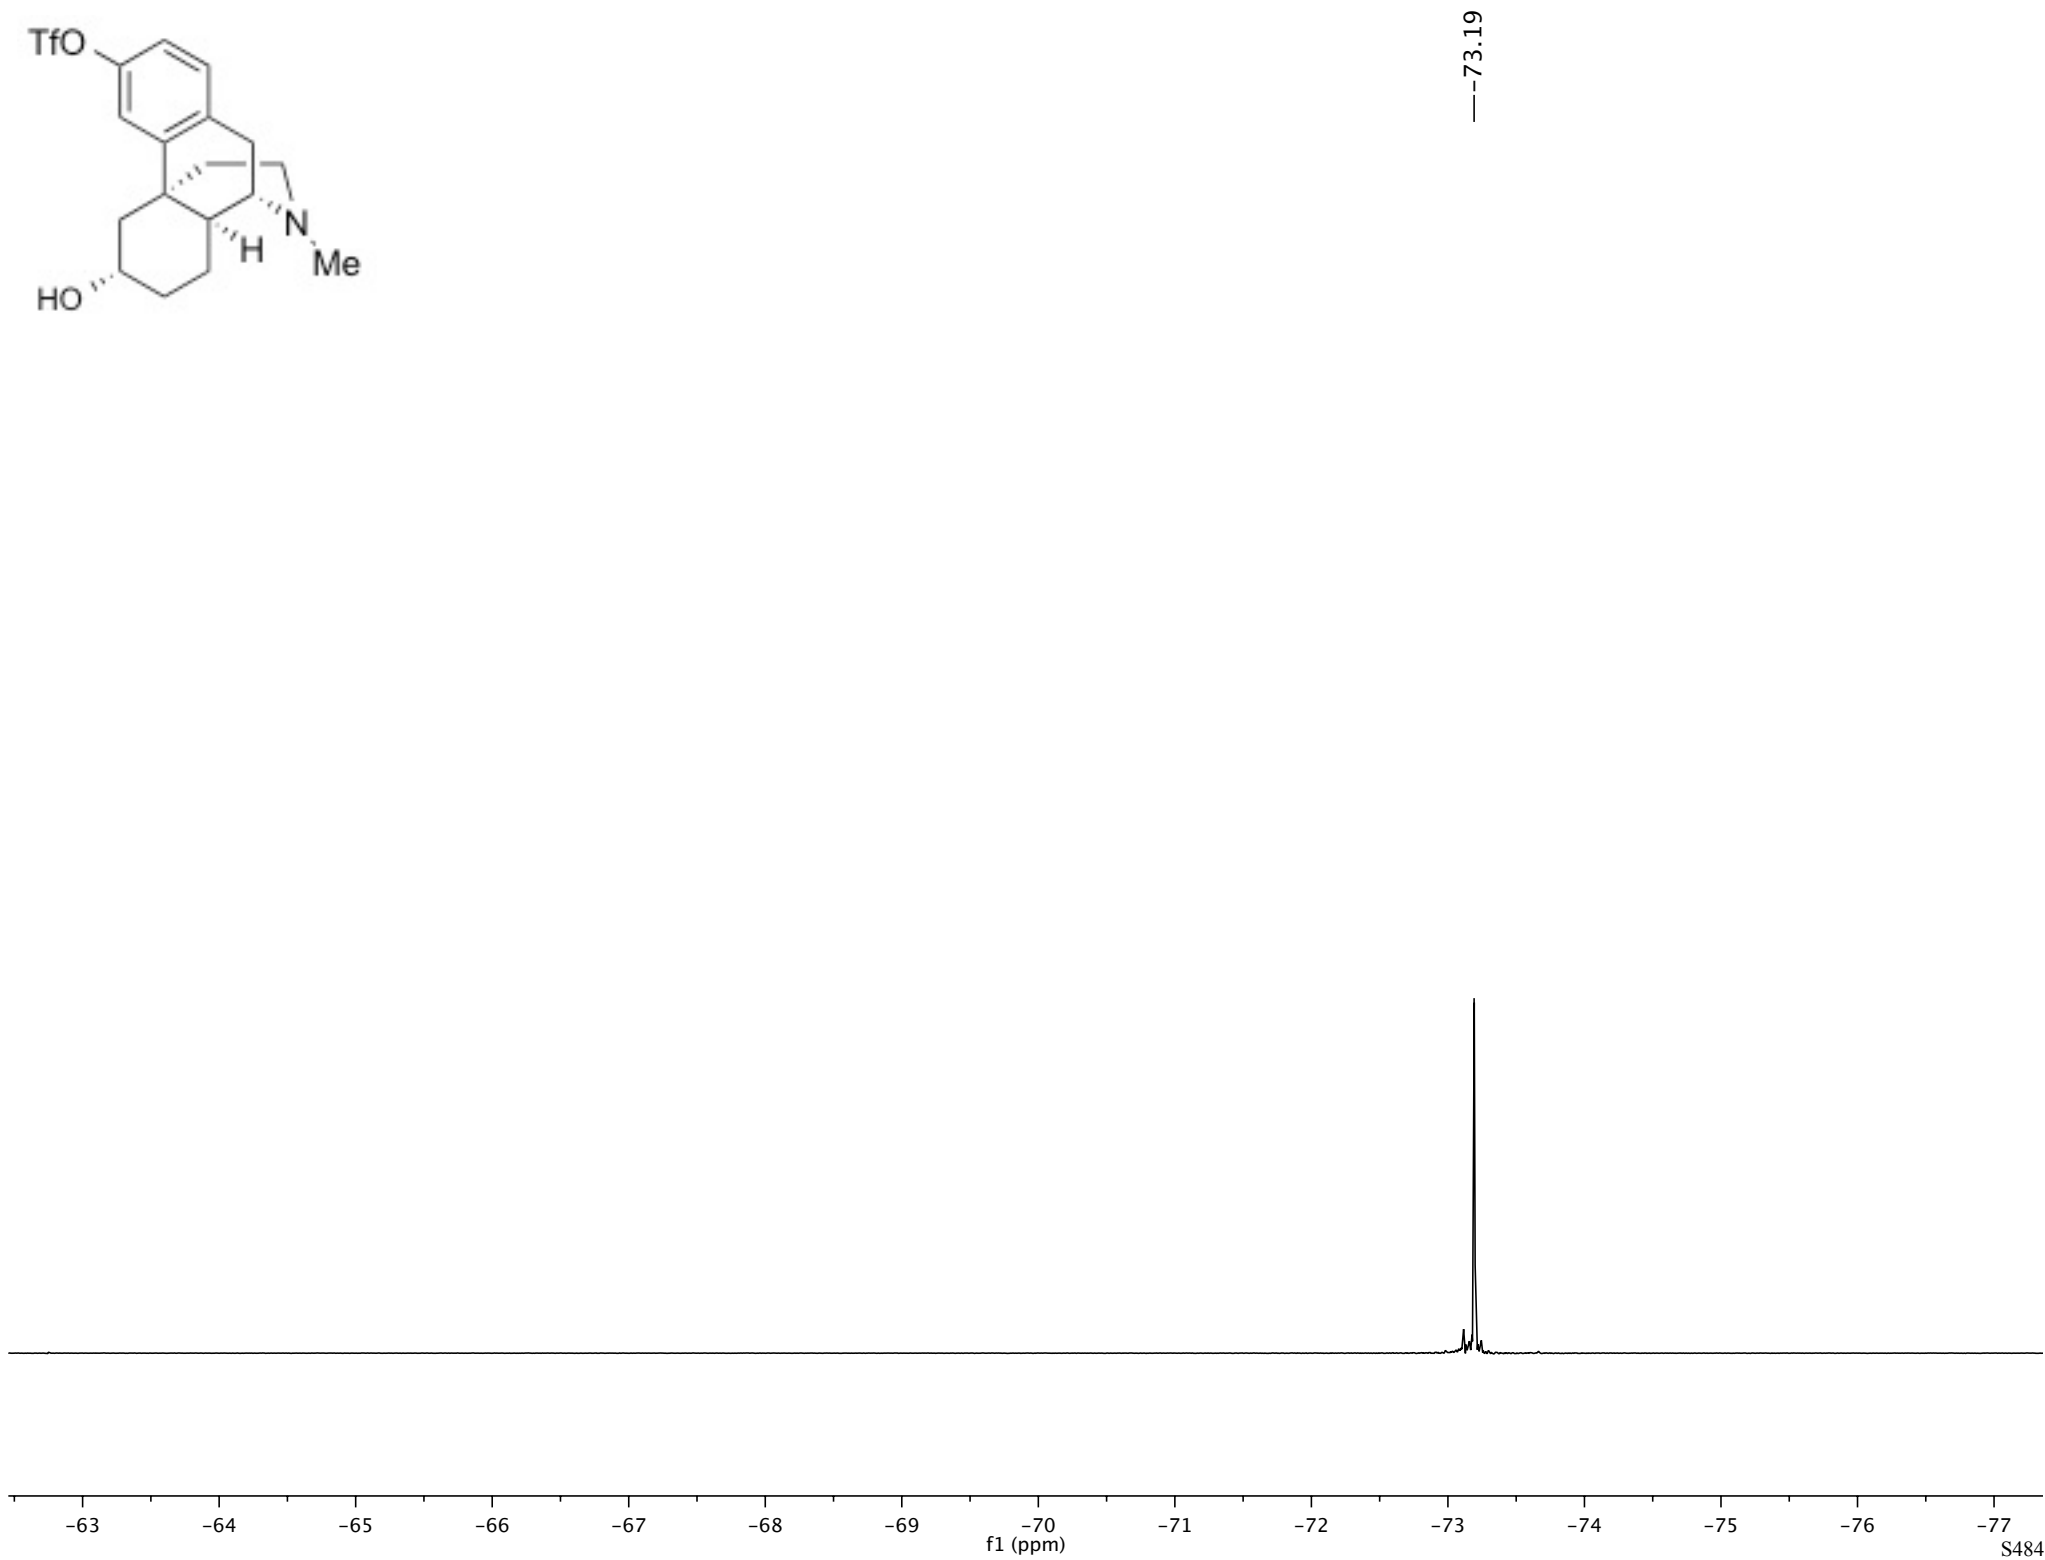

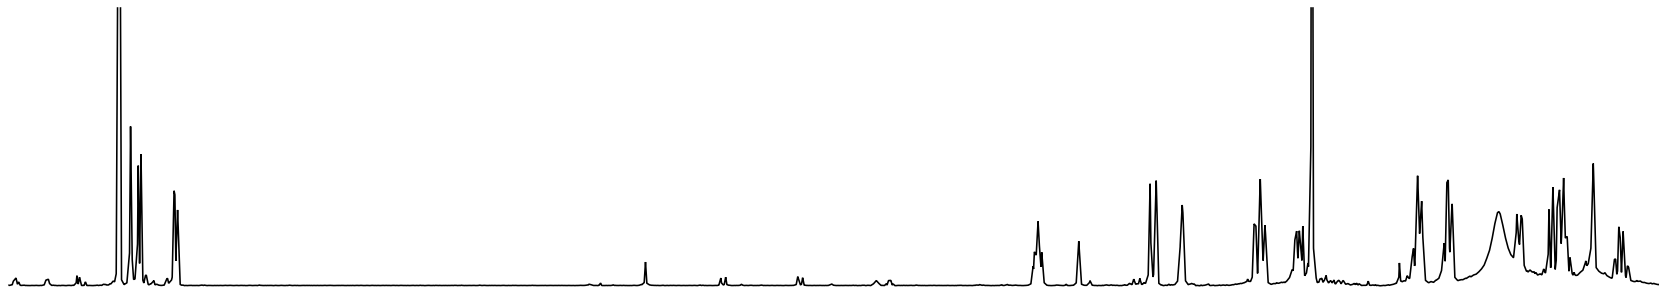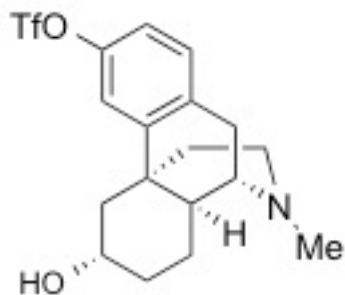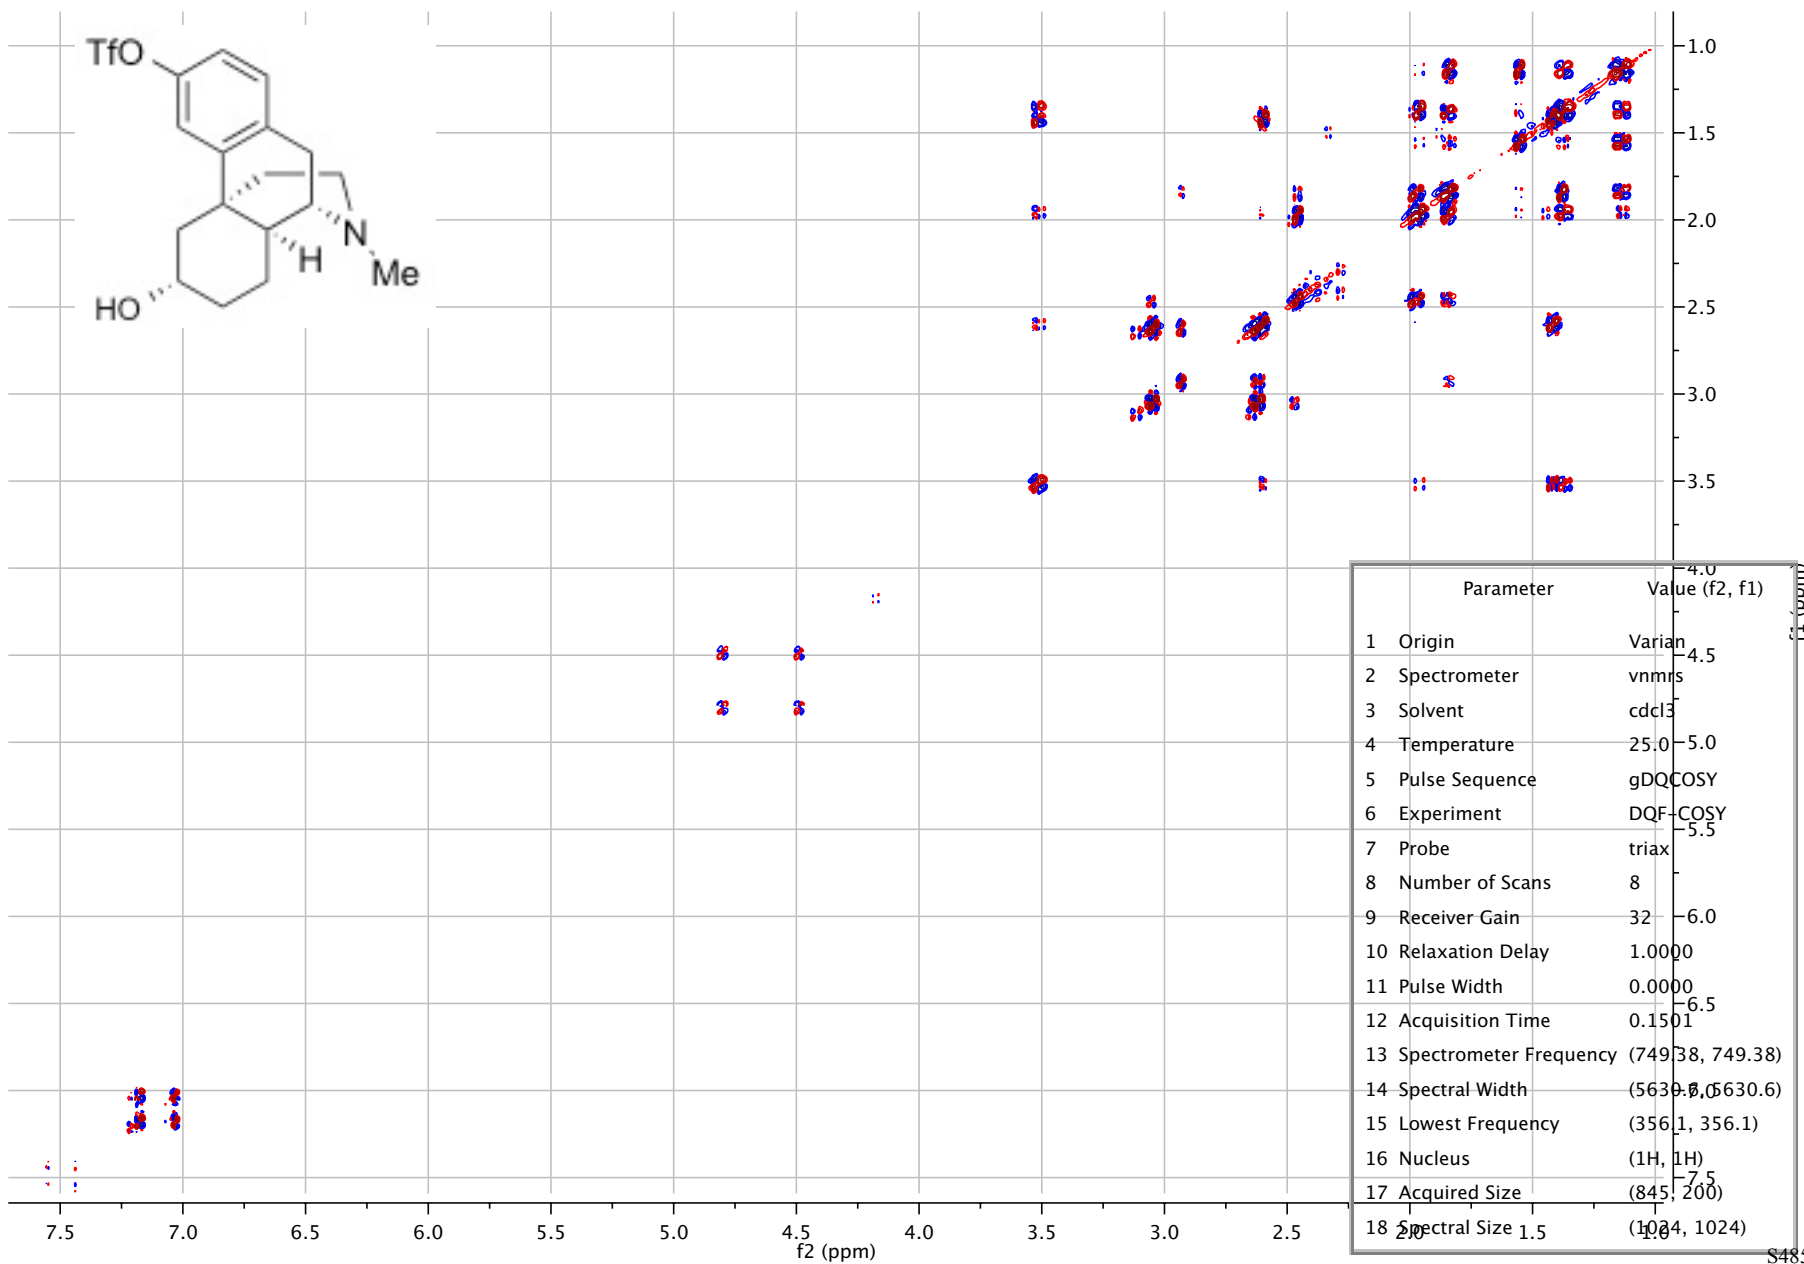

| Parameter |                        | Value (f2, f1)    |
|-----------|------------------------|-------------------|
| 1         | Origin                 | Varian            |
| 2         | Spectrometer           | vnmr1s            |
| 3         | Solvent                | cdcl3             |
| 4         | Temperature            | 25.0              |
| 5         | Pulse Sequence         | gDQF-COSY         |
| 6         | Experiment             | DQF-COSY          |
| 7         | Probe                  | triax             |
| 8         | Number of Scans        | 8                 |
| 9         | Receiver Gain          | 32                |
| 10        | Relaxation Delay       | 1.0000            |
| 11        | Pulse Width            | 0.0000            |
| 12        | Acquisition Time       | 0.1501            |
| 13        | Spectrometer Frequency | (749.138, 749.38) |
| 14        | Spectral Width         | (5639.0, 5630.6)  |
| 15        | Lowest Frequency       | (356.1, 356.1)    |
| 16        | Nucleus                | (1H, 1H)          |
| 17        | Acquired Size          | (845, 200)        |
| 18        | Spectral Size          | (1024, 1024)      |

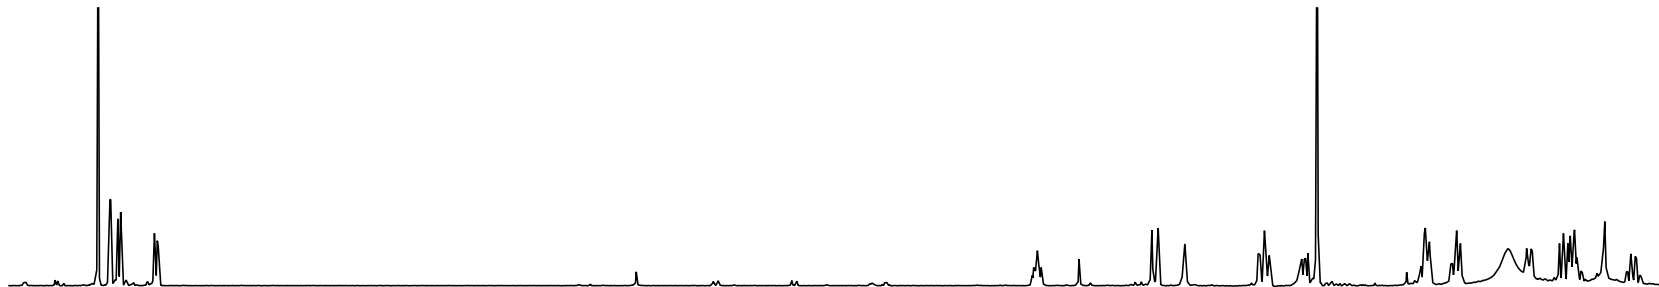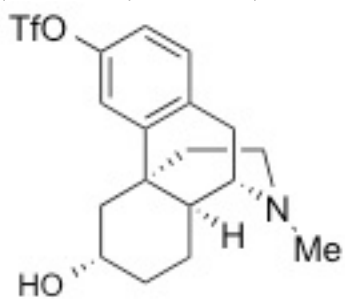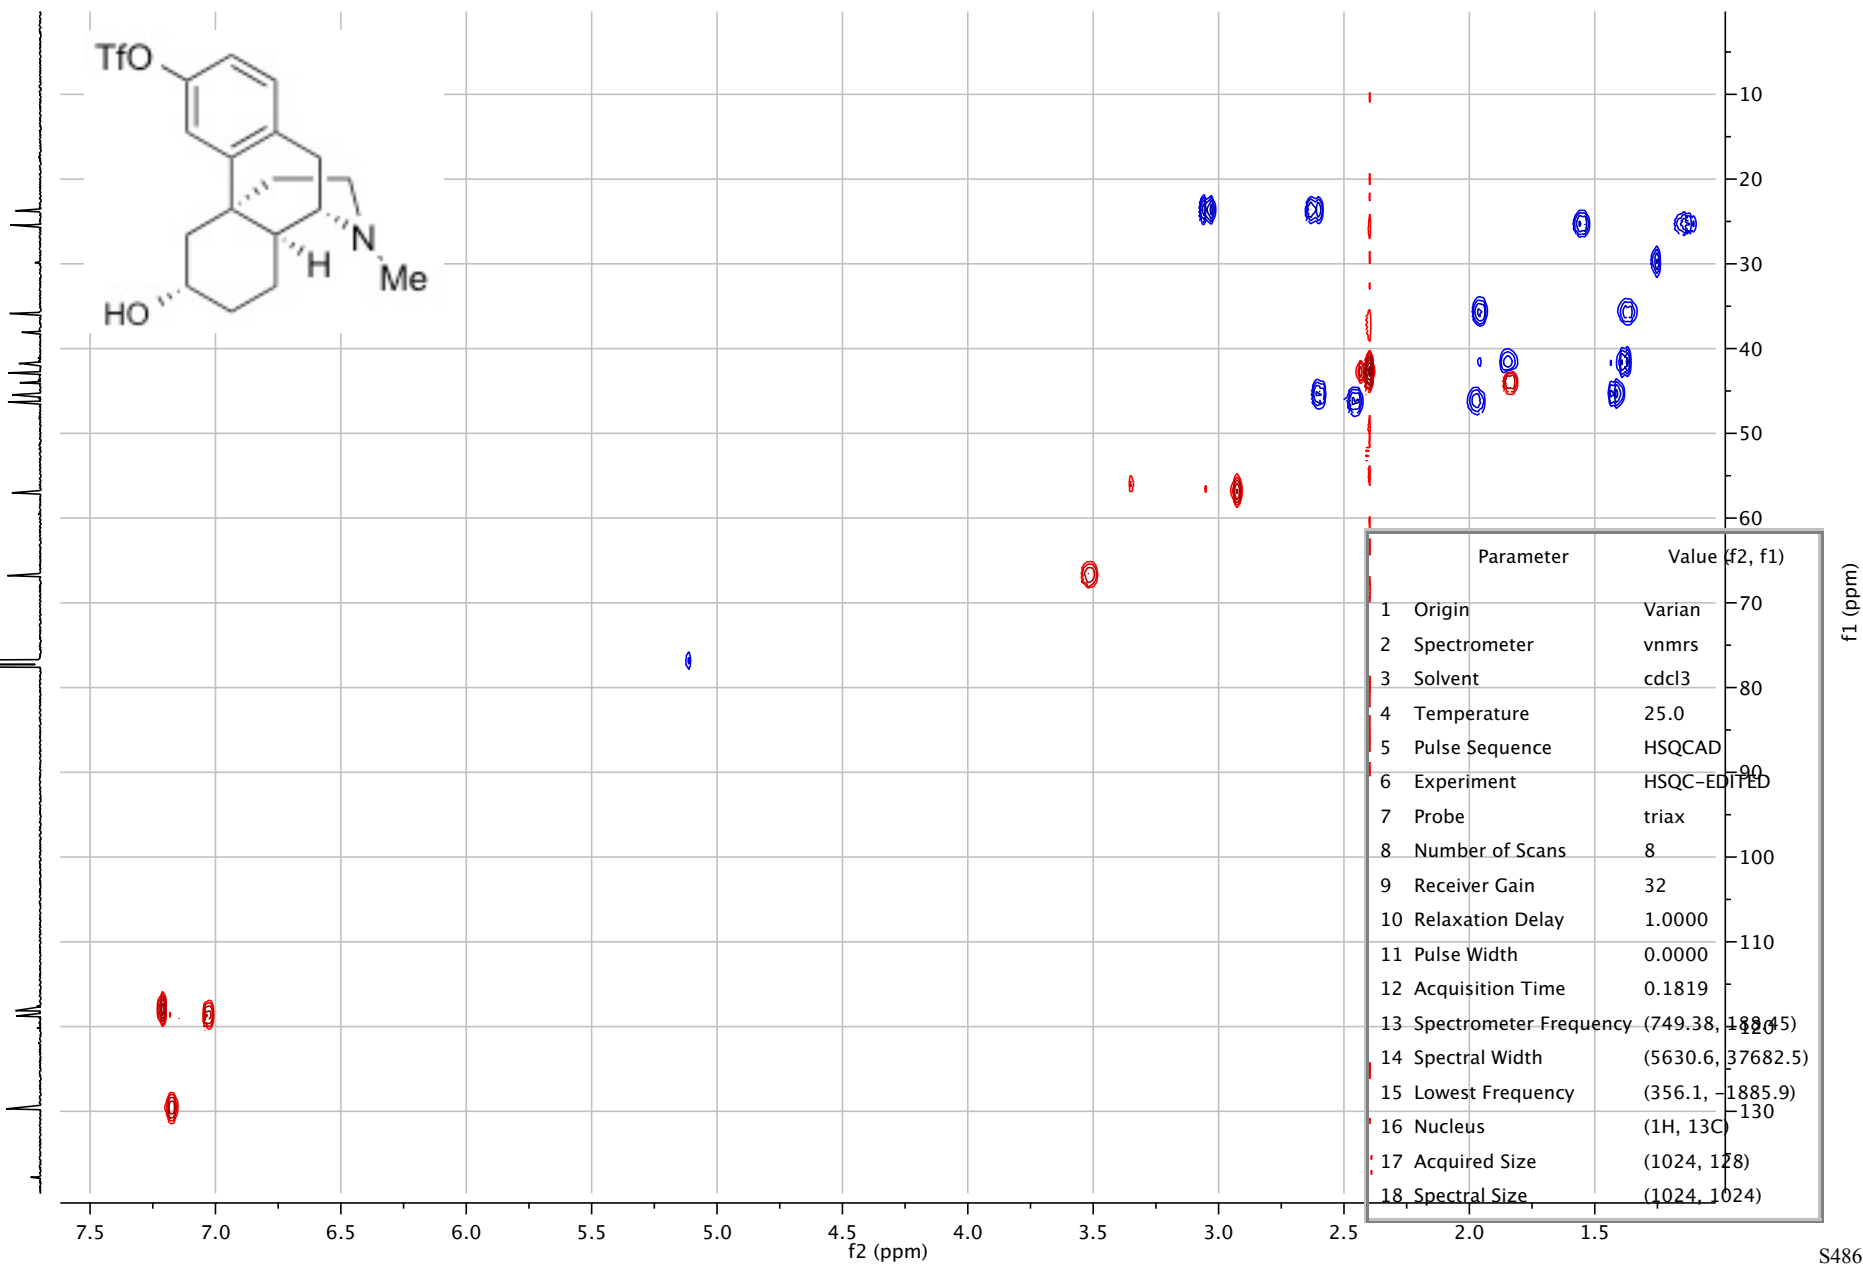

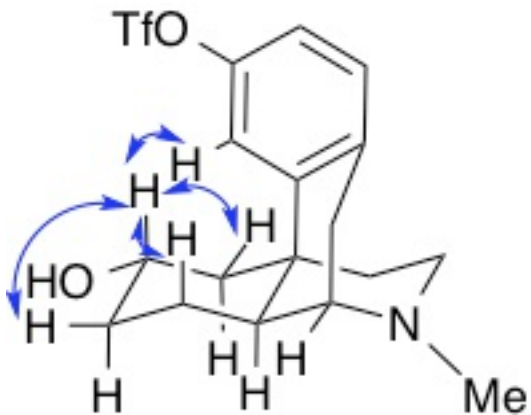

| Parameter              | Value          |
|------------------------|----------------|
| Origin                 | Varian         |
| Spectrometer           | vnmrs          |
| Solvent                | cdcl3          |
| Temperature            | 25.0           |
| Pulse Sequence         | NOESY1D        |
| Experiment             | 1D-NOESY       |
| Probe                  | triax          |
| Number of Scans        | 128            |
| Receiver Gain          | 32             |
| Relaxation Delay       | 1.0000         |
| Pulse Width            | 0.0000         |
| Acquisition Time       | 2.9098         |
| Spectrometer Frequency | 749.38         |
| Spectral Width         | 5630.6         |
| Lowest Frequency       | 369.6          |
| Nucleus                | <sup>1</sup> H |
| Acquired Size          | 16384          |
| Spectral Size          | 65536          |

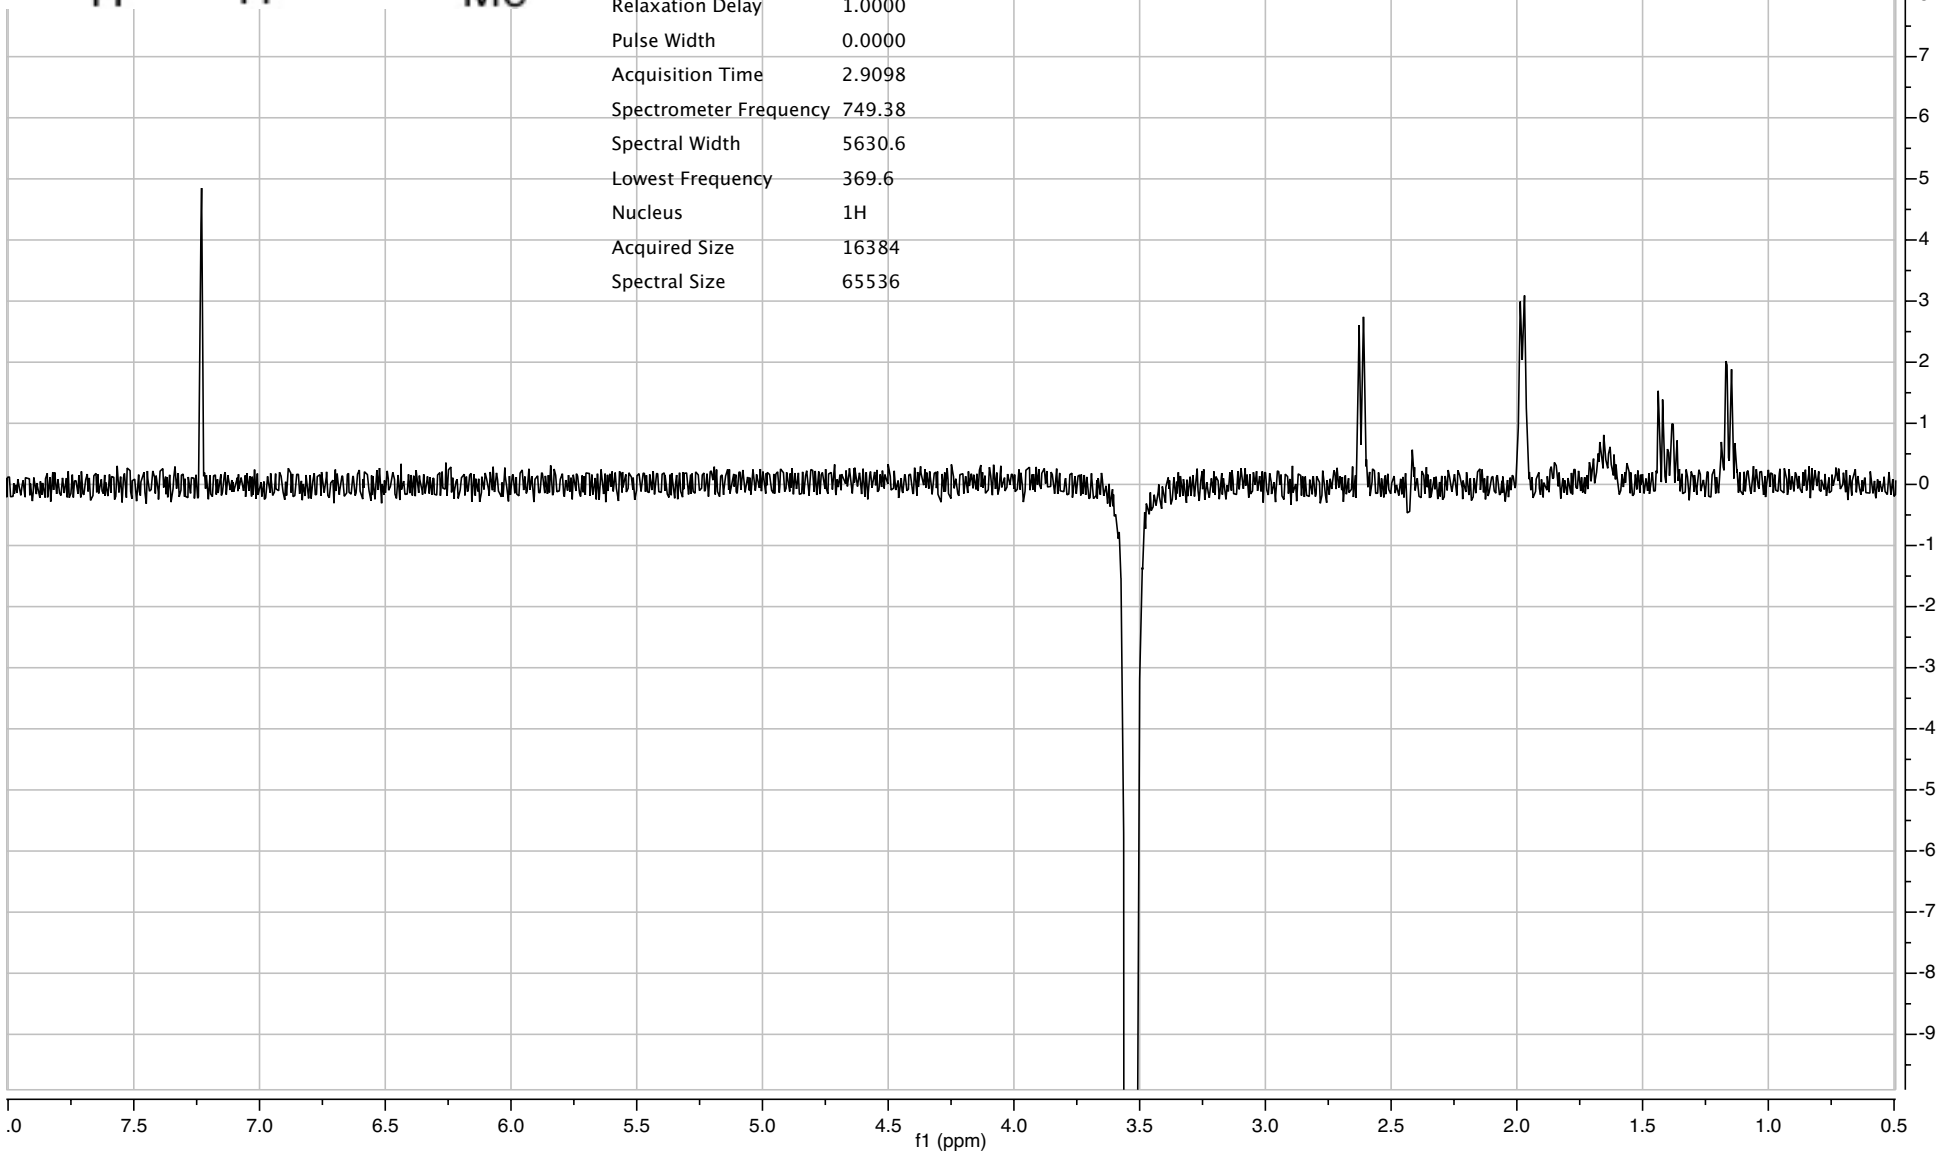



| Parameter              | Value             |
|------------------------|-------------------|
| Origin                 | Varian            |
| Spectrometer           | inova             |
| Solvent                | CDCl <sub>3</sub> |
| Temperature            | 50.0              |
| Pulse Sequence         | s2pul             |
| Experiment             | 1D                |
| Probe                  | hcn               |
| Number of Scans        | 16                |
| Receiver Gain          | 32                |
| Relaxation Delay       | 2.0000            |
| Pulse Width            | 0.0000            |
| Acquisition Time       | 4.0960            |
| Spectrometer Frequency | 500.07            |
| Spectral Width         | 8000.0            |
| Lowest Frequency       | -1521.1           |
| Nucleus                | <sup>1</sup> H    |
| Acquired Size          | 32768             |
| Spectral Size          | 65536             |

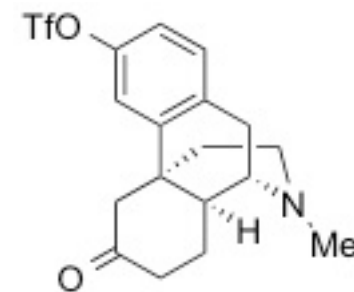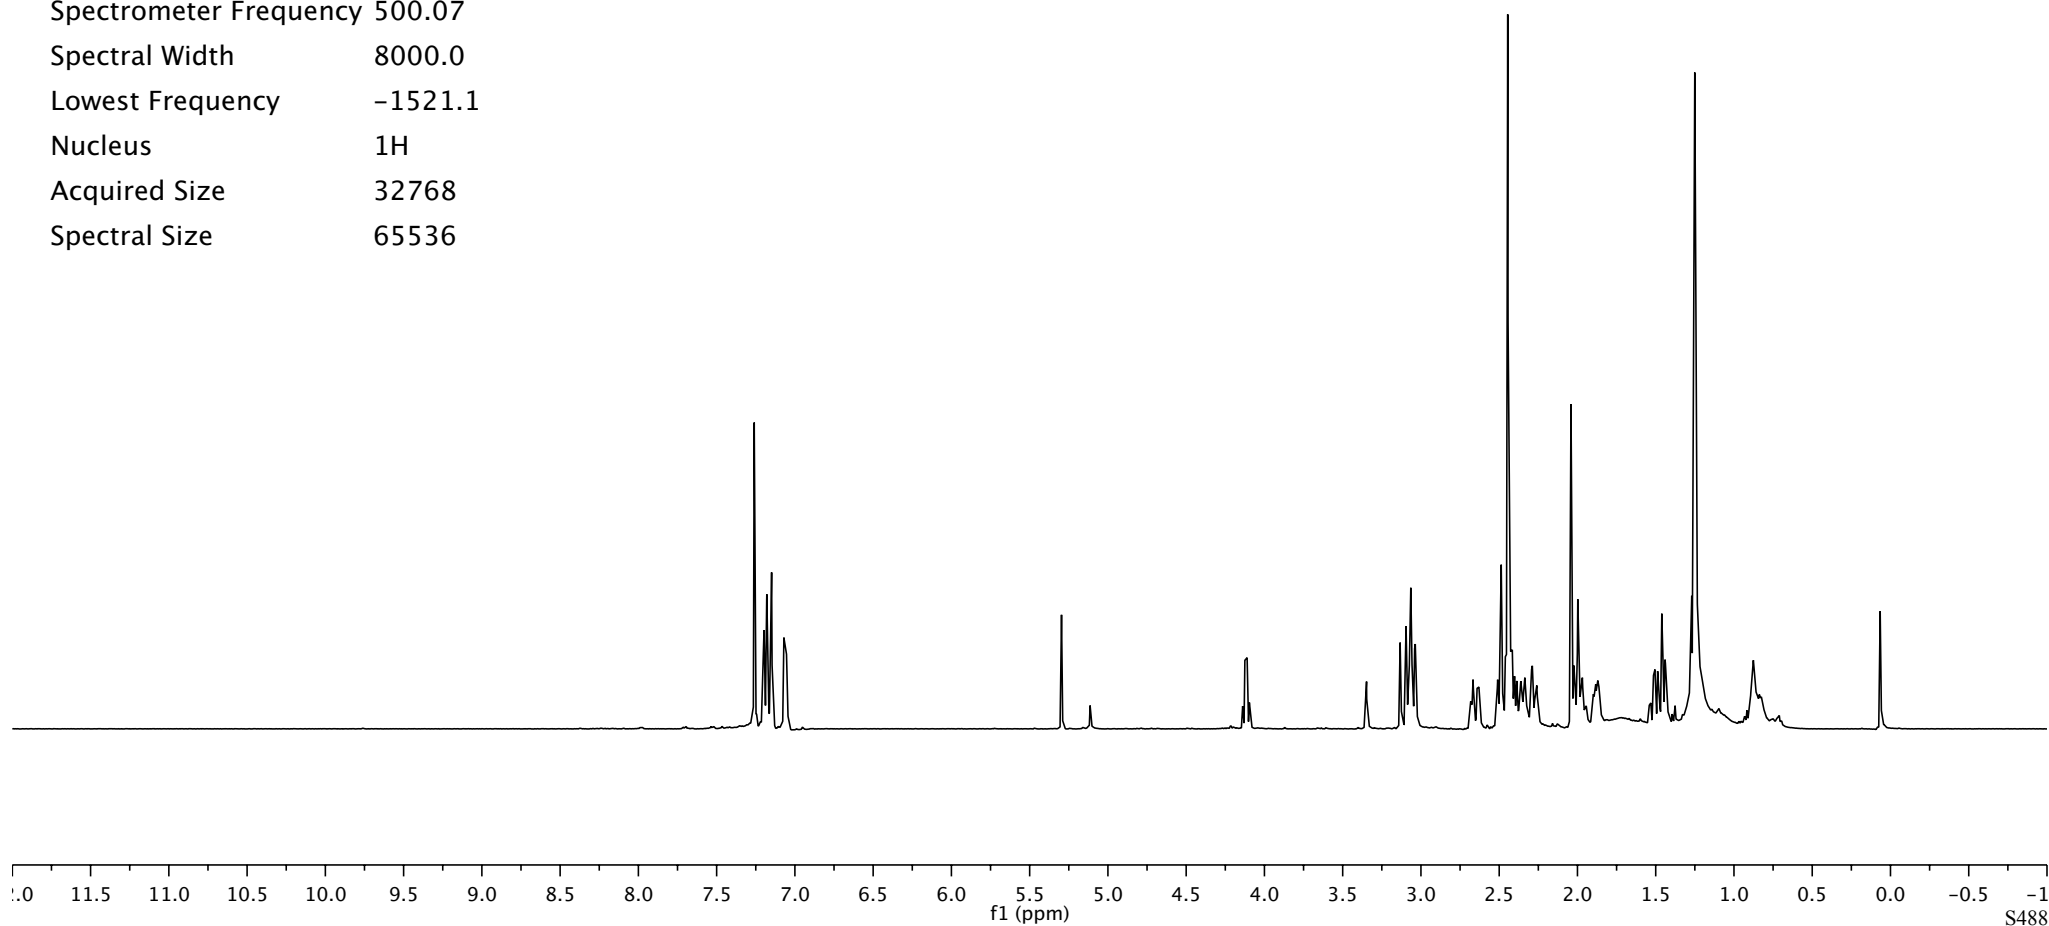

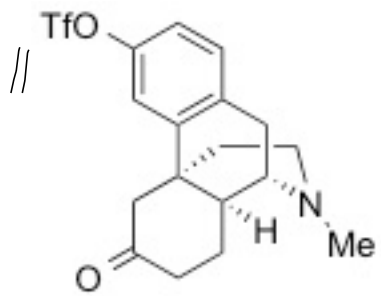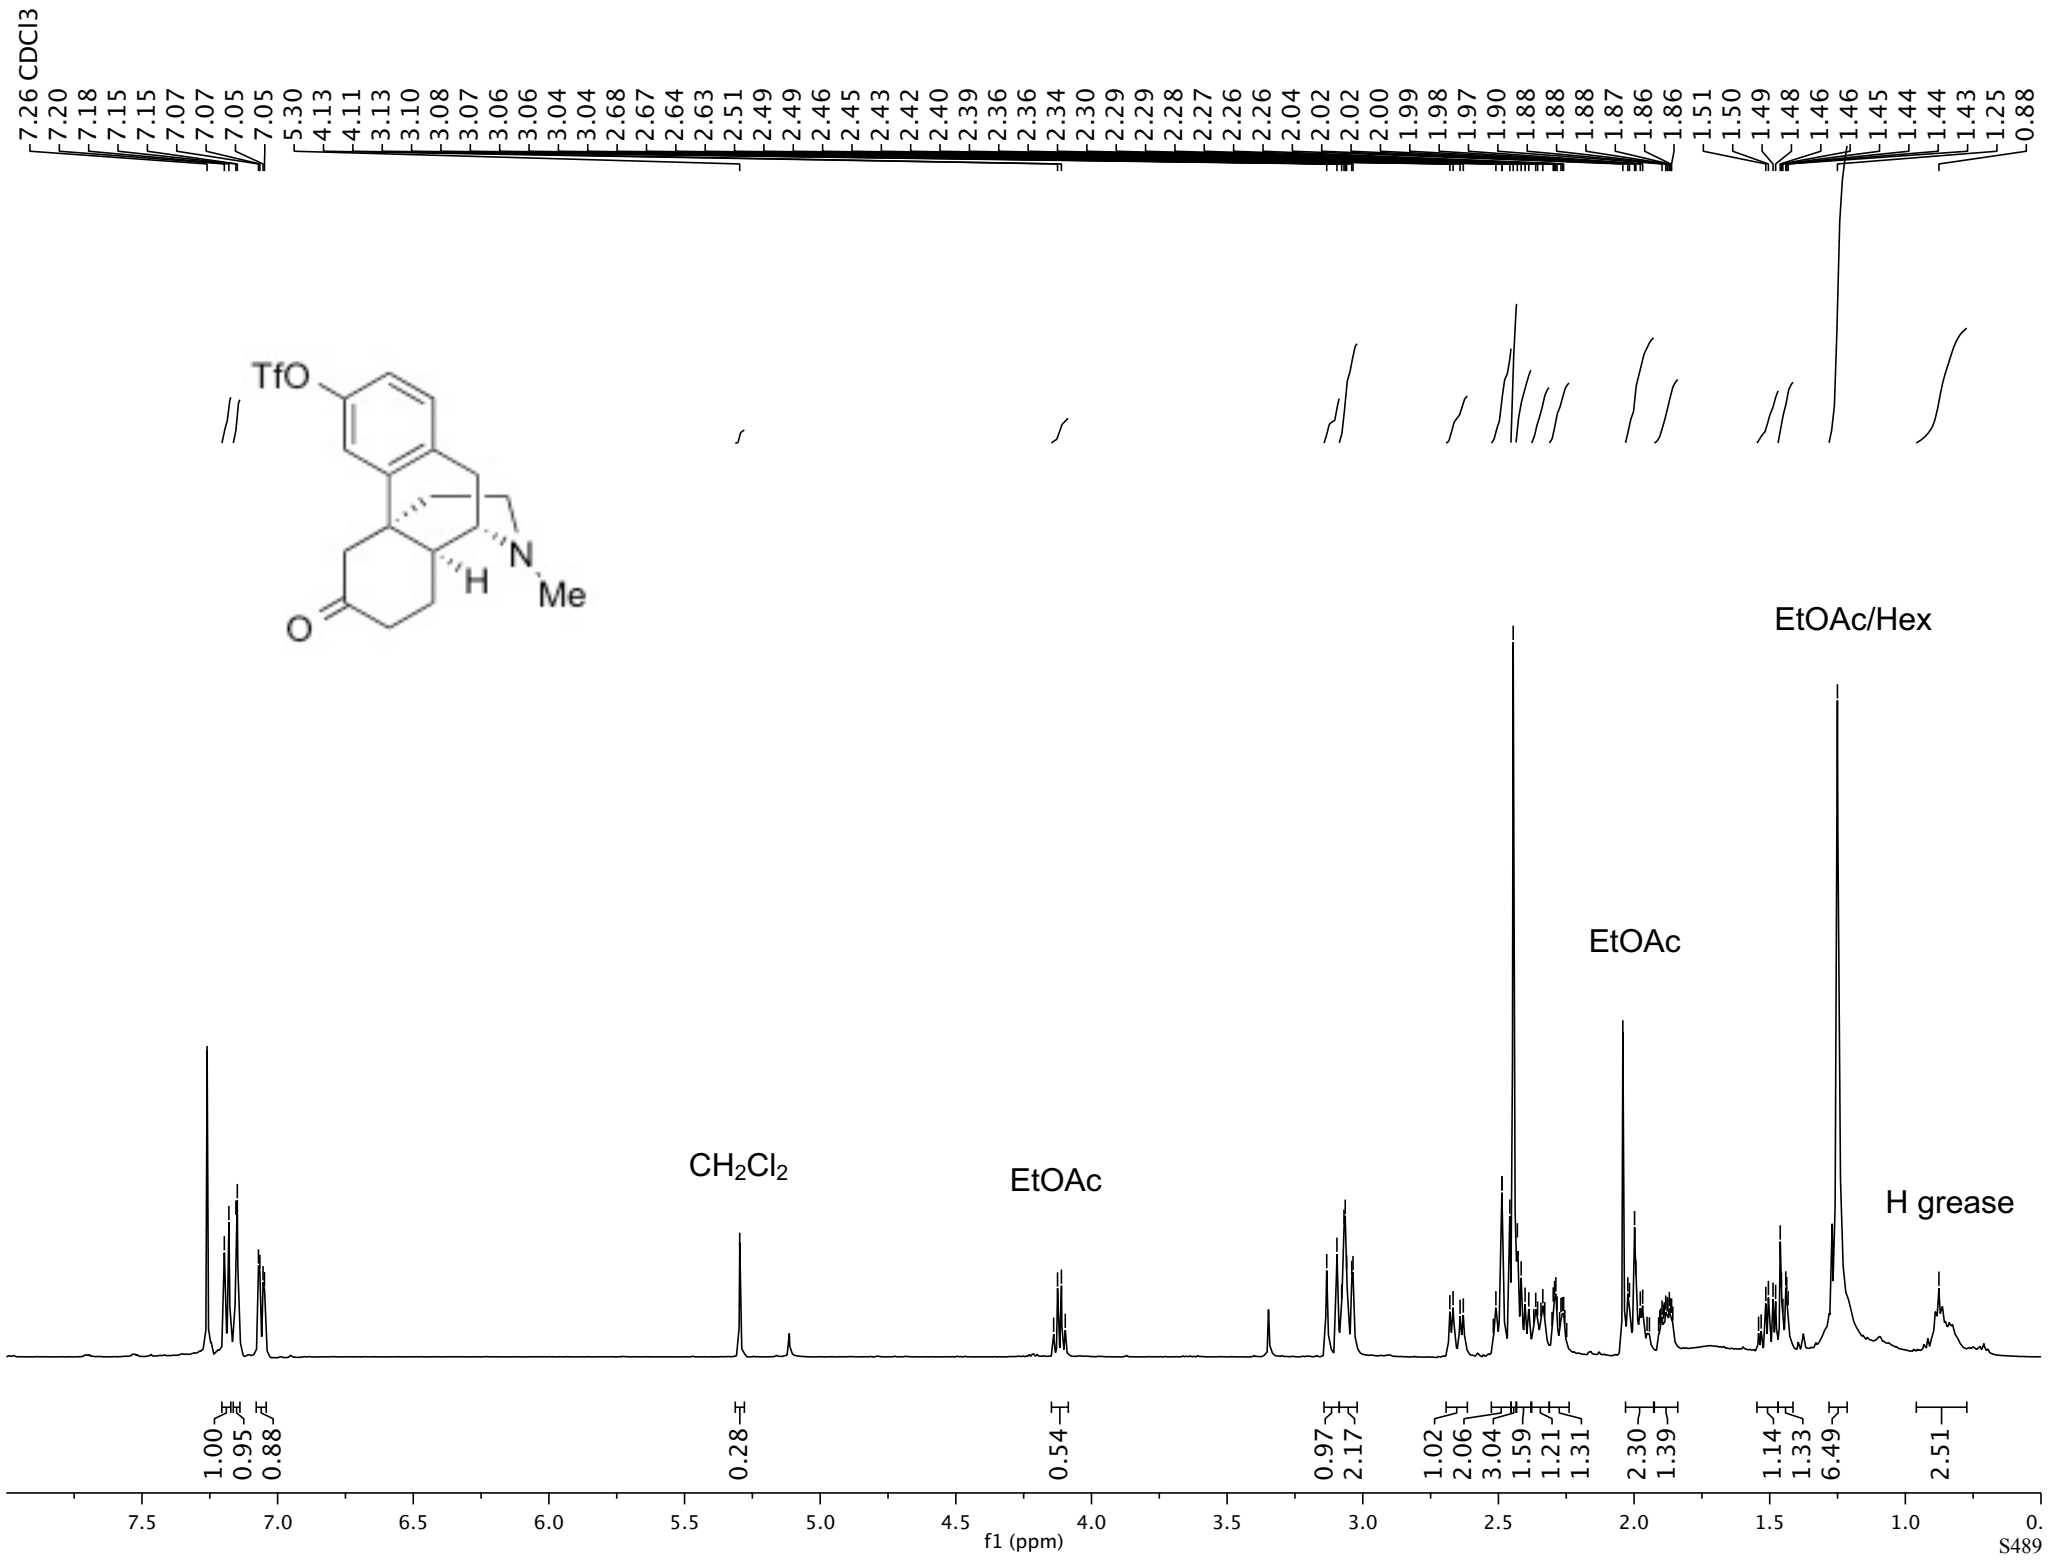

| Parameter              | Value   |
|------------------------|---------|
| Origin                 | Varian  |
| Spectrometer           | inova   |
| Solvent                | CDCl3   |
| Temperature            | 50.0    |
| Pulse Sequence         | s2pul   |
| Experiment             | 1D      |
| Probe                  | QUAD    |
| Number of Scans        | 14167   |
| Receiver Gain          | 60      |
| Relaxation Delay       | 2.0000  |
| Pulse Width            | 0.0000  |
| Acquisition Time       | 1.0863  |
| Spectrometer Frequency | 125.66  |
| Spectral Width         | 30165.9 |
| Lowest Frequency       | -1272.5 |
| Nucleus                | 13C     |
| Acquired Size          | 32768   |
| Spectral Size          | 65536   |

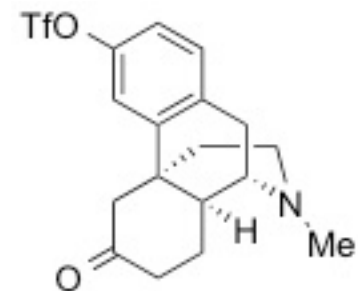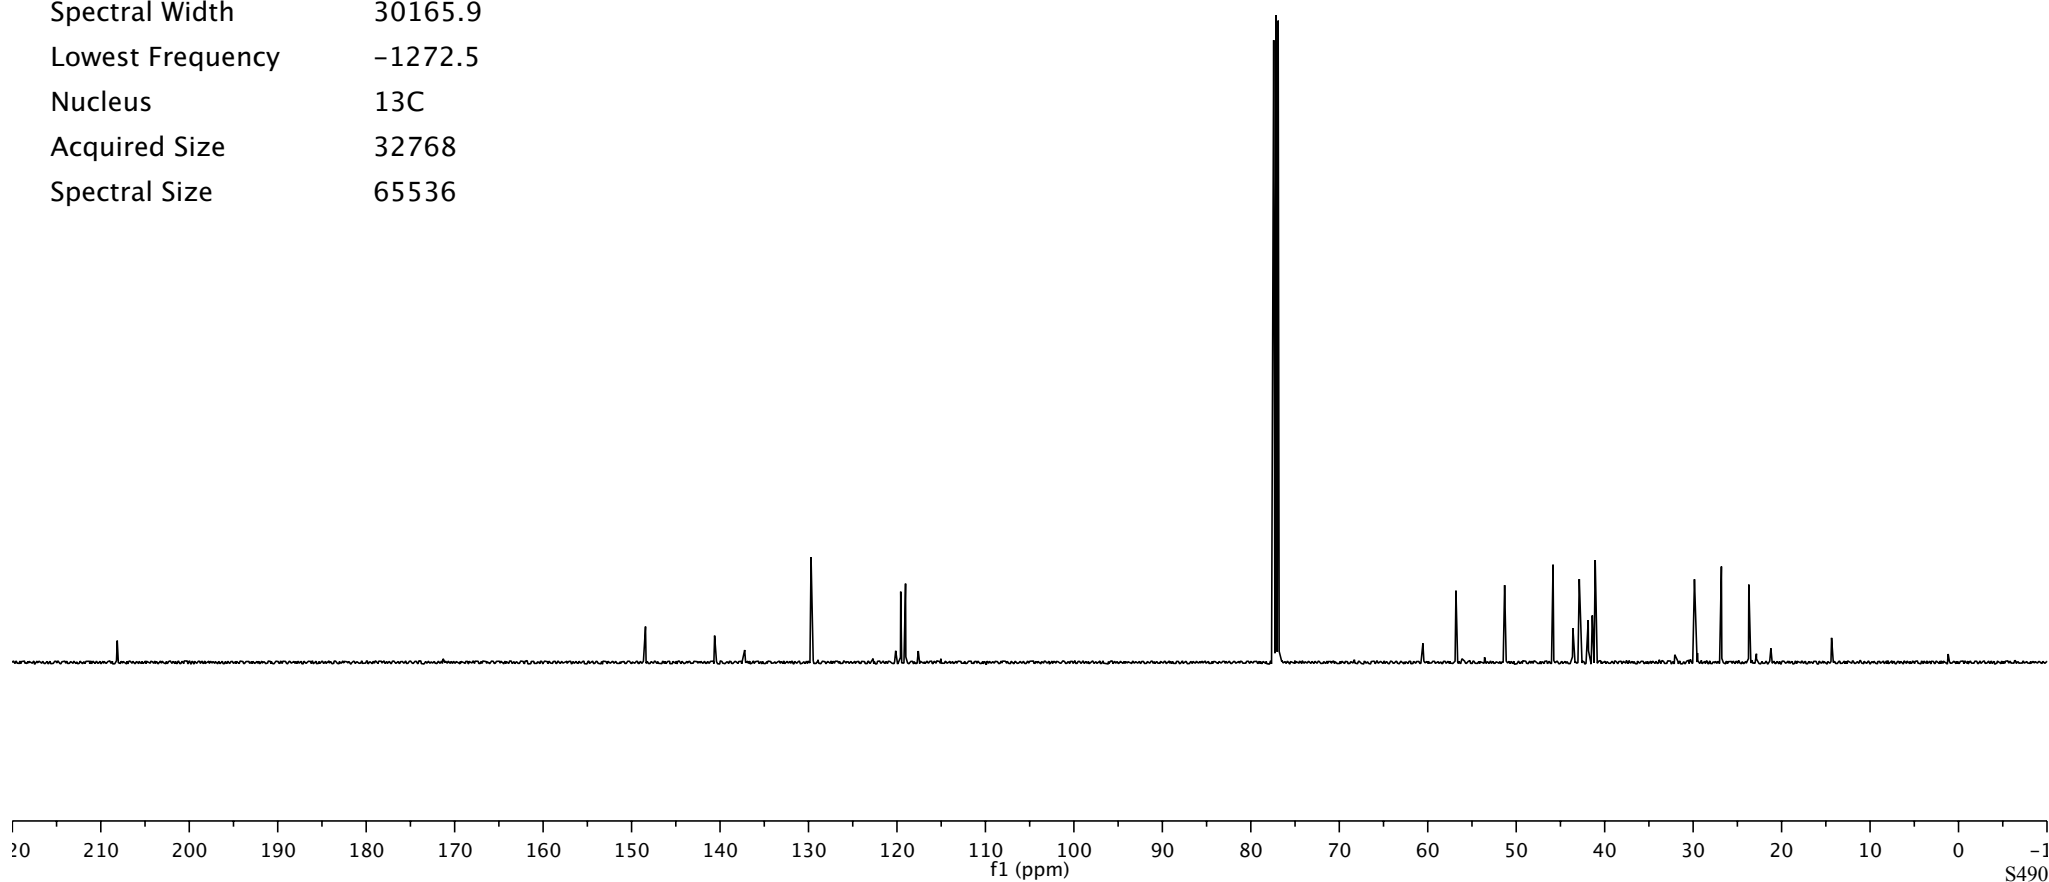

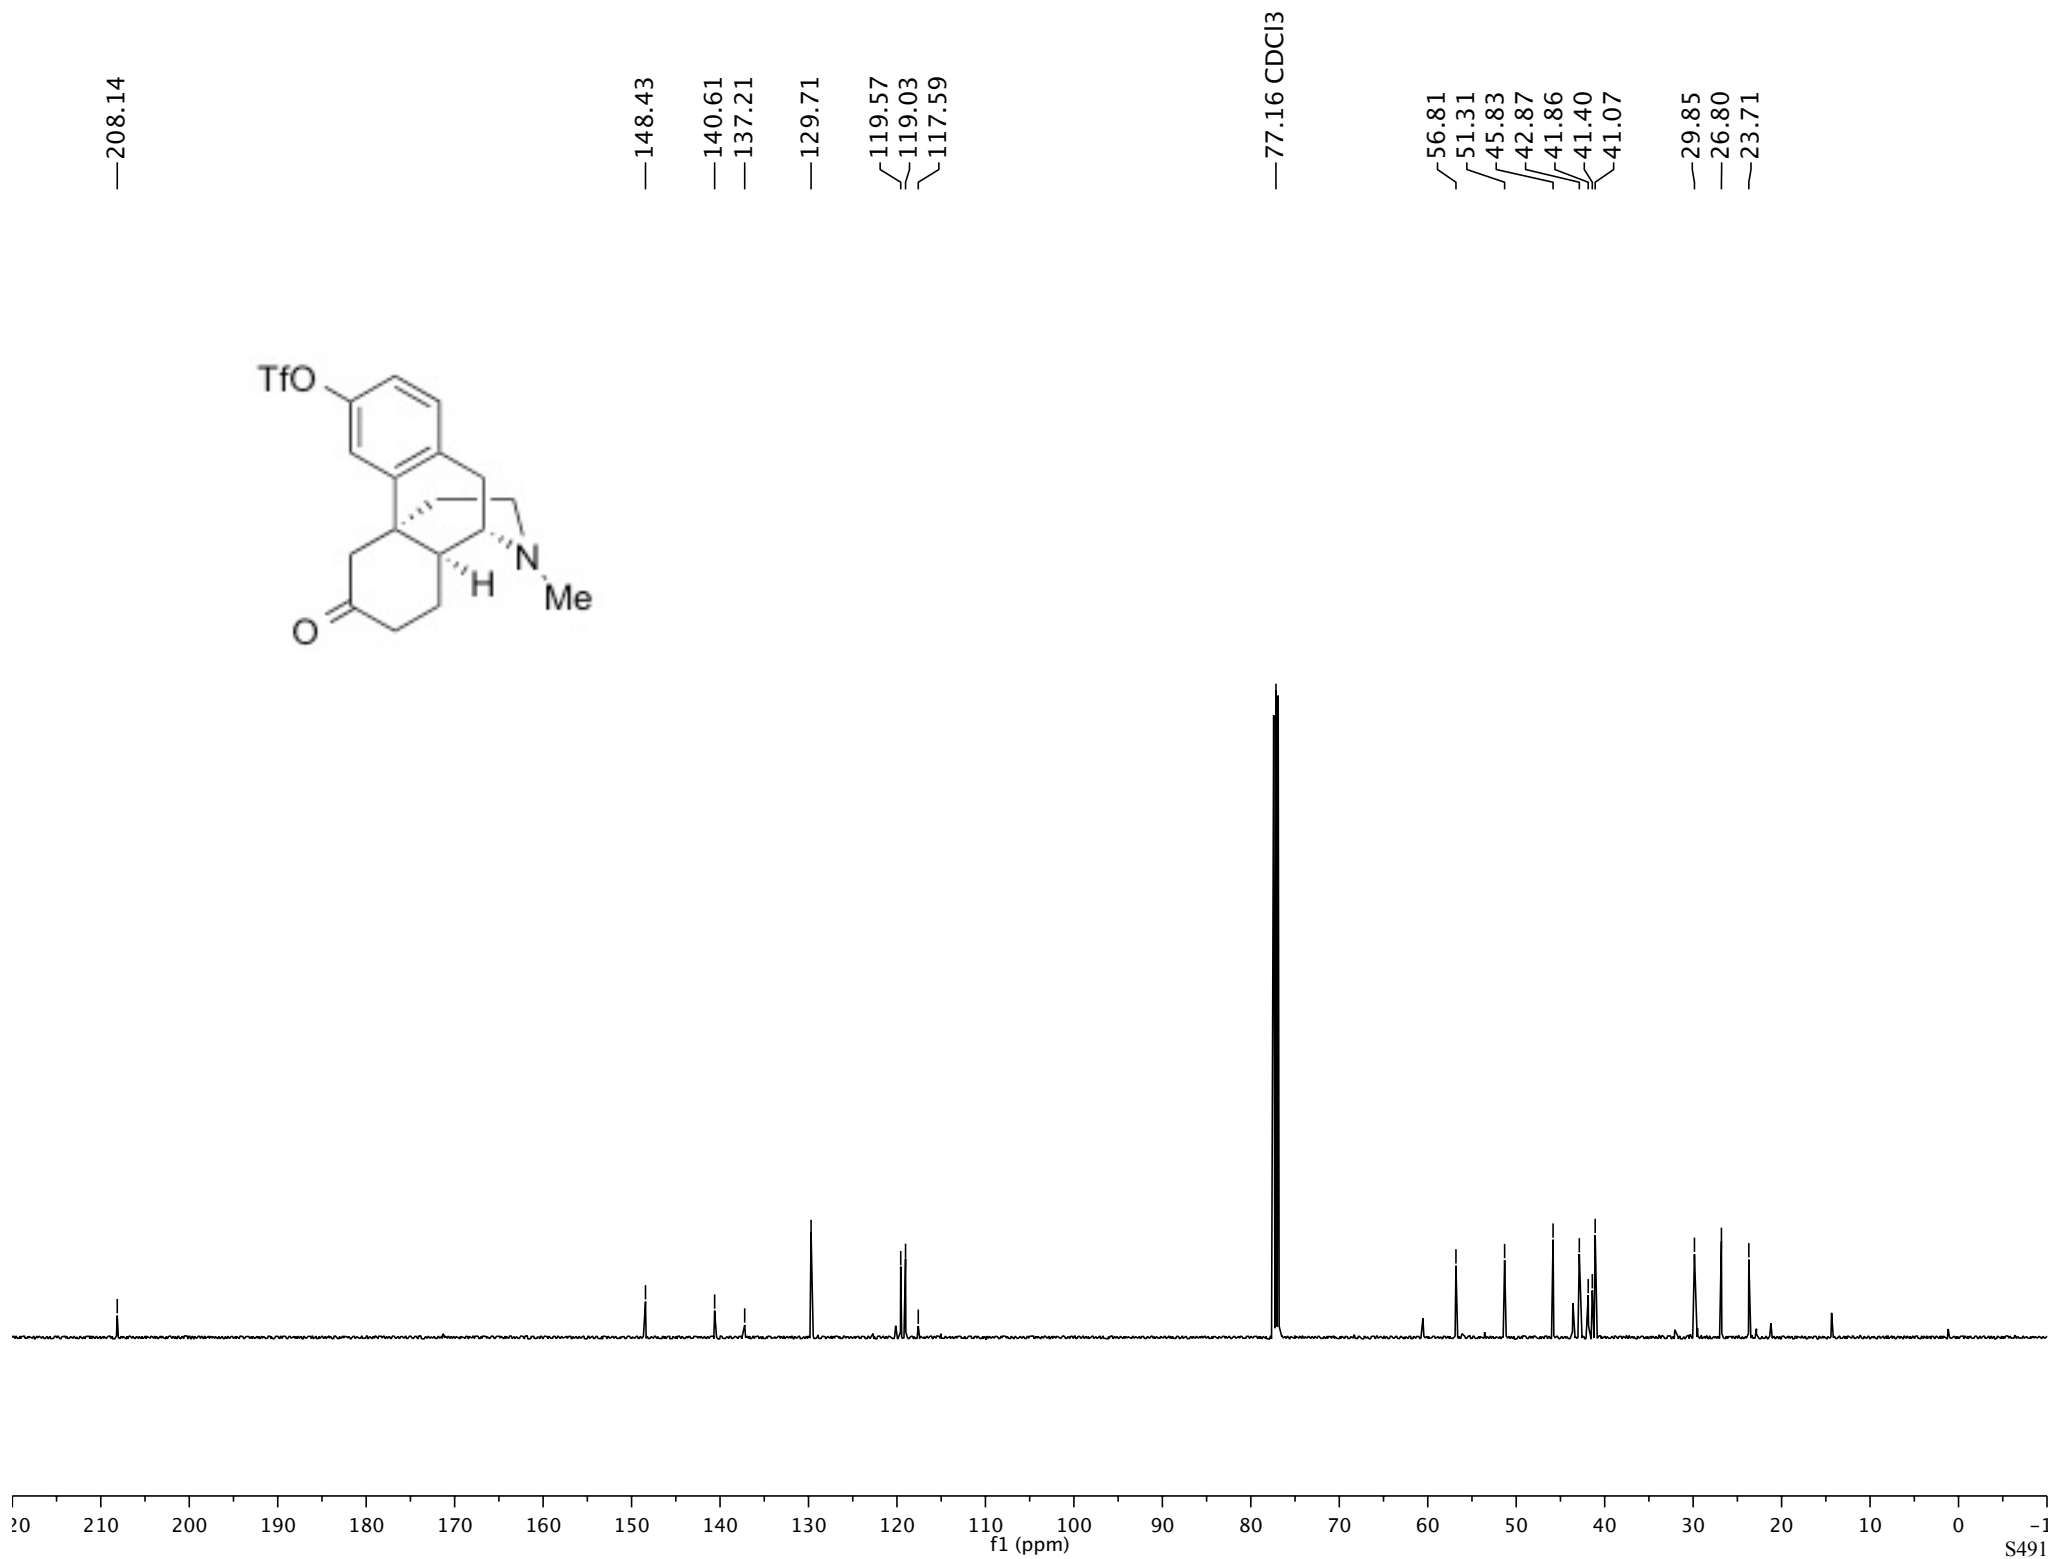

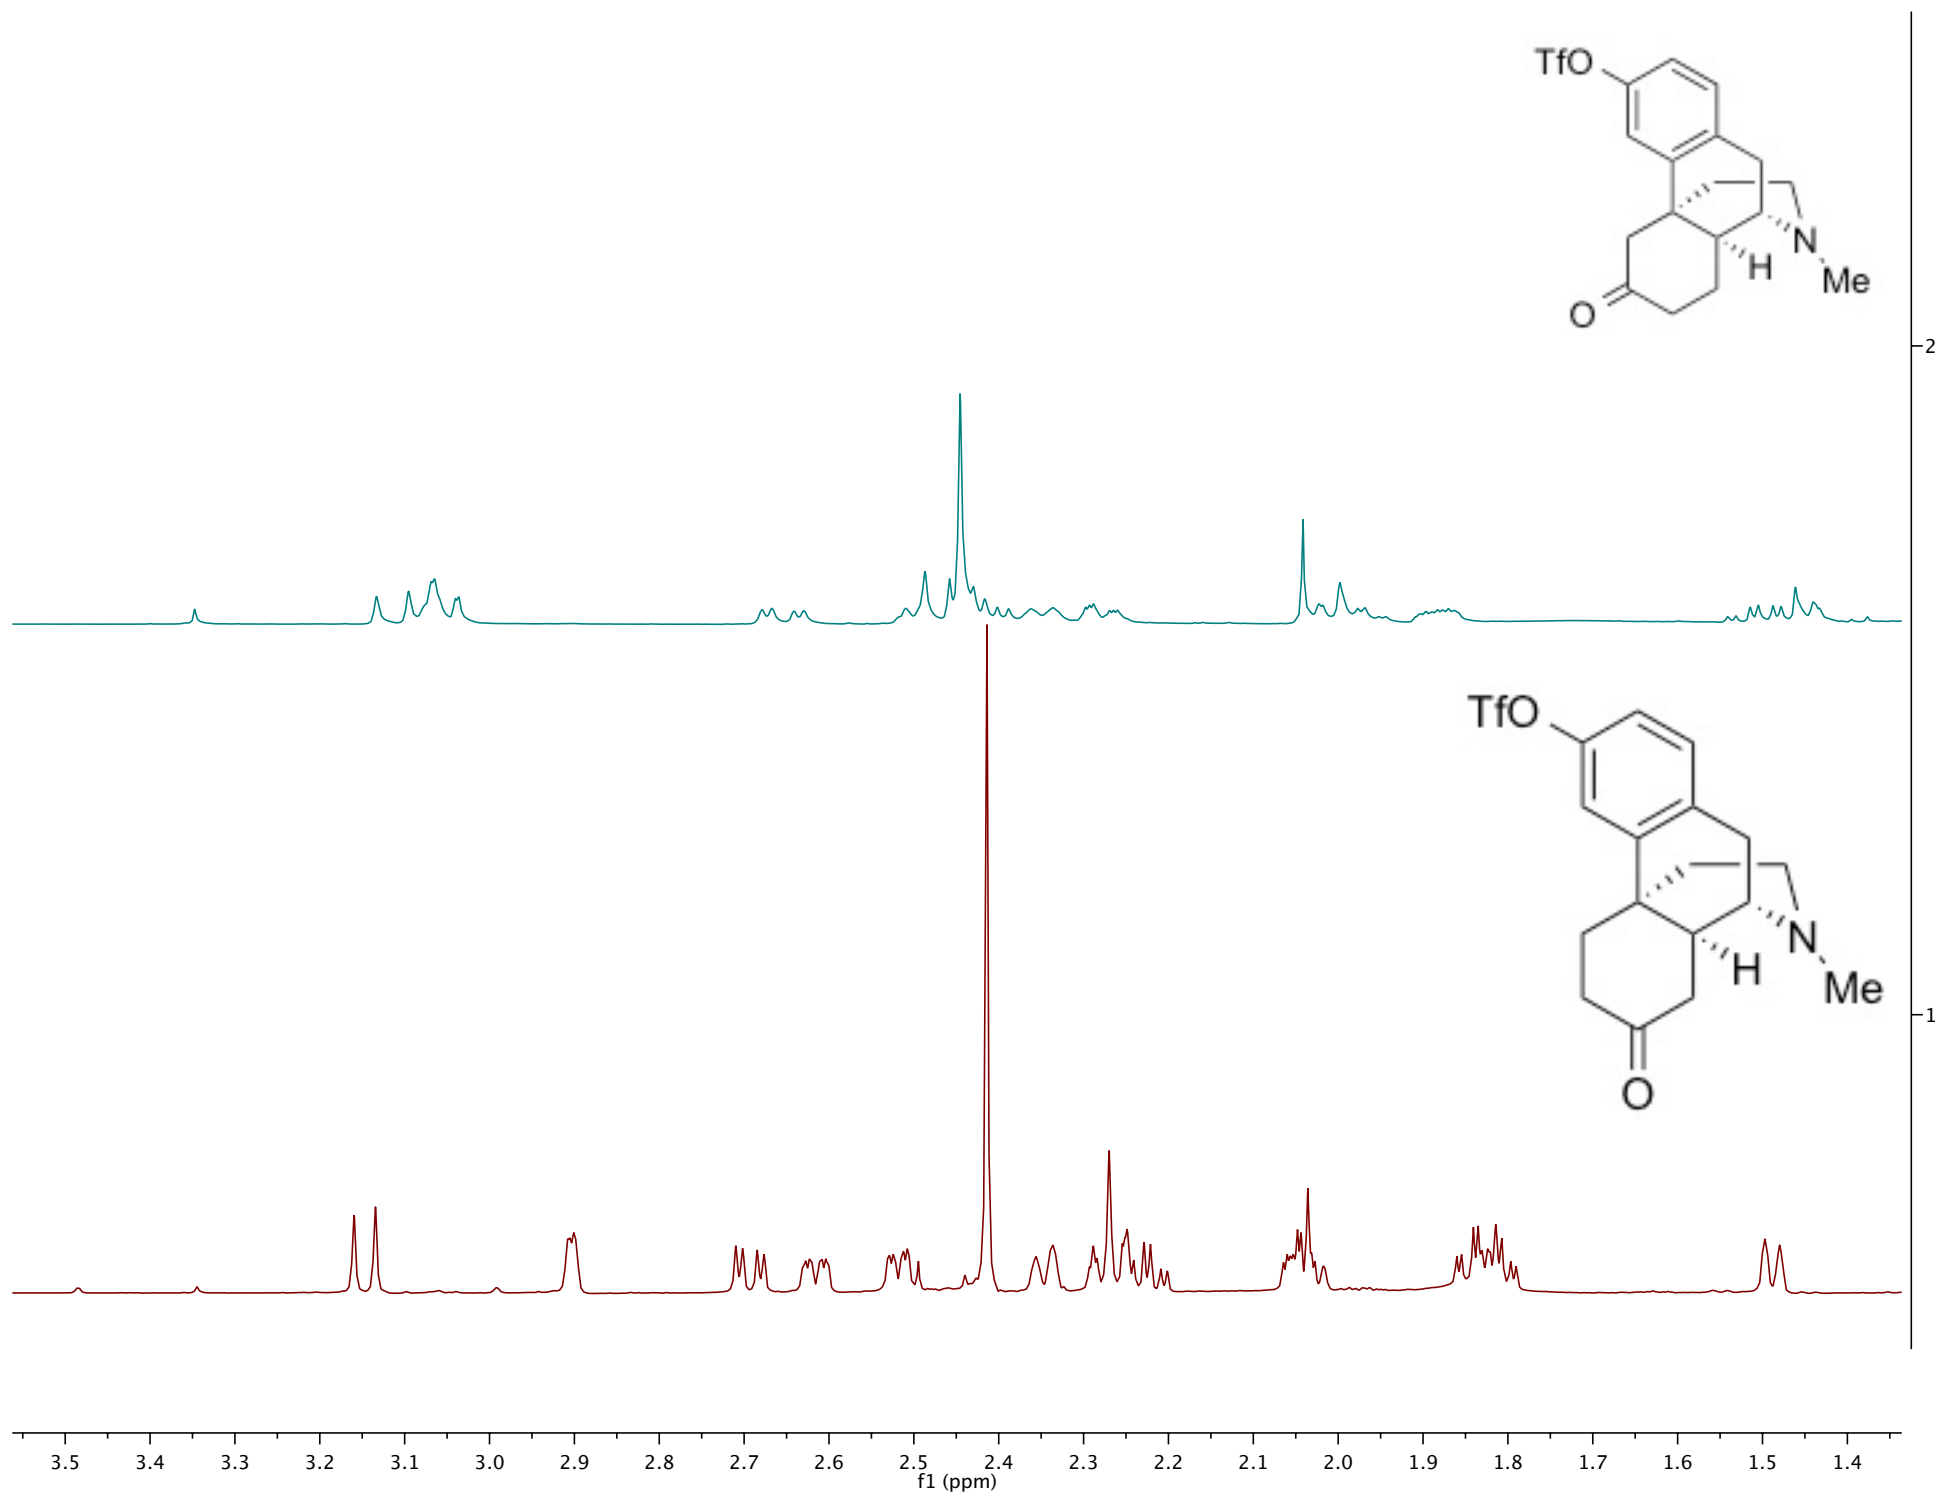

| Parameter              | Value          |
|------------------------|----------------|
| Origin                 | Varian         |
| Spectrometer           | inova          |
| Solvent                | CDCl3          |
| Temperature            | 20.0           |
| Pulse Sequence         | s2pul          |
| Experiment             | 1D             |
| Probe                  | quad94         |
| Receiver Gain          | 60             |
| Relaxation Delay       | 0.0000         |
| Pulse Width            | 0.0000         |
| Acquisition Time       | 4.0960         |
| Spectrometer Frequency | 399.95         |
| Spectral Width         | 8000.0         |
| Lowest Frequency       | -2416.5        |
| Nucleus                | <sup>1</sup> H |
| Acquired Size          | 32768          |
| Spectral Size          | 65536          |

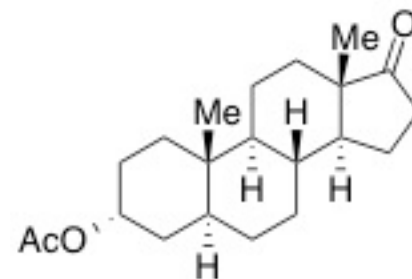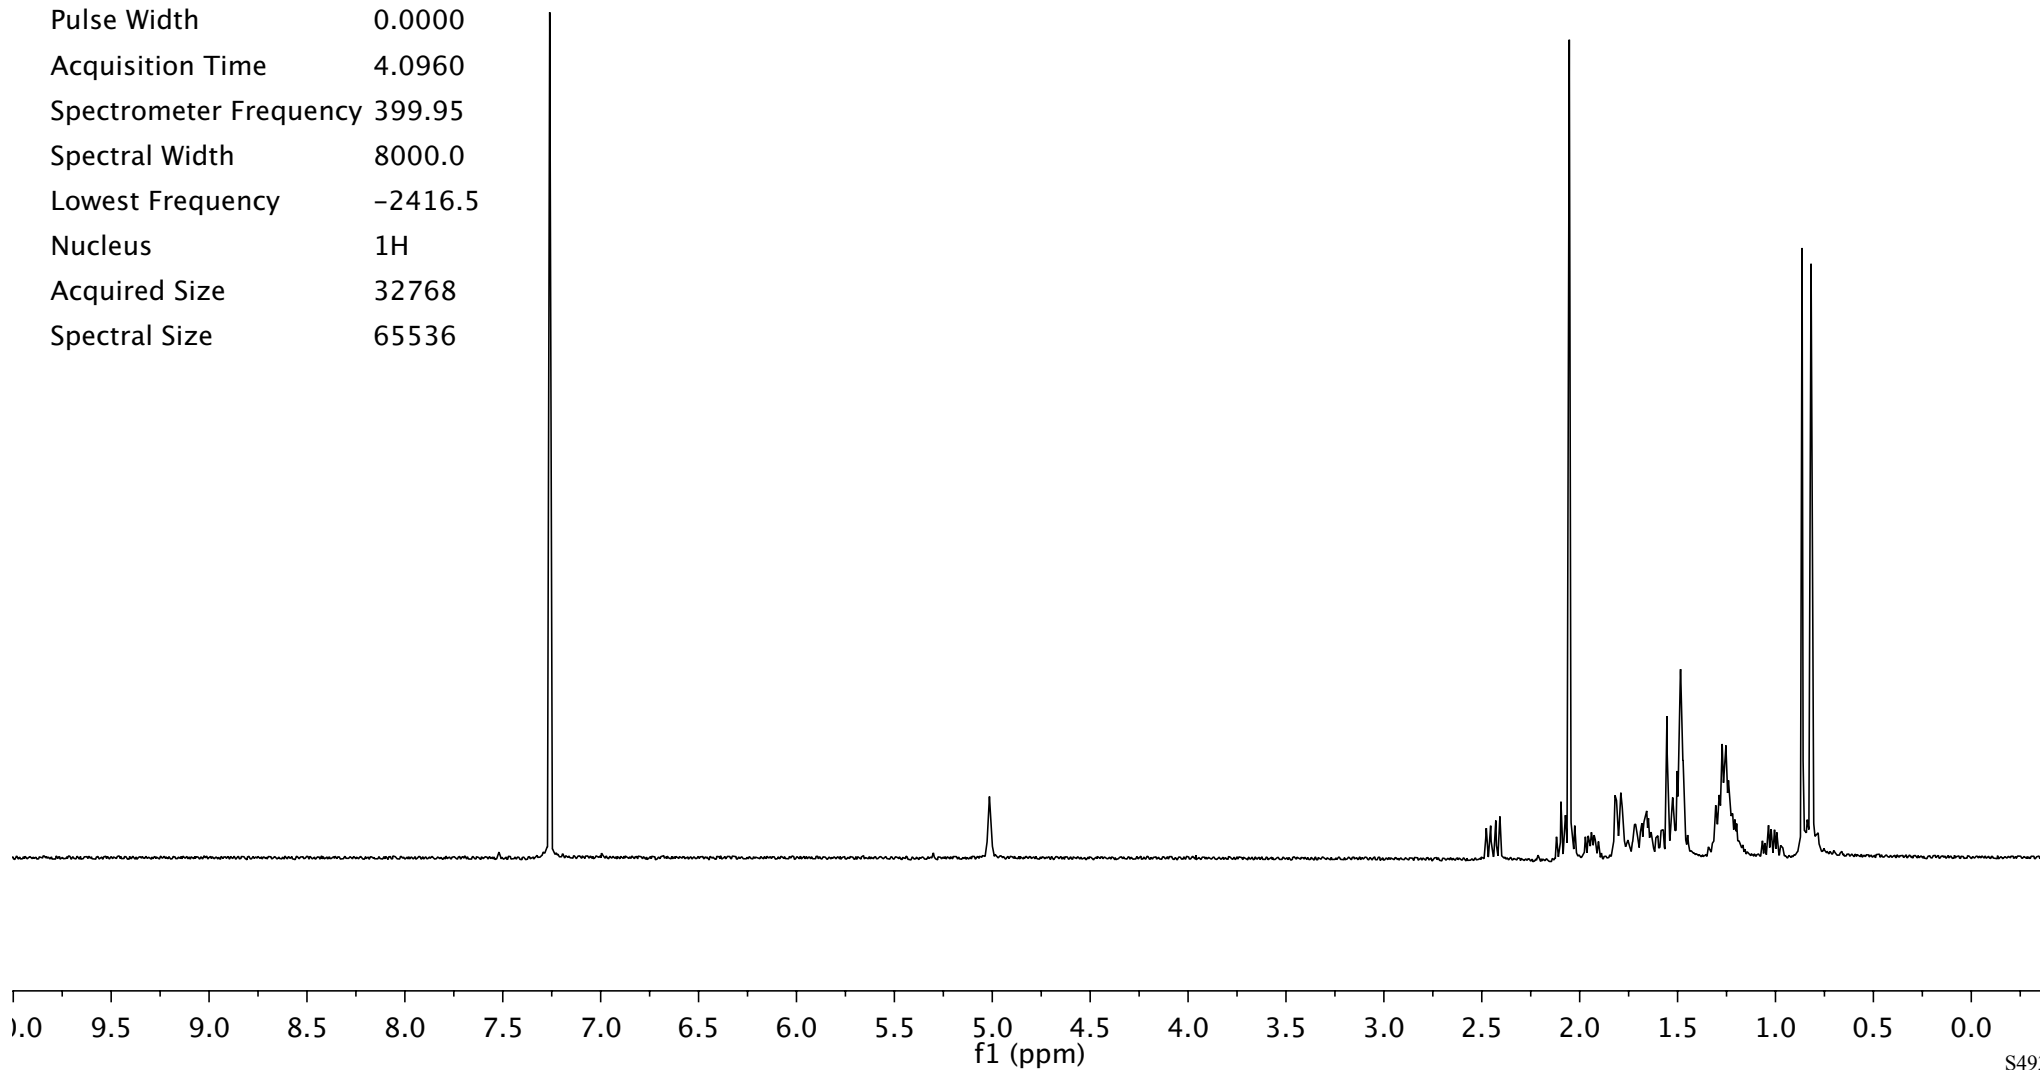

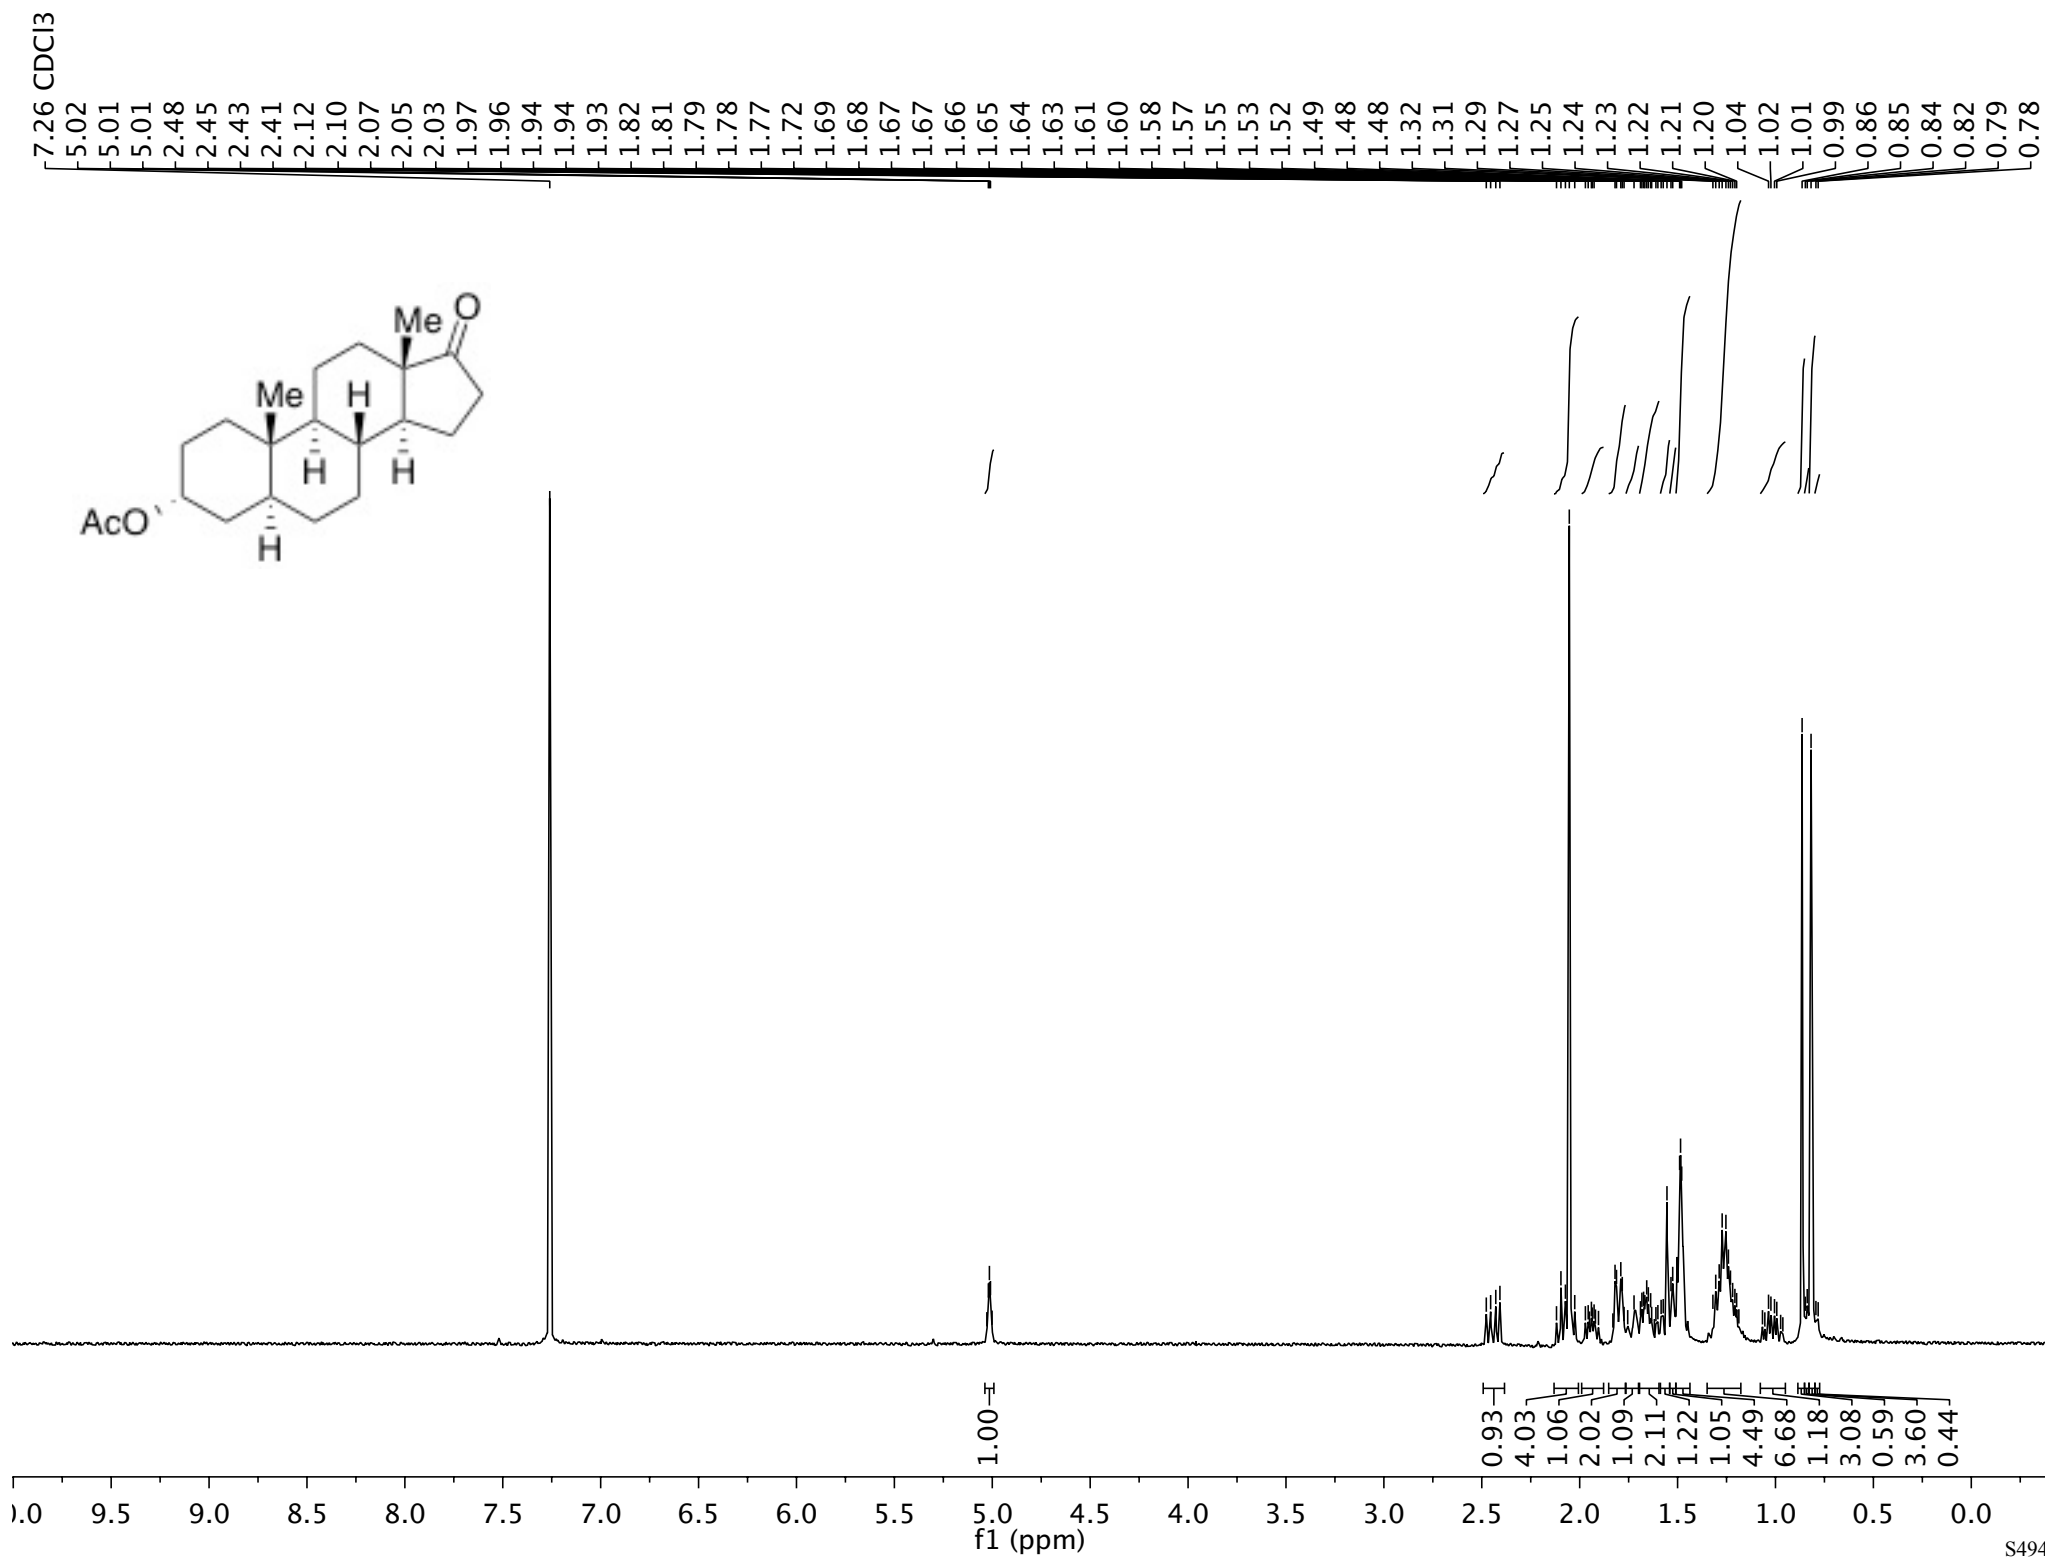

| Parameter              | Value          |
|------------------------|----------------|
| Origin                 | Varian         |
| Spectrometer           | inova          |
| Solvent                | CDCl3          |
| Temperature            | 20.0           |
| Pulse Sequence         | s2pul          |
| Experiment             | 1D             |
| Probe                  | hcn            |
| Receiver Gain          | 30             |
| Relaxation Delay       | 15.0000        |
| Pulse Width            | 0.0000         |
| Acquisition Time       | 4.0960         |
| Spectrometer Frequency | 500.07         |
| Spectral Width         | 8000.0         |
| Lowest Frequency       | -1510.6        |
| Nucleus                | <sup>1</sup> H |
| Acquired Size          | 32768          |
| Spectral Size          | 65536          |

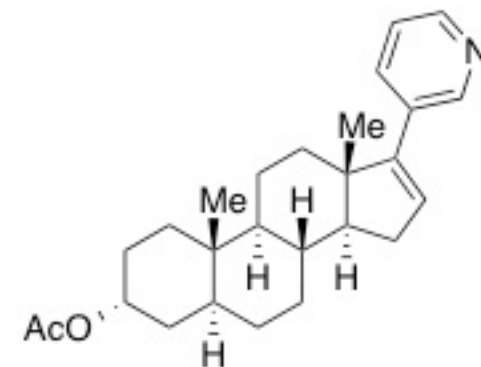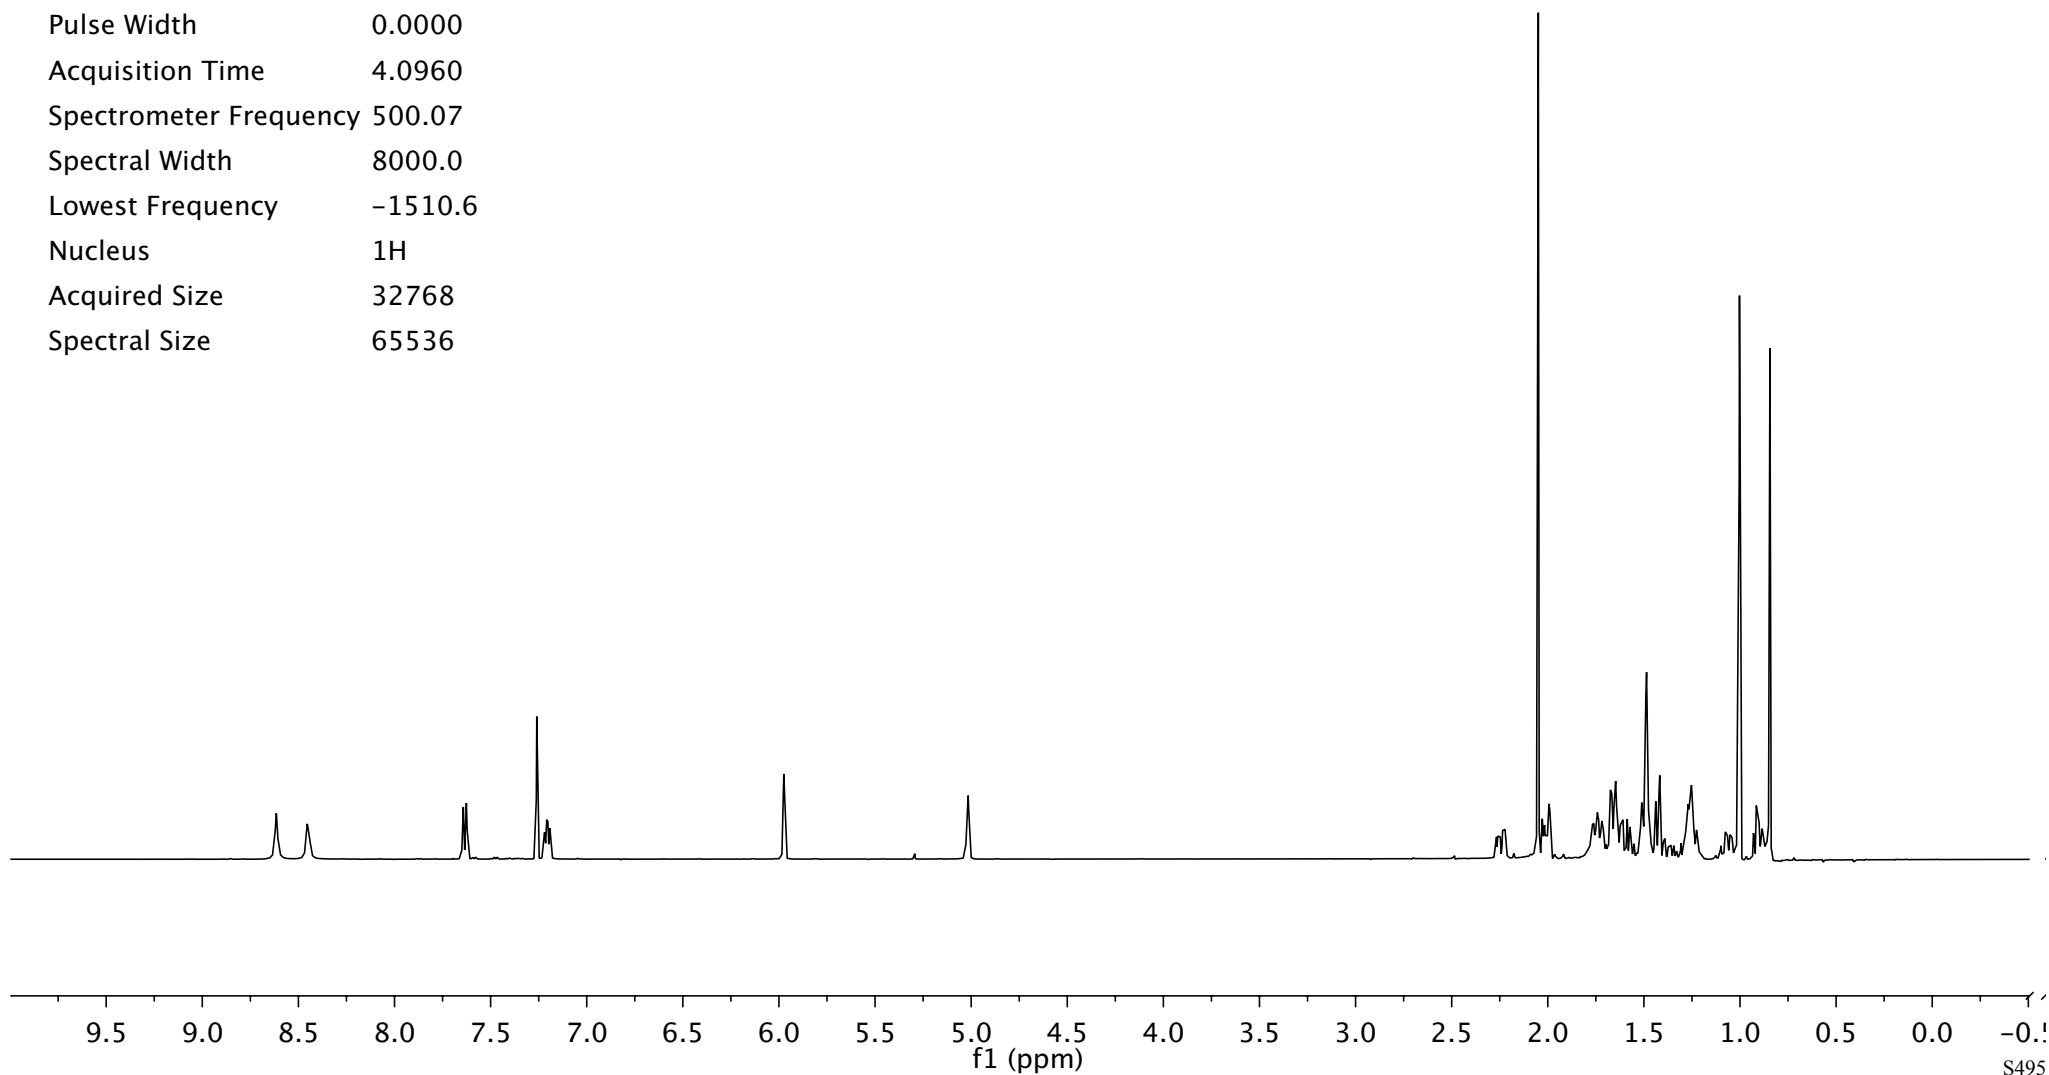



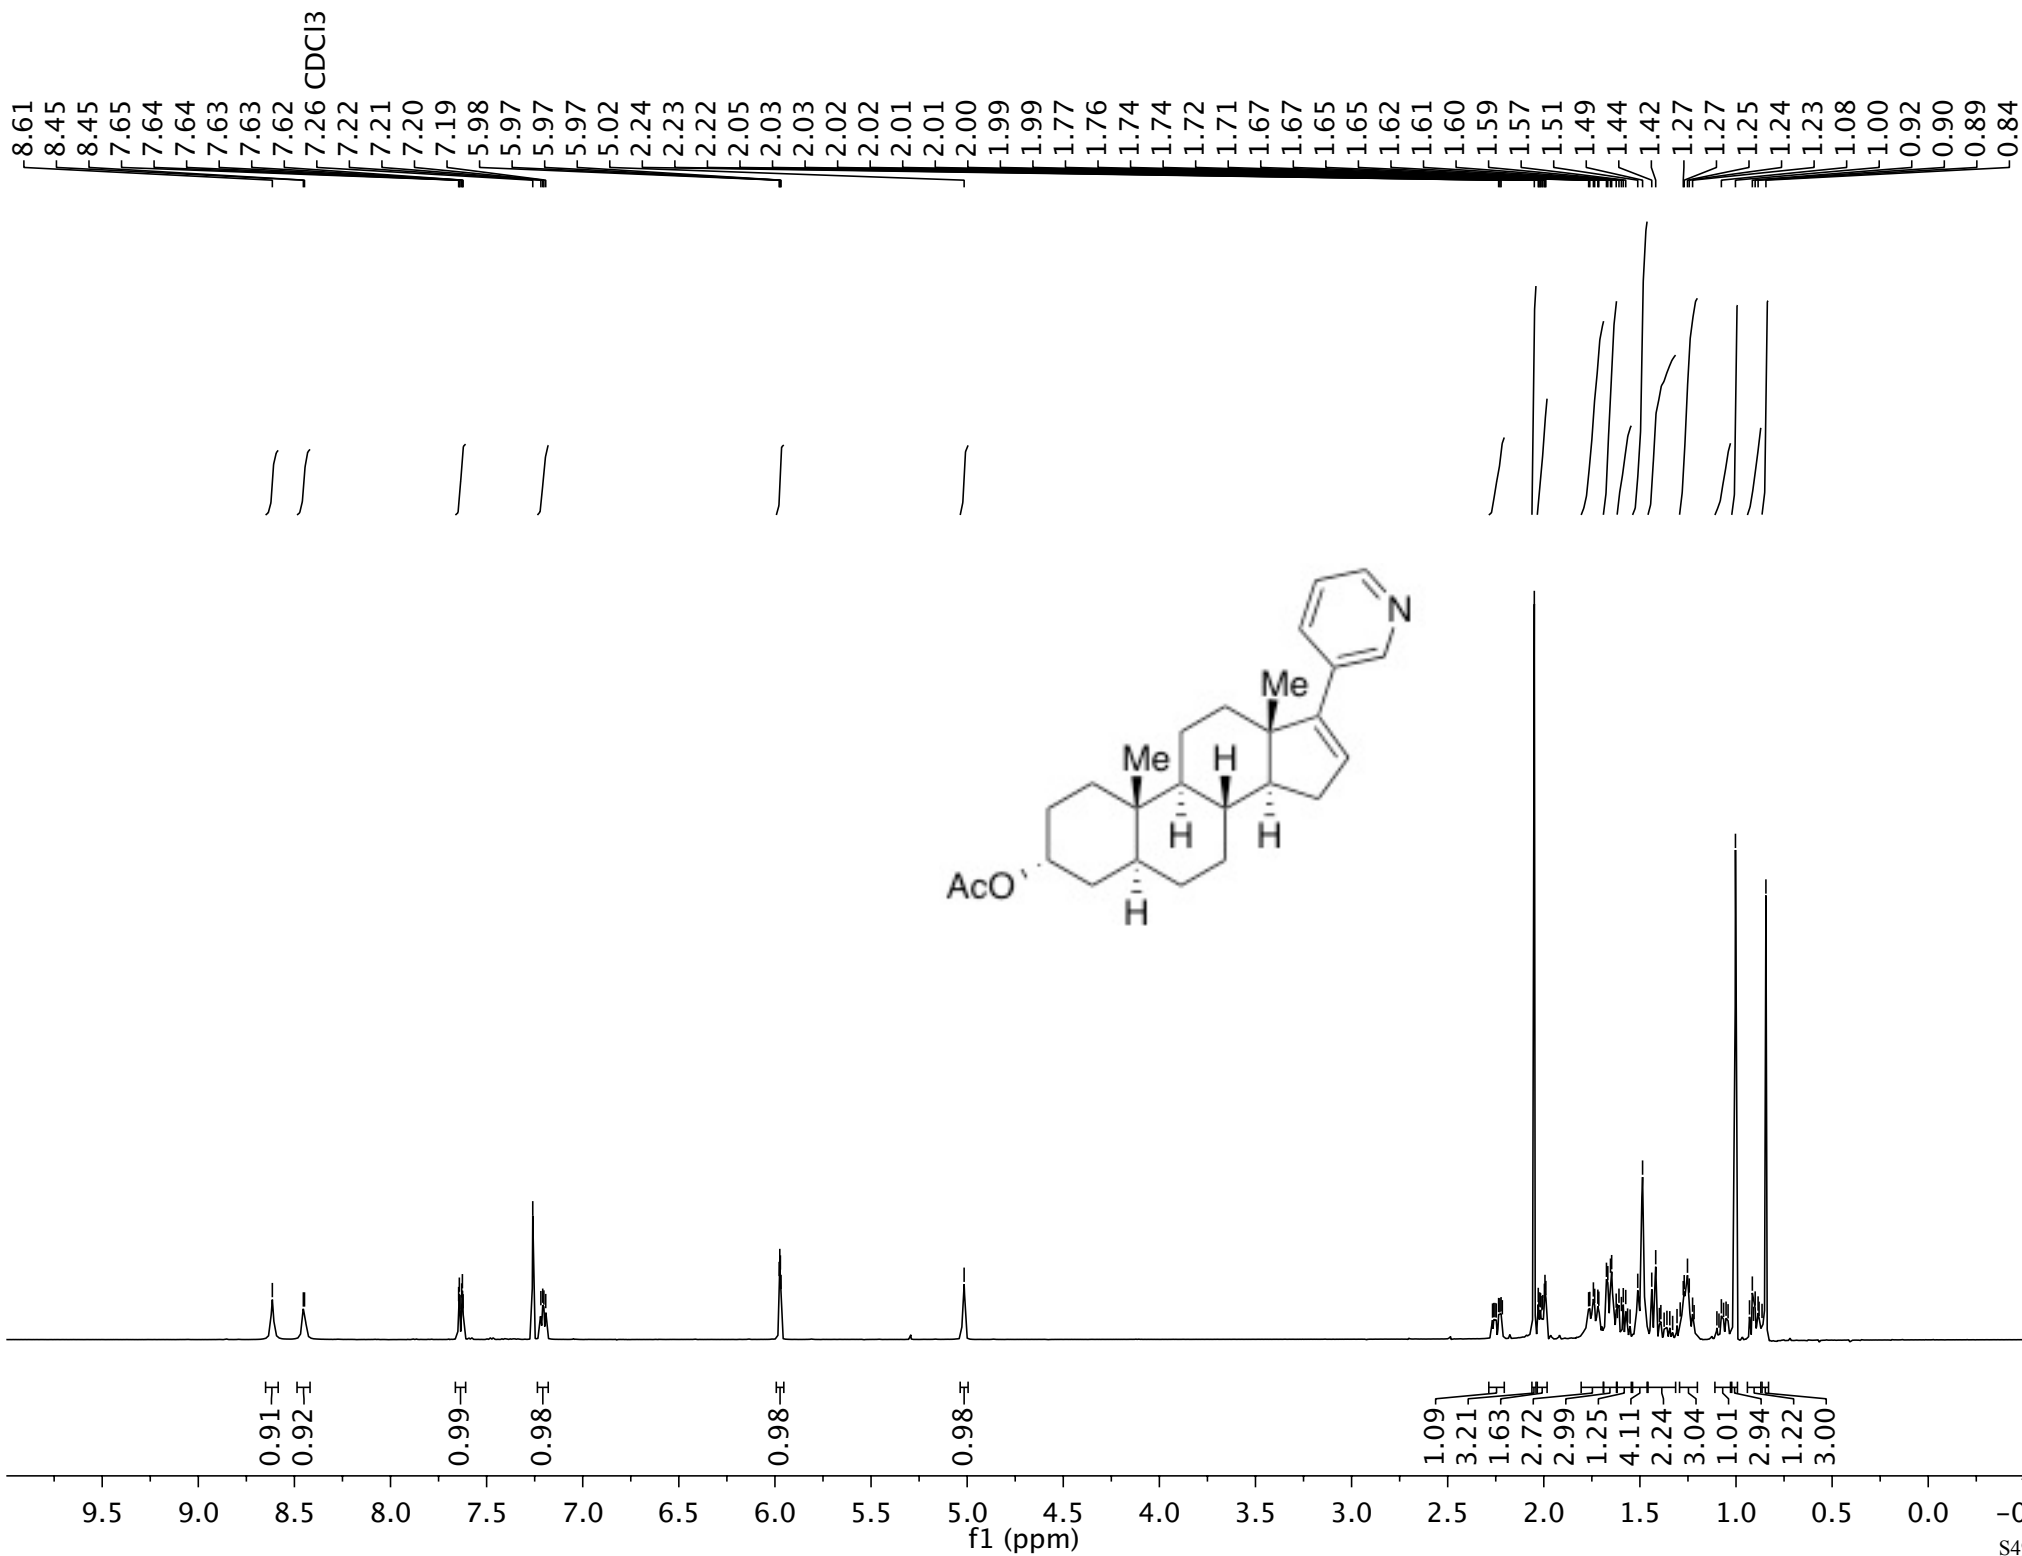

| Parameter              | Value          |
|------------------------|----------------|
| Origin                 | Varian         |
| Spectrometer           | inova          |
| Solvent                | CDCl3          |
| Temperature            | 20.0           |
| Pulse Sequence         | s2pul          |
| Experiment             | 1D             |
| Probe                  | hcn            |
| Receiver Gain          | 32             |
| Relaxation Delay       | 15.0000        |
| Pulse Width            | 0.0000         |
| Acquisition Time       | 4.0960         |
| Spectrometer Frequency | 500.07         |
| Spectral Width         | 8000.0         |
| Lowest Frequency       | -1510.9        |
| Nucleus                | <sup>1</sup> H |
| Acquired Size          | 32768          |
| Spectral Size          | 65536          |

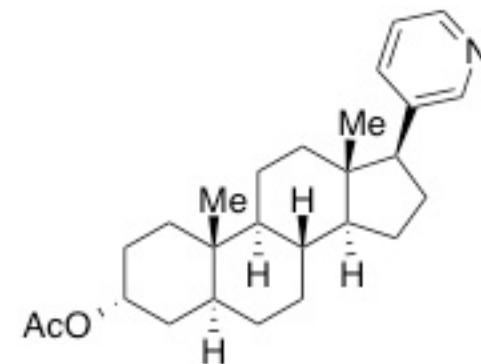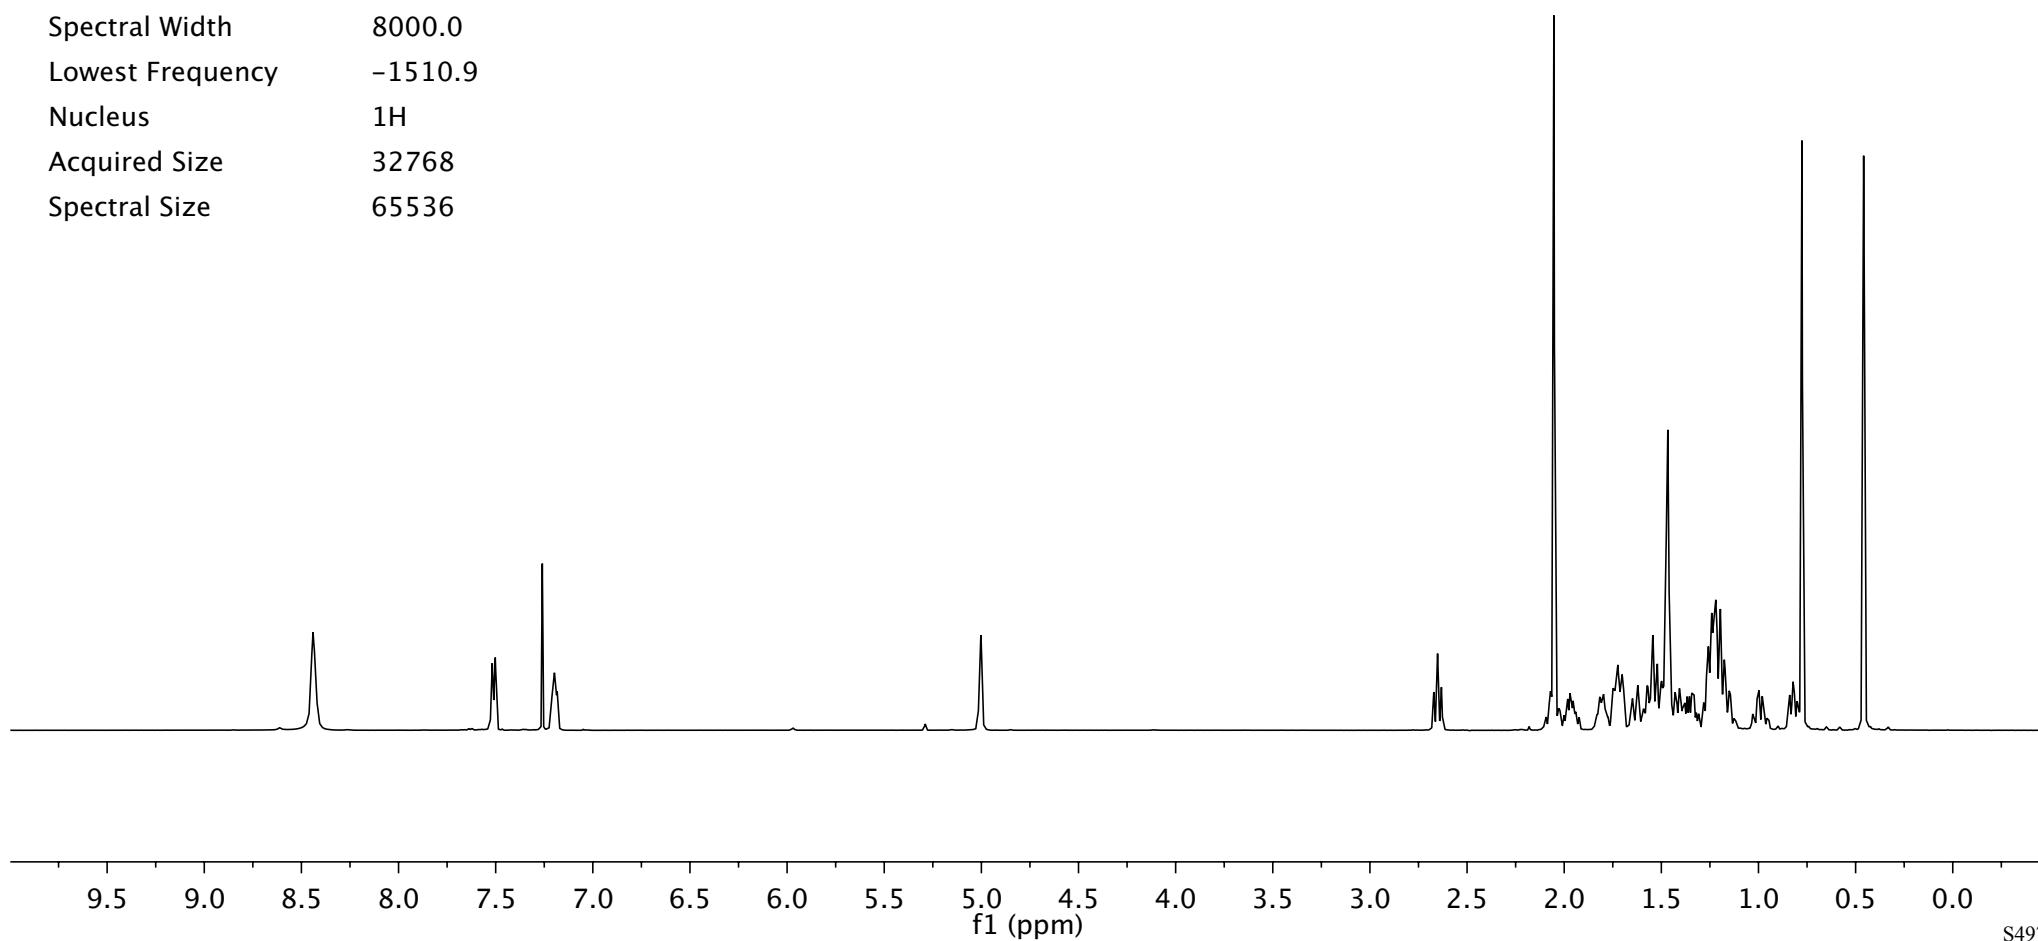

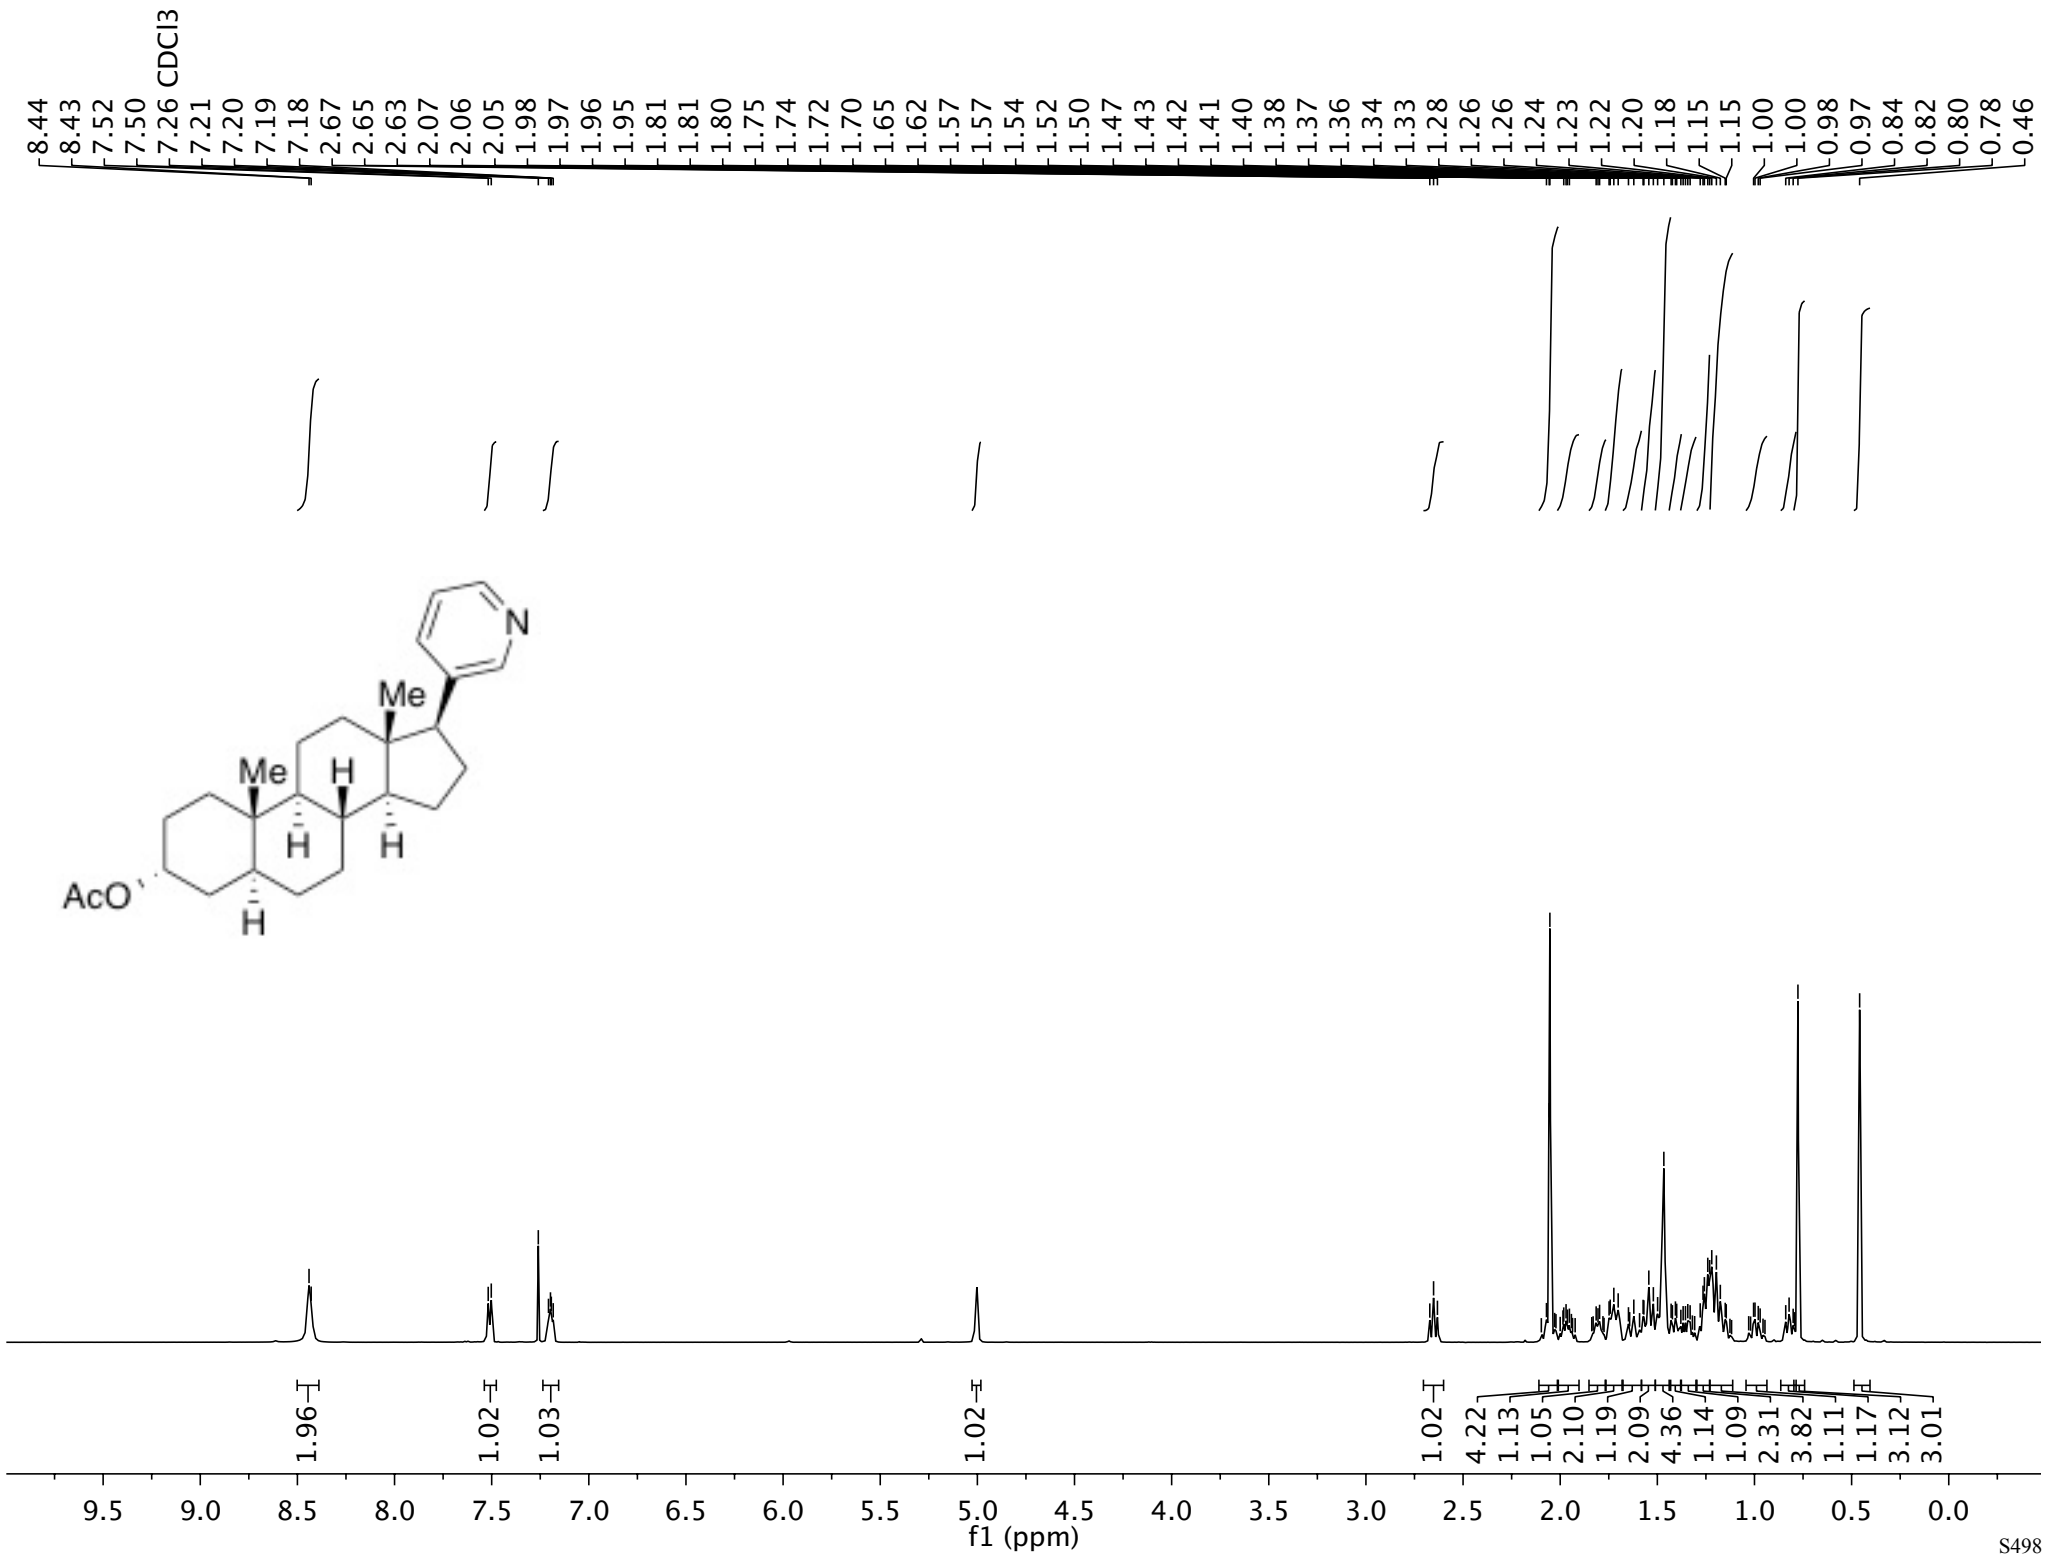

| Parameter              | Value   |
|------------------------|---------|
| Origin                 | Varian  |
| Spectrometer           | inova   |
| Solvent                | CDCl3   |
| Temperature            | 20.0    |
| Pulse Sequence         | s2pul   |
| Experiment             | 1D      |
| Probe                  | QUADG   |
| Receiver Gain          | 60      |
| Relaxation Delay       | 1.0000  |
| Pulse Width            | 0.0000  |
| Acquisition Time       | 1.0240  |
| Spectrometer Frequency | 125.60  |
| Spectral Width         | 32000.0 |
| Lowest Frequency       | -2201.7 |
| Nucleus                | 13C     |
| Acquired Size          | 32768   |
| Spectral Size          | 65536   |

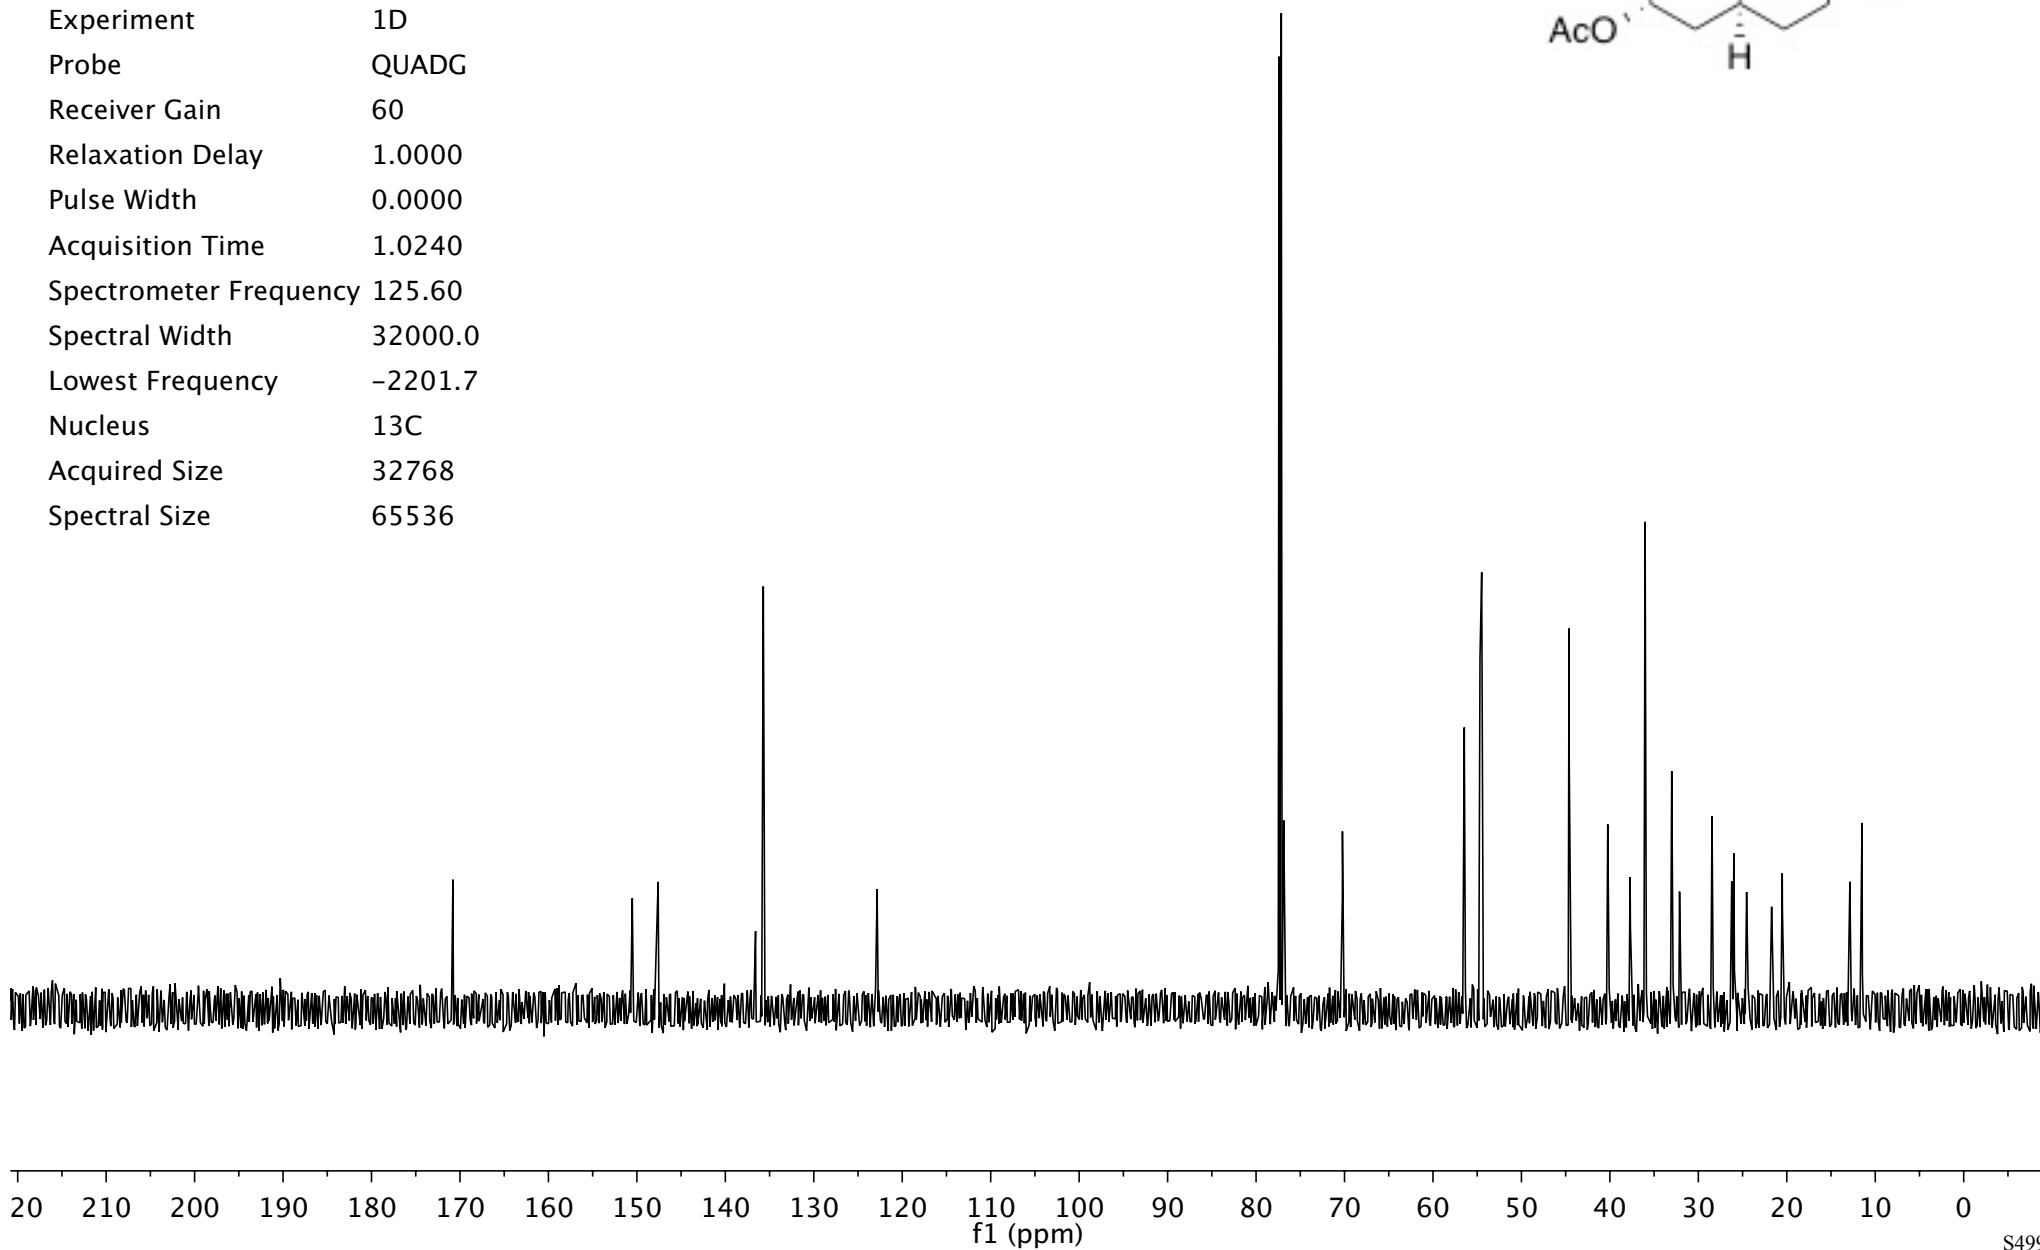

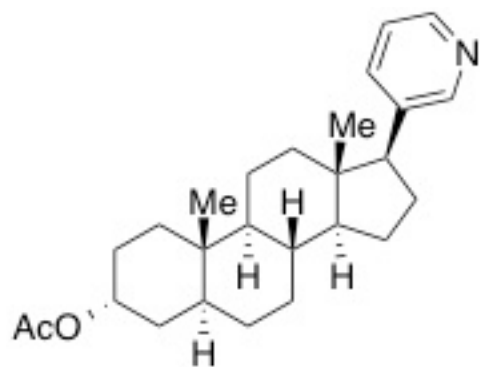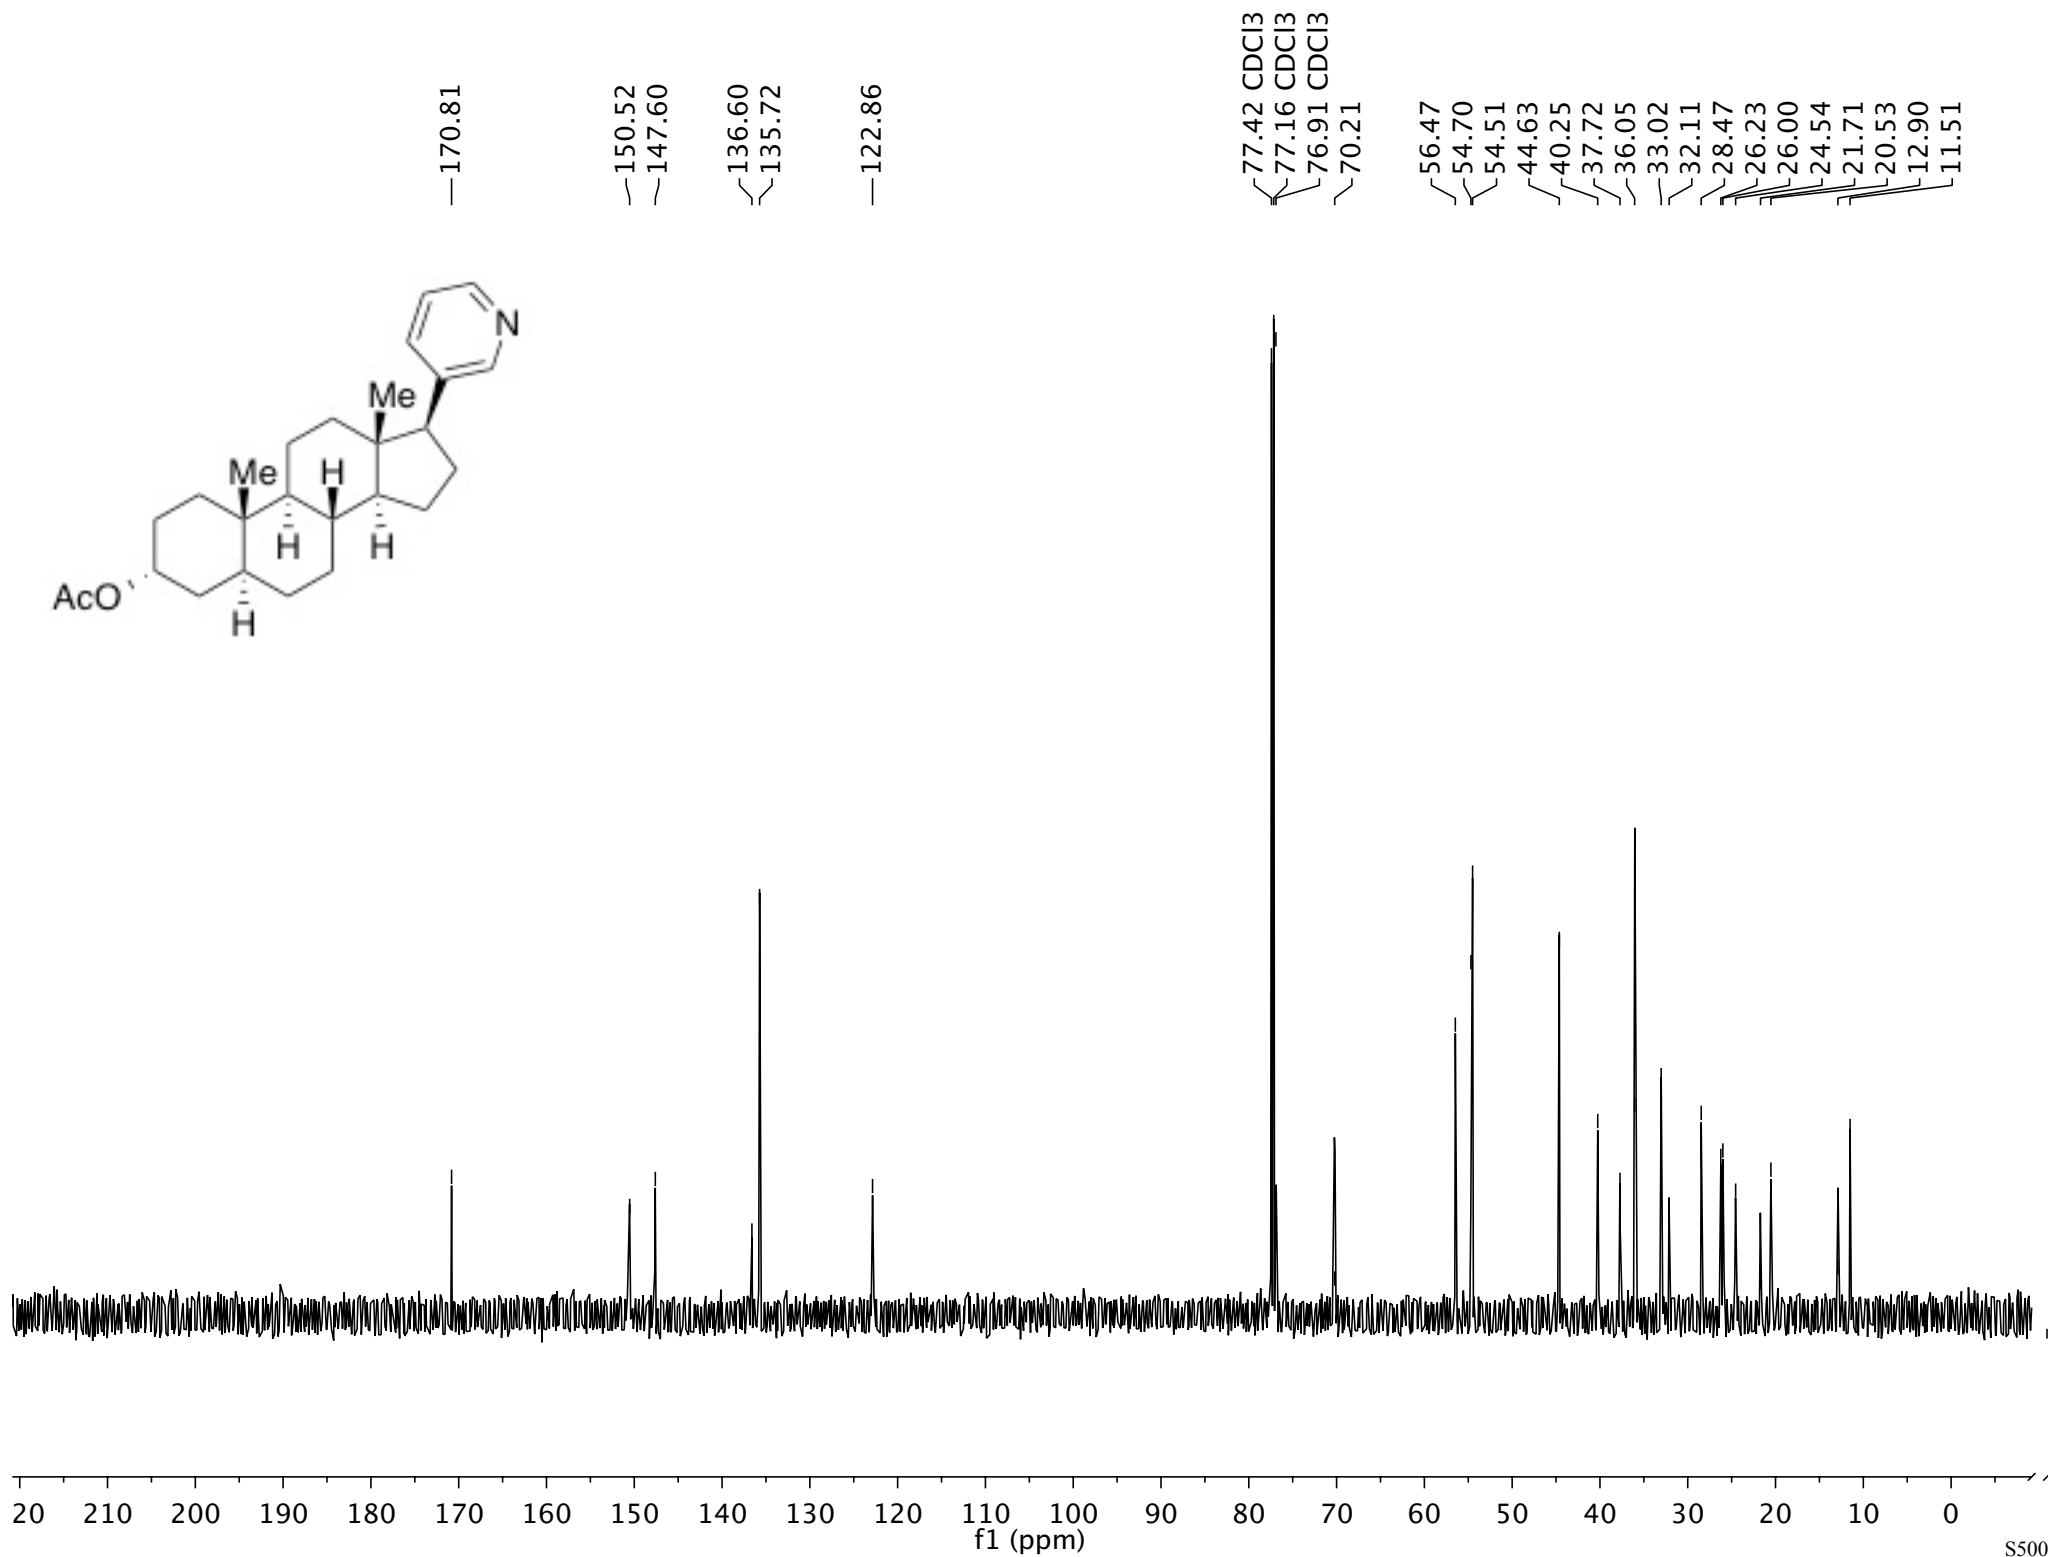

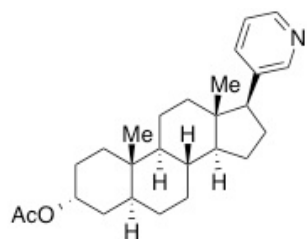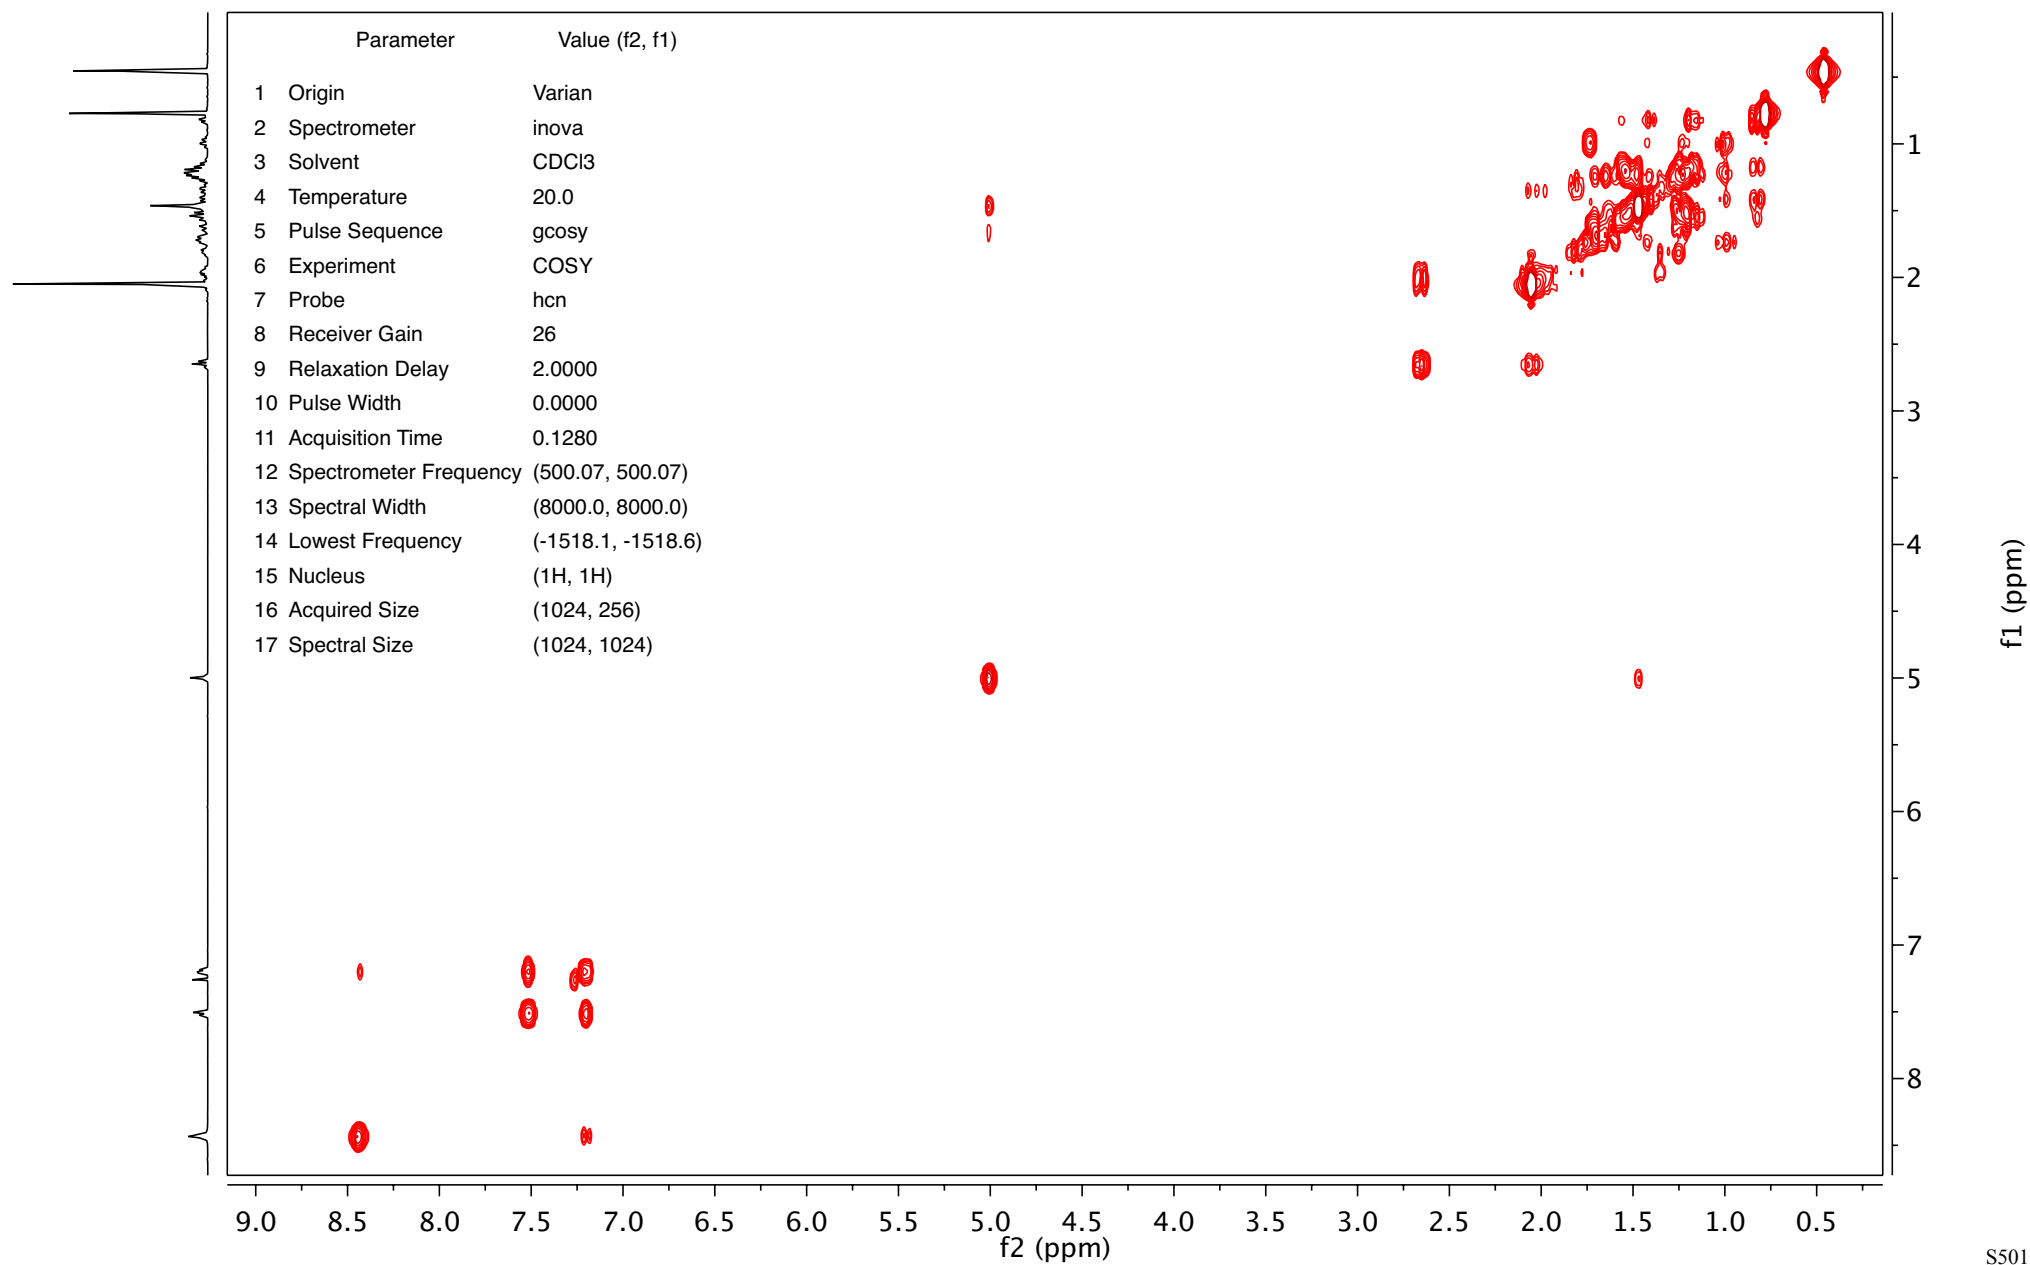

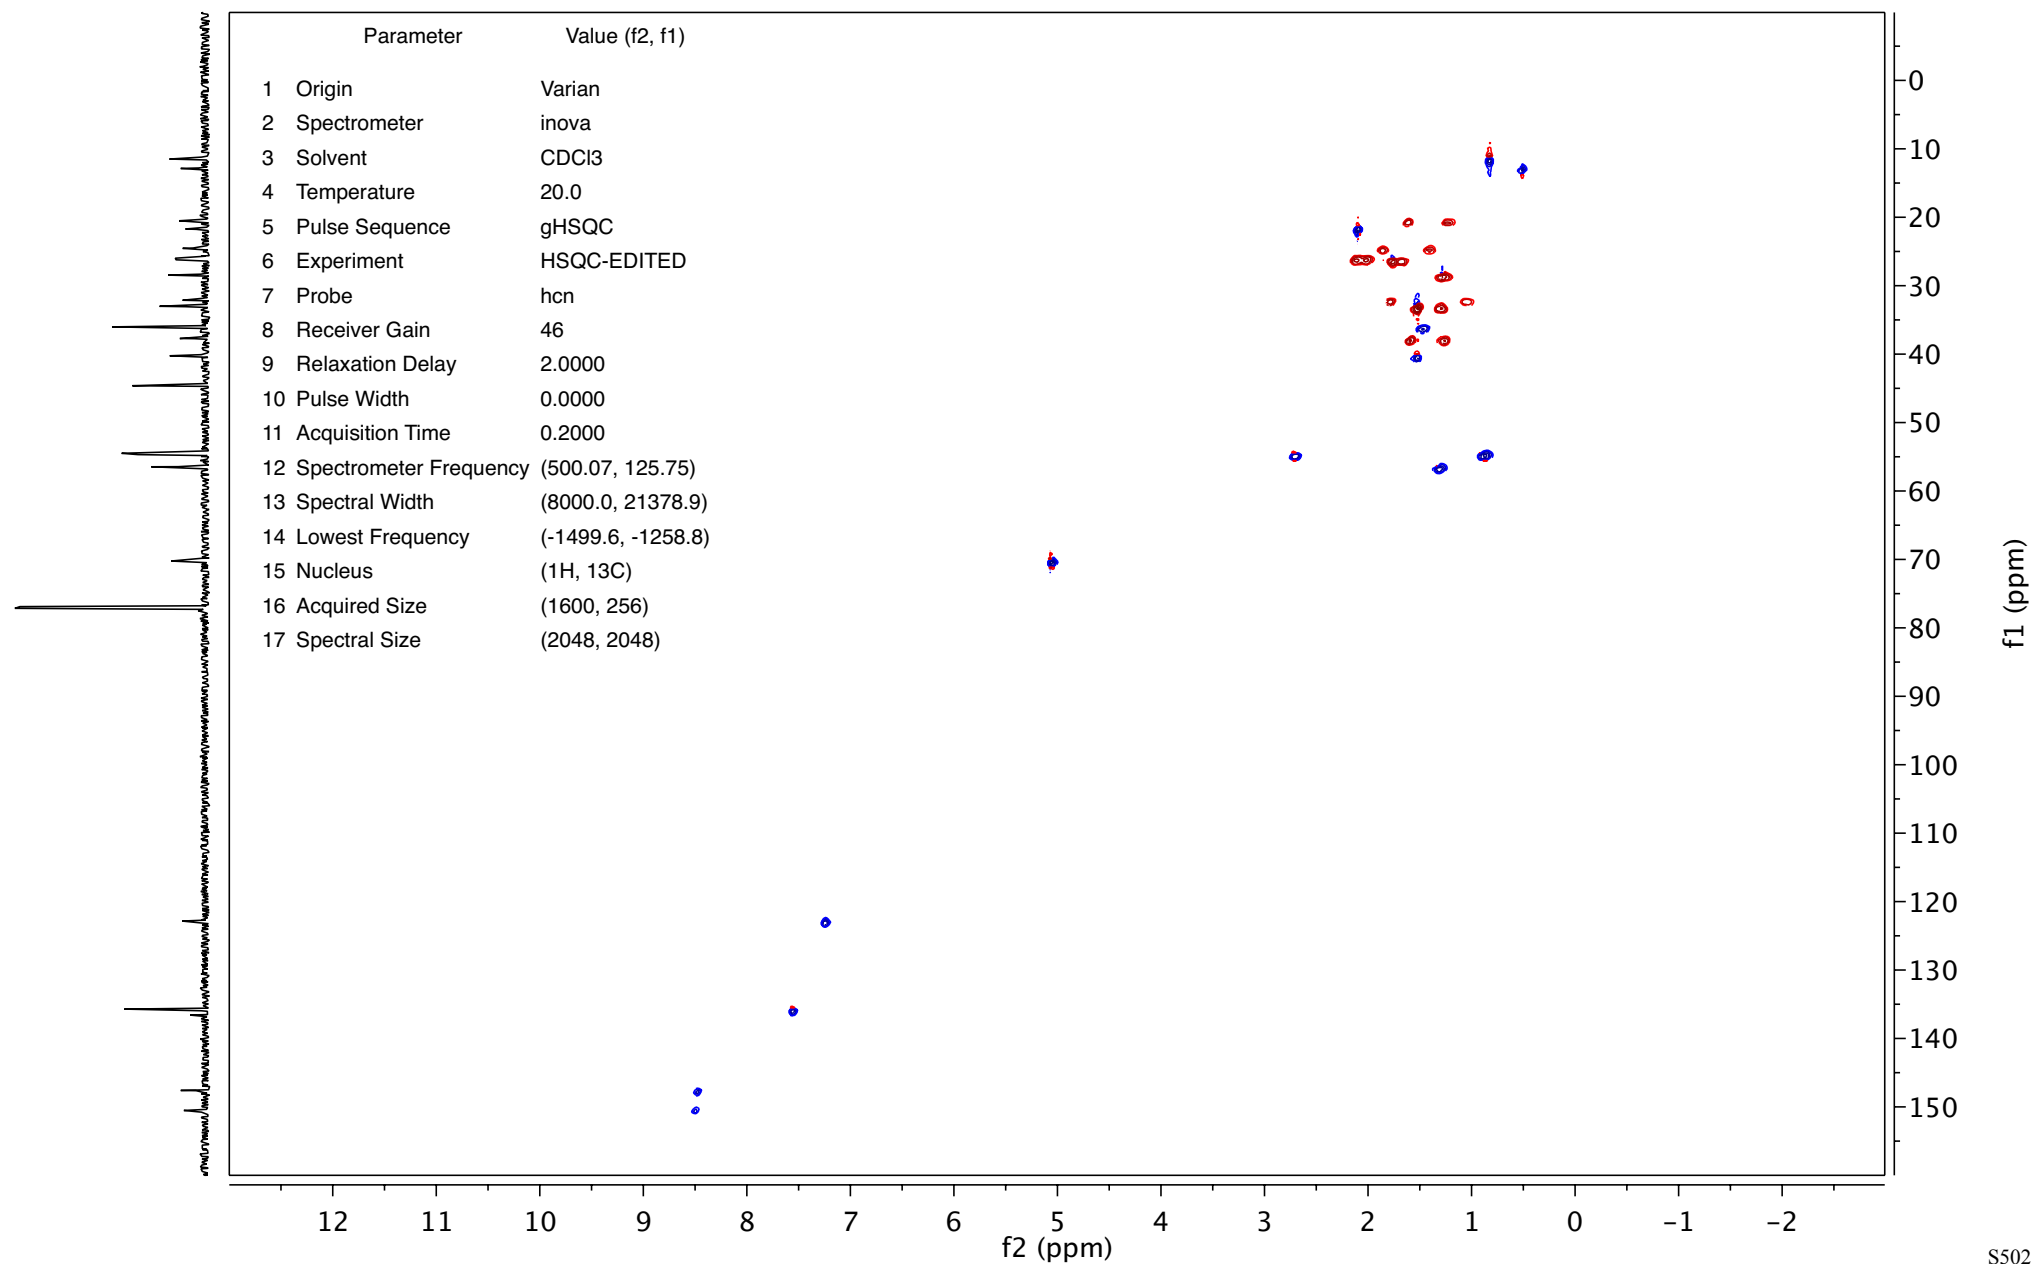

| Parameter              | Value             |
|------------------------|-------------------|
| Origin                 | Varian            |
| Spectrometer           | inova             |
| Solvent                | CDCl <sub>3</sub> |
| Temperature            | 20.0              |
| Pulse Sequence         | s2pul             |
| Experiment             | 1D                |
| Probe                  | hcn               |
| Receiver Gain          | 32                |
| Relaxation Delay       | 0.0000            |
| Pulse Width            | 0.0000            |
| Acquisition Time       | 4.0960            |
| Spectrometer Frequency | 500.07            |
| Spectral Width         | 8000.0            |
| Lowest Frequency       | -1499.6           |
| Nucleus                | <sup>1</sup> H    |
| Acquired Size          | 32768             |
| Spectral Size          | 65536             |

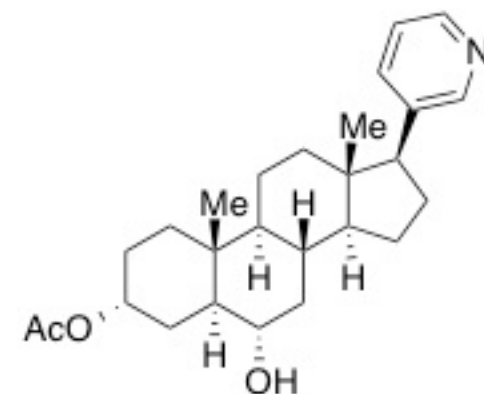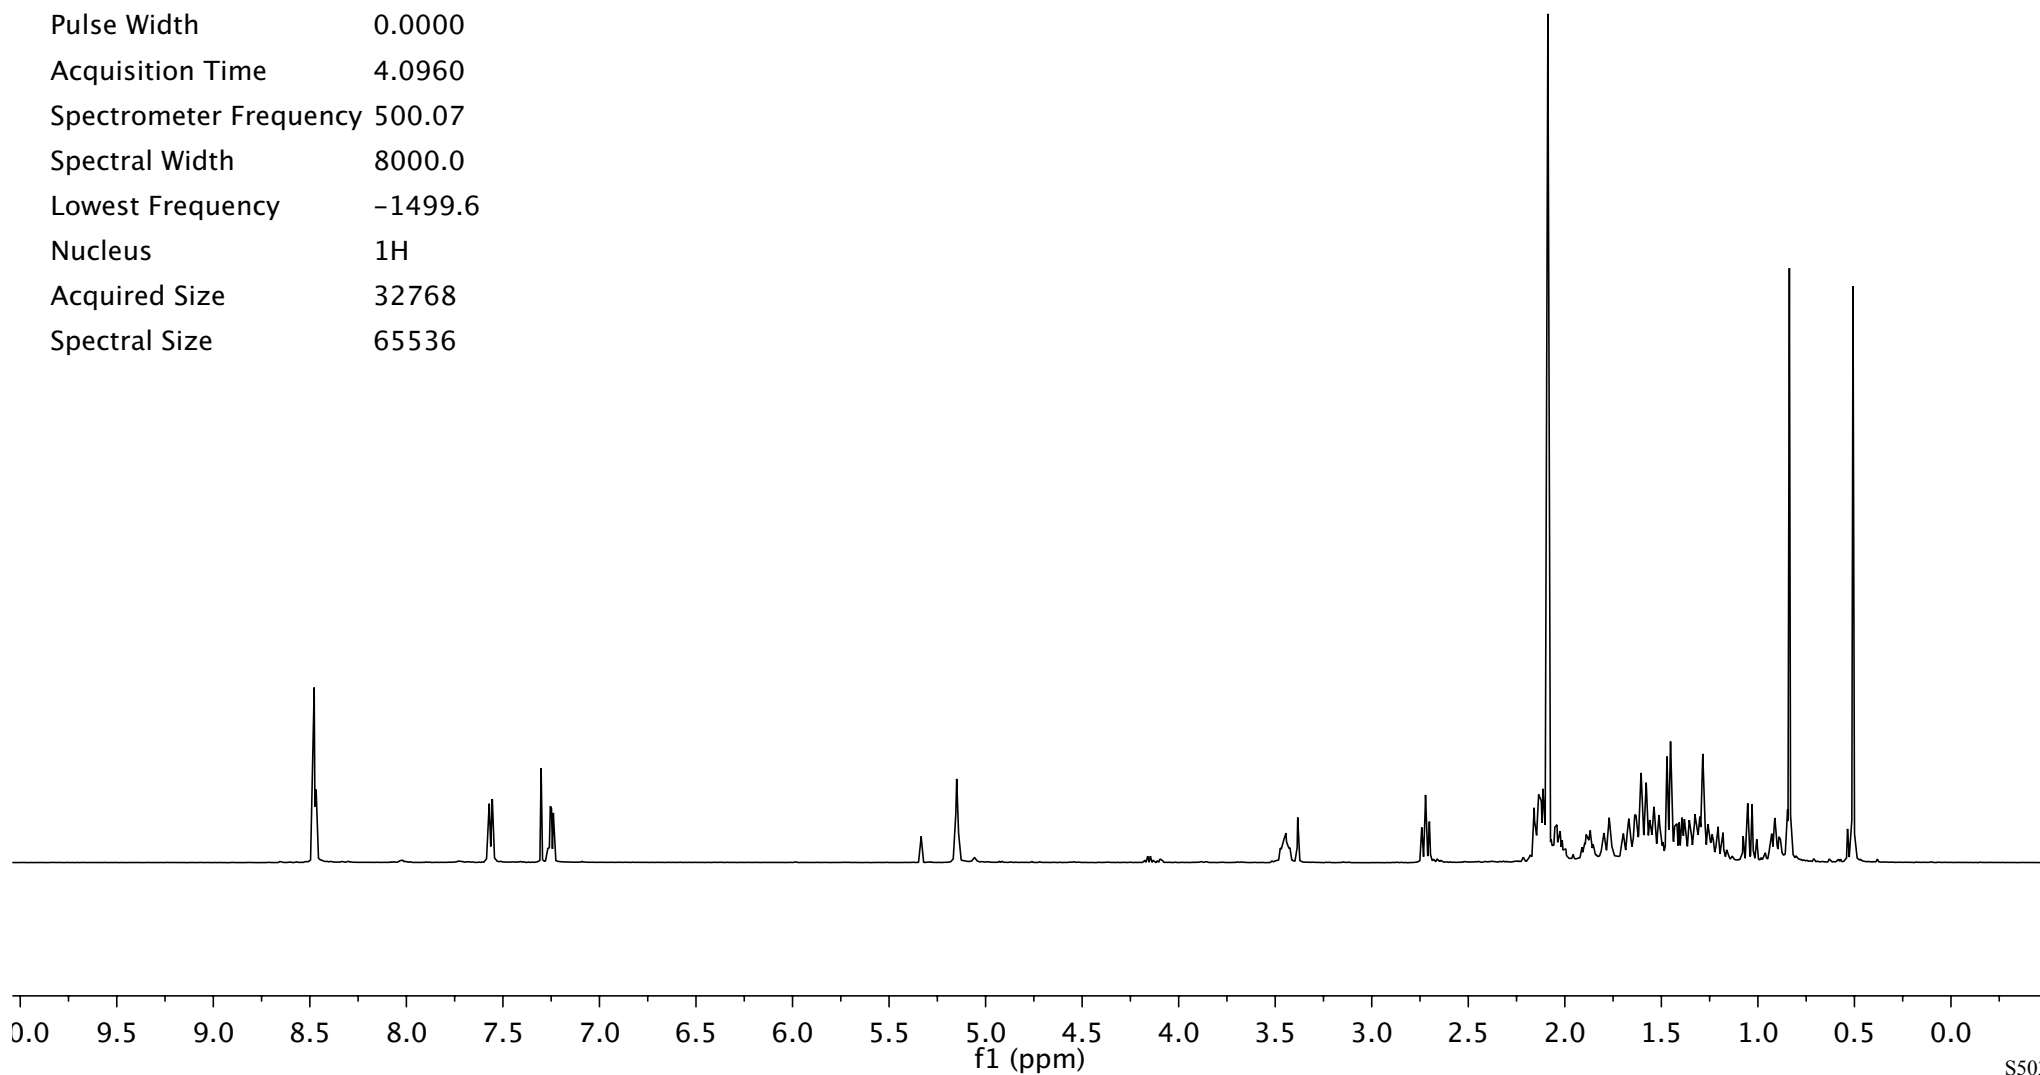



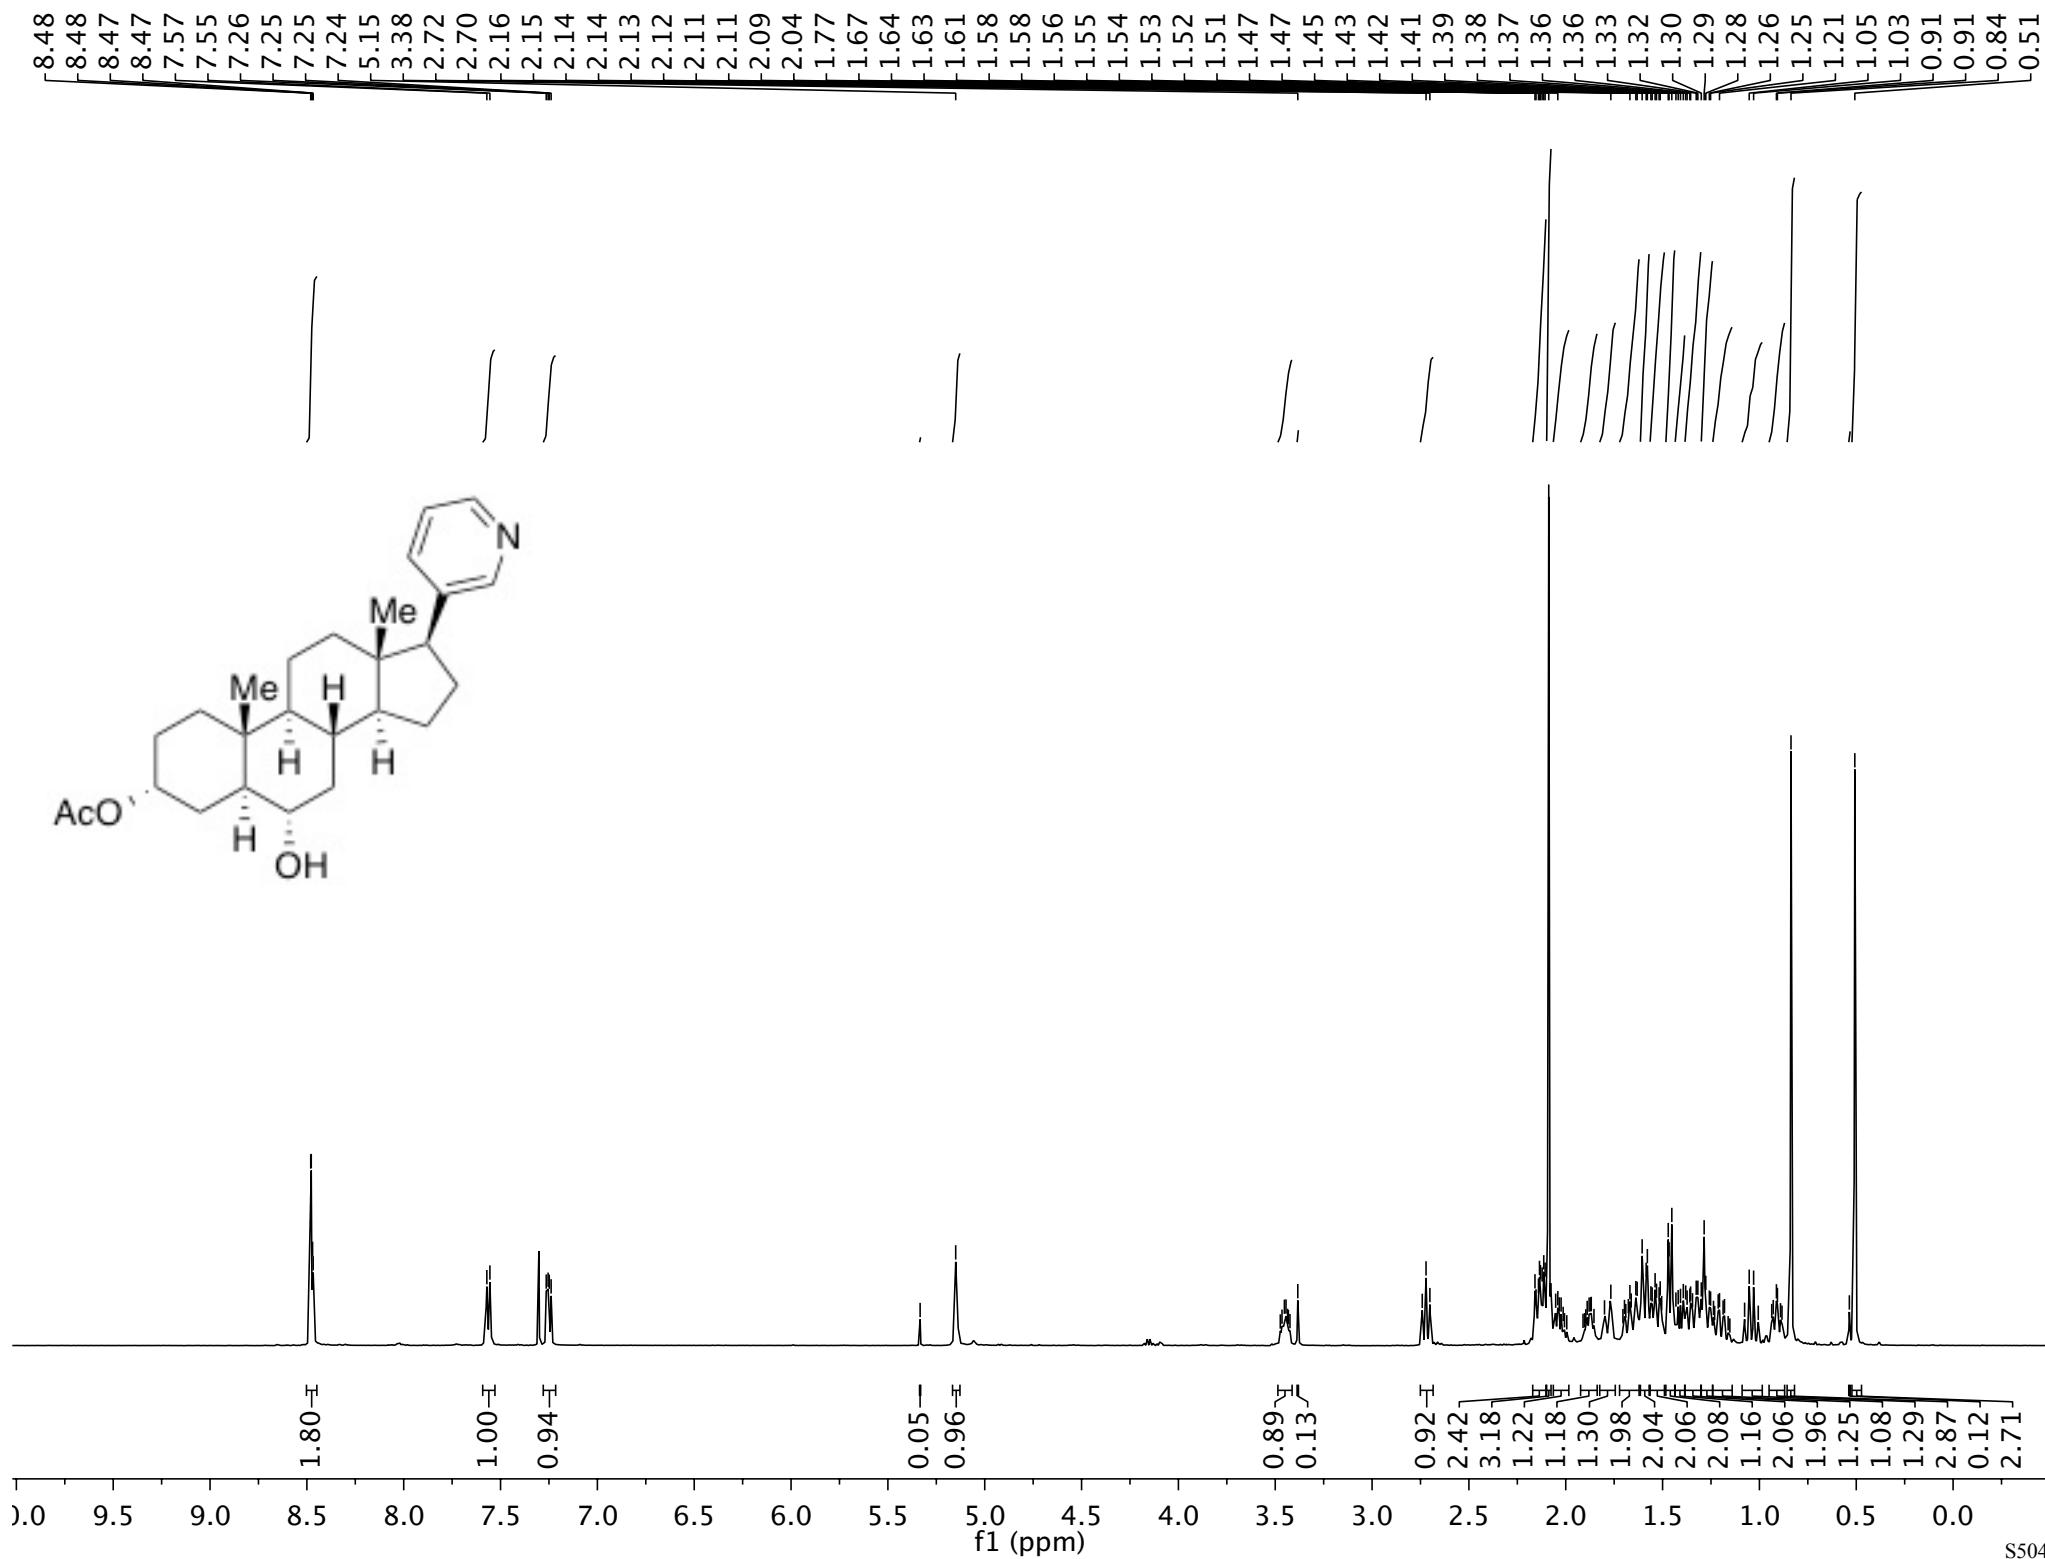

| Parameter              | Value           |
|------------------------|-----------------|
| Origin                 | Varian          |
| Spectrometer           | inova           |
| Solvent                | CDCl3           |
| Temperature            | 20.0            |
| Pulse Sequence         | s2pul           |
| Experiment             | 1D              |
| Probe                  | QUAD            |
| Receiver Gain          | 60              |
| Relaxation Delay       | 1.0000          |
| Pulse Width            | 0.0000          |
| Acquisition Time       | 1.0863          |
| Spectrometer Frequency | 125.66          |
| Spectral Width         | 30165.9         |
| Lowest Frequency       | -1274.8         |
| Nucleus                | <sup>13</sup> C |
| Acquired Size          | 32768           |
| Spectral Size          | 65536           |

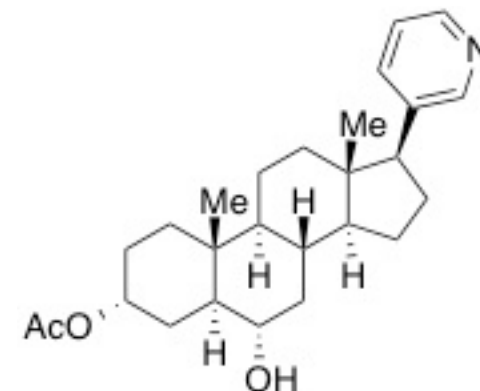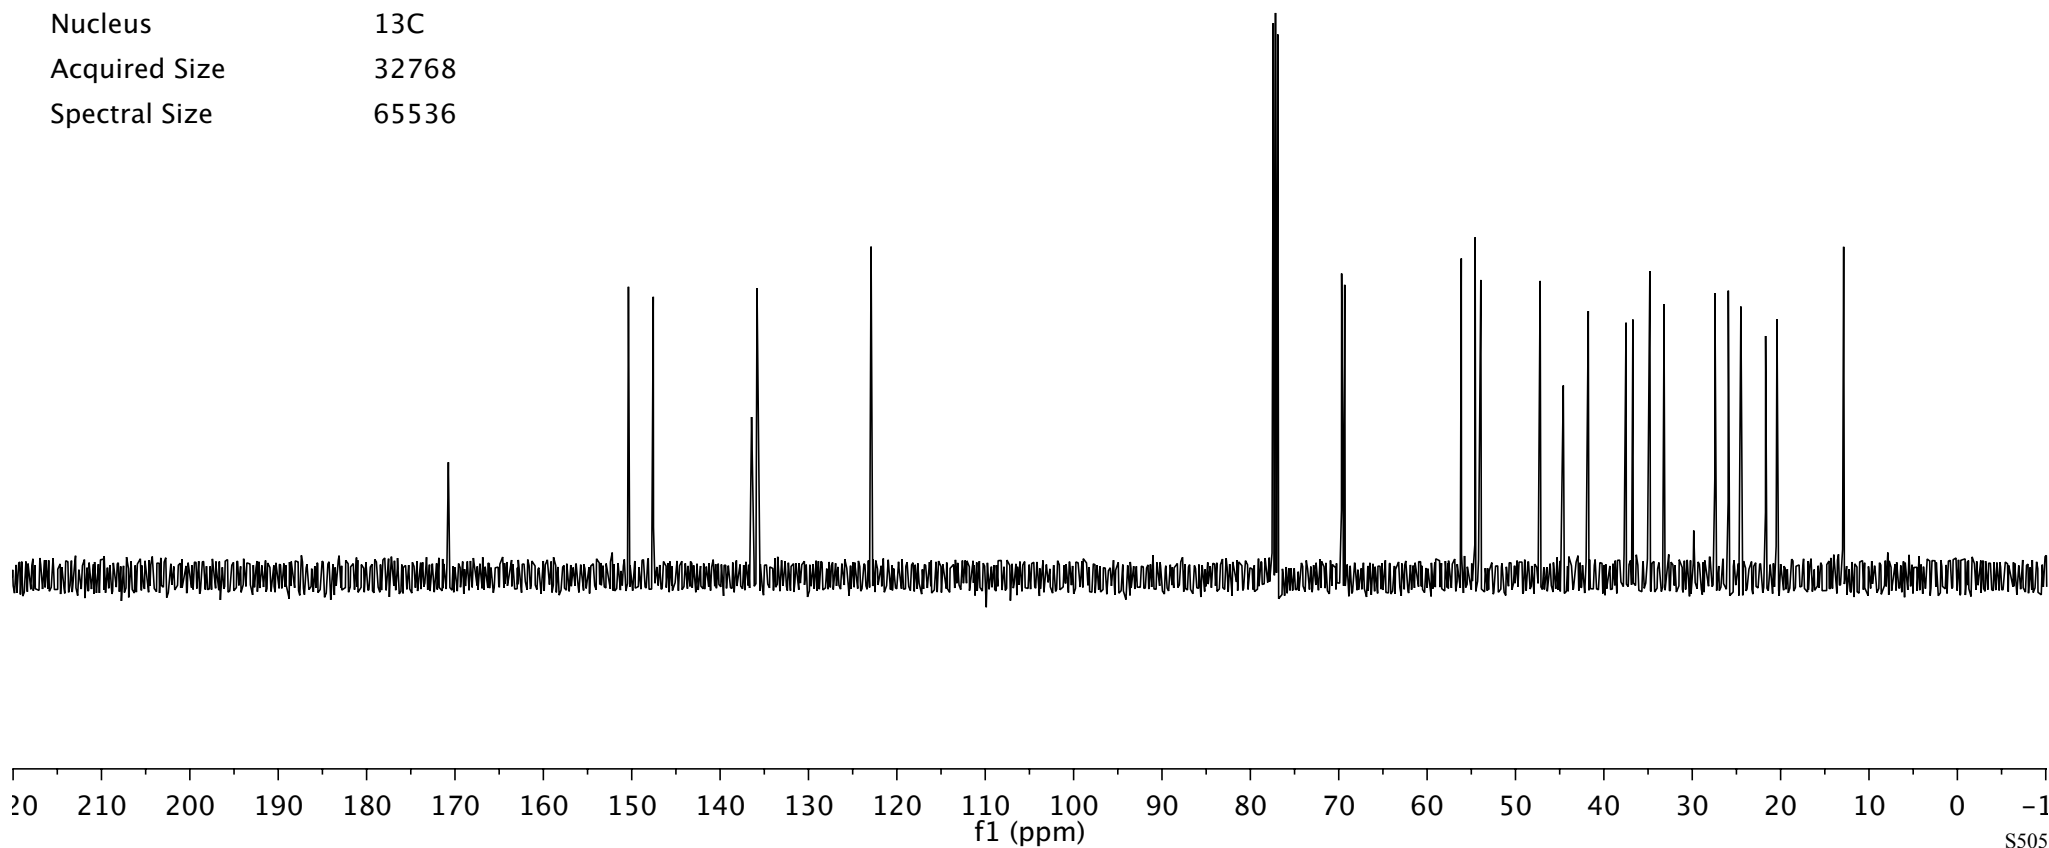

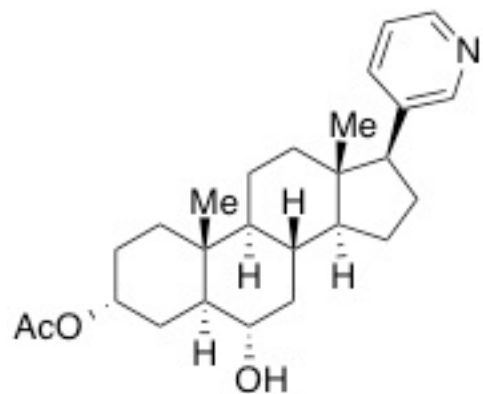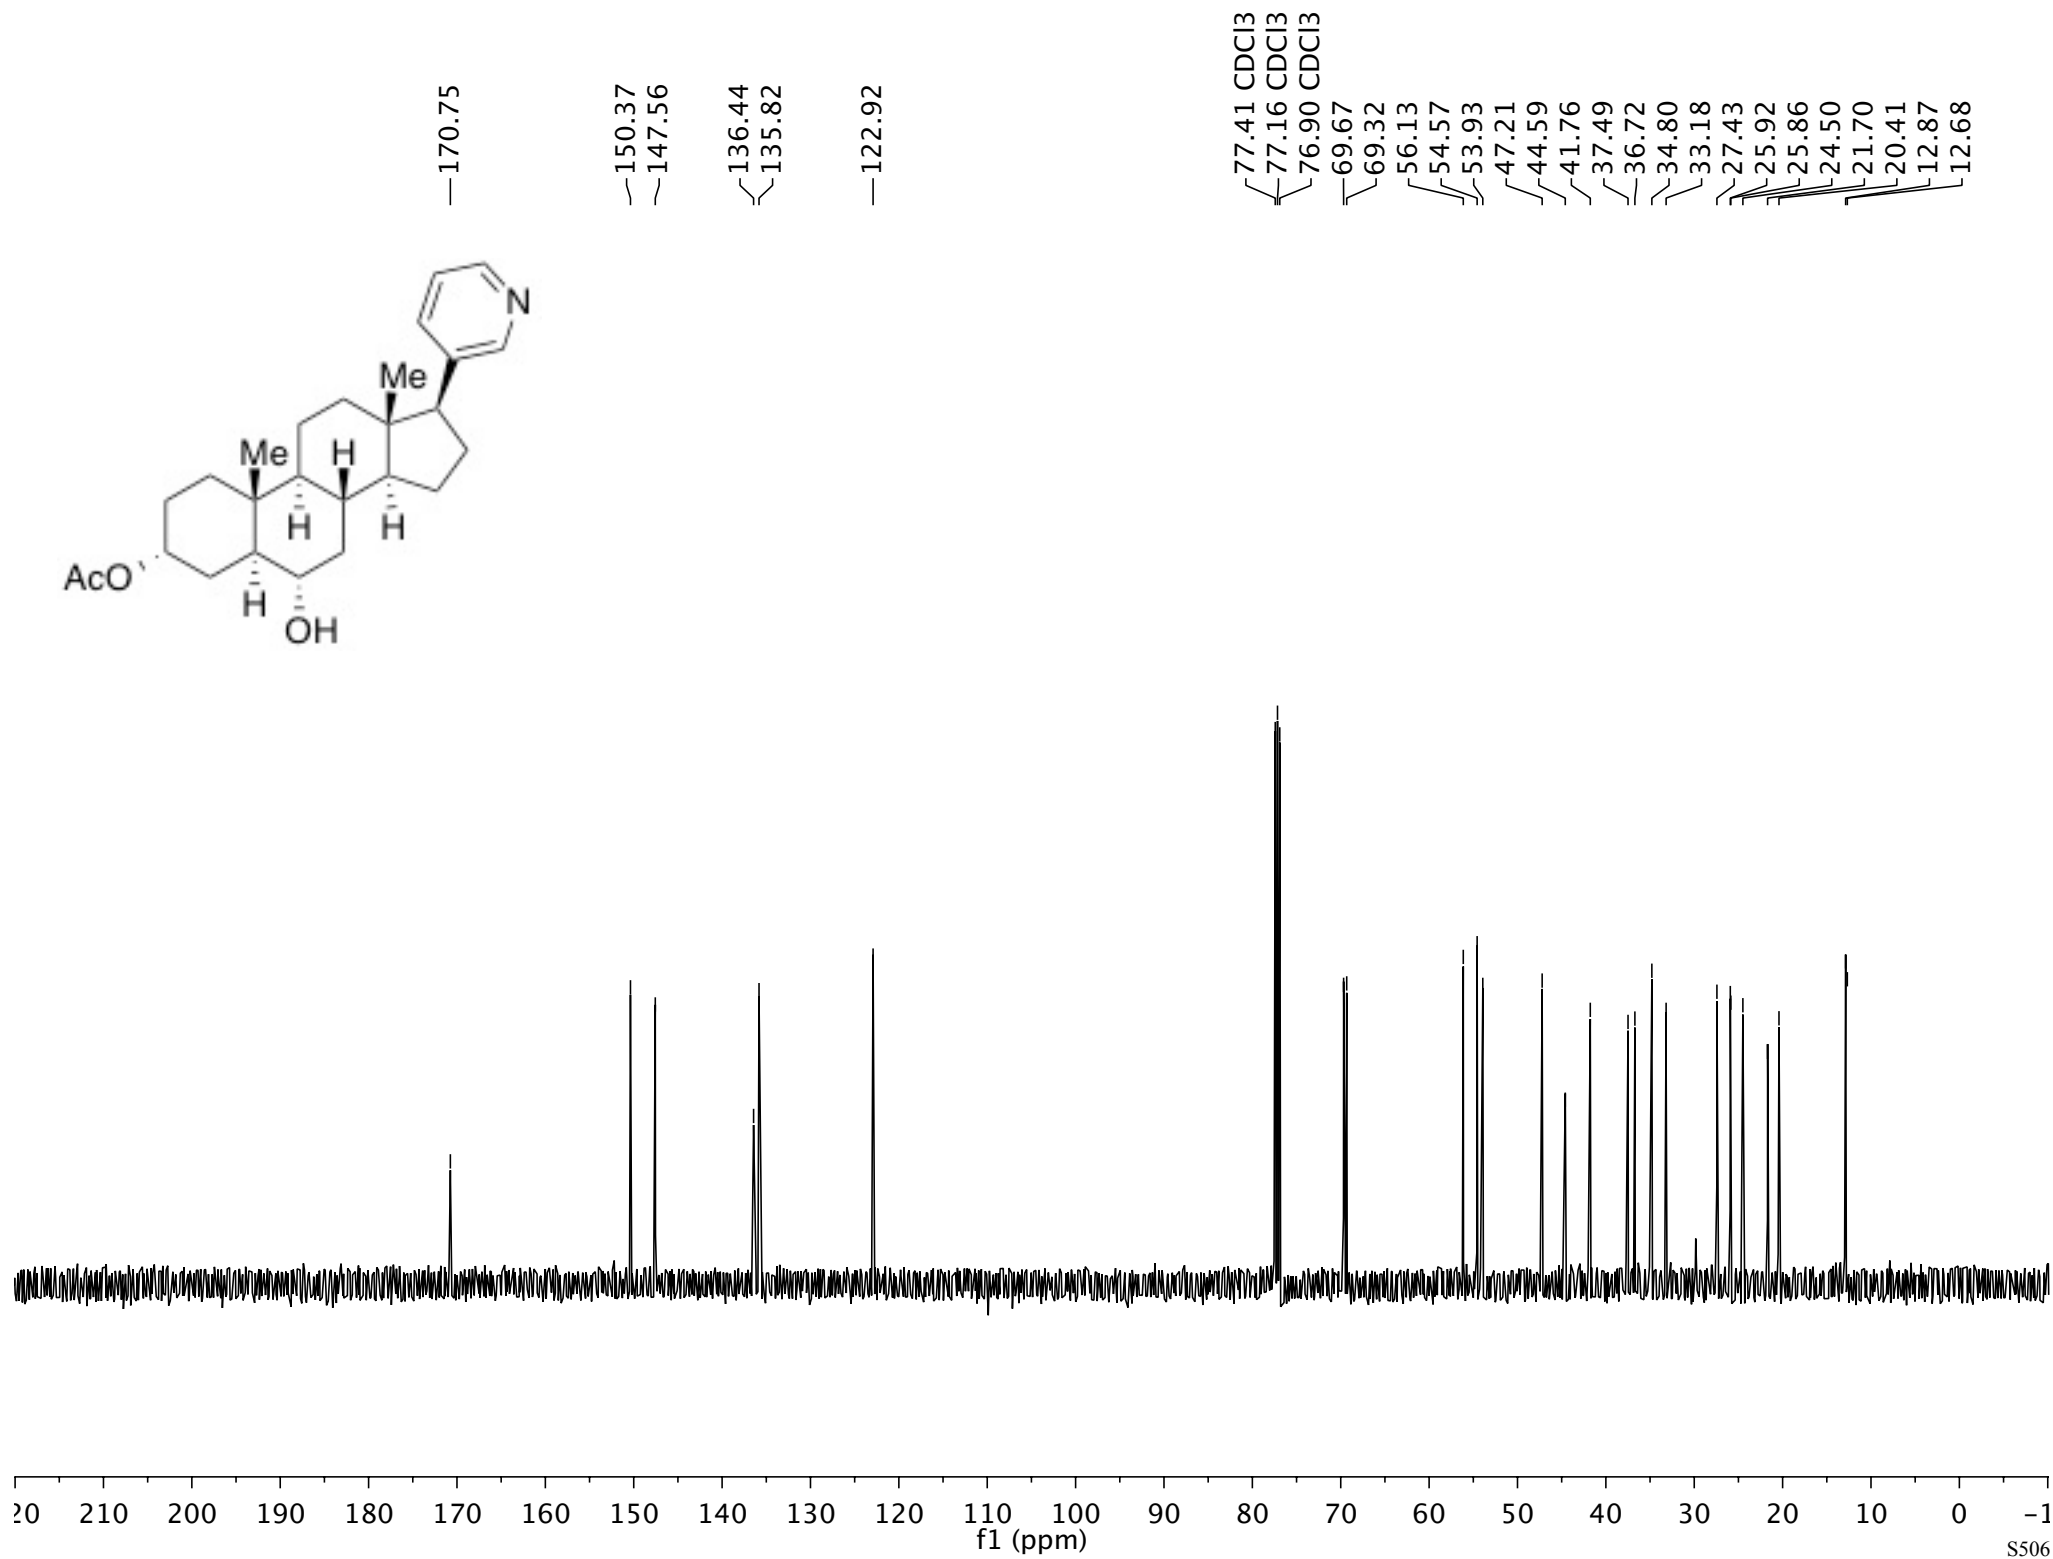

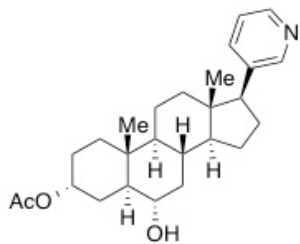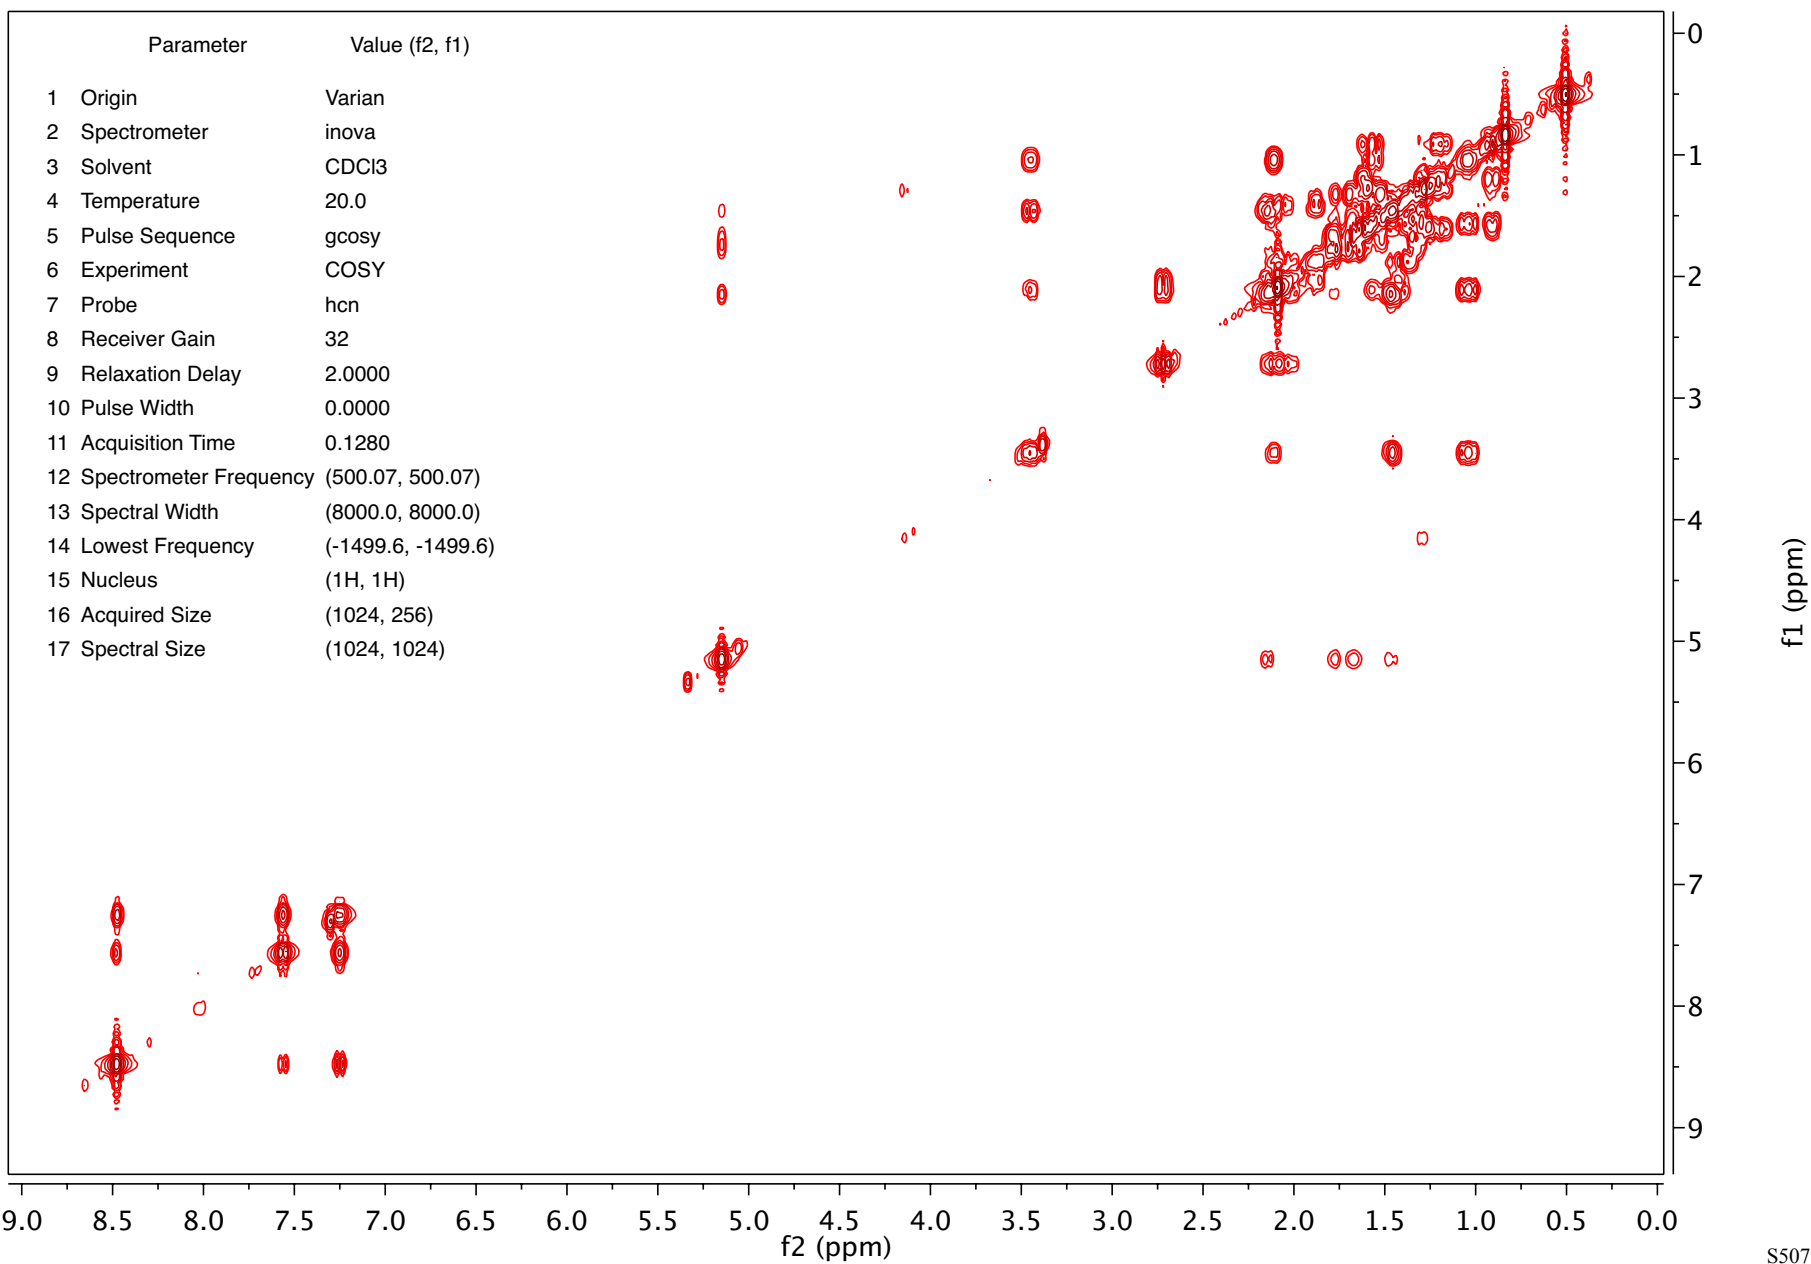

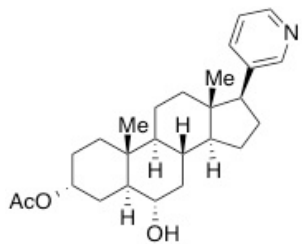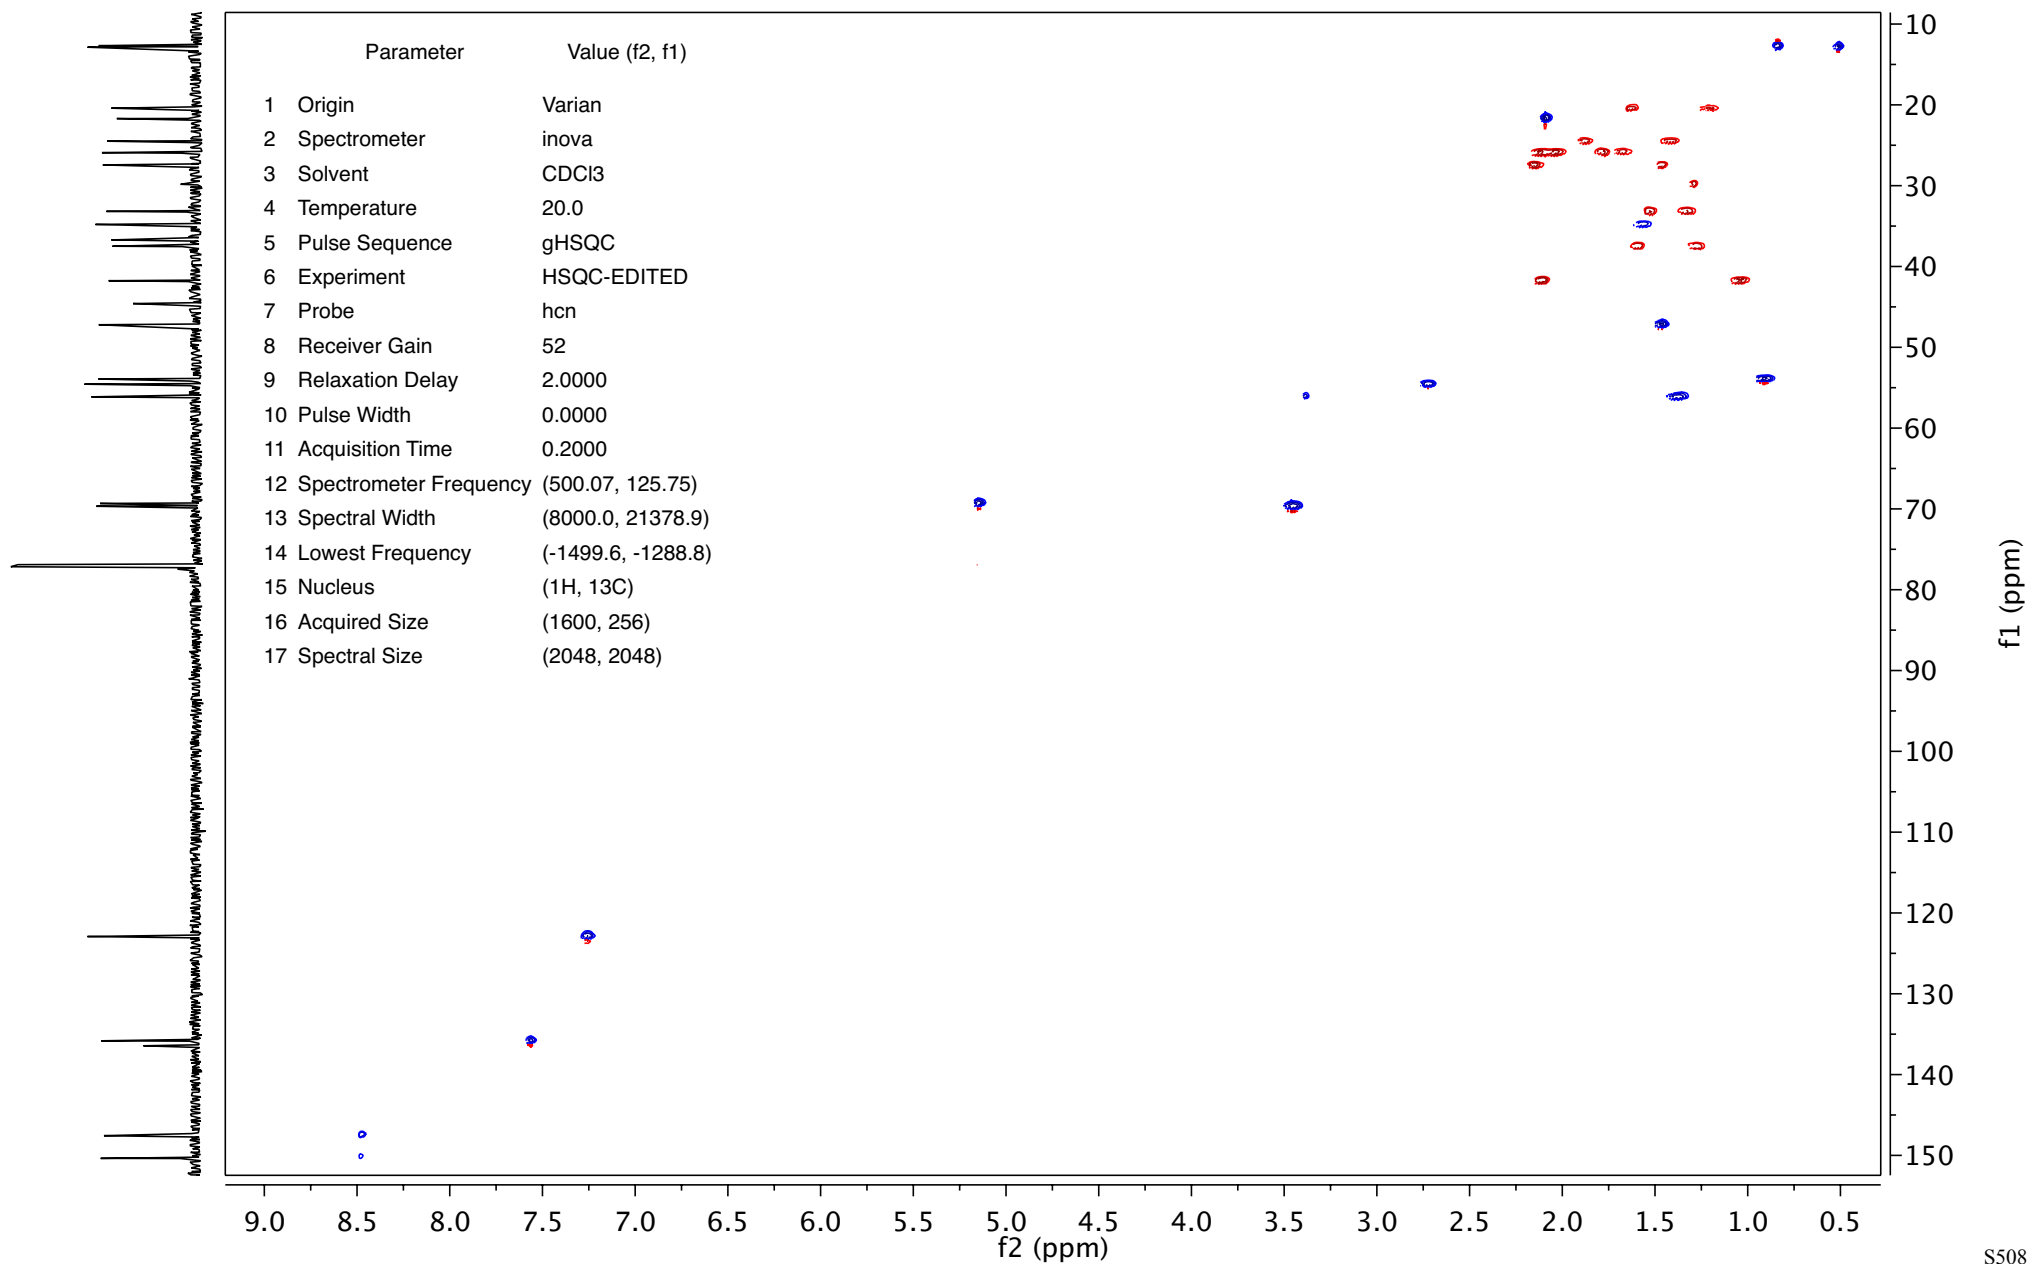

| Parameter              | Value          |
|------------------------|----------------|
| Origin                 | Varian         |
| Spectrometer           | inova          |
| Solvent                | CDCl3          |
| Temperature            | 20.0           |
| Pulse Sequence         | NOESY1D        |
| Experiment             | 1D-NOESY       |
| Probe                  | hcn            |
| Receiver Gain          | 44             |
| Relaxation Delay       | 2.0000         |
| Pulse Width            | 0.0000         |
| Acquisition Time       | 4.0960         |
| Spectrometer Frequency | 500.07         |
| Spectral Width         | 8000.0         |
| Lowest Frequency       | -1520.9        |
| Nucleus                | <sup>1</sup> H |
| Acquired Size          | 32768          |
| Spectral Size          | 65536          |

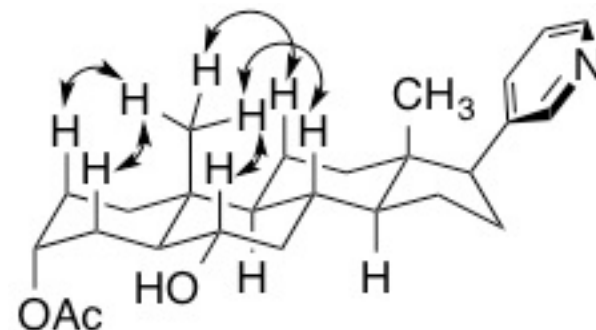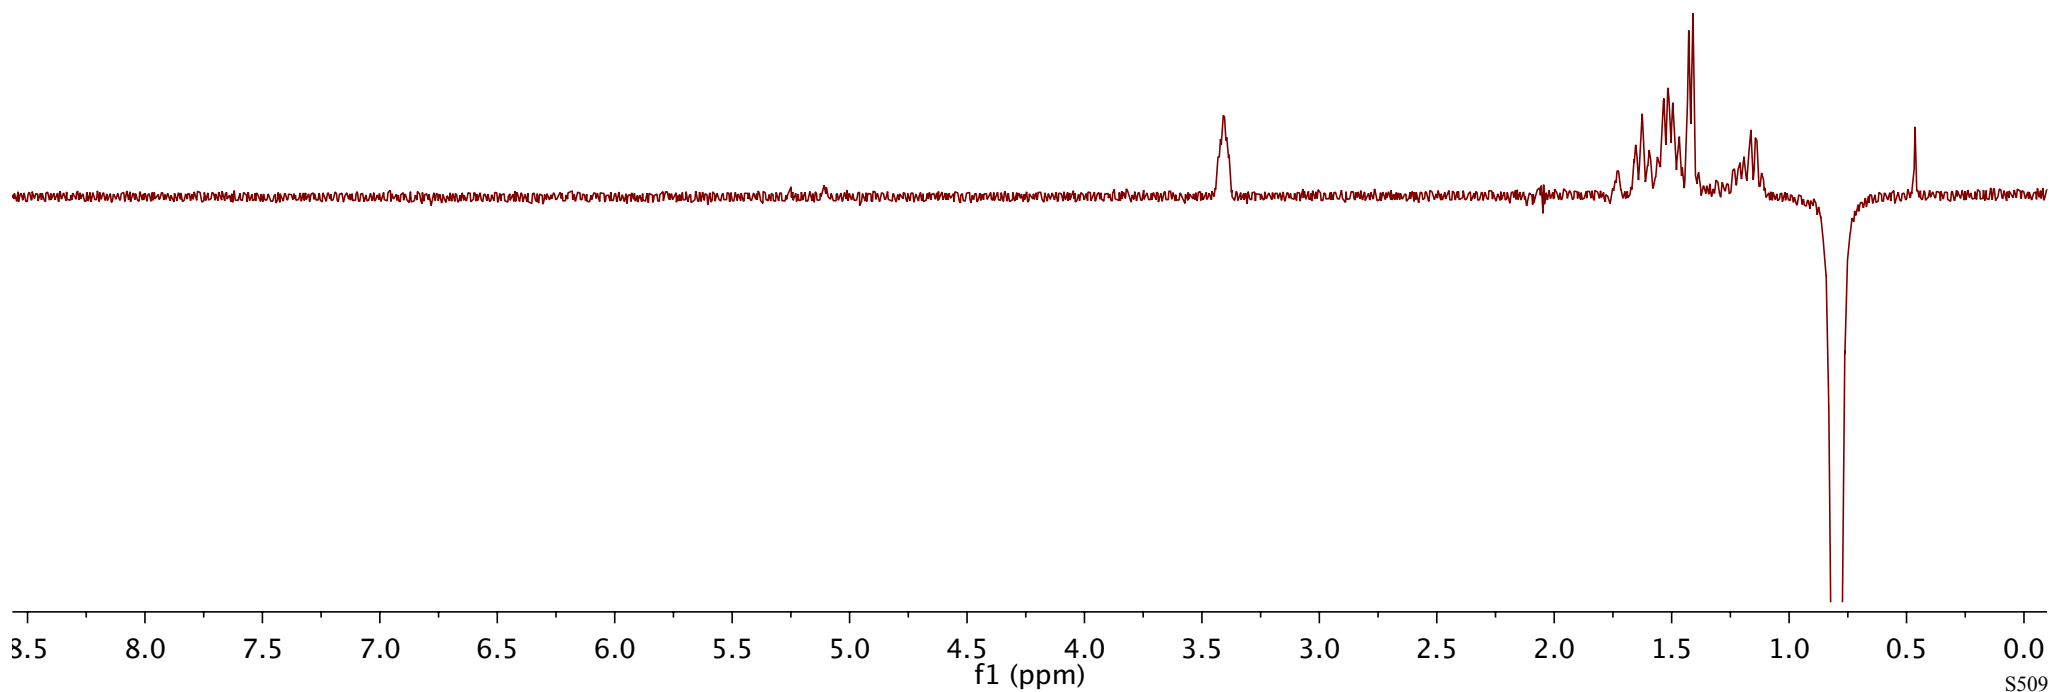

| Parameter              | Value             |
|------------------------|-------------------|
| Origin                 | Varian            |
| Spectrometer           | inova             |
| Solvent                | CDCl <sub>3</sub> |
| Temperature            | 20.0              |
| Pulse Sequence         | s2pul             |
| Experiment             | 1D                |
| Probe                  | hcn               |
| Receiver Gain          | 44                |
| Relaxation Delay       | 0.0000            |
| Pulse Width            | 0.0000            |
| Acquisition Time       | 4.0960            |
| Spectrometer Frequency | 500.07            |
| Spectral Width         | 8000.0            |
| Lowest Frequency       | -1520.4           |
| Nucleus                | <sup>1</sup> H    |
| Acquired Size          | 32768             |
| Spectral Size          | 65536             |

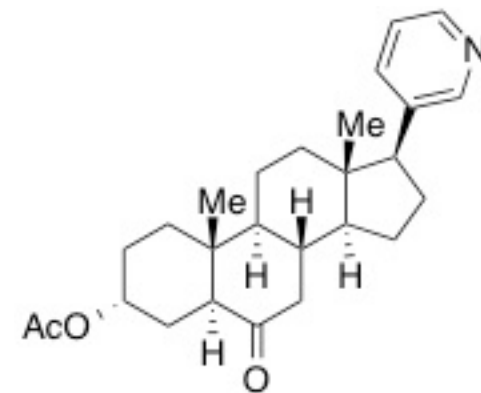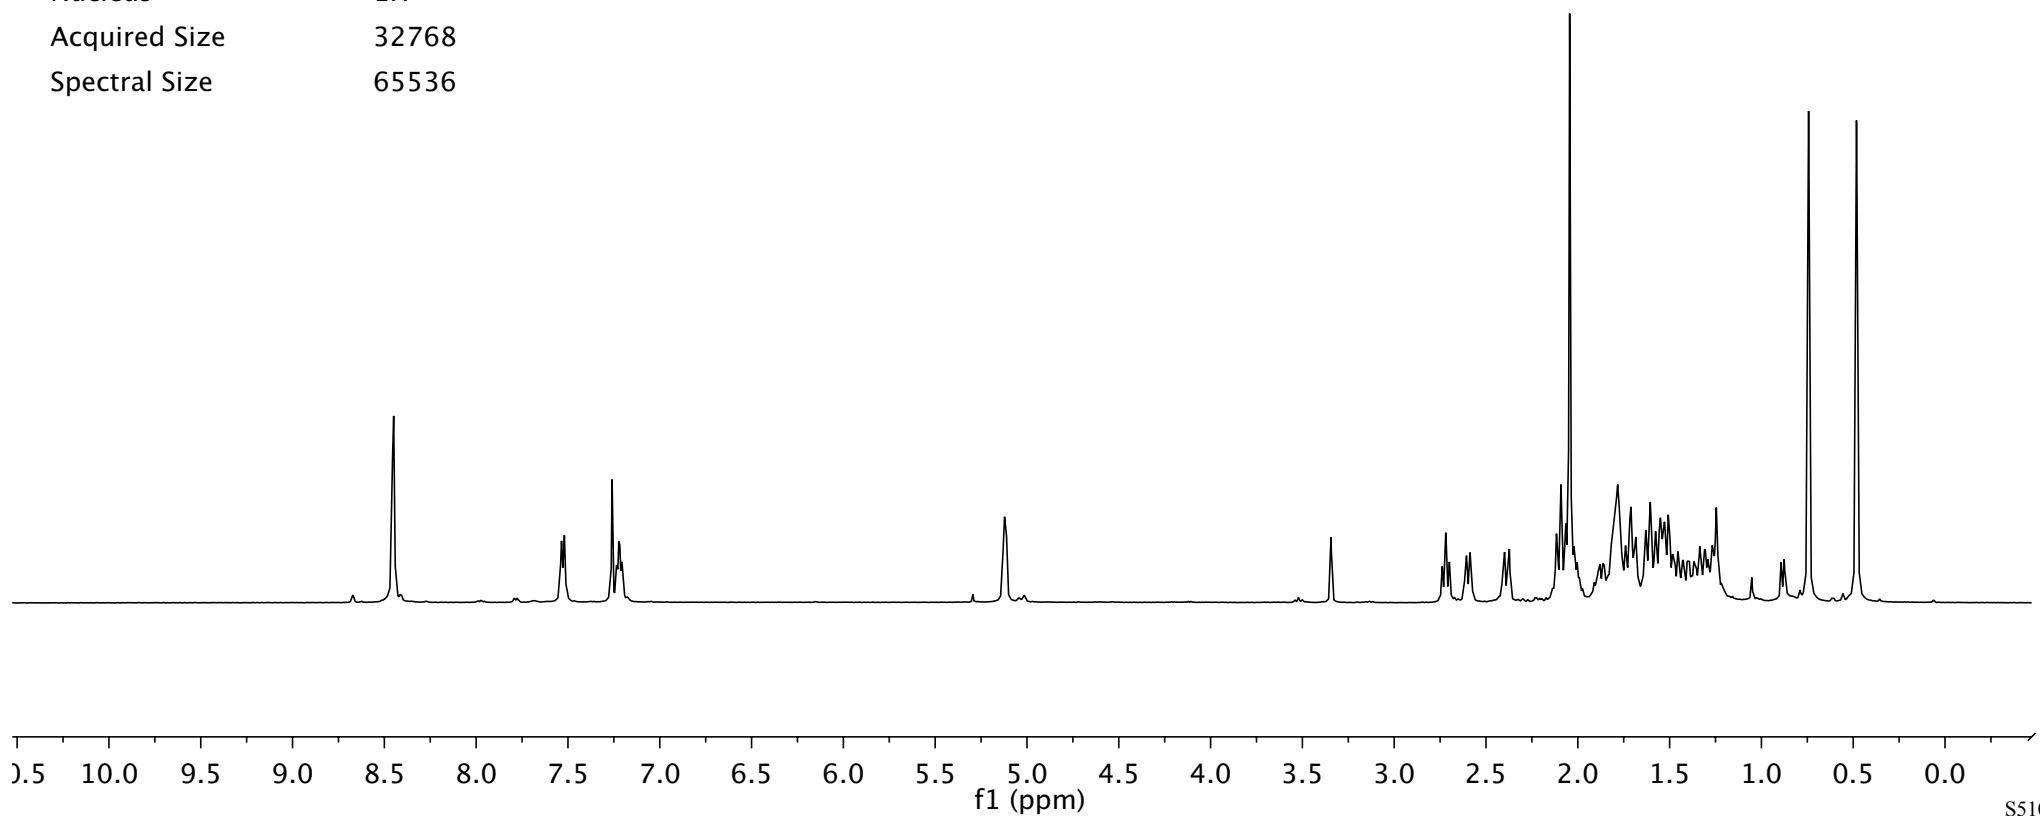

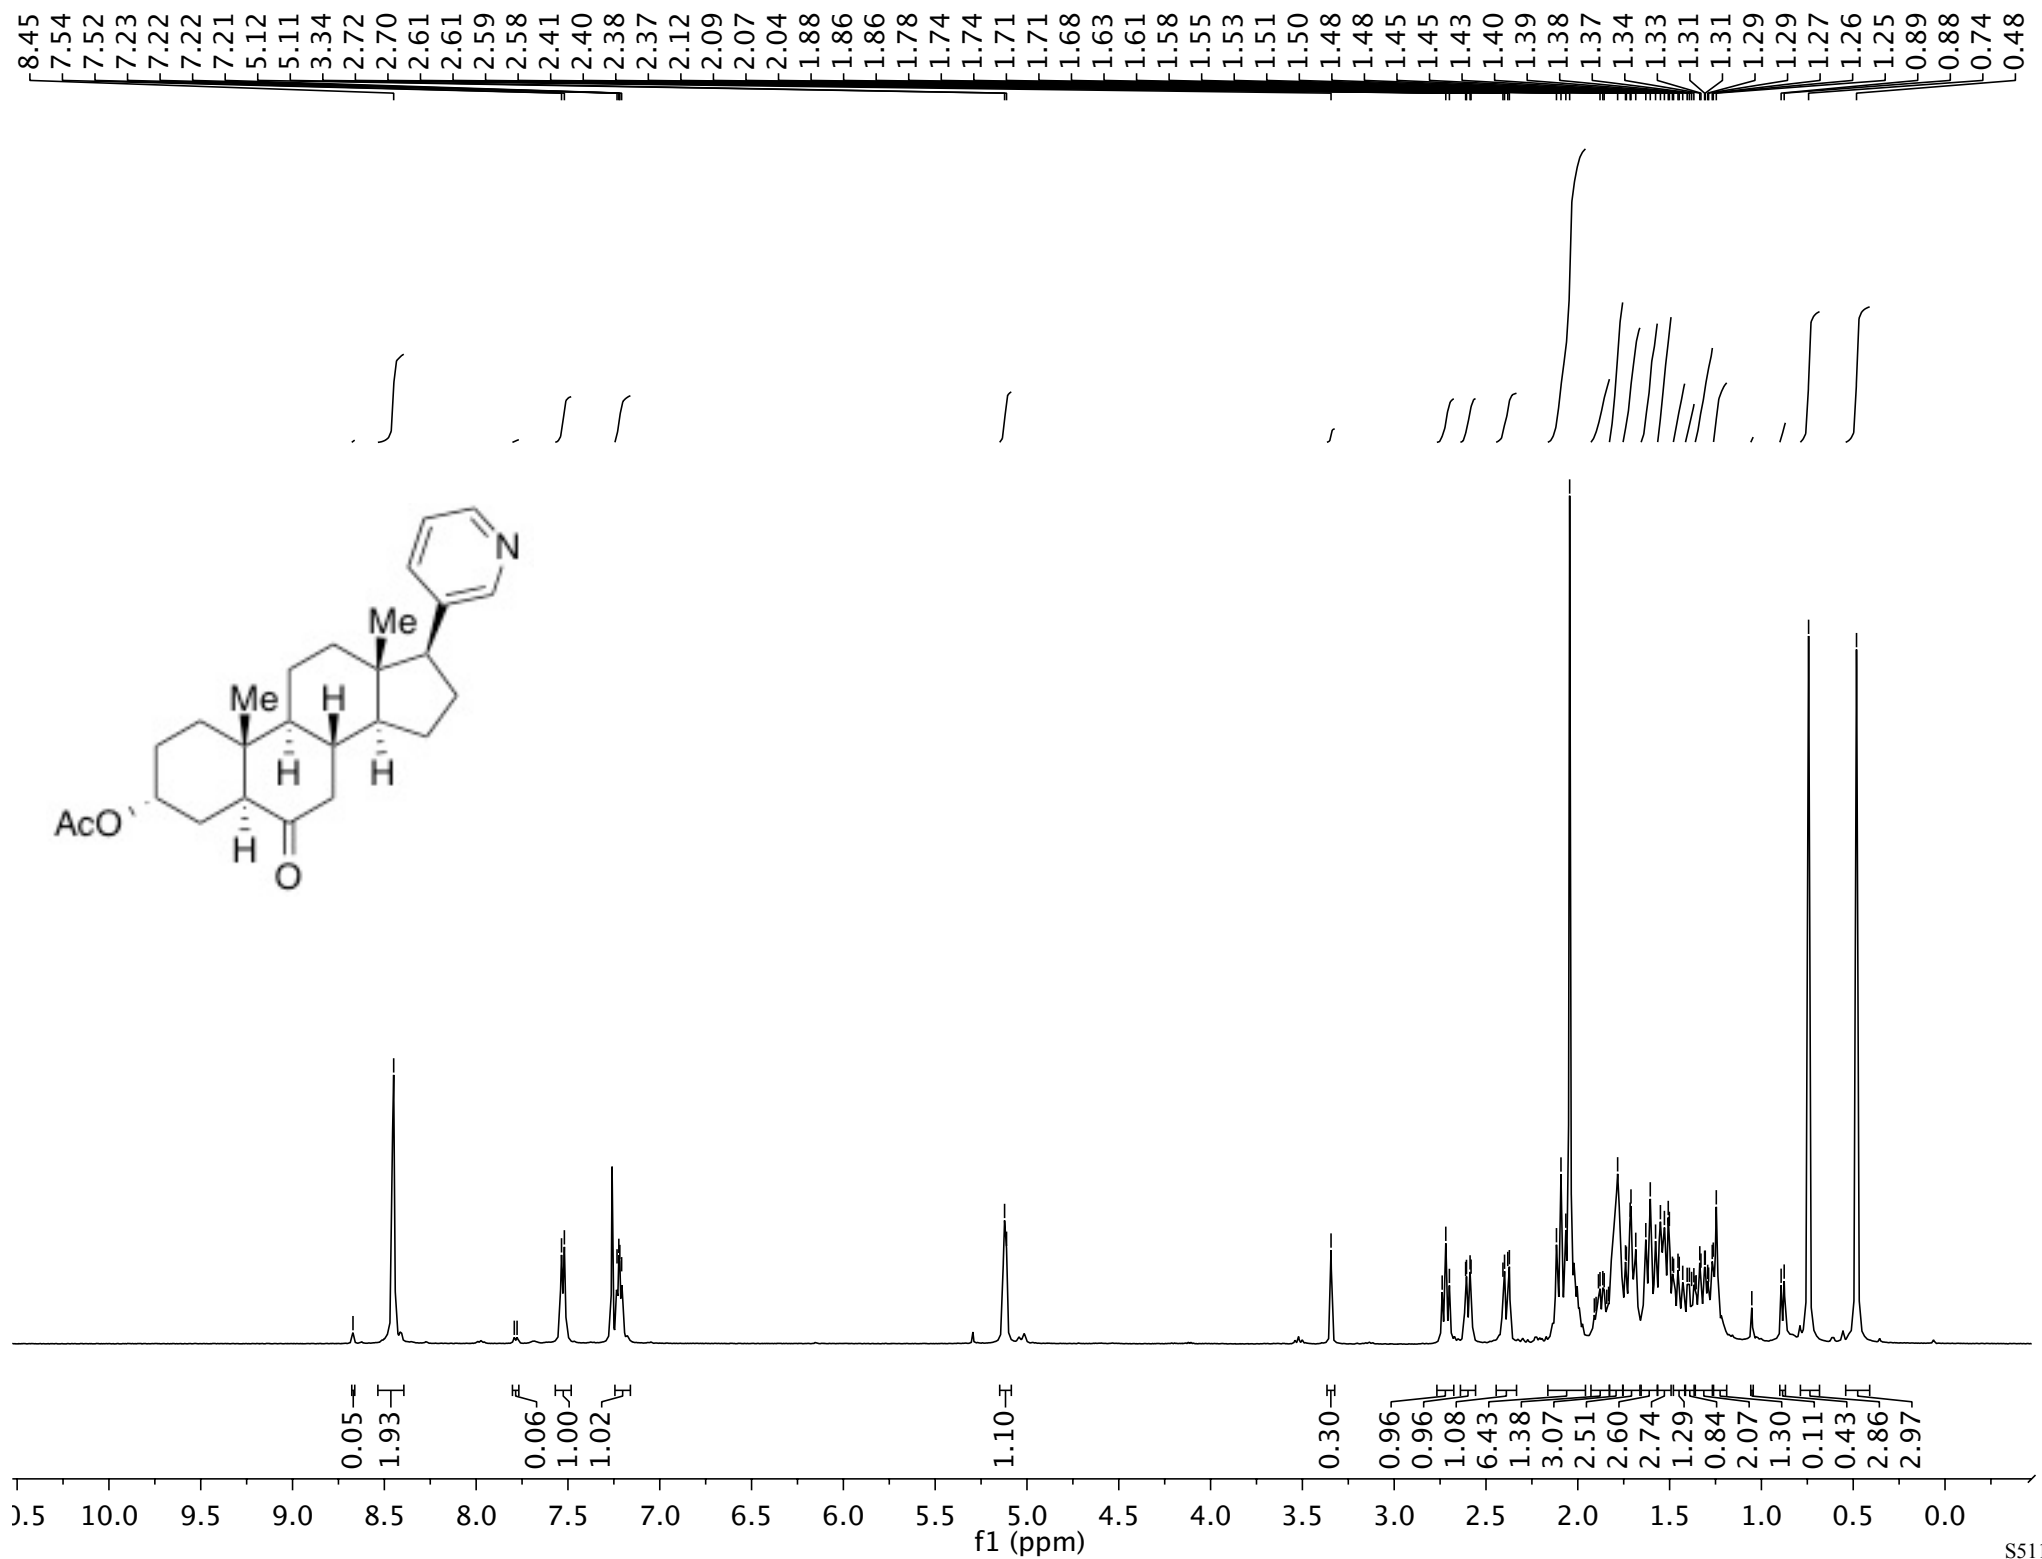



| Parameter              | Value           |
|------------------------|-----------------|
| Origin                 | Varian          |
| Spectrometer           | inova           |
| Solvent                | CDCl3           |
| Temperature            | 20.0            |
| Pulse Sequence         | s2pul           |
| Experiment             | 1D              |
| Probe                  | quad94          |
| Receiver Gain          | 60              |
| Relaxation Delay       | 1.0000          |
| Pulse Width            | 0.0000          |
| Acquisition Time       | 1.3107          |
| Spectrometer Frequency | 100.58          |
| Spectral Width         | 25000.0         |
| Lowest Frequency       | -1024.7         |
| Nucleus                | <sup>13</sup> C |
| Acquired Size          | 32768           |
| Spectral Size          | 65536           |

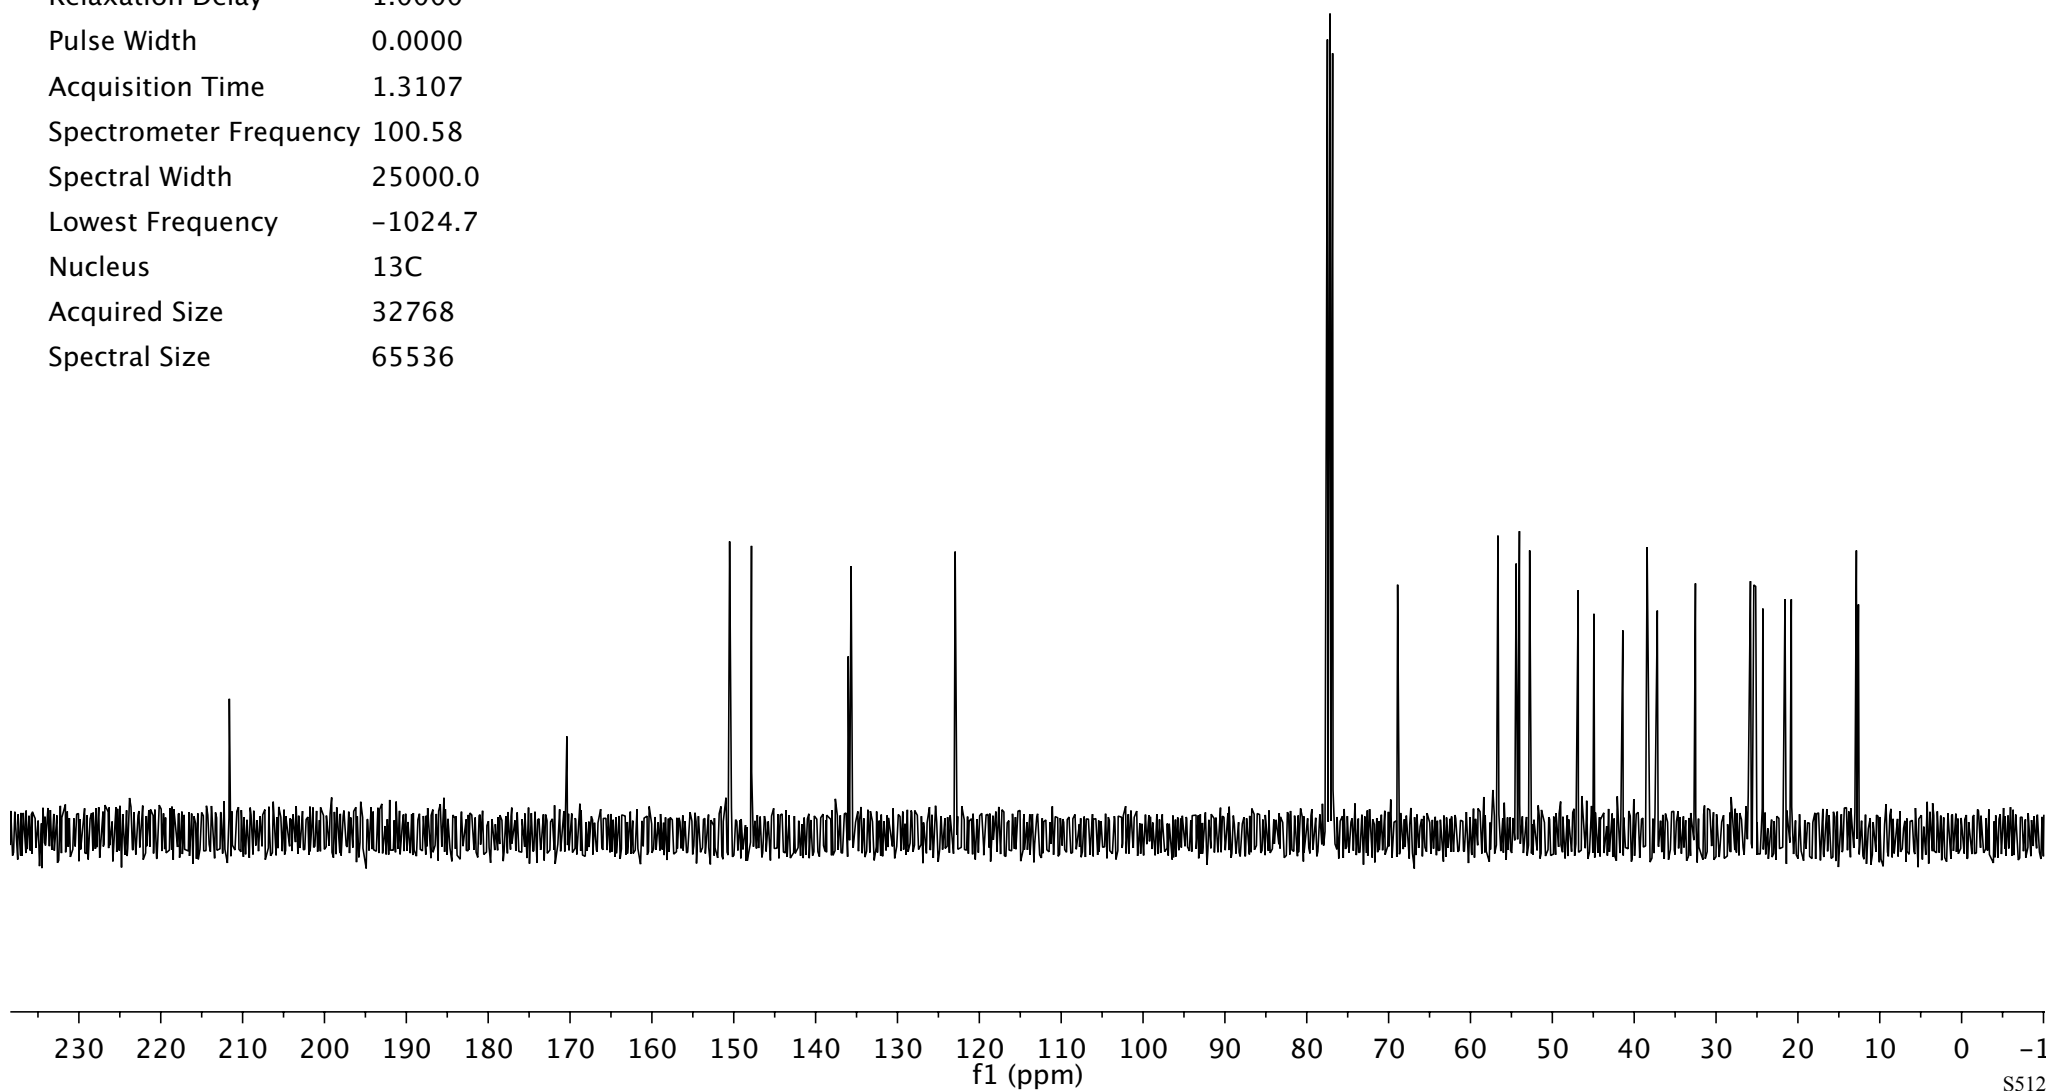

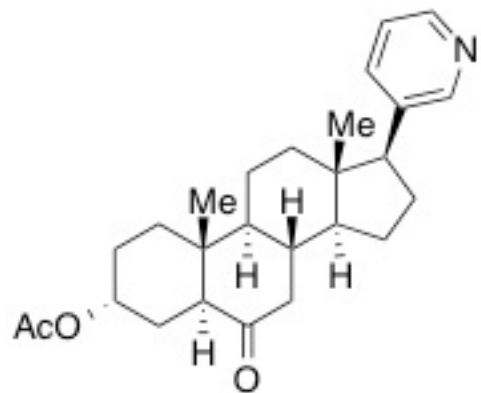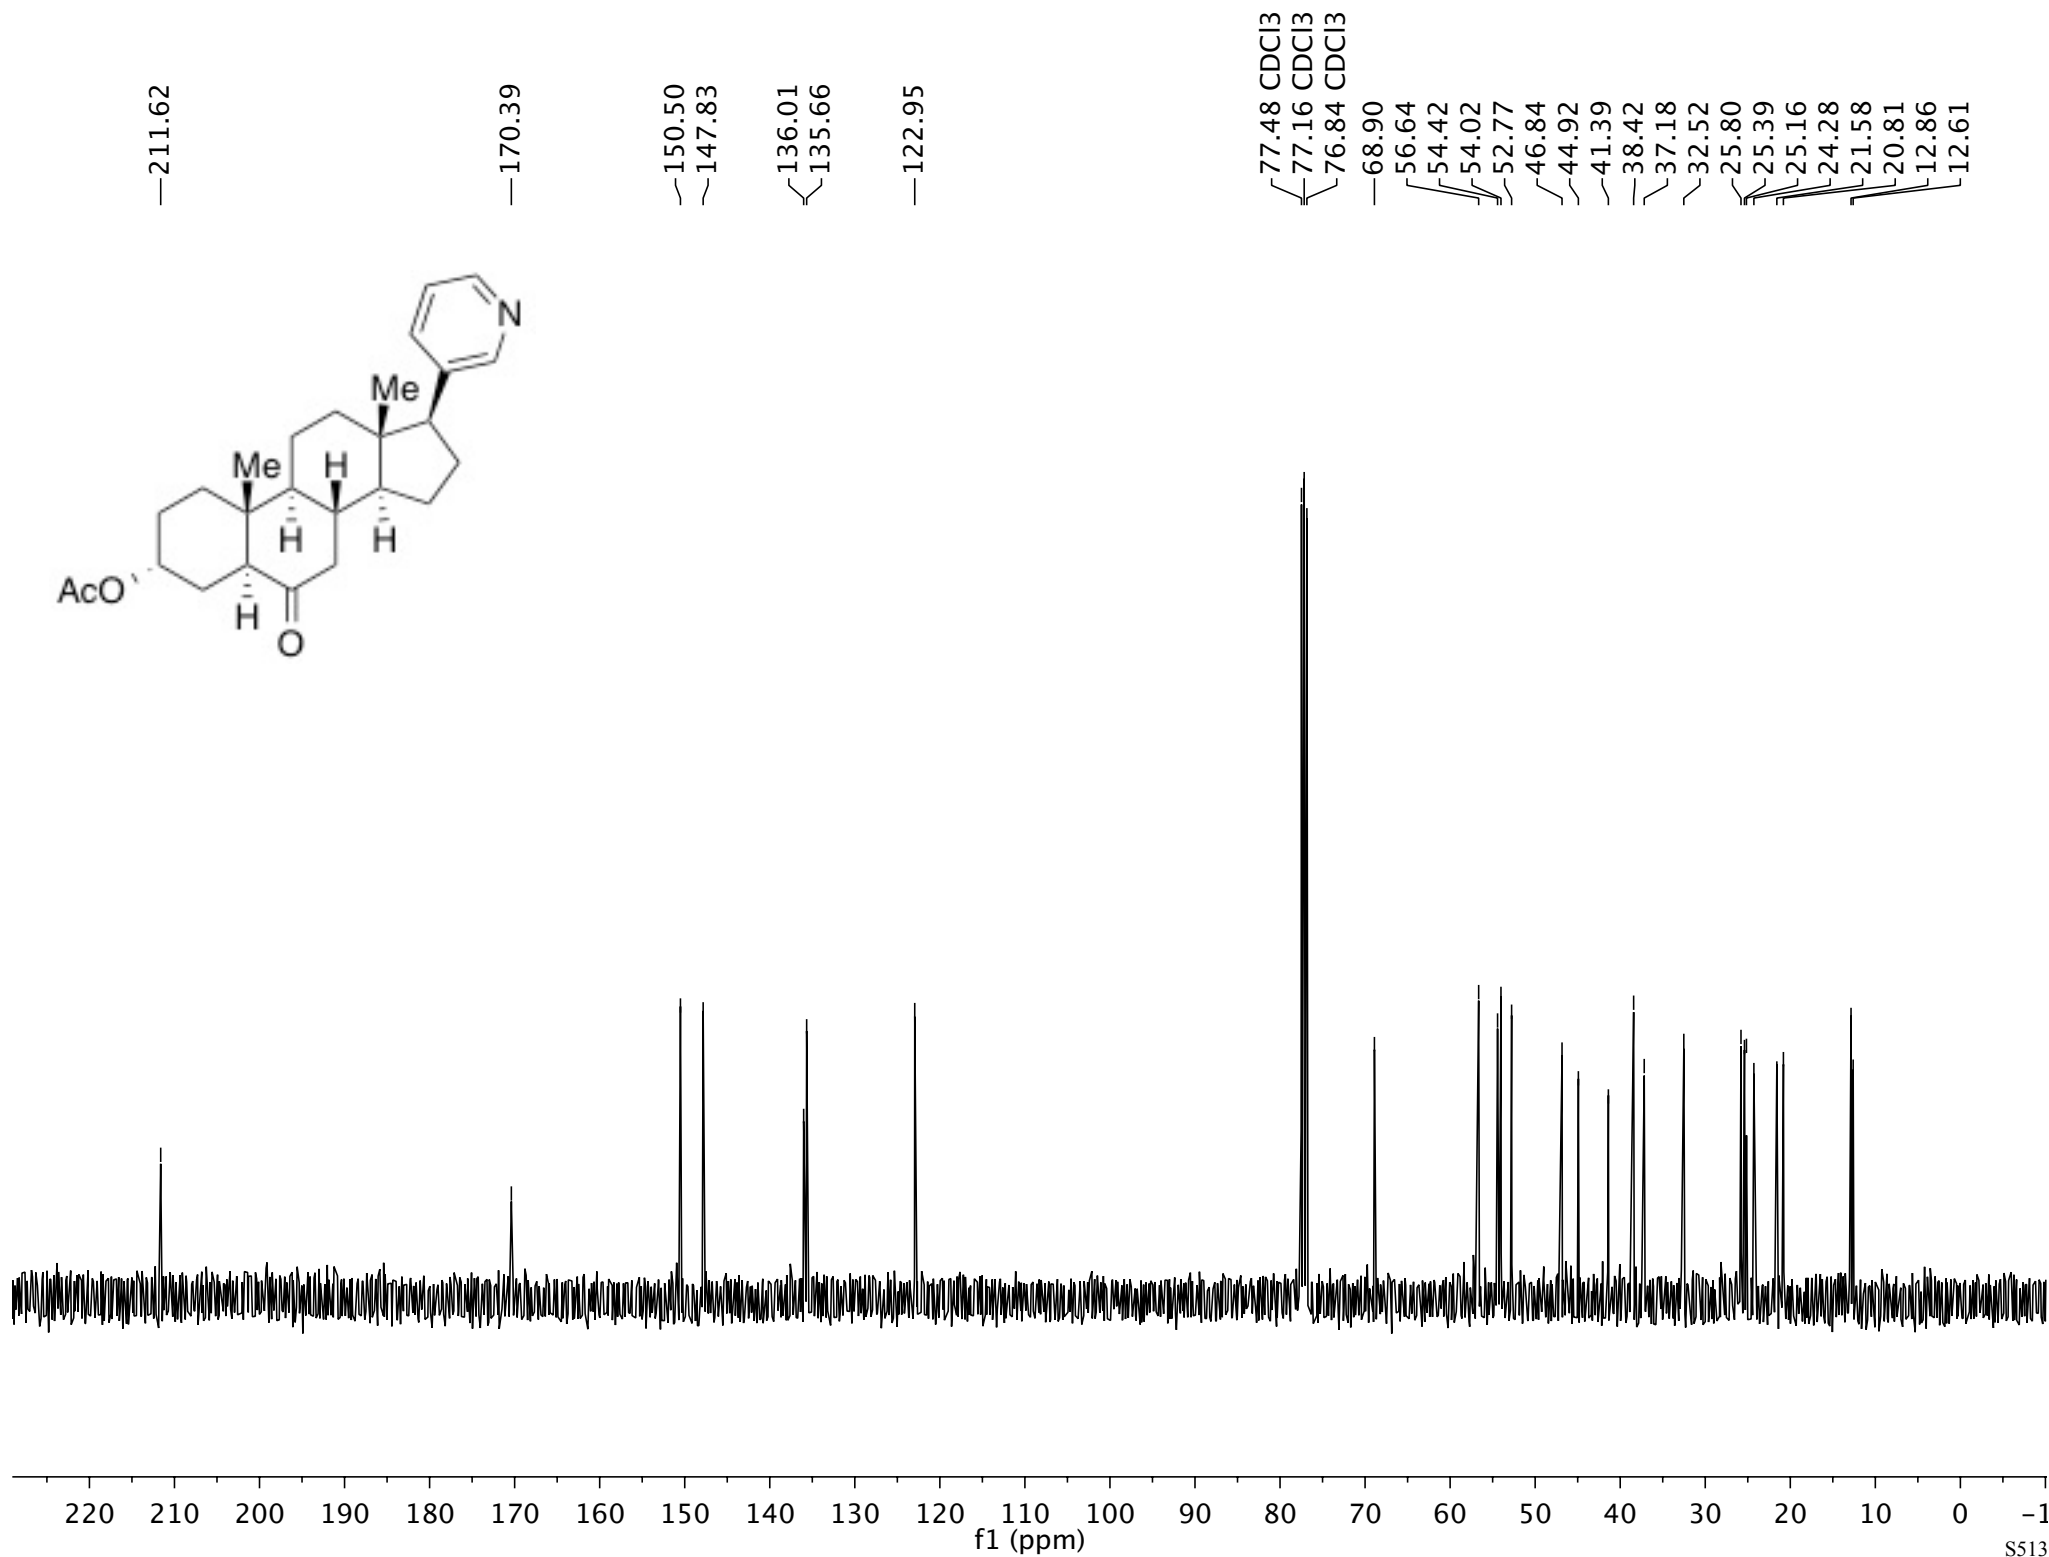

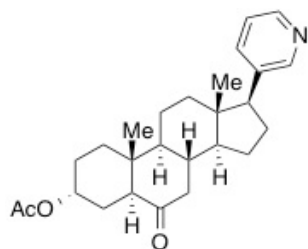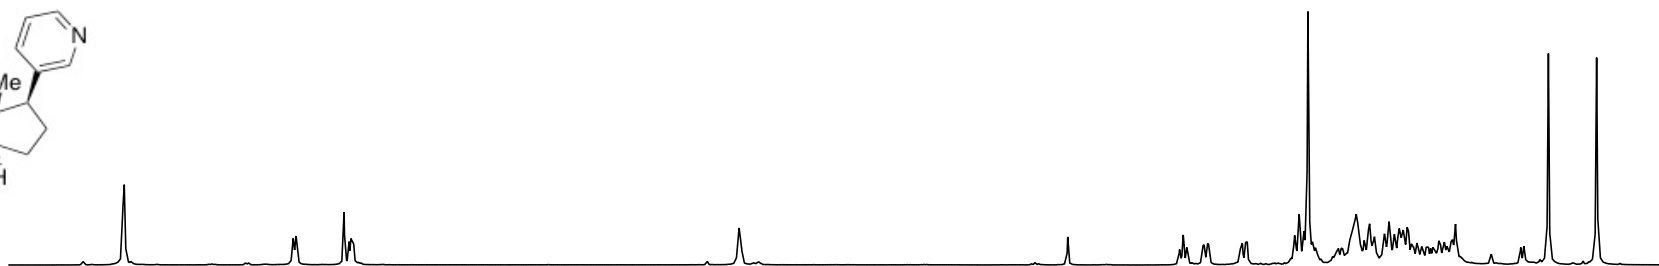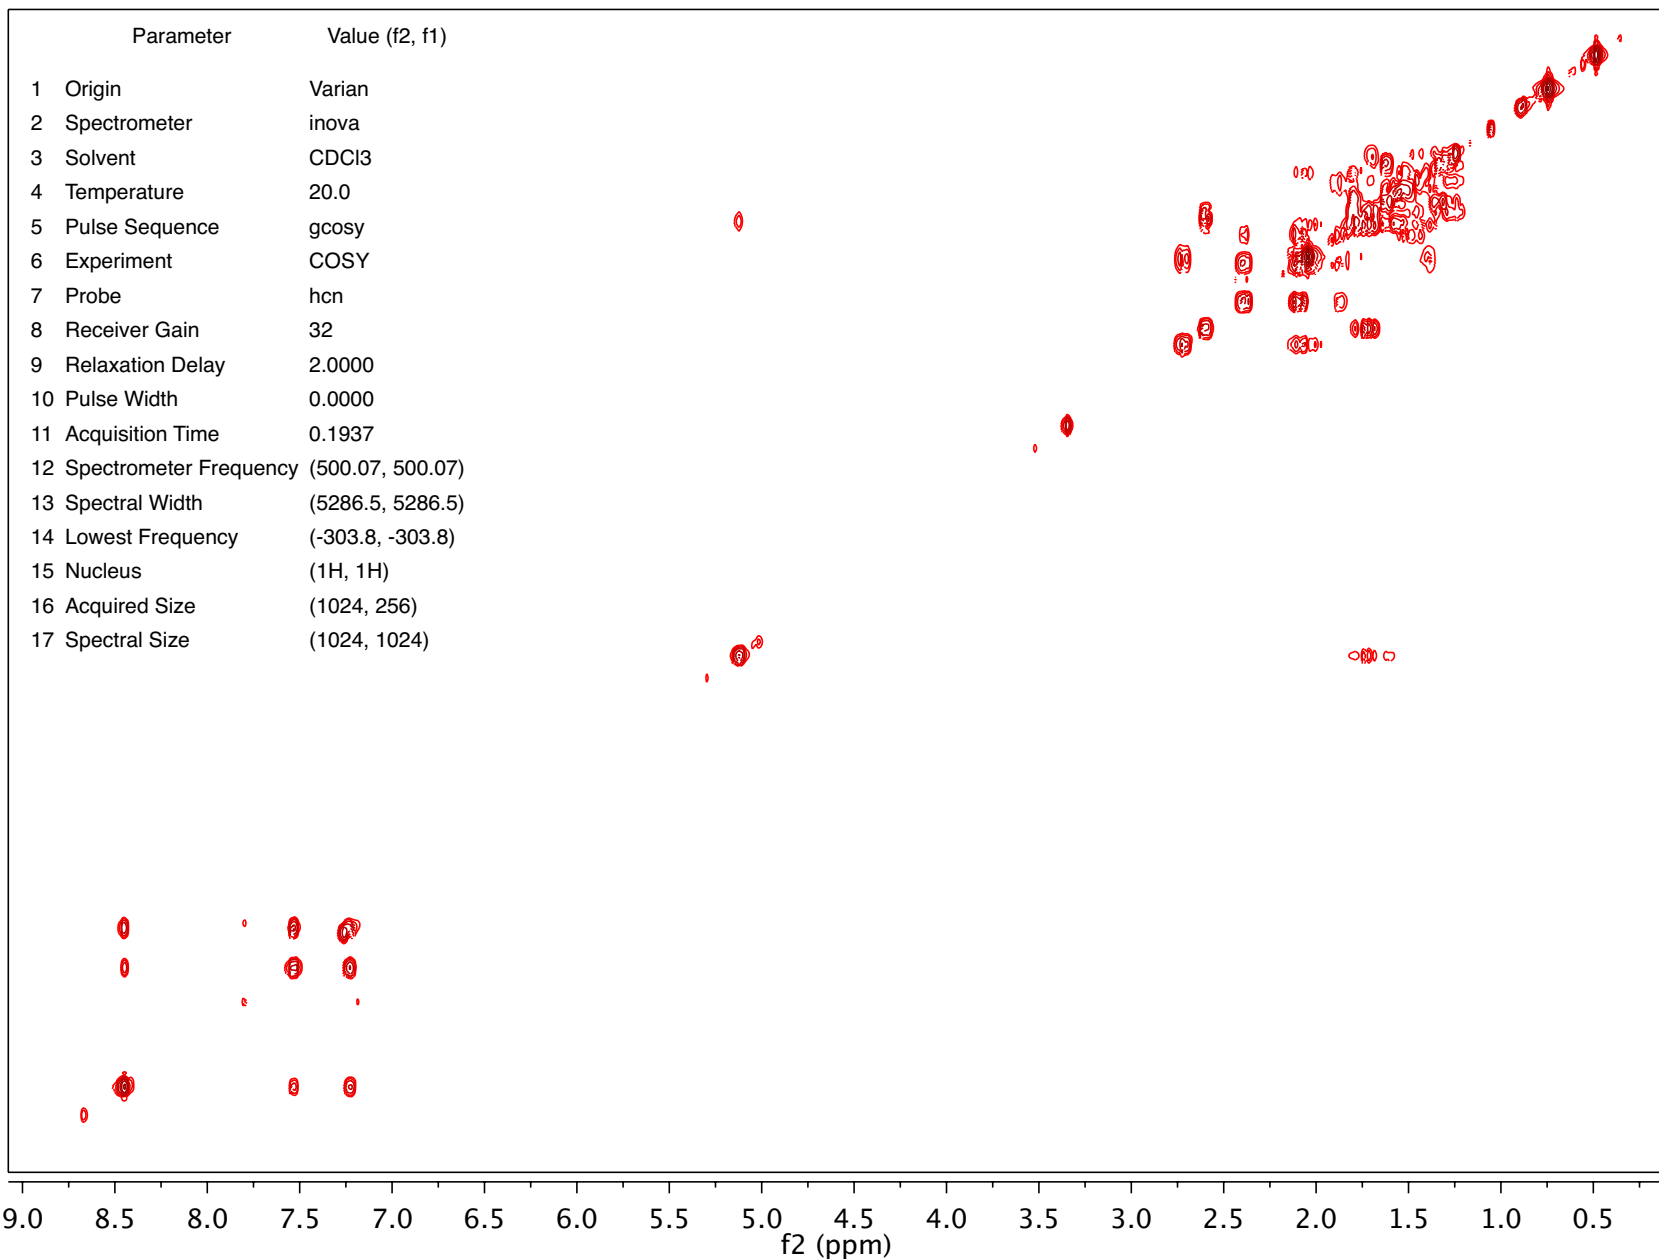

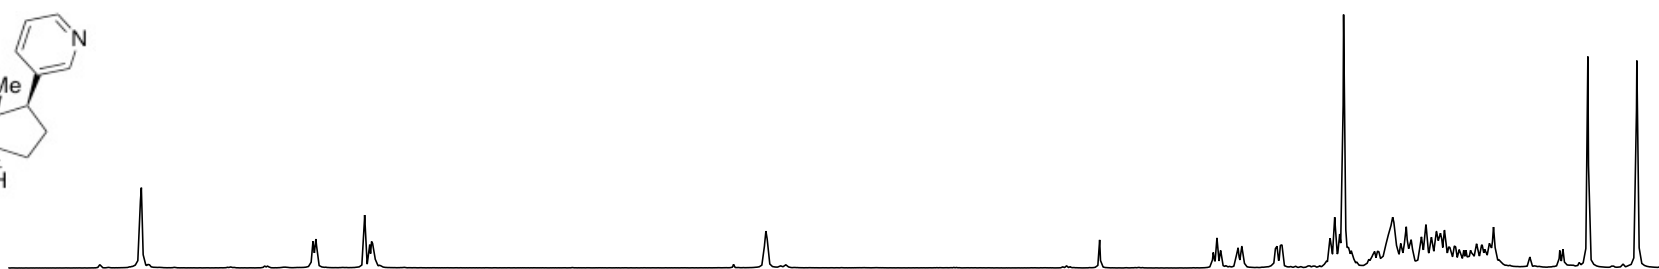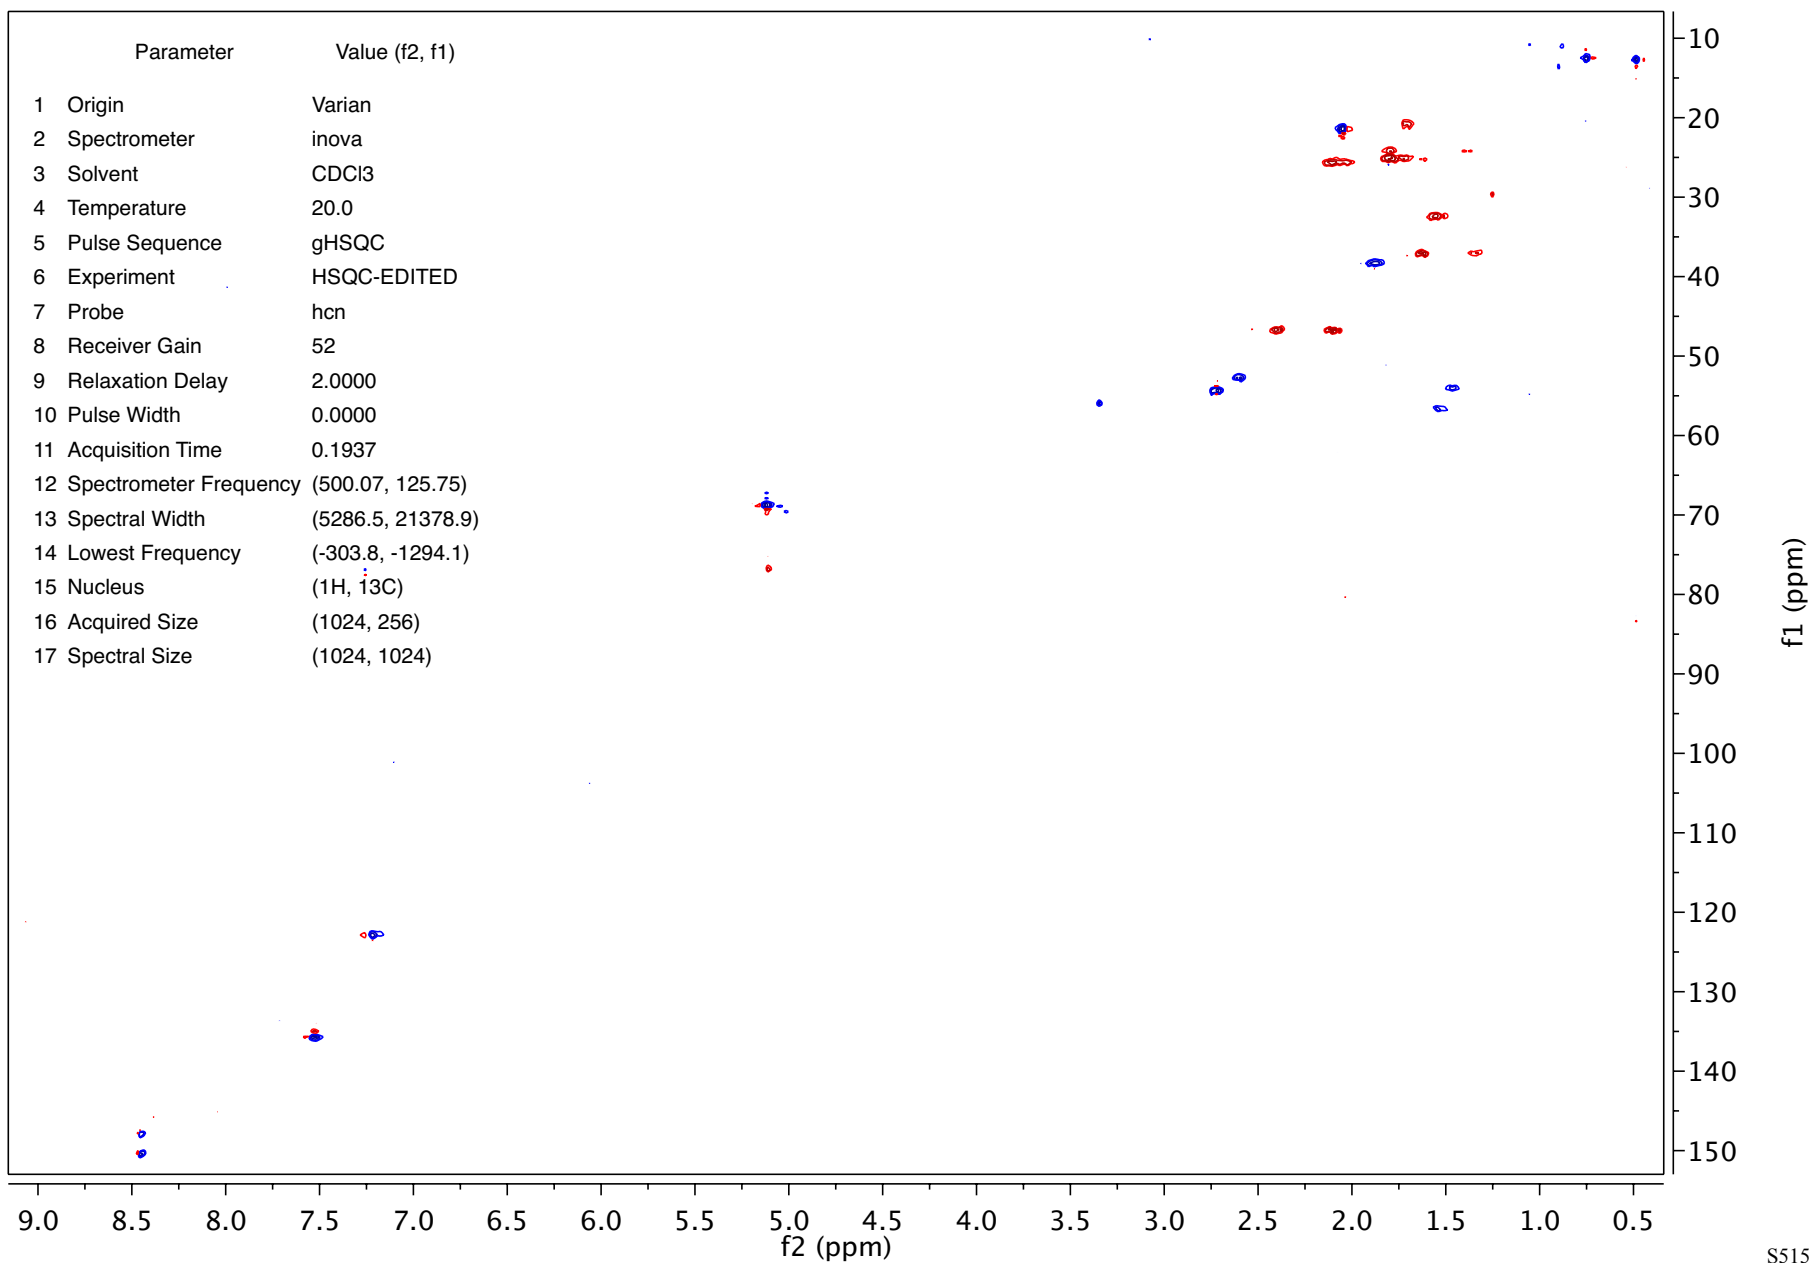

| Parameter                 | Value             |
|---------------------------|-------------------|
| 1 Origin                  | Varian            |
| 2 Spectrometer            | inova             |
| 3 Solvent                 | CDCl <sub>3</sub> |
| 4 Temperature             | 20.0              |
| 5 Pulse Sequence          | s2pul             |
| 6 Experiment              | 1D                |
| 7 Probe                   | quad94            |
| 8 Number of Scans         | 8                 |
| 9 Receiver Gain           | 56                |
| 10 Relaxation Delay       | 0.0000            |
| 11 Pulse Width            | 0.0000            |
| 12 Acquisition Time       | 4.0960            |
| 13 Spectrometer Frequency | 399.95            |
| 14 Spectral Width         | 8000.0            |
| 15 Lowest Frequency       | -2424.5           |
| 16 Nucleus                | <sup>1</sup> H    |
| 17 Acquired Size          | 32768             |
| 18 Spectral Size          | 65536             |

— 7.3 CDCl<sub>3</sub>

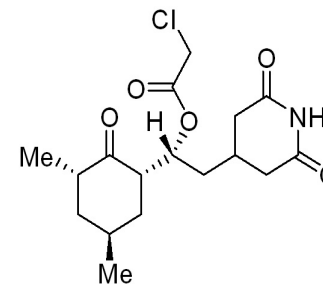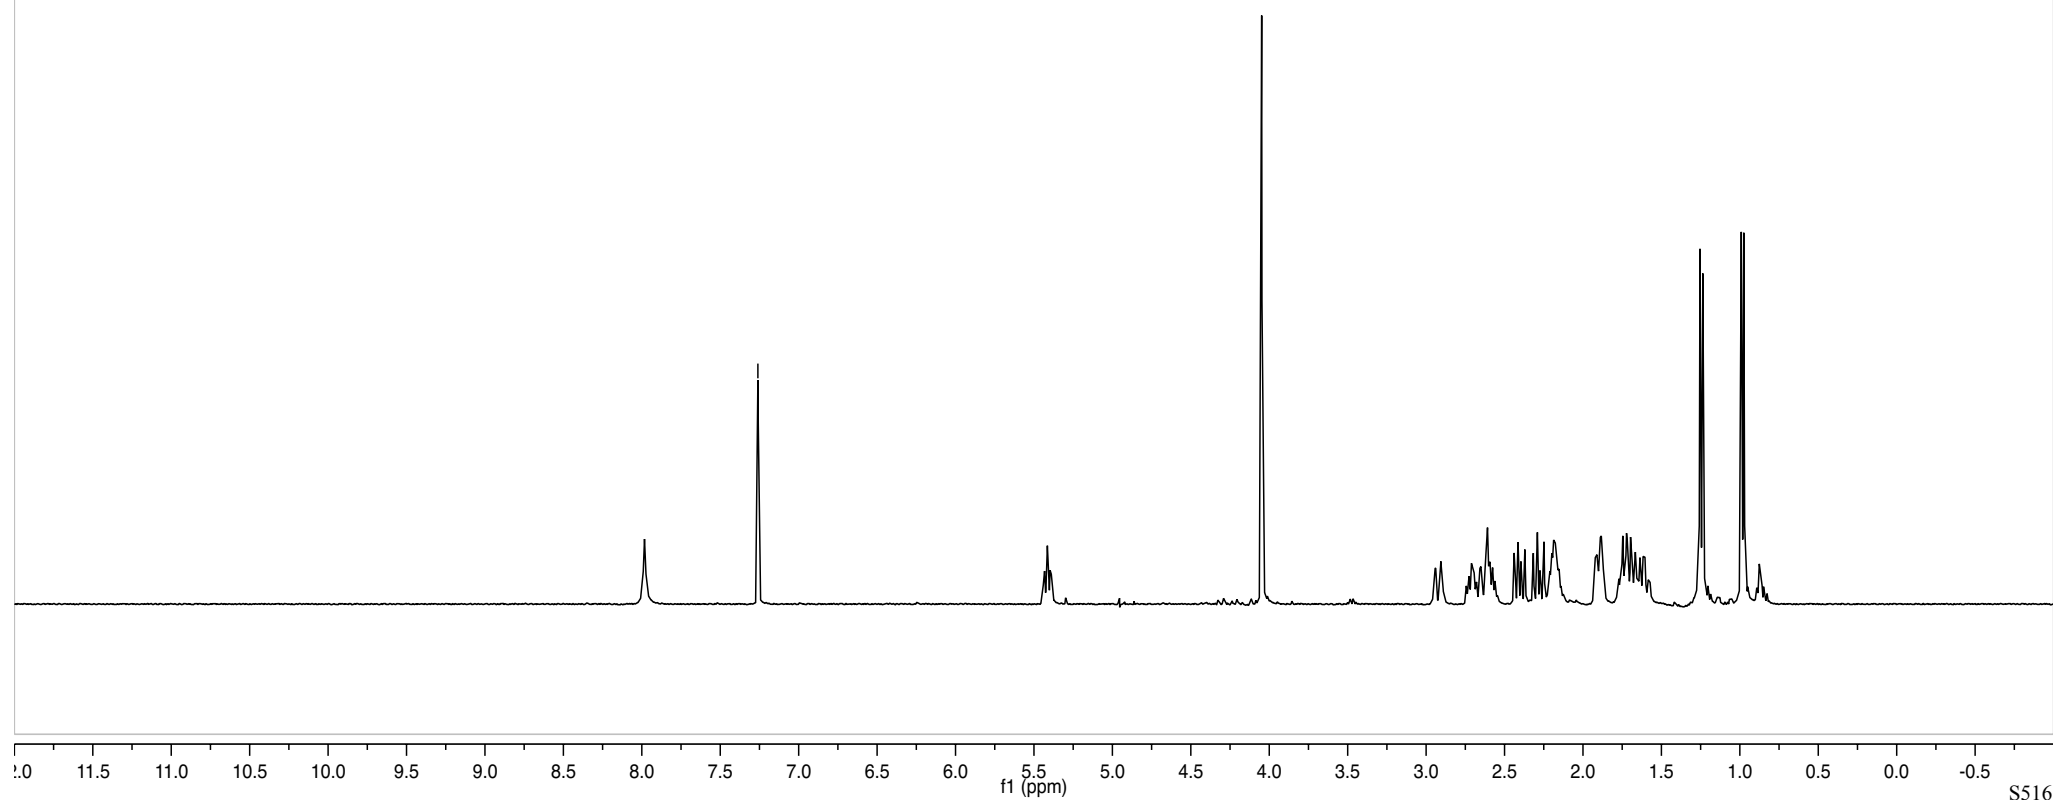

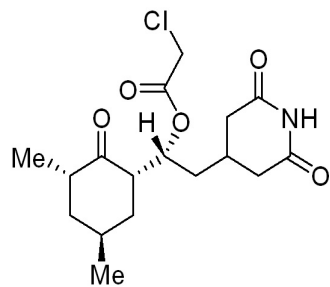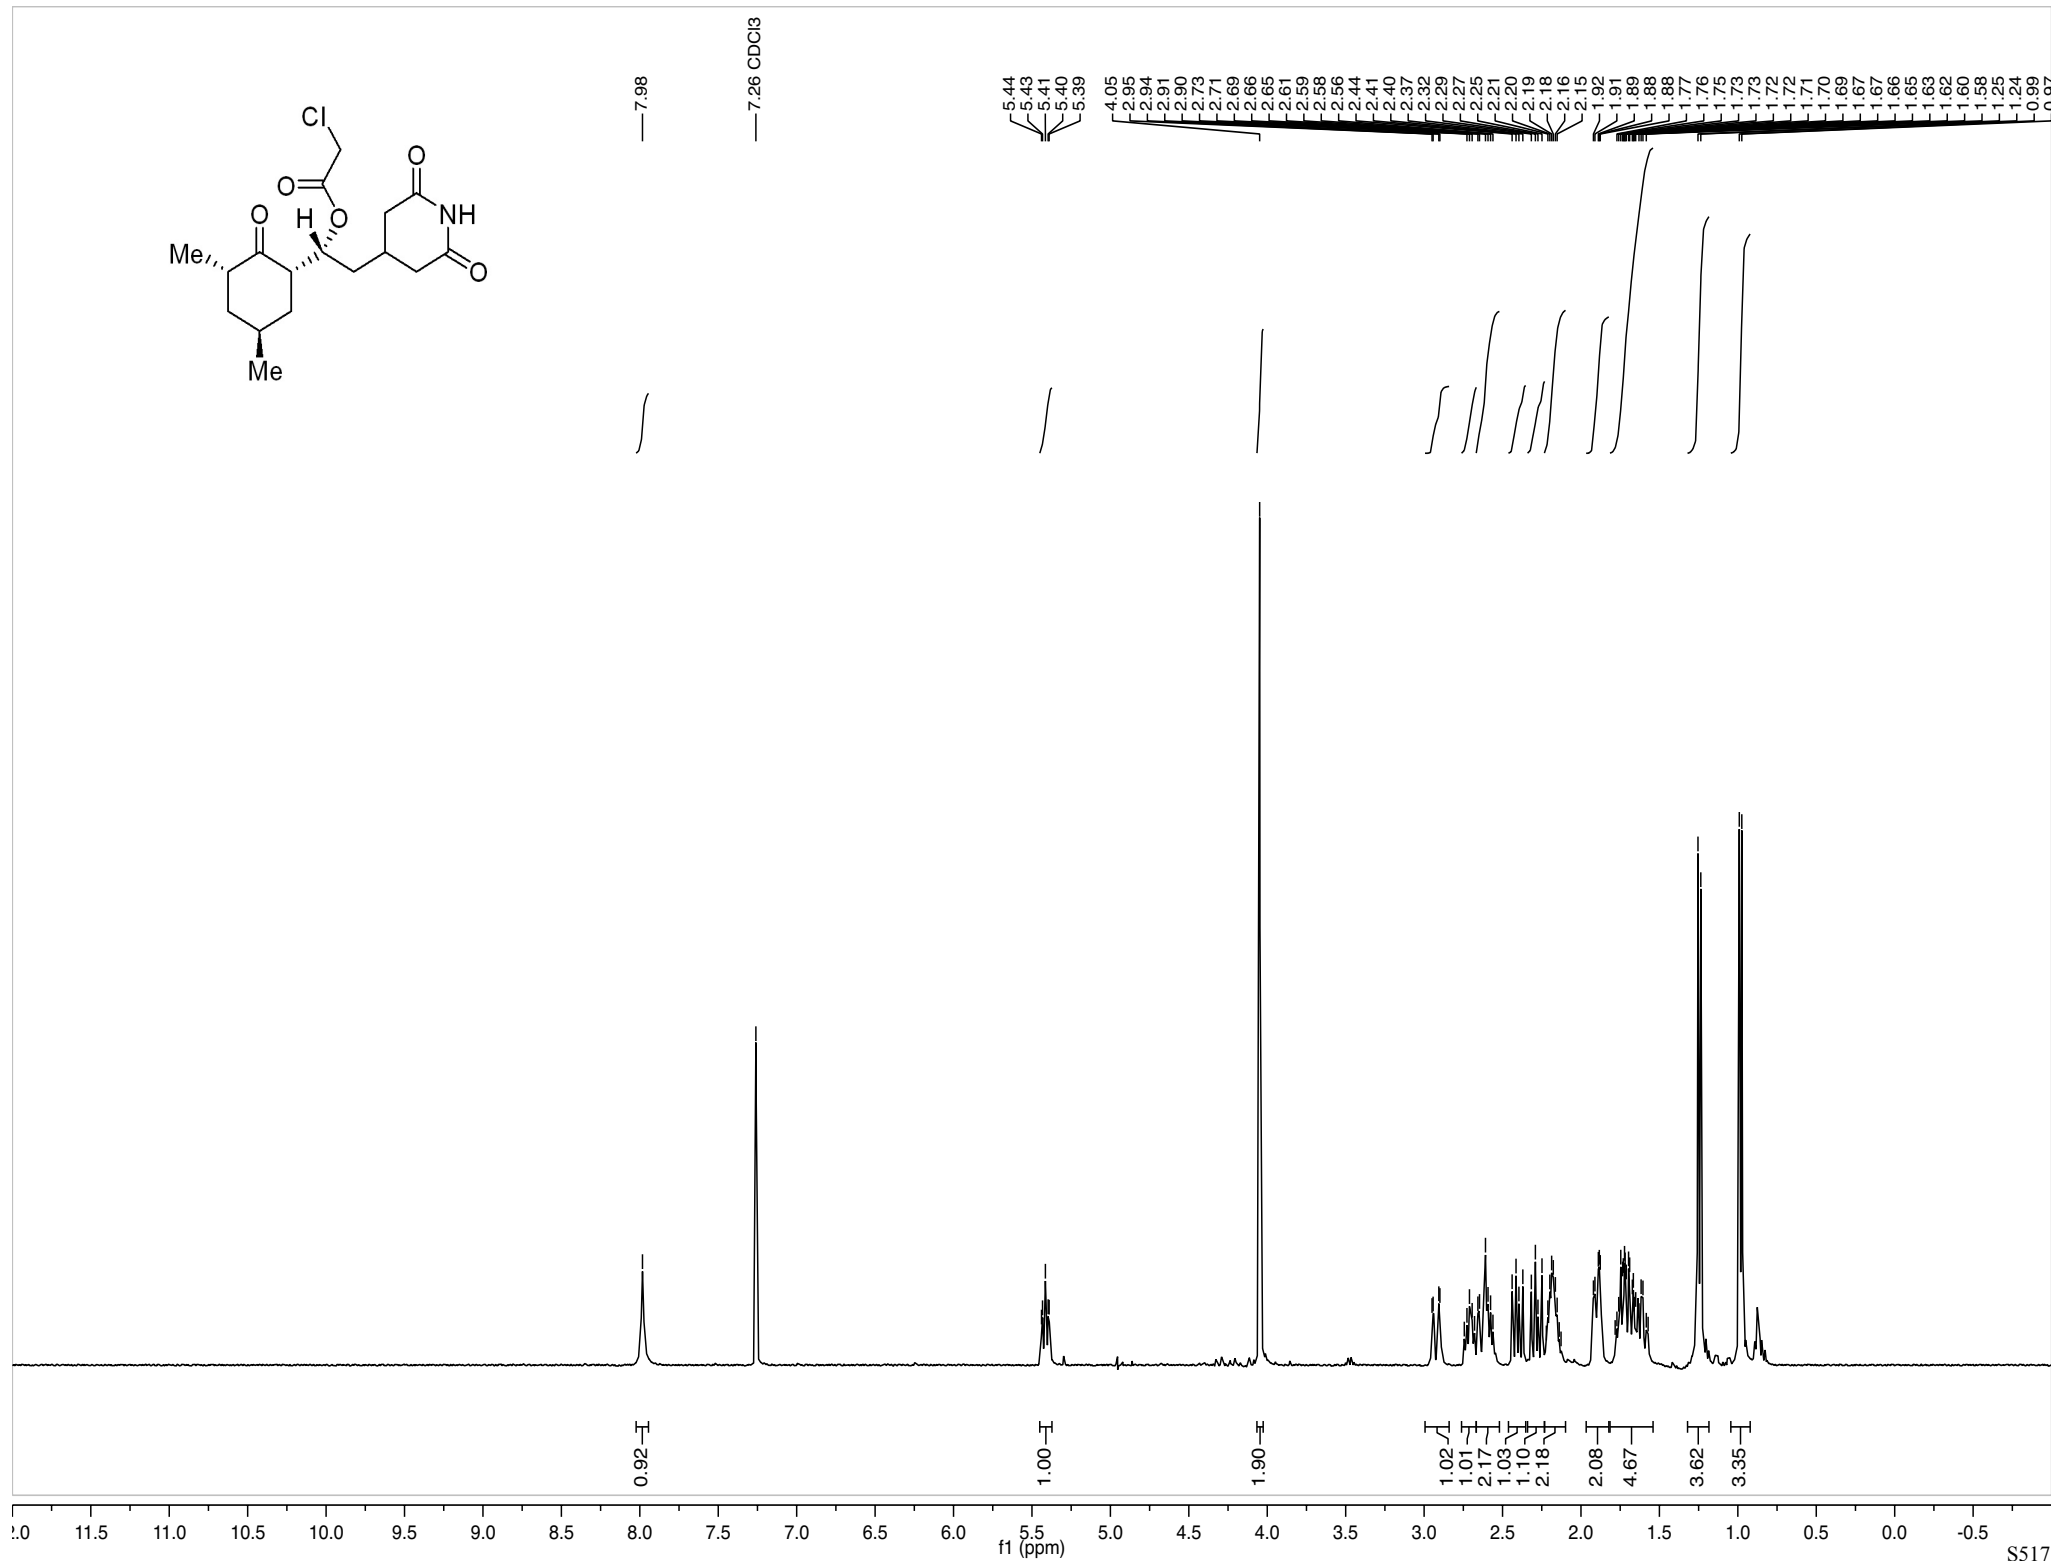

| Parameter                 | Value           |
|---------------------------|-----------------|
| 1 Origin                  | Varian          |
| 2 Spectrometer            | inova           |
| 3 Solvent                 | CDCl3           |
| 4 Temperature             | 20.0            |
| 5 Pulse Sequence          | s2pul           |
| 6 Experiment              | 1D              |
| 7 Probe                   | QUAD            |
| 8 Number of Scans         | 176             |
| 9 Receiver Gain           | 60              |
| 10 Relaxation Delay       | 1.0000          |
| 11 Pulse Width            | 0.0000          |
| 12 Acquisition Time       | 1.0863          |
| 13 Spectrometer Frequency | 125.66          |
| 14 Spectral Width         | 30165.9         |
| 15 Lowest Frequency       | -1276.0         |
| 16 Nucleus                | <sup>13</sup> C |
| 17 Acquired Size          | 32768           |
| 18 Spectral Size          | 65536           |

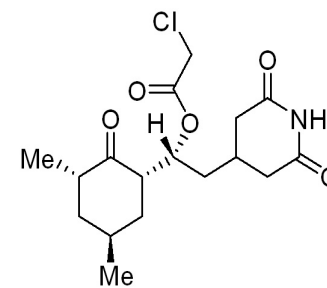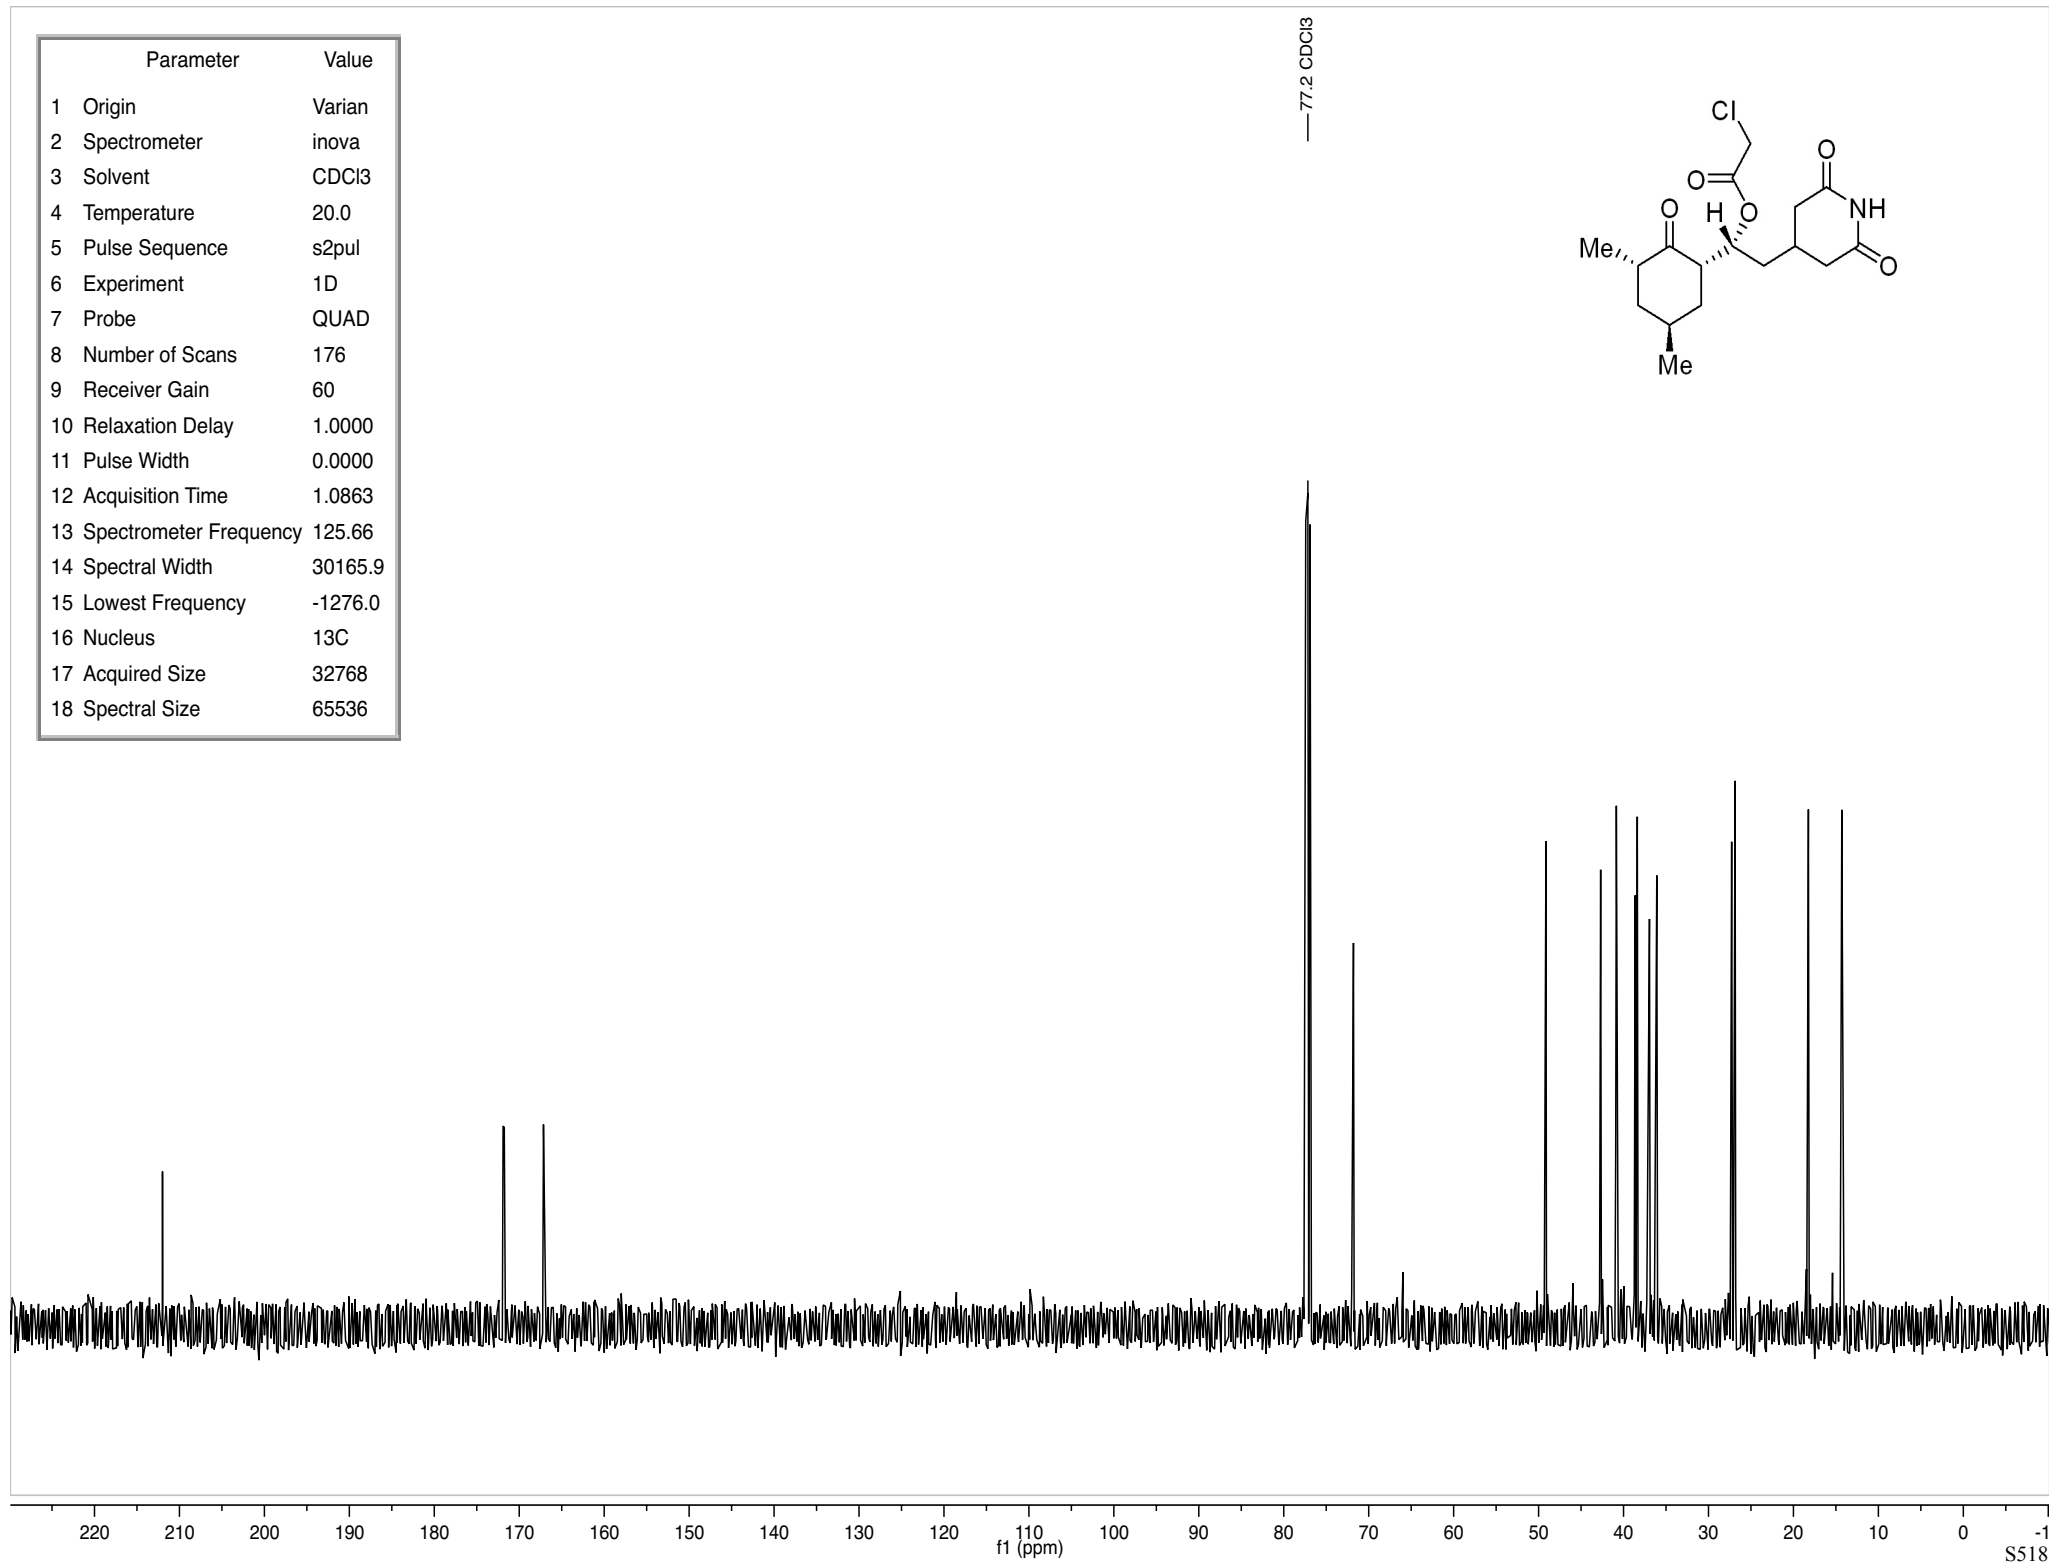

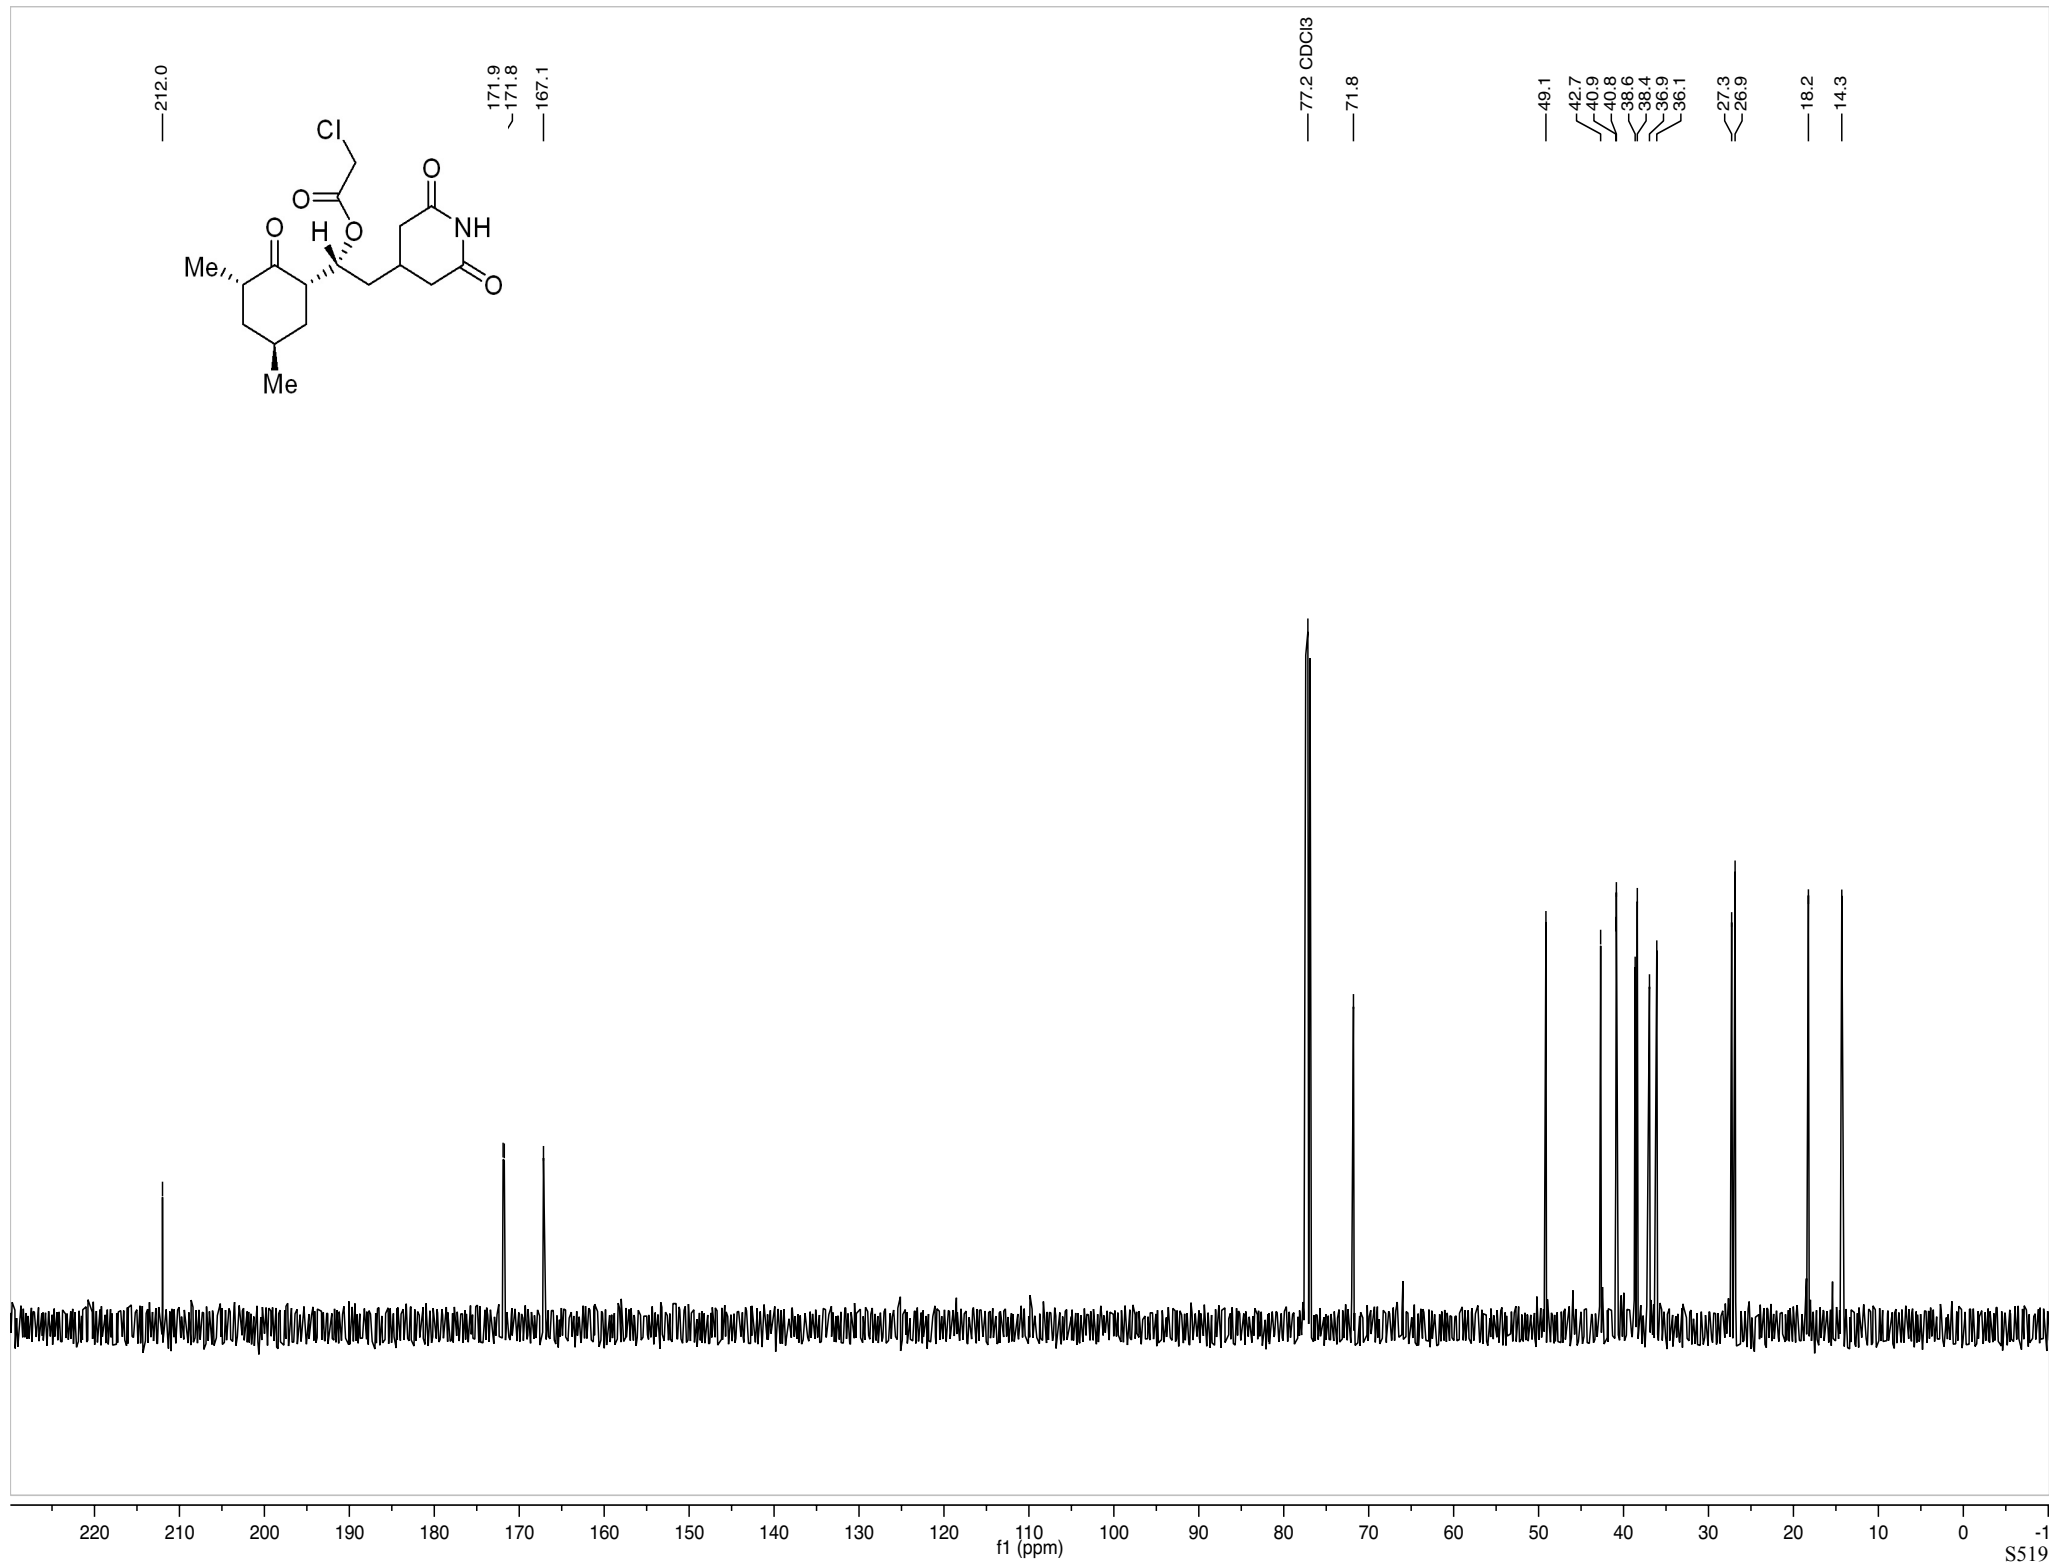



| Parameter                 | Value             |
|---------------------------|-------------------|
| 1 Origin                  | Varian            |
| 2 Spectrometer            | inova             |
| 3 Solvent                 | CDCl <sub>3</sub> |
| 4 Temperature             | 20.0              |
| 5 Pulse Sequence          | s2pul             |
| 6 Experiment              | 1D                |
| 7 Probe                   | QUAD              |
| 8 Number of Scans         | 8                 |
| 9 Receiver Gain           | 38                |
| 10 Relaxation Delay       | 0.0000            |
| 11 Pulse Width            | 0.0000            |
| 12 Acquisition Time       | 4.6645            |
| 13 Spectrometer Frequency | 499.69            |
| 14 Spectral Width         | 7024.9            |
| 15 Lowest Frequency       | -1021.4           |
| 16 Nucleus                | <sup>1</sup> H    |
| 17 Acquired Size          | 32768             |
| 18 Spectral Size          | 65536             |

— 7.3 CDCl<sub>3</sub>

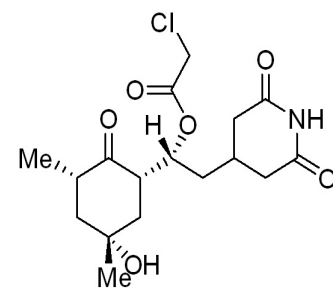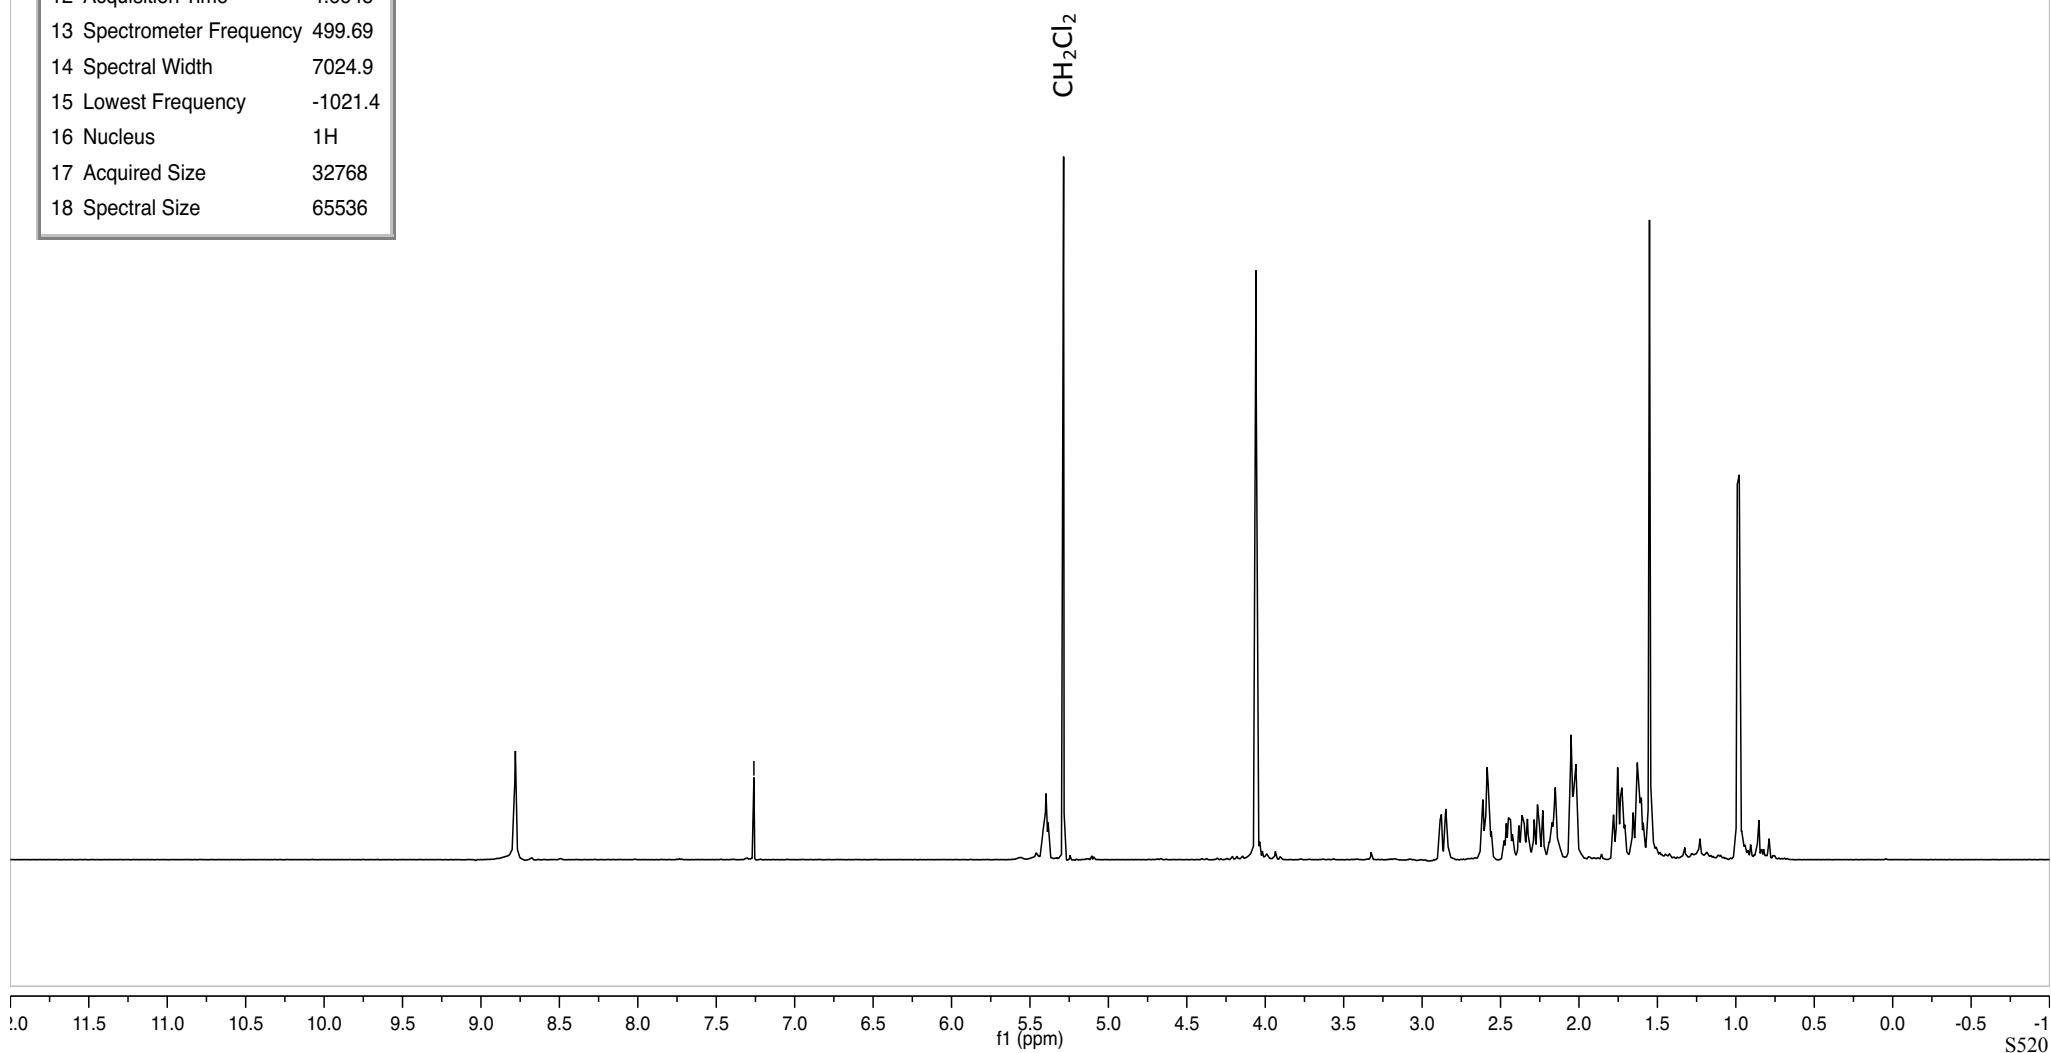

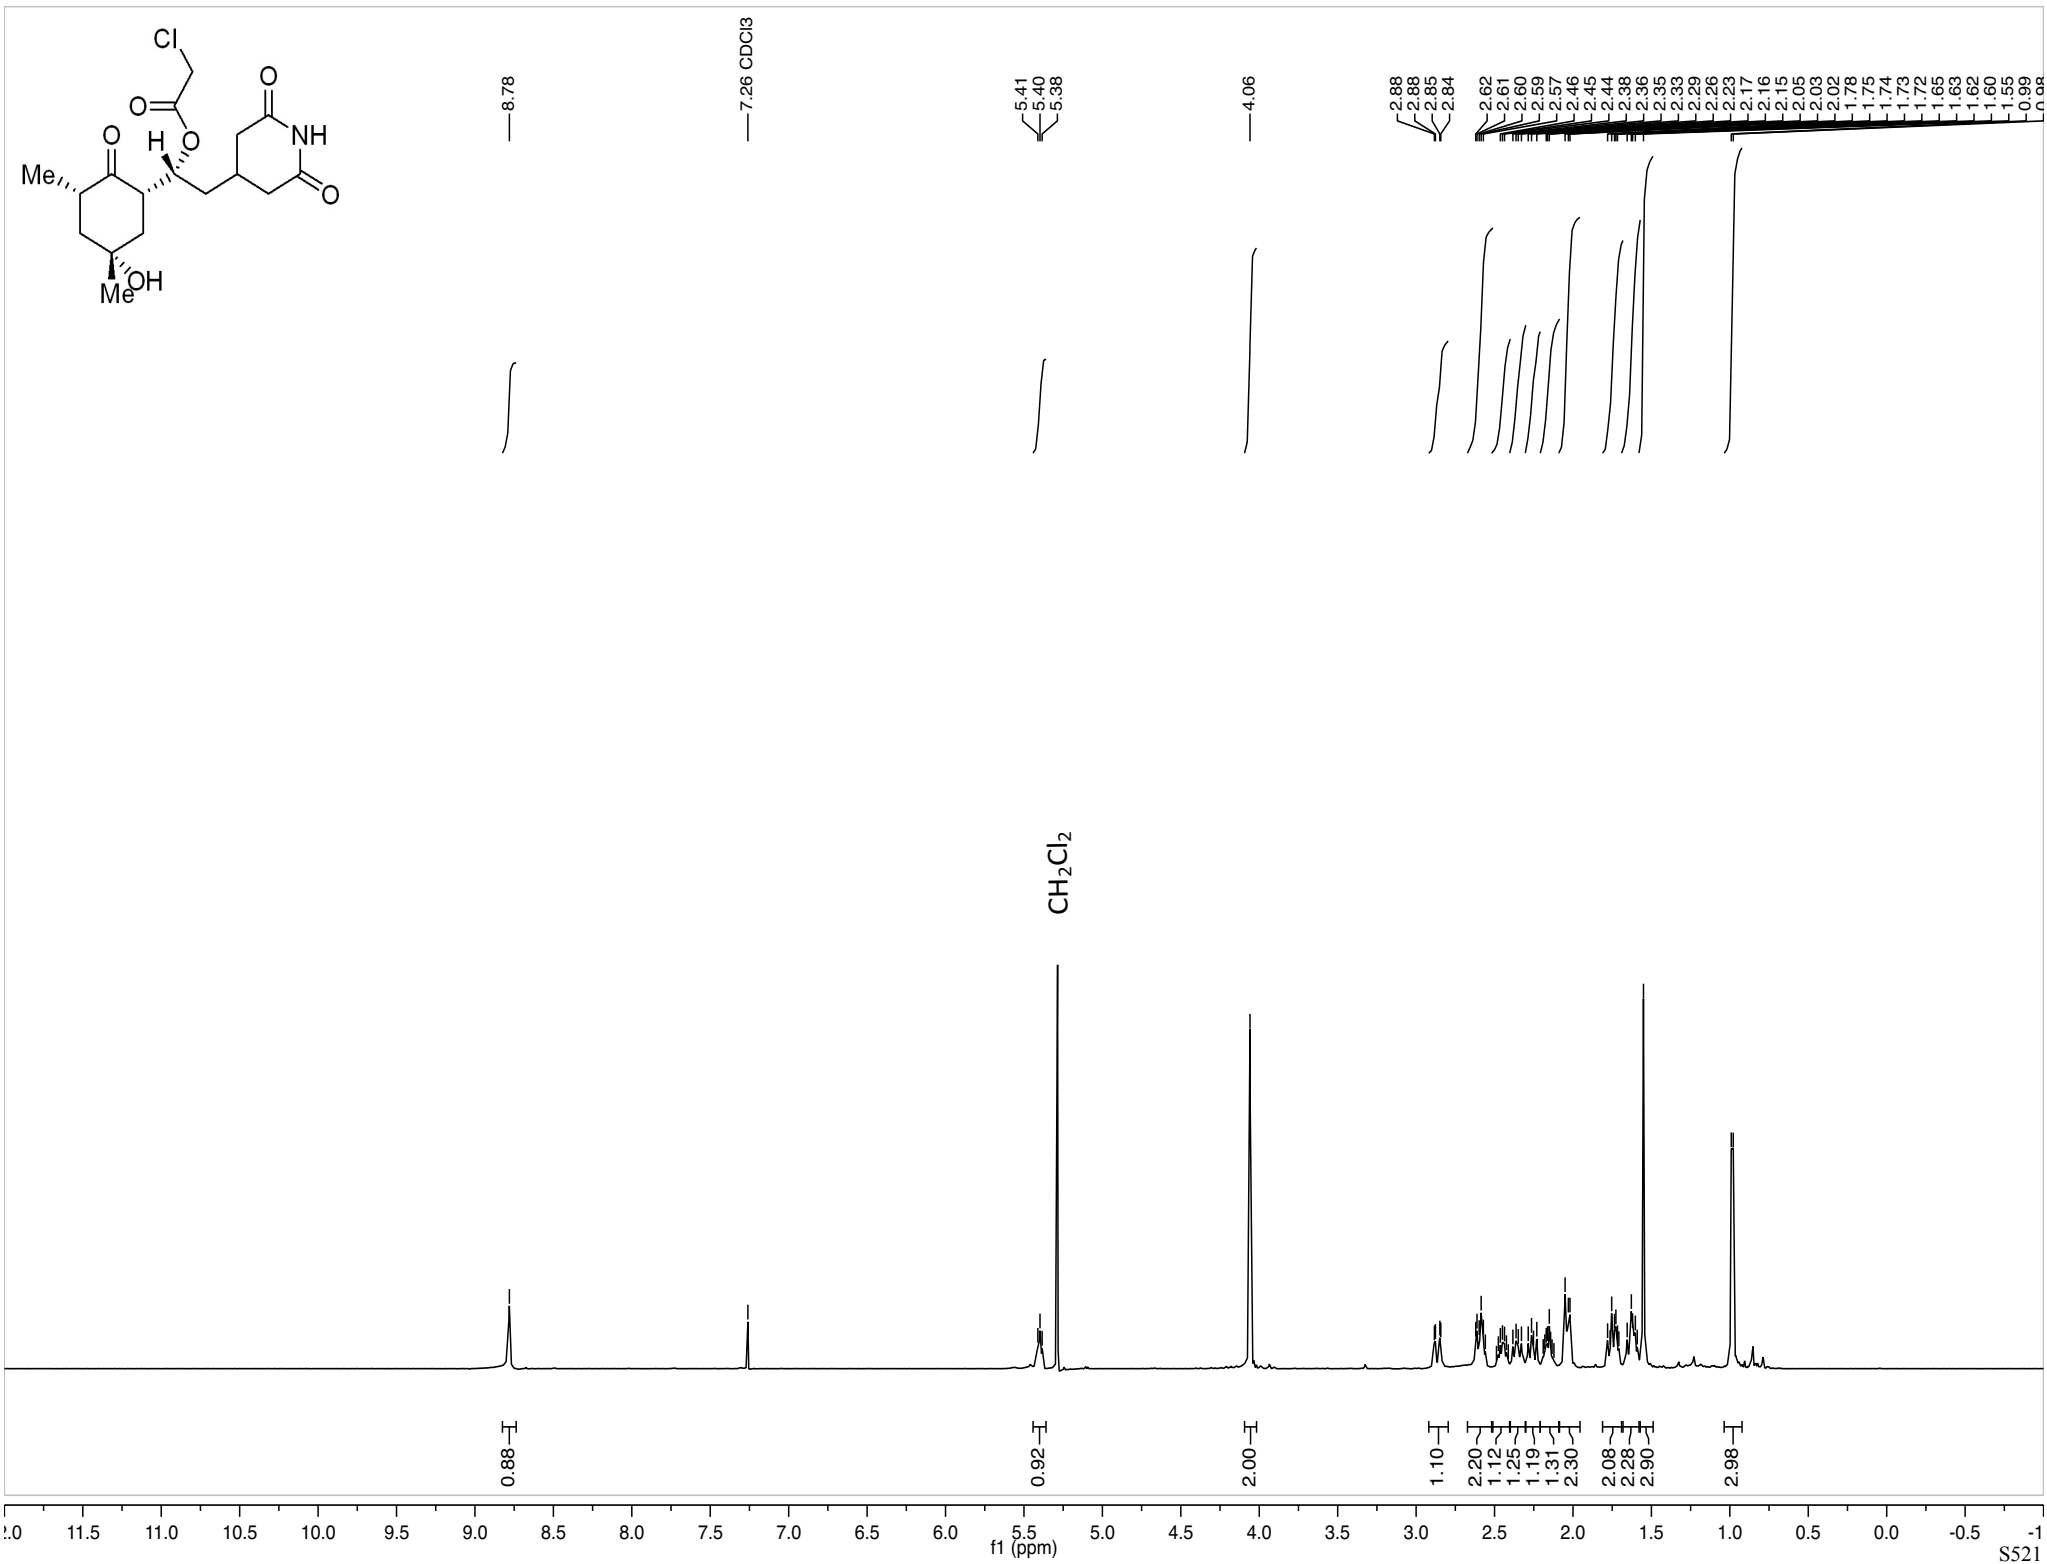

| Parameter                 | Value   |
|---------------------------|---------|
| 1 Origin                  | Varian  |
| 2 Spectrometer            | inova   |
| 3 Solvent                 | CDCl3   |
| 4 Temperature             | 20.0    |
| 5 Pulse Sequence          | s2pul   |
| 6 Experiment              | 1D      |
| 7 Probe                   | QUAD    |
| 8 Number of Scans         | 480     |
| 9 Receiver Gain           | 60      |
| 10 Relaxation Delay       | 1.0000  |
| 11 Pulse Width            | 0.0000  |
| 12 Acquisition Time       | 1.0863  |
| 13 Spectrometer Frequency | 125.66  |
| 14 Spectral Width         | 30165.9 |
| 15 Lowest Frequency       | -1279.9 |
| 16 Nucleus                | 13C     |
| 17 Acquired Size          | 32768   |
| 18 Spectral Size          | 65536   |

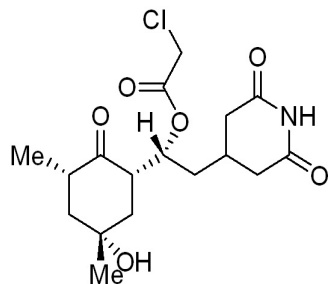

— 77.2 CDCl3

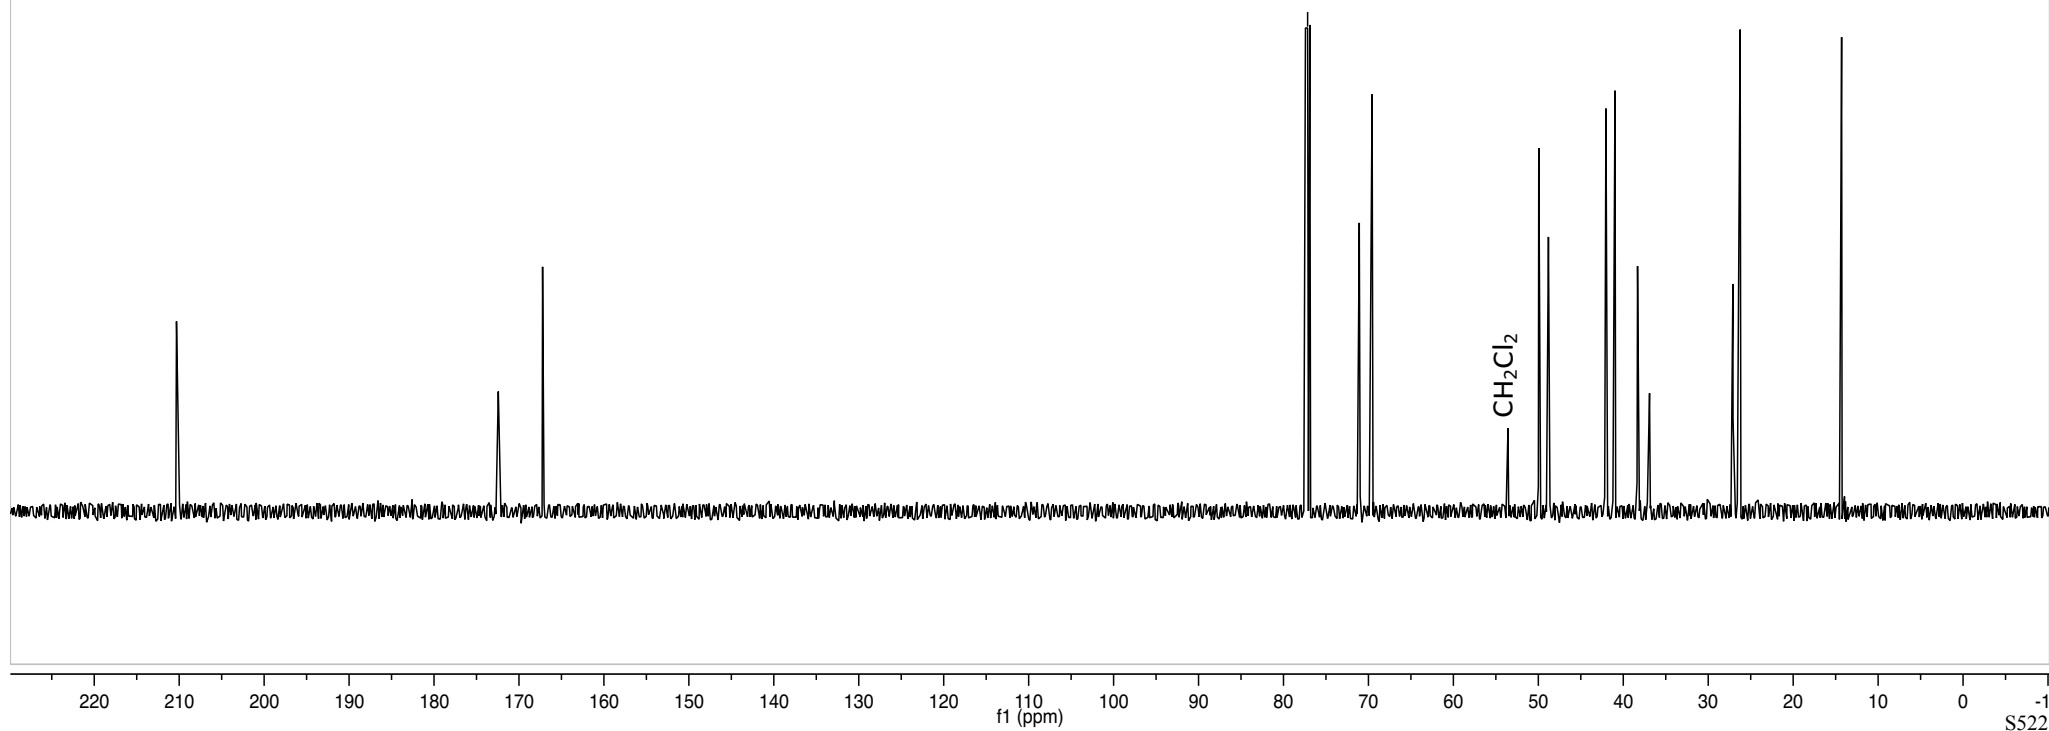

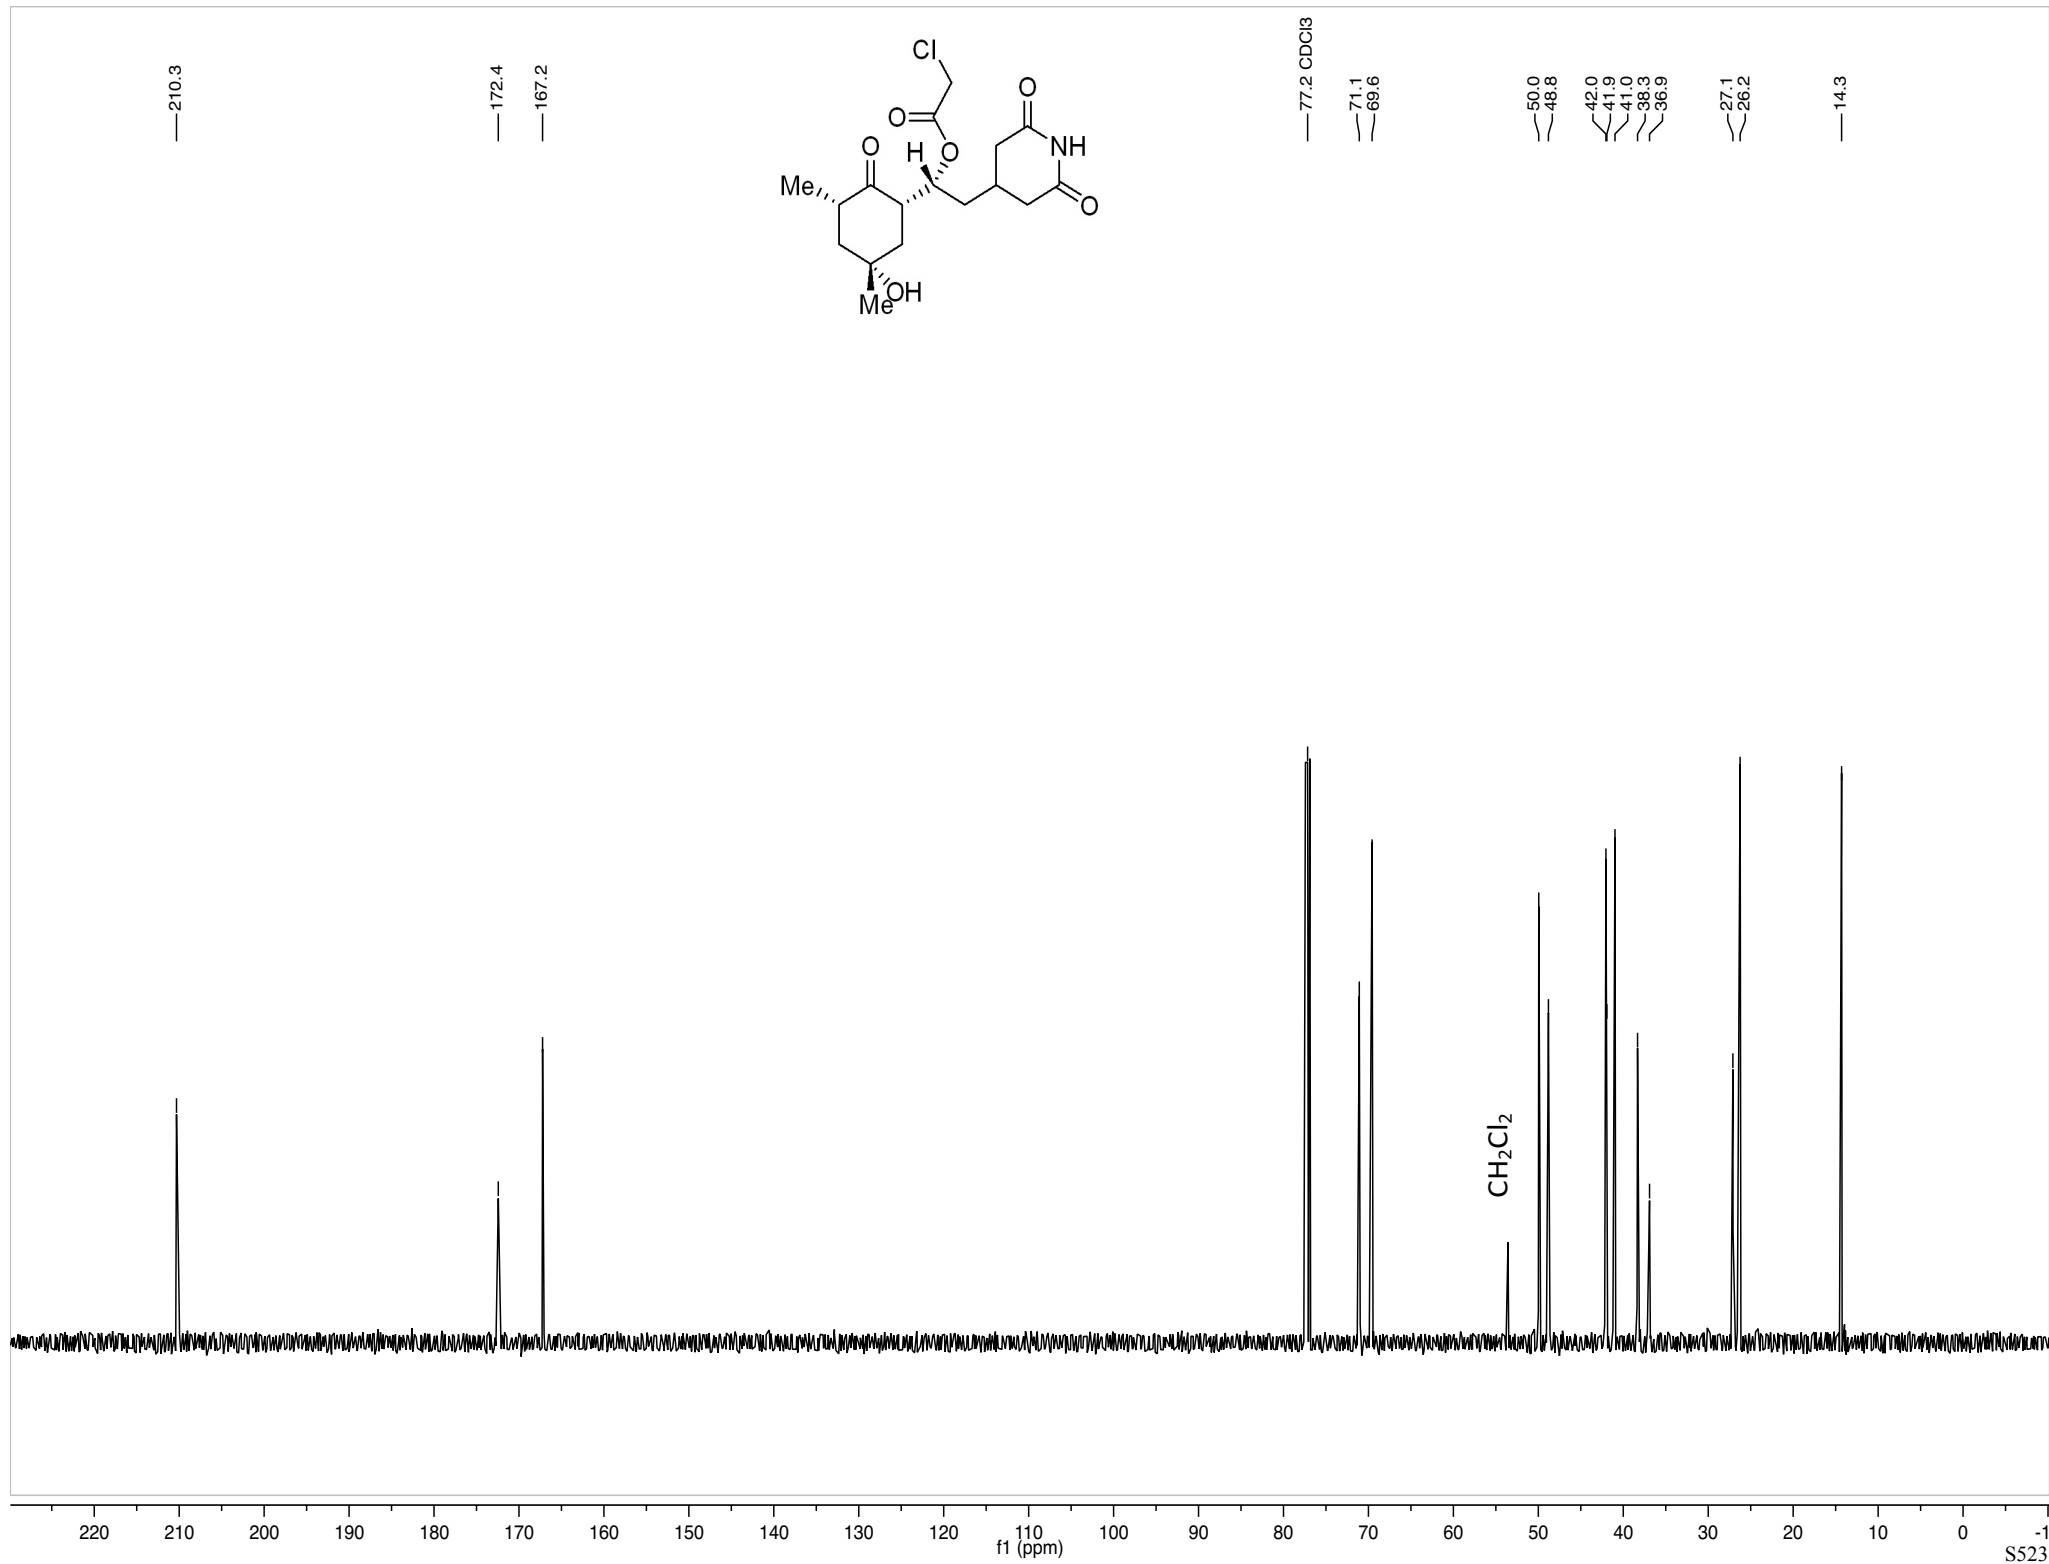

Supplement: NIHMS795543-supplement-Spectral_Data.pdf [file NIHMS795543-supplement-Spectral_Data.pdf]
